# Supplementary material
Source: PubMed Central journal article supplement (PMC6296485)

## Table of Contents

|                                                                                                                                         | page # |
|-----------------------------------------------------------------------------------------------------------------------------------------|--------|
| <b>I. General experimental protocols .....</b>                                                                                          | S4     |
| <b>II. Procedures for preparation of and characterization data for all new compounds.....</b>                                           | S5–S43 |
| General procedures A–C .....                                                                                                            | S5     |
| • Experimental details and characterization data for each of the poly-yne substrates .....                                              | S6     |
| • Experimental details and characterization data for the cyclobutadiene-derived products ....                                           | S17    |
| <b>III. Computational methods and results .....</b>                                                                                     | S44    |
| <b>IV. X-ray data for compound 8 (CCDC 1818955) .....</b>                                                                               | S68    |
| <b>IV. UV and FL spectral data for 16a and 16b .....</b>                                                                                | S70    |
| <b>V. References for Supporting Information .....</b>                                                                                   | S71    |
| <b>VI. Copies of <math>^1\text{H}</math>, <math>^{13}\text{C}</math> NMR, <math>^{19}\text{F}</math> NMR, and/or HMBC spectra .....</b> | S71    |
| <b>S1</b> $^1\text{H}/^{13}\text{C}$ .....                                                                                              | S72    |
| <b>S2</b> $^1\text{H}/^{13}\text{C}$ .....                                                                                              | S74    |
| <b>S3</b> $^1\text{H}/^{13}\text{C}$ .....                                                                                              | S76    |
| <b>S4</b> $^1\text{H}/^{13}\text{C}$ .....                                                                                              | S78    |
| <b>S5</b> $^1\text{H}/^{13}\text{C}$ .....                                                                                              | S80    |
| <b>S6</b> $^1\text{H}/^{13}\text{C}$ .....                                                                                              | S82    |
| <b>S7</b> $^1\text{H}/^{13}\text{C}$ .....                                                                                              | S84    |
| <b>S8</b> $^1\text{H}/^{13}\text{C}$ .....                                                                                              | S86    |
| <b>S9</b> $^1\text{H}/^{13}\text{C}$ .....                                                                                              | S88    |
| <b>S10</b> $^1\text{H}/^{13}\text{C}$ .....                                                                                             | S90    |
| <b>S11</b> $^1\text{H}/^{13}\text{C}$ .....                                                                                             | S92    |
| <b>S12</b> $^1\text{H}/^{13}\text{C}$ .....                                                                                             | S94    |
| <b>S13</b> $^1\text{H}/^{13}\text{C}/^{19}\text{F}$ .....                                                                               | S96    |
| <b>S14</b> $^1\text{H}/^{13}\text{C}$ .....                                                                                             | S99    |
| <b>S15</b> $^1\text{H}/^{13}\text{C}$ .....                                                                                             | S101   |
| <b>7</b> $\equiv$ <b>7a</b> $^1\text{H}/^{13}\text{C}$ .....                                                                            | S103   |
| <b>7b</b> $^1\text{H}/^{13}\text{C}$ .....                                                                                              | S105   |
| <b>7c</b> $^1\text{H}/^{13}\text{C}$ .....                                                                                              | S107   |
| <b>7e</b> $^1\text{H}/^{13}\text{C}$ .....                                                                                              | S109   |
| <b>13a</b> $\equiv$ <b>8</b> $^1\text{H}/^{13}\text{C}$ .....                                                                           | S111   |
| <b>13b</b> $^1\text{H}/^{13}\text{C}$ .....                                                                                             | S113   |
| <b>13c</b> $^1\text{H}/^{13}\text{C}$ .....                                                                                             | S115   |
| <b>13d</b> & <b>13d'</b> $^1\text{H}/^{13}\text{C}$ .....                                                                               | S117   |
| <b>13e</b> $^1\text{H}/^{13}\text{C}$ .....                                                                                             | S119   |
| <b>13f</b> $^1\text{H}/^{13}\text{C}$ .....                                                                                             | S121   |
| <b>13g</b> $^1\text{H}/^{13}\text{C}$ .....                                                                                             | S123   |
| <b>13h</b> $^1\text{H}/^{13}\text{C}$ .....                                                                                             | S125   |
| <b>13i</b> $^1\text{H}/^{13}\text{C}$ .....                                                                                             | S127   |
| <b>13i'</b> $^1\text{H}/^{13}\text{C}$ .....                                                                                            | S129   |
| <b>13j</b> $^1\text{H}/^{13}\text{C}$ .....                                                                                             | S131   |

|                      |                                          |      |
|----------------------|------------------------------------------|------|
| <b>13k</b>           | $^1\text{H}/^{13}\text{C}$               | S133 |
| <b>13l</b>           | $^1\text{H}/^{13}\text{C}$               | S135 |
| <b>13m</b>           | $^1\text{H}/^{13}\text{C}/^{19}\text{F}$ | S137 |
| <b>13n</b>           | $^1\text{H}/^{13}\text{C}$               | S140 |
| <b>13o</b>           | $^1\text{H}/^{13}\text{C}$               | S142 |
| <b>16a</b>           | $^1\text{H}/^{13}\text{C}/\text{HMBC}$   | S144 |
| <b>16b</b>           | $^1\text{H}/^{13}\text{C}/\text{HMBC}$   | S147 |
| <b>16c</b>           | $^1\text{H}/^{13}\text{C}/\text{HMBC}$   | S150 |
| <b>16c'</b>          | $^1\text{H}/^{13}\text{C}/\text{HMBC}$   | S153 |
| <b>16d</b>           | $^1\text{H}/^{13}\text{C}/\text{HMBC}$   | S156 |
| <b>18</b>            | $^1\text{H}/^{13}\text{C}/\text{HMBC}$   | S159 |
| <b>20</b>            | $^1\text{H}/^{13}\text{C}/\text{HMBC}$   | S162 |
| <b>20'</b>           | $^1\text{H}/^{13}\text{C}/\text{HMBC}$   | S165 |
| <b>21</b>            | $^1\text{H}/^{13}\text{C}/\text{HMBC}$   | S168 |
| <b>21'</b>           | $^1\text{H}/^{13}\text{C}/\text{HMBC}$   | S171 |
| <b>25a</b>           | $^1\text{H}/^{13}\text{C}/\text{HMBC}$   | S174 |
| <b>25b</b>           | $^1\text{H}/^{13}\text{C}/\text{HMBC}$   | S177 |
| <b>25c</b>           | $^1\text{H}/^{13}\text{C}/\text{HMBC}$   | S180 |
| <b>25d</b>           | $^1\text{H}/^{13}\text{C}/\text{HMBC}$   | S183 |
| <b>25e</b>           | $^1\text{H}/^{13}\text{C}/\text{HMBC}$   | S186 |
| <b>25f</b>           | $^1\text{H}/^{13}\text{C}/\text{HMBC}$   | S189 |
| <b>25g</b>           | $^1\text{H}/^{13}\text{C}/\text{HMBC}$   | S192 |
| <b>25h</b>           | $^1\text{H}/^{13}\text{C}/\text{HMBC}$   | S195 |
| <b>30</b>            | $^1\text{H}/^{13}\text{C}$               | S198 |
| <b>33a</b>           | $^1\text{H}/^{13}\text{C}$               | S200 |
| <b>33a &amp; 33b</b> | $^1\text{H}/^{13}\text{C}$               | S202 |
| <b>36</b>            | $^1\text{H}/^{13}\text{C}$               | S204 |
| <b>36 &amp; 36'</b>  | $^1\text{H}$                             | S206 |

## I. General Experimental Protocols

<sup>13</sup>C and <sup>1</sup>H NMR spectra were measured on Bruker Avance 500 (500 MHz) spectrometers. <sup>1</sup>H NMR chemical shifts in CDCl<sub>3</sub> are referenced to TMS ( $\delta = 0.00$  ppm). Non-first order multiplets are referred to by the acronym "nfom". Non-first order doublets, often seen for 1,4-disubstituted benzene derivatives, are identified as "nfod". <sup>13</sup>C NMR chemical shifts for spectra collected in CDCl<sub>3</sub> are referenced to the carbon chemical shift in CDCl<sub>3</sub> ( $\delta = 77.16$  ppm). <sup>19</sup>F NMR spectra are referenced to CFC1<sub>3</sub> ( $\delta = 0.00$  ppm, as an external reference). The following format is used to report resonances in the <sup>1</sup>H spectra: chemical shift in ppm [multiplicity, coupling constant(s) (*J*) in Hz, integration to the nearest whole number of protons, and assignment]. <sup>1</sup>H NMR assignments are given by the substructure environment, e.g., OCH<sub>a</sub>H<sub>b</sub>. Complex structures are often numbered in the graphic in order to simplify the proton assignment identification. Coupling constant analysis was guided by methods we have described elsewhere.<sup>[1,2]</sup>

Infrared spectra were measured as thin films with a Midac Corporation Prospect 4000 FT-IR spectrometer in the ATR mode (germanium window). Only particularly diagnostic and/or intense peaks are given.

High-resolution mass spectrometry (HRMS) measurements were determined on a Bruker BioTOF II (ESI-TOF) instrument in the electrospray ionization (ESI) mode. PPG or PEG was added to the sample as an internal calibrant/standard. Samples were dissolved in MeOH or DCM/MeOH. One low resolution measurement was made with a Expression CMS instrument using APCI.

UV-Vis absorption spectra were recorded in THF at a concentration of 10<sup>-5</sup> M on a Varian Cary 50 Bio UV-Visible Spectrophotometer. Fluorescence data were obtained in THF at a concentration of 10<sup>-7</sup> M using a Varian Cary Eclipse Fluorescence Spectrophotometer.

“MPLC refers to medium pressure liquid chromatography (ca. 50–100 psi) using columns packed with RediSep Rf Gold® Normal-Phase Silica (Teledyne/ISCO, 20–40  $\mu$ m, 60 Å pore size). Eluent was delivered with a Waters HPLC pump; a differential refractive index detector (Waters R401) was used to detect the eluted solute. Flash chromatography was performed with columns packed with E. Merck silica gel (230-400 mesh). Thin layer chromatography was done on plastic-backed plates of silica gel; TLC visualization was done by ceric ammonium molybdate staining and/or UV detection.”

Reactions performed under anhydrous conditions were done under an atmosphere of nitrogen in flame-dried glassware. Anhydrous methylene chloride was collected immediately prior to use after being freshly passed through a column containing activated alumina. Chloroform (amylene-stabilized) was passed through activated alumina before use. The reaction temperatures reported are the temperature of an external heating bath of the air surrounding the reaction tube. Reactions carried out at temperatures higher than the boiling point of the reaction solvent were performed in a screw-capped vial culture tube or vial, sealed with an inert, Teflon®-lined screw cap.



## II. Procedures for preparation of and characterization data for all new compounds

### A. General procedure for the Cadiot–Chodkiewicz alkyne/alkyne cross-coupling reaction

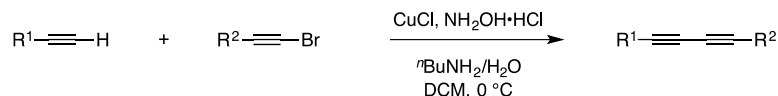

CuCl (0.10 equiv relative to the terminal alkyne substrate) was dissolved in a 30:70 (v:v) mixture of *n*BuNH<sub>2</sub>:H<sub>2</sub>O (5.0 mL/mmol relative to the terminal alkyne substrate). An excess of NH<sub>2</sub>OH·HCl (ca. 10 mg per mmol of the terminal alkyne substrate) was added with stirring. The color of this solution changed from deep blue to colorless immediately, indicating full conversion of any Cu(II) to Cu(I). The headspace of the reaction vessel was flushed with N<sub>2</sub>. The flask was closed with a septum, a balloon of nitrogen gas was attached, and the flask was cooled in an ice water bath. The terminal alkyne (1.0 equiv) in CH<sub>2</sub>Cl<sub>2</sub> (ca. 2.5 mL/mmol) was injected into the flask, resulting in a yellow, orange, or red suspension, indicative of formation of an alkynyl copper species. After ca. 5 min, a solution of the 1-bromoalkyne (1.2–1.5 equiv) in CH<sub>2</sub>Cl<sub>2</sub> (ca. 2.5 mL/mmol) was injected dropwise over ca. 15 min using a syringe pump. This reaction mixture was stirred at the indicated temperature (0 °C or rt). The suspension of the alkynyl copper would typically turn to a clear, two layer mixture over the course of 10–100 min, indicating consumption of the alkynyl copper species. The reaction mixture was quenched by the addition of satd. aq. NH<sub>4</sub>Cl and then extracted with CH<sub>2</sub>Cl<sub>2</sub>. The combined extracts were dried, filtered, and concentrated. The residue was purified by flash chromatography on silica gel.

### B. General procedure for esterification of propargylic alcohols with propiolic acids using DCC.

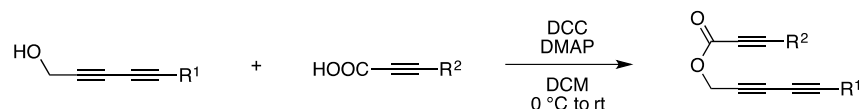

The propargylic alcohol (1.0 equiv), 4-dimethylaminopyridine (DMAP, 10 mol%), and propiolic acid (1.5 equiv) were dissolved in anhydrous DCM (10 mL/mmol with respect to the propargyl alcohol) and stirred at 0 °C. *N,N'*-Dicyclohexylcarbodiimide (DCC\*, 1.1–1.2 equiv) was added to the solution, after which the headspace of the reaction flask was purged with N<sub>2</sub>. The resulted brown suspension was warmed to room temperature and stirred for, typically, 16 h. The crude reaction mixture was filtered by passing through a short silica plug, concentrated, and purified by flash chromatography or MPLC.

\*CAUTION: DCC is an irritant and can induce sensitization. Avoid any direct contact with the skin and inhalation.

### C. General procedure for the HDDA-dimerization reaction

The poly-yne precursor(s) was added to an oven-dried, threaded glass vial. Chloroform (the source was amylene-stabilized rather than ethanol-stabilized, because ethanol is known to react with HDDA-benzynes<sup>[31]</sup>) was added to arrive at a poly-yne concentration of 0.050 M. The headspace of the vial was purged with a gentle flow of N<sub>2</sub> gas, and the vial was sealed with a Teflon-lined cap. The reaction solution was stirred in a heated oil bath held at the indicated temperature. After the poly-yne had been consumed (TLC), the vial was cooled to room temperature. The solution was concentrated *in vacuo*, and the residue was directly subjected to MPLC for purification, using the indicated elution solvent.

• Experimental details and characterization data for each of the poly-yne substrates

**6,6-Dimethylhepta-2,4-diyne-1-yl propiolate (7)**

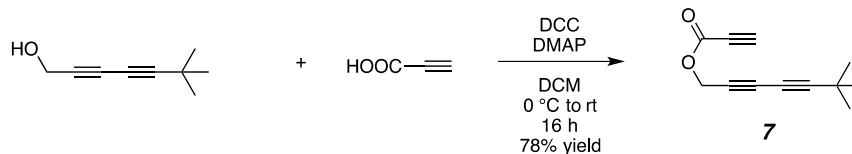

Following general procedure B, 6,6-dimethylhepta-2,4-diyne-1-ol<sup>[4]</sup> (0.14 g, 1.0 mmol), propiolic acid (93  $\mu\text{L}$ , 1.5 mmol), DMAP (12 mg, 0.10 mmol), DCC (0.25 g, 1.2 mmol), and DCM (10 mL) were used to prepare triyne **7**. Purification of the crude material by flash chromatography (hexanes:EtOAc 20:1) provided triyne **7** (0.15 g, 0.78 mmol, 78%) as a pale yellow oil.

**<sup>1</sup>H NMR** (500 MHz,  $\text{CDCl}_3$ ):  $\delta$  4.83 (s, 2H,  $\text{CH}_2\text{O}$ ), 2.94 (s, 1H,  $\equiv\text{CH}$ ), and 1.25 [s, 9H,  $\text{C}(\text{CH}_3)_3$ ].

**<sup>13</sup>C NMR** (126 MHz,  $\text{CDCl}_3$ ):  $\delta$  151.9, 90.3, 76.1, 74.0, 72.7, 69.0, 63.0, 54.2, 30.4, and 28.2.

**IR** (neat): 3288, 2973, 2932, 2869, 2124, 1722, 1366, 1289, 1178, 968, 840, and 780  $\text{cm}^{-1}$ .

**HRMS** (ESI-TOF): Calcd for  $\text{C}_{12}\text{H}_{12}\text{NaO}_2^+$  [ $\text{M}+\text{Na}^+$ ] requires 211.0730; found 211.0735.

**6-((*tert*-Butyldimethylsilyloxy)-6-methylhepta-2,4-diyne-1-ol (S1)**

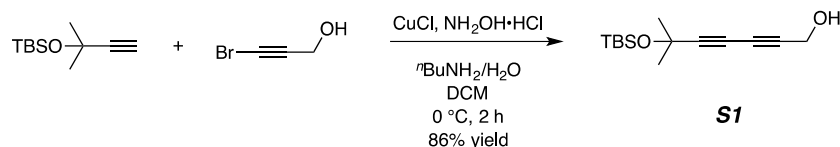

Following general procedure A, *tert*-butyldimethyl((2-methylbut-3-yn-2-yl)oxy)silane<sup>[5]</sup> (0.79 g, 4 mmol), 3-bromoprop-2-yn-1-ol (0.68 g, 5 mmol), CuCl (40 mg, 0.4 mmol), *n*-butylamine/ $\text{H}_2\text{O}$  (v:v, 30:70, 20 mL), and DCM (20 mL) were used to prepare diyne **S1**. Purification of the crude material by flash chromatography (hexanes:EtOAc 6:1) provided diyne **S1** (0.86 g, 3.4 mmol, 86%) as a pale yellow oil.

**<sup>1</sup>H NMR** (500 MHz,  $\text{CDCl}_3$ ):  $\delta$  4.35 (s, 2H,  $\text{CH}_2\text{OH}$ ), 1.75 (br s, 1H,  $\text{CH}_2\text{OH}$ ), 1.47 [s, 6H,  $\text{C}(\text{CH}_3)_2$ ], 0.86 [s, 9H,  $\text{Si}(\text{CH}_3)_3$ ], and 0.17 [s, 6H,  $\text{Si}(\text{CH}_3)_2$ ].

**<sup>13</sup>C NMR** (126 MHz,  $\text{CDCl}_3$ ):  $\delta$  84.9, 77.4, 70.2, 67.0, 66.7, 51.7, 32.7, 25.8, 18.0, and -3.0.

**IR** (neat): 3320, 2984, 2956, 2930, 2857, 2156, 1462, 1360, 1254, 1167, 1150, 1037, 838, and 776  $\text{cm}^{-1}$ .

**HRMS** (ESI-TOF): Calcd for  $\text{C}_{14}\text{H}_{24}\text{NaO}_2\text{Si}^+$  [ $\text{M}+\text{Na}^+$ ] requires 275.1438; found 275.1437.

**6-((*tert*-Butyldimethylsilyloxy)-6-methylhepta-2,4-diyn-1-yl propiolate (S2)**
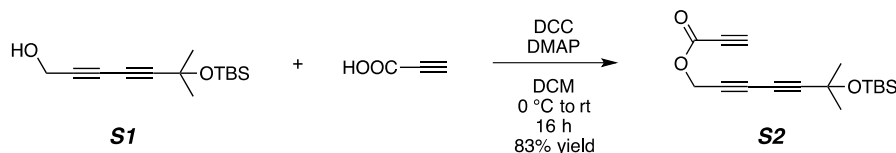

Following general procedure B, propargyl alcohol **S1** (0.38 g, 1.5 mmol), propiolic acid (0.14 mL, 2.2 mmol), DMAP (18 mg, 0.15 mmol), DCC (0.34 g, 1.6 mmol), and DCM (15 mL) were used to prepare triyne **S2**. Purification of the crude material by flash chromatography (hexanes:EtOAc 20:1) provided triyne **S2** (0.38 g, 1.2 mmol, 83%) as a pale yellow oil.

**<sup>1</sup>H NMR** (500 MHz, CDCl<sub>3</sub>): δ 4.86 (s, 2H, CH<sub>2</sub>O), 2.96 (s, 1H, ≡CH), 1.47 [s, 6H, C(CH<sub>3</sub>)<sub>2</sub>], 0.86 [s, 9H, SiC(CH<sub>3</sub>)<sub>3</sub>], and 0.16 [s, 6H, Si(CH<sub>3</sub>)<sub>2</sub>].

**<sup>13</sup>C NMR** (126 MHz, CDCl<sub>3</sub>): δ 151.8, 85.7, 76.2, 73.9, 72.0, 71.5, 66.73, 66.71, 54.1, 32.6, 25.8, 18.0, and -2.9.

**IR** (neat): 3291, 2984, 2955, 2931, 2857, 2124, 1725, 1361, 1252, 1156, 1039, 971, 838, and 777 cm<sup>-1</sup>.

**HRMS** (ESI-TOF): Calcd for C<sub>17</sub>H<sub>24</sub>NaO<sub>3</sub>Si<sup>+</sup> [M+Na<sup>+</sup>] requires 327.1387; found 327.1387.

**6-((*tert*-Butyldimethylsilyloxy)hepta-2,4-diyn-1-ol (S3)**
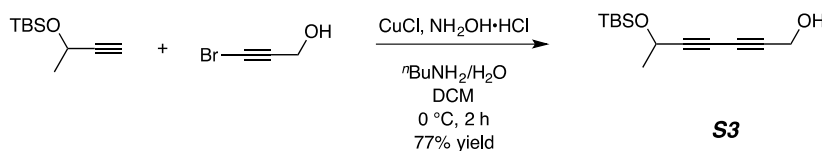

Following general procedure A, (but-3-yn-2-yloxy)(*tert*-butyl)dimethylsilane<sup>[6]</sup> (0.55 g, 3 mmol), 3-bromoprop-2-yn-1-ol (0.61 g, 4.5 mmol), CuCl (30 mg, 0.3 mmol), *n*-butylamine/H<sub>2</sub>O (v:v, 30:70, 15 mL), and DCM (15 mL) were used to prepare diyne **S3**. Purification of the crude material by flash chromatography (hexanes:EtOAc 6:1) provided diyne **S3** (0.55 g, 2.3 mmol, 77%) as a pale yellow oil.

**<sup>1</sup>H NMR** (500 MHz, CDCl<sub>3</sub>): δ 4.57 [q, *J* = 6.6 Hz, 1H, CH(CH<sub>3</sub>)], 4.34 (s, 2H, CH<sub>2</sub>OH), 1.75 (br s, 1H, CH<sub>2</sub>OH), 1.42 [d, *J* = 6.6 Hz, 3H, HC(CH<sub>3</sub>)], 0.90 [s, 9H, SiC(CH<sub>3</sub>)<sub>3</sub>], 0.13 [s, 3H, Si(CH<sub>3</sub>)<sub>a</sub>], and 0.11 [s, 3H, Si(CH<sub>3</sub>)<sub>b</sub>].

**<sup>13</sup>C NMR** (126 MHz, CDCl<sub>3</sub>): δ 82.2, 77.1, 70.2, 67.5, 59.4, 51.6, 25.9, 25.1, 18.3, -4.5, and -4.9.

**IR** (neat): 3341, 2983, 2955, 2931, 2858, 2160, 1471, 1338, 1253, 1101, 1050, 1019, 966, 837, and 778 cm<sup>-1</sup>.

**HRMS** (ESI-TOF): Calcd for C<sub>13</sub>H<sub>22</sub>NaO<sub>2</sub>Si<sup>+</sup> [M+Na<sup>+</sup>] requires 261.1281; found 261.1275.

### 6-((*tert*-Butyldimethylsilyl)oxy)hepta-2,4-diyn-1-yl propiolate (**S4**)

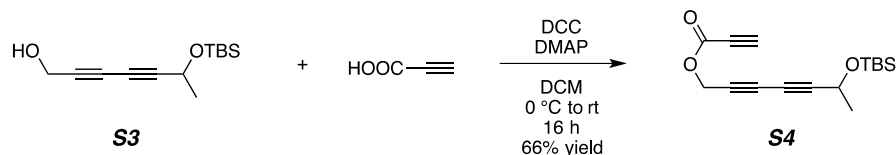

Following general procedure B, propargyl alcohol **S3** (0.47 g, 2.0 mmol), propiolic acid (0.19 mL, 3.0 mmol), DMAP (24 mg, 0.20 mmol), DCC (0.49 g, 2.4 mmol), and DCM (20 mL) were used to prepare triyne **S4**. Purification of the crude material by flash chromatography (hexanes:EtOAc 20:1) provided triyne **S4** (0.38 g, 1.3 mmol, 66%) as a pale yellow oil.

**<sup>1</sup>H NMR** (500 MHz, CDCl<sub>3</sub>):  $\delta$  4.85 (s, 2H, CH<sub>2</sub>O), 4.56 [q,  $J$  = 6.6 Hz, 1H, CH(CH<sub>3</sub>)], 2.96 (s, 1H,  $\equiv$ CH), 1.43 [d,  $J$  = 6.6 Hz, 3H, HC(CH<sub>3</sub>)], 0.90 [s, 9H, SiC(CH<sub>3</sub>)<sub>3</sub>], 0.13 [s, 3H, Si(CH<sub>3</sub>)<sub>a</sub>], and 0.11 [s, 3H, Si(CH<sub>3</sub>)<sub>b</sub>].

**<sup>13</sup>C NMR** (126 MHz, CDCl<sub>3</sub>):  $\delta$  151.8, 83.1, 76.2, 73.9, 72.0, 71.2, 67.1, 59.4, 54.1, 25.9, 25.0, 18.3, -4.5, and -4.9.

**IR** (neat): 3289, 2954, 2931, 2858, 2124, 1725, 1471, 1368, 1252, 1102, 1051, 975, 836, and 779 cm<sup>-1</sup>.

**HRMS** (ESI-TOF): Calcd for C<sub>16</sub>H<sub>22</sub>NaO<sub>3</sub>Si<sup>+</sup> [M+Na<sup>+</sup>] requires 313.1230; found 313.1235.

### 5-Cyclopropylpenta-2,4-diyn-1-yl propiolate (**S5**)

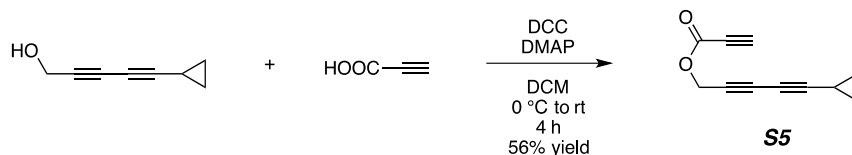

Following general procedure B, 5-cyclopropylpenta-2,4-diyn-1-ol<sup>[7]</sup> (0.12 g, 1.0 mmol), propiolic acid (93  $\mu$ L, 1.5 mmol), DMAP (12 mg, 0.10 mmol), DCC (0.25 g, 1.2 mmol), and DCM (10 mL) were used to prepare triyne **S5**. Purification of the crude material by flash chromatography (hexanes:EtOAc 20:1) provided triyne **S5** (97 mg, 0.56 mmol, 56%) as a light brown oil.

**<sup>1</sup>H NMR** (500 MHz, CDCl<sub>3</sub>):  $\delta$  4.82 (s, 2H, CH<sub>2</sub>O), 2.94 (s, 1H,  $\equiv$ CH), 1.36–1.30 (nfom, 1H,  $\equiv$ CCH), 0.88–0.83 (nfom, 2H, CH<sub>a</sub>CH<sub>a</sub>), and 0.82–0.78 (nfom, 2H, CH<sub>b</sub>CH<sub>b</sub>).

**<sup>13</sup>C NMR** (126 MHz, CDCl<sub>3</sub>):  $\delta$  151.9, 86.0, 76.1, 74.0, 73.1, 67.2, 59.6, 54.3, 9.1, and 0.2.

**IR** (neat): 3281, 3016, 2945, 2122, 1720, 1429, 1377, 1356, 1090, 1031, 970, 938, and 829 cm<sup>-1</sup>.

**HRMS** (ESI-TOF): Calcd for C<sub>11</sub>H<sub>8</sub>NaO<sub>2</sub><sup>+</sup> [M+Na<sup>+</sup>] requires 195.0417; found 195.0413.

**6,6-Dimethylhepta-2,4-diyne-1-yl 3-(trimethylsilyl)propiolate (S6)**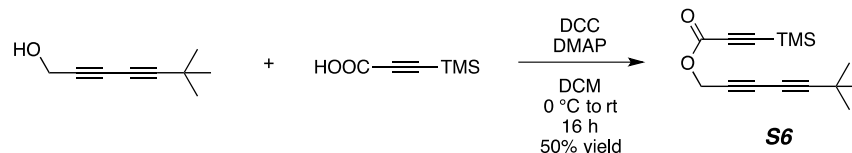

Following general procedure B, 6,6-dimethylhepta-2,4-diyne-1-ol<sup>[4]</sup> (0.14 g, 1.0 mmol), 3-(trimethylsilyl)propiolic acid (0.21 g, 1.5 mmol), DMAP (12 mg, 0.10 mmol), DCC (0.25 g, 1.2 mmol), and DCM (10 mL) were used to prepare triyne **S6**. Purification of the crude material by MPLC (hexanes:EtOAc 50:1) provided triyne **S6** (0.13 g, 0.50 mmol, 50%) as a white solid.

**<sup>1</sup>H NMR** (500 MHz, CDCl<sub>3</sub>): δ 4.80 (s, 2H, CH<sub>2</sub>O), 1.24 [s, 9H, C(CH<sub>3</sub>)<sub>3</sub>], and 0.25 [s, 9H, Si(CH<sub>3</sub>)<sub>3</sub>].

**<sup>13</sup>C NMR** (126 MHz, CDCl<sub>3</sub>): δ 152.0, 95.8, 93.7, 90.1, 72.4, 69.3, 63.0, 53.8, 30.4, 28.1, and -0.8.

**IR** (neat): 2970, 2933, 2869, 2174, 2118, 1719, 1365, 1253, 1179, 847, and 782 cm<sup>-1</sup>.

**HRMS** (ESI-TOF): Calcd for C<sub>15</sub>H<sub>20</sub>NaO<sub>2</sub>Si<sup>+</sup> [M+Na<sup>+</sup>] requires 283.1125; found 283.1134.

**Mp**: 31–33 °C.

**5-Phenylpenta-2,4-diyne-1-yl 3-(trimethylsilyl)propiolate (S7)**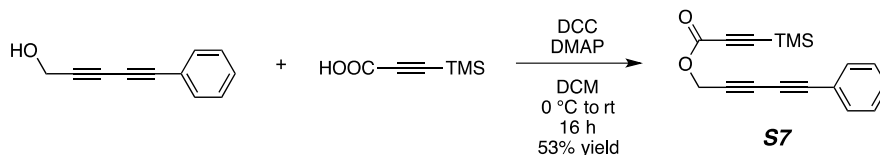

Following general procedure B, 5-phenylpenta-2,4-diyne-1-ol<sup>[4]</sup> (0.16 g, 1.0 mmol), 3-(trimethylsilyl)propiolic acid (0.21 g, 1.5 mmol), DMAP (12 mg, 0.10 mmol), DCC (0.25 g, 1.2 mmol), and DCM (10 mL) were used to prepare triyne **S7**. Purification of the crude material by MPLC (hexanes:EtOAc 50:1) provided triyne **S7** (0.15 g, 0.53 mmol, 53%) as a pale yellow solid.

**<sup>1</sup>H NMR** (500 MHz, CDCl<sub>3</sub>): δ 7.49 (nfod, *J* = 7.0 Hz, 2H, PhH<sub>o</sub>), 7.38 (tt, *J* = 7.5, 1.4 Hz, 1H, PhH<sub>p</sub>), 7.33 (nfodd, *J* = 7.5, 7.0 Hz, 2H, PhH<sub>m</sub>), 4.90 (s, 2H, CH<sub>2</sub>O), and 0.26 [s, 9H, Si(CH<sub>3</sub>)<sub>3</sub>].

**<sup>13</sup>C NMR** (126 MHz, CDCl<sub>3</sub>): δ 152.1, 132.8, 129.7, 128.6, 121.2, 96.2, 93.6, 79.4, 75.0, 73.0, 72.2, 53.9, and -0.8.

**IR** (neat): 2963, 2904, 2174, 1719, 1652, 1558, 1368, 1254, 1110, 1025, 977, 865, and 826 cm<sup>-1</sup>.

**HRMS** (ESI-TOF): Calcd for C<sub>17</sub>H<sub>16</sub>NaO<sub>2</sub>Si<sup>+</sup> [M+Na<sup>+</sup>] requires 303.0812; found 303.0799.

**Mp**: 60–62 °C.

### 5-(*o*-Tolyl)penta-2,4-diyne-1-yl 3-(trimethylsilyl)propiolate (**S8**)

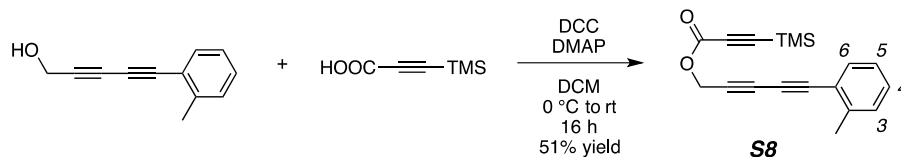

Following general procedure B, 5-(*o*-tolyl)penta-2,4-diyne-1-ol<sup>[8]</sup> (0.17 g, 1.0 mmol), 3-(trimethylsilyl)propiolic acid (0.21 g, 1.5 mmol), DMAP (12 mg, 0.10 mmol), DCC (0.25 g, 1.2 mmol), and DCM (10 mL) were used to prepare triyne **S8**. Purification of the crude material by MPLC (hexanes:EtOAc 50:1) provided triyne **S8** (0.15 g, 0.51 mmol, 51%) as a pale yellow oil.

**<sup>1</sup>H NMR** (500 MHz, CDCl<sub>3</sub>): δ 7.45 (dd, *J* = 7.8, 0.9 Hz, 1H, *H*6), 7.27 (ddd, *J* = 7.5, 7.5, 1.1 Hz, 1H, *H*4), 7.20 (d, *J* = 7.8 Hz, 1H, *H*3), 7.20 (dd, *J* = 7.4, 7.4 Hz, 1H, *H*5), 4.91 (s, 2H, CH<sub>2</sub>O), 2.44 (s, 3H, ArCH<sub>3</sub>), and 0.26 [s, 9H, Si(CH<sub>3</sub>)<sub>3</sub>].

**<sup>13</sup>C NMR** (126 MHz, CDCl<sub>3</sub>): δ 152.1, 142.2, 133.3, 129.74, 129.66, 125.8, 121.0, 96.2, 93.7, 78.4, 76.5, 75.5, 72.3, 54.0, 20.8, and -0.8.

**IR** (neat): 2963, 2903, 2174, 2126, 1719, 1599, 1430, 1368, 1253, 1161, 1091, 978, 848, and 757 cm<sup>-1</sup>.

**HRMS** (ESI-TOF): Calcd for C<sub>18</sub>H<sub>18</sub>NaO<sub>2</sub>Si<sup>+</sup> [M+Na<sup>+</sup>] requires 317.0968; found 317.0965.

### 5-(4-Methoxyphenyl)penta-2,4-diyne-1-yl 3-(trimethylsilyl)propiolate (**S9**)

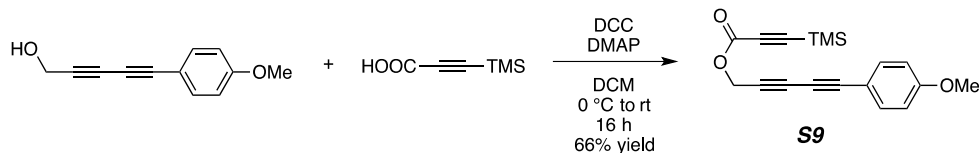

Following general procedure B, 5-(4-methoxyphenyl)penta-2,4-diyne-1-ol<sup>[8]</sup> (0.21 g, 1.0 mmol), 3-(trimethylsilyl)propiolic acid (0.21 g, 1.5 mmol), DMAP (12 mg, 0.10 mmol), DCC (0.25 g, 1.2 mmol), and DCM (10 mL) were used to prepare triyne **S9**. Purification of the crude material by MPLC (hexanes:EtOAc 20:1) provided triyne **S9** (0.21 g, 0.66 mmol, 66%) as a pale yellow solid.

**<sup>1</sup>H NMR** (500 MHz, CDCl<sub>3</sub>): δ 7.43 (nfod, *J* = 8.7 Hz, 2H, *H*2), 6.84 (nfod, *J* = 8.8 Hz, 2H, *H*3), 4.89 (s, 2H, CH<sub>2</sub>O), 3.81 (s, 3H, OCH<sub>3</sub>), and 0.25 [s, 9H, Si(CH<sub>3</sub>)<sub>3</sub>].

**<sup>13</sup>C NMR** (126 MHz, CDCl<sub>3</sub>): δ 160.8, 152.1, 134.5, 114.3, 113.1, 96.0, 93.7, 79.7, 74.5, 72.5, 72.0, 55.5, 54.0, and -0.8.

**IR** (neat): 3011, 2963, 2902, 2843, 2176, 1717, 1603, 1510, 1369, 1252, 1175, 1029, 865, 822, and 755 cm<sup>-1</sup>.

**HRMS** (ESI-TOF): Calcd for C<sub>18</sub>H<sub>18</sub>NaO<sub>3</sub>Si<sup>+</sup> [M+Na<sup>+</sup>] requires 333.0917; found 333.0926.

**Mp**: 59–62 °C.

### Methyl 4-(5-Hydroxypenta-1,3-diyne-1-yl)benzoate (**S10**)

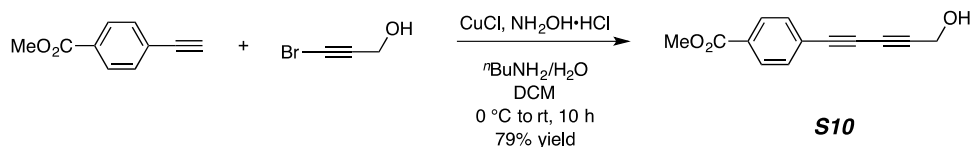

Following general procedure A, methyl 4-ethynylbenzoate (0.32 g, 2 mmol), 3-bromoprop-2-yn-1-ol (0.34 g, 2.5 mmol), CuCl (20 mg, 0.2 mmol), *n*-butylamine/H<sub>2</sub>O (v:v, 30:70, 10 mL), and DCM (10 mL) were used to prepare diyne **S10**. Purification of the crude material by flash chromatography (hexanes:EtOAc 2:1) provided **S10** (0.34 g, 1.6 mmol, 79%) as a yellow solid.

**<sup>1</sup>H NMR** (500 MHz, CDCl<sub>3</sub>): δ 7.99 (nfod, *J* = 8.5 Hz, 2H, *H*<sub>2</sub>), 7.55 (nfod, *J* = 8.5 Hz, 2H, *H*<sub>3</sub>), 4.44 (s, 2H, CH<sub>2</sub>OH), 3.92 (s, 3H, OCH<sub>3</sub>), and 1.77 (br s, 1H, OH).

**<sup>13</sup>C NMR** (126 MHz, CDCl<sub>3</sub>): δ 166.4, 132.6, 130.6, 129.7, 126.2, 82.0, 77.6, 76.0, 70.3, 52.5, and 51.8.

**IR** (neat): 3503, 3006, 2957, 2127, 1694, 1607, 1438, 1403, 1310, 1278, 1109, 1022, 960, 850, and 763 cm<sup>-1</sup>.

**HRMS** (ESI-TOF): Calcd for C<sub>13</sub>H<sub>10</sub>NaO<sub>3</sub><sup>+</sup> [*M*+Na<sup>+</sup>] requires 237.0522; found 237.0525.

**Mp**: 126–130 °C.

### Methyl 4-(5-((3-(Trimethylsilyl)propioloyl)oxy)penta-1,3-diyne-1-yl)benzoate (**S11**)

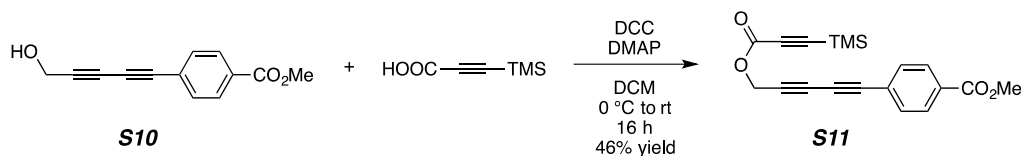

Following general procedure B, propargyl alcohol **S10** (0.21 g, 1.0 mmol), 3-(trimethylsilyl)propionic acid (0.21 g, 1.5 mmol), DMAP (12 mg, 0.10 mmol), DCC (0.25 g, 1.2 mmol), and DCM (10 mL) were used to prepare triyne **S11**. Purification of the crude material by MPLC (hexanes:EtOAc 9:1) provided **S11** (0.16 g, 0.46 mmol, 46%) as a pale yellow solid.

**<sup>1</sup>H NMR** (500 MHz, CDCl<sub>3</sub>): δ 7.99 (nfod, *J* = 8.6 Hz, 2H, *H*<sub>2</sub>), 7.55 (nfod, *J* = 8.5 Hz, 2H, *H*<sub>3</sub>), 4.91 (s, 2H, CH<sub>2</sub>O), 3.92 (s, 3H, OCH<sub>3</sub>), and 0.26 [s, 9H, Si(CH<sub>3</sub>)<sub>3</sub>].

**<sup>13</sup>C NMR** (126 MHz, CDCl<sub>3</sub>): δ 166.3, 152.0, 132.7, 130.8, 129.7, 125.8, 96.3, 93.6, 78.2, 76.5, 75.7, 71.8, 53.8, 52.5, and -0.8.

**IR** (neat): 3011, 2959, 2902, 2855, 2176, 1720, 1695, 1438, 1402, 1276, 1255, 1212, 1119, 1018, 908, and 824 cm<sup>-1</sup>.

**HRMS** (ESI-TOF): Calcd for C<sub>19</sub>H<sub>18</sub>NaO<sub>4</sub>Si<sup>+</sup> [*M*+Na<sup>+</sup>] requires 361.0867; found 361.0871.

**Mp**: 82–84 °C.

### 5-(4-Fluorophenyl)penta-2,4-diyne-1-yl 3-(trimethylsilyl)propiolate (**S12**)

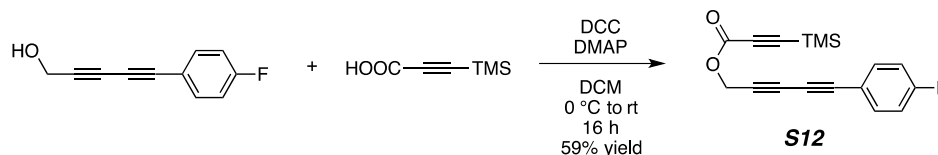

Following general procedure B, 5-(4-fluorophenyl)penta-2,4-diyne-1-ol<sup>[8]</sup> (0.21 g, 1.2 mmol), 3-(trimethylsilyl)propiolic acid (0.20 g, 1.4 mmol), DMAP (15 mg, 0.12 mmol), DCC (0.30 g, 1.4 mmol), and DCM (12 mL) were used to prepare triyne **S12**. Purification of the crude material by MPLC (hexanes:EtOAc 20:1) provided triyne **S12** (0.21 g, 0.71 mmol, 59%) as a white solid.

**<sup>1</sup>H NMR** (500 MHz, CDCl<sub>3</sub>): δ 7.52–7.44 (m, 2H, *H*3), 7.06–6.99 (m, 2H, *H*2), 4.89 (s, 2H, CH<sub>2</sub>O), and 0.25 [s, 9H, Si(CH<sub>3</sub>)<sub>3</sub>].

**<sup>13</sup>C NMR** (126 MHz, CDCl<sub>3</sub>): δ 163.4 (d, *J* = 252 Hz), 152.1, 134.9 (d, *J* = 8.8 Hz), 117.3 (d, *J* = 2.5 Hz), 116.1 (d, *J* = 23 Hz), 96.2, 93.6, 78.3, 75.1, 72.9, 72.0, 53.8, and -0.8.

**<sup>19</sup>F NMR** (470 MHz, CDCl<sub>3</sub>): δ -107.9.

**IR** (neat): 3011, 2963, 2903, 2175, 1721, 1600, 1507, 1370, 1251, 1156, 1110, 978, 866, 821, and 789 cm<sup>-1</sup>.

**HRMS** (ESI-TOF): Calcd for C<sub>17</sub>H<sub>15</sub>FN<sub>2</sub>O<sub>2</sub>Si<sup>+</sup> [M+Na<sup>+</sup>] requires 321.0718; found 321.0707.

**Mp**: 38–39 °C.

### 5-(4-Bromophenyl)penta-2,4-diyne-1-yl 3-(trimethylsilyl)propiolate (**S13**)

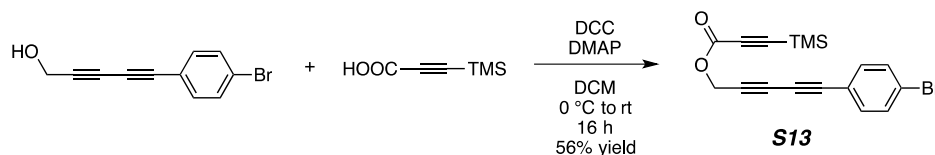

Following general procedure B, 5-(4-bromophenyl)penta-2,4-diyne-1-ol<sup>[9]</sup> (0.24 g, 1.0 mmol), 3-(trimethylsilyl)propiolic acid (0.17 g, 1.2 mmol), DMAP (12 mg, 0.10 mmol), DCC (0.25 g, 1.2 mmol), and DCM (10 mL) were used to prepare triyne **S13**. Purification of the crude material by MPLC (hexanes:EtOAc 20:1) provided triyne **S13** (0.20 g, 0.56 mmol, 56%) as a white solid.

**<sup>1</sup>H NMR** (500 MHz, CDCl<sub>3</sub>): δ 7.47 (nfod, *J* = 8.6 Hz, 2H, *H*2), 7.35 (nfod, *J* = 8.6 Hz, 2H, *H*3), 4.89 (s, 2H, CH<sub>2</sub>O), and 0.26 [s, 9H, Si(CH<sub>3</sub>)<sub>3</sub>].

**<sup>13</sup>C NMR** (126 MHz, CDCl<sub>3</sub>): δ 152.0, 134.2, 132.0, 124.3, 120.2, 96.3, 93.6, 78.2, 75.7, 74.2, 72.0, 53.8, and -0.8.

**IR** (neat): 2998, 2962, 2903, 2174, 2123, 1720, 1585, 1486, 1368, 1252, 1110, 1069, 1010, 866, and 815 cm<sup>-1</sup>.

**HRMS** (ESI-TOF): Calcd for C<sub>17</sub>H<sub>15</sub><sup>79</sup>BrNaO<sub>2</sub>Si<sup>+</sup> [M+Na<sup>+</sup>] requires 380.9917; found 380.9934.

**Mp**: 79–81 °C.



**4-(5-Hydroxypenta-1,3-diyn-1-yl)benzonitrile (S14)**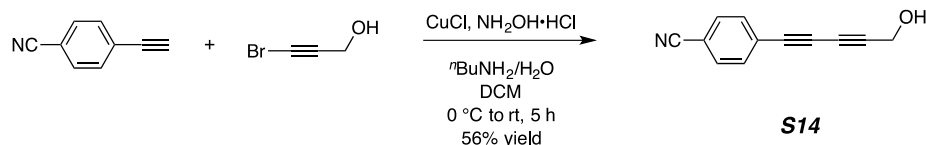

Following general procedure A, 4-ethynylbenzonitrile (0.32 g, 2 mmol), 3-bromoprop-2-yn-1-ol (0.34 g, 2.5 mmol), CuCl (20 mg, 0.2 mmol), *n*-butylamine/H<sub>2</sub>O (v:v, 30:70, 10 mL), and DCM (10 mL) were used to prepare diyne **S14**. Purification of the crude material by flash chromatography (hexanes:EA 2:1) provided **S14** (0.20 g, 1.1 mmol, 56%) as a pale yellow solid.

**<sup>1</sup>H NMR** (500 MHz, CDCl<sub>3</sub>): δ 7.62 (nfod, *J* = 8.6 Hz, 2H, *H*<sub>2</sub>), 7.57 (nfod, *J* = 8.7 Hz, 2H, *H*<sub>3</sub>), 4.44 (s, 2H, CH<sub>2</sub>OH), and 1.69 (br s, 1H, OH).

**<sup>13</sup>C NMR** (126 MHz, CDCl<sub>3</sub>): δ 133.2, 132.2, 126.5, 118.3, 112.8, 83.0, 76.5, 70.0, and 51.8 (one alkyne resonance was not observed in this sparingly CDCl<sub>3</sub>-soluble analyte).

**IR** (neat): 3267, 2998, 2933, 2233, 1602, 1501, 1446, 1309, 1269, 1240, 1096, 1016, 828, and 769 cm<sup>-1</sup>.

**HRMS** (ESI-TOF): Calcd for C<sub>12</sub>H<sub>7</sub>NNaO<sup>+</sup> [*M*+Na<sup>+</sup>] requires 204.0420; found 204.0421.

**Mp**: 151–154 °C.

**5-(4-Cyanophenyl)penta-2,4-diyn-1-yl 3-(trimethylsilyl)propiolate (S15)**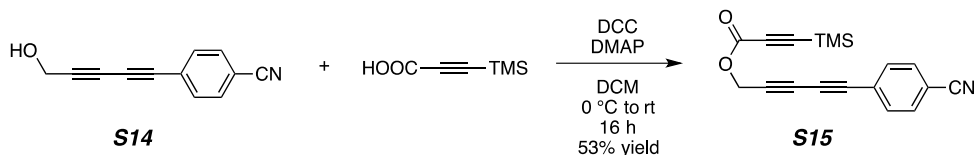

Following general procedure B, propargyl alcohol **S14** (0.18 g, 1.0 mmol), 3-(trimethylsilyl)propiolic acid (0.17 g, 1.2 mmol), DMAP (12 mg, 0.10 mmol), DCC (0.25 g, 1.2 mmol), and DCM (10 mL) were used to prepare triyne **S15**. Purification of the crude material by MPLC (hexanes:EtOAc 9:1) provided triyne **S15** (0.16 g, 0.53 mmol, 53%) as a white solid.

**<sup>1</sup>H NMR** (500 MHz, CDCl<sub>3</sub>): δ 7.62 (nfod, *J* = 8.5 Hz, 2H, *H*<sub>3</sub>), 7.57 (nfod, *J* = 8.5 Hz, 2H, *H*<sub>2</sub>), 4.91 (s, 2H, CH<sub>2</sub>O), and 0.26 [s, 9H, Si(CH<sub>3</sub>)<sub>3</sub>].

**<sup>13</sup>C NMR** (126 MHz, CDCl<sub>3</sub>): δ 152.0, 133.2, 132.2, 126.2, 118.2, 113.0, 96.5, 93.5, 77.4, 77.1, 77.0, 71.4, 53.6, and -0.8.

**IR** (neat): 2998, 2964, 2905, 2229, 2175, 1713, 1604, 1502, 1431, 1371, 1252, 1110, 1019, 981, 942, 865, and 823 cm<sup>-1</sup>.

**HRMS** (ESI-TOF): Calcd for C<sub>18</sub>H<sub>15</sub>NNaO<sub>2</sub>Si<sup>+</sup> [*M*+Na<sup>+</sup>] requires 328.0764; found 328.0779.

**Mp**: 91–93 °C.

### 5-(Triisopropylsilyl)penta-2,4-diyne-1-yl propiolate (**7b**)

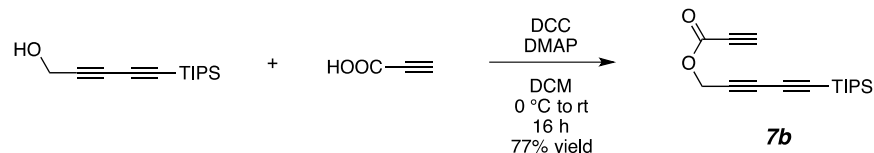

Following general procedure B, 5-(triisopropylsilyl)penta-2,4-diyne-1-ol<sup>[10]</sup> (0.24 g, 1.0 mmol), propiolic acid (93  $\mu\text{L}$ , 1.5 mmol), DMAP (12 mg, 0.10 mmol), DCC (0.25 g, 1.2 mmol), and DCM (10 mL) were used to prepare triyne **7b**. Purification of the crude material by flash chromatography (hexanes:EtOAc 20:1) provided triyne **7b** (0.22 g, 0.76 mmol, 77%) as a pale yellow oil.

**<sup>1</sup>H NMR** (500 MHz,  $\text{CDCl}_3$ ):  $\delta$  4.85 (s, 2H,  $\text{CH}_2\text{O}$ ), 2.96 (s, 1H,  $\equiv\text{CH}$ ), and 1.08 [m, 21H,  $\text{CH}(\text{CH}_3)_2$ ].

**<sup>13</sup>C NMR** (126 MHz,  $\text{CDCl}_3$ ):  $\delta$  151.8, 88.5, 86.5, 76.3, 73.9, 73.0, 68.8, 54.0, 18.6, and 11.3.

**IR** (neat): 3296, 2945, 2867, 2124, 2111, 1725, 1462, 1366, 1206, 996, 966, 882, and 804  $\text{cm}^{-1}$ .

**HRMS** (ESI-TOF): Calcd for  $\text{C}_{17}\text{H}_{24}\text{NaO}_2\text{Si}^+$  [ $\text{M}+\text{Na}^+$ ] requires 311.1438; found 311.1453.

### 5-(Naphthalen-1-yl)penta-2,4-diyne-1-yl 3-(trimethylsilyl)propiolate (**7c**)

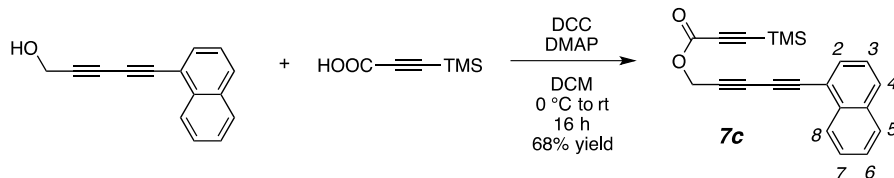

Following general procedure B, 5-(naphthalen-1-yl)penta-2,4-diyne-1-ol<sup>[11]</sup> (0.21 g, 1.0 mmol), 3-(trimethylsilyl)propiolic acid (0.17 g, 1.2 mmol), DMAP (12 mg, 0.10 mmol), DCC (0.25 g, 1.2 mmol), and DCM (10 mL) were used to prepare triyne **7c**. Purification of the crude material by MPLC (hexanes:EtOAc 20:1) provided triyne **7c** (0.23 g, 0.68 mmol, 68%) as a pale yellow solid.

**<sup>1</sup>H NMR** (500 MHz,  $\text{CDCl}_3$ ):  $\delta$  8.28 (d,  $J = 8.3$  Hz, 1H,  $H_8$ ), 7.87 (d,  $J = 8.9$  Hz, 1H,  $H_4$  or  $H_5$ ), 7.85 (d,  $J = 8.9$  Hz, 1H,  $H_5$  or  $H_4$ ), 7.74 (d,  $J = 7.2$  Hz, 1H,  $H_2$ ), 7.58 (ddd,  $J = 8.3, 7.9, 0.9$  Hz, 1H,  $H_7$ ), 7.53 (ddd,  $J = 7.9, 7.9, 0.9$  Hz, 1H,  $H_6$ ), 7.41 (dd,  $J = 7.3, 7.3$  Hz, 1H,  $H_3$ ), 4.95 (s, 2H,  $\text{CH}_2\text{O}$ ), and 0.26 [s, 9H,  $\text{Si}(\text{CH}_3)_3$ ].

**<sup>13</sup>C NMR** (126 MHz,  $\text{CDCl}_3$ ):  $\delta$  152.1, 134.0, 133.1, 132.5, 130.2, 128.6, 127.5, 126.9, 126.0, 125.2, 118.8, 96.2, 93.7, 77.8, 77.6, 76.1, 72.3, 54.0, and -0.8.

**IR** (neat): 3060, 2963, 2902, 2175, 1713, 1585, 1505, 1428, 1365, 1253, 1068, 1012, 874, 826, and 795  $\text{cm}^{-1}$ .

**HRMS** (ESI-TOF): Calcd for  $\text{C}_{21}\text{H}_{18}\text{NaO}_2\text{Si}^+$  [ $\text{M}+\text{Na}^+$ ] requires 353.0968; found 353.0985.

**Mp**: 25–28  $^\circ\text{C}$ .

**3-Mesitylprop-2-yn-1-yl propiolate (7e)**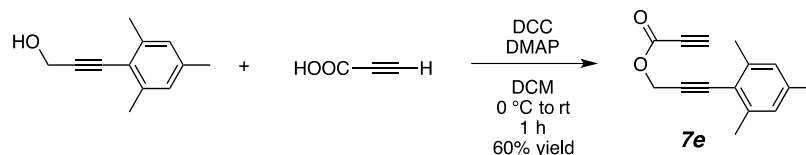

Following general procedure B, 3-mesitylprop-2-yn-1-ol<sup>[12]</sup> (0.10 g, 0.6 mmol), propiolic acid (70 mg, 1.0 mmol), DMAP (7.3 mg, 0.060 mmol), DCC (0.21 g, 1.0 mmol), and DCM (10 mL) were used to prepare diyne **7e**. Purification of the crude material by MPLC (hexanes:EtOAc 30:1) provided diyne **7e** (82 mg, 0.36 mmol, 60%) as a clear oil.

**<sup>1</sup>H NMR** (500 MHz, CDCl<sub>3</sub>): δ 6.85 (s, 2H, Ar*H*), 5.08 (s, 2H, CH<sub>2</sub>O), 2.93 (s, 1H, ≡CH), 2.37 (s, 6H, Ar*ortho*CH<sub>3</sub>), and 2.27 (s, 3H, Ar*para*CH<sub>3</sub>).

**<sup>13</sup>C NMR** (126 MHz, CDCl<sub>3</sub>): δ 152.2, 140.9, 138.6, 127.8, 118.7, 89.0, 85.6, 75.6, 74.3, 54.9, 21.5, and 21.0.

**IR** (neat): 3291, 2922, 2857, 2233, 2120, 1720, 1610, 1478, 1436, 1366, 1209, 1019, 990, 938, and 827 cm<sup>-1</sup>.

**HRMS** (ESI-TOF): Calcd for C<sub>15</sub>H<sub>14</sub>NaO<sub>2</sub><sup>+</sup> [M+Na<sup>+</sup>] requires 249.0886; found 249.0891.

**1,12-Diphenyldodeca-1,3,9,11-tetrayne (30)**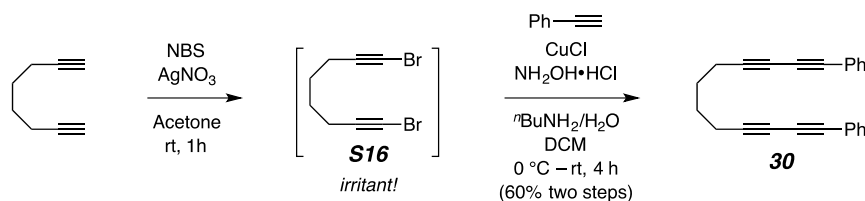

To a stirred solution of 1,7-octadiyne (133  $\mu$ L, 1.0 mmol) in acetone (10 mL) was added *N*-bromosuccinimide (0.43 g, 2.4 mmol) and silver nitrate (34 mg, 0.20 mmol). The solution quickly turned into a suspension, which was stirred at room temperature for 1 hour. The reaction mixture was then quenched by addition of hexanes (20 mL), and the suspension was passed through Celite<sup>®</sup>. The filtrate was concentrated to afford the dibromodiyne **S19**, which was used immediately in the subsequent step.

**CAUTION:** Dibromodiyne **S16** is a strong skin irritant! Avoid contact.

Following general procedure A, the crude dibromodiyne **S16** (ca. 1.0 mmol), phenyl acetylene (0.33 mL, 3.0 mmol), CuCl (20 mg, 0.20 mmol), *n*-butylamine/H<sub>2</sub>O (v:v, 30:70, 5 mL), and DCM (5 mL) were used to prepare tetrayne **30**. Purification of the crude material by direct recrystallization (hexanes) provided tetrayne **30** (0.18 g, 0.60 mmol, 60%, two steps) as a white solid.

**<sup>1</sup>H NMR** (500 MHz, CDCl<sub>3</sub>): δ 7.51–7.46 (nfom, 4H, PhH<sub>o</sub>), 7.36–7.28 (m, 6H, PhH<sub>m+p</sub>), 2.45–2.39 (nfom, 4H, ≡CCH<sub>2</sub>), and 1.77–1.71 (nfom, 4H, CH<sub>2</sub>CH<sub>2</sub>).

**<sup>13</sup>C NMR** (126 MHz, CDCl<sub>3</sub>): δ 132.7, 129.0, 128.5, 122.2, 84.0, 75.1, 74.4, 65.8, 27.4, and 19.3.

**IR** (neat): 2955, 2934, 2901, 2866, 2242, 2175, 2157, 1592, 1489, 1441, 1333, 1295, 906, and 753 cm<sup>-1</sup>.

**HRMS** (ESI-TOF): Calcd for C<sub>24</sub>H<sub>18</sub>Ag<sup>+</sup> [M+Ag<sup>+</sup>] requires 413.0454; found 413.0458 (measurement done using a DCM/MeOH solution of **30** that had been doped with a crystal of AgNO<sub>3</sub>).

**Mp**: 101–104 °C.

• Experimental details and characterization data for the cyclobutadiene-derived products

**5-(*tert*-Butyl)-6-(3,3-dimethylbut-1-yn-1-yl)naphtho[1,2-*c*:7,8-*c'*]difuran-3,8(1*H*,10*H*)-dione (8 ≡ 13a)**

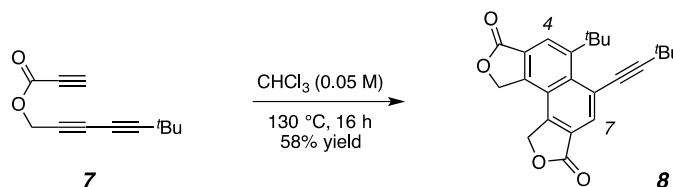

Following general procedure C, the naphthalene derivative **8** was prepared from triyne **7** (94 mg, 0.50 mmol) in  $\text{CHCl}_3$  (10 mL). The crude product was purified by MPLC (hexanes:EtOAc 3:1) to yield **8** (55 mg, 0.29 mmol, 58%) as a white solid. Single crystal suitable for X-ray diffraction analysis was obtained by vapor diffusion method, in which *n*-pentane was slowly vaporized and diffused into a DCM solution of **8** at ca.  $-20\text{ }^\circ\text{C}$ .

**$^1\text{H}$  NMR** (500 MHz,  $\text{CDCl}_3$ ):  $\delta$  8.37 (s, 1H, *H*4), 8.30 (s, 1H, *H*7), 5.63 (s, 2H,  $\text{CH}_2\text{O}$ ), 5.60 (s, 2H,  $\text{CH}_2\text{O}$ ), 1.82 [s, 9H,  $\text{ArC}(\text{CH}_3)_3$ ], and 1.39 [s, 9H,  $\equiv\text{CC}(\text{CH}_3)_3$ ].

**$^{13}\text{C}$  NMR** (126 MHz,  $\text{CDCl}_3$ ):  $\delta$  170.6, 169.7, 152.3, 145.2, 144.1, 137.9, 134.3, 125.2, 124.7, 124.1, 123.3, 123.2, 107.9, 83.7, 69.8, 69.5, 38.0, 34.5, 30.5, and 28.8.

**IR** (neat): 3020, 2968, 2930, 2870, 2204, 1762, 1459, 1411, 1365, 1239, 1120, 1119, 979, 909, and  $764\text{ cm}^{-1}$ .

**HRMS** (ESI-TOF): Calcd for  $\text{C}_{24}\text{H}_{24}\text{NaO}_4^+$  [ $\text{M}+\text{Na}^+$ ] requires 399.1567; found 399.1555.

**Mp**: 234–242  $^\circ\text{C}$  (with decomposition  $>$  ca. 220  $^\circ\text{C}$ ).

**5-(3-((*tert*-Butyldimethylsilyl)oxy)-3-methylbut-1-yn-1-yl)-6-(2-((*tert*-butyldimethylsilyl)oxy)propan-2-yl)naphtho[1,2-*c*:7,8-*c'*]difuran-3,8(1*H*,10*H*)-dione (13b)**

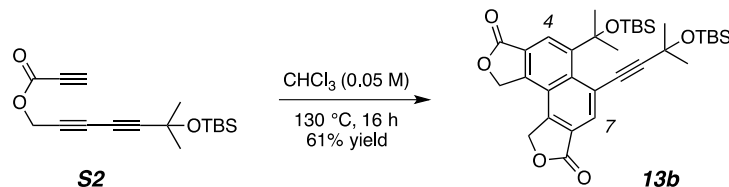

Following general procedure C, naphthalene **13b** was prepared from triyne **S2** (100 mg, 0.33 mmol) in  $\text{CHCl}_3$  (6.6 mL). The crude product was purified by MPLC (hexanes:EtOAc 3:1) to obtain the naphthalene derivative **13b** (61 mg, 0.10 mmol, 61%) as a white solid.

**$^1\text{H}$  NMR** (500 MHz,  $\text{CDCl}_3$ ):  $\delta$  8.93 (s, 1H, *H*4), 8.34 (s, 1H, *H*7), 5.66 (s, 2H,  $\text{CH}_2\text{O}$ ), 5.62 (s, 2H,  $\text{CH}_2\text{O}$ ), 2.19 [s, 6H,  $\text{C}(\text{CH}_3)_2$ ], 1.65 [s, 6H,  $\text{C}(\text{CH}_3)_2$ ], 1.00 [s, 9H,  $\text{SiC}(\text{CH}_3)_3$ ], 0.90 [s, 9H,  $\text{SiC}(\text{CH}_3)_3$ ], 0.19 [s, 6H,  $\text{Si}(\text{CH}_3)_2$ ], and 0.16 [s, 6H,  $\text{Si}(\text{CH}_3)_2$ ].

$^{13}\text{C}$  NMR (126 MHz,  $\text{CDCl}_3$ ):  $\delta$  170.0, 169.3, 152.0, 145.9, 144.4, 135.5, 133.7, 124.4, 124.3, 124.2, 123.3, 123.2, 103.5, 85.2, 77.4, 69.6, 69.2, 67.3, 34.0, 32.3, 26.1, 25.6, 18.5, 17.9, -1.7, and -2.7.

IR (neat): 2960, 2932, 2893, 2202, 1770, 1473, 1462, 1410, 1367, 1255, 1218, 1159, 1117, 1024, 1005, 836, and 774  $\text{cm}^{-1}$ .

HRMS (ESI-TOF): Calcd for  $\text{C}_{34}\text{H}_{48}\text{NaO}_6\text{Si}_2^+$  [ $\text{M}+\text{Na}^+$ ] requires 631.2887; found 631.2869.

Mp: 207–209  $^\circ\text{C}$ .

( $\pm$ )-5-(3-((*tert*-Butyldimethylsilyloxy)but-1-yn-1-yl)-6-(1-((*tert*-butyldimethylsilyloxy)ethyl)naphtho[1,2-*c*:7,8-*c'*]difuran-3,8(1H,10H)-dione (13c, a 1:1 mixture of *like* and *unlike* diastereomers)

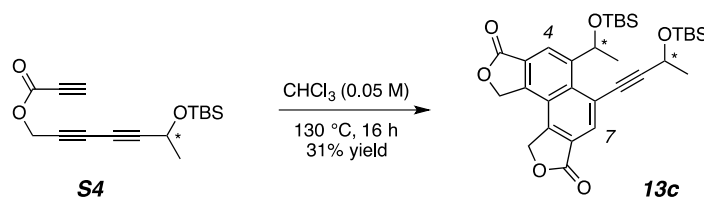

Following general procedure C, naphthalene **13c** was prepared from triyne **S4** (100 mg, 0.34 mmol) in  $\text{CHCl}_3$  (6.8 mL). The crude product was purified by MPLC (hexanes:EtOAc 3:1) to yield the naphthalene derivative **13c** (31 mg, 0.053 mmol, 31%) as a pale yellow solid.

$^1\text{H}$  NMR (500 MHz,  $\text{CDCl}_3$ ):  $\delta$  8.70 (s, 0.5H, *H4*), 8.69 (s, 0.5H, *H4*), 8.29 (s, 0.5H, *H7*), 8.28 (s, 0.5H, *H7*), 6.98 (q,  $J = 6.0$  Hz, 0.5H, ArCH), 6.94 (q,  $J = 6.0$  Hz, 0.5H, ArCH), 5.66 (s, 2H,  $\text{CH}_2\text{O}$ ), 5.64 (s, 2H,  $\text{CH}_2\text{O}$ ), 4.88<sup>+</sup> (q,  $J = 6.5$  Hz, 0.5H,  $\equiv\text{CCH}$ ), 4.88<sup>-</sup> (q,  $J = 6.5$  Hz, 0.5H,  $\equiv\text{CCH}$ ), 1.61 (d,  $J = 6.5$  Hz, 1.5H, ArCHCH<sub>3</sub>), 1.60 (d,  $J = 6.5$  Hz, 1.5H, ArCHCH<sub>3</sub>), 1.57 (d,  $J = 6.0$  Hz, 3H,  $\equiv\text{CCHCH}_3$ ), 0.95 [s, 4.5H,  $\text{SiC}(\text{CH}_3)_3$ ], 0.94 [s, 4.5H,  $\text{SiC}(\text{CH}_3)_3$ ], 0.92<sup>+</sup> [s, 4.5H,  $\text{SiC}(\text{CH}_3)_3$ ], 0.92<sup>-</sup> [s, 4.5H,  $\text{SiC}(\text{CH}_3)_3$ ], 0.184 [s, 1.5H,  $\text{Si}(\text{CH}_3)_2$ ], 0.182 [s, 1.5H,  $\text{Si}(\text{CH}_3)_2$ ], 0.179 [s, 3H,  $\text{Si}(\text{CH}_3)_2$ ], 0.13 [s, 1.5H,  $\text{Si}(\text{CH}_3)_2$ ], 0.12 [s, 1.5H,  $\text{Si}(\text{CH}_3)_2$ ], -0.00 [s, 1.5H,  $\text{Si}(\text{CH}_3)_2$ ], and -0.01 [s, 1.5H,  $\text{Si}(\text{CH}_3)_2$ ].

$^{13}\text{C}$  NMR (126 MHz,  $\text{CDCl}_3$ ):  $\delta$  170.0, 169.3, 150.1<sup>+</sup>, 150.1<sup>-</sup>, 145.6, 145.5, 143.9<sup>+</sup>, 143.9<sup>-</sup>, 134.5<sup>+</sup>, 134.5<sup>-</sup>, 132.5, 132.2, 125.0, 123.7<sup>+</sup>, 123.7<sup>-</sup>, 123.0, 122.9<sup>+</sup>, 122.9<sup>-</sup>, 122.8, 122.4, 99.8, 99.7, 83.3<sup>+</sup>, 83.3<sup>-</sup>, 69.5, 69.2, 67.1, 66.9, 59.6, 29.0, 28.9, 25.9, 25.8, 25.2, 25.1, 18.23, 18.19, 18.18, -4.47, -4.49, -4.54, -4.7, -4.8, and -4.9.

IR (neat): 2955, 2931, 2890, 2208, 1767, 1471, 1463, 1417, 1367, 1255, 1116, 1093, 1021, 836, and 778  $\text{cm}^{-1}$ .

HRMS (ESI-TOF): Calcd for  $\text{C}_{32}\text{H}_{44}\text{NaO}_6\text{Si}_2^+$  [ $\text{M}+\text{Na}^+$ ] requires 603.2574; found 603.2549.

Mp: 70–78  $^\circ\text{C}$  (mixture of diastereomers).

**5-Cyclopropyl-6-(cyclopropylethynyl)naphtho[1,2-c:7,8-c']difuran-3,8(1H,10H)-dione (13d) and 4-Cyclopropyl-9-(cyclopropylethynyl)-3,8-dihydronaphtho[1,2-c:5,6-c']difuran-1,6-dione (13d')**

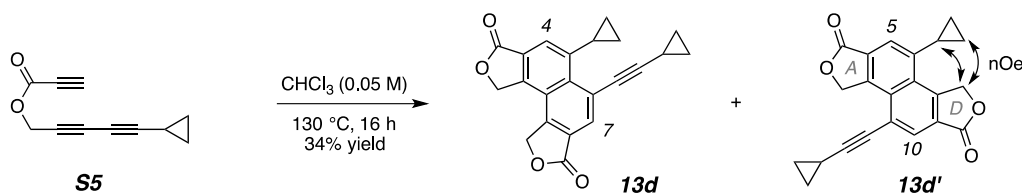

Following general procedure C, naphthalenes **13d** and **13d'** were prepared from triyne **S5** (34 mg, 0.20 mmol) in  $\text{CHCl}_3$  (4.0 mL). The crude product was purified by MPLC (hexanes:EtOAc 4:1) to obtain a mixture of coeluting naphthalene derivatives **13d** and **13d'** (12 mg, 0.035 mmol, 34%, 8:1 mixture) as a white solid.

**Data for 13d (from the mixture)**

**$^1\text{H NMR}$**  (500 MHz,  $\text{CDCl}_3$ ):  $\delta$  8.20 (s, 1H, *H4*), 7.86 (s, 1H, *H7*), 5.59 (s, 2H,  $\text{CH}_2\text{O}$ ), 5.57 (s, 2H,  $\text{CH}_2\text{O}$ ), 3.17 (tt,  $J = 8.2, 5.7$  Hz, 1H, ArCH), 1.55 (tt,  $J = 8.4, 4.9$  Hz, 1H,  $\equiv\text{CCH}$ ), 1.19 [nfom, 2H, ArCH( $\text{CH}_{\text{cis}}\text{H}_{\text{trans}}-\text{CH}_{\text{cis}}\text{H}_{\text{trans}}$ )], 0.98 [nfom, 2H,  $\equiv\text{CCH}(\text{CH}_{\text{cis}}\text{H}_{\text{trans}}-\text{CH}_{\text{cis}}\text{H}_{\text{trans}})$ ], 0.92 [nfom, 2H, ArCH( $\text{CH}_{\text{cis}}\text{H}_{\text{trans}}-\text{CH}_{\text{cis}}\text{H}_{\text{trans}}$ )], and 0.85 [nfom, 2H,  $\equiv\text{CCH}(\text{CH}_{\text{cis}}\text{H}_{\text{trans}}-\text{CH}_{\text{cis}}\text{H}_{\text{trans}})$ ].

**$^{13}\text{C NMR}$**  (126 MHz,  $\text{CDCl}_3$ ):  $\delta$  170.3, 169.6, 145.3, 144.2, 143.6, 139.1, 131.8, 125.3, 124.6, 124.0, 123.2, 123.1, 102.6, 76.8, 69.5, 69.4, 18.1, 10.4, 8.7, and 1.0.

**Data for 13d' (from the mixture)**

**$^1\text{H NMR}$**  (500 MHz,  $\text{CDCl}_3$ ):  $\delta$  8.09 (s, 1H, *H5*), 7.85 (s, 1H, *H10*), 6.09 (s, 2H,  $\text{CH}_2\text{-ringD O}$ ), 5.99 (s, 2H,  $\text{CH}_2\text{-ringA O}$ ), 2.27 (tt,  $J = 8.0, 5.6$  Hz, 1H, ArCH), 1.63 (tt,  $J = 8.4, 5.0$  Hz, 1H,  $\equiv\text{CCH}$ ), 1.23 [nfom, 2H, ArCH( $\text{CH}_{\text{cis}}\text{H}_{\text{trans}}-\text{CH}_{\text{cis}}\text{H}_{\text{trans}}$ )], 1.05 [nfom, 2H,  $\equiv\text{CCH}(\text{CH}_{\text{cis}}\text{H}_{\text{trans}}-\text{CH}_{\text{cis}}\text{H}_{\text{trans}})$ ], 1.02 [nfom, 2H, ArCH( $\text{CH}_{\text{cis}}\text{H}_{\text{trans}}-\text{CH}_{\text{cis}}\text{H}_{\text{trans}}$ )], and 1.00–0.95 [overlapped, 2H,  $\equiv\text{CCH}(\text{CH}_{\text{cis}}\text{H}_{\text{trans}}-\text{CH}_{\text{cis}}\text{H}_{\text{trans}})$ ].

**nOe**: The interactions indicated on structure **13d'** for pairs of resonances of the minor isomer led to the assignment of regiochemical orientation for each of the two constitutional isomers.

**$^{13}\text{C NMR}$**  (126 MHz,  $\text{CDCl}_3$ ):  $\delta$  170.9, 170.2, 145.8, 145.4, 142.8, 133.0, 132.2, 128.0, 126.3, 126.1, 124.1, 122.6, 101.7, 74.8, 72.2, 71.7, 16.1, 8.8, 8.6, and 0.6.

**IR** (neat): 2998, 2943, 2213, 1759, 1424, 1372, 1345, 1214, 1123, 1106, 1016, 977, 844, and 763  $\text{cm}^{-1}$  (obtained from the mixture).

**HRMS** (ESI-TOF): Calcd for  $\text{C}_{22}\text{H}_{16}\text{NaO}_4^+$  [ $\text{M}+\text{Na}^+$ ] requires 367.0941; found 367.0923 (from the mixture).

**Mp**: 238–248 °C (mixture of constitutional isomers).

**5-(Trimethylsilyl)-6-((trimethylsilyl)ethynyl)naphtho[1,2-c:7,8-c']difuran-3,8(1H,10H)-dione (13e)**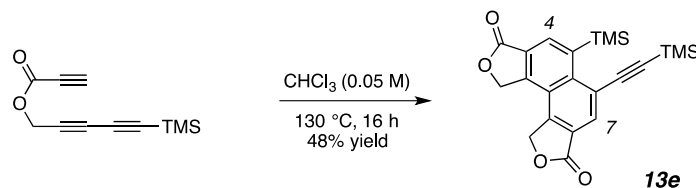

Following general procedure C, naphthalene **13e** was prepared from 5-(trimethylsilyl)penta-2,4-diyne-1-yl propionate<sup>[13]</sup> (31 mg, 0.15 mmol) in  $\text{CHCl}_3$  (3.0 mL). The crude product was purified by MPLC (hexanes:EtOAc 4:1) to obtain the naphthalene derivative **13e** (15 mg, 0.037 mmol, 48%) as a white solid.

**$^1\text{H}$  NMR** (500 MHz,  $\text{CDCl}_3$ ):  $\delta$  8.47 (s, 1H, *H*4 or *H*7), 8.41 (s, 1H, *H*7 or *H*4), 5.65 (s, 2H,  $\text{CH}_2\text{O}$ ), 5.62 (s, 2H,  $\text{CH}_2\text{O}$ ), 0.62 [s, 9H,  $\text{ArSi}(\text{CH}_3)_3$ ], and 0.33 [s, 9H,  $\equiv\text{CSi}(\text{CH}_3)_3$ ].

**$^{13}\text{C}$  NMR** (126 MHz,  $\text{CDCl}_3$ ):  $\delta$  170.2, 169.5, 146.8, 145.8, 144.3, 142.8, 133.9, 133.7, 126.2, 123.9, 123.8, 122.9, 107.5, 106.2, 69.6, 69.3, 4.2, and -0.2.

**IR** (neat): 2958, 2899, 2145, 1764, 1607, 1461, 1406, 1362, 1249, 1224, 1108, 1017, 942, 845, and  $757\text{ cm}^{-1}$ .

**HRMS** (ESI-TOF): Calcd for  $\text{C}_{22}\text{H}_{24}\text{NaO}_4\text{Si}_2^+$  [ $\text{M}+\text{Na}^+$ ] requires 431.1105; found 431.1085.

**Mp**: 254–258  $^\circ\text{C}$  (with decomposition > ca. 220  $^\circ\text{C}$ ).

**5-(*tert*-Butyldimethylsilyl)-6-((*tert*-butyldimethylsilyl)ethynyl)naphtho[1,2-c:7,8-c']difuran-3,8(1H,10H)-dione (13f)**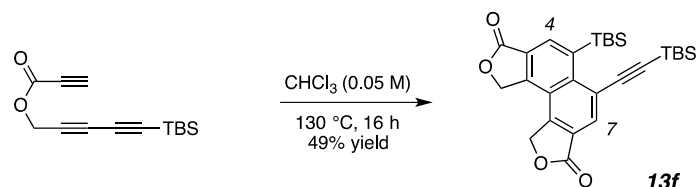

Following general procedure C, the naphthalene derivative **13f** was prepared from 5-(*tert*-butyldimethylsilyl)penta-2,4-diyne-1-yl propionate<sup>[13]</sup> (37 mg, 0.15 mmol) in  $\text{CHCl}_3$  (3.0 mL). The crude product was purified by MPLC (hexanes:EtOAc 4:1) to obtain **13f** (18 mg, 0.037 mmol, 49%) as a pale yellow solid.

**$^1\text{H}$  NMR** (500 MHz,  $\text{CDCl}_3$ ):  $\delta$  8.56 (s, 1H, *H*4), 8.36 (s, 1H, *H*7), 5.64 (s, 2H,  $\text{CH}_2\text{O}$ ), 5.62 (s, 2H,  $\text{CH}_2\text{O}$ ), 1.10 [s, 9H,  $\text{SiC}(\text{CH}_3)_3$ ], 1.06 [s, 9H,  $\text{SiC}(\text{CH}_3)_3$ ], 0.64 [s, 6H,  $\text{ArSi}(\text{CH}_3)_2$ ], and 0.25 [s, 6H,  $\equiv\text{CSi}(\text{CH}_3)_2$ ].



$^{13}\text{C}$  NMR (126 MHz,  $\text{CDCl}_3$ ):  $\delta$  170.1, 169.5, 146.6, 145.9, 143.1, 142.8, 134.0, 133.9, 126.5, 123.8, 123.3, 123.2, 107.4, 106.5, 69.6, 69.3, 28.5, 26.5, 19.4, 17.4, 0.9, and -4.7.

IR (neat): 2953, 2931, 2885, 2858, 2141, 1765, 1606, 1462, 1404, 1361, 1251, 1220, 1108, 1024, 1019, 910, 823, and 776  $\text{cm}^{-1}$ .

HRMS (ESI-TOF): Calcd for  $\text{C}_{28}\text{H}_{36}\text{NaO}_4\text{Si}_2^+$  [ $\text{M}+\text{Na}^+$ ] requires 515.2044; found 515.2048.

Mp: 242–248  $^\circ\text{C}$ .

### 5-(Triisopropylsilyl)-6-((triisopropylsilyl)ethynyl)naphtho[1,2-c:7,8-c']difuran-3,8(1H,10H)-dione (**13g**)

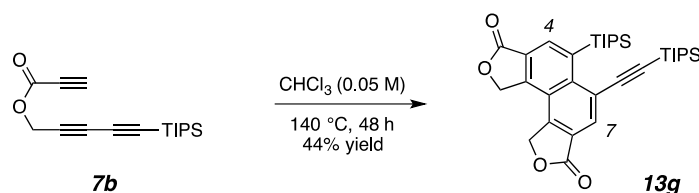

Following general procedure C, the naphthalene derivative **13g** was prepared from triyne **7b** (43 mg, 0.15 mmol) in  $\text{CHCl}_3$  (3.0 mL). The crude product was purified by MPLC (hexanes:EtOAc 4:1) to obtain **13g** (19 mg, 0.033 mmol, 44%) as an amorphous yellow solid.

$^1\text{H}$  NMR (500 MHz,  $\text{CDCl}_3$ ):  $\delta$  8.53 (s, 1H, *H*<sub>4</sub>), 8.39 (s, 1H, *H*<sub>7</sub>), 5.64 (s, 2H,  $\text{CH}_2\text{O}$ ), 5.63 (s, 2H,  $\text{CH}_2\text{O}$ ), 2.21 {sep,  $J = 7.5$  Hz, 3H,  $\text{ArSi}[(\text{CH})(\text{CH}_3)_2]_3$ }, 1.21 {sep,  $J = 6.0$  Hz, 3H,  $\equiv\text{CSi}[(\text{CH})(\text{CH}_3)_2]_3$ }, 1.17 {d,  $J = 6.0$  Hz, 18H,  $\equiv\text{CSi}[\text{CH}(\text{CH}_3)_2]_3$ }, and 1.13 {d,  $J = 7.5$  Hz, 18H,  $\text{ArSi}[\text{CH}(\text{CH}_3)_2]_3$ }.

$^{13}\text{C}$  NMR (126 MHz,  $\text{CDCl}_3$ ):  $\delta$  170.2, 169.5, 146.6, 145.9, 143.1, 140.8, 134.8, 134.2, 126.7, 123.7, 123.5, 123.2, 108.7, 105.4, 69.6, 69.3, 20.0, 18.8, 14.6, and 11.8.

IR (neat): 2944, 2890, 2866, 2132, 1766, 1607, 1460, 1360, 1248, 1219, 1108, 1019, 980, 909, 880, and 759  $\text{cm}^{-1}$ .

HRMS (ESI-TOF): Calcd for  $\text{C}_{34}\text{H}_{48}\text{NaO}_4\text{Si}_2^+$  [ $\text{M}+\text{Na}^+$ ] requires 599.2983; found 599.2970.

### (±)-5-(*tert*-Butyl)-6-(3,3-dimethylbut-1-yn-1-yl)-4,7-bis(trimethylsilyl)naphtho[1,2-c:7,8-c']difuran-3,8(1H,10H)-dione (**13h**)

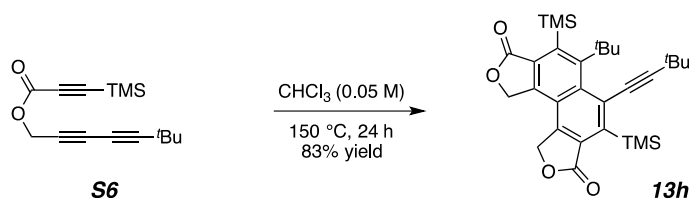



**IR** (neat): 2951, 2897, 2189, 1760, 1490, 1400, 1357, 1192, 1112, 1034, 1000, 909, 842, and 758  $\text{cm}^{-1}$ .

**HRMS** (ESI-TOF): Calcd for  $\text{C}_{34}\text{H}_{32}\text{NaO}_4\text{Si}_2^+$  [ $\text{M}+\text{Na}^+$ ] requires 583.1731; found 583.1739.

**Mp**: 164–170  $^{\circ}\text{C}$ .

#### Data for **13i'**

**$^1\text{H}$  NMR** (500 MHz,  $\text{CDCl}_3$ ):  $\delta$  7.65–7.62 (nfom, 2H,  $\equiv\text{CPh}_{ortho}$ ), 7.60 (tt,  $J = 7.5, 1.3$  Hz, 1H,  $\text{ArPh}_{para}$ ), 7.51 (dd,  $J = 7.8, 7.8$  Hz, 2H,  $\text{ArPh}_{meta}$ ), 7.51–7.46 (m, 3H,  $\equiv\text{CPh}_{meta+para}$ ), 7.34 (dd,  $J = 7.9, 1.2$  Hz, 2H,  $\text{ArPh}_{ortho}$ ), 6.24 (s, 2H,  $\text{CH}_2\text{-ringAO}$ ), 4.33 (s, 2H,  $\text{CH}_2\text{-ringDO}$ ), 0.57 [s, 9H,  $\text{Ar}_{ringC}\text{-Si}(\text{CH}_3)_3$ ], and 0.02 [s, 9H,  $\text{Ar}_{ringB}\text{-Si}(\text{CH}_3)_3$ ].

**nOe**: The interactions indicated on structure **15** for pairs of resonances of the minor isomer led to the assignment of regiochemical orientation for each of the two constitutional isomers.

**$^{13}\text{C}$  NMR** (126 MHz,  $\text{CDCl}_3$ ):  $\delta$  171.2, 170.6, 148.4, 146.7, 146.4, 143.7, 141.3, 132.1, 131.6, 131.5, 131.4, 131.3, 131.1, 130.6, 129.9, 129.8, 129.2, 128.8, 128.7, 122.3, 100.1, 91.1, 71.6, 69.7, 2.2, and 1.6.

**IR** (neat): 3060, 2951, 2896, 2203, 1764, 1492, 1443, 1379, 1347, 1247, 1176, 1111, 1041, 1000, 950, 843, and 757  $\text{cm}^{-1}$ .

**HRMS** (ESI-TOF): Calcd for  $\text{C}_{34}\text{H}_{32}\text{NaO}_4\text{Si}_2^+$  [ $\text{M}+\text{Na}^+$ ] requires 583.1731; found 583.1747.

**Mp**: 235–240  $^{\circ}\text{C}$ .

#### ( $\pm$ )-5-(*o*-Tolyl)-6-(*o*-tolylethynyl)-4,7-bis(trimethylsilyl)naphtho[1,2-*c*:7,8-*c'*]difuran-3,8(1H,10H)-dione (**13j**)

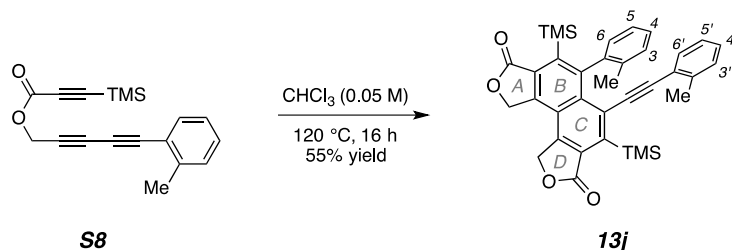

Following general procedure C, the naphthalene derivative **13j** was prepared from triyne **58** (20 mg, 0.067 mmol) in  $\text{CHCl}_3$  (1.3 mL). The crude product was purified by MPLC (hexanes:EtOAc 4:1) to yield **13j** (11 mg, 0.019 mmol, 55%) as a pale yellow solid. A small amount of the minor regioisomer (see **13i'**, above, for characterization of an analogous minor isomer) was observed by analysis of the  $^1\text{H}$  NMR spectrum of the crude product mixture (rr = 10:1).

**$^1\text{H}$  NMR** (500 MHz,  $\text{CDCl}_3$ ):  $\delta$  7.18 (ddd,  $J = 7.5, 7.5, 1.2$  Hz, 1H,  $H_5$ ), 7.15 (dd,  $J = 7.5, 1.2$  Hz, 1H,  $H_3$ ), 7.10 (d,  $J = 7.6$  Hz, 1H,  $H_6$ ), 7.07 (dd,  $J = 7.7, 7.7$  Hz, 1H,  $H_4$ ), 7.04 (d,  $J = 7.5$  Hz, 1H,  $H_6'$ ), 6.99 (dd,  $J = 7.5, 7.5, 1.2$  Hz, 1H,  $H_4'$ ), 6.95 (dd,  $J = 7.5, 1.2$  Hz, 1H,  $H_3'$ ), 6.94 (ddd,  $J =$

7.4, 7.4, 1.4 Hz, 1H,  $H5'$ ), 5.66 (d,  $J = 15.4$  Hz, 1H,  $CH_aH_bO$ ), 5.64 (d,  $J = 15.7$  Hz, 1H,  $CH_a'H_b'O$ ), 5.63 (d,  $J = 15.5$  Hz, 1H,  $CH_aH_bO$ ), 5.62 (d,  $J = 15.9$  Hz, 1H,  $CH_a'H_b'O$ ), 2.12 (s, 3H,  $\equiv CPhCH_3$ ), 1.97 (s, 3H,  $ArPhCH_3$ ), 0.41 [s, 9H,  $Ar_{ringC}-Si(CH_3)_3$ ], and -0.04 [s, 9H,  $Ar_{ringB}-Si(CH_3)_3$ ].

$^{13}C$  NMR (126 MHz,  $CDCl_3$ ):  $\delta$  170.8, 170.2, 149.4, 147.4, 144.4, 143.7, 141.7, 141.2, 139.2, 138.3, 136.1, 132.4, 132.3, 131.4, 130.0, 129.7, 129.5, 129.4, 129.0, 128.3, 125.8, 125.1, 123.7, 122.7, 106.3, 92.7, 68.79, 68.76, 20.8, 20.6, 1.6, and 1.4.

IR (neat): 2950, 2899, 2871, 2194, 1760, 1486, 1457, 1397, 1357, 1247, 1189, 1111, 1036, 1000, 909, 842, and 758  $cm^{-1}$ .

HRMS (ESI-TOF): Calcd for  $C_{36}H_{36}NaO_4Si_2^+$  [ $M+Na^+$ ] requires 611.2044; found 611.2027.

Mp: 118–122  $^{\circ}C$ .

### 5-(4-Methoxyphenyl)-6-((4-methoxyphenyl)ethynyl)-4,7-bis(trimethylsilyl)naphtho[1,2-c:7,8-c']difuran-3,8(1H,10H)-dione (**13k**)

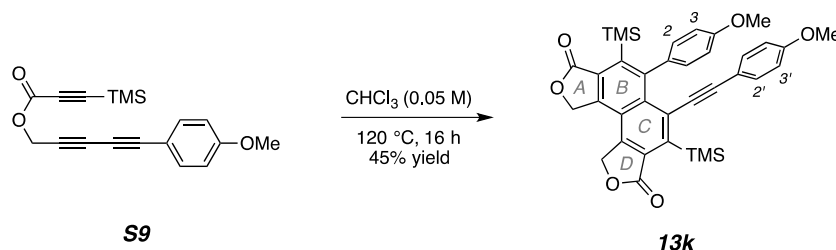

Following general procedure C, the naphthalene derivative **13k** was prepared from triyne **9** (47 mg, 0.15 mmol) in  $CHCl_3$  (3.0 mL). The crude product was purified by MPLC (hexanes: EtOAc 4:1) to yield **13k** (22 mg, 0.033 mmol, 47%, contained 3 wt% EtOAc based on analysis of the  $^1H$  NMR spectrum, 45% corrected yield) as a yellow amorphous solid. A small amount of the minor regioisomer (see **13i'**, above, for characterization of an analogous minor isomer) was observed by analysis of the  $^1H$  NMR spectrum of the crude product mixture (rr = 9:1).

$^1H$  NMR (500 MHz,  $CDCl_3$ ):  $\delta$  7.28 (nfod,  $J = 8.6$  Hz, 2H,  $H2$ ), 7.00 (nfod,  $J = 8.8$  Hz, 2H,  $H2'$ ), 6.83 (nfod,  $J = 8.6$  Hz, 2H,  $H3$ ), 6.78 (nfod,  $J = 8.8$  Hz, 2H,  $H3'$ ), 5.62 (s, 2H,  $CH_2O$ ), 5.60 (s, 2H,  $CH_2O$ ), 3.81 (s, 3H,  $ArOCH_3$ ), 3.65 (s, 3H,  $ArOCH_3$ ), 0.47 [s, 9H,  $Ar_{ringC}-Si(CH_3)_3$ ], and 0.02 [s, 9H,  $Ar_{ringB}-Si(CH_3)_3$ ].

$^{13}C$  NMR (126 MHz,  $CDCl_3$ ):  $\delta$  171.0, 170.3, 160.0, 159.6, 150.1, 146.9, 143.8, 143.1, 141.2, 137.4, 135.2, 133.3, 133.2, 132.3, 129.6, 128.8, 122.8, 116.1, 114.0, 113.8, 108.4, 89.4, 68.8, 68.7, 55.4, 55.2, 1.7, and 1.5.

IR (neat): 2997, 2952, 2899, 2837, 2184, 1759, 1605, 1510, 1462, 1400, 1358, 1289, 1174, 1112, 1033, 1000, 909, 842, and 766  $cm^{-1}$ .

HRMS (ESI-TOF): Calcd for  $C_{36}H_{36}NaO_6Si_2^+$  [ $M+Na^+$ ] requires 643.1943; found 643.1946.

**Methyl 4-((6-(4-(Methoxycarbonyl)phenyl)-3,8-dioxo-4,7-bis(trimethylsilyl)-1,3,8,10-tetrahydronaphtho[1,2-c:7,8-c']difuran-5-yl)ethynyl)benzoate (**13l**)**

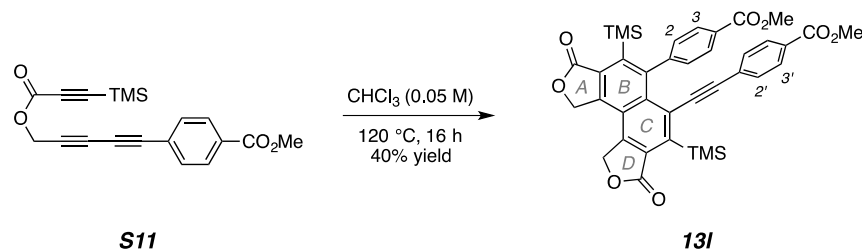

Following general procedure C, the naphthalene derivative **13l** was prepared from triyne **S11** (34 mg, 0.10 mmol) in  $\text{CHCl}_3$  (2.0 mL). The crude product was purified by MPLC (hexanes:EtOAc 4:1) to yield **13l** (14 mg, 0.021 mmol, 41%, contained 2 wt% EtOAc based on  $^1\text{H}$  NMR spectrum, 40% corrected yield) as a pale yellow amorphous solid. A small amount of the minor regioisomer (see **13i'**, above, for characterization of an analogous minor isomer) was observed by analysis of the  $^1\text{H}$  NMR spectrum of the crude product mixture (rr = 11:1).

**$^1\text{H}$  NMR** (500 MHz,  $\text{CDCl}_3$ ):  $\delta$  7.92 (nfod,  $J = 8.4$  Hz, 2H,  $H3$ ), 7.88 (nfod,  $J = 8.6$  Hz, 2H,  $H3'$ ), 7.50 (nfod,  $J = 8.4$  Hz, 2H,  $H2$ ), 7.04 (nfod,  $J = 8.6$  Hz, 2H,  $H2'$ ), 5.66 (s, 2H,  $\text{CH}_2\text{O}$ ), 5.63 (s, 2H,  $\text{CH}_2\text{O}$ ), 3.93 (s, 3H,  $\text{OCH}_3$ ), 3.80 (s, 3H,  $\text{OCH}_3$ ), 0.47 [s, 9H,  $\text{Ar}_{\text{ringC}}\text{-Si}(\text{CH}_3)_3$ ], and -0.01 [s, 9H,  $\text{Ar}_{\text{ringB}}\text{-Si}(\text{CH}_3)_3$ ].

**$^{13}\text{C}$  NMR** (126 MHz,  $\text{CDCl}_3$ ):  $\delta$  170.6, 169.9, 166.5, 166.4, 149.0, 148.2, 146.9, 144.4, 144.0, 142.0, 136.4, 132.2, 131.3, 130.6, 130.5, 129.8, 129.7, 129.6, 129.4, 129.2, 127.9, 122.9, 106.3, 93.1, 68.8, 68.7, 52.4, 52.2, 1.70, and 1.66.

**IR** (neat): 2990, 2952, 2899, 2202, 1762, 1720, 1605, 1436, 1403, 1358, 1277, 1248, 1110, 1036, 1000, 843, and 767  $\text{cm}^{-1}$ .

**HRMS** (ESI-TOF): Calcd for  $\text{C}_{38}\text{H}_{36}\text{NaO}_8\text{Si}_2^+$  [ $\text{M}+\text{Na}^+$ ] requires 699.1841; found 699.1865.

**5-(4-Fluorophenyl)-6-((4-fluorophenyl)ethynyl)-4,7-bis(trimethylsilyl)naphtho[1,2-c:7,8-c']difuran-3,8(1H,10H)-dione (**13m**)**

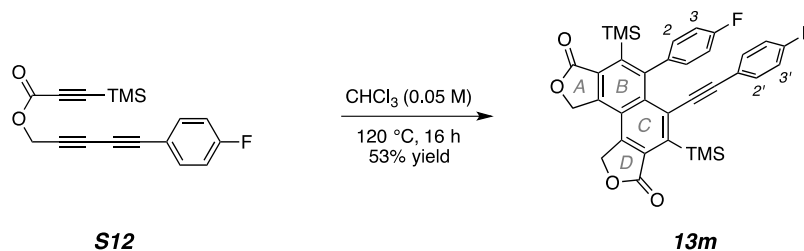

Following general procedure C, the naphthalene derivative **13m** was prepared from triyne **S12** (45 mg, 0.15 mmol) in  $\text{CHCl}_3$  (3.0 mL). The crude product was purified by MPLC

(hexanes:EtOAc 4:1) to yield **13m** (24 mg, 0.040 mmol, 53%) as a yellow solid. A small amount of the minor regioisomer (see **13i'**, above, for characterization of an analogous minor isomer) was observed by analysis of the  $^1\text{H}$  NMR spectrum of the crude product mixture (rr = 9:1).

$^1\text{H}$  NMR (500 MHz,  $\text{CDCl}_3$ ):  $\delta$  7.36 (nfodd,  $J = 8.5, 5.5$  Hz, 2H,  $H2$ ), 7.04 (nfodd,  $J = 8.9, 5.4$  Hz, 2H,  $H2'$ ), 6.99 (nfodd,  $J = 8.6, 4.9$  Hz, 2H,  $H3$ ), 6.98 (nfodd,  $J = 8.8, 5.1$  Hz, 2H,  $H3'$ ), 5.64 (s, 2H,  $\text{CH}_2\text{O}$ ), 5.62 (s, 2H,  $\text{CH}_2\text{O}$ ), 0.47 [s, 9H,  $\text{Ar}_{\text{ringC}}\text{-Si}(\text{CH}_3)_3$ ], and 0.02 [s, 9H,  $\text{Ar}_{\text{ringB}}\text{-Si}(\text{CH}_3)_3$ ].

$^{13}\text{C}$  NMR (126 MHz,  $\text{CDCl}_3$ ):  $\delta$  170.8, 170.1, 163.2 (d,  $J = 248$  Hz), 162.6 (d,  $J = 250$  Hz), 149.0, 147.7, 144.1, 143.6, 141.7, 138.7 (d,  $J = 3.4$  Hz), 137.1, 133.8 (d,  $J = 8.8$  Hz), 132.6 (d,  $J = 8.8$  Hz), 132.3, 129.7, 129.1, 122.9, 119.5 (d,  $J = 3.5$  Hz), 115.8 (d,  $J = 18$  Hz), 115.6 (d,  $J = 16$  Hz), 107.0, 89.9 (d,  $J = 1.7$  Hz), 68.8, 68.6, 1.7, and 1.5.

$^{19}\text{F}$  NMR (470 MHz,  $\text{CDCl}_3$ ):  $\delta$  -110.3, and -113.1.

IR (neat): 2950, 2899, 2192, 1760, 1600, 1507, 1400, 1358, 1247, 1230, 1156, 1112, 1036, 1000, 841, and 767  $\text{cm}^{-1}$ .

HRMS (ESI-TOF): Calcd for  $\text{C}_{34}\text{H}_{30}\text{F}_2\text{NaO}_4\text{Si}_2^+$  [ $\text{M}+\text{Na}^+$ ] requires 619.1543; found 619.1534.

Mp: 131–136  $^\circ\text{C}$ .

### 5-(4-Bromophenyl)-6-((4-bromophenyl)ethynyl)-4,7-bis(trimethylsilyl)naphtho[1,2-c:7,8-c']difuran-3,8(1H,10H)-dione (**13n**)

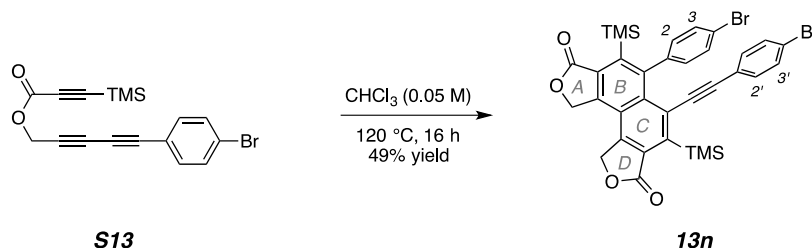

Following general procedure C, the naphthalene derivative **13n** was prepared from triene **S13** (54 mg, 0.15 mmol) in  $\text{CHCl}_3$  (3.0 mL). The crude product was purified by MPLC (hexanes:EtOAc 4:1) to yield **13n** (26 mg, 0.037 mmol, 49%) as a yellow solid. A small amount of the minor regioisomer (see **13i'**, above, for characterization of an analogous minor isomer) was observed by analysis of the  $^1\text{H}$  NMR spectrum of the crude product mixture (rr = 9:1).

$^1\text{H}$  NMR (500 MHz,  $\text{CDCl}_3$ ):  $\delta$  7.45 (nfod,  $J = 8.4$  Hz, 2H,  $H3$ ), 7.43 (nfod,  $J = 8.4$  Hz, 2H,  $H3'$ ), 7.26 (nfod,  $J = 8.3$  Hz, 2H,  $H2$ ), 6.92 (nfod,  $J = 8.5$  Hz, 2H,  $H2'$ ), 5.64 (s, 2H,  $\text{CH}_2\text{O}$ ), 5.62 (s, 2H,  $\text{CH}_2\text{O}$ ), 0.46 [s, 9H,  $\text{Ar}_{\text{ringC}}\text{-Si}(\text{CH}_3)_3$ ], and 0.02 [s, 9H,  $\text{Ar}_{\text{ringB}}\text{-Si}(\text{CH}_3)_3$ ].

$^{13}\text{C}$  NMR (126 MHz,  $\text{CDCl}_3$ ):  $\delta$  170.7, 170.0, 148.8, 148.0, 144.2, 143.8, 141.8, 141.5, 136.7, 133.7, 132.2, 131.81, 131.78, 131.7, 129.8, 129.2, 123.7, 122.9, 122.9, 122.1, 106.8, 91.2, 68.8, 68.6, 1.7, and 1.5.

**IR** (neat): 2949, 2899, 2194, 1760, 1486, 1401, 1357, 1248, 1191, 1112, 1036, 1010, 1000, 841, and 766  $\text{cm}^{-1}$ .

**HRMS** (ESI-TOF): Calcd for  $\text{C}_{34}\text{H}_{30}^{79}\text{Br}_2\text{NaO}_4\text{Si}_2^+$  [ $\text{M}+\text{Na}^+$ ] requires 738.9942; found 738.9918.

**Mp**: 182–186  $^\circ\text{C}$ .

**4-((6-(4-Cyanophenyl)-3,8-dioxo-4,7-bis(trimethylsilyl)-1,3,8,10-tetrahydronaphtho[1,2-c:7,8-c']difuran-5-yl)ethynyl)benzotrile (13o)**

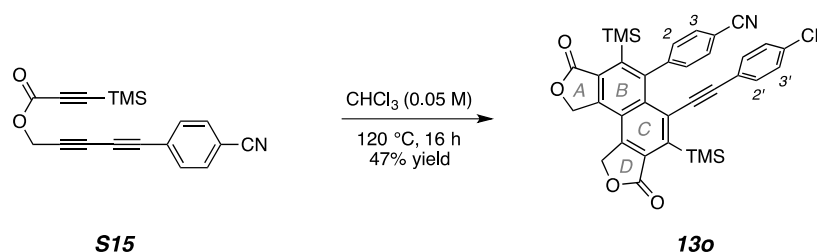

Following general procedure C, the naphthalene derivative **13o** was prepared from triyne **S15** (46 mg, 0.15 mmol) in  $\text{CHCl}_3$  (3.0 mL). The crude product was purified by MPLC (hexanes:EtOAc 4:1) to yield **13o** (22 mg, 0.036 mmol, 47%) as a pale yellow solid. A small amount of the minor regioisomer (see **13i'**, above, for characterization of an analogous minor isomer) was observed by analysis of the  $^1\text{H}$  NMR spectrum of the crude product mixture (rr = 8:1).

**$^1\text{H}$  NMR** (500 MHz,  $\text{CDCl}_3$ ):  $\delta$  7.63 (nfod,  $J = 8.3$  Hz, 2H,  $H3'$ ), 7.57 (nfod,  $J = 8.5$  Hz, 2H,  $H3$ ), 7.55 (nfod,  $J = 8.5$  Hz, 2H,  $H2$ ), 7.12 (nfod,  $J = 8.4$  Hz, 2H,  $H2'$ ), 5.66 (s, 2H,  $\text{CH}_2\text{O}$ ), 5.64 (s, 2H,  $\text{CH}_2\text{O}$ ), 0.47 [s, 9H,  $\text{Ar}_{\text{ringC}}\text{-Si}(\text{CH}_3)_3$ ], and 0.01 [s, 9H,  $\text{Ar}_{\text{ringB}}\text{-Si}(\text{CH}_3)_3$ ].

**$^{13}\text{C}$  NMR** (126 MHz,  $\text{CDCl}_3$ ):  $\delta$  170.4, 169.7, 148.8, 147.7, 147.3, 144.7, 144.4, 142.3, 136.3, 132.9, 132.4, 132.1, 130.8, 130.4, 130.0, 129.4, 127.5, 123.0, 118.23, 118.18, 113.0, 112.5, 105.2, 94.1, 68.8, 68.6, 1.7, and 1.6.

**IR** (neat): 2954, 2933, 2228, 1758, 1456, 1400, 1361, 1249, 1108, 1032, 1000, and 841  $\text{cm}^{-1}$ .

**HRMS** (ESI-TOF): Calcd for  $\text{C}_{36}\text{H}_{30}\text{N}_2\text{NaO}_4\text{Si}_2^+$  [ $\text{M}+\text{Na}^+$ ] requires 633.1636; found 633.1647.

**Mp**: 345–348  $^\circ\text{C}$  (with no obvious discoloration).

**Dimethyl 5-(3,3-Dimethylbut-1-yn-1-yl)-6-(4-(methoxycarbonyl)phenyl)-7-((4-(methoxycarbonyl)phenyl)ethynyl)-3-oxo-1,3,8,10-tetrahydro-9H-cyclopenta[7,8]naphtho[1,2-c]furan-9,9-dicarboxylate (16a)**

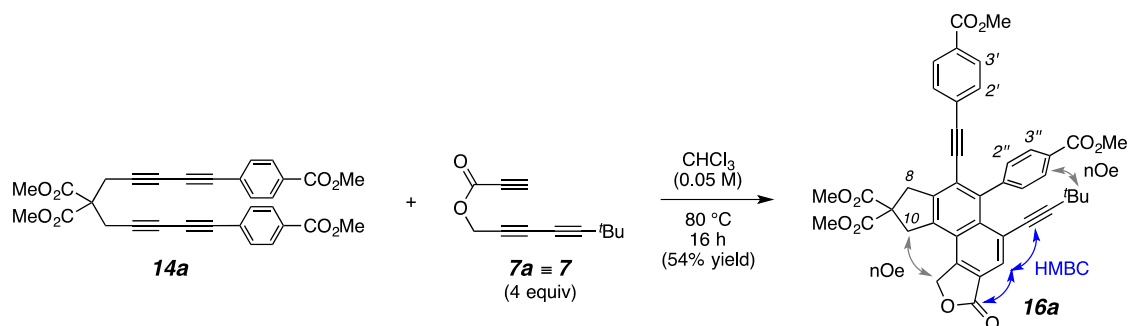

Following general procedure C, the naphthalene derivative **16a** was prepared from a mixture of the tetrayne **14a**<sup>[14]</sup> (26 mg, 0.050 mmol) and triyne **7a** (38 mg, 0.20 mmol) in  $\text{CHCl}_3$  (1.0 mL). The crude product was purified by MPLC (hexanes:EtOAc 1.5:1) to yield the heterodimer **16a** (19 mg, 0.027 mmol, 54%) as a white solid.

**<sup>1</sup>H NMR** (500 MHz,  $\text{CDCl}_3$ ):  $\delta$  8.14 (nfod,  $J = 8.3$  Hz, 2H,  $H3'$ ), 7.98 (s, 1H, Naph- $H$ ), 7.93 (nfod,  $J = 8.4$  Hz, 2H,  $H3''$ ), 7.48 (nfod,  $J = 8.4$  Hz, 2H,  $H2''$ ), 7.18 (nfod,  $J = 8.4$  Hz, 2H,  $H2'$ ), 5.83 (s, 2H,  $\text{CH}_2\text{O}$ ), 4.08 (s, 2H,  $H10$ ), 4.00 (s, 3H,  $\text{OCH}_3$ ), 3.97 (s, 2H,  $H8$ ), 3.92 (s, 3H,  $\text{OCH}_3$ ), 3.84 (s, 6H, malonyl- $\text{CH}_3$ ), and 0.92 [s, 9H,  $\text{C}(\text{CH}_3)_3$ ].

**nOe & HMBC**: The interaction indicated on structure **16a** supported the assignment of regiochemical orientation for this product.

**<sup>13</sup>C NMR** (126 MHz,  $\text{CDCl}_3$ ):  $\delta$  171.6, 170.6, 167.2, 166.5, 145.5, 144.3, 143.1, 140.7, 135.5, 133.0, 131.6, 131.4, 130.2, 130.1, 129.7, 129.6, 129.0, 127.1, 125.5, 125.4, 123.9, 122.5, 111.1, 99.1, 89.4, 78.9, 70.9, 59.3, 53.6, 52.4, 41.9, 41.2, 30.4, and 28.1 (one methoxy carbon was not discernible).

**IR** (neat): 2957, 2928, 2860, 2118, 1769, 1731, 1719, 1652, 1435, 1273, 1107, and  $830\text{ cm}^{-1}$ .

**HRMS** (ESI-TOF): Calcd for  $\text{C}_{43}\text{H}_{36}\text{NaO}_{10}^+$  [ $\text{M}+\text{Na}^+$ ] requires 735.2201; found 735.2173.

**Mp**: 294–297  $^\circ\text{C}$ .

**Dimethyl 6-(4-Methoxyphenyl)-7-((4-methoxyphenyl)ethynyl)-3-oxo-5-((triisopropylsilyl)ethynyl)-1,3,8,10-tetrahydro-9H-cyclopenta[7,8]naphtho[1,2-c]furan-9,9-dicarboxylate (**16b**)**

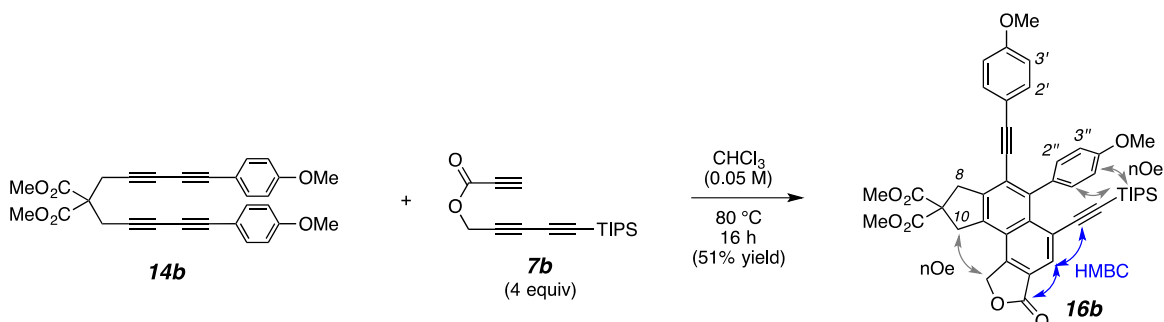



Following general procedure C, the naphthalene derivative **16b** was prepared from a mixture of the tetrayne **14b**<sup>[14]</sup> (23 mg, 0.049 mmol) and triyne **7b** (57 mg, 0.20 mmol) in CHCl<sub>3</sub> (1.0 mL). The crude product was purified by MPLC (hexanes:EtOAc 2:1) to yield the heterodimer **16b** (19 mg, 0.025 mmol, 51%) as a white solid.

**<sup>1</sup>H NMR** (500 MHz, CDCl<sub>3</sub>): δ 8.04 (s, 1H, Naph-*H*), 7.29 (nfod, *J* = 8.6 Hz, 2H, *H*2''), 7.18 (nfod, *J* = 8.8 Hz, 2H, *H*2'), 6.93 (nfod, *J* = 8.7 Hz, 2H, *H*3''), 6.81 (nfod, *J* = 8.8 Hz, 2H, *H*3'), 5.81 (s, 2H, CH<sub>2</sub>O), 4.05 (s, 2H, *H*10), 3.96 (s, 2H, *H*8), 3.87 (s, 3H, Ar-ArOCH<sub>3</sub>), 3.83 (s, 6H, malonyl-CH<sub>3</sub>), 3.81 (s, 3H, ≡CArOCH<sub>3</sub>), 1.00 {d, *J* = 6.8 Hz, 18H, Si[CH(CH<sub>3</sub>)<sub>2</sub>]<sub>3</sub>}, and 0.96–0.89 [m, 3H, Si(CH<sub>3</sub>)<sub>3</sub>].

**nOe & HMBC**: The interaction indicated on structure **16b** supported the assignment of regiochemical orientation for this product.

**<sup>13</sup>C NMR** (126 MHz, CDCl<sub>3</sub>) δ 171.8, 170.7, 160.2, 159.3, 145.2, 143.1, 140.8, 134.3, 134.0, 133.4, 132.7, 132.3, 130.8, 125.0, 124.8, 124.2, 123.2, 115.0, 114.1, 113.2, 105.7, 103.7, 100.1, 86.3, 70.8, 59.4, 55.5, 55.0, 53.6, 41.9, 41.3, 18.9, and 11.7.

**IR** (neat): 2953, 2864, 2197, 2130, 1772, 1735, 1601, 1509, 1457, 1400, 1285, 1248, 1170, 1028, and 826 cm<sup>-1</sup>.

**HRMS** (ESI-TOF): Calcd for C<sub>46</sub>H<sub>48</sub>NaO<sub>8</sub>Si<sup>+</sup> [M+Na<sup>+</sup>] requires 779.3011; found 779.3000.

**Mp**: 240–243 °C.

**4-Methyl-7-(methylsulfonyl)-9-(naphthalen-1-ylethynyl)-5-(prop-1-yn-1-yl)-10-(trimethylsilyl)-3,6,7,8-tetrahydro-1H-isobenzofuro[5,4-e]isoindol-1-one (**16c'**) and 6-Methyl-9-(methylsulfonyl)-5-(naphthalen-1-ylethynyl)-7-(prop-1-yn-1-yl)-4-(trimethylsilyl)-1,8,9,10-tetrahydro-3H-isobenzofuro[4,5-e]isoindol-3-one (**16c**)**

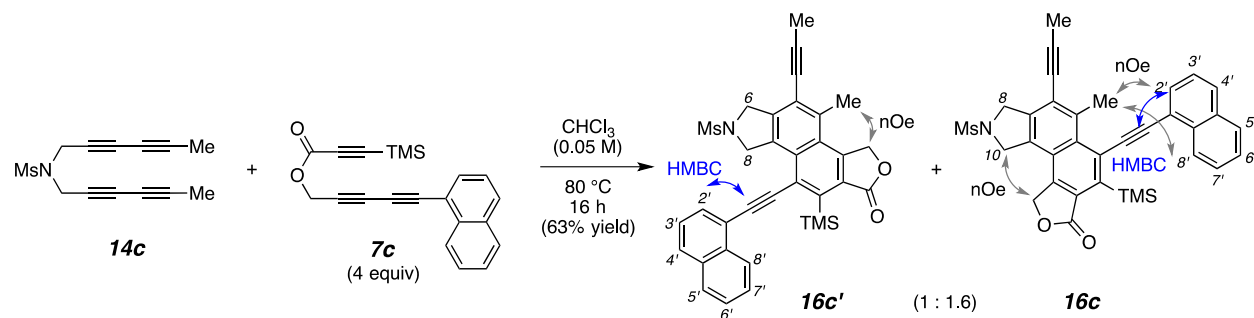

Following general procedure C, the naphthalene derivatives **16c** and **16c'** were prepared from a mixture of tetrayne **14c**<sup>[15]</sup> (20 mg, 0.081 mmol) and triyne **7c** (106 mg, 0.32 mmol) in CHCl<sub>3</sub> (1.6 mL). The crude product mixture was purified by MPLC (hexanes:EtOAc 2.5:1) to yield, in the order of elution, the heterodimers **16c'** (11 mg, 0.019 mmol, 24%) and **16c** (18 mg, 0.031 mmol, 39%), each as a white solid.

Data for **16c'**

**<sup>1</sup>H NMR** (500 MHz, CDCl<sub>3</sub>): δ 8.32 (d, *J* = 8.1 Hz, 1H, *H8'*), 7.93 (two d's, *J* = 7.6 Hz, 2H, overlapped *H2'* and *H5'*), 7.91 (dd, *J* = 7.5, 1.3 Hz, 1H, *H4'*), 7.61–7.53 (m, 3H, *H3'*, *H6'*, and *H7'*), 5.84 (s, 2H, CH<sub>2</sub>O), 5.75 (s, 2H, *H8*), 4.86 (s, 2H, *H6*), 2.89 (s, 3H, ArCH<sub>3</sub>), 2.74 (s, 3H, O<sub>2</sub>S-CH<sub>3</sub>), 2.19 (s, 3H, ≡CCH<sub>3</sub>), and 0.57 [s, 9H, Si(CH<sub>3</sub>)<sub>3</sub>].

**nOe & HMBC**: The interaction indicated on structure **16c'** for a pair of resonances in the minor isomer supported the assignment of regiochemical orientation for each of the two constitutional isomers.

**<sup>13</sup>C NMR** (126 MHz, CDCl<sub>3</sub>) δ 170.9, 146.5, 143.1, 140.9, 137.9, 133.5, 133.3, 132.2, 131.2, 130.7, 129.9, 129.0, 128.9, 128.8, 128.6, 127.3, 126.8, 125.9, 125.8, 120.4, 120.1, 98.9, 97.5, 95.8, 75.7, 71.5, 57.8, 54.6, 35.1, 19.8, 5.0, and 2.2.

**IR** (neat): 2957, 2930, 2216, 1762, 1652, 1401, 1334, 1247, 1217, 1154, 1096, 1043, 827, and 803 cm<sup>-1</sup>.

**HRMS** (ESI-TOF): Calcd for C<sub>34</sub>H<sub>31</sub>NNaO<sub>4</sub>SSi<sup>+</sup> [M+Na<sup>+</sup>] requires 600.1635; found 600.1648.

**Mp**: 268–272 °C.

Data for **16c**

**<sup>1</sup>H NMR** (500 MHz, CDCl<sub>3</sub>): δ 8.27–8.23 (nfom, 1H, *H8'*), 7.90 (d, *J* = 7.2 Hz, 1H, *H4'*), 7.90–7.88 (nfom, 1H, *H5'*), 7.77 (dd, *J* = 7.1, 1.0 Hz, 1H, *H2'*), 7.56–7.49 (m, 3H, *H3'*, *H6'*, and *H7'*), 5.62 (s, 2H, CH<sub>2</sub>O), 5.11 (s, 2H, *H10*), 4.90 (s, 2H, *H8*), 3.29 (s, 3H, ArCH<sub>3</sub>), 2.98 (s, 3H, O<sub>2</sub>S-CH<sub>3</sub>), 2.17 (s, 3H, ≡CCH<sub>3</sub>), and 0.59 [s, 9H, Si(CH<sub>3</sub>)<sub>3</sub>].

**nOe & HMBC**: The interactions indicated on structure **16c** for pairs of resonances of the major isomer supported the assignment of regiochemical orientation for each of the two constitutional isomers.

**<sup>13</sup>C NMR** (126 MHz, CDCl<sub>3</sub>) δ 170.7, 144.7, 143.8, 140.2, 138.2, 136.2, 133.5, 133.3, 130.0, 129.9, 129.5, 128.7, 128.7, 128.1, 127.1, 126.8, 126.1, 125.5, 123.0, 122.6, 121.1, 102.7, 98.5, 96.7, 76.4, 69.2, 55.3, 54.8, 35.8, 23.2, 5.0, and 2.2.

**IR** (neat): 3055, 2944, 2896, 2218, 1759, 1404, 1346, 1323, 1241, 1154, 1098, 1023, 826, 796, and 763 cm<sup>-1</sup>.

**HRMS** (ESI-TOF): Calcd for C<sub>34</sub>H<sub>31</sub>NNaO<sub>4</sub>SSi<sup>+</sup> [M+Na<sup>+</sup>] requires 600.1635; found 600.1657.

**Mp**: decomposition > ca. 250 °C.

---

**Methyl 4-((9-Acetoxy-5-((*tert*-butyldimethylsilyl)ethynyl)-6-(4-(methoxycarbonyl)phenyl)-3-oxo-3,8,9,10-tetrahydro-1H-cyclopenta[7,8]naphtho[1,2-c]furan-7-yl)ethynyl)benzoate (16d)**



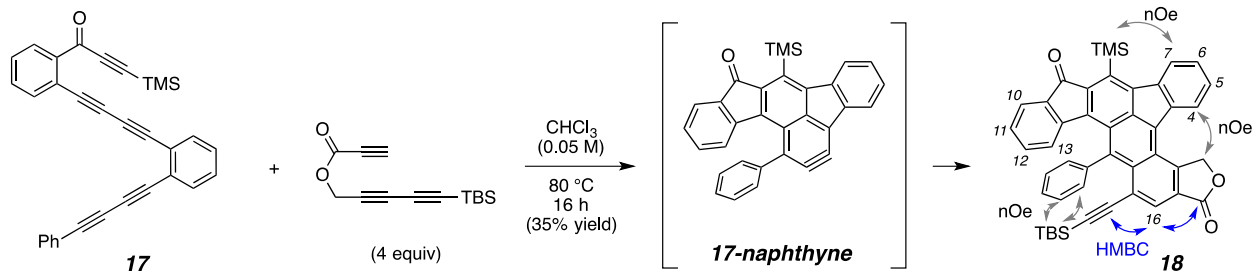

Following general procedure C, the anthracene derivative **18** was prepared from a mixture of pentayne **17**<sup>[16]</sup> (22 mg, 0.049 mmol) and 5-(*tert*-butyldimethylsilyl)penta-2,4-diyn-1-yl propiolate<sup>[13]</sup> (49 mg, 0.20 mmol) in  $\text{CHCl}_3$  (1.0 mL). The crude product was purified by MPLC (hexanes:EtOAc 9:1) to yield the heterodimer **18** (12 mg, 0.017 mmol, 35%, via the naphthynes **17-naphthynes**) as a dark red, amorphous solid.

**<sup>1</sup>H NMR** (500 MHz,  $\text{CDCl}_3$ ):  $\delta$  8.03 (nfod,  $J = 7.7$  Hz, 1H,  $H_4$ ), 8.01 (s, 1H,  $H_{16}$ ), 7.98 (nfod,  $J = 7.6$  Hz, 1H,  $H_7$ ), 7.65 (nfod,  $J = 7.5$  Hz, 2H,  $\text{Ph}H_o$ ), 7.56 (dd,  $J = 7.5, 7.5$  Hz, 1H,  $H_6$ ), 7.47 (d,  $J = 7.1$  Hz, 1H,  $H_{10}$ ), 7.46–7.38 (m, 4H,  $\text{Ph}H_{m+p}$  and  $H_5$ ), 6.99 (dd,  $J = 7.3, 7.3$  Hz, 1H,  $H_{11}$ ), 6.72 (ddd,  $J = 7.6, 7.6, 0.9$  Hz, 1H,  $H_{12}$ ), 6.14 (s, 2H,  $\text{CH}_2\text{O}$ ), 5.35 (d,  $J = 7.7$  Hz, 1H,  $H_{13}$ ), 0.80 [s, 9H,  $\text{Si}(\text{CH}_3)_3$ ], 0.56 [s, 9H,  $\text{Si}(\text{CH}_3)_3$ ], and -0.10 [s, 6H,  $\text{Si}(\text{CH}_3)_2$ ].

**nOe & HMBC**: The interaction indicated on structure **18** supported the assignment of regiochemical orientation for this product.

**<sup>13</sup>C NMR** (126 MHz,  $\text{CDCl}_3$ )  $\delta$  195.5, 170.6, 147.9, 146.5, 145.5, 144.6, 142.5, 141.0, 140.8, 139.7, 139.5, 136.8, 136.7, 134.7, 134.6, 133.9, 133.8, 132.5, 130.0, 129.5, 129.0, 128.4, 127.9, 127.5, 127.2, 127.0, 126.9, 125.2, 125.1, 124.9, 123.4, 122.9, 106.0, 103.5, 73.5, 26.4, 17.0, 1.8, and -4.3.

**IR** (neat): 2952, 2928, 2855, 2133, 1771, 1708, 1461, 1397, 1351, 1249, 1197, 1023, 813, and 757  $\text{cm}^{-1}$ .

**LRMS** (APCI<sup>+</sup>): Calcd for  $\text{C}_{46}\text{H}_{41}\text{O}_3\text{Si}_2^+$  [ $\text{M}+\text{H}^+$ ] requires 697.2589; found 697.3 (no ESI signal could be observed).

**11-((*tert*-Butyldimethylsilyl)ethynyl)-8,9-dimethoxy-4-methyl-5-(trimethylsilyl)-1H-indeno[1',2':5,6]naphtho[1,2-c]furan-1,6(3H)-dione (20) and 5-((*tert*-Butyldimethylsilyl)ethynyl)-10,11-dimethoxy-6-methyl-7-(trimethylsilyl)-1H-indeno[2',1':7,8]naphtho[1,2-c]furan-3,8-dione (20')**

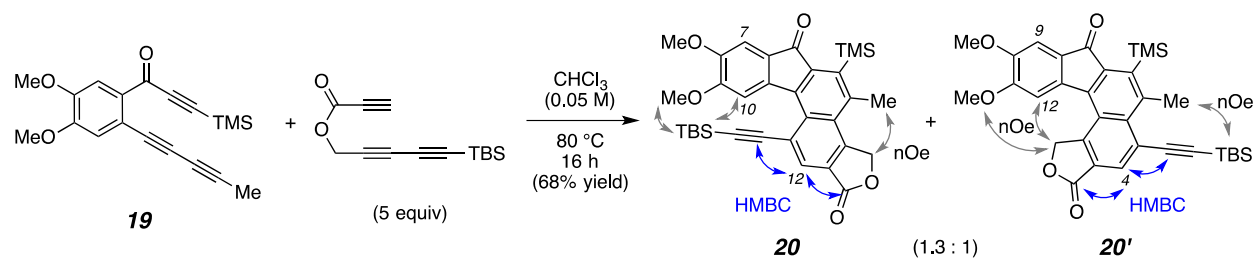

Following general procedure C, the anthracene derivatives **20** and **20'** were prepared from a mixture of triyne **19**<sup>[17]</sup> (16 mg, 0.049 mmol) and 5-(*tert*-butyldimethylsilyl)penta-2,4-diyne-1-yl propiolate<sup>[13]</sup> (62 mg, 0.25 mmol) in  $\text{CHCl}_3$  (1.0 mL). The crude product was purified by MPLC (hexanes:EtOAc 5:1) to yield, in the order of elution, the heterodimers **20** (11 mg, 0.019 mmol, 39%) as a cherry-red amorphous solid and **20'** (8.0 mg, 0.014 mmol, 29%) as an orange crystalline solid.

#### Data for **20**

**$^1\text{H NMR}$**  (500 MHz,  $\text{CDCl}_3$ ):  $\delta$  8.13 (s, 1H, *H*12), 7.72 (s, 1H, *H*10), 7.13 (s, 1H, *H*7), 5.83 (s, 2H,  $\text{CH}_2\text{O}$ ), 4.02 (s, 3H,  $\text{OCH}_3$ ), 3.93 (s, 3H,  $\text{OCH}_3$ ), 2.77 (s, 3H,  $\text{ArCH}_3$ ), 0.87 [s, 9H,  $\text{Si}(\text{CH}_3)_3$ ], 0.47 [s, 9H,  $\text{Si}(\text{CH}_3)_3$ ], and 0.06 [s, 6H,  $\text{Si}(\text{CH}_3)_2$ ].

**nOe & HMBC**: The interaction indicated on structure **20** supported the assignment of regiochemical orientation for this product.

**$^{13}\text{C NMR}$**  (126 MHz,  $\text{CDCl}_3$ )  $\delta$  194.5, 170.4, 152.7, 149.3, 147.0, 143.7, 141.7, 140.5, 139.8, 139.2, 132.3, 131.7, 130.0, 125.6, 125.1, 122.2, 112.1, 106.9, 106.2, 104.9, 72.7, 56.6, 56.4, 26.2, 24.3, 16.9, 2.4, and -4.9.

**IR** (neat): 2951, 2930, 2855, 2143, 1768, 1707, 1590, 1484, 1381, 1294, 1248, 1216, 1105, 1026, 889, 840, and  $776\text{ cm}^{-1}$ .

**HRMS** (ESI-TOF): Calcd for  $\text{C}_{33}\text{H}_{38}\text{NaO}_5\text{Si}_2^+$  [ $\text{M}+\text{Na}^+$ ] requires 593.2150; found 593.2145

#### Data for **20'**

**$^1\text{H NMR}$**  (500 MHz,  $\text{CDCl}_3$ ):  $\delta$  8.15 (s, 1H, *H*4), 7.22 (s, 1H, *H*9), 7.07 (s, 1H, *H*12), 5.85 (s, 2H,  $\text{CH}_2\text{O}$ ), 4.05 (s, 3H,  $\text{OCH}_3$ ), 3.95 (s, 3H,  $\text{OCH}_3$ ), 3.16 (s, 3H,  $\text{ArCH}_3$ ), 1.03 [s, 9H,  $\text{Si}(\text{CH}_3)_3$ ], 0.46 [s, 9H,  $\text{Si}(\text{CH}_3)_3$ ], and 0.24 [s, 6H,  $\text{Si}(\text{CH}_3)_2$ ].

**nOe & HMBC**: The interaction indicated on structure **20'** supported the assignment of regiochemical orientation for this product.

**$^{13}\text{C NMR}$**  (126 MHz,  $\text{CDCl}_3$ )  $\delta$  194.0, 170.0, 154.0, 149.8, 147.1, 144.3, 142.1, 141.0, 139.7, 139.04, 139.00, 131.5, 126.9, 124.4, 124.0, 123.8, 108.2, 107.2, 106.5, 103.3, 72.3, 56.8, 56.4, 28.6, 26.4, 17.1, 2.5, and -4.7.

**IR** (neat): 2952, 2856, 2114, 1769, 1701, 1591, 1494, 1459, 1371, 1313, 1244, 1086, 1021, 865, and  $824\text{ cm}^{-1}$ .

**HRMS** (ESI-TOF): Calcd for  $\text{C}_{33}\text{H}_{38}\text{NaO}_5\text{Si}_2^+$  [ $\text{M}+\text{Na}^+$ ] requires 593.2150; found 593.2134

**Mp**: 265–270  $^\circ\text{C}$ .

**Dimethyl 6-Mesityl-5-(4-(methoxycarbonyl)phenyl)-4-((4-(methoxycarbonyl)phenyl)ethynyl)-9-oxo-1,3,7,9-tetrahydro-2H-cyclopenta[5,6]naphtho[2,3-c]furan-2,2-dicarboxylate (**21**) and Dimethyl 5-Mesityl-6-(4-(methoxycarbonyl)phenyl)-7-((4-(methoxycarbonyl)phenyl)ethynyl)-3-oxo-1,3,8,10-tetrahydro-9H-cyclopenta[7,8]naphtho[1,2-c]furan-9,9-dicarboxylate (**21'**)**

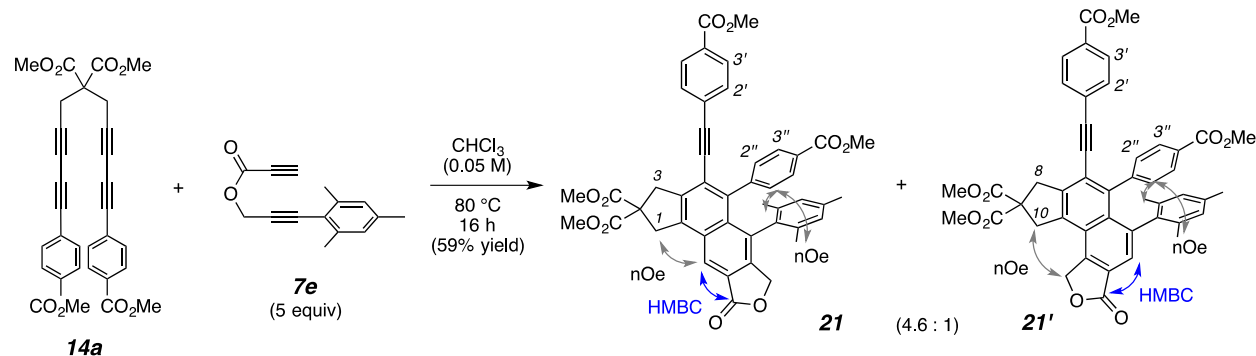

Following general procedure C, the naphthalene derivatives **21** and **21'** were prepared from a mixture of tetrayne **14a**<sup>[14]</sup> (26 mg, 0.050 mmol) and diyne **7e** (56 mg, 0.25 mmol) in  $\text{CHCl}_3$  (1.0 mL). The crude product mixture was purified by MPLC (hexanes:EtOAc 2:1) to yield, in the order of elution, the heterodimers **21** (18 mg, 0.024 mmol, 48%) and **21'** (4.0 mg, 5.3  $\mu\text{mol}$ , 11%), each as a white solid.

**Data for 21**

**$^1\text{H}$  NMR** (500 MHz,  $\text{CDCl}_3$ ):  $\delta$  8.50 (s, 1H, ArH), 7.85 (d,  $J = 7.9$  Hz, 2H,  $H_{3''}$ ), 7.66 (d,  $J = 7.7$  Hz, 2H,  $H_{3'}$ ), 7.05 (mfod,  $J = 7.8$  Hz, 2H,  $H_{2'}$ ), 6.99 (d,  $J = 7.9$  Hz, 2H,  $H_{2''}$ ), 6.49 (s, 2H, mesityl-H), 4.74 (s, 2H,  $\text{CH}_2\text{O}$ ), 4.22 (s, 2H,  $H_{10}$ ), 4.01 (s, 2H,  $H_8$ ), 3.94 (s, 3H,  $\text{OCH}_3$ ), 3.89 (s, 3H,  $\text{OCH}_3$ ), 3.86 (s, 6H, malonyl- $\text{CH}_3$ ), 2.09 (s, 3H,  $\text{Ar}_{\text{para}}\text{CH}_3$ ), 1.70 (s, 6H,  $\text{Ar}_{\text{ortho}}\text{CH}_3$ ).

**nOe & HMBC:** The interaction indicated on structure **21** supported the assignment of regiochemical orientation for this product.

**$^{13}\text{C}$  NMR** (126 MHz,  $\text{CDCl}_3$ )  $\delta$  172.0, 171.1, 167.1, 166.5, 144.5, 142.4, 141.2, 138.63, 138.59, 138.2, 134.9, 134.6, 133.6, 132.5, 131.5, 131.3, 129.9, 129.5, 129.0, 128.6, 128.4, 128.0, 127.1, 124.0, 122.9, 122.6, 99.2, 89.6, 70.1, 59.0, 53.5, 52.4, 52.2, 42.1, 41.0, 20.8, 20.6, and 0.1.

**IR** (neat): 2998, 2951, 2851, 2206, 1769, 1722, 1605, 1435, 1273, 1248, 1173, 1107, 1017, 855, and  $766\text{ cm}^{-1}$ .

**HRMS** (ESI-TOF): Calcd for  $\text{C}_{46}\text{H}_{38}\text{NaO}_{10}^+$  [ $\text{M}+\text{Na}^+$ ] requires 773.2357; found 773.2361.

**Mp:** 268–273  $^\circ\text{C}$ .

**Data for 21'**

**<sup>1</sup>H NMR** (500 MHz, CDCl<sub>3</sub>): δ 7.86 (nfod, *J* = 8.4 Hz, 2H, *H*3'), 7.66 (nfod, *J* = 8.2 Hz, 2H, *H*3''), 7.50 (s, 1H, *ArH*), 7.00 (nfod, *J* = 8.3 Hz, 2H, *H*2'), 6.97 (nfod, *J* = 8.2 Hz, 2H, *H*2''), 6.43 (s, 2H, mesityl-*H*), 5.91 (s, 2H, *CH*<sub>2</sub>*O*), 4.16 (s, 2H, *H*10), 3.98 (s, 2H, *H*8), 3.95 (s, 3H, *OCH*<sub>3</sub>), 3.89 (s, 3H, *OCH*<sub>3</sub>), 3.86 (s, 6H, malonyl-*CH*<sub>3</sub>), 2.08 (s, 3H, *Ar*<sub>para</sub>*CH*<sub>3</sub>), 1.71 (s, 6H, *Ar*<sub>ortho</sub>*CH*<sub>3</sub>).

**nOe & HMBC:** The interaction indicated on structure **21'** supported the assignment of regiochemical orientation for this product.

**<sup>13</sup>C NMR** (126 MHz, CDCl<sub>3</sub>) δ 171.8, 171.1, 167.1, 166.5, 144.8, 144.7, 142.5, 140.3, 138.2, 137.6, 135.8, 135.5, 133.7, 131.5, 130.0, 129.6, 128.7, 128.3, 128.2, 128.1, 127.0, 125.9, 124.7, 124.2, 122.8, 99.3, 89.4, 71.0, 59.2, 53.7, 52.4, 52.2, 42.2, 41.3, 21.2, 20.8, and 0.2 (one sp<sup>2</sup> carbon was not discernible).

**IR** (neat): 2952, 2920, 2852, 2206, 1769, 1760, 1721, 1604, 1435, 1274, 1247, 1107, 1020, and 768 cm<sup>-1</sup>.

**HRMS** (ESI-TOF): Calcd for C<sub>46</sub>H<sub>38</sub>NaO<sub>10</sub><sup>+</sup> [*M*+Na<sup>+</sup>] requires 773.2357; found 773.2342.

**Mp:** 276–278 °C.

### Tetramethyl 5,6-Diphenyl-4-(phenylethynyl)-1,3-dihydro-2H-cyclopenta[*a*]naphthalene-2,2,8,9-tetracarboxylate (**25a**)

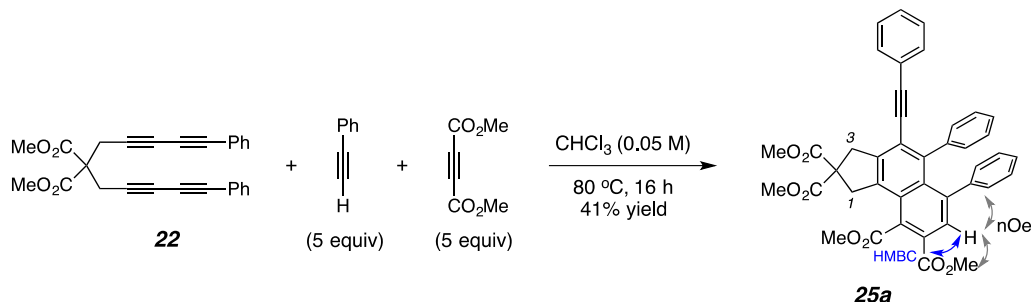

Following general procedure C, the naphthalene derivative **25a** was prepared from a mixture of tetrayne **22**<sup>[18]</sup> (40 mg, 0.098 mmol), phenylacetylene (55  $\mu$ L, 0.50 mmol), and dimethyl but-2-ynedioate (62  $\mu$ L, 0.50 mmol) in CHCl<sub>3</sub> (2.0 mL). The crude product mixture was purified by MPLC (hexanes:EtOAc 4:1) to yield the three-component product **25a** (26 mg, 0.040 mmol, 41%) as a yellow solid.

**<sup>1</sup>H NMR** (500 MHz, CDCl<sub>3</sub>): δ 7.80 (s, 1H, *NaphC*7-*H*), 7.27–7.20 (m, 3H,  $\equiv$ CPh*H*<sub>*m+p*</sub>), 7.14 (br d, *J* = 7.3 Hz, 2H,  $\equiv$ CPh*H*<sub>*o*</sub>), 7.00–6.91 (m, 8H, *C*5-Ph*H*<sub>*s*</sub> and *C*6-Ph*H*<sub>*m+p*</sub>), 6.89–6.83 (nfom, 2H, *C*6-Ph*H*<sub>*o*</sub>), 4.15 (s, 3H, *C*9-CO<sub>2</sub>*CH*<sub>3</sub>), 4.08 (s, 2H, *H*1), 3.96 (s, 2H, *H*3), 3.92 (s, 3H, *C*8-CO<sub>2</sub>*CH*<sub>3</sub>), and 3.82 (s, 6H, malonyl-*CH*<sub>3</sub>).

**nOe & HMBC:** The interactions for the indicated pairs of resonances on structure **25a** supported the assignment of constitution for this product.

Isomers **25a'** and **25a''**, which could be derived from the isomeric BCB intermediate **27a'** and which would have similar NOESY interactions, were ruled out by comparing the  $^1\text{H}$  NMR chemical shifts of  $\text{C}1\text{H}_2$  and  $\text{C}3\text{H}_2$  of **25a** with the spectral data of a previously reported compound **25a'''**.<sup>[19]</sup> Namely,  $\text{C}1\text{H}_2$  and  $\text{C}3\text{H}_2$  are quite differentially shielded in **25a'''** and would be expected to be so in either **25a'** or **25a''** as well.

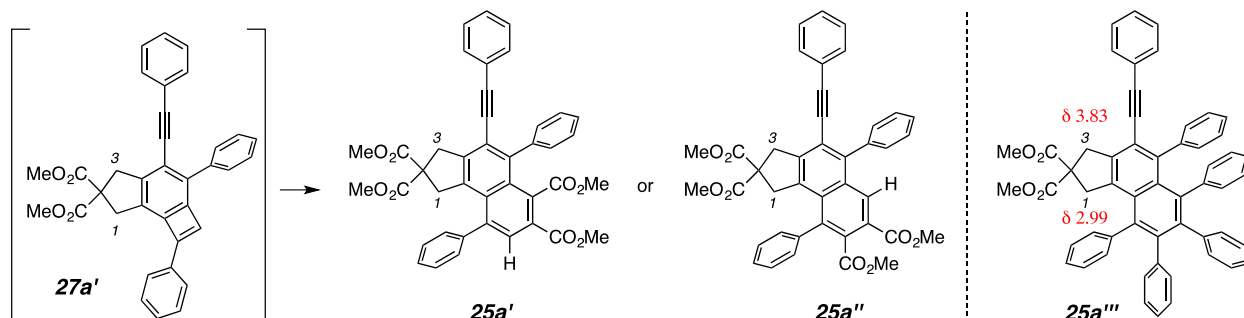

$^{13}\text{C}$  NMR (126 MHz,  $\text{CDCl}_3$ )  $\delta$  172.0, 170.9, 166.1, 143.8, 143.5, 143.0, 141.2, 140.6, 134.7, 133.6, 132.1, 131.7, 131.6, 129.9, 129.6, 128.7, 128.3, 127.9, 127.4, 127.1, 126.7, 126.4, 125.1, 122.99, 122.96, 98.9, 87.4, 59.3, 53.4, 53.1, 52.8, 41.3, and 41.2.

IR (neat): 3024, 2952, 2205, 1734, 1493, 1436, 1261, 1239, 1202, 1139, 1075, and 755  $\text{cm}^{-1}$ .

HRMS (ESI-TOF): Calcd for  $\text{C}_{41}\text{H}_{32}\text{NaO}_8^+$  [ $\text{M}+\text{Na}^+$ ] requires 675.1989; found 675.1956.

Mp: 233–235  $^\circ\text{C}$ .

### Tetramethyl 7-Methyl-5-phenyl-4-(phenylethynyl)-6-(prop-1-yn-1-yl)-1,3-dihydro-2H-cyclopenta[a]naphthalene-2,2,8,9-tetracarboxylate (**25b**)

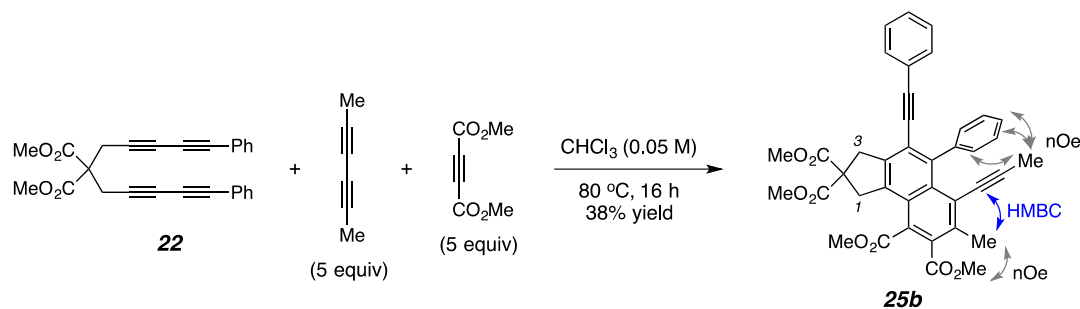

Following general procedure C, the naphthalene derivative **25b** was prepared from a mixture of tetrayne **22**<sup>[18]</sup> (40 mg, 0.098 mmol), 2,4-hexadiyne (39 mg, 0.50 mmol), and dimethyl but-2-ynedioate (62  $\mu\text{L}$ , 0.50 mmol) in  $\text{CHCl}_3$  (2.0 mL). The crude product mixture was purified by MPLC (hexanes:EtOAc 4:1) to yield the three-component product **25b** (23 mg, 0.037 mmol, 38%) as a pale yellow solid.

$^1\text{H}$  NMR (500 MHz,  $\text{CDCl}_3$ ):  $\delta$  7.47 (br dd,  $J = 7.4, 7.4$  Hz, 2H, Ar- $\text{Ph}H_m$ ), 7.39 (br d,  $J = 7.4$  Hz, 2H, Ar- $\text{Ph}H_o$ ), 7.36 (br dd,  $J = 7.2, 7.2$  Hz, 1H, Ar- $\text{Ph}H_p$ ), 7.26–7.23 (m, 3H,  $\equiv\text{CPh}H_{m+p}$ ), 7.16–7.12 (nfom, 2H,  $\equiv\text{CPh}H_o$ ), 4.01 (s, 3H, C9- $\text{CO}_2\text{CH}_3$ ), 3.93 (s, 3H, C8- $\text{CO}_2\text{CH}_3$ ), 3.90 (s,



2H, *H3*), 3.85 (s, 2H, *H1*), 3.77 (s, 6H, malonyl-*CH*<sub>3</sub>), 2.43 (s, 3H, Ar*CH*<sub>3</sub>), and 1.59 (s, 3H, ≡*CCH*<sub>3</sub>).

**nOe & HMBC:** The interactions for the indicated pairs of resonances on structure **22b** supported the assignment of constitution for this product.

<sup>13</sup>C NMR (126 MHz, CDCl<sub>3</sub>) δ 171.9, 169.7, 168.9, 143.0, 141.8, 140.4, 136.8, 134.2, 132.3, 132.1, 131.7, 131.1, 128.6, 128.3, 127.6, 127.5, 127.4, 125.2, 124.9, 123.2, 122.1, 105.4, 99.0, 87.6, 78.4, 59.6, 53.3, 53.1, 52.9, 41.6, 41.2, 19.40, and 5.39.

IR (neat): 2953, 2922, 2851, 2214, 1735, 1491, 1435, 1248, 1201, 1161, 1070, 1050, and 755 cm<sup>-1</sup>.

HRMS (ESI-TOF): Calcd for C<sub>39</sub>H<sub>32</sub>NaO<sub>8</sub><sup>+</sup> [M+Na<sup>+</sup>] requires 651.1989; found 651.1969.

Mp: 91–95 °C.

### Tetramethyl 6-(4-methoxyphenyl)-5-phenyl-4-(phenylethynyl)-1,3-dihydro-2H-cyclopenta[*a*]naphthalene-2,2,8,9-tetracarboxylate (**25c**)

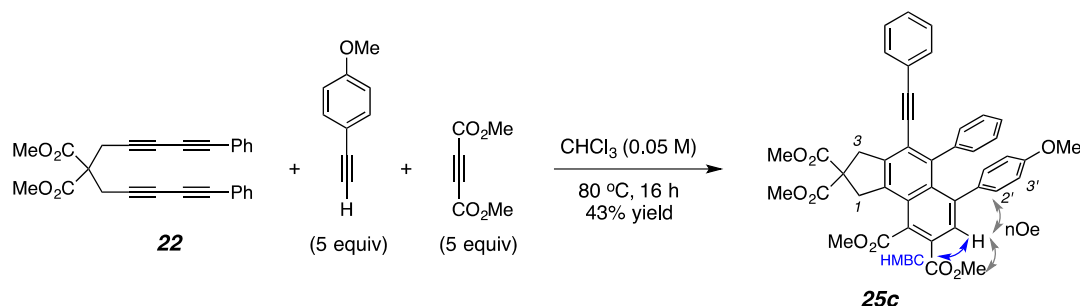

Following general procedure C, the naphthalene derivative **25c** was prepared from a mixture of tetrayne **22**<sup>[18]</sup> (20 mg, 0.049 mmol), 4-methoxyphenylacetylene (33 mg, 0.25 mmol), and dimethyl but-2-ynedioate (36 mg, 0.25 mmol) in CHCl<sub>3</sub> (1.0 mL). The crude product mixture was purified by MPLC (hexanes:EtOAc 3:1) to yield the three-component product **25c** (15 mg, 0.021 mmol, 43%) as an amorphous solid.

<sup>1</sup>H NMR (500 MHz, CDCl<sub>3</sub>): δ 7.80 (s, 1H, NaphC7-*H*), 7.26–7.20 (m, 3H, ≡CPh*H*<sub>*m+p*</sub>), 7.16–7.12 (m, 2H, ≡CPh*H*<sub>*o*</sub>), 7.02–6.98 (m, 3H, C5-Ph*H*<sub>*m+p*</sub>), 6.93–6.90 (m, 2H, C5-Ph*H*<sub>*o*</sub>), 6.77 (nfod, *J* = 8.8 Hz, 2H, *H2'*), 6.49 (nfod, *J* = 8.6 Hz, 2H, *H3'*), 4.15 (s, 3H, C9-CO<sub>2</sub>CH<sub>3</sub>), 4.07 (s, 2H, *H1*), 3.95 (s, 2H, *H3*), 3.92 (s, 3H, C8-CO<sub>2</sub>CH<sub>3</sub>), 3.82 (s, 6H, malonyl-*CH*<sub>3</sub>), and 3.72 (s, 3H, ArOCH<sub>3</sub>).

**nOe & HMBC:** Interactions for the indicated pairs of resonances on structure **25c** supported the assignment of constitution for this product.

$^{13}\text{C}$  NMR (126 MHz,  $\text{CDCl}_3$ )  $\delta$  172.0, 170.9, 166.2, 158.1, 143.6, 143.5, 141.2, 140.8, 135.7, 134.6, 133.8, 131.8, 131.6, 131.4, 131.0, 129.5, 128.7, 128.3, 127.9, 127.1, 126.6, 125.1, 123.0, 122.9, 113.1, 98.8, 87.5, 59.3, 55.5, 53.4, 53.1, 52.8, 41.3, and 41.2.

IR (neat): 3000, 2952, 2837, 2205, 1735, 1511, 1437, 1245, 1203, 1174, 1138, and 757  $\text{cm}^{-1}$ .

HRMS (ESI-TOF): Calcd for  $\text{C}_{42}\text{H}_{34}\text{NaO}_9^+$  [ $\text{M}+\text{Na}^+$ ] requires 705.2095; found 705.2086.

**Tetramethyl 6-(4-(methoxycarbonyl)phenyl)-5-phenyl-4-(phenylethynyl)-1,3-dihydro-2H-cyclopenta[a]naphthalene-2,2,8,9-tetracarboxylate (25d)**

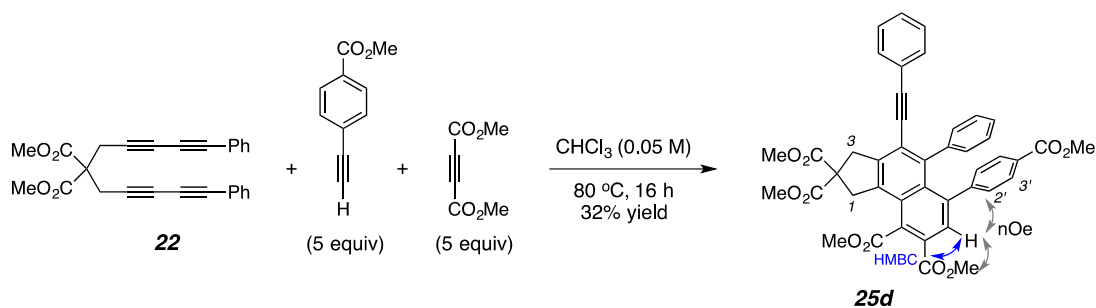

Following general procedure C, the naphthalene derivative **25c** was prepared from a mixture of tetrayne **22**<sup>[18]</sup> (20 mg, 0.049 mmol), 4-methoxycarbonylphenylacetylene (40 mg, 0.25 mmol), and dimethyl but-2-ynedioate (36 mg, 0.25 mmol) in  $\text{CHCl}_3$  (1.0 mL). The crude product mixture was purified by MPLC (hexanes:EtOAc 2.5:1) to yield the three-component product **25c** (11 mg, 0.015 mmol, 32%) as a pale yellow solid.

$^1\text{H}$  NMR (500 MHz,  $\text{CDCl}_3$ ):  $\delta$  7.77 (s, 1H, NaphC7-H), 7.62 (nfod,  $J = 8.4$  Hz, 2H,  $H_{3'}$ ), 7.25–7.20 (m, 3H,  $\equiv\text{CPh}_{m+p}$ ), 7.15–7.12 (m, 2H,  $\equiv\text{CPh}_{H_o}$ ), 6.98–6.95 (m, 3H, C5- $\text{Ph}_{m+p}$ ), 6.95–6.91 (m, 4H, C5- $\text{Ph}_{H_o}$  and  $H_{2'}$ ), 4.15 (s, 3H, C9- $\text{CO}_2\text{CH}_3$ ), 4.08 (s, 2H,  $H_1$ ), 3.96 (s, 2H,  $H_3$ ), 3.93 (s, 3H, C8- $\text{CO}_2\text{CH}_3$ ), 3.90 (s, 3H, C4'- $\text{CO}_2\text{CH}_3$ ), and 3.82 (s, 6H, malonyl- $\text{CH}_3$ ).

**nOe & HMBC:** Interactions for the indicated pairs of resonances on structure **25c** supported the assignment of constitution for this product.

$^{13}\text{C}$  NMR (126 MHz,  $\text{CDCl}_3$ )  $\delta$  172.0, 170.7, 167.0, 165.9, 147.7, 143.1, 142.6, 141.6, 140.3, 134.9, 133.4, 132.7, 131.71, 131.68, 129.8, 129.4, 128.8, 128.7, 128.4, 128.4, 127.8, 127.3, 127.1, 125.1, 123.2, 122.9, 99.2, 87.2, 59.3, 53.4, 53.2, 52.9, 52.2, 41.3, and 41.2.

IR (neat): 3000, 2952, 2844, 2206, 1728, 1726, 1436, 1268, 1239, 1203, 1113, and 758  $\text{cm}^{-1}$ .

HRMS (ESI-TOF): Calcd for  $\text{C}_{43}\text{H}_{34}\text{NaO}_{10}^+$  [ $\text{M}+\text{Na}^+$ ] requires 733.2044; found 733.2017.

Mp: 227–232  $^\circ\text{C}$ .

**(±)-Dimethyl (3a*S*,10c*R*)-4-methyl-1,3-dioxo-2,6-diphenyl-7-(phenylethynyl)-5-(prop-1-yn-1-yl)-2,3,3a,8,10,10c-hexahydroindeno[4,5-*e*]isoindole-9,9(1*H*)-dicarboxylate (25e)**

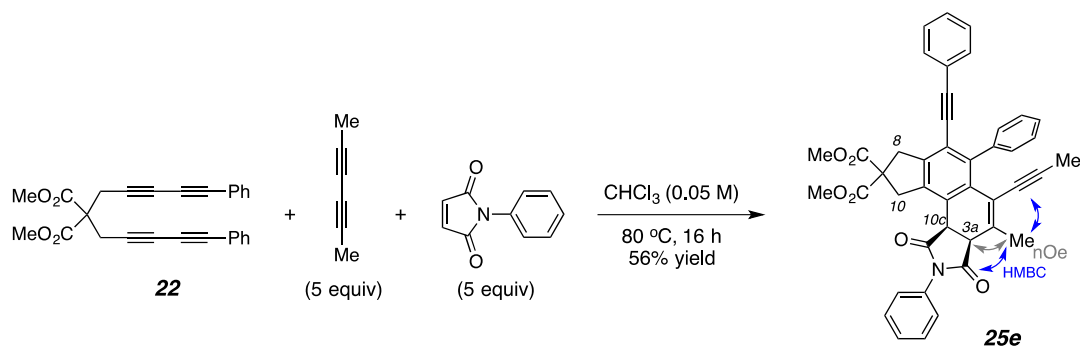

Following general procedure C, the dihydronaphthalene derivative **25e** was prepared from a mixture of tetrayne **22**<sup>[18]</sup> (20 mg, 0.049 mmol), 2,4-hexadiyne (20 mg, 0.25 mmol), and 1-phenyl-1H-pyrrole-2,5-dione (43 mg, 0.25 mmol) in  $\text{CHCl}_3$  (1.0 mL). The crude product mixture was purified by MPLC (hexanes:EtOAc 3:1) to yield the three-component product **25e** (18 mg, 0.027 mmol, 56%) as an amorphous solid.

**<sup>1</sup>H NMR** (500 MHz,  $\text{CDCl}_3$ ):  $\delta$  7.51 (br d,  $J = 7.6$  Hz, 1H, C6-Ph $H_{o-a}$ ), 7.48–7.36 (m, 5H,  $\equiv\text{CPh}H_o$  and C6-Ph $H_{m+p}$ ), 7.33–7.28 (m, 3H,  $\equiv\text{CPh}H_{m+p}$ ), 7.25–7.21 (m, 3H, N-Ph $H_{m+p}$ ), 7.17 (br d,  $J = 7.5$  Hz, 1H, C6-Ph $H_{o-b}$ ), 7.13–7.10 (m, 2H, N-Ph $H_o$ ), 4.44 (d,  $J = 9.3$  Hz, 1H,  $H_{10c}$ ), 4.00 (br d,  $J = 9.5$  Hz, 1H,  $H_{3a}$ ), 3.96 (d,  $J = 17.7$  Hz, 1H,  $H_{8a}$ ), 3.94 (d,  $J = 16.4$  Hz, 1H,  $H_{10a}$ ), 3.81 (d,  $J = 16.5$  Hz, 1H,  $H_{10b}$ ), 3.80 (s, 3H, malonyl- $\text{CH}_{3-a}$ ), 3.77 (s, 3H, malonyl- $\text{CH}_{3-b}$ ), 3.76 (d,  $J = 17.5$  Hz, 1H,  $H_{8b}$ ), 2.16 [d,  $J = 1.4$  Hz, 3H,  $=\text{CCH}_3$ ], and 1.45 [s, 3H,  $\equiv\text{CCH}_3$ ].

**nOe & HMBC**: Interactions for the indicated pairs of resonances on structure **25e** supported the assignment of constitution for this product.

**<sup>13</sup>C NMR** (126 MHz,  $\text{CDCl}_3$ )  $\delta$  175.4, 174.7, 172.3, 171.6, 142.3, 141.6, 141.1, 139.5, 135.4, 131.9, 131.6, 131.6, 131.3, 130.8, 129.3, 128.8, 128.6, 128.3, 127.4, 127.2, 127.0, 126.4, 123.4, 123.4, 121.6, 119.5, 98.0, 97.6, 87.2, 77.4, 59.6, 53.33, 53.28, 47.0, 43.5, 41.3, 40.3, 20.2, and 4.8. The slow rotation of the C6-phenyl ring renders the two pairs of the carbon signals inequivalent (diastereotopic). This is also evident in the <sup>1</sup>H NMR spectrum.

**IR** (neat): 3056, 2953, 2914, 2191, 1734, 1719, 1492, 1376, 1250, 1199, 1167, and 756  $\text{cm}^{-1}$ .

**HRMS** (ESI-TOF): Calcd for  $\text{C}_{43}\text{H}_{33}\text{NNaO}_6^+$  [ $\text{M}+\text{Na}^+$ ] requires 682.2200; found 682.2219.

**(±)-Dimethyl (3aR,10cR)-2-(4-isopropylphenyl)-1,3-dioxo-5,6-diphenyl-7-(phenylethynyl)-2,3,3a,8,10,10c-hexahydroindeno[4,5-e]isoindole-9,9(1H)-dicarboxylate (25f)**

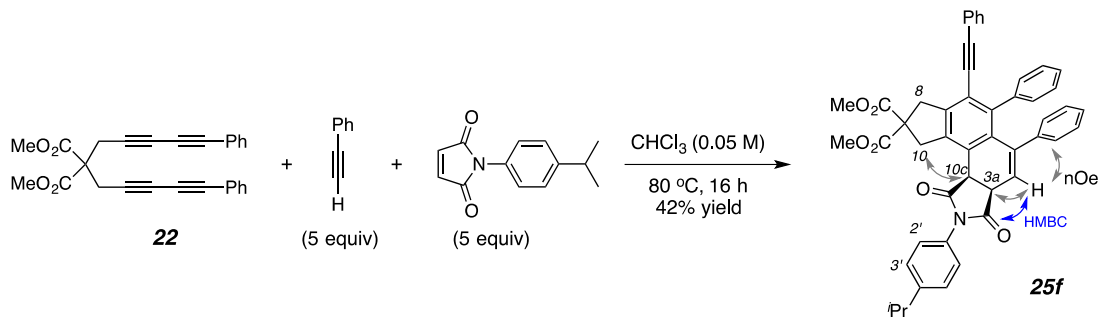

Following general procedure C, the dihydronaphthalene derivative **25f** was prepared from a mixture of tetrayne **22**<sup>[18]</sup> (20 mg, 0.049 mmol), phenylacetylene (26 mg, 0.25 mmol), and 1-(4-isopropylphenyl)-1H-pyrrole-2,5-dione (54 mg, 0.25 mmol) in CHCl<sub>3</sub> (1.0 mL). The crude product mixture was purified by MPLC (hexanes:EtOAc 3:1) to yield the three-component product **25f** (15 mg, 0.021 mmol, 42%) as a pale yellow solid.

**<sup>1</sup>H NMR** (500 MHz, CDCl<sub>3</sub>): δ 7.28 (nfod, *J* = 8.4 Hz, 2H, *H3'*), 7.23–7.20 (m, 3H, ≡CPh $H_{m+p}$ ), 7.18 (nfod, *J* = 8.5 Hz, 2H, *H2'*), 7.13–7.10 (m, 2H, ≡CPh $H_o$ ), 7.07 (br d, *J* = 7.6 Hz, 1H, C6-Ph $H_{o-a}$ ), 7.01 (br ddd, *J* = 7.5, 7.5, 1.3 Hz, 1H, C6-Ph $H_{m-a}$ ), 6.95 (br dddd, *J* = 7.5, 7.5, 1.3, 1.3 Hz, 1H, C6-Ph $H_p$ ), 6.91 (br ddd, *J* = 7.6, 7.6, 1.3 Hz, 1H, C6-Ph $H_{m-b}$ ), 6.89–6.85 (m, 3H, C5-Ph $H_{m+p}$ ), 6.80–6.76 (m, 3H, C5-Ph $H_o$  and C6-Ph $H_{o-b}$ ), 5.72 (d, *J* = 2.1 Hz, 1H, alkene-*H*), 4.46 (d, *J* = 9.2 Hz, 1H, *H10c*), 4.16 (dd, *J* = 9.2, 2.2 Hz, 1H, *H3a*), 4.05 (d, *J* = 16.8 Hz, 1H, *H10a*), 4.03 (d, *J* = 17.6 Hz, 1H, *H8a*), 3.89 (d, *J* = 16.8 Hz, 1H, *H10b*), 3.83 (s, 3H, malonyl-CH<sub>3-a</sub>), 3.79 (s, 3H, malonyl-CH<sub>3-b</sub>), 3.78 (d, *J* = 17.8 Hz, 1H, *H8b*), 2.91 [sep, *J* = 6.8 Hz, 1H, CH(CH<sub>3</sub>)<sub>2</sub>], 1.229 [d, *J* = 6.9 Hz, 3H, CH(CH<sub>3</sub>)<sub>a</sub>(CH<sub>3</sub>)<sub>b</sub>], and 1.227 [d, *J* = 7.0 Hz, 3H, CH(CH<sub>3</sub>)<sub>b</sub>(CH<sub>3</sub>)<sub>a</sub>].

**nOe & HMBC**: The interactions for the indicated pairs of resonances on structure **25f** supported the assignment of constitution for this product.

**<sup>13</sup>C NMR** (126 MHz, CDCl<sub>3</sub>) δ 177.0, 175.1, 172.3, 171.7, 149.6, 143.43, 143.41, 142.2, 141.7, 140.0, 139.9, 131.8, 131.5, 131.4, 130.8, 129.4, 128.34, 128.28, 127.9, 127.5, 127.4, 127.2, 126.7, 126.7, 126.4, 126.3, 126.2, 123.8, 123.4, 121.4, 97.2, 86.9, 59.6, 53.37, 53.35, 43.5, 43.1, 41.5, 40.4, 34.1, and 24.0 (br). The slow rotation of the C6-phenyl ring renders the two pairs of the carbon signals inequivalent (diastereotopic). This is also evident in the <sup>1</sup>H NMR spectrum.

**IR** (neat): 3055, 2957, 2929, 2208, 1736, 1718, 1515, 1492, 1380, 1277, 1166, 1072, 756, and 695 cm<sup>-1</sup>.

**HRMS** (ESI-TOF): Calcd for C<sub>48</sub>H<sub>39</sub>NNaO<sub>6</sub><sup>+</sup> [M+Na<sup>+</sup>] requires 748.2670; found 748.2668.

**Mp**: 163–168 °C.

### Dimethyl 5-(*tert*-butyldimethylsilyl)-7-methyl-3-oxo-6-(prop-1-yn-1-yl)-1,3-dihydronaphtho[1,2-*c*]furan-8,9-dicarboxylate (**25g**)

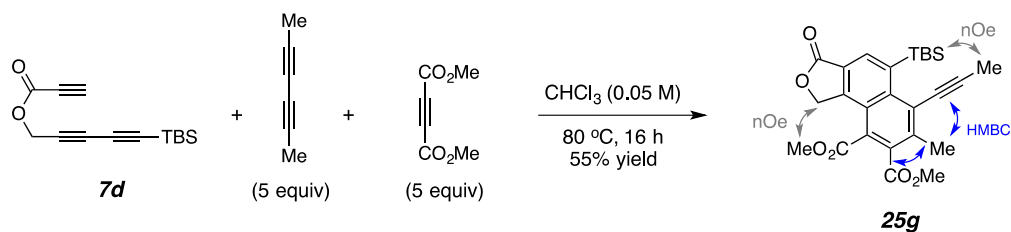

Following general procedure C, the naphthalene derivative **25g** was prepared from a mixture of triyne **7d** (25 mg, 0.10 mmol), 2,4-hexadiyne (39 mg, 0.50 mmol), and dimethyl but-2-ynedioate (72 mg, 0.50

mmol) in  $\text{CHCl}_3$  (2.0 mL). The crude product mixture was purified by MPLC (hexanes:EtOAc 4:1) to yield the three-component product **25g** (26 mg, 0.056 mmol, 55%) as an amorphous white solid.

**$^1\text{H}$  NMR** (500 MHz,  $\text{CDCl}_3$ ):  $\delta$  8.40 (s, 1H, Ar-*H*), 5.43 (s, 2H,  $\text{CH}_2\text{O}$ ), 4.00 (s, 3H, C9- $\text{CO}_2\text{CH}_3$ ), 3.96 (s, 3H, C8- $\text{CO}_2\text{CH}_3$ ), 2.64 (s, 3H, Ar $\text{CH}_3$ ), 2.25 (s, 3H,  $\equiv\text{CCH}_3$ ), 1.05 [s, 9H,  $\text{Si}(\text{CH}_3)_3$ ], and 0.51 [s, 6H,  $\text{Si}(\text{CH}_3)_2$ ].

**nOe & HMBC**: Interactions for the indicated pairs of resonances on structure **25g** supported the assignment of constitution for this product.

**$^{13}\text{C}$  NMR** (126 MHz,  $\text{CDCl}_3$ )  $\delta$  171.0, 168.9, 168.0, 146.6, 142.0, 141.3, 140.5, 132.9, 132.1, 128.4, 127.5, 123.2, 123.2, 104.6, 81.3, 70.0, 53.5, 53.1, 28.6, 20.2, 19.6, 6.4, and 0.0.

**IR** (neat): 2953, 2886, 2858, 2220, 1772, 1735, 1437, 1368, 1260, 1220, 1070, 822, and 761  $\text{cm}^{-1}$ .

**HRMS** (ESI-TOF): Calcd for  $\text{C}_{26}\text{H}_{30}\text{NaO}_6\text{Si}^+$  [ $\text{M}+\text{Na}^+$ ] requires 489.1704; found 489.1709.

### 5-(*tert*-Butyldimethylsilyl)-7,8-dimethyl-6,9-di(prop-1-yn-1-yl)naphtho[1,2-*c*]furan-3(1H)-one (**25h**)

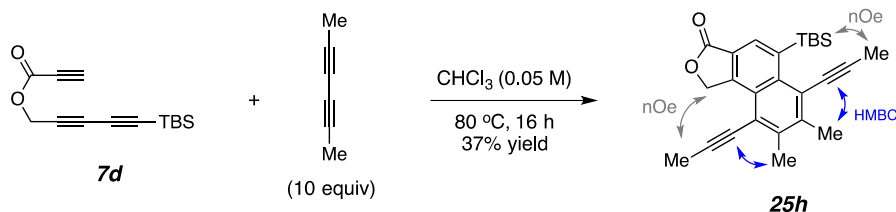

Following general procedure C, the naphthalene derivative **25h** was prepared from a mixture of triyne **7d** (25 mg, 0.10 mmol) and 2,4-hexadiyne (78 mg, 1.0 mmol) in  $\text{CHCl}_3$  (2.0 mL). The crude product mixture was purified by MPLC (hexanes:EtOAc 10:1) to yield the three-component product **25h** (15 mg, 0.037 mmol, 37%) as a white solid.

**$^1\text{H}$  NMR** (500 MHz,  $\text{CDCl}_3$ ):  $\delta$  8.28 (s, 1H, Ar-*H*), 5.95 (s, 2H,  $\text{CH}_2\text{O}$ ), 2.61 (s, 3H, C7- $\text{CH}_3$ ), 2.59 (s, 3H, C8- $\text{CH}_3$ ), 2.25 (s, 3H, C9- $\text{C}\equiv\text{CCH}_3$ ), 2.22 (s, 3H, C6- $\text{C}\equiv\text{CCH}_3$ ), 1.03 [s, 9H,  $\text{Si}(\text{CH}_3)_3$ ], and 0.51 [s, 6H,  $\text{Si}(\text{CH}_3)_2$ ].

**nOe & HMBC**: Interactions for the indicated pairs of resonances on structure **25h** supported the assignment of constitution for this product.

**$^{13}\text{C}$  NMR** (126 MHz,  $\text{CDCl}_3$ )  $\delta$  172.0, 147.9, 143.5, 140.0, 139.93, 139.88, 131.0, 128.0, 123.4, 121.9, 119.9, 101.3, 97.3, 82.6, 79.6, 71.8, 28.6, 19.9, 19.6, 19.1, 6.4, 5.1, and 0.1.

**IR** (neat): 2931, 2913, 2858, 2221, 1762, 1471, 1339, 1249, 1096, 1046, 818, and 763  $\text{cm}^{-1}$ .

**HRMS** (ESI-TOF): Calcd for  $\text{C}_{26}\text{H}_{30}\text{NaO}_2\text{Si}^+$  [ $\text{M}+\text{Na}^+$ ] requires 425.1907; found 425.1923.

**Mp**: 172–176  $^{\circ}\text{C}$ .

**Dimethyl 1,4-Bis(phenylethynyl)-5,6,7,8-tetrahydronaphthalene-2,3-dicarboxylate (**33a**) and Dimethyl 3,4-Bis(phenylethynyl)-5,6,7,8-tetrahydronaphthalene-1,2-dicarboxylate (**33b**)**

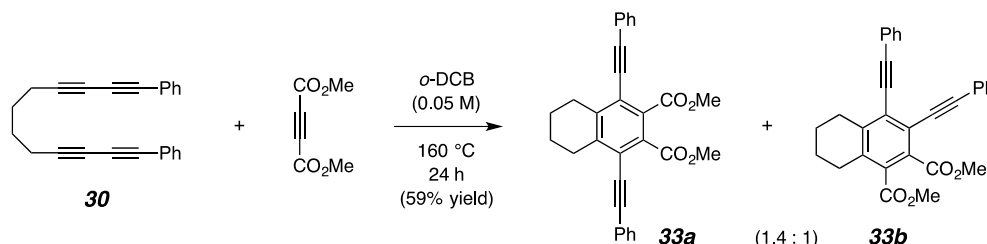

Following general procedure C, the dialkynylbenzene derivatives **33a** and **33b** were prepared from tetrayne **30** (30 mg, 0.098 mmol) and dimethyl but-2-ynedioate (61  $\mu$ L, 0.50 mmol) in *o*-DCB (2.0 mL). The crude product was purified by MPLC (hexanes:EtOAc 2:1) to give a 1.4:1 coeluting mixture of the benzene derivatives **33a** and **33b** (26 mg, 0.058 mmol, 59%) as a pale yellow solid. A portion of the major regioisomer **33a** was obtained as a white solid by recrystallization (hexanes/DCM).

Data for **33a**

**<sup>1</sup>H NMR** (500 MHz, CDCl<sub>3</sub>):  $\delta$  7.55–7.50 (nfom, 4H, PhH<sub>o</sub>), 7.39–7.33 (m, 6H, PhH<sub>m+p</sub>), 3.94 (s, 6H, CO<sub>2</sub>CH<sub>3</sub>), 3.04–2.99 (nfom, 4H, ArCH<sub>2</sub>), and 1.89–1.84 (nfom, 4H, CH<sub>2</sub>CH<sub>2</sub>).

**<sup>13</sup>C NMR** (126 MHz, CDCl<sub>3</sub>)  $\delta$  167.5, 142.4, 132.3, 131.8, 129.0, 128.6, 123.1, 121.6, 100.6, 85.4, 52.7, 29.1, and 22.4.

**IR** (neat): 2939, 2858, 2209, 1730, 1492, 1441, 1348, 1282, 1244, 1163, 1071, 1022, 966, and 755 cm<sup>-1</sup>.

**HRMS** (ESI-TOF): Calcd for C<sub>30</sub>H<sub>24</sub>NaO<sub>4</sub><sup>+</sup> [M+Na<sup>+</sup>] requires 471.1567; found 471.1562.

**Mp**: 208–211 °C.

Data for **33b** (deduced from the spectra mixture)

**<sup>1</sup>H NMR** (500 MHz, CDCl<sub>3</sub>):  $\delta$  7.58–7.55 (nfom, 2H, PhH<sub>o</sub>), 7.55–7.52 (m, 2H, PhH<sub>o</sub>), 7.38–7.31 (m, 6H, PhH<sub>m+p</sub>), 3.94 (s, 3H, C2-CO<sub>2</sub>CH<sub>3</sub>), 3.89 (s, 3H, C1-CO<sub>2</sub>CH<sub>3</sub>), 3.03 (t, *J* = 6.3 Hz, 2H, C5-H<sub>2</sub>), 2.82 (t, *J* = 6.3 Hz, 2H, C8-H<sub>2</sub>), 1.88–1.83 (m, 2H, CH<sub>2</sub>CH<sub>2</sub>), and 1.82–1.76 (nfom, 2H, CH<sub>2</sub>CH<sub>2</sub>).

**<sup>13</sup>C NMR** (126 MHz, CDCl<sub>3</sub>)  $\delta$  168.3, 167.4, 142.8, 135.8, 132.3, 131.8, 131.7, 131.3, 128.9, 128.8, 128.6, 128.5, 128.4, 123.3, 123.2, 122.2, 100.8, 97.5, 86.4, 86.4, 52.7, 52.6, 29.3, 27.6, 22.3, and 22.2.

**IR** (neat): 2946, 2863, 2207, 1733, 1491, 1440, 1347, 1331, 1273, 1223, 1160, 1069, 1025, 912, and 755 cm<sup>-1</sup> (obtained from the mixture).

**HRMS** (ESI-TOF): Calcd for C<sub>30</sub>H<sub>24</sub>NaO<sub>4</sub><sup>+</sup> [M+Na<sup>+</sup>] requires 471.1567; found 471.1559 (obtained from the mixture).

**Mp**: 120–128 °C (obtained from the mixture).

**2-Phenyl-4,5-bis(phenylethynyl)-6,7,8,9-tetrahydro-1H-benzo[e]isoindole-1,3(2H)-dione (36)**  
**and 2-Phenyl-4,9-bis(phenylethynyl)-5,6,7,8-tetrahydro-1H-benzo[f]isoindole-1,3(2H)-dione (36')**

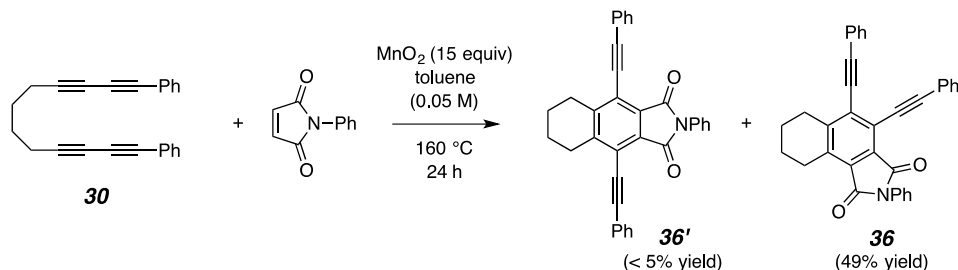

Following general procedure C, the dialkynylbenzene derivatives **36'** and **36** were prepared from tetrayne **30** (31 mg, 0.10 mmol), 1-phenyl-1H-pyrrole-2,5-dione (86 mg, 0.50 mmol), and manganese dioxide (150 mg, ca. 1.5 mmol) in toluene (2.0 mL). The reaction mixture was magnetically stirred. The suspension was filtered by passing through a pad of silica gel, the filtrate was concentrated, and the residue was subsequently purified by MPLC (hexanes:EtOAc 7:1) to yield, in the order of elution, the benzene derivatives **36'** (8 mg) and **36** (24 mg, 0.050 mmol, 49%), the latter as a pale yellow solid. The sample of **36'** was a coeluting mixture of **36'**, **36** (ca. 1:2) and an unidentifiable byproduct as a third component. The ratio of **36** and **36'** was ca. 5:1, as judged from analysis of the  $^1\text{H}$  NMR spectrum of the crude mixture.

Data for **36**

$^1\text{H}$  NMR (500 MHz,  $\text{CDCl}_3$ ):  $\delta$  7.70–7.66 (nfom, 2H,  $\equiv\text{CPhH}_o$ ), 7.65–7.62 (nfom, 2H,  $\equiv\text{CPhH}_o$ ), 7.50 (br t,  $J = 7.5$  Hz, 2H,  $N\text{-PhH}_m$ ), 7.45 (br d,  $J = 7.5$  Hz, 2H,  $N\text{-PhH}_o$ ), 7.42–7.37 (m, 4H,  $\text{PhH}_m$  and 2  $\text{PhH}_p$ ), 7.37–7.32 (m, 3H,  $\text{PhH}_m$  and  $\text{PhH}_p$ ), 3.31 (t,  $J = 6.2$  Hz, 2H,  $\text{C6-H}_2$ ), 3.13 (t,  $J = 6.2$  Hz, 2H,  $\text{C9-H}_2$ ), 1.98–1.90 (nfom, 2H,  $\text{CH}_2\text{CH}_2$ ), and 1.90–1.83 (nfom, 2H,  $\text{CH}_2\text{CH}_2$ ).

$^{13}\text{C}$  NMR (126 MHz,  $\text{CDCl}_3$ )  $\delta$  167.4, 166.0, 147.2, 138.0, 132.3, 132.0, 131.9, 131.7, 129.4, 129.22, 129.21, 128.8, 128.7, 128.5, 128.2, 127.3, 127.0, 123.0, 122.9, 120.2, 103.1, 100.1, 86.3, 84.6, 29.8, 26.2, 22.4, and 21.8.

IR (neat): 3060, 2936, 2868, 2204, 1713, 1597, 1492, 1405, 1374, 1359, 1116, 765, 698, and 624  $\text{cm}^{-1}$ .

HRMS (ESI-TOF): Calcd for  $\text{C}_{34}\text{H}_{23}\text{NNaO}_2^+$  [ $\text{M}+\text{Na}^+$ ] requires 500.1621; found 500.1612.

Mp: 252–255 °C.

$^1\text{H}$  NMR data for **36'** (deduced from the mixture described above)

$^1\text{H}$  NMR (500 MHz,  $\text{CDCl}_3$ ):  $\delta$  7.70–7.66 (m, 4H,  $\equiv\text{CPhH}_o$ ), 7.52–7.47 (m, 4H,  $\equiv\text{CPhH}_m$ ), 7.44–7.36 (m, 7H,  $N\text{-PhH}_5$  and  $\equiv\text{CPhH}_p$ ), 3.16–3.10 (m, 4H,  $\text{ArCH}_2$ ), and 1.97–1.90 (m, 4H,  $\text{CH}_2\text{CH}_2$ ).

### III. Computational methods and results

The DFT calculations were performed using Gaussian 09.<sup>[20]</sup> The geometry of each structure (including the transition structures) was optimized at the B3LYP<sup>[21]</sup>/6-31G(d) level of theory in the gas phase. The nature of the optimized structure was verified by frequency calculation (298K, at the same level of theory). Single point calculations were then performed at the B3LYP-D3BJ<sup>[22,23]</sup>/6-311+G(d,p) level of theory with SMD<sup>[24]</sup>(chloroform) solvation model for each of the previously optimized geometries.

#### **Energetics given in Figure 4 in the manuscript (and, in expanded form, in Figure S1 below)**

For the benzocyclobutadiene (BCB) **10**, an initial Monte Carlo conformational search was performed using MacroModel (version 11.0, MMFF forcefield) and Maestro (version 10.4.017), implemented in the Schrödinger software suite. Each generated conformer was then subjected to a DFT geometry optimization, frequency calculation, and single point calculation sequence using the method described in the above paragraph. The free energy of each conformer was then used to determine the Boltzmann averaged free energy of BCB **10**. Averages due to rotameric populations in **7**, **TS1**, **S17**, and **TS2** (i.e., the species leading to **10**) were assumed to be sufficiently similar that they could be ignored.

Unrestricted (broken-symmetry) calculations were carried out for transition states, and intermediates along the reaction coordinate having diradical character. Energies on the singlet potential energy surface were corrected by spin purification of the mixed-spin-state energies.<sup>[25]</sup>



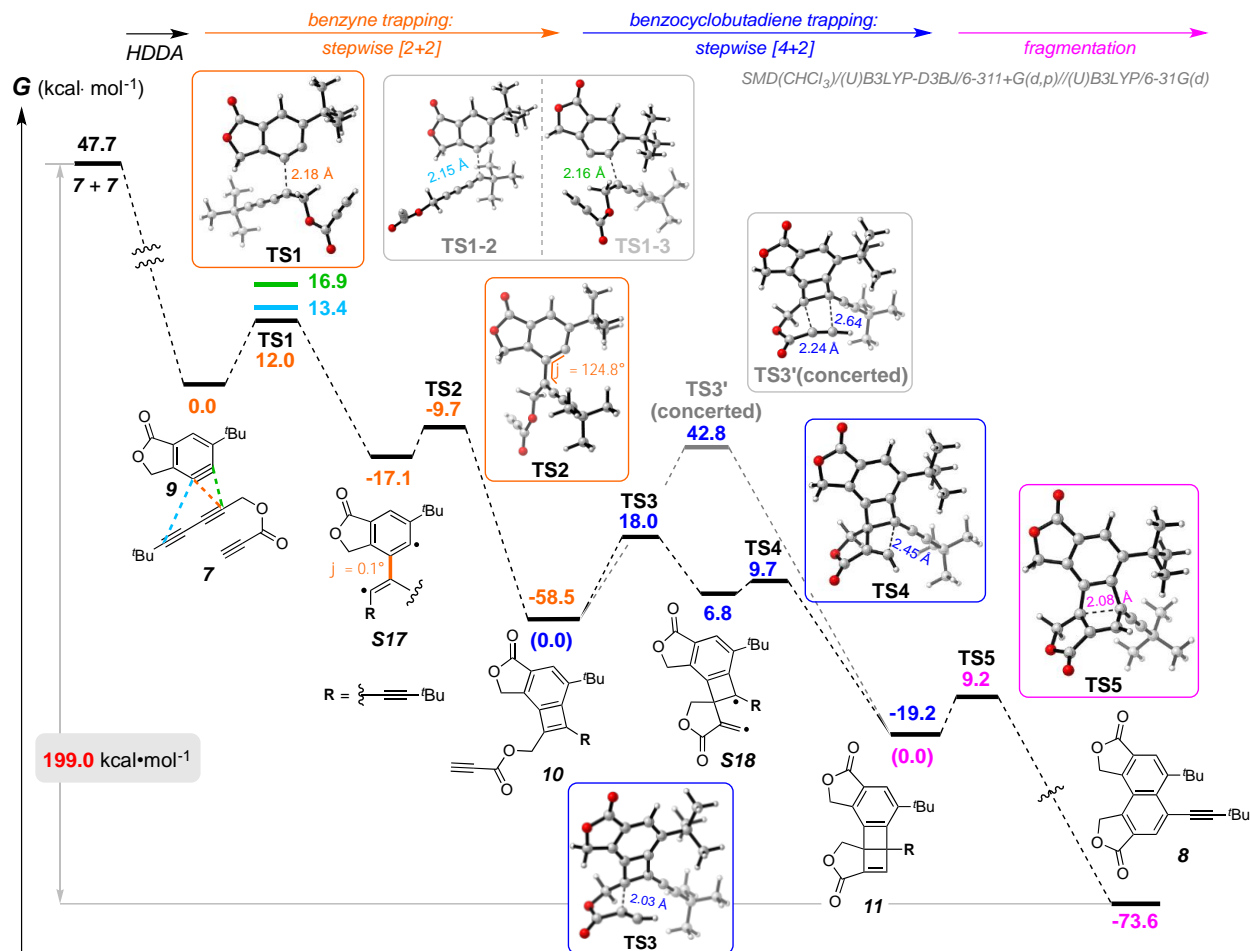

**Figure S1.** Calculated energy profile for the dimerization of 7 to 8.

Listed on the S46–S65 are the zero-point correction, thermal correction to Gibbs free energy, the sum of the electronic and thermal free energies, the Cartesian coordinates at B3LYP/6-31G(d), and electronic energy at SMD(chloroform)/B3LYP-D3BJ/6-311+G(d,p) for each intermediate and transition structure shown in Figure S1. For transition structures, the imaginary frequency values are included. The  $\langle S^2 \rangle$  values and the corrected singlet energies  ${}^1E$  for all of the open-shell calculations are also provided. Three dimensional views of all the transition structures were prepared using CYLview.<sup>[26]</sup>

**7**

Zero-point correction= 0.204648 (Hartree/Particle)  
 Thermal correction to Gibbs Free Energy= 0.157856  
 Sum of electronic and thermal Free Energies= -614.593669  
 E[SMD(chloroform)/B3LYP-D3BJ/6-311+G(d,p)]= -614.9891592

| Center Number | Atomic Number | Atomic Type | Coordinates (Angstroms) |           |           |
|---------------|---------------|-------------|-------------------------|-----------|-----------|
|               |               |             | X                       | Y         | Z         |
| 1             | 6             | 0           | -0.283089               | -0.345852 | -0.001514 |
| 2             | 6             | 0           | 0.926645                | -0.461455 | -0.002045 |
| 3             | 6             | 0           | -1.643111               | -0.217463 | -0.000678 |
| 4             | 6             | 0           | -2.854628               | -0.101905 | 0.000224  |
| 5             | 6             | 0           | -4.317578               | 0.043624  | 0.000715  |
| 6             | 6             | 0           | -4.884714               | -0.495773 | 1.335988  |
| 7             | 1             | 0           | -5.975956               | -0.390629 | 1.345110  |
| 8             | 1             | 0           | -4.639360               | -1.554586 | 1.467969  |
| 9             | 1             | 0           | -4.477501               | 0.058408  | 2.187785  |
| 10            | 6             | 0           | -4.911310               | -0.758636 | -1.182252 |
| 11            | 1             | 0           | -4.522065               | -0.394283 | -2.138429 |
| 12            | 1             | 0           | -4.668156               | -1.822767 | -1.097160 |
| 13            | 1             | 0           | -6.002626               | -0.653591 | -1.190754 |
| 14            | 6             | 0           | -4.676358               | 1.541824  | -0.151874 |
| 15            | 1             | 0           | -5.766015               | 1.662738  | -0.152561 |
| 16            | 1             | 0           | -4.263966               | 2.130473  | 0.673832  |
| 17            | 1             | 0           | -4.283424               | 1.946394  | -1.090114 |
| 18            | 6             | 0           | 2.367685                | -0.642028 | -0.002541 |
| 19            | 1             | 0           | 2.690001                | -1.204073 | 0.882658  |
| 20            | 1             | 0           | 2.689668                | -1.202424 | -0.888918 |
| 21            | 8             | 0           | 3.001341                | 0.663826  | -0.001523 |
| 22            | 6             | 0           | 4.352092                | 0.750911  | 0.000293  |
| 23            | 8             | 0           | 4.896768                | 1.828805  | 0.000886  |
| 24            | 6             | 0           | 5.098425                | -0.498528 | 0.001503  |
| 25            | 6             | 0           | 5.768834                | -1.503950 | 0.002543  |
| 26            | 1             | 0           | 6.377169                | -2.381328 | 0.003501  |

**9**

Zero-point correction= 0.210168 (Hartree/Particle)  
 Thermal correction to Gibbs Free Energy= 0.170825  
 Sum of electronic and thermal Free Energies= -614.672155  
 E[SMD(chloroform)/B3LYP-D3BJ/6-311+G(d,p)]= -615.0781908

| Center Number | Atomic Number | Atomic Type | Coordinates (Angstroms) |           |           |
|---------------|---------------|-------------|-------------------------|-----------|-----------|
|               |               |             | X                       | Y         | Z         |
| 1             | 6             | 0           | -0.522604               | -1.973863 | 0.000203  |
| 2             | 6             | 0           | 0.641608                | -1.514846 | 0.000164  |
| 3             | 6             | 0           | 1.139201                | -0.210987 | 0.000001  |
| 4             | 6             | 0           | 0.038819                | 0.680768  | -0.000013 |
| 5             | 6             | 0           | -1.285925               | 0.213879  | 0.000129  |
| 6             | 6             | 0           | -1.633535               | -1.145058 | 0.000138  |
| 7             | 6             | 0           | -3.129624               | -1.261731 | -0.000066 |
| 8             | 1             | 0           | -3.524579               | -1.767049 | -0.889272 |
| 9             | 1             | 0           | -3.524881               | -1.766995 | 0.889034  |
| 10            | 6             | 0           | -2.545474               | 0.996500  | 0.000391  |
| 11            | 8             | 0           | -3.594727               | 0.100286  | -0.000185 |
| 12            | 8             | 0           | -2.716815               | 2.188915  | -0.000491 |
| 13            | 6             | 0           | 2.612870                | 0.171496  | -0.000004 |
| 14            | 6             | 0           | 2.812260                | 1.696581  | -0.000228 |

|    |   |   |          |           |           |
|----|---|---|----------|-----------|-----------|
| 15 | 1 | 0 | 3.882334 | 1.930439  | -0.000228 |
| 16 | 1 | 0 | 2.371449 | 2.163400  | -0.888353 |
| 17 | 1 | 0 | 2.371395 | 2.163669  | 0.887729  |
| 18 | 6 | 0 | 3.273771 | -0.433027 | -1.260396 |
| 19 | 1 | 0 | 4.348636 | -0.218094 | -1.267318 |
| 20 | 1 | 0 | 3.143491 | -1.520901 | -1.287895 |
| 21 | 1 | 0 | 2.836071 | -0.017676 | -2.175036 |
| 22 | 6 | 0 | 3.273682 | -0.432642 | 1.260622  |
| 23 | 1 | 0 | 4.348544 | -0.217697 | 1.267563  |
| 24 | 1 | 0 | 2.835907 | -0.017018 | 2.175102  |
| 25 | 1 | 0 | 3.143410 | -1.520509 | 1.288440  |
| 26 | 1 | 0 | 0.210269 | 1.752410  | -0.000010 |

**TS1**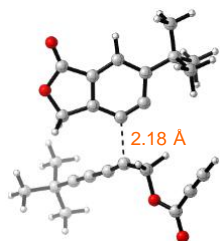Imaginary frequency= -167.93 cm<sup>-1</sup><S<sup>2</sup>>=0.0000

Zero-point correction= 0.414787 (Hartree/Particle)

Thermal correction to Gibbs Free Energy= 0.348141

Sum of electronic and thermal Free Energies= -1229.243521

E[SMD(chloroform)/B3LYP-D3BJ/6-311+G(d,p)]= -1230.067694

E<sup>1</sup>[SMD(chloroform)/B3LYP-D3BJ/6-311+G(d,p)]= -1230.067694

| Center Number | Atomic Number | Atomic Type | Coordinates (Angstroms) |           |           |
|---------------|---------------|-------------|-------------------------|-----------|-----------|
|               |               |             | X                       | Y         | Z         |
| 1             | 6             | 0           | -1.752523               | 1.078733  | 0.037958  |
| 2             | 6             | 0           | -0.580917               | 1.408484  | -0.178570 |
| 3             | 6             | 0           | 0.700573                | -0.356549 | -0.083437 |
| 4             | 6             | 0           | 1.830706                | -0.248644 | 0.493334  |
| 5             | 6             | 0           | 0.236774                | -1.481444 | -0.736099 |
| 6             | 6             | 0           | 2.825539                | -1.244742 | 0.540808  |
| 7             | 6             | 0           | 1.167635                | -2.524916 | -0.722814 |
| 8             | 6             | 0           | -0.982775               | -1.928867 | -1.488203 |
| 9             | 6             | 0           | 2.426782                | -2.430583 | -0.109302 |
| 10            | 6             | 0           | 4.169234                | -1.037562 | 1.237514  |
| 11            | 6             | 0           | 0.571879                | -3.666022 | -1.456287 |
| 12            | 1             | 0           | -1.891102               | -1.939100 | -0.876002 |
| 13            | 1             | 0           | -1.179804               | -1.331633 | -2.386054 |
| 14            | 8             | 0           | -0.681166               | -3.278461 | -1.888276 |
| 15            | 1             | 0           | 3.081159                | -3.295942 | -0.140967 |
| 16            | 6             | 0           | 5.063709                | -2.287786 | 1.169465  |
| 17            | 6             | 0           | 3.904750                | -0.681502 | 2.717952  |
| 18            | 6             | 0           | 4.895723                | 0.143844  | 0.554534  |
| 19            | 8             | 0           | 1.019154                | -4.761659 | -1.684110 |
| 20            | 1             | 0           | 6.013583                | -2.093308 | 1.679606  |
| 21            | 1             | 0           | 4.595225                | -3.148724 | 1.659943  |
| 22            | 1             | 0           | 5.295014                | -2.567352 | 0.135234  |
| 23            | 1             | 0           | 4.847331                | -0.467003 | 3.235724  |
| 24            | 1             | 0           | 3.260226                | 0.200790  | 2.796507  |
| 25            | 1             | 0           | 3.409150                | -1.508184 | 3.239673  |
| 26            | 1             | 0           | 5.841477                | 0.360451  | 1.065692  |

|    |   |   |           |           |           |
|----|---|---|-----------|-----------|-----------|
| 27 | 1 | 0 | 5.118688  | -0.083225 | -0.494526 |
| 28 | 1 | 0 | 4.276074  | 1.047359  | 0.580951  |
| 29 | 6 | 0 | -2.985273 | 0.576756  | 0.285662  |
| 30 | 6 | 0 | -4.101510 | 0.131070  | 0.505975  |
| 31 | 6 | 0 | -5.446140 | -0.387437 | 0.784208  |
| 32 | 6 | 0 | -5.337507 | -1.561425 | 1.788939  |
| 33 | 1 | 0 | -6.339187 | -1.947966 | 2.008901  |
| 34 | 1 | 0 | -4.736353 | -2.378918 | 1.378102  |
| 35 | 1 | 0 | -4.878954 | -1.235360 | 2.727786  |
| 36 | 6 | 0 | -6.093787 | -0.878663 | -0.532981 |
| 37 | 1 | 0 | -6.178049 | -0.063080 | -1.258177 |
| 38 | 1 | 0 | -5.504750 | -1.682342 | -0.986511 |
| 39 | 1 | 0 | -7.099213 | -1.263308 | -0.327448 |
| 40 | 6 | 0 | -6.301007 | 0.749514  | 1.398910  |
| 41 | 1 | 0 | -7.307573 | 0.372989  | 1.614104  |
| 42 | 1 | 0 | -5.860508 | 1.112808  | 2.332614  |
| 43 | 1 | 0 | -6.388677 | 1.594035  | 0.708224  |
| 44 | 6 | 0 | 0.455853  | 2.417168  | -0.443262 |
| 45 | 1 | 0 | 1.233668  | 2.345350  | 0.325769  |
| 46 | 1 | 0 | 0.933479  | 2.232619  | -1.412746 |
| 47 | 8 | 0 | -0.163843 | 3.719387  | -0.432191 |
| 48 | 6 | 0 | 0.598569  | 4.826996  | -0.609104 |
| 49 | 8 | 0 | 0.091623  | 5.922547  | -0.606477 |
| 50 | 6 | 0 | 2.025929  | 4.624249  | -0.797748 |
| 51 | 6 | 0 | 3.217871  | 4.509236  | -0.959745 |
| 52 | 1 | 0 | 4.272432  | 4.425092  | -1.104223 |

## TS1-2

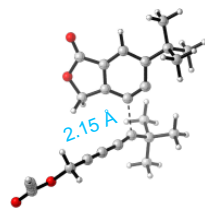

Imaginary frequency=  $-577.18 \text{ cm}^{-1}$

$\langle S^2 \rangle = 0.0000$

Zero-point correction= 0.413794 (Hartree/Particle)

Thermal correction to Gibbs Free Energy= 0.347213

Sum of electronic and thermal Free Energies= -1229.238523

E[SMD(chloroform)/B3LYP-D3BJ/6-311+G(d,p)] = -1230.064515

E<sup>1</sup>[SMD(chloroform)/B3LYP-D3BJ/6-311+G(d,p)] = -1230.064515

| Center Number | Atomic Number | Atomic Type | Coordinates (Angstroms) |           |           |
|---------------|---------------|-------------|-------------------------|-----------|-----------|
|               |               |             | X                       | Y         | Z         |
| 1             | 6             | 0           | -2.060459               | 1.119165  | -0.424538 |
| 2             | 6             | 0           | -3.104125               | 0.557467  | -0.713015 |
| 3             | 6             | 0           | 1.362871                | 0.357515  | 0.186461  |
| 4             | 6             | 0           | 2.301814                | 0.196035  | -0.664689 |
| 5             | 6             | 0           | 1.008975                | -0.549971 | 1.166639  |
| 6             | 6             | 0           | 3.184577                | -0.901642 | -0.703760 |
| 7             | 6             | 0           | 1.830816                | -1.680283 | 1.176771  |
| 8             | 6             | 0           | -0.005015               | -0.679498 | 2.266296  |
| 9             | 6             | 0           | 2.890369                | -1.870899 | 0.276631  |
| 10            | 6             | 0           | 4.310501                | -1.019178 | -1.731214 |
| 11            | 6             | 0           | 1.365587                | -2.564633 | 2.270376  |
| 12            | 1             | 0           | 0.075546                | 0.107597  | 3.025064  |
| 13            | 1             | 0           | -1.038259               | -0.702667 | 1.902301  |

|    |   |   |           |           |           |
|----|---|---|-----------|-----------|-----------|
| 14 | 8 | 0 | 0.294004  | -1.945264 | 2.882628  |
| 15 | 1 | 0 | 3.464737  | -2.789347 | 0.343869  |
| 16 | 6 | 0 | 5.090365  | -2.339251 | -1.597536 |
| 17 | 6 | 0 | 5.284750  | 0.164100  | -1.530433 |
| 18 | 6 | 0 | 3.695755  | -0.933978 | -3.146420 |
| 19 | 8 | 0 | 1.779332  | -3.637670 | 2.630908  |
| 20 | 1 | 0 | 5.884393  | -2.379557 | -2.351513 |
| 21 | 1 | 0 | 5.563961  | -2.434781 | -0.613682 |
| 22 | 1 | 0 | 4.443372  | -3.210360 | -1.751857 |
| 23 | 1 | 0 | 6.081544  | 0.136412  | -2.283384 |
| 24 | 1 | 0 | 4.760252  | 1.121501  | -1.623311 |
| 25 | 1 | 0 | 5.751108  | 0.128341  | -0.539058 |
| 26 | 1 | 0 | 4.483869  | -0.950512 | -3.908860 |
| 27 | 1 | 0 | 3.021251  | -1.777259 | -3.334672 |
| 28 | 1 | 0 | 3.120389  | -0.009471 | -3.264380 |
| 29 | 6 | 0 | -0.909085 | 1.752260  | -0.097662 |
| 30 | 6 | 0 | 0.217739  | 2.175227  | 0.208007  |
| 31 | 6 | 0 | 1.119907  | 3.331607  | 0.520161  |
| 32 | 6 | 0 | 1.987752  | 3.646802  | -0.718514 |
| 33 | 1 | 0 | 2.664166  | 4.477797  | -0.487437 |
| 34 | 1 | 0 | 2.586209  | 2.778496  | -1.009698 |
| 35 | 1 | 0 | 1.363125  | 3.935288  | -1.570494 |
| 36 | 6 | 0 | 2.020876  | 3.045993  | 1.740290  |
| 37 | 1 | 0 | 1.424039  | 2.784519  | 2.621171  |
| 38 | 1 | 0 | 2.719904  | 2.230449  | 1.541299  |
| 39 | 1 | 0 | 2.599830  | 3.944841  | 1.979579  |
| 40 | 6 | 0 | 0.204673  | 4.540869  | 0.834290  |
| 41 | 1 | 0 | 0.820709  | 5.423370  | 1.042501  |
| 42 | 1 | 0 | -0.450035 | 4.768178  | -0.012571 |
| 43 | 1 | 0 | -0.421855 | 4.343296  | 1.710132  |
| 44 | 6 | 0 | -4.329608 | -0.123261 | -1.091202 |
| 45 | 1 | 0 | -4.679241 | 0.228487  | -2.070039 |
| 46 | 1 | 0 | -4.159594 | -1.204686 | -1.168420 |
| 47 | 8 | 0 | -5.336459 | 0.145692  | -0.086677 |
| 48 | 6 | 0 | -6.563983 | -0.423434 | -0.199967 |
| 49 | 8 | 0 | -7.416631 | -0.197173 | 0.622986  |
| 50 | 6 | 0 | -6.784101 | -1.298274 | -1.339934 |
| 51 | 6 | 0 | -7.019928 | -2.033892 | -2.269210 |
| 52 | 1 | 0 | -7.247517 | -2.687694 | -3.082276 |

---

**TS1-3**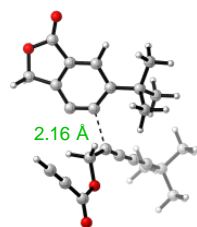Imaginary frequency= -521.17 cm<sup>-1</sup><S<sup>2</sup>>=0.0000

Zero-point correction= 0.414510 (Hartree/Particle)

Thermal correction to Gibbs Free Energy= 0.349612

Sum of electronic and thermal Free Energies= -1229.232937

E[SMD(chloroform)/B3LYP-D3BJ/6-311+G(d,p)]= -1230.061401

E<sup>1</sup>[SMD(chloroform)/B3LYP-D3BJ/6-311+G(d,p)]= -1230.061401

| Center Number | Atomic Number | Atomic Type | Coordinates (Angstroms) |           |           |
|---------------|---------------|-------------|-------------------------|-----------|-----------|
|               |               |             | X                       | Y         | Z         |
| 1             | 6             | 0           | -1.758584               | 0.528612  | -0.276721 |
| 2             | 6             | 0           | -0.674583               | 1.112340  | -0.129930 |
| 3             | 6             | 0           | 1.588224                | -0.127816 | -1.261482 |
| 4             | 6             | 0           | 1.008566                | -0.241151 | -0.120946 |
| 5             | 6             | 0           | 2.800936                | -0.753827 | -1.503226 |
| 6             | 6             | 0           | 1.396401                | -0.968594 | 1.025457  |
| 7             | 6             | 0           | 3.293448                | -1.511206 | -0.440344 |
| 8             | 6             | 0           | 3.763014                | -0.865370 | -2.652377 |
| 9             | 6             | 0           | 2.626872                | -1.622010 | 0.784602  |
| 10            | 6             | 0           | 0.655425                | -1.106309 | 2.364439  |
| 11            | 6             | 0           | 4.574285                | -2.123402 | -0.866368 |
| 12            | 1             | 0           | 3.321204                | -1.330106 | -3.541579 |
| 13            | 1             | 0           | 4.203354                | 0.094513  | -2.946949 |
| 14            | 8             | 0           | 4.815186                | -1.719748 | -2.162895 |
| 15            | 1             | 0           | 3.083328                | -2.226831 | 1.558878  |
| 16            | 6             | 0           | 1.511871                | -1.845134 | 3.414375  |
| 17            | 6             | 0           | -0.639352               | -1.925431 | 2.148847  |
| 18            | 6             | 0           | 0.309408                | 0.283983  | 2.944379  |
| 19            | 8             | 0           | 5.330159                | -2.844108 | -0.264178 |
| 20            | 1             | 0           | 0.958549                | -1.894022 | 4.358386  |
| 21            | 1             | 0           | 1.736553                | -2.874546 | 3.115490  |
| 22            | 1             | 0           | 2.458056                | -1.328087 | 3.609815  |
| 23            | 1             | 0           | -1.175089               | -2.036758 | 3.099598  |
| 24            | 1             | 0           | -1.313139               | -1.445901 | 1.435922  |
| 25            | 1             | 0           | -0.405036               | -2.927709 | 1.772538  |
| 26            | 1             | 0           | -0.166733               | 0.168893  | 3.924985  |
| 27            | 1             | 0           | 1.213303                | 0.889521  | 3.080981  |
| 28            | 1             | 0           | -0.386114               | 0.832226  | 2.305196  |
| 29            | 6             | 0           | -2.875574               | -0.216556 | -0.430444 |
| 30            | 6             | 0           | -3.892824               | -0.878361 | -0.577495 |
| 31            | 6             | 0           | -5.120153               | -1.662392 | -0.757017 |
| 32            | 6             | 0           | -5.150688               | -2.248986 | -2.189307 |
| 33            | 1             | 0           | -6.067689               | -2.832954 | -2.328866 |
| 34            | 1             | 0           | -5.130843               | -1.453061 | -2.940475 |
| 35            | 1             | 0           | -4.293014               | -2.906516 | -2.363479 |
| 36            | 6             | 0           | -6.342977               | -0.735364 | -0.541936 |
| 37            | 1             | 0           | -6.339970               | -0.306699 | 0.465134  |
| 38            | 1             | 0           | -6.346386               | 0.086323  | -1.264989 |
| 39            | 1             | 0           | -7.265876               | -1.312678 | -0.670150 |
| 40            | 6             | 0           | -5.144926               | -2.810332 | 0.282527  |
| 41            | 1             | 0           | -6.061132               | -3.398295 | 0.155884  |

|    |   |   |           |           |           |
|----|---|---|-----------|-----------|-----------|
| 42 | 1 | 0 | -4.286617 | -3.477395 | 0.153490  |
| 43 | 1 | 0 | -5.124990 | -2.417295 | 1.303929  |
| 44 | 6 | 0 | 0.073025  | 2.382657  | -0.115677 |
| 45 | 1 | 0 | 0.716184  | 2.451714  | 0.768020  |
| 46 | 1 | 0 | 0.715238  | 2.426561  | -1.003292 |
| 47 | 8 | 0 | -0.879209 | 3.467332  | -0.124819 |
| 48 | 6 | 0 | -0.441127 | 4.748711  | -0.063288 |
| 49 | 8 | 0 | -1.228564 | 5.663891  | -0.076399 |
| 50 | 6 | 0 | 0.996219  | 4.954104  | 0.017301  |
| 51 | 6 | 0 | 2.181536  | 5.179374  | 0.083795  |
| 52 | 1 | 0 | 3.225623  | 5.394926  | 0.142886  |

**S17** $\langle S^2 \rangle = 1.0410$ 

Zero-point correction= 0.416278 (Hartree/Particle)

Thermal correction to Gibbs Free Energy= 0.349889

Sum of electronic and thermal Free Energies= -1229.293470

E[SMD(chloroform)/B3LYP-D3BJ/6-311+G(d,p)] = -1230.115290

E<sup>1</sup>[SMD(chloroform)/B3LYP-D3BJ/6-311+G(d,p)] = -1230.115857

| Center<br>Number | Atomic<br>Number | Atomic<br>Type | Coordinates (Angstroms) |           |           |
|------------------|------------------|----------------|-------------------------|-----------|-----------|
|                  |                  |                | X                       | Y         | Z         |
| 1                | 6                | 0              | 1.509882                | -0.326835 | 0.002546  |
| 2                | 6                | 0              | 0.366933                | 0.349132  | 0.004701  |
| 3                | 6                | 0              | -0.956360               | -0.299200 | 0.003094  |
| 4                | 6                | 0              | -2.144373               | 0.414993  | 0.003688  |
| 5                | 6                | 0              | -1.161784               | -1.697504 | 0.000518  |
| 6                | 6                | 0              | -3.460009               | -0.031515 | 0.002050  |
| 7                | 6                | 0              | -2.446563               | -2.218191 | -0.000919 |
| 8                | 6                | 0              | -0.193055               | -2.850024 | -0.000694 |
| 9                | 6                | 0              | -3.600464               | -1.429014 | -0.000267 |
| 10               | 6                | 0              | -4.630754               | 0.962439  | 0.002756  |
| 11               | 6                | 0              | -2.355771               | -3.696903 | -0.003122 |
| 12               | 1                | 0              | 0.450898                | -2.872229 | -0.887013 |
| 13               | 1                | 0              | 0.449766                | -2.874804 | 0.886382  |
| 14               | 8                | 0              | -1.020810               | -4.029265 | -0.002932 |
| 15               | 1                | 0              | -4.572959               | -1.909998 | -0.001557 |
| 16               | 6                | 0              | -5.993083               | 0.248681  | 0.000855  |
| 17               | 6                | 0              | -4.526370               | 1.852877  | -1.256490 |
| 18               | 6                | 0              | -4.528029               | 1.849367  | 1.264607  |
| 19               | 8                | 0              | -3.233913               | -4.522964 | -0.004854 |
| 20               | 1                | 0              | -6.798221               | 0.991861  | 0.001321  |
| 21               | 1                | 0              | -6.123351               | -0.379032 | -0.887930 |
| 22               | 1                | 0              | -6.124559               | -0.381450 | 0.887747  |
| 23               | 1                | 0              | -5.334128               | 2.594377  | -1.267616 |
| 24               | 1                | 0              | -3.570711               | 2.388430  | -1.281930 |
| 25               | 1                | 0              | -4.601230               | 1.254083  | -2.171205 |
| 26               | 1                | 0              | -5.335935               | 2.590689  | 1.276859  |
| 27               | 1                | 0              | -4.603860               | 1.248003  | 2.177548  |
| 28               | 1                | 0              | -3.572542               | 2.385085  | 1.292736  |
| 29               | 6                | 0              | 2.810711                | -0.576498 | 0.001007  |
| 30               | 6                | 0              | 4.005962                | -0.906072 | -0.000060 |
| 31               | 6                | 0              | 5.445480                | -1.188228 | -0.005723 |
| 32               | 6                | 0              | 5.722902                | -2.453770 | -0.855085 |
| 33               | 1                | 0              | 6.799104                | -2.662433 | -0.864425 |
| 34               | 1                | 0              | 5.206619                | -3.326811 | -0.442673 |
| 35               | 1                | 0              | 5.390347                | -2.314496 | -1.888786 |
| 36               | 6                | 0              | 5.923084                | -1.421715 | 1.449266  |
| 37               | 1                | 0              | 5.740073                | -0.538079 | 2.068653  |

|    |   |   |           |           |           |
|----|---|---|-----------|-----------|-----------|
| 38 | 1 | 0 | 5.405126  | -2.273213 | 1.902409  |
| 39 | 1 | 0 | 6.999227  | -1.630359 | 1.453662  |
| 40 | 6 | 0 | 6.195340  | 0.024594  | -0.613932 |
| 41 | 1 | 0 | 7.274159  | -0.171529 | -0.613731 |
| 42 | 1 | 0 | 5.877018  | 0.204560  | -1.645614 |
| 43 | 1 | 0 | 6.006213  | 0.933847  | -0.035216 |
| 44 | 6 | 0 | 0.330325  | 1.869890  | 0.006528  |
| 45 | 1 | 0 | -0.194541 | 2.232547  | -0.886280 |
| 46 | 1 | 0 | -0.221485 | 2.229300  | 0.884348  |
| 47 | 8 | 0 | 1.672558  | 2.370005  | 0.028541  |
| 48 | 6 | 0 | 1.907864  | 3.701161  | 0.016835  |
| 49 | 8 | 0 | 3.039489  | 4.123568  | 0.039584  |
| 50 | 6 | 0 | 0.748444  | 4.579053  | -0.023970 |
| 51 | 6 | 0 | -0.174557 | 5.358336  | -0.057169 |
| 52 | 1 | 0 | -0.978159 | 6.060583  | -0.086505 |

**TS2**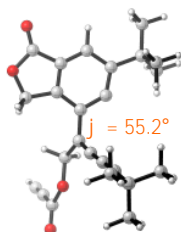

Imaginary frequency=  $-8.13 \text{ cm}^{-1}$

$\langle S^2 \rangle = 1.0319$

Zero-point correction= 0.416306 (Hartree/Particle)

Thermal correction to Gibbs Free Energy= 0.352609

Sum of electronic and thermal Free Energies= -1229.280728

$E[\text{SMD}(\text{chloroform})/\text{B3LYP-D3BJ}/6-311+\text{G}(\text{d,p})] = -1230.106378$

$E^1[\text{SMD}(\text{chloroform})/\text{B3LYP-D3BJ}/6-311+\text{G}(\text{d,p})] = -1230.106727$

| Center Number | Atomic Number | Atomic Type | Coordinates (Angstroms) |           |           |
|---------------|---------------|-------------|-------------------------|-----------|-----------|
|               |               |             | X                       | Y         | Z         |
| 1             | 6             | 0           | -1.566029               | 0.125173  | 0.043047  |
| 2             | 6             | 0           | -0.492259               | 0.868566  | -0.135079 |
| 3             | 6             | 0           | 0.887545                | 0.299858  | 0.024006  |
| 4             | 6             | 0           | 1.310214                | -0.811161 | -0.678675 |
| 5             | 6             | 0           | 1.869881                | 0.809750  | 0.898815  |
| 6             | 6             | 0           | 2.530526                | -1.477202 | -0.650315 |
| 7             | 6             | 0           | 3.110073                | 0.188907  | 0.992132  |
| 8             | 6             | 0           | 1.854481                | 1.946742  | 1.892901  |
| 9             | 6             | 0           | 3.467889                | -0.934170 | 0.243348  |
| 10            | 6             | 0           | 2.779815                | -2.702642 | -1.540347 |
| 11            | 6             | 0           | 3.918804                | 0.891844  | 2.012978  |
| 12            | 1             | 0           | 1.732217                | 2.935166  | 1.434677  |
| 13            | 1             | 0           | 1.083358                | 1.827646  | 2.663218  |
| 14            | 8             | 0           | 3.145479                | 1.912550  | 2.523312  |
| 15            | 1             | 0           | 4.455360                | -1.365207 | 0.373218  |
| 16            | 6             | 0           | 4.185644                | -3.290345 | -1.331482 |
| 17            | 6             | 0           | 2.622668                | -2.279235 | -3.018778 |
| 18            | 6             | 0           | 1.724767                | -3.780972 | -1.203513 |
| 19            | 8             | 0           | 5.042810                | 0.678637  | 2.391136  |
| 20            | 1             | 0           | 4.320145                | -4.162004 | -1.981425 |
| 21            | 1             | 0           | 4.971540                | -2.568272 | -1.580961 |
| 22            | 1             | 0           | 4.339876                | -3.621389 | -0.298123 |
| 23            | 1             | 0           | 2.767785                | -3.141814 | -3.680082 |



|    |   |   |           |           |           |
|----|---|---|-----------|-----------|-----------|
| 24 | 1 | 0 | 1.624077  | -1.869528 | -3.206699 |
| 25 | 1 | 0 | 3.359014  | -1.514423 | -3.291033 |
| 26 | 1 | 0 | 1.856268  | -4.657730 | -1.848826 |
| 27 | 1 | 0 | 1.814202  | -4.108554 | -0.161503 |
| 28 | 1 | 0 | 0.709325  | -3.396922 | -1.350157 |
| 29 | 6 | 0 | -2.533383 | -0.737733 | 0.286285  |
| 30 | 6 | 0 | -3.462164 | -1.529287 | 0.511005  |
| 31 | 6 | 0 | -4.589685 | -2.431410 | 0.771366  |
| 32 | 6 | 0 | -4.637253 | -2.759662 | 2.284515  |
| 33 | 1 | 0 | -5.478457 | -3.432206 | 2.489465  |
| 34 | 1 | 0 | -3.714807 | -3.251587 | 2.609558  |
| 35 | 1 | 0 | -4.769616 | -1.850562 | 2.879755  |
| 36 | 6 | 0 | -4.400233 | -3.737820 | -0.039190 |
| 37 | 1 | 0 | -5.240637 | -4.415717 | 0.150743  |
| 38 | 1 | 0 | -4.360630 | -3.531044 | -1.113536 |
| 39 | 1 | 0 | -3.474357 | -4.247222 | 0.246869  |
| 40 | 6 | 0 | -5.911395 | -1.742111 | 0.346227  |
| 41 | 1 | 0 | -6.067781 | -0.814685 | 0.906026  |
| 42 | 1 | 0 | -5.901361 | -1.499190 | -0.721066 |
| 43 | 1 | 0 | -6.757784 | -2.411640 | 0.540768  |
| 44 | 6 | 0 | -0.565426 | 2.314248  | -0.590041 |
| 45 | 1 | 0 | 0.033400  | 2.965973  | 0.057649  |
| 46 | 1 | 0 | -0.158580 | 2.405104  | -1.606001 |
| 47 | 8 | 0 | -1.935480 | 2.736779  | -0.568611 |
| 48 | 6 | 0 | -2.272607 | 3.982208  | -0.977440 |
| 49 | 8 | 0 | -3.425939 | 4.339797  | -0.966139 |
| 50 | 6 | 0 | -1.191105 | 4.849890  | -1.418676 |
| 51 | 6 | 0 | -0.335023 | 5.616192  | -1.793391 |
| 52 | 1 | 0 | 0.408012  | 6.305935  | -2.128292 |

### 10-confomer1

Zero-point correction= 0.420271 (Hartree/Particle)  
 Thermal correction to Gibbs Free Energy= 0.357918  
 Sum of electronic and thermal Free Energies= -1229.363240  
 E[SMD(chloroform)/B3LYP-D3BJ/6-311+G(d,p)]= -1230.189851  
 Boltzmann%= 31.6%

| Center<br>Number | Atomic<br>Number | Atomic<br>Type | Coordinates (Angstroms) |           |           |
|------------------|------------------|----------------|-------------------------|-----------|-----------|
|                  |                  |                | X                       | Y         | Z         |
| 1                | 6                | 0              | -0.026095               | -0.966685 | -0.110637 |
| 2                | 6                | 0              | 1.148179                | -0.187971 | -0.296709 |
| 3                | 6                | 0              | 2.378706                | -0.769464 | -0.302776 |
| 4                | 6                | 0              | 2.391348                | -2.176491 | -0.118944 |
| 5                | 6                | 0              | 1.254942                | -2.938768 | 0.053504  |
| 6                | 6                | 0              | -0.048561               | -2.334873 | 0.063254  |
| 7                | 1                | 0              | 1.371495                | -4.008197 | 0.187151  |
| 8                | 6                | 0              | -0.844898               | 0.346764  | -0.200037 |
| 9                | 6                | 0              | 0.307376                | 1.060392  | -0.382332 |
| 10               | 6                | 0              | -2.202006               | 0.691206  | -0.132913 |
| 11               | 6                | 0              | -3.382805               | 0.982107  | -0.070497 |
| 12               | 6                | 0              | -4.806648               | 1.345158  | 0.008688  |
| 13               | 6                | 0              | -5.240466               | 1.376061  | 1.494900  |
| 14               | 1                | 0              | -6.300929               | 1.645047  | 1.565846  |
| 15               | 1                | 0              | -5.101000               | 0.397603  | 1.965781  |
| 16               | 1                | 0              | -4.659587               | 2.113067  | 2.058770  |
| 17               | 6                | 0              | -5.013460               | 2.741633  | -0.624571 |
| 18               | 1                | 0              | -4.710916               | 2.744970  | -1.676791 |
| 19               | 1                | 0              | -6.071904               | 3.021181  | -0.569831 |
| 20               | 1                | 0              | -4.429199               | 3.503042  | -0.097615 |

|    |   |   |           |           |           |
|----|---|---|-----------|-----------|-----------|
| 21 | 6 | 0 | -5.645195 | 0.293666  | -0.757099 |
| 22 | 1 | 0 | -5.355813 | 0.252637  | -1.812193 |
| 23 | 1 | 0 | -5.512586 | -0.704184 | -0.326687 |
| 24 | 1 | 0 | -6.708343 | 0.555048  | -0.701162 |
| 25 | 6 | 0 | 3.804213  | -0.309188 | -0.439475 |
| 26 | 1 | 0 | 4.022625  | 0.149766  | -1.410830 |
| 27 | 1 | 0 | 4.108043  | 0.389997  | 0.347784  |
| 28 | 8 | 0 | 4.592936  | -1.510486 | -0.320279 |
| 29 | 6 | 0 | 3.800061  | -2.625606 | -0.135584 |
| 30 | 8 | 0 | 4.264848  | -3.732236 | -0.016621 |
| 31 | 6 | 0 | 0.614808  | 2.486334  | -0.632234 |
| 32 | 1 | 0 | 0.851145  | 2.678728  | -1.687161 |
| 33 | 1 | 0 | -0.222314 | 3.135139  | -0.356923 |
| 34 | 8 | 0 | 1.783902  | 2.819641  | 0.161291  |
| 35 | 6 | 0 | 2.260292  | 4.070791  | -0.023224 |
| 36 | 8 | 0 | 1.769289  | 4.891250  | -0.767469 |
| 37 | 6 | 0 | 3.439397  | 4.295561  | 0.786991  |
| 38 | 6 | 0 | 4.427003  | 4.525175  | 1.441931  |
| 39 | 1 | 0 | 5.300141  | 4.730629  | 2.020828  |
| 40 | 6 | 0 | -1.339414 | -3.146012 | 0.253997  |
| 41 | 6 | 0 | -1.059407 | -4.653288 | 0.406524  |
| 42 | 1 | 0 | -0.559109 | -5.068353 | -0.475758 |
| 43 | 1 | 0 | -0.439911 | -4.869158 | 1.284363  |
| 44 | 1 | 0 | -2.006474 | -5.189766 | 0.531766  |
| 45 | 6 | 0 | -2.066804 | -2.652721 | 1.526887  |
| 46 | 1 | 0 | -1.437074 | -2.783527 | 2.414330  |
| 47 | 1 | 0 | -2.335009 | -1.594256 | 1.453021  |
| 48 | 1 | 0 | -2.990585 | -3.224327 | 1.680234  |
| 49 | 6 | 0 | -2.255291 | -2.942170 | -0.975526 |
| 50 | 1 | 0 | -2.527046 | -1.890173 | -1.106103 |
| 51 | 1 | 0 | -1.762804 | -3.283470 | -1.893261 |
| 52 | 1 | 0 | -3.182299 | -3.516449 | -0.855653 |

## 10-confomer2

Zero-point correction= 0.420797 (Hartree/Particle)

Thermal correction to Gibbs Free Energy= 0.359874

Sum of electronic and thermal Free Energies= -1229.363185

E[SMD(chloroform)/B3LYP-D3BJ/6-311+G(d,p)]= -1230.191283

Boltzmann%= 21.0%

| Center<br>Number | Atomic<br>Number | Atomic<br>Type | Coordinates (Angstroms) |           |           |
|------------------|------------------|----------------|-------------------------|-----------|-----------|
|                  |                  |                | X                       | Y         | Z         |
| 1                | 6                | 0              | 1.999484                | 3.618064  | 0.112757  |
| 2                | 8                | 0              | 0.667214                | 3.460116  | 0.014761  |
| 3                | 6                | 0              | 2.336385                | 4.524007  | 1.190302  |
| 4                | 8                | 0              | 2.820971                | 3.081287  | -0.604245 |
| 5                | 6                | 0              | 0.203060                | 2.582063  | -1.059619 |
| 6                | 6                | 0              | 0.173075                | 1.156380  | -0.651294 |
| 7                | 6                | 0              | -0.863183               | 0.317214  | -0.343061 |
| 8                | 6                | 0              | -2.254158               | 0.481580  | -0.284805 |
| 9                | 6                | 0              | -3.462954               | 0.618588  | -0.229707 |
| 10               | 6                | 0              | -4.921312               | 0.801239  | -0.160986 |
| 11               | 6                | 0              | -5.264646               | 1.674390  | 1.071004  |
| 12               | 6                | 0              | -5.406112               | 1.506734  | -1.450785 |
| 13               | 6                | 0              | -5.607009               | -0.579121 | -0.030150 |
| 14               | 6                | 0              | 2.670068                | 5.271584  | 2.077247  |
| 15               | 6                | 0              | 0.125066                | -0.848990 | -0.122027 |
| 16               | 6                | 0              | 1.184128                | 0.045274  | -0.442351 |
| 17               | 6                | 0              | 2.477224                | -0.388469 | -0.454918 |

|    |   |   |           |           |           |
|----|---|---|-----------|-----------|-----------|
| 18 | 6 | 0 | 2.663092  | -1.757315 | -0.124228 |
| 19 | 6 | 0 | 1.639083  | -2.624855 | 0.190476  |
| 20 | 6 | 0 | 0.274163  | -2.181979 | 0.199366  |
| 21 | 6 | 0 | 4.110722  | -2.054500 | -0.195062 |
| 22 | 8 | 0 | 4.756892  | -0.897258 | -0.561015 |
| 23 | 6 | 0 | 3.834051  | 0.200025  | -0.738578 |
| 24 | 6 | 0 | -0.901100 | -3.115514 | 0.527628  |
| 25 | 6 | 0 | -0.430518 | -4.544894 | 0.857948  |
| 26 | 6 | 0 | -1.667850 | -2.561333 | 1.751208  |
| 27 | 6 | 0 | -1.850028 | -3.186324 | -0.691824 |
| 28 | 8 | 0 | 4.698494  | -3.088779 | 0.010212  |
| 29 | 1 | 0 | -0.809391 | 2.932855  | -1.265800 |
| 30 | 1 | 0 | 0.843291  | 2.740963  | -1.931397 |
| 31 | 1 | 0 | -6.349721 | 1.819185  | 1.130573  |
| 32 | 1 | 0 | -4.929135 | 1.196602  | 1.997063  |
| 33 | 1 | 0 | -4.788494 | 2.657768  | 1.001531  |
| 34 | 1 | 0 | -6.492009 | 1.650921  | -1.408733 |
| 35 | 1 | 0 | -4.933211 | 2.487755  | -1.564029 |
| 36 | 1 | 0 | -5.172382 | 0.908793  | -2.337615 |
| 37 | 1 | 0 | -6.694237 | -0.449770 | 0.022922  |
| 38 | 1 | 0 | -5.377655 | -1.215531 | -0.890961 |
| 39 | 1 | 0 | -5.276911 | -1.097274 | 0.875961  |
| 40 | 1 | 0 | 2.965700  | 5.932038  | 2.862064  |
| 41 | 1 | 0 | 1.892912  | -3.651782 | 0.426978  |
| 42 | 1 | 0 | 4.111535  | 1.005242  | -0.053257 |
| 43 | 1 | 0 | 3.938278  | 0.578319  | -1.760753 |
| 44 | 1 | 0 | -1.300325 | -5.171730 | 1.083998  |
| 45 | 1 | 0 | 0.099046  | -5.007062 | 0.017205  |
| 46 | 1 | 0 | 0.229596  | -4.567931 | 1.732412  |
| 47 | 1 | 0 | -2.507976 | -3.220965 | 2.001785  |
| 48 | 1 | 0 | -1.013621 | -2.499503 | 2.628386  |
| 49 | 1 | 0 | -2.071187 | -1.562753 | 1.557499  |
| 50 | 1 | 0 | -2.695199 | -3.851767 | -0.476102 |
| 51 | 1 | 0 | -2.254408 | -2.202018 | -0.946769 |
| 52 | 1 | 0 | -1.327443 | -3.578389 | -1.571900 |

### 10-conformer3

Zero-point correction= 0.420440 (Hartree/Particle)

Thermal correction to Gibbs Free Energy= 0.357948

Sum of electronic and thermal Free Energies= -1229.362687

E[SMD(chloroform)/B3LYP-D3BJ/6-311+G(d,p)]= -1230.190068

Boltzmann%= 36.6%

| Center<br>Number | Atomic<br>Number | Atomic<br>Type | Coordinates (Angstroms) |           |           |
|------------------|------------------|----------------|-------------------------|-----------|-----------|
|                  |                  |                | X                       | Y         | Z         |
| 1                | 6                | 0              | -0.911867               | -3.845899 | 0.531780  |
| 2                | 8                | 0              | -1.215669               | -3.276777 | -0.660241 |
| 3                | 6                | 0              | -2.076186               | -4.504248 | 1.087476  |
| 4                | 8                | 0              | 0.176700                | -3.817257 | 1.059955  |
| 5                | 6                | 0              | -0.144295               | -2.528127 | -1.297395 |
| 6                | 6                | 0              | -0.141676               | -1.122051 | -0.824392 |
| 7                | 6                | 0              | 0.825511                | -0.223338 | -0.466536 |
| 8                | 6                | 0              | 2.222336                | -0.282295 | -0.373955 |
| 9                | 6                | 0              | 3.435794                | -0.329307 | -0.285632 |
| 10               | 6                | 0              | 4.899868                | -0.412627 | -0.167642 |
| 11               | 6                | 0              | 5.258881                | -1.057496 | 1.194049  |
| 12               | 6                | 0              | 5.455163                | -1.284363 | -1.319501 |
| 13               | 6                | 0              | 5.504662                | 1.009011  | -0.247999 |
| 14               | 6                | 0              | -3.020764               | -5.061376 | 1.592078  |

|    |   |   |           |           |           |
|----|---|---|-----------|-----------|-----------|
| 15 | 6 | 0 | -0.258513 | 0.856888  | -0.219817 |
| 16 | 6 | 0 | -1.233762 | -0.108184 | -0.590552 |
| 17 | 6 | 0 | -2.560040 | 0.197281  | -0.575451 |
| 18 | 6 | 0 | -2.879188 | 1.521303  | -0.176347 |
| 19 | 6 | 0 | -1.937019 | 2.464475  | 0.177210  |
| 20 | 6 | 0 | -0.534674 | 2.151736  | 0.167163  |
| 21 | 6 | 0 | -4.350713 | 1.662948  | -0.203303 |
| 22 | 8 | 0 | -4.880854 | 0.452215  | -0.602890 |
| 23 | 6 | 0 | -3.849908 | -0.522378 | -0.860938 |
| 24 | 6 | 0 | 0.546813  | 3.170353  | 0.559416  |
| 25 | 6 | 0 | 1.333538  | 2.632484  | 1.777738  |
| 26 | 6 | 0 | 1.512833  | 3.371842  | -0.631668 |
| 27 | 6 | 0 | -0.054654 | 4.538224  | 0.933988  |
| 28 | 8 | 0 | -5.045719 | 2.613381  | 0.058456  |
| 29 | 1 | 0 | 0.816912  | -3.010427 | -1.107394 |
| 30 | 1 | 0 | -0.385608 | -2.592762 | -2.364049 |
| 31 | 1 | 0 | 6.348325  | -1.131889 | 1.292295  |
| 32 | 1 | 0 | 4.877514  | -0.456415 | 2.025688  |
| 33 | 1 | 0 | 4.834511  | -2.063033 | 1.277133  |
| 34 | 1 | 0 | 6.545588  | -1.359299 | -1.235549 |
| 35 | 1 | 0 | 5.037198  | -2.295663 | -1.283290 |
| 36 | 1 | 0 | 5.214292  | -0.848287 | -2.294587 |
| 37 | 1 | 0 | 6.595424  | 0.953854  | -0.154304 |
| 38 | 1 | 0 | 5.264923  | 1.485214  | -1.204321 |
| 39 | 1 | 0 | 5.121551  | 1.644898  | 0.556578  |
| 40 | 1 | 0 | -3.853805 | -5.554789 | 2.041735  |
| 41 | 1 | 0 | -2.282885 | 3.449312  | 0.469402  |
| 42 | 1 | 0 | -4.013887 | -1.387765 | -0.208693 |
| 43 | 1 | 0 | -3.943346 | -0.854258 | -1.901543 |
| 44 | 1 | 0 | 2.109942  | 3.349210  | 2.072966  |
| 45 | 1 | 0 | 0.670202  | 2.479781  | 2.636709  |
| 46 | 1 | 0 | 1.822884  | 1.679903  | 1.553028  |
| 47 | 1 | 0 | 2.289091  | 4.101260  | -0.369665 |
| 48 | 1 | 0 | 2.010973  | 2.437896  | -0.909759 |
| 49 | 1 | 0 | 0.978483  | 3.748401  | -1.511462 |
| 50 | 1 | 0 | 0.751144  | 5.231105  | 1.200568  |
| 51 | 1 | 0 | -0.610710 | 4.983730  | 0.101267  |
| 52 | 1 | 0 | -0.727233 | 4.468403  | 1.796378  |

## 10-confomer4

Zero-point correction= 0.420194 (Hartree/Particle)

Thermal correction to Gibbs Free Energy= 0.358126

Sum of electronic and thermal Free Energies= -1229.360700

E[SMD(chloroform)/B3LYP-D3BJ/6-311+G(d,p)]= -1230.188685

Boltzmann%= 10.8%

| Center<br>Number | Atomic<br>Number | Atomic<br>Type | Coordinates (Angstroms) |           |           |
|------------------|------------------|----------------|-------------------------|-----------|-----------|
|                  |                  |                | X                       | Y         | Z         |
| 1                | 6                | 0              | 3.001530                | -3.369237 | -0.000100 |
| 2                | 8                | 0              | 2.180411                | -2.298646 | -0.000039 |
| 3                | 6                | 0              | 4.389730                | -2.953595 | -0.000420 |
| 4                | 8                | 0              | 2.630518                | -4.522753 | 0.000097  |
| 5                | 6                | 0              | 0.774888                | -2.605044 | 0.000259  |
| 6                | 6                | 0              | 0.013914                | -1.333846 | 0.000156  |
| 7                | 6                | 0              | 0.320662                | -0.000858 | 0.000092  |
| 8                | 6                | 0              | 1.513289                | 0.735037  | 0.000118  |
| 9                | 6                | 0              | 2.543431                | 1.382656  | 0.000155  |
| 10               | 6                | 0              | 3.826430                | 2.102136  | 0.000198  |
| 11               | 6                | 0              | 4.624951                | 1.701402  | 1.264979  |

|    |   |   |           |           |           |
|----|---|---|-----------|-----------|-----------|
| 12 | 6 | 0 | 4.625326  | 1.700846  | -1.264168 |
| 13 | 6 | 0 | 3.573451  | 3.627329  | -0.000170 |
| 14 | 6 | 0 | 5.561870  | -2.664135 | -0.000681 |
| 15 | 6 | 0 | -1.186238 | 0.353588  | 0.000001  |
| 16 | 6 | 0 | -1.468184 | -1.040260 | 0.000074  |
| 17 | 6 | 0 | -2.753164 | -1.492502 | 0.000103  |
| 18 | 6 | 0 | -3.755513 | -0.486319 | 0.000017  |
| 19 | 6 | 0 | -3.486868 | 0.865951  | -0.000076 |
| 20 | 6 | 0 | -2.136021 | 1.353569  | -0.000086 |
| 21 | 6 | 0 | -5.074374 | -1.152395 | 0.000015  |
| 22 | 8 | 0 | -4.854599 | -2.516508 | 0.000086  |
| 23 | 6 | 0 | -3.448646 | -2.828745 | 0.000170  |
| 24 | 6 | 0 | -1.792804 | 2.851585  | -0.000176 |
| 25 | 6 | 0 | -3.055339 | 3.734432  | -0.000375 |
| 26 | 6 | 0 | -0.965154 | 3.184276  | 1.263626  |
| 27 | 6 | 0 | -0.964921 | 3.184084  | -1.263879 |
| 28 | 8 | 0 | -6.184605 | -0.681847 | -0.000045 |
| 29 | 1 | 0 | 0.533274  | -3.218350 | -0.879175 |
| 30 | 1 | 0 | 0.533592  | -3.218022 | 0.880014  |
| 31 | 1 | 0 | 5.591897  | 2.218522  | 1.272481  |
| 32 | 1 | 0 | 4.081657  | 1.974055  | 2.175576  |
| 33 | 1 | 0 | 4.806954  | 0.622020  | 1.284862  |
| 34 | 1 | 0 | 5.592306  | 2.217905  | -1.271579 |
| 35 | 1 | 0 | 4.807261  | 0.621443  | -1.283559 |
| 36 | 1 | 0 | 4.082332  | 1.973165  | -2.175044 |
| 37 | 1 | 0 | 4.529768  | 4.163332  | -0.000145 |
| 38 | 1 | 0 | 3.008538  | 3.932311  | -0.887196 |
| 39 | 1 | 0 | 3.008276  | 3.932694  | 0.886557  |
| 40 | 1 | 0 | 6.601140  | -2.420186 | -0.000909 |
| 41 | 1 | 0 | -4.324819 | 1.553436  | -0.000146 |
| 42 | 1 | 0 | -3.230614 | -3.432794 | 0.889015  |
| 43 | 1 | 0 | -3.230533 | -3.432931 | -0.888561 |
| 44 | 1 | 0 | -2.762294 | 4.790113  | -0.000455 |
| 45 | 1 | 0 | -3.674542 | 3.564090  | -0.888371 |
| 46 | 1 | 0 | -3.674700 | 3.564275  | 0.887546  |
| 47 | 1 | 0 | -0.714384 | 4.252154  | 1.280506  |
| 48 | 1 | 0 | -1.530855 | 2.955562  | 2.174181  |
| 49 | 1 | 0 | -0.028580 | 2.619254  | 1.292954  |
| 50 | 1 | 0 | -0.714151 | 4.251961  | -1.280869 |
| 51 | 1 | 0 | -0.028338 | 2.619067  | -1.292962 |
| 52 | 1 | 0 | -1.530457 | 2.955237  | -2.174501 |

### TS3-concerted

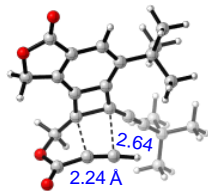

Imaginary frequency= -317.17 cm<sup>-1</sup>

Zero-point correction= 0.418109 (Hartree/Particle)

Thermal correction to Gibbs Free Energy= 0.358838

Sum of electronic and thermal Free Energies= -1229.285602

E[SMD(chloroform)/B3LYP-D3BJ/6-311+G(d,p)]= -1230.122314

| Center Number | Atomic Number | Atomic Type | Coordinates (Angstroms) |           |           |
|---------------|---------------|-------------|-------------------------|-----------|-----------|
|               |               |             | X                       | Y         | Z         |
| 1             | 6             | 0           | 0.396489                | -0.547126 | -0.108744 |

|    |   |   |           |           |           |
|----|---|---|-----------|-----------|-----------|
| 2  | 6 | 0 | 1.276420  | 0.586559  | -0.501378 |
| 3  | 6 | 0 | 2.680968  | 0.387010  | -0.579753 |
| 4  | 6 | 0 | 3.115319  | -0.876057 | -0.305924 |
| 5  | 6 | 0 | 2.269544  | -1.991573 | 0.065735  |
| 6  | 6 | 0 | 0.907698  | -1.874658 | 0.183212  |
| 7  | 1 | 0 | 2.774444  | -2.932306 | 0.251545  |
| 8  | 6 | 0 | -0.741911 | 0.236792  | -0.190237 |
| 9  | 6 | 0 | 0.235079  | 1.481558  | -0.578105 |
| 10 | 6 | 0 | -0.077522 | 2.484444  | 1.397200  |
| 11 | 6 | 0 | -0.773614 | 1.687470  | 2.018081  |
| 12 | 6 | 0 | 0.627275  | 3.694958  | 0.974957  |
| 13 | 8 | 0 | 1.136117  | 4.489282  | 1.727697  |
| 14 | 8 | 0 | 0.684086  | 3.863163  | -0.371588 |
| 15 | 6 | 0 | 0.017392  | 2.836973  | -1.156643 |
| 16 | 1 | 0 | 0.442069  | 2.953677  | -2.158691 |
| 17 | 1 | 0 | -1.054834 | 3.057417  | -1.203729 |
| 18 | 1 | 0 | -1.396598 | 1.075898  | 2.631890  |
| 19 | 6 | 0 | -2.122496 | 0.092664  | -0.272194 |
| 20 | 6 | 0 | -3.339210 | 0.031873  | -0.367156 |
| 21 | 6 | 0 | -4.802059 | -0.058510 | -0.494811 |
| 22 | 6 | 0 | -5.444886 | 1.247409  | 0.031504  |
| 23 | 1 | 0 | -6.535810 | 1.189796  | -0.059873 |
| 24 | 1 | 0 | -5.196178 | 1.411428  | 1.085103  |
| 25 | 1 | 0 | -5.097833 | 2.114557  | -0.539958 |
| 26 | 6 | 0 | -5.312610 | -1.262476 | 0.332723  |
| 27 | 1 | 0 | -6.402152 | -1.341132 | 0.241613  |
| 28 | 1 | 0 | -4.869050 | -2.198799 | -0.021190 |
| 29 | 1 | 0 | -5.063908 | -1.145265 | 1.392592  |
| 30 | 6 | 0 | -5.175754 | -0.257183 | -1.985017 |
| 31 | 1 | 0 | -4.821743 | 0.581514  | -2.593299 |
| 32 | 1 | 0 | -4.733790 | -1.177162 | -2.380939 |
| 33 | 1 | 0 | -6.265131 | -0.323574 | -2.090507 |
| 34 | 6 | 0 | -0.013354 | -3.033132 | 0.572624  |
| 35 | 6 | 0 | 0.775596  | -4.315970 | 0.893279  |
| 36 | 1 | 0 | 0.077761  | -5.112187 | 1.174751  |
| 37 | 1 | 0 | 1.348264  | -4.670625 | 0.029145  |
| 38 | 1 | 0 | 1.469096  | -4.171158 | 1.729263  |
| 39 | 6 | 0 | -0.833100 | -2.639893 | 1.825146  |
| 40 | 1 | 0 | -0.172408 | -2.427680 | 2.673627  |
| 41 | 1 | 0 | -1.455533 | -1.758930 | 1.644187  |
| 42 | 1 | 0 | -1.495753 | -3.465421 | 2.110730  |
| 43 | 6 | 0 | -0.974523 | -3.331549 | -0.603958 |
| 44 | 1 | 0 | -0.414924 | -3.625818 | -1.499157 |
| 45 | 1 | 0 | -1.644229 | -4.158015 | -0.336722 |
| 46 | 1 | 0 | -1.592910 | -2.465313 | -0.855939 |
| 47 | 6 | 0 | 4.588539  | -0.900970 | -0.445557 |
| 48 | 6 | 0 | 3.864449  | 1.251135  | -0.903826 |
| 49 | 1 | 0 | 3.834876  | 1.663057  | -1.919932 |
| 50 | 1 | 0 | 3.996030  | 2.082813  | -0.201206 |
| 51 | 8 | 0 | 4.994386  | 0.370357  | -0.797879 |
| 52 | 8 | 0 | 5.361394  | -1.814709 | -0.297013 |

---

## TS3

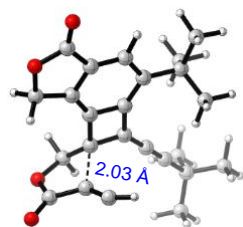

Imaginary frequency=  $-722.46 \text{ cm}^{-1}$

$\langle S^2 \rangle = 0.4801$

Zero-point correction= 0.417976 (Hartree/Particle)

Thermal correction to Gibbs Free Energy= 0.357844

Sum of electronic and thermal Free Energies= -1229.324080

E[SMD(chloroform)/B3LYP-D3BJ/6-311+G(d,p)]= -1230.155231

E<sup>‡</sup>[SMD(chloroform)/B3LYP-D3BJ/6-311+G(d,p)]= -1230.160849

| Center Number | Atomic Number | Atomic Type | Coordinates (Angstroms) |           |           |
|---------------|---------------|-------------|-------------------------|-----------|-----------|
|               |               |             | X                       | Y         | Z         |
| 1             | 6             | 0           | 0.411924                | -0.622501 | -0.108599 |
| 2             | 6             | 0           | 1.282221                | 0.477296  | -0.328036 |
| 3             | 6             | 0           | 2.638139                | 0.309007  | -0.368432 |
| 4             | 6             | 0           | 3.089554                | -1.013762 | -0.176170 |
| 5             | 6             | 0           | 2.249666                | -2.098392 | 0.040434  |
| 6             | 6             | 0           | 0.838831                | -1.941178 | 0.082163  |
| 7             | 1             | 0           | 2.706307                | -3.071684 | 0.178701  |
| 8             | 6             | 0           | -0.763655               | 0.293263  | -0.227089 |
| 9             | 6             | 0           | 0.095981                | 1.431928  | -0.378678 |
| 10            | 6             | 0           | 0.337990                | 2.661594  | 1.217767  |
| 11            | 6             | 0           | 0.272067                | 2.274664  | 2.403454  |
| 12            | 6             | 0           | 0.699572                | 3.888703  | 0.458586  |
| 13            | 8             | 0           | 1.154081                | 4.890210  | 0.948976  |
| 14            | 8             | 0           | 0.504673                | 3.782314  | -0.877076 |
| 15            | 6             | 0           | -0.169815               | 2.586724  | -1.298901 |
| 16            | 1             | 0           | 0.198422                | 2.380897  | -2.309809 |
| 17            | 1             | 0           | -1.247608               | 2.780585  | -1.347907 |
| 18            | 1             | 0           | 0.089603                | 1.577620  | 3.195896  |
| 19            | 6             | 0           | -2.147728               | 0.172039  | -0.217321 |
| 20            | 6             | 0           | -3.367725               | 0.088909  | -0.211587 |
| 21            | 6             | 0           | -4.835437               | -0.007040 | -0.212130 |
| 22            | 6             | 0           | -5.430746               | 1.294530  | 0.377005  |
| 23            | 1             | 0           | -6.525206               | 1.234473  | 0.376331  |
| 24            | 1             | 0           | -5.094920               | 1.450005  | 1.407318  |
| 25            | 1             | 0           | -5.133822               | 2.166402  | -0.214928 |
| 26            | 6             | 0           | -5.271324               | -1.218968 | 0.645647  |
| 27            | 1             | 0           | -6.364480               | -1.299163 | 0.645861  |
| 28            | 1             | 0           | -4.857825               | -2.151309 | 0.247718  |
| 29            | 1             | 0           | -4.934329               | -1.109116 | 1.681468  |
| 30            | 6             | 0           | -5.330931               | -0.194063 | -1.668161 |
| 31            | 1             | 0           | -5.034727               | 0.652301  | -2.296284 |
| 32            | 1             | 0           | -4.921280               | -1.108628 | -2.108955 |
| 33            | 1             | 0           | -6.424787               | -0.265525 | -1.679741 |
| 34            | 6             | 0           | -0.124068               | -3.114785 | 0.305796  |
| 35            | 6             | 0           | 0.623946                | -4.445685 | 0.511659  |
| 36            | 1             | 0           | -0.101397               | -5.250198 | 0.675409  |
| 37            | 1             | 0           | 1.225770                | -4.717699 | -0.362756 |
| 38            | 1             | 0           | 1.284152                | -4.413750 | 1.385742  |
| 39            | 6             | 0           | -0.980288               | -2.838751 | 1.564577  |
| 40            | 1             | 0           | -0.347199               | -2.738900 | 2.453831  |

|    |   |   |           |           |           |
|----|---|---|-----------|-----------|-----------|
| 41 | 1 | 0 | -1.571086 | -1.923621 | 1.461013  |
| 42 | 1 | 0 | -1.675680 | -3.669210 | 1.737058  |
| 43 | 6 | 0 | -1.046604 | -3.261071 | -0.927948 |
| 44 | 1 | 0 | -0.461242 | -3.458456 | -1.833253 |
| 45 | 1 | 0 | -1.738257 | -4.100121 | -0.783313 |
| 46 | 1 | 0 | -1.643432 | -2.359831 | -1.097498 |
| 47 | 6 | 0 | 4.567356  | -1.008797 | -0.241764 |
| 48 | 6 | 0 | 3.846048  | 1.187779  | -0.555629 |
| 49 | 1 | 0 | 3.877539  | 1.685970  | -1.531238 |
| 50 | 1 | 0 | 3.948225  | 1.950768  | 0.224662  |
| 51 | 8 | 0 | 4.970583  | 0.290602  | -0.467864 |
| 52 | 8 | 0 | 5.350343  | -1.919435 | -0.132185 |

**S18** $\langle S^2 \rangle = 1.0377$ 

Zero-point correction= 0.420623 (Hartree/Particle)

Thermal correction to Gibbs Free Energy= 0.360407

Sum of electronic and thermal Free Energies= -1229.349358

E[SMD(chloroform)/B3LYP-D3BJ/6-311+G(d,p)] = -1230.181210

E<sup>1</sup>[SMD(chloroform)/B3LYP-D3BJ/6-311+G(d,p)] = -1230.181302

| Center<br>Number | Atomic<br>Number | Atomic<br>Type | Coordinates (Angstroms) |           |           |
|------------------|------------------|----------------|-------------------------|-----------|-----------|
|                  |                  |                | X                       | Y         | Z         |
| 1                | 6                | 0              | 0.462327                | -0.591819 | -0.068532 |
| 2                | 6                | 0              | 1.302256                | 0.549303  | -0.143521 |
| 3                | 6                | 0              | 2.670734                | 0.434438  | -0.123466 |
| 4                | 6                | 0              | 3.163376                | -0.874044 | -0.035414 |
| 5                | 6                | 0              | 2.352176                | -2.014735 | 0.032752  |
| 6                | 6                | 0              | 0.952690                | -1.923707 | 0.019477  |
| 7                | 1                | 0              | 2.848903                | -2.976124 | 0.098612  |
| 8                | 6                | 0              | -0.732421               | 0.225444  | -0.119581 |
| 9                | 6                | 0              | 0.112239                | 1.516438  | -0.213144 |
| 10               | 6                | 0              | 0.024860                | 2.595259  | 0.868258  |
| 11               | 6                | 0              | -0.276265               | 2.473399  | 2.138761  |
| 12               | 6                | 0              | 0.364111                | 3.904561  | 0.203139  |
| 13               | 8                | 0              | 0.588866                | 4.974771  | 0.700680  |
| 14               | 8                | 0              | 0.410912                | 3.695995  | -1.149686 |
| 15               | 6                | 0              | -0.047799               | 2.375046  | -1.484552 |
| 16               | 1                | 0              | 0.546897                | 2.011791  | -2.325129 |
| 17               | 1                | 0              | -1.101899               | 2.431120  | -1.780162 |
| 18               | 1                | 0              | -0.559519               | 1.689555  | 2.827858  |
| 19               | 6                | 0              | -2.101132               | 0.060306  | -0.103057 |
| 20               | 6                | 0              | -3.324838               | -0.031186 | -0.091905 |
| 21               | 6                | 0              | -4.790256               | -0.154831 | -0.075487 |
| 22               | 6                | 0              | -5.422060               | 1.257669  | -0.090994 |
| 23               | 1                | 0              | -6.514888               | 1.174696  | -0.077380 |
| 24               | 1                | 0              | -5.110034               | 1.838661  | 0.782897  |
| 25               | 1                | 0              | -5.130600               | 1.809725  | -0.990491 |
| 26               | 6                | 0              | -5.224676               | -0.908037 | 1.206224  |
| 27               | 1                | 0              | -6.316095               | -1.008651 | 1.224514  |
| 28               | 1                | 0              | -4.785773               | -1.910422 | 1.241014  |
| 29               | 1                | 0              | -4.914148               | -0.365996 | 2.105265  |
| 30               | 6                | 0              | -5.250195               | -0.947638 | -1.324153 |
| 31               | 1                | 0              | -4.957059               | -0.434892 | -2.245945 |
| 32               | 1                | 0              | -4.812421               | -1.951071 | -1.335855 |
| 33               | 1                | 0              | -6.341833               | -1.047577 | -1.317765 |
| 34               | 6                | 0              | 0.032855                | -3.147303 | 0.096097  |
| 35               | 6                | 0              | 0.827570                | -4.464238 | 0.177612  |
| 36               | 1                | 0              | 0.130459                | -5.307775 | 0.228346  |



|    |   |   |           |           |           |
|----|---|---|-----------|-----------|-----------|
| 37 | 1 | 0 | 1.463331  | -4.614528 | -0.702174 |
| 38 | 1 | 0 | 1.461592  | -4.506361 | 1.070396  |
| 39 | 6 | 0 | -0.857427 | -3.038212 | 1.357563  |
| 40 | 1 | 0 | -0.245787 | -3.010507 | 2.266606  |
| 41 | 1 | 0 | -1.483190 | -2.141186 | 1.338456  |
| 42 | 1 | 0 | -1.521083 | -3.908859 | 1.423592  |
| 43 | 6 | 0 | -0.859717 | -3.195729 | -1.167426 |
| 44 | 1 | 0 | -0.249950 | -3.285333 | -2.073703 |
| 45 | 1 | 0 | -1.526513 | -4.065348 | -1.121821 |
| 46 | 1 | 0 | -1.482555 | -2.301422 | -1.261397 |
| 47 | 6 | 0 | 4.640733  | -0.812230 | -0.026584 |
| 48 | 6 | 0 | 3.846397  | 1.373862  | -0.167138 |
| 49 | 1 | 0 | 3.898784  | 1.963251  | -1.089617 |
| 50 | 1 | 0 | 3.878928  | 2.063534  | 0.684043  |
| 51 | 8 | 0 | 5.002181  | 0.516816  | -0.106650 |
| 52 | 8 | 0 | 5.451945  | -1.702377 | 0.035690  |

### TS4

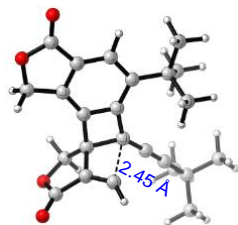

Imaginary frequency= -393.81 cm<sup>-1</sup>

<S<sup>2</sup>>= 0.5324

Zero-point correction= 0.420596 (Hartree/Particle)

Thermal correction to Gibbs Free Energy= 0.363541

Sum of electronic and thermal Free Energies= -1229.336660

E[SMD(chloroform)/B3LYP-D3BJ/6-311+G(d,p)]= -1230.172887

E<sup>1</sup>[SMD(chloroform)/B3LYP-D3BJ/6-311+G(d,p)]= -1230.179901

| Center Number | Atomic Number | Atomic Type | Coordinates (Angstroms) |           |           |
|---------------|---------------|-------------|-------------------------|-----------|-----------|
|               |               |             | X                       | Y         | Z         |
| 1             | 6             | 0           | 0.498478                | -0.521455 | 0.056696  |
| 2             | 6             | 0           | 1.300129                | 0.610385  | -0.230105 |
| 3             | 6             | 0           | 2.665681                | 0.490428  | -0.391705 |
| 4             | 6             | 0           | 3.175402                | -0.801905 | -0.265503 |
| 5             | 6             | 0           | 2.396182                | -1.932250 | 0.025089  |
| 6             | 6             | 0           | 1.011069                | -1.838586 | 0.207762  |
| 7             | 1             | 0           | 2.908897                | -2.883962 | 0.105931  |
| 8             | 6             | 0           | -0.717561               | 0.280289  | 0.097025  |
| 9             | 6             | 0           | 0.129919                | 1.576201  | -0.164891 |
| 10            | 6             | 0           | -0.032408               | 2.383865  | 1.091497  |
| 11            | 6             | 0           | -0.609481               | 1.725902  | 2.077052  |
| 12            | 6             | 0           | 0.226088                | 3.817036  | 0.765450  |
| 13            | 8             | 0           | 0.392598                | 4.773871  | 1.474222  |
| 14            | 8             | 0           | 0.239010                | 3.903858  | -0.611195 |
| 15            | 6             | 0           | -0.120781               | 2.644310  | -1.236020 |
| 16            | 1             | 0           | 0.491206                | 2.538676  | -2.134028 |
| 17            | 1             | 0           | -1.179030               | 2.681105  | -1.519074 |
| 18            | 1             | 0           | -1.021672               | 1.959823  | 3.052478  |
| 19            | 6             | 0           | -2.075698               | 0.055953  | -0.097552 |
| 20            | 6             | 0           | -3.274366               | -0.096146 | -0.284120 |
| 21            | 6             | 0           | -4.717758               | -0.276578 | -0.502679 |
| 22            | 6             | 0           | -5.497124               | 0.704040  | 0.407509  |

|    |   |   |           |           |           |
|----|---|---|-----------|-----------|-----------|
| 23 | 1 | 0 | -6.574609 | 0.580658  | 0.247461  |
| 24 | 1 | 0 | -5.281923 | 0.514936  | 1.464112  |
| 25 | 1 | 0 | -5.232711 | 1.742845  | 0.184968  |
| 26 | 6 | 0 | -5.110169 | -1.733230 | -0.159041 |
| 27 | 1 | 0 | -6.185313 | -1.874543 | -0.318566 |
| 28 | 1 | 0 | -4.571642 | -2.445924 | -0.792071 |
| 29 | 1 | 0 | -4.884165 | -1.964820 | 0.886813  |
| 30 | 6 | 0 | -5.049085 | 0.016817  | -1.987003 |
| 31 | 1 | 0 | -4.778395 | 1.043203  | -2.255428 |
| 32 | 1 | 0 | -4.510982 | -0.665509 | -2.652971 |
| 33 | 1 | 0 | -6.124296 | -0.111082 | -2.157646 |
| 34 | 6 | 0 | 0.125652  | -3.048623 | 0.526451  |
| 35 | 6 | 0 | 0.954852  | -4.326707 | 0.755861  |
| 36 | 1 | 0 | 0.282927  | -5.156383 | 1.001343  |
| 37 | 1 | 0 | 1.520379  | -4.616521 | -0.136794 |
| 38 | 1 | 0 | 1.659494  | -4.213369 | 1.587463  |
| 39 | 6 | 0 | -0.692232 | -2.765866 | 1.808680  |
| 40 | 1 | 0 | -0.030034 | -2.603893 | 2.666779  |
| 41 | 1 | 0 | -1.331097 | -1.884819 | 1.703026  |
| 42 | 1 | 0 | -1.336829 | -3.623260 | 2.035889  |
| 43 | 6 | 0 | -0.833812 | -3.298987 | -0.662478 |
| 44 | 1 | 0 | -0.272500 | -3.517880 | -1.578100 |
| 45 | 1 | 0 | -1.478531 | -4.159781 | -0.447095 |
| 46 | 1 | 0 | -1.477526 | -2.435647 | -0.854019 |
| 47 | 6 | 0 | 4.639550  | -0.745336 | -0.479353 |
| 48 | 6 | 0 | 3.811833  | 1.420947  | -0.684685 |
| 49 | 1 | 0 | 3.724015  | 1.930552  | -1.651170 |
| 50 | 1 | 0 | 3.961223  | 2.179644  | 0.092152  |
| 51 | 8 | 0 | 4.972733  | 0.570429  | -0.723109 |
| 52 | 8 | 0 | 5.457778  | -1.630291 | -0.461802 |

**11**

Zero-point correction= 0.424415 (Hartree/Particle)

Thermal correction to Gibbs Free Energy= 0.366904

Sum of electronic and thermal Free Energies= -1229.389147

E[SMD(chloroform)/B3LYP-D3BJ/6-311+G(d,p)]= -1230.229237

| Center<br>Number | Atomic<br>Number | Atomic<br>Type | Coordinates (Angstroms) |           |           |
|------------------|------------------|----------------|-------------------------|-----------|-----------|
|                  |                  |                | X                       | Y         | Z         |
| 1                | 6                | 0              | 0.512929                | -0.406324 | 0.300365  |
| 2                | 6                | 0              | 1.212227                | 0.677595  | -0.246707 |
| 3                | 6                | 0              | 2.520394                | 0.527246  | -0.674065 |
| 4                | 6                | 0              | 3.062549                | -0.748635 | -0.524413 |
| 5                | 6                | 0              | 2.376242                | -1.828589 | 0.034717  |
| 6                | 6                | 0              | 1.049349                | -1.691647 | 0.488435  |
| 7                | 1                | 0              | 2.901117                | -2.774410 | 0.109231  |
| 8                | 6                | 0              | -0.755053               | 0.439247  | 0.560689  |
| 9                | 6                | 0              | 0.093881                | 1.674462  | -0.038711 |
| 10               | 6                | 0              | -0.068616               | 2.275282  | 1.342224  |
| 11               | 6                | 0              | -0.760039               | 1.262118  | 1.882414  |
| 12               | 6                | 0              | 0.092808                | 3.743473  | 1.277035  |
| 13               | 8                | 0              | 0.243933                | 4.584250  | 2.123239  |
| 14               | 8                | 0              | 0.010009                | 4.043054  | -0.069898 |
| 15               | 6                | 0              | -0.292851               | 2.872004  | -0.893984 |
| 16               | 1                | 0              | 0.282562                | 2.978825  | -1.815710 |
| 17               | 1                | 0              | -1.363110               | 2.878733  | -1.128290 |
| 18               | 1                | 0              | -1.250340               | 1.087512  | 2.833743  |
| 19               | 6                | 0              | -2.042718               | 0.091500  | 0.011844  |
| 20               | 6                | 0              | -3.138828               | -0.160409 | -0.442940 |

|    |   |   |           |           |           |
|----|---|---|-----------|-----------|-----------|
| 21 | 6 | 0 | -4.468329 | -0.469871 | -1.000127 |
| 22 | 6 | 0 | -5.118292 | -1.603942 | -0.172417 |
| 23 | 1 | 0 | -6.108223 | -1.842071 | -0.578878 |
| 24 | 1 | 0 | -4.507264 | -2.512053 | -0.201772 |
| 25 | 1 | 0 | -5.238858 | -1.306754 | 0.874505  |
| 26 | 6 | 0 | -4.314617 | -0.920409 | -2.471929 |
| 27 | 1 | 0 | -5.298599 | -1.151282 | -2.896459 |
| 28 | 1 | 0 | -3.855093 | -0.132726 | -3.078098 |
| 29 | 1 | 0 | -3.689304 | -1.816168 | -2.546125 |
| 30 | 6 | 0 | -5.354775 | 0.796426  | -0.932519 |
| 31 | 1 | 0 | -5.476071 | 1.137221  | 0.100888  |
| 32 | 1 | 0 | -4.916440 | 1.615094  | -1.512938 |
| 33 | 1 | 0 | -6.347909 | 0.578415  | -1.342341 |
| 34 | 6 | 0 | 0.257079  | -2.868707 | 1.077306  |
| 35 | 6 | 0 | 1.185065  | -4.015953 | 1.524981  |
| 36 | 1 | 0 | 0.587729  | -4.804498 | 1.995618  |
| 37 | 1 | 0 | 1.716054  | -4.472547 | 0.683032  |
| 38 | 1 | 0 | 1.928235  | -3.676068 | 2.255334  |
| 39 | 6 | 0 | -0.560092 | -2.405186 | 2.304183  |
| 40 | 1 | 0 | 0.088920  | -1.971570 | 3.073889  |
| 41 | 1 | 0 | -1.319865 | -1.666187 | 2.033377  |
| 42 | 1 | 0 | -1.082875 | -3.260414 | 2.748011  |
| 43 | 6 | 0 | -0.707895 | -3.408129 | -0.006924 |
| 44 | 1 | 0 | -0.152639 | -3.761692 | -0.883116 |
| 45 | 1 | 0 | -1.287552 | -4.250906 | 0.389650  |
| 46 | 1 | 0 | -1.409258 | -2.634895 | -0.335614 |
| 47 | 6 | 0 | 4.451954  | -0.725863 | -1.040344 |
| 48 | 6 | 0 | 3.568129  | 1.412191  | -1.293779 |
| 49 | 1 | 0 | 3.274909  | 1.817221  | -2.269470 |
| 50 | 1 | 0 | 3.865692  | 2.248045  | -0.649745 |
| 51 | 8 | 0 | 4.708231  | 0.554568  | -1.483841 |
| 52 | 8 | 0 | 5.269724  | -1.608634 | -1.100842 |

### TS5

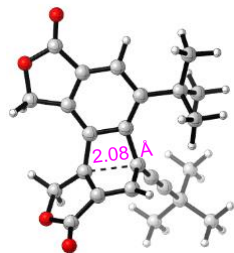

Imaginary frequency= -728.26 cm<sup>-1</sup>

<S<sup>2</sup>>= 0.0000

Zero-point correction= 0.421313 (Hartree/Particle)

Thermal correction to Gibbs Free Energy= 0.363305

Sum of electronic and thermal Free Energies= -1229.372004

E[SMD(chloroform)/B3LYP-D3BJ/6-311+G(d,p)]= -1230.210948

E<sup>1</sup>[SMD(chloroform)/B3LYP-D3BJ/6-311+G(d,p)]= -1230.210948

| Center Number | Atomic Number | Atomic Type | Coordinates (Angstroms) |           |           |
|---------------|---------------|-------------|-------------------------|-----------|-----------|
|               |               |             | X                       | Y         | Z         |
| 1             | 6             | 0           | 0.531054                | -0.405123 | 0.453683  |
| 2             | 6             | 0           | 1.019103                | 0.769499  | -0.156840 |
| 3             | 6             | 0           | 2.268622                | 0.727994  | -0.773812 |
| 4             | 6             | 0           | 2.997347                | -0.451437 | -0.657327 |
| 5             | 6             | 0           | 2.548718                | -1.577625 | 0.032197  |

|    |   |   |           |           |           |
|----|---|---|-----------|-----------|-----------|
| 6  | 6 | 0 | 1.274224  | -1.583975 | 0.629481  |
| 7  | 1 | 0 | 3.195300  | -2.446249 | 0.068818  |
| 8  | 6 | 0 | -0.845800 | 0.092070  | 0.812611  |
| 9  | 6 | 0 | 0.020572  | 1.835353  | 0.068037  |
| 10 | 6 | 0 | -0.493452 | 2.132884  | 1.403431  |
| 11 | 6 | 0 | -0.904527 | 0.997175  | 2.012623  |
| 12 | 6 | 0 | -0.593668 | 3.604315  | 1.561358  |
| 13 | 8 | 0 | -0.832064 | 4.284075  | 2.525543  |
| 14 | 8 | 0 | -0.388128 | 4.139298  | 0.306211  |
| 15 | 6 | 0 | -0.159291 | 3.117460  | -0.700488 |
| 16 | 1 | 0 | 0.725780  | 3.410500  | -1.276605 |
| 17 | 1 | 0 | -1.023531 | 3.111564  | -1.378025 |
| 18 | 1 | 0 | -1.050193 | 0.736348  | 3.053580  |
| 19 | 6 | 0 | -1.986376 | -0.175007 | 0.040047  |
| 20 | 6 | 0 | -2.997273 | -0.481118 | -0.570500 |
| 21 | 6 | 0 | -4.220869 | -0.823319 | -1.311412 |
| 22 | 6 | 0 | -5.338831 | -1.200531 | -0.309210 |
| 23 | 1 | 0 | -6.258133 | -1.447389 | -0.853035 |
| 24 | 1 | 0 | -5.051231 | -2.069393 | 0.291777  |
| 25 | 1 | 0 | -5.553413 | -0.370024 | 0.371042  |
| 26 | 6 | 0 | -3.936085 | -2.015808 | -2.254473 |
| 27 | 1 | 0 | -4.843191 | -2.271822 | -2.814064 |
| 28 | 1 | 0 | -3.146452 | -1.769800 | -2.971789 |
| 29 | 1 | 0 | -3.621075 | -2.898887 | -1.688910 |
| 30 | 6 | 0 | -4.663994 | 0.406060  | -2.144182 |
| 31 | 1 | 0 | -4.868312 | 1.265845  | -1.498088 |
| 32 | 1 | 0 | -3.890370 | 0.692377  | -2.864057 |
| 33 | 1 | 0 | -5.578737 | 0.165963  | -2.698656 |
| 34 | 6 | 0 | 0.707594  | -2.828697 | 1.333324  |
| 35 | 6 | 0 | 1.820487  | -3.828811 | 1.707382  |
| 36 | 1 | 0 | 1.387231  | -4.663998 | 2.268676  |
| 37 | 1 | 0 | 2.310953  | -4.253277 | 0.825135  |
| 38 | 1 | 0 | 2.588983  | -3.364797 | 2.336025  |
| 39 | 6 | 0 | -0.025827 | -2.427047 | 2.631753  |
| 40 | 1 | 0 | 0.638870  | -1.886665 | 3.315200  |
| 41 | 1 | 0 | -0.900204 | -1.798685 | 2.430937  |
| 42 | 1 | 0 | -0.387878 | -3.322671 | 3.149411  |
| 43 | 6 | 0 | -0.288754 | -3.533362 | 0.380032  |
| 44 | 1 | 0 | 0.209722  | -3.844567 | -0.544804 |
| 45 | 1 | 0 | -0.701406 | -4.428884 | 0.860787  |
| 46 | 1 | 0 | -1.122409 | -2.876739 | 0.111153  |
| 47 | 6 | 0 | 4.288111  | -0.275584 | -1.363498 |
| 48 | 6 | 0 | 3.091250  | 1.706186  | -1.570821 |
| 49 | 1 | 0 | 2.615994  | 2.012852  | -2.510555 |
| 50 | 1 | 0 | 3.356335  | 2.609504  | -1.007834 |
| 51 | 8 | 0 | 4.302342  | 0.999028  | -1.889767 |
| 52 | 8 | 0 | 5.204520  | -1.044954 | -1.504049 |

**8**

Zero-point correction= 0.426969 (Hartree/Particle)

Thermal correction to Gibbs Free Energy= 0.369270

Sum of electronic and thermal Free Energies= -1229.503122

E[SMD(chloroform)/B3LYP-D3BJ/6-311+G(d,p)]= -1230.348900

| Center<br>Number | Atomic<br>Number | Atomic<br>Type | Coordinates (Angstroms) |           |           |
|------------------|------------------|----------------|-------------------------|-----------|-----------|
|                  |                  |                | X                       | Y         | Z         |
| 1                | 6                | 0              | -2.860826               | -0.220260 | 0.083210  |
| 2                | 6                | 0              | -1.659616               | 0.525144  | -0.003041 |
| 3                | 6                | 0              | -0.371239               | -0.177737 | -0.048162 |

|    |   |   |           |           |           |
|----|---|---|-----------|-----------|-----------|
| 4  | 6 | 0 | -0.390910 | -1.647193 | -0.085040 |
| 5  | 6 | 0 | -1.617019 | -2.286412 | 0.015758  |
| 6  | 6 | 0 | -1.703315 | 1.939526  | -0.041062 |
| 7  | 6 | 0 | 0.815959  | 0.681542  | -0.049511 |
| 8  | 1 | 0 | -1.686975 | -3.364116 | 0.008668  |
| 9  | 6 | 0 | 0.695693  | 2.072846  | -0.087687 |
| 10 | 6 | 0 | -0.555323 | 2.682520  | -0.097033 |
| 11 | 1 | 0 | 1.591735  | 2.682807  | -0.095415 |
| 12 | 6 | 0 | -4.311649 | 0.195787  | 0.169799  |
| 13 | 1 | 0 | -4.544120 | 0.786026  | 1.063946  |
| 14 | 1 | 0 | -4.663003 | 0.748032  | -0.709712 |
| 15 | 8 | 0 | -5.048098 | -1.033297 | 0.245989  |
| 16 | 6 | 0 | -2.821534 | -1.582347 | 0.111021  |
| 17 | 6 | 0 | -4.196690 | -2.117565 | 0.212037  |
| 18 | 8 | 0 | -4.586072 | -3.255889 | 0.259963  |
| 19 | 6 | 0 | -0.893426 | 4.122574  | -0.130600 |
| 20 | 6 | 0 | -2.864931 | 2.907555  | -0.035867 |
| 21 | 1 | 0 | -3.527570 | 2.797726  | -0.902330 |
| 22 | 1 | 0 | -3.474039 | 2.855273  | 0.874132  |
| 23 | 8 | 0 | -2.268368 | 4.211248  | -0.095664 |
| 24 | 8 | 0 | -0.176593 | 5.088190  | -0.178455 |
| 25 | 6 | 0 | 2.197116  | 0.298532  | 0.024076  |
| 26 | 6 | 0 | 3.409349  | 0.251128  | 0.097728  |
| 27 | 6 | 0 | 0.841529  | -2.580750 | -0.255898 |
| 28 | 6 | 0 | 0.441773  | -4.069032 | -0.440263 |
| 29 | 1 | 0 | -0.048233 | -4.492765 | 0.442308  |
| 30 | 1 | 0 | -0.204936 | -4.225919 | -1.310028 |
| 31 | 1 | 0 | 1.356944  | -4.648062 | -0.605280 |
| 32 | 6 | 0 | 1.604283  | -2.234465 | -1.562161 |
| 33 | 1 | 0 | 2.524481  | -2.827576 | -1.621293 |
| 34 | 1 | 0 | 0.981677  | -2.498609 | -2.425256 |
| 35 | 1 | 0 | 1.883351  | -1.188703 | -1.659600 |
| 36 | 6 | 0 | 1.707811  | -2.566038 | 1.031538  |
| 37 | 1 | 0 | 1.160204  | -3.061506 | 1.841802  |
| 38 | 1 | 0 | 2.635918  | -3.126671 | 0.863942  |
| 39 | 1 | 0 | 1.977817  | -1.569579 | 1.371864  |
| 40 | 6 | 0 | 4.875965  | 0.145943  | 0.196652  |
| 41 | 6 | 0 | 5.380178  | -1.007684 | -0.702083 |
| 42 | 1 | 0 | 4.950598  | -1.965556 | -0.391347 |
| 43 | 1 | 0 | 5.112380  | -0.836641 | -1.749850 |
| 44 | 1 | 0 | 6.471775  | -1.082313 | -0.634050 |
| 45 | 6 | 0 | 5.268826  | -0.130367 | 1.668341  |
| 46 | 1 | 0 | 6.359683  | -0.197089 | 1.755750  |
| 47 | 1 | 0 | 4.919731  | 0.672723  | 2.325545  |
| 48 | 1 | 0 | 4.837348  | -1.072713 | 2.021280  |
| 49 | 6 | 0 | 5.508619  | 1.479931  | -0.267237 |
| 50 | 1 | 0 | 6.601055  | 1.418931  | -0.198395 |
| 51 | 1 | 0 | 5.242052  | 1.701587  | -1.305912 |
| 52 | 1 | 0 | 5.171442  | 2.313620  | 0.357479  |

---

## Comparison of benzyne **30-benz** and the isomeric cyclobutadiene **32**

The zero-point correction, thermal correction to Gibbs free energy, the sum of the electronic and thermal free energies, the Cartesian coordinates at B3LYP/6-31G(d), and electronic energy at SMD(chloroform)/B3LYP-D3BJ/6-311+G(d,p) for each of **30-benz** and **32** is given on pages S66 and S67, respectively.

### **30-benz**

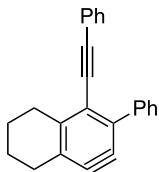

Zero-point correction= 0.341211 (Hartree/Particle)

Thermal correction to Gibbs Free Energy= 0.290975

Sum of electronic and thermal Free Energies= -924.947785

E[SMD(chloroform)/B3LYP-D3BJ/6-311+G(d,p)]= -925.5899531

| Center Number | Atomic Number | Atomic Type | Coordinates (Angstroms) |           |           |
|---------------|---------------|-------------|-------------------------|-----------|-----------|
|               |               |             | X                       | Y         | Z         |
| 1             | 6             | 0           | 3.596920                | -0.311910 | -0.025593 |
| 2             | 6             | 0           | 3.598329                | 1.076209  | -0.049038 |
| 3             | 6             | 0           | 2.631828                | 1.862153  | -0.047866 |
| 4             | 6             | 0           | 1.279960                | 1.550301  | 0.029376  |
| 5             | 6             | 0           | 1.133927                | 0.114334  | 0.025089  |
| 6             | 6             | 0           | 2.258255                | -0.783002 | -0.002162 |
| 7             | 6             | 0           | 2.002347                | -2.284141 | 0.017784  |
| 8             | 1             | 0           | 1.661906                | -2.570183 | 1.024499  |
| 9             | 1             | 0           | 1.165620                | -2.516429 | -0.650077 |
| 10            | 6             | 0           | 3.227403                | -3.125712 | -0.364674 |
| 11            | 1             | 0           | 3.022796                | -4.181332 | -0.149668 |
| 12            | 1             | 0           | 3.401337                | -3.052862 | -1.447590 |
| 13            | 6             | 0           | 4.479059                | -2.650945 | 0.378467  |
| 14            | 1             | 0           | 5.333941                | -3.303620 | 0.166013  |
| 15            | 1             | 0           | 4.301750                | -2.701547 | 1.461823  |
| 16            | 6             | 0           | 4.811598                | -1.209463 | -0.025138 |
| 17            | 1             | 0           | 5.573293                | -0.782108 | 0.638343  |
| 18            | 1             | 0           | 5.254459                | -1.204326 | -1.032679 |
| 19            | 6             | 0           | 0.203565                | 2.561947  | 0.071897  |
| 20            | 6             | 0           | 0.408339                | 3.782107  | -0.597719 |
| 21            | 6             | 0           | -0.990683               | 2.391024  | 0.792707  |
| 22            | 6             | 0           | -0.555776               | 4.785965  | -0.573095 |
| 23            | 1             | 0           | 1.335321                | 3.928994  | -1.145898 |
| 24            | 6             | 0           | -1.952624               | 3.400610  | 0.822094  |
| 25            | 1             | 0           | -1.157510               | 1.476453  | 1.348759  |
| 26            | 6             | 0           | -1.744933               | 4.597778  | 0.135015  |
| 27            | 1             | 0           | -0.378375               | 5.716305  | -1.106182 |
| 28            | 1             | 0           | -2.864045               | 3.253118  | 1.395781  |
| 29            | 1             | 0           | -2.498293               | 5.380656  | 0.158282  |
| 30            | 6             | 0           | -0.169565               | -0.460515 | 0.006880  |
| 31            | 6             | 0           | -1.270761               | -0.979181 | -0.029392 |
| 32            | 6             | 0           | -2.585566               | -1.526473 | -0.065376 |
| 33            | 6             | 0           | -2.803527               | -2.903444 | 0.141731  |
| 34            | 6             | 0           | -3.695233               | -0.690189 | -0.306628 |
| 35            | 6             | 0           | -4.093986               | -3.424503 | 0.109767  |
| 36            | 1             | 0           | -1.952745               | -3.551682 | 0.328492  |
| 37            | 6             | 0           | -4.981861               | -1.220756 | -0.335451 |
| 38            | 1             | 0           | -3.529995               | 0.370435  | -0.469857 |
| 39            | 6             | 0           | -5.187049               | -2.587296 | -0.128054 |
| 40            | 1             | 0           | -4.247936               | -4.488048 | 0.271414  |
| 41            | 1             | 0           | -5.828488               | -0.565592 | -0.522534 |
| 42            | 1             | 0           | -6.192841               | -2.997606 | -0.152647 |

32

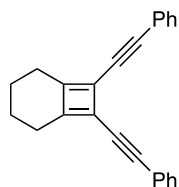

Zero-point correction= 0.338524 (Hartree/Particle)  
 Thermal correction to Gibbs Free Energy= 0.285058  
 Sum of electronic and thermal Free Energies= -924.904752  
 E[SMD(chloroform)/B3LYP-D3BJ/6-311+G(d,p)]= -925.5353682

| Center Number | Atomic Number | Atomic Type | Coordinates (Angstroms) |           |           |
|---------------|---------------|-------------|-------------------------|-----------|-----------|
|               |               |             | X                       | Y         | Z         |
| 1             | 6             | 0           | 0.751822                | 2.864114  | -0.002795 |
| 2             | 6             | 0           | 0.815601                | 1.503636  | -0.011786 |
| 3             | 6             | 0           | -0.749411               | 2.865270  | -0.010016 |
| 4             | 6             | 0           | -0.815320               | 1.504862  | -0.008575 |
| 5             | 6             | 0           | 1.578907                | 4.099599  | 0.059715  |
| 6             | 1             | 0           | 1.940403                | 4.247732  | 1.090312  |
| 7             | 1             | 0           | 2.474775                | 4.034948  | -0.570658 |
| 8             | 6             | 0           | 0.690560                | 5.306745  | -0.339441 |
| 9             | 1             | 0           | 1.219659                | 6.238138  | -0.107074 |
| 10            | 1             | 0           | 0.534295                | 5.297722  | -1.427351 |
| 11            | 6             | 0           | -1.779520               | 0.514495  | -0.011854 |
| 12            | 6             | 0           | -2.596823               | -0.397679 | -0.010340 |
| 13            | 6             | 0           | -0.683764               | 5.300551  | 0.367401  |
| 14            | 1             | 0           | -0.528119               | 5.268209  | 1.454959  |
| 15            | 1             | 0           | -1.211192               | 6.237510  | 0.154391  |
| 16            | 6             | 0           | -1.573417               | 4.103303  | -0.057598 |
| 17            | 1             | 0           | -1.926994               | 4.270308  | -1.088124 |
| 18            | 1             | 0           | -2.473627               | 4.030569  | 0.565534  |
| 19            | 6             | 0           | -3.561853               | -1.435328 | -0.007685 |
| 20            | 6             | 0           | -4.942292               | -1.134893 | -0.006147 |
| 21            | 6             | 0           | -3.163968               | -2.790658 | -0.005374 |
| 22            | 6             | 0           | -5.885830               | -2.156848 | -0.001911 |
| 23            | 1             | 0           | -5.255245               | -0.095301 | -0.008071 |
| 24            | 6             | 0           | -4.116697               | -3.804261 | -0.001409 |
| 25            | 1             | 0           | -2.104758               | -3.028641 | -0.006508 |
| 26            | 6             | 0           | -5.479818               | -3.494447 | 0.000517  |
| 27            | 1             | 0           | -6.944182               | -1.909714 | -0.000502 |
| 28            | 1             | 0           | -3.795097               | -4.842405 | 0.000484  |
| 29            | 1             | 0           | -6.220217               | -4.289583 | 0.003965  |
| 30            | 6             | 0           | 1.779083                | 0.512606  | -0.007598 |
| 31            | 6             | 0           | 2.600671                | -0.395660 | -0.010054 |
| 32            | 6             | 0           | 3.562180                | -1.436513 | -0.001054 |
| 33            | 6             | 0           | 4.943614                | -1.140829 | 0.000898  |
| 34            | 6             | 0           | 3.159563                | -2.790451 | 0.005653  |
| 35            | 6             | 0           | 5.883686                | -2.165946 | 0.009426  |
| 36            | 1             | 0           | 5.260128                | -0.102323 | -0.004346 |
| 37            | 6             | 0           | 4.108856                | -3.807236 | 0.014566  |
| 38            | 1             | 0           | 2.099539                | -3.024741 | 0.004014  |
| 39            | 6             | 0           | 5.473052                | -3.502095 | 0.016344  |
| 40            | 1             | 0           | 6.942875                | -1.922433 | 0.010756  |
| 41            | 1             | 0           | 3.783743                | -4.844270 | 0.019942  |
| 42            | 1             | 0           | 6.210709                | -4.299755 | 0.022977  |

**IV. X-ray data for 8 (CCDC deposition number: 1818955)**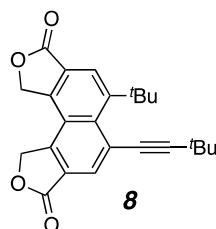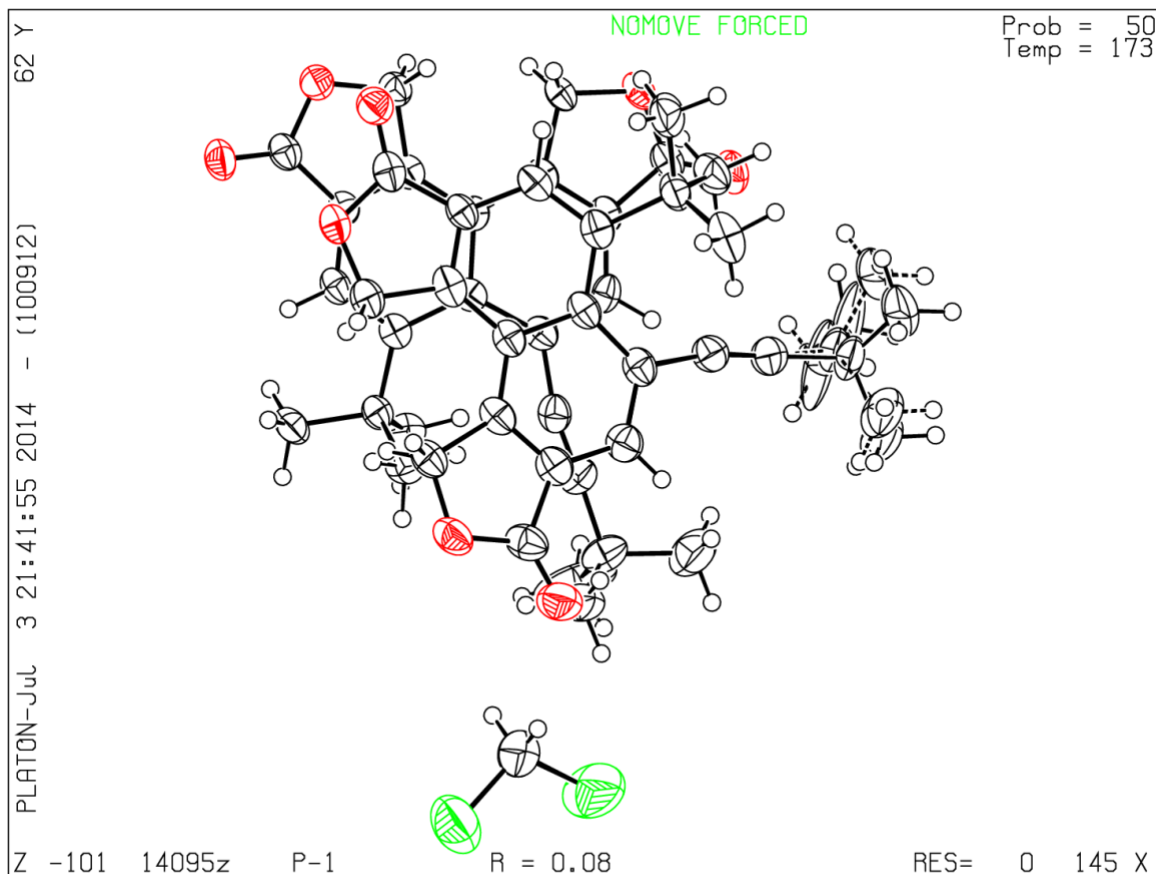**Structure description**

There are two unique molecules in the asymmetric unit, one of which required disorder modeling of the t-butyl group. The t-butyl group was found to be in a 63:37 ratio and was modeled using SAME restraints.

|                   |                                                                |
|-------------------|----------------------------------------------------------------|
| Empirical formula | C <sub>49</sub> H <sub>50</sub> Cl <sub>2</sub> O <sub>8</sub> |
| Formula weight    | 837.79                                                         |
| Temperature       | 173(2) K                                                       |
| Wavelength        | 1.54178 Å                                                      |



|                                        |                                                                                                                                                                              |
|----------------------------------------|------------------------------------------------------------------------------------------------------------------------------------------------------------------------------|
| Crystal system                         | TRICLINIC                                                                                                                                                                    |
| Space group                            | P-1                                                                                                                                                                          |
| Unit cell dimensions                   | $a = 10.1822(3) \text{ \AA}$ $\alpha = 86.262(2)^\circ$<br>$b = 11.4248(4) \text{ \AA}$ $\beta = 88.850(2)^\circ$<br>$c = 20.2749(7) \text{ \AA}$ $\gamma = 65.461(2)^\circ$ |
| Volume                                 | 2140.91(12) $\text{\AA}^3$                                                                                                                                                   |
| Z                                      | 2                                                                                                                                                                            |
| Density (calculated)                   | 1.300 $\text{Mg/m}^3$                                                                                                                                                        |
| Absorption coefficient                 | 1.808 $\text{mm}^{-1}$                                                                                                                                                       |
| $F(000)$                               | 884                                                                                                                                                                          |
| Crystal color, morphology              | COLORLESS, PLATE                                                                                                                                                             |
| Crystal size                           | 0.13 x 0.05 x 0.03 $\text{mm}^3$                                                                                                                                             |
| Theta range for data collection        | 4.26 to 67.04°                                                                                                                                                               |
| Index ranges                           | $-12 \leq h \leq 12, -13 \leq k \leq 10, -24 \leq l \leq 24$                                                                                                                 |
| Reflections collected                  | 24076                                                                                                                                                                        |
| Independent reflections                | 7514 [ $R(\text{int}) = 0.0820$ ]                                                                                                                                            |
| Observed reflections                   | 4050                                                                                                                                                                         |
| Completeness to $\theta = 67.04^\circ$ | 98.4%                                                                                                                                                                        |
| Absorption correction                  | Multi-scan                                                                                                                                                                   |
| Max. and min. transmission             | 0.9478 and 0.8003                                                                                                                                                            |
| Refinement method                      | Full-matrix least-squares on $F^2$                                                                                                                                           |
| Data / restraints / parameters         | 7514 / 18 / 560                                                                                                                                                              |
| Goodness-of-fit on $F^2$               | 1.017                                                                                                                                                                        |
| Final $R$ indices [ $I > 2\sigma(I)$ ] | $R1 = 0.0812, wR2 = 0.1991$                                                                                                                                                  |
| $R$ indices (all data)                 | $R1 = 0.1503, wR2 = 0.2384$                                                                                                                                                  |
| Largest diff. peak and hole            | 0.794 and -0.735 $\text{e.\AA}^{-3}$                                                                                                                                         |

## V. UV and FL spectral data for 16a and 16b

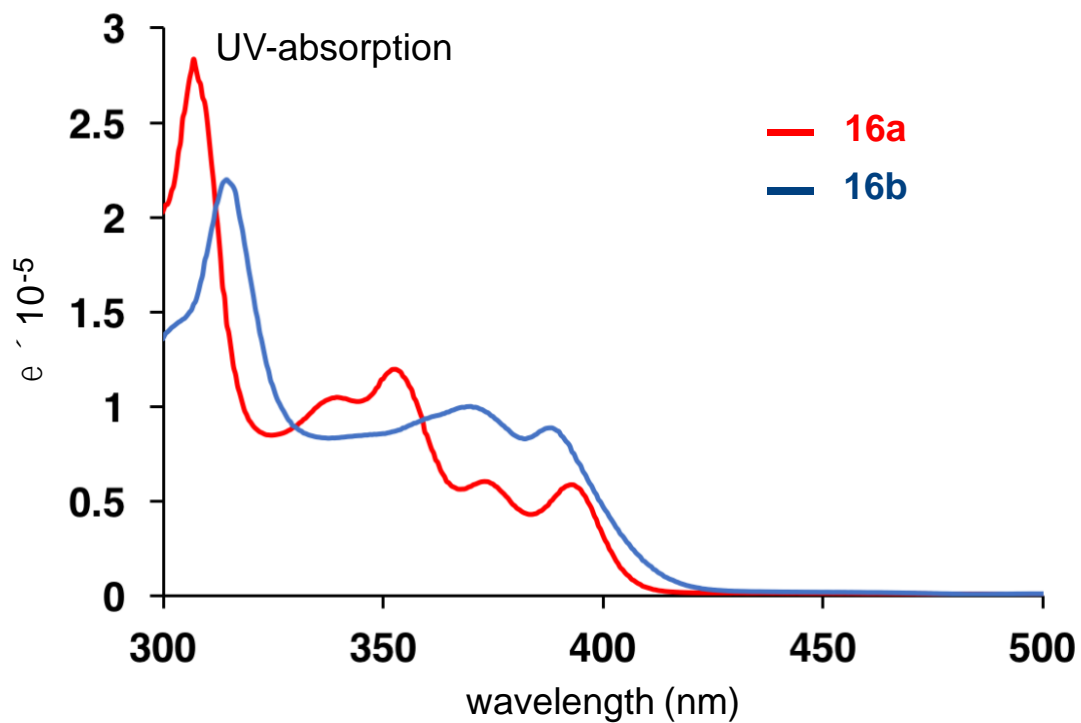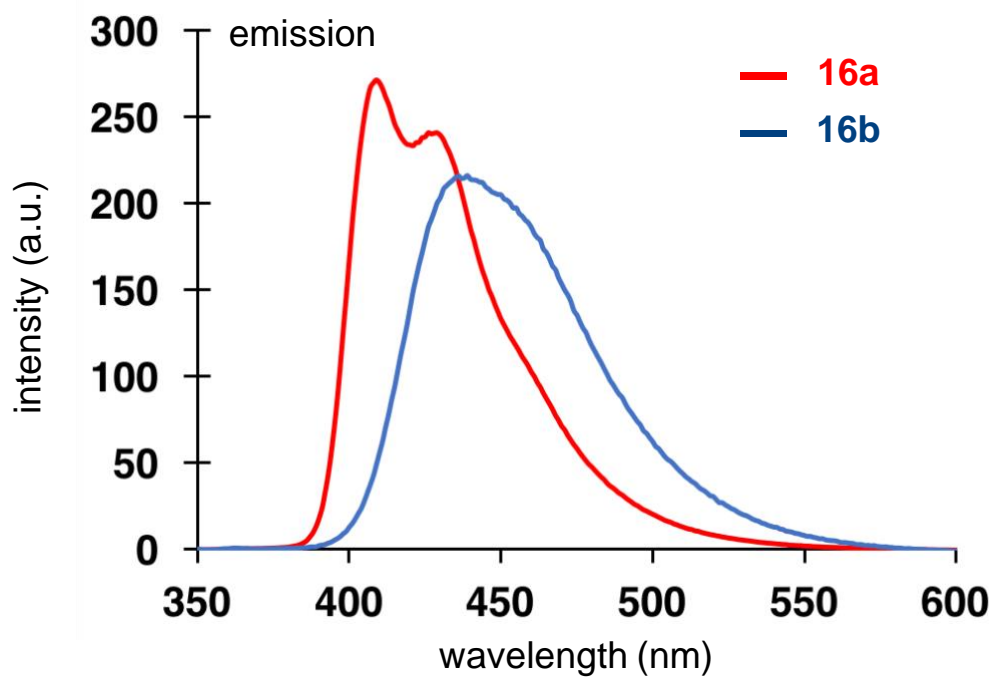

## VI. References for Supporting Information

---

- [1] T.R. Hoye, P. R. Hanson, J. R. Vyvyan, *J. Org. Chem.* **1994**, *59*, 4096.
- [2] T.R. Hoye, H. Zhao, *J. Org. Chem.* **2002**, *67*, 4014.
- [3] P. H. Willoughby, D. W. Niu, T. Wang, M. K. Haj, C. J. Cramer, T. R. Hoye, *J. Am. Chem. Soc.* **2014**, *136*, 13657.
- [4] N. P. Bowling, N. J. Burrmann, R. J. Halter, J. A. Hodges, R. J. McMahon, *J. Org. Chem.* **2010**, *75*, 6382.
- [5] M. S. Shepard, E. M. Carreira, *Tetrahedron* **1997**, *53*, 16253.
- [6] L. H. Andrade, T. Barcellos, *Org. Lett.* **2009**, *11*, 3052.
- [7] B. M. Trost, J. L. Gunzner, O. Dirat, Y. H. Rhee, *J. Am. Chem. Soc.* **2002**, *124*, 10396.
- [8] R. Karmakar, S. Y. Yun, J. J. Chen, Y. Z. Xia, D. Lee, *Angew. Chem. Int. Ed.* **2015**, *54*, 6582.
- [9] W. Y. Yin, C. He, M. Chen, H. Zhang, A. W. Lei, *Org. Lett.* **2009**, *11*, 709.
- [10] J. Cho, Y. M. Lee, D. Kim, S. Kim, *J. Org. Chem.* **2009**, *74*, 3900.
- [11] R. Balamurugan, N. Naveen, S. Manojveer, M. V. Nama, *Aust. J. Chem.* **2011**, *64*, 567.
- [12] P. Wessig, G. Muller, R. Herre, A. Kuhn, *Helv. Chim. Acta.* **2006**, *89*, 2694.
- [13] D. J. Marell, L. R. Furan, B. P. Woods, X. Y. Lei, A. J. Bendel-Smith, C. J. Cramer, T. R. Hoye, K. T. Kuwata, *J. Org. Chem.* **2015**, *80*, 11744.
- [14] F. Xu, X. Xiao, T. R. Hoye, *J. Am. Chem. Soc.* **2017**, *139*, 8400.
- [15] J. H. Chen, V. Palani, T. R. Hoye, *J. Am. Chem. Soc.* **2016**, *138*, 4318.
- [16] X. Xiao, T. R. Hoye, *Nature Chem.* **2018**, accepted, DOI:10.1038/s41557-018-0075-y.
- [17] J. T. Zhang, D. W. Niu, V. A. Brinker, T. R. Hoye, *Org. Lett.* **2016**, *18*, 5596.
- [18] F. Xu, X. Xiao, T. R. Hoye, *Org. Lett.* **2016**, *18*, 5636.
- [19] F. Xu, K. W. Hershey, R. J. Holmes, T. R. Hoye, *J. Am. Chem. Soc.* **2016**, *138*, 12739.
- [20] M. J. Frisch, *et. al.*, Gaussian 09, Revision E.01, Gaussian Inc. Wallingford CT, **2013**.
- [21] P. J. Stephens, F. J. Devlin, C. F. Chabalowski, M. J. Frisch, *J. Phys. Chem.* **1994**, *98*, 11623.
- [22] S. Grimme, J. Antony, S. Ehrlich, H. Krieg, *J. Chem. Phys.* **2010**, *132*, 154104.
- [23] E. R. Johnson, A. D. Becke, *J. Chem. Phys.* **2006**, *124*, 174104.
- [24] A. V. Marenich, C. J. Cramer, D. G. Truhlar, *J. Phys. Chem. B*, **2009**, *113*, 6378.
- [25] K. Yamaguchi, F. Jensen, A. Dorigo, K. N. Houk, *Chem. Phys. Lett.* **1988**, *149*, 537.
- [26] CYLview, 1.0b; C. Y. Legault, Université de Sherbrooke, **2009** (<http://www.cylview.org>)

## VII. Copies of <sup>1</sup>H, and <sup>13</sup>C NMR spectra

—7.26 CDCl<sub>3</sub>

—4.35

—1.75

—1.47

—0.86

—0.17

—0.00

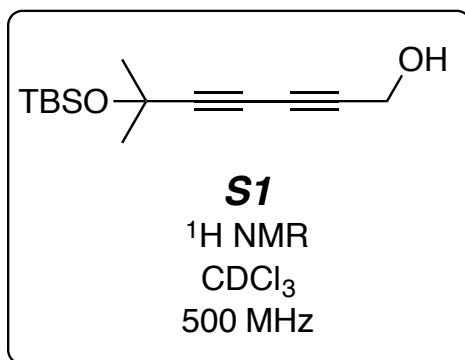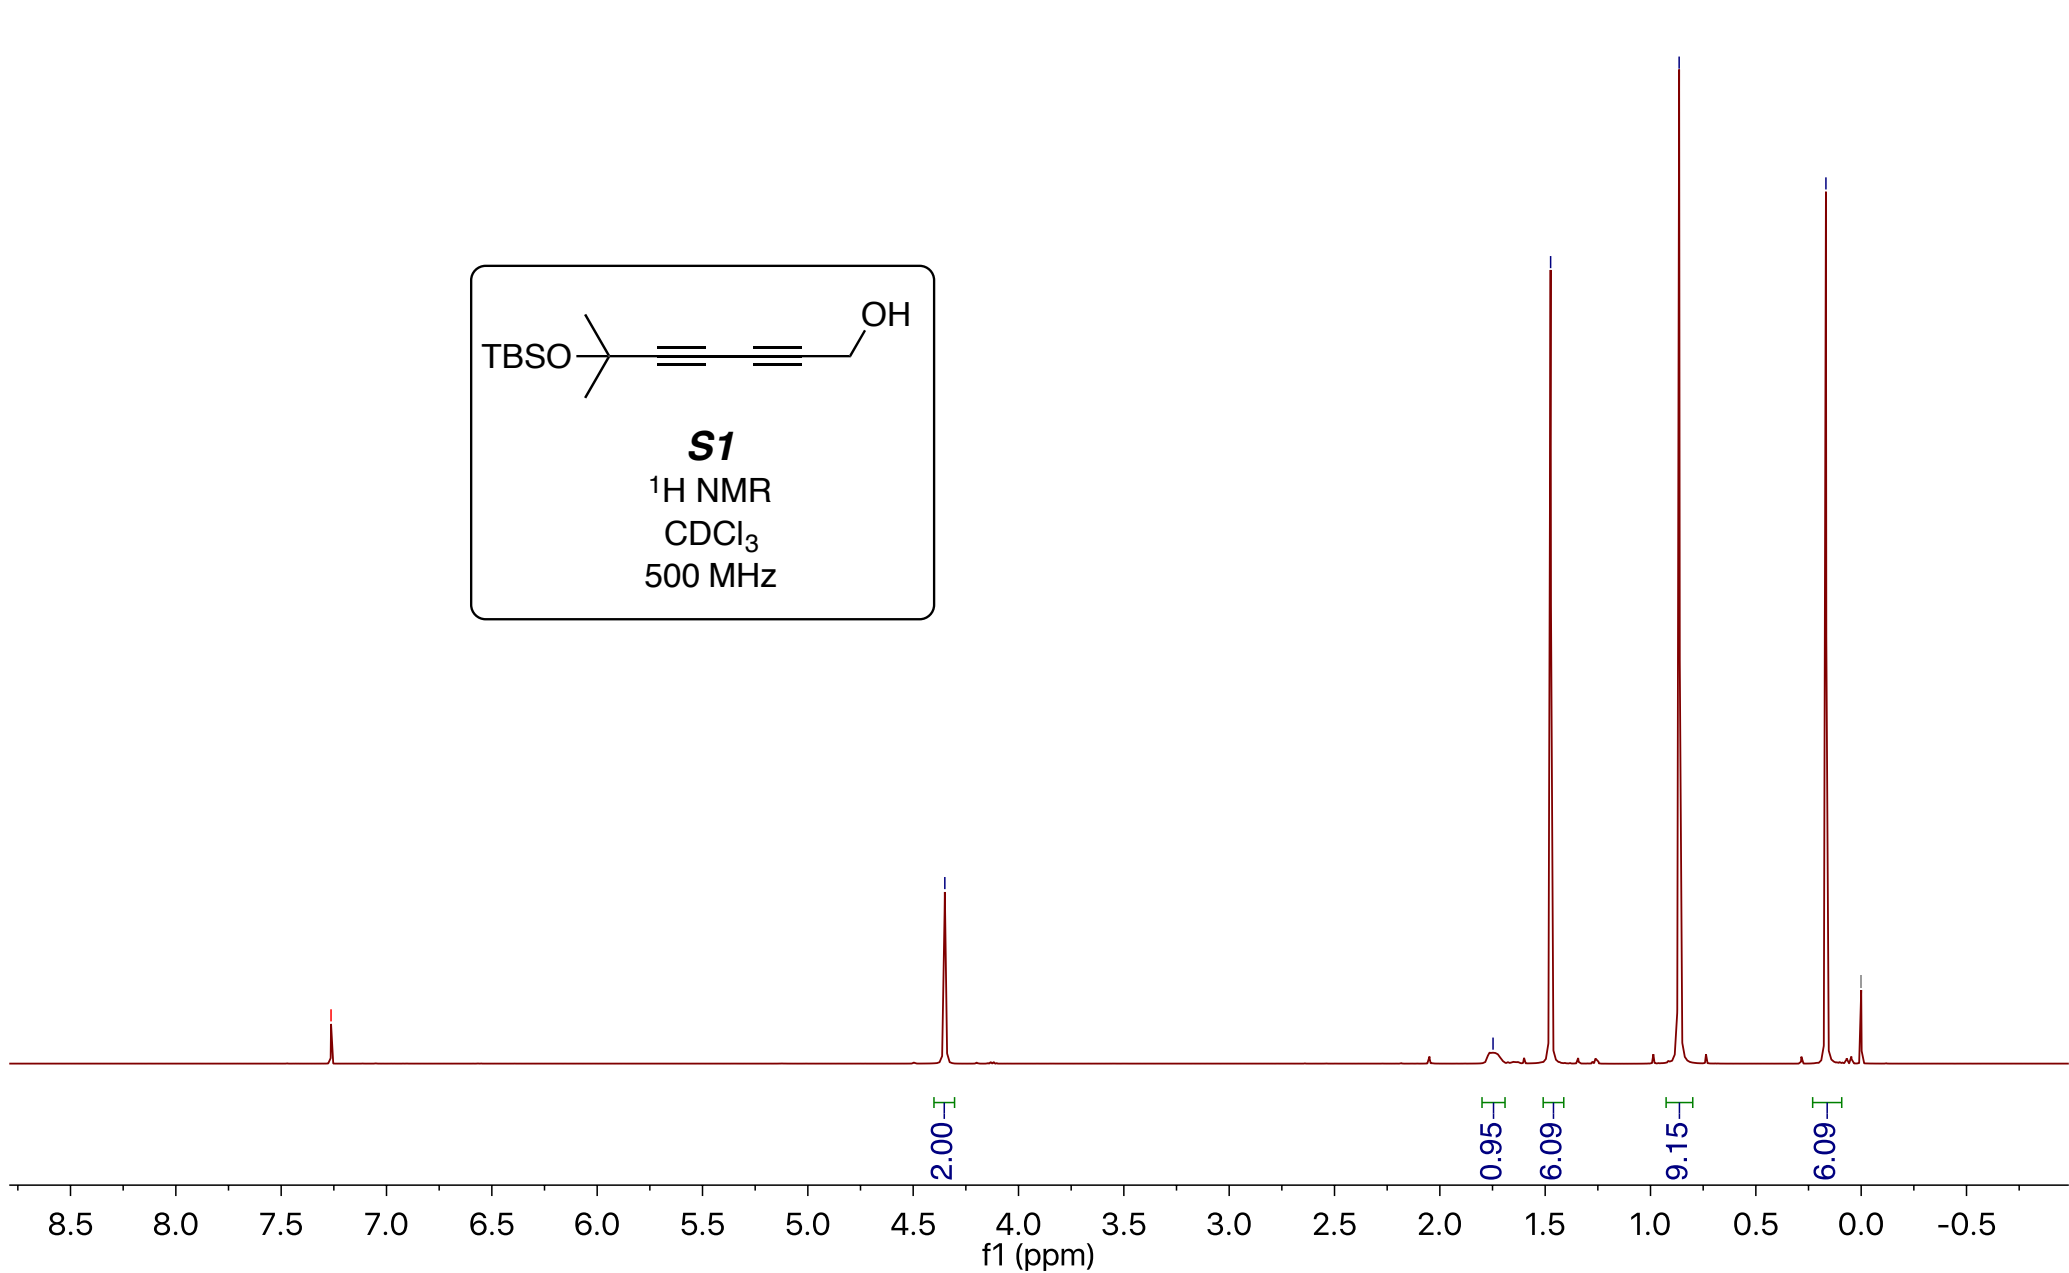

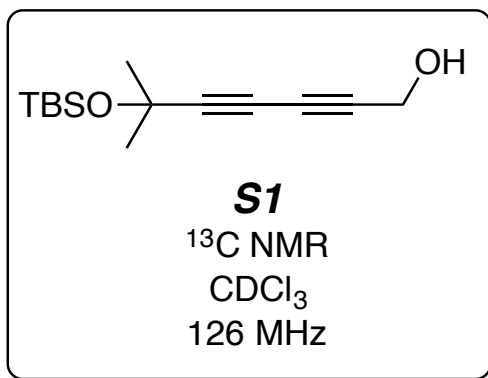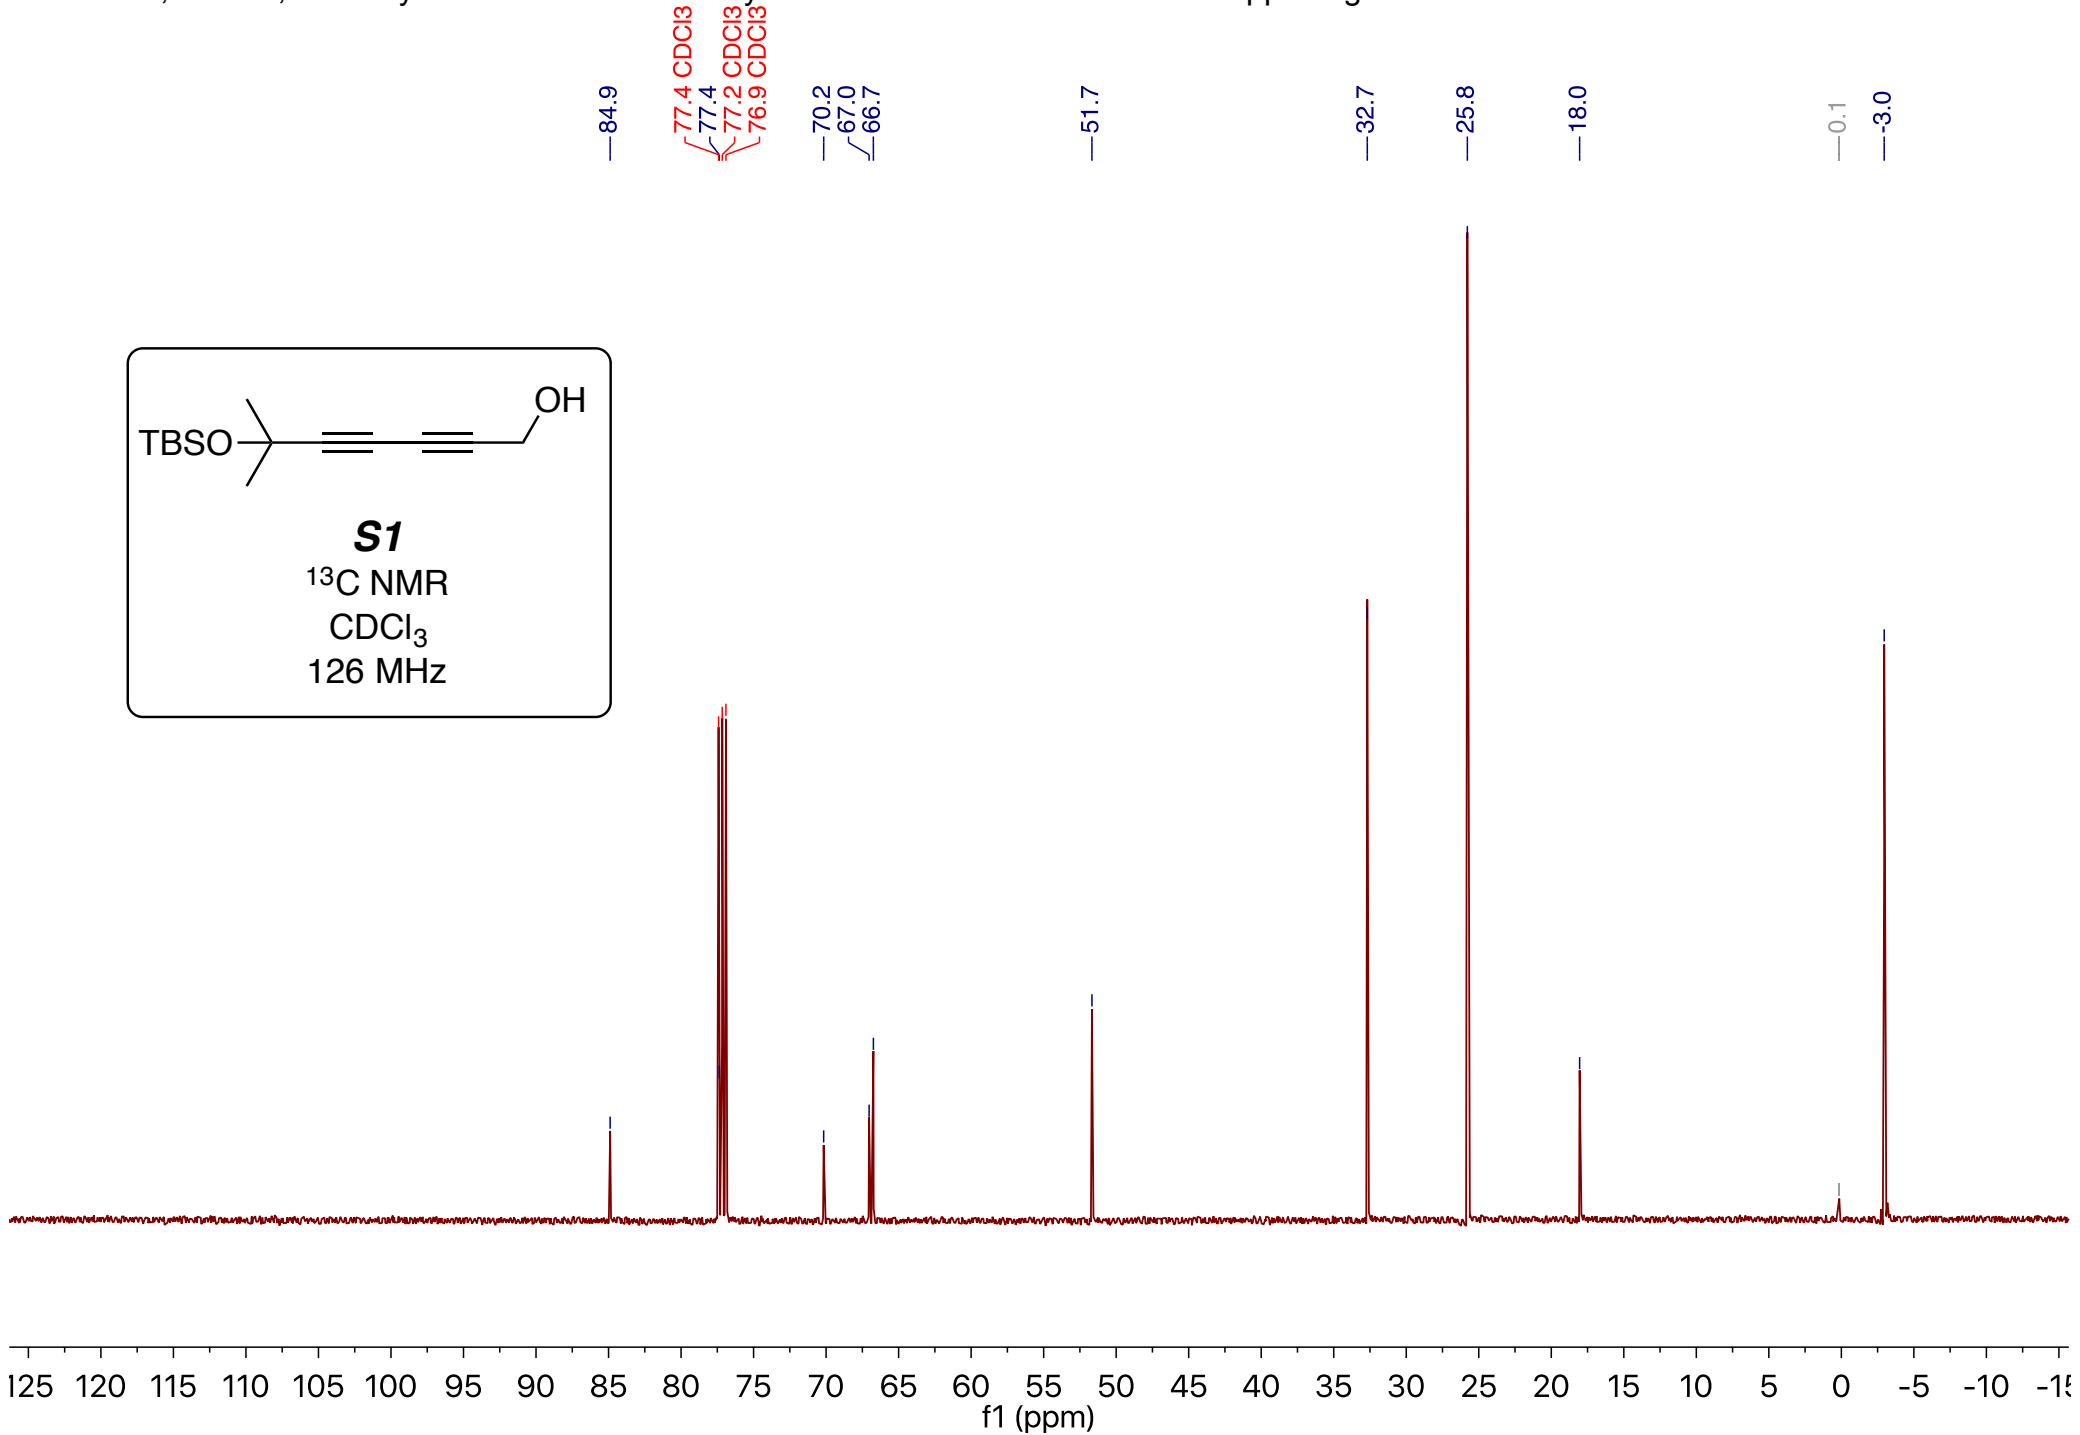

—7.26 CDCl<sub>3</sub>

—4.86

—2.96

—1.47

—0.92  
—0.86

—0.16

—0.00

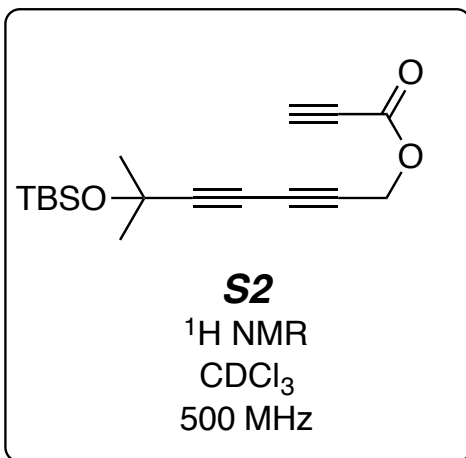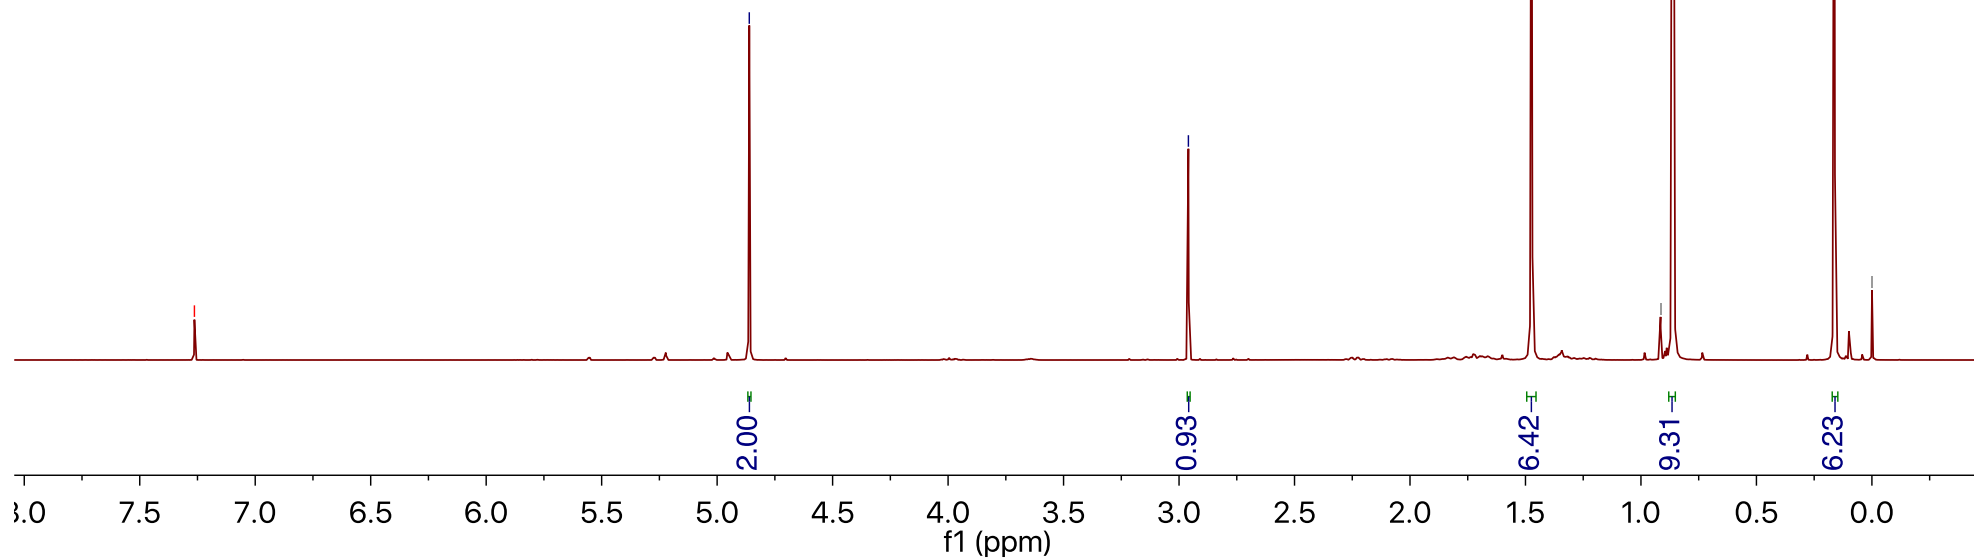

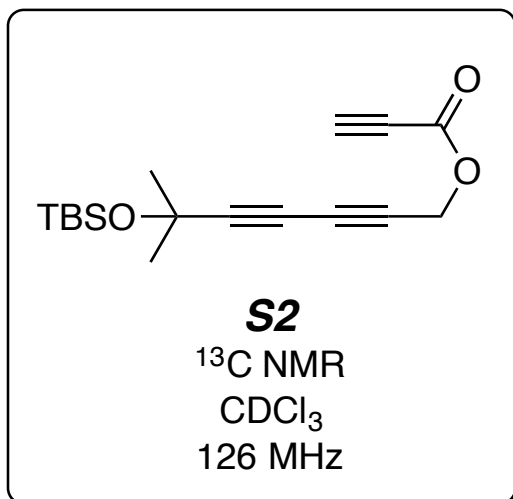

—151.8

85.7

77.4  $\text{CDCl}_3$ 77.2  $\text{CDCl}_3$ 76.9  $\text{CDCl}_3$ 

76.2

73.9

72.0

71.5

66.7

66.7

—54.1

34.4

32.6

28.6

25.8

—18.0

—-2.9

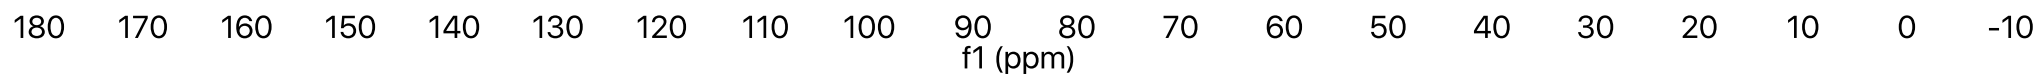

—7.26 CDCl<sub>3</sub>4.58  
4.57  
4.56  
4.55  
4.34

—1.75

1.43  
1.42

—0.90

0.13  
0.11  
-0.00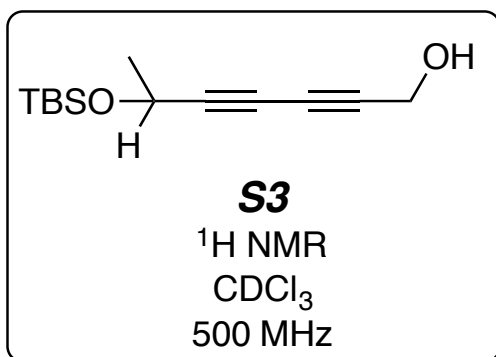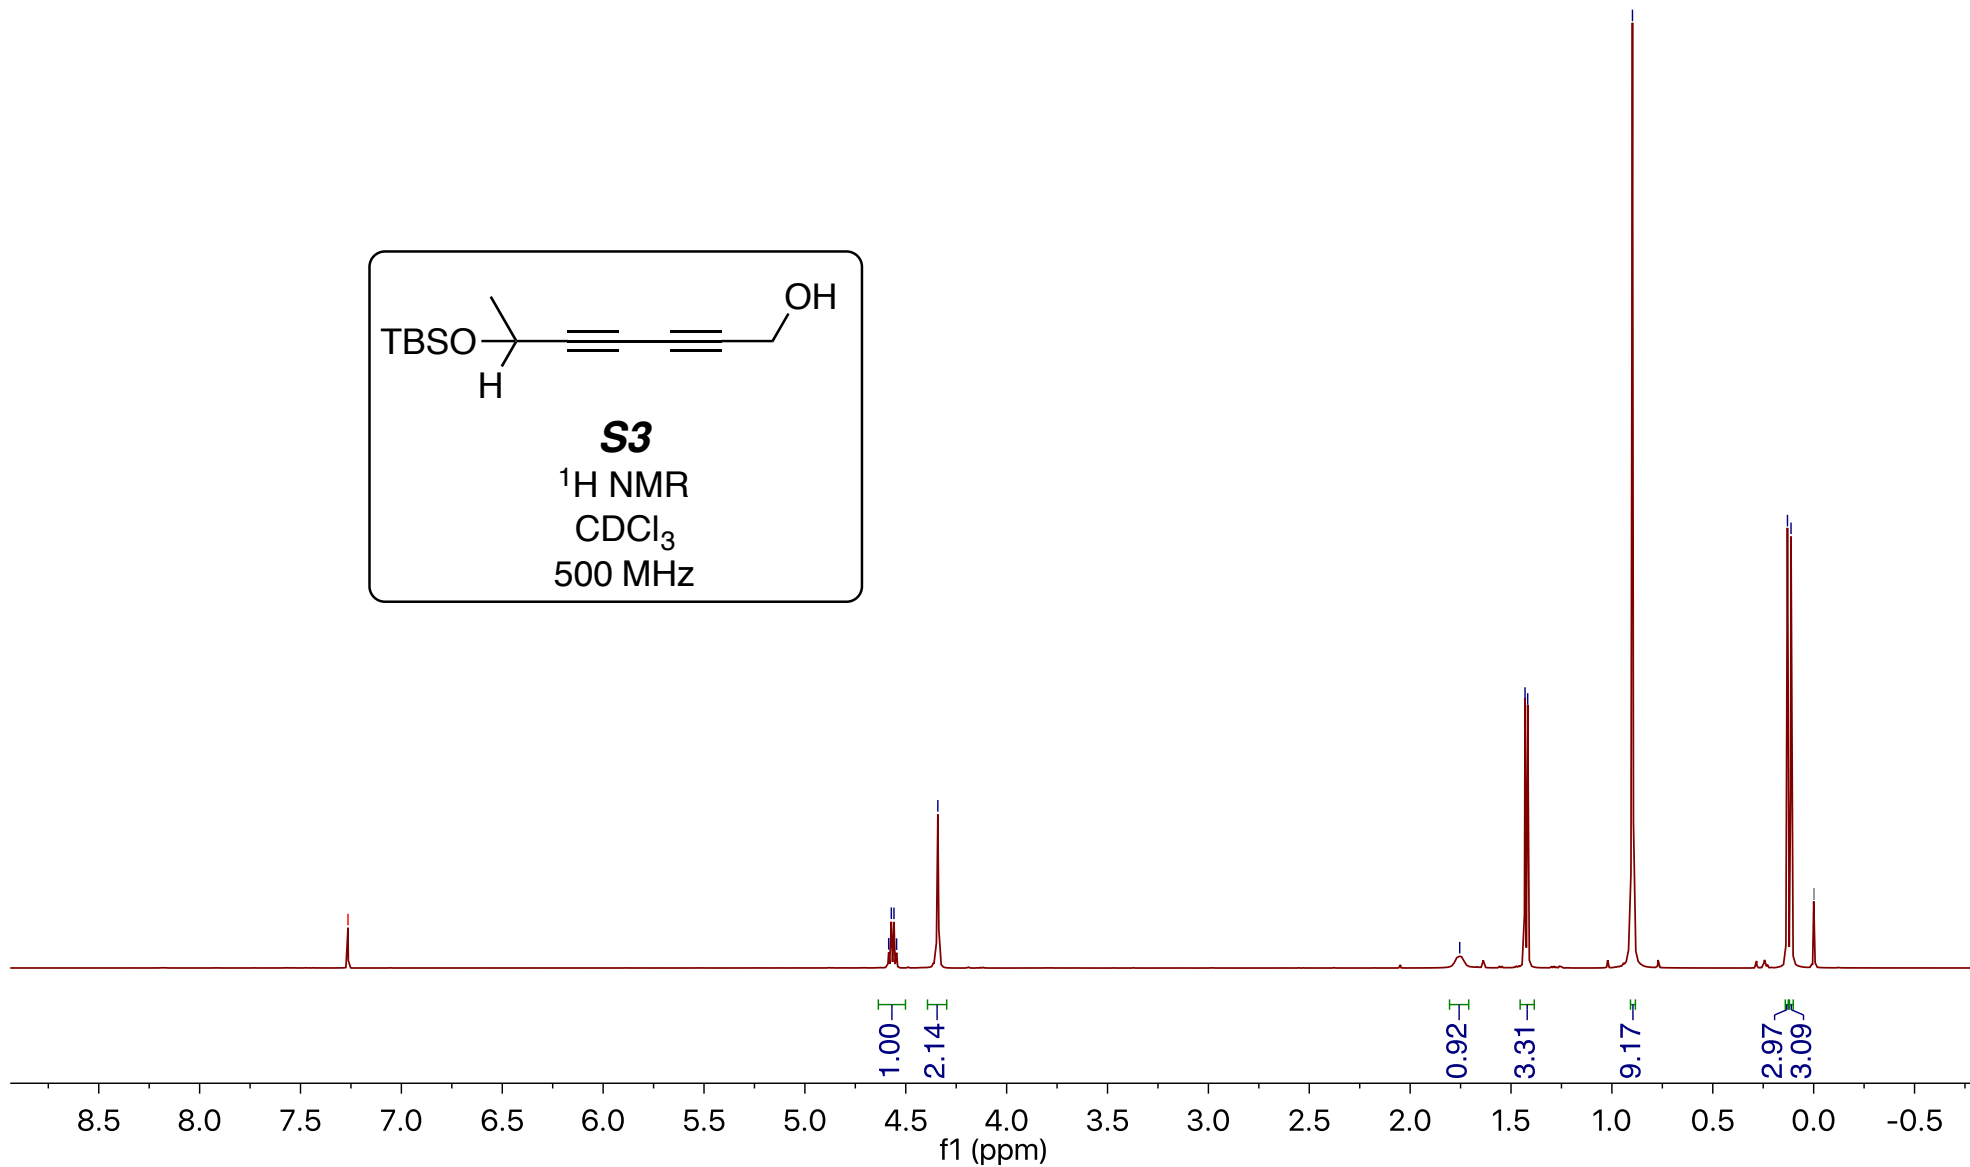



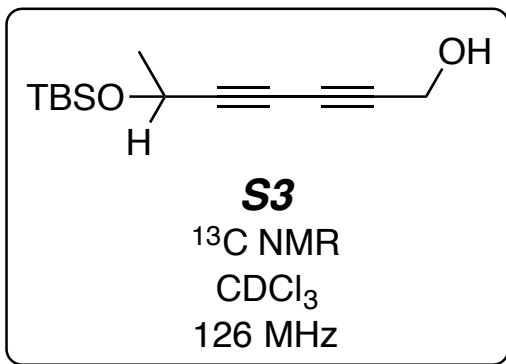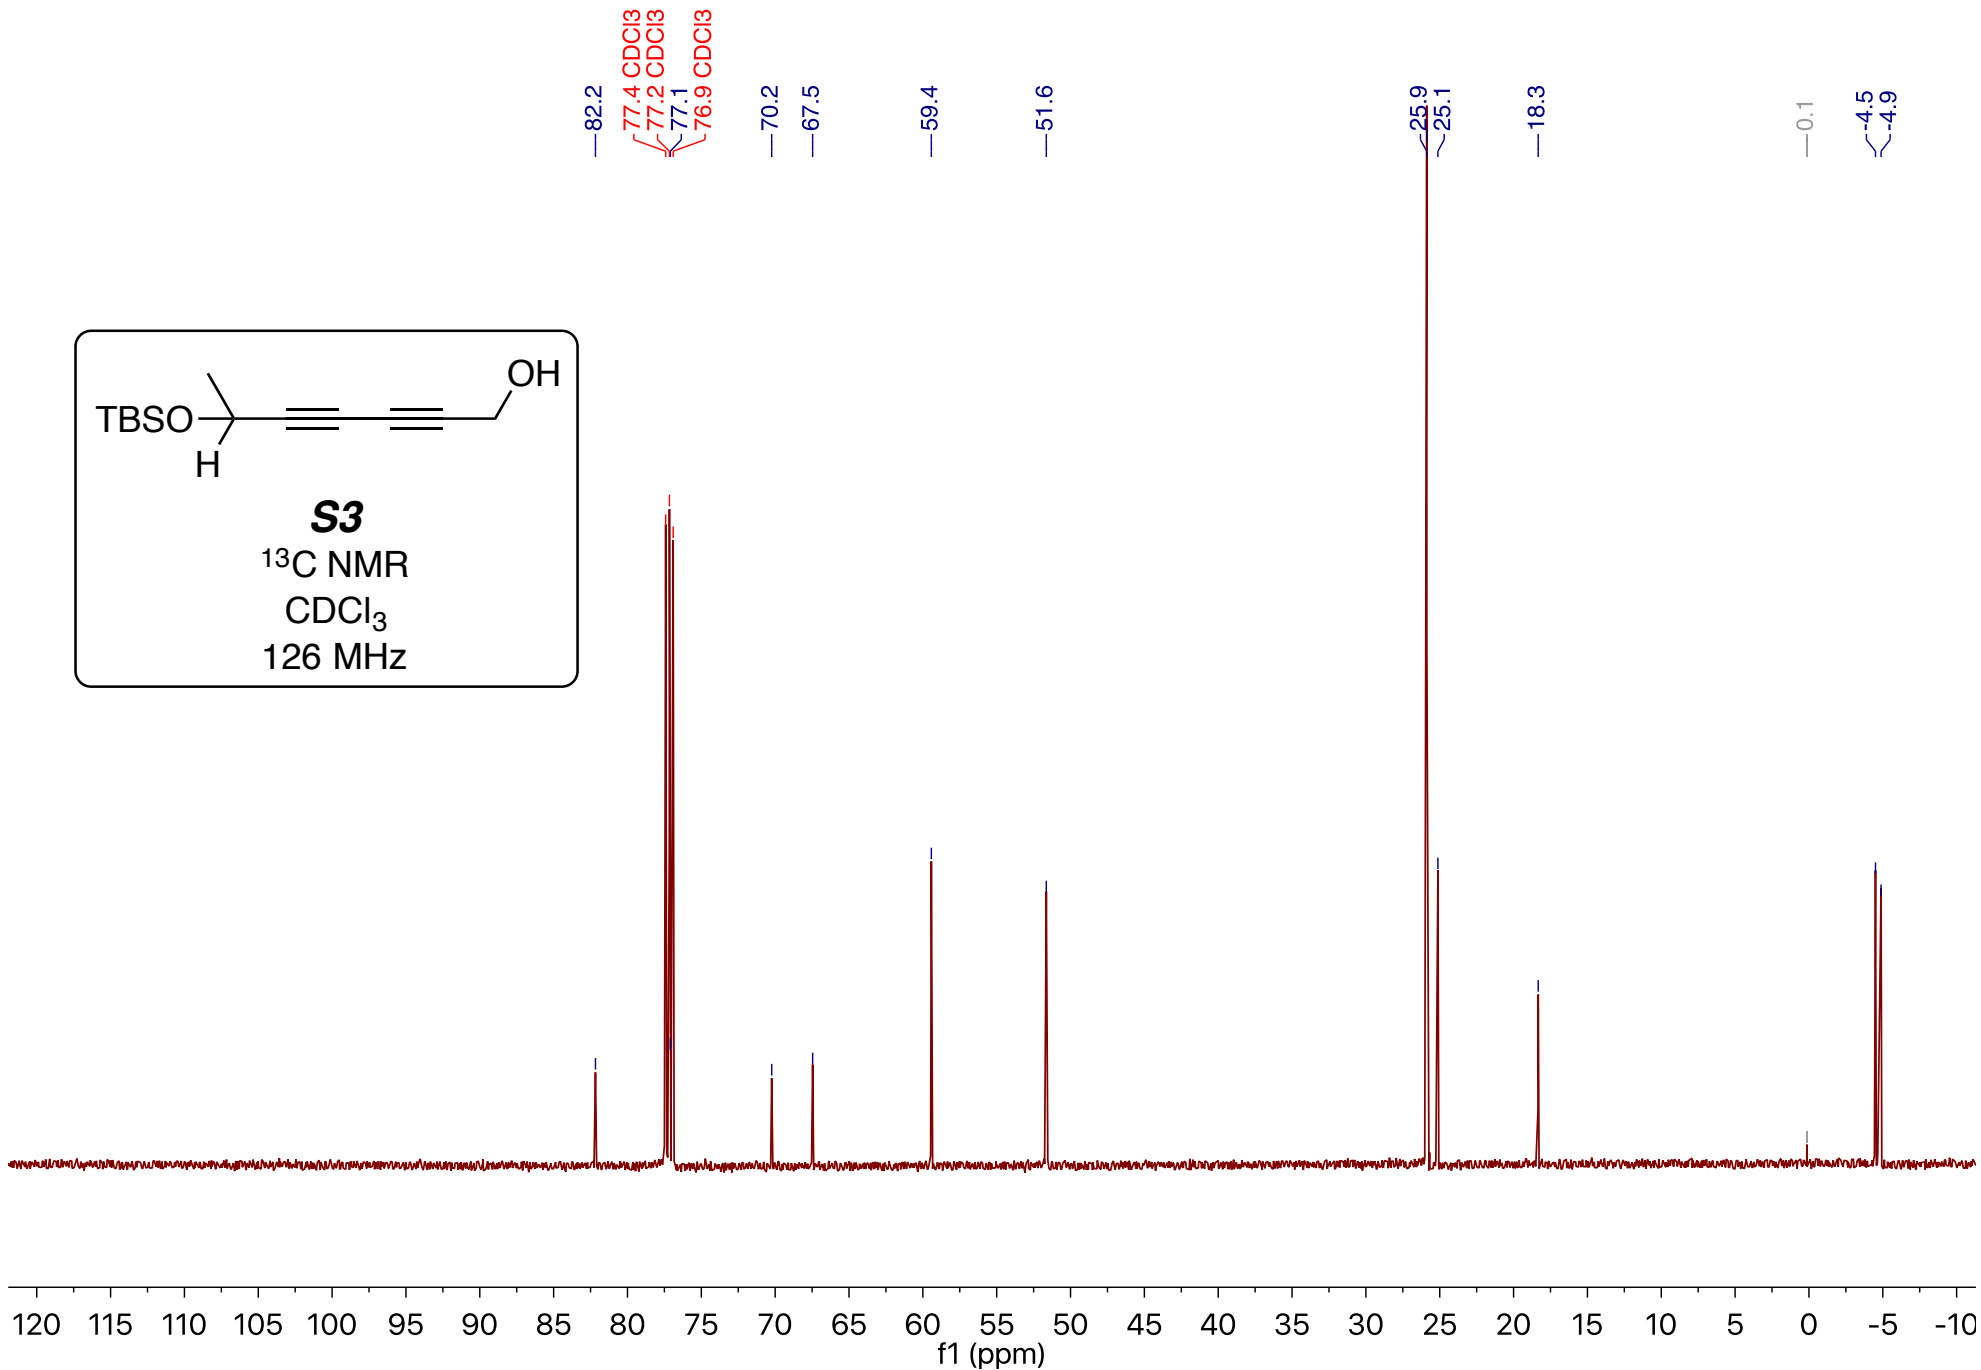

-7.27 CDCl<sub>3</sub>-4.85  
-4.58  
-4.57  
-4.55  
-4.54

-2.96

-1.43  
-1.42

-0.90

-0.13  
-0.11  
-0.00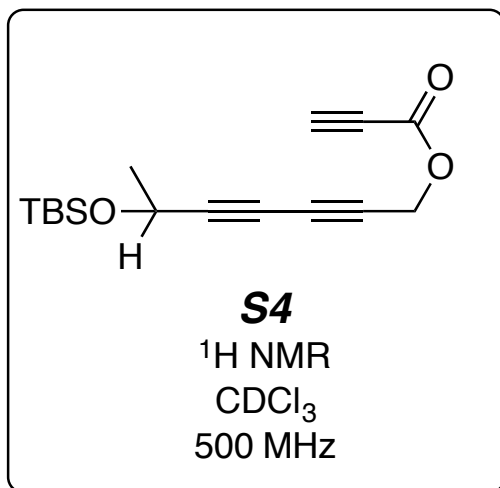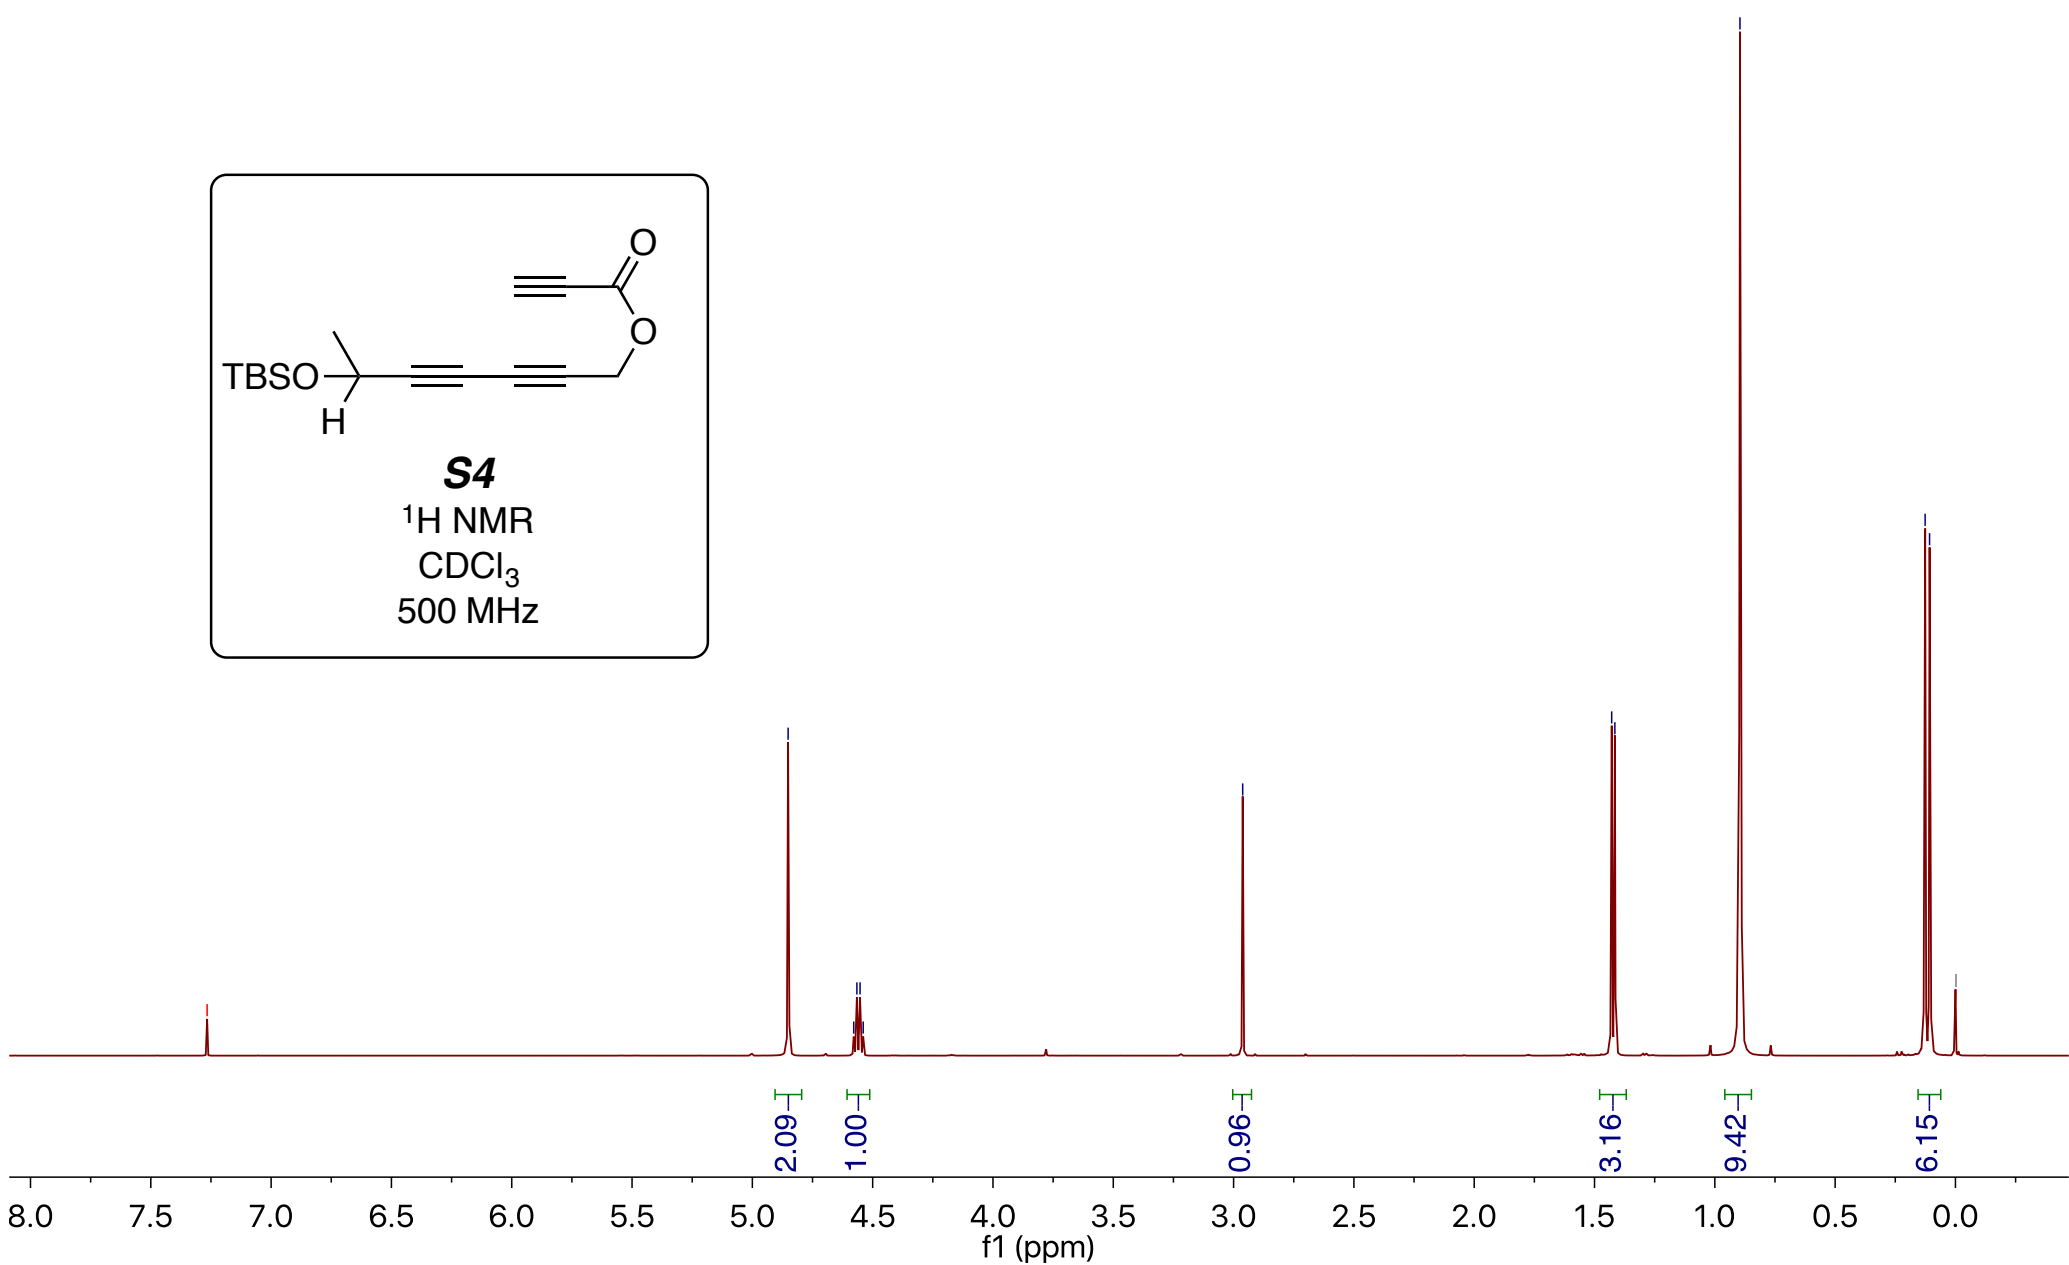

—151.8

—83.1  
77.4 CDCl<sub>3</sub>  
77.2 CDCl<sub>3</sub>  
76.9 CDCl<sub>3</sub>  
76.2  
73.9  
72.0  
71.2  
67.1

—59.4

—54.1

—25.9

—25.0

—18.3

—0.1

—4.5

—4.9

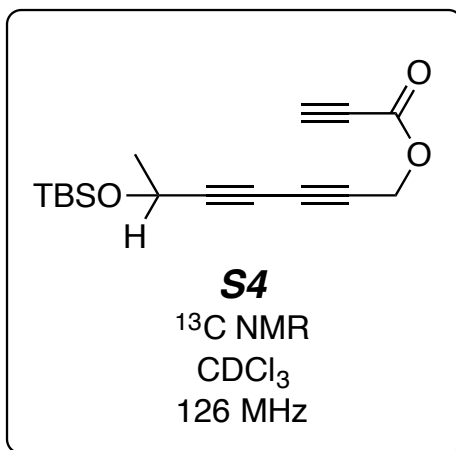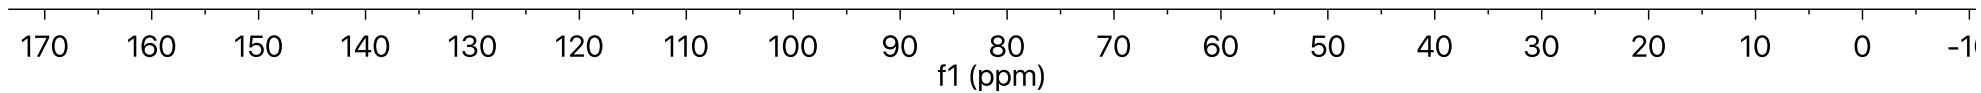

7.59  
7.56  
— 7.26 CDCl<sub>3</sub>

5.33  
5.31  
4.82  
4.76  
4.57

— 2.94

1.36  
1.35  
1.34  
1.33  
1.32  
1.31  
1.30  
0.88  
0.87  
0.87  
0.86  
0.85  
0.85  
0.84  
0.84  
0.82  
0.81  
0.80  
0.80  
0.79  
0.79  
0.78  
— 0.00

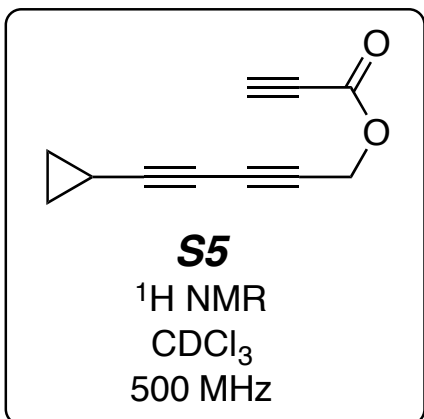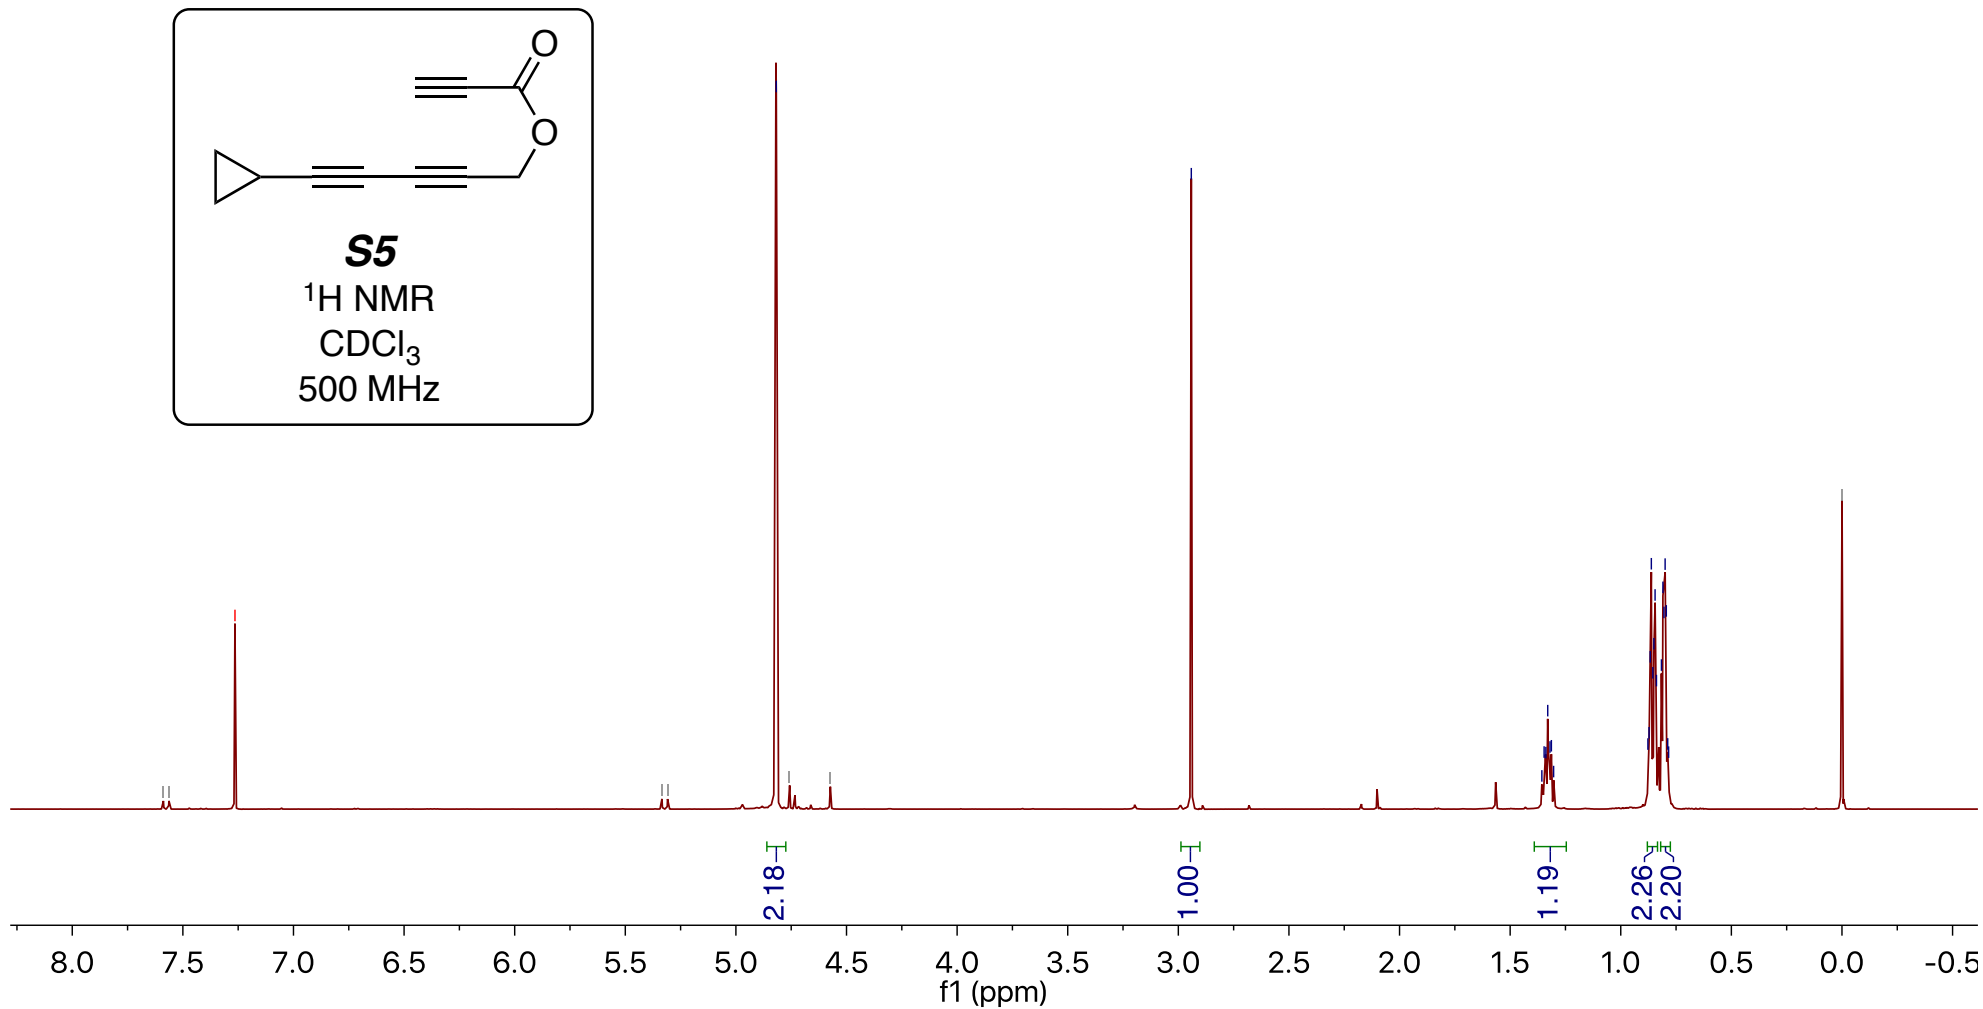

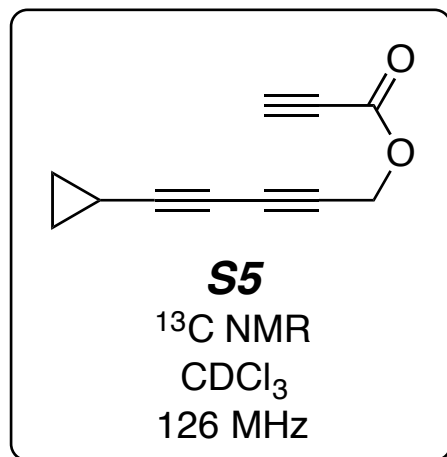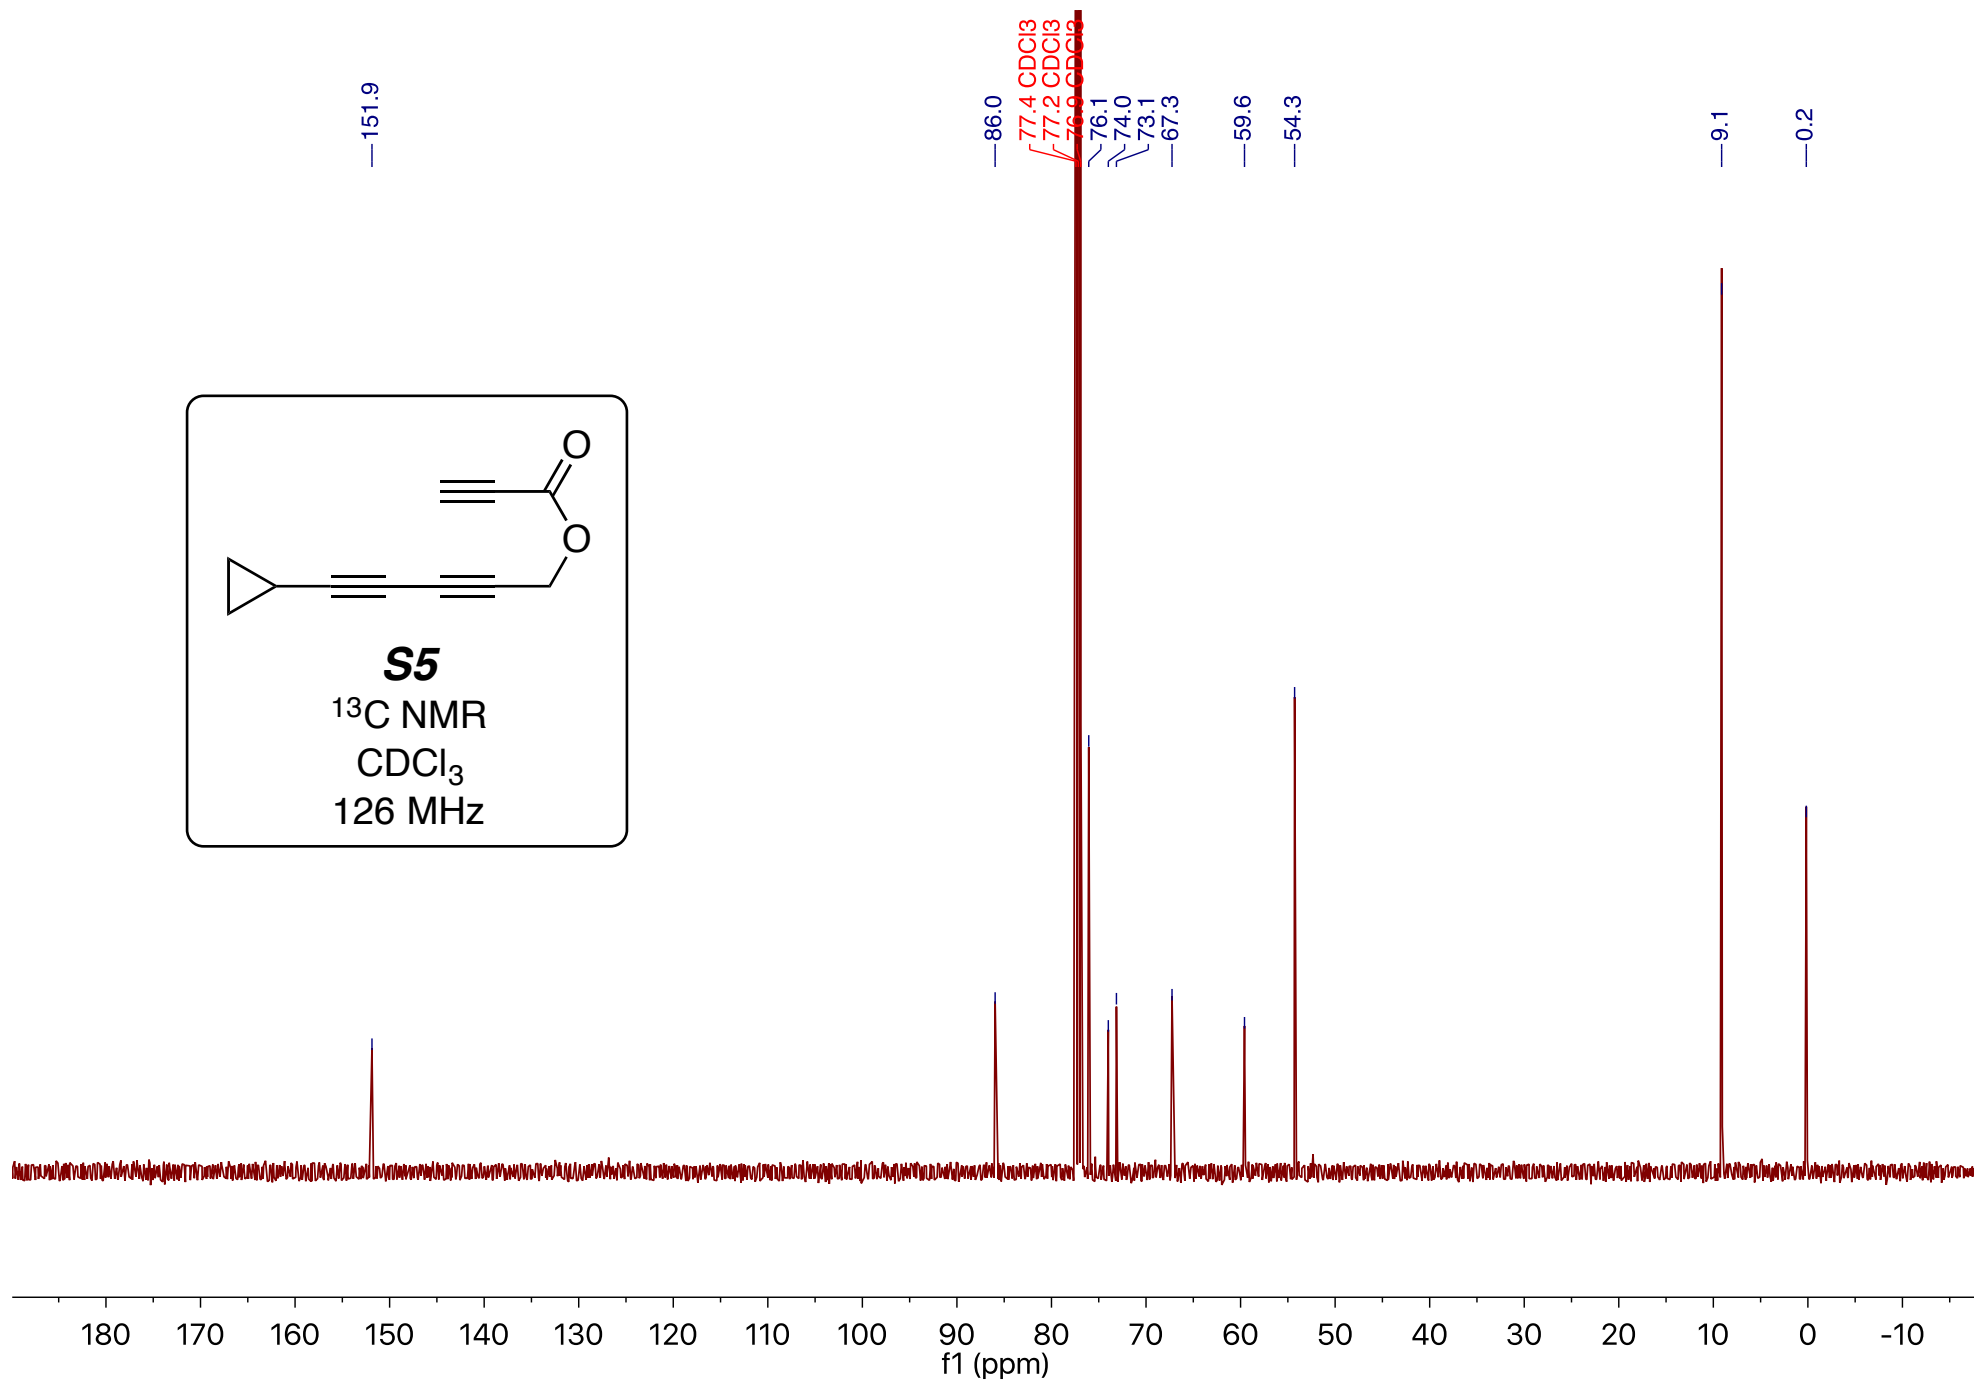

-7.28 CDCl<sub>3</sub>

-4.80

-1.24

-0.25

-0.17

-0.00

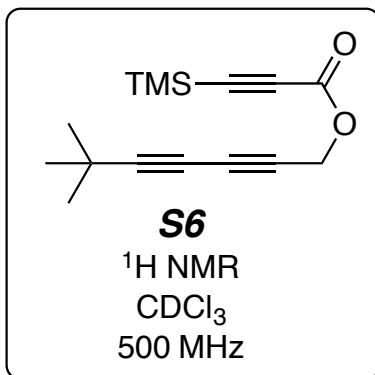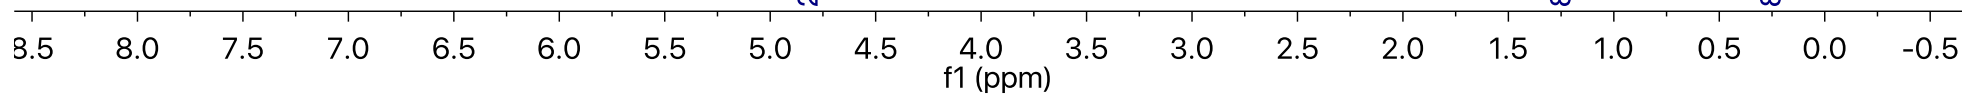

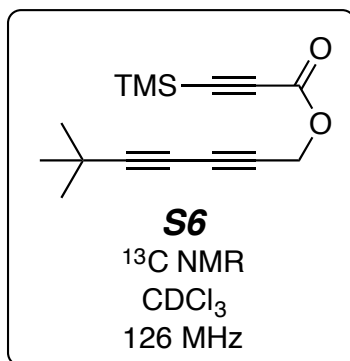

—152.1

~95.8

~93.7

~90.1

77.4  $\text{CDCl}_3$ 77.2  $\text{CDCl}_3$ 76.9  $\text{CDCl}_3$ 

~72.4

~69.3

—63.0

—53.8

~35.0

~30.4

~28.1

—0.8

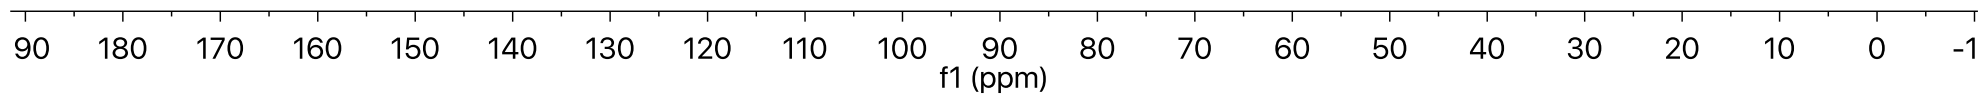

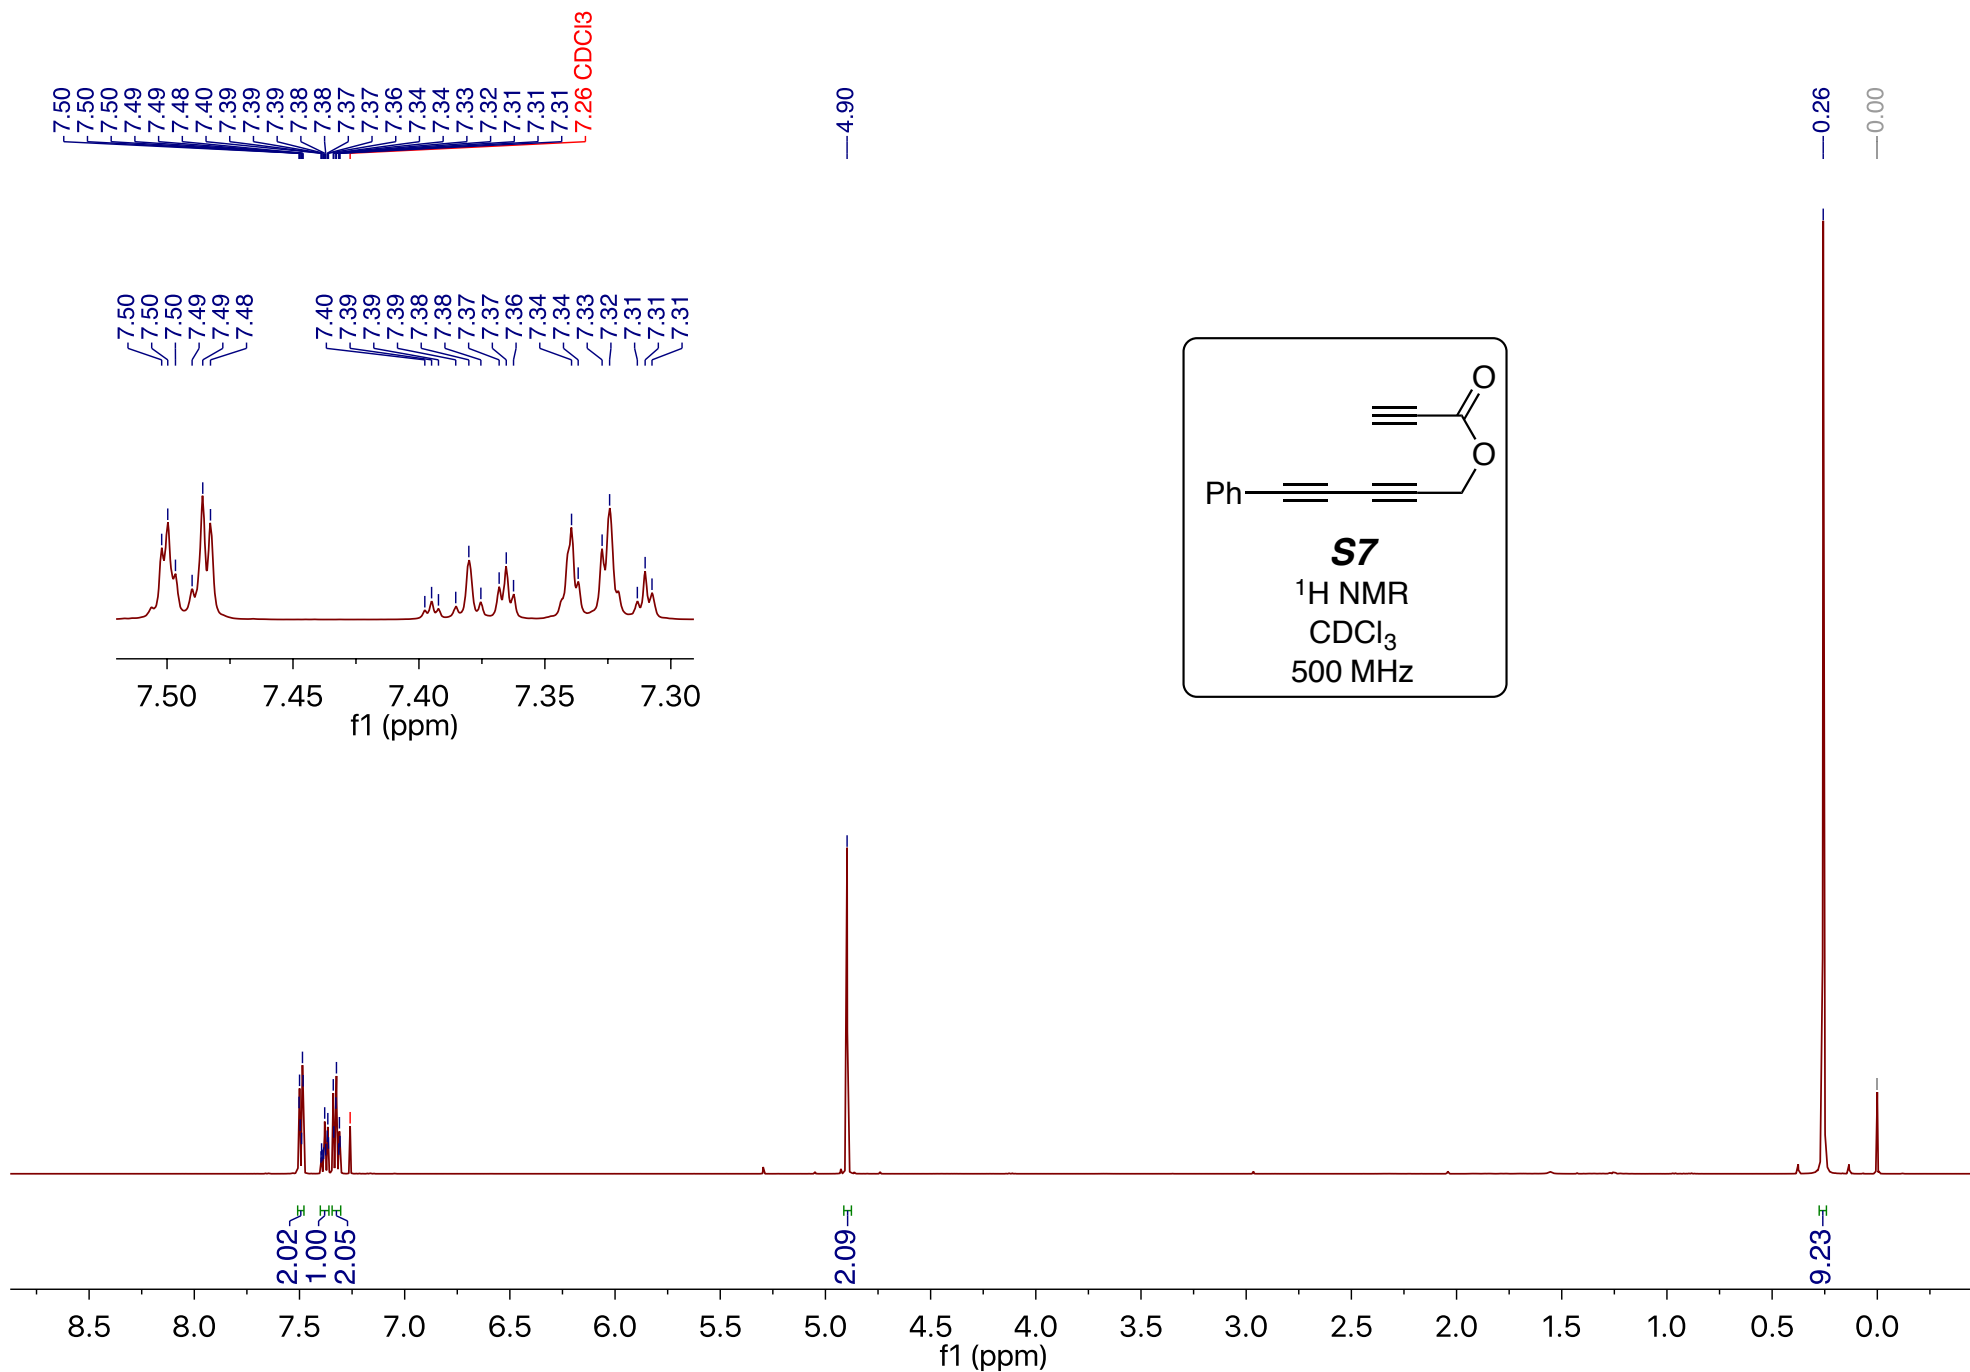



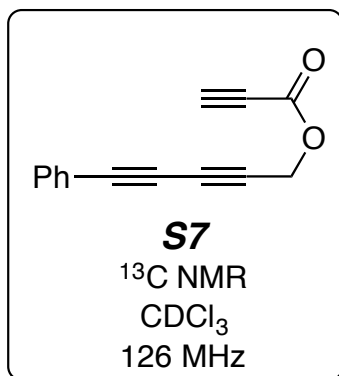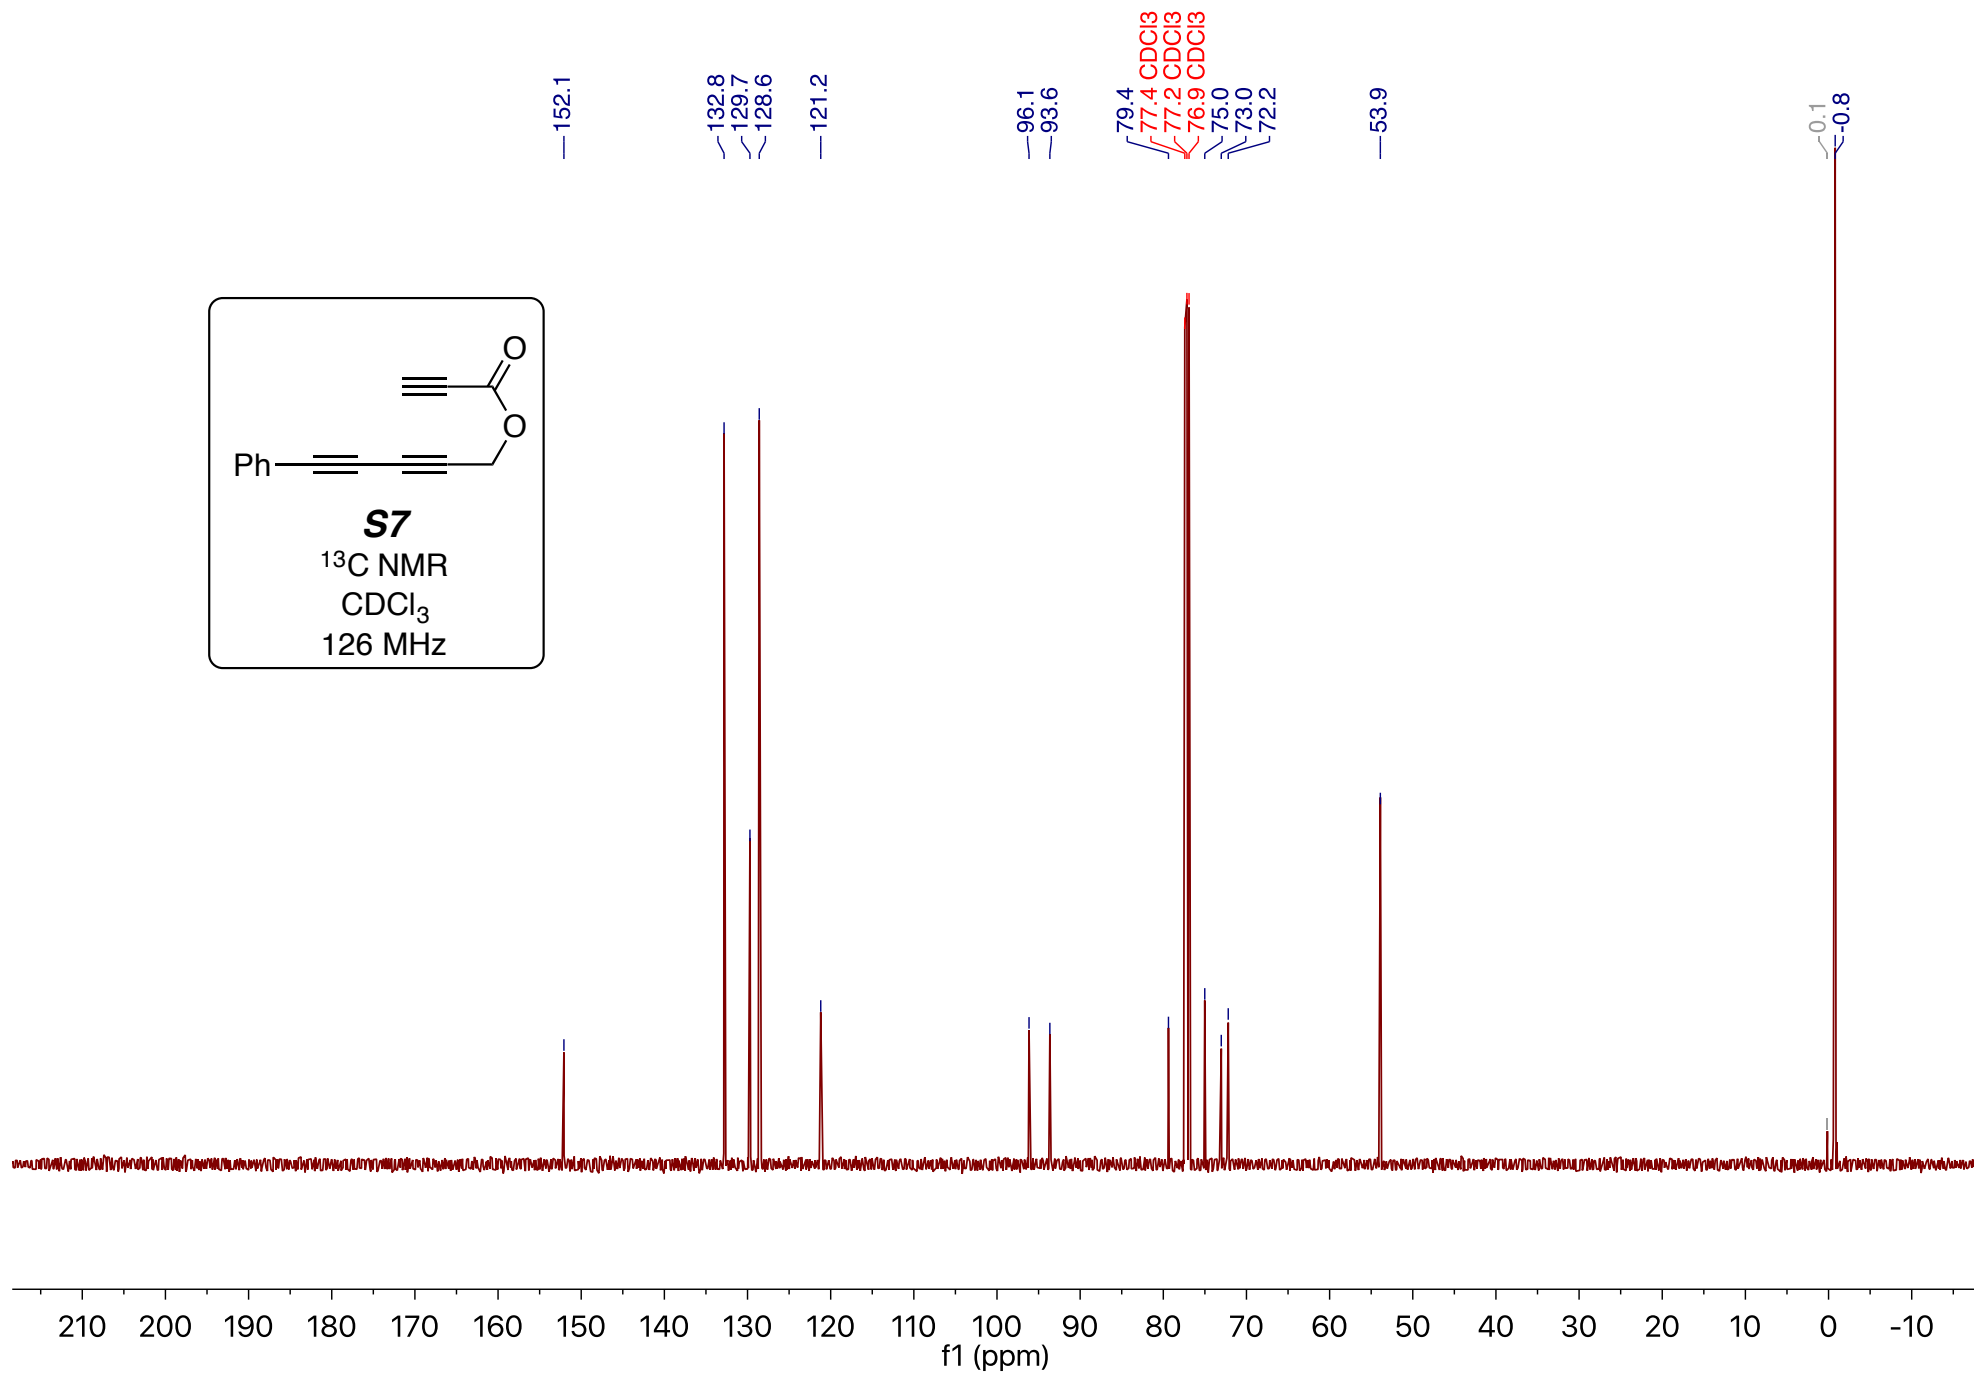

7.46  
7.46  
7.45  
7.45  
7.28  
7.27  
7.27  
7.26 CDCl<sub>3</sub>  
7.25  
7.25  
7.21  
7.19  
7.15  
7.14  
7.12

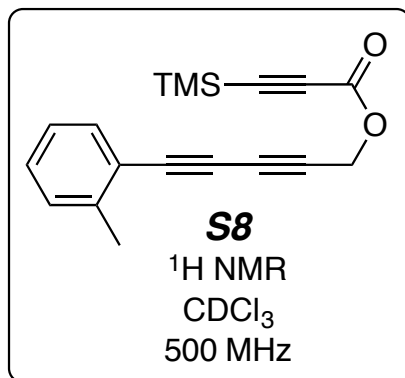

—4.91

—2.44

—1.55 HDO

—1.24 grease

—0.26

—0.00

1.00

1.30

1.00

1.03

2.16

3.18

9.28

8.5

8.0

7.5

7.0

6.5

6.0

5.5

5.0

4.5

4.0

3.5

3.0

2.5

2.0

1.5

1.0

0.5

0.0

-0.5

f1 (ppm)

—152.1

—142.1

~133.3

~129.7

~129.7

~125.8

—121.0

—96.1

—93.7

78.5

77.4 CDCl<sub>3</sub>77.2 CDCl<sub>3</sub>76.9 CDCl<sub>3</sub>

76.5

75.5

72.3

—54.0

—30.5

—20.8

~0.1

~0.8

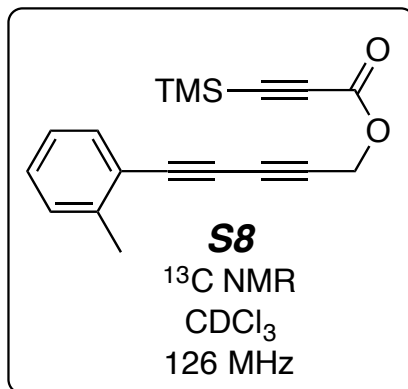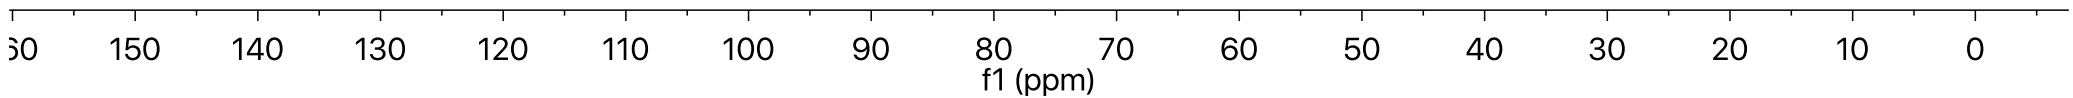

7.44  
7.42  
7.26 CDCl<sub>3</sub>

6.85  
6.83

4.89

3.81

0.25

-0.00

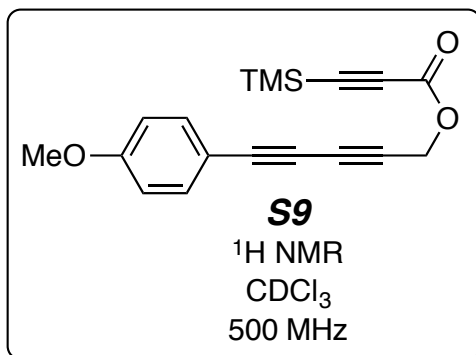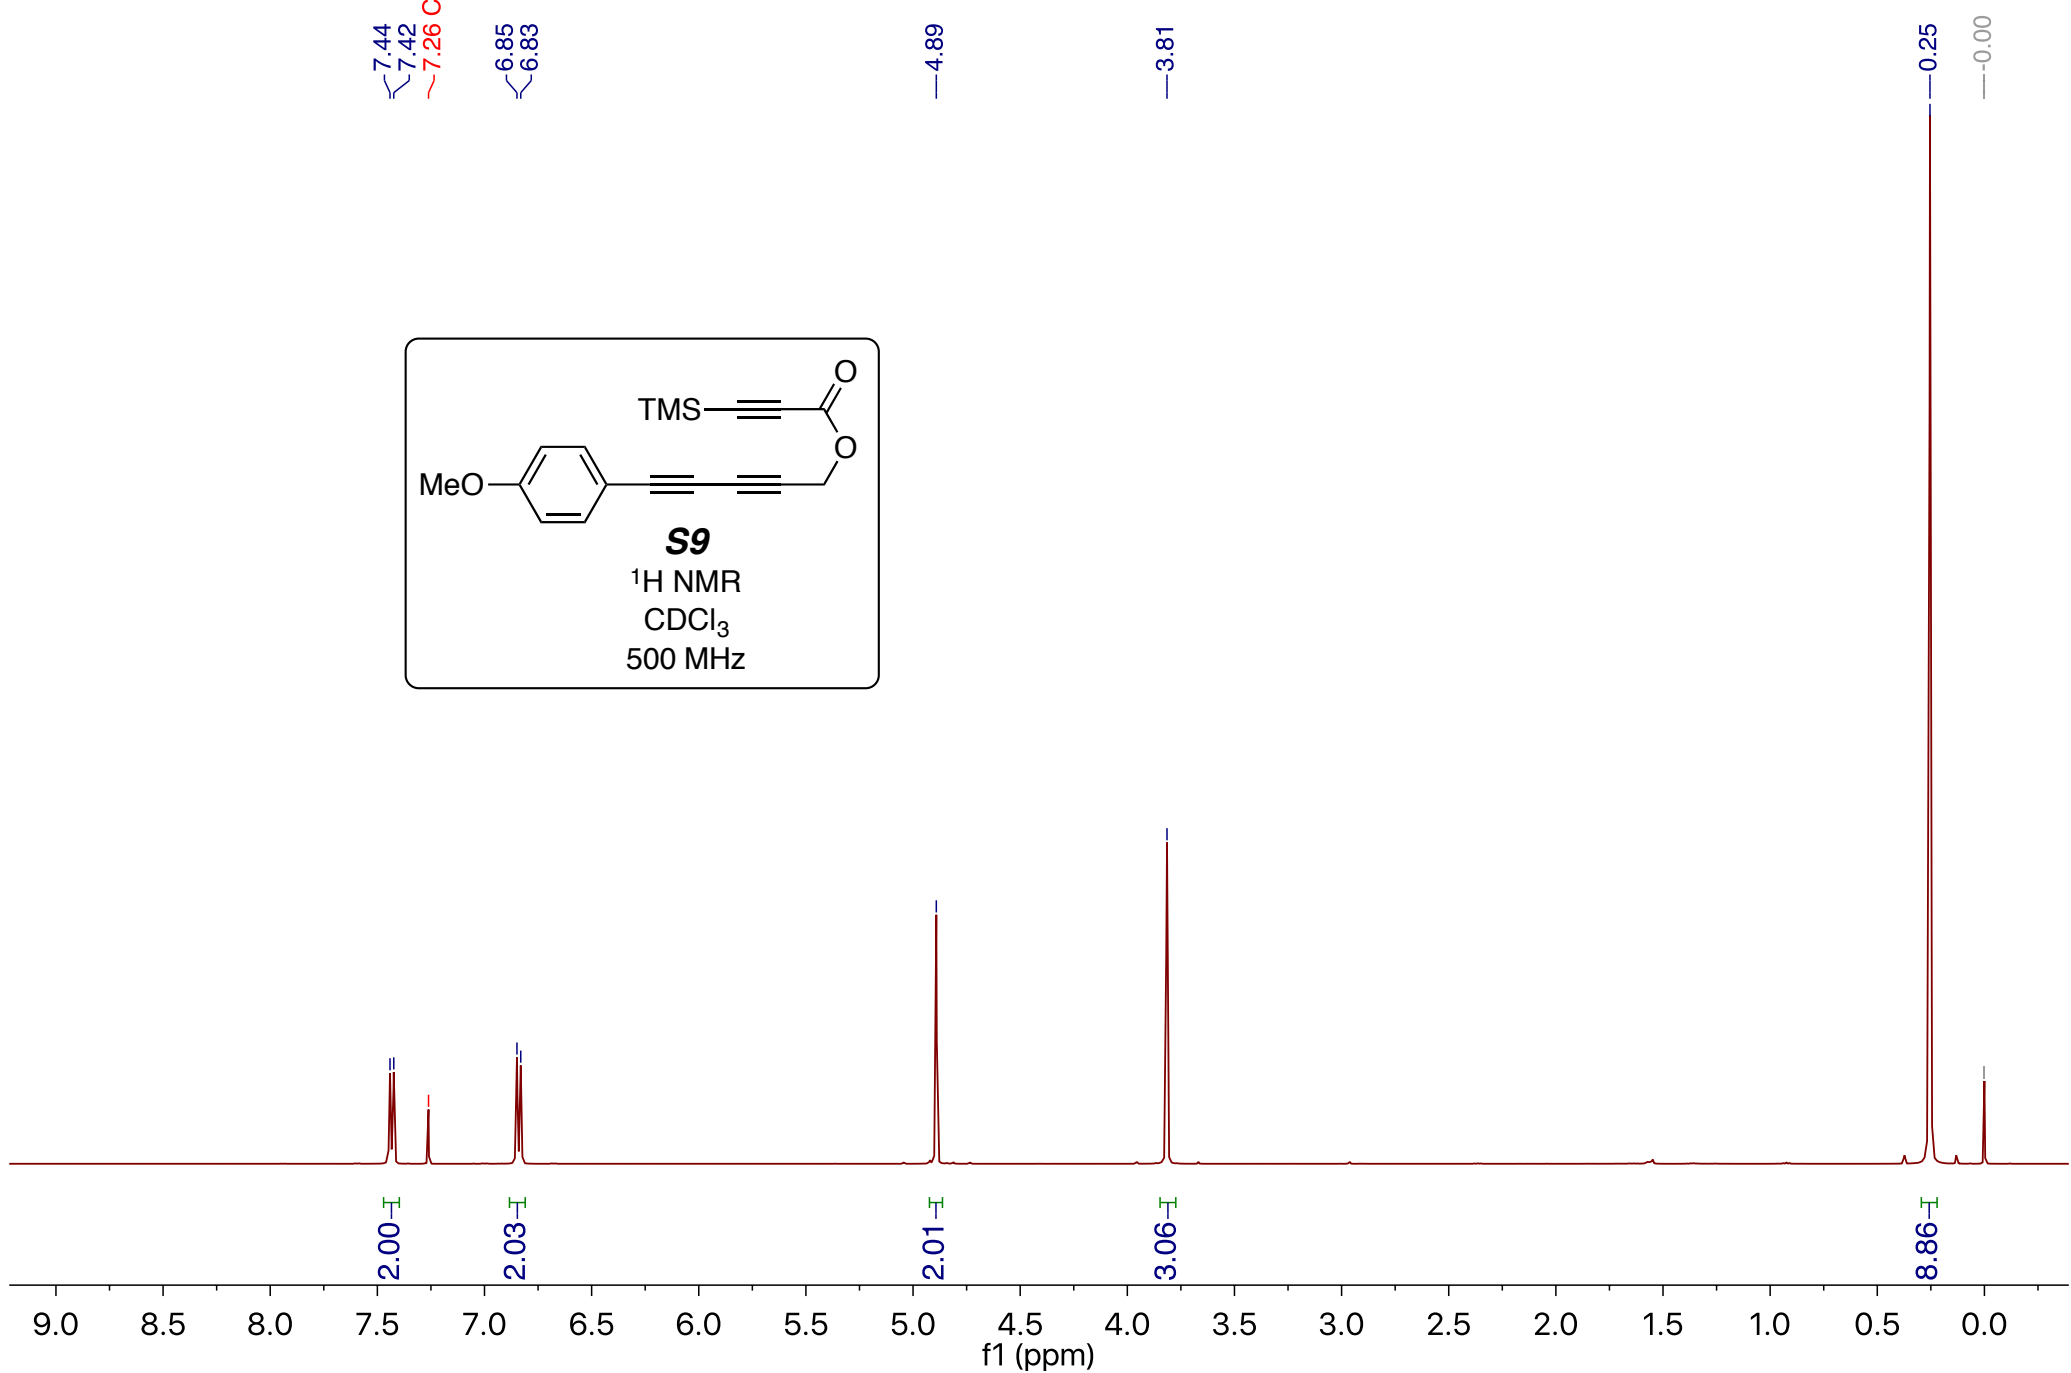

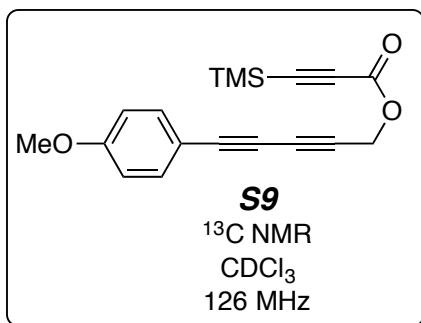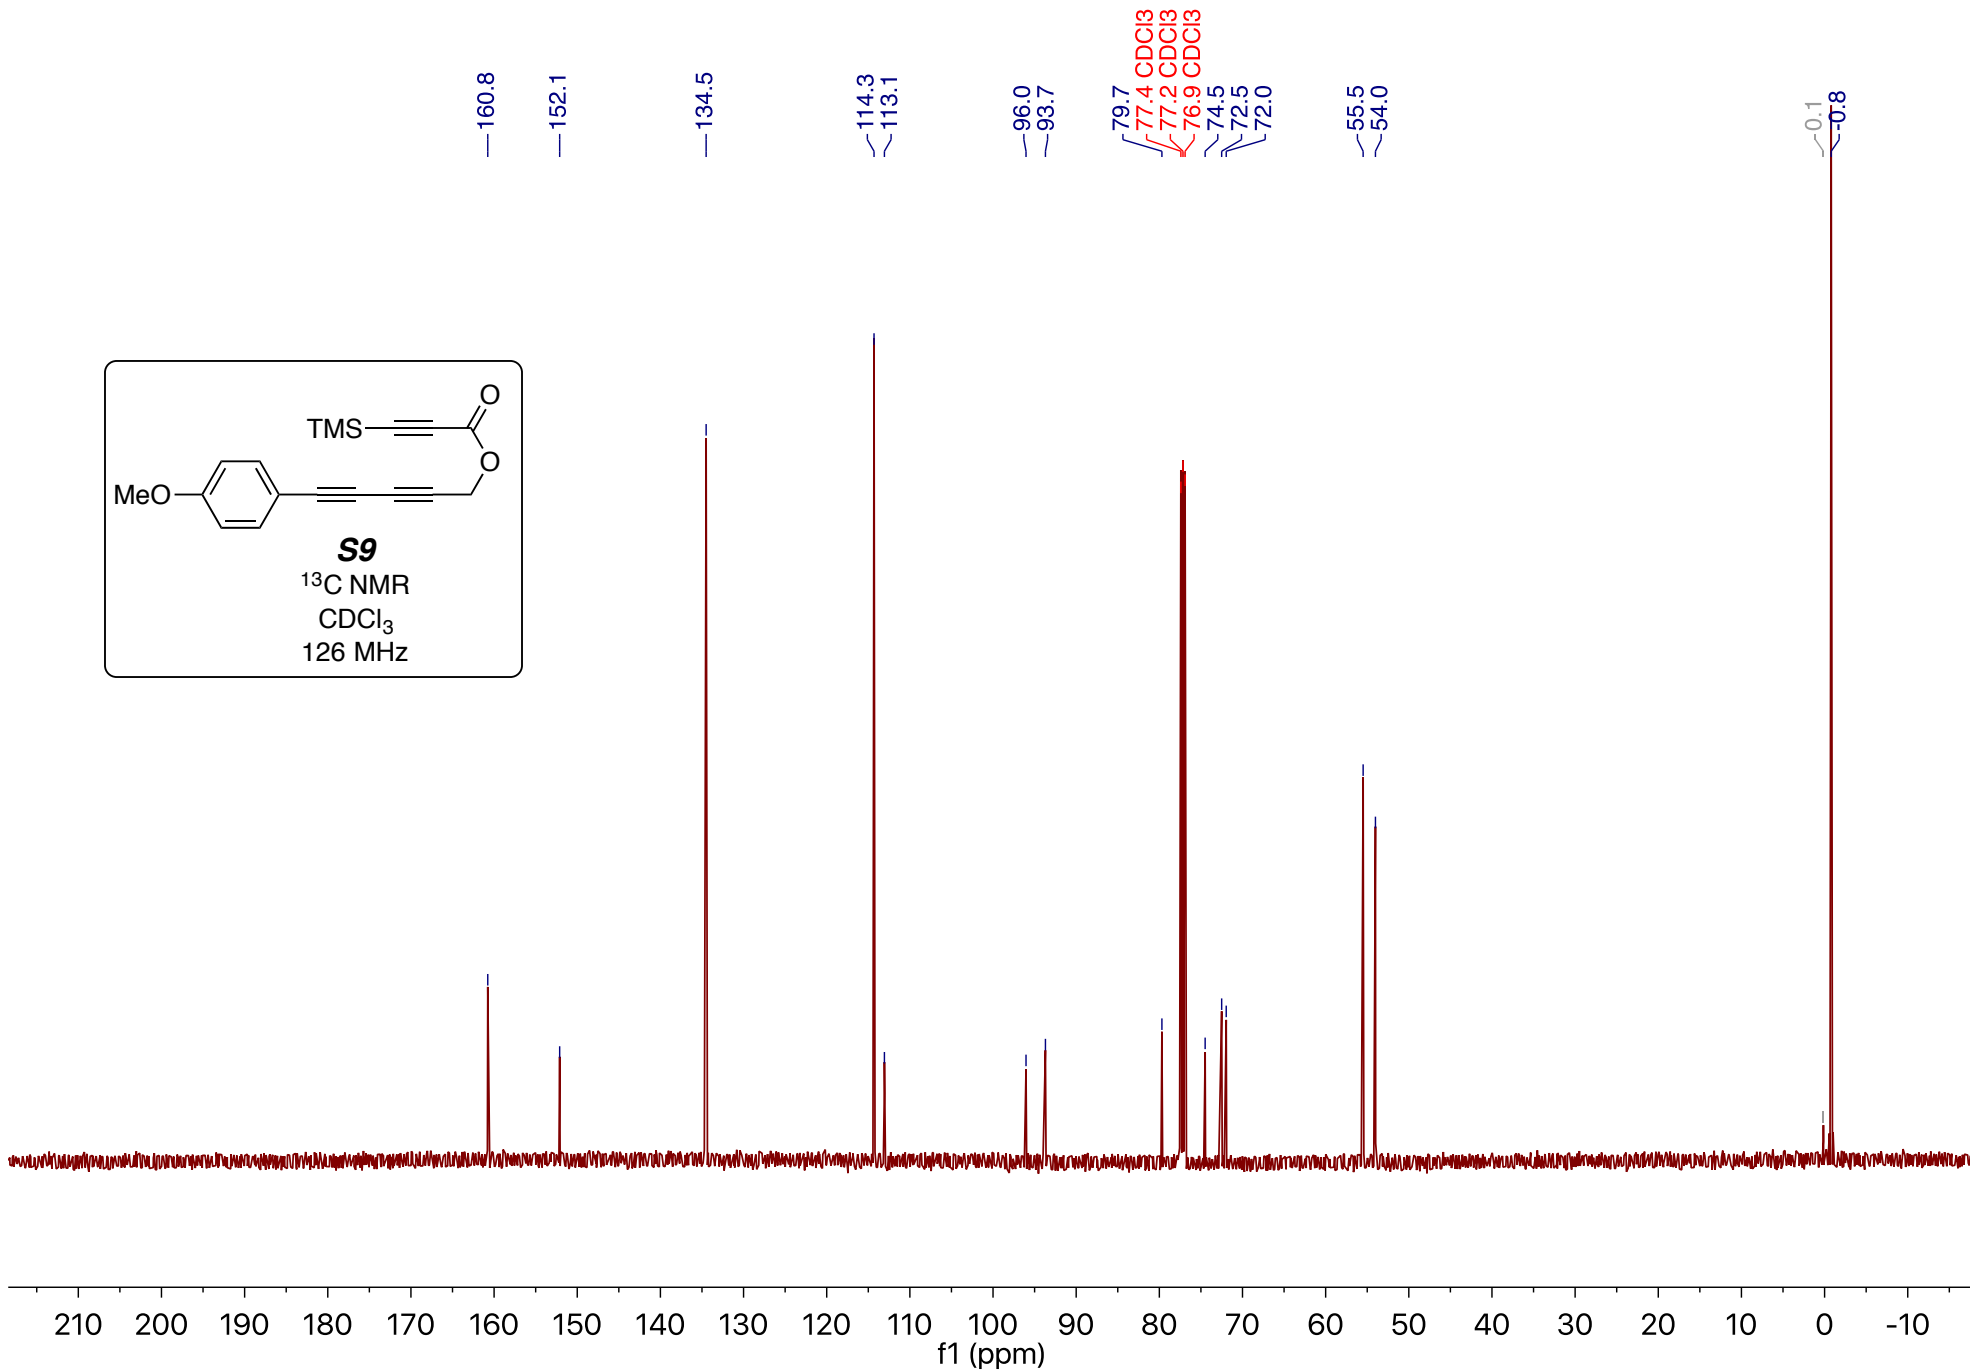

8.00  
7.997.56  
7.547.26 CDCl<sub>3</sub>

4.44

3.92

1.77

1.58 HDO

0.00

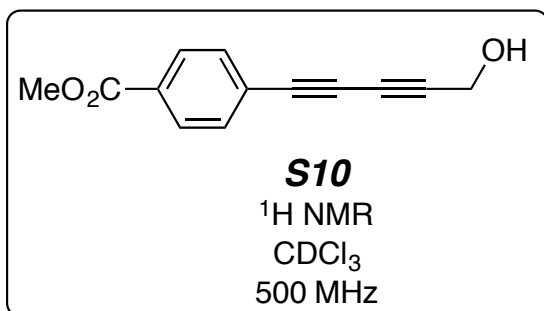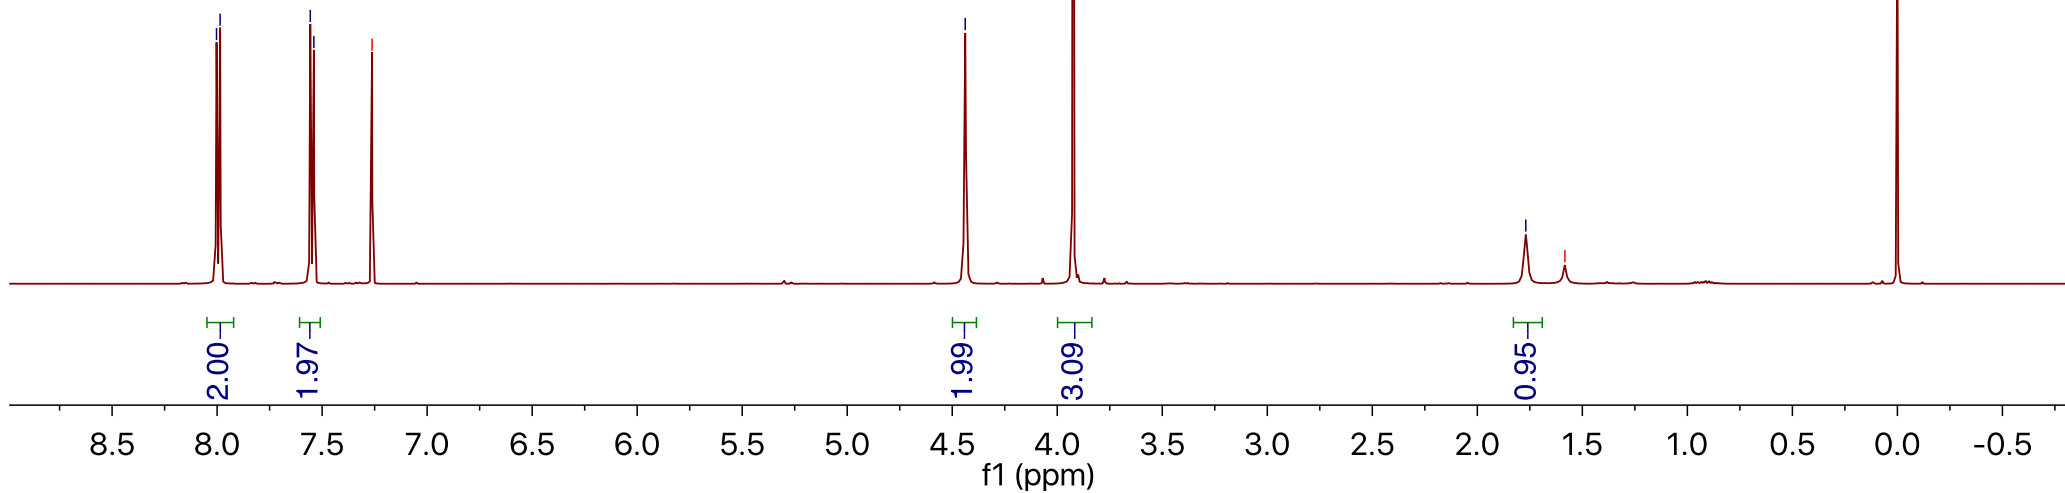

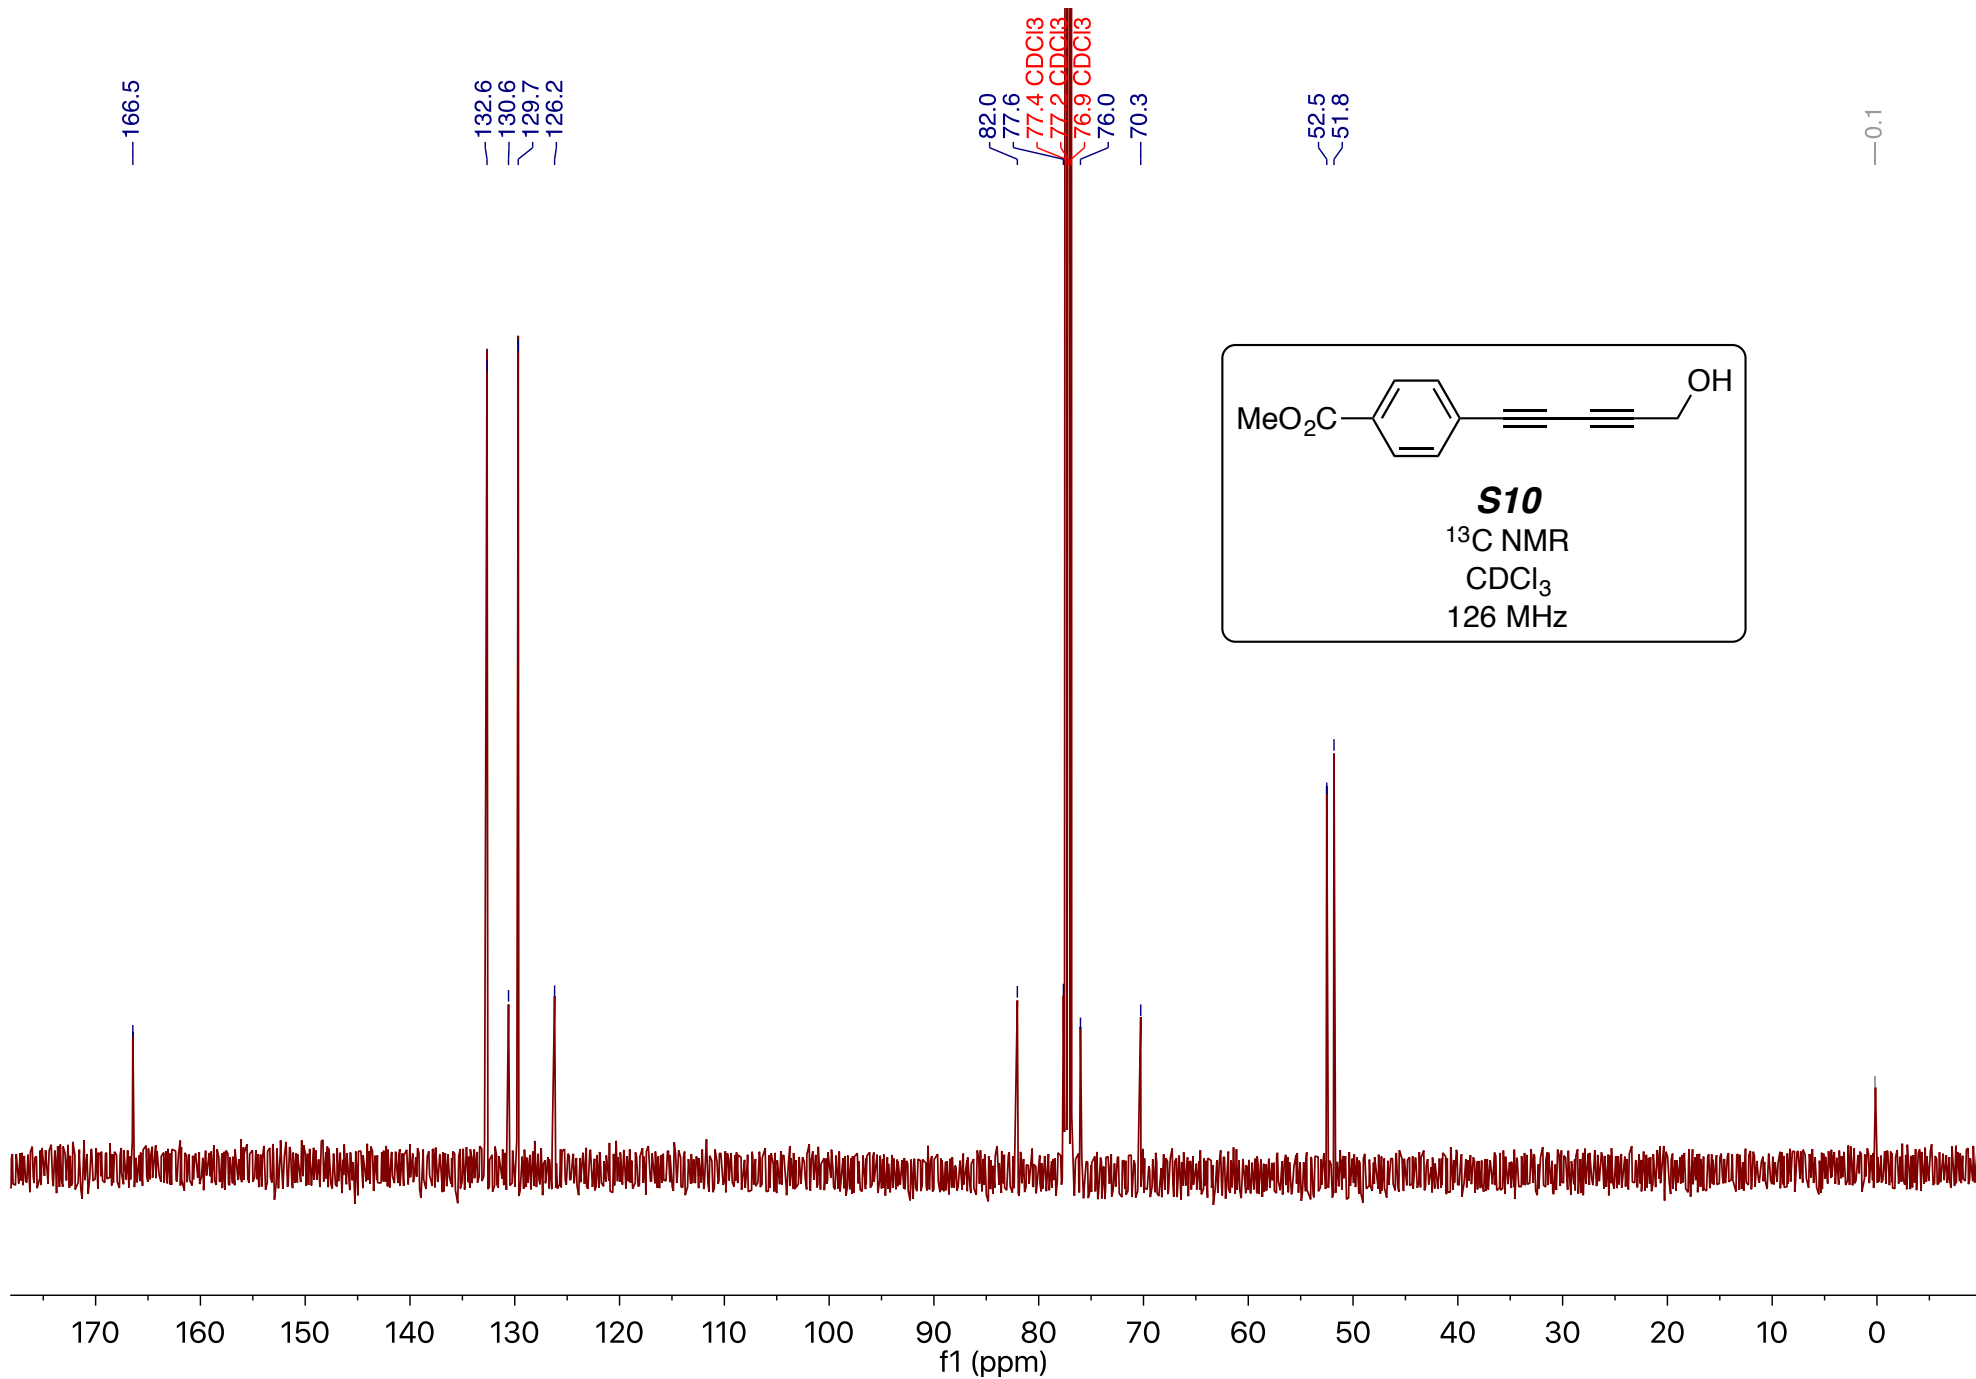

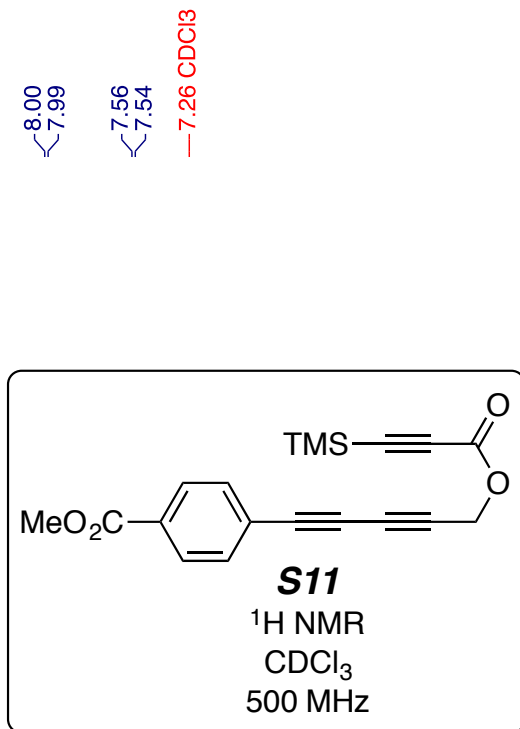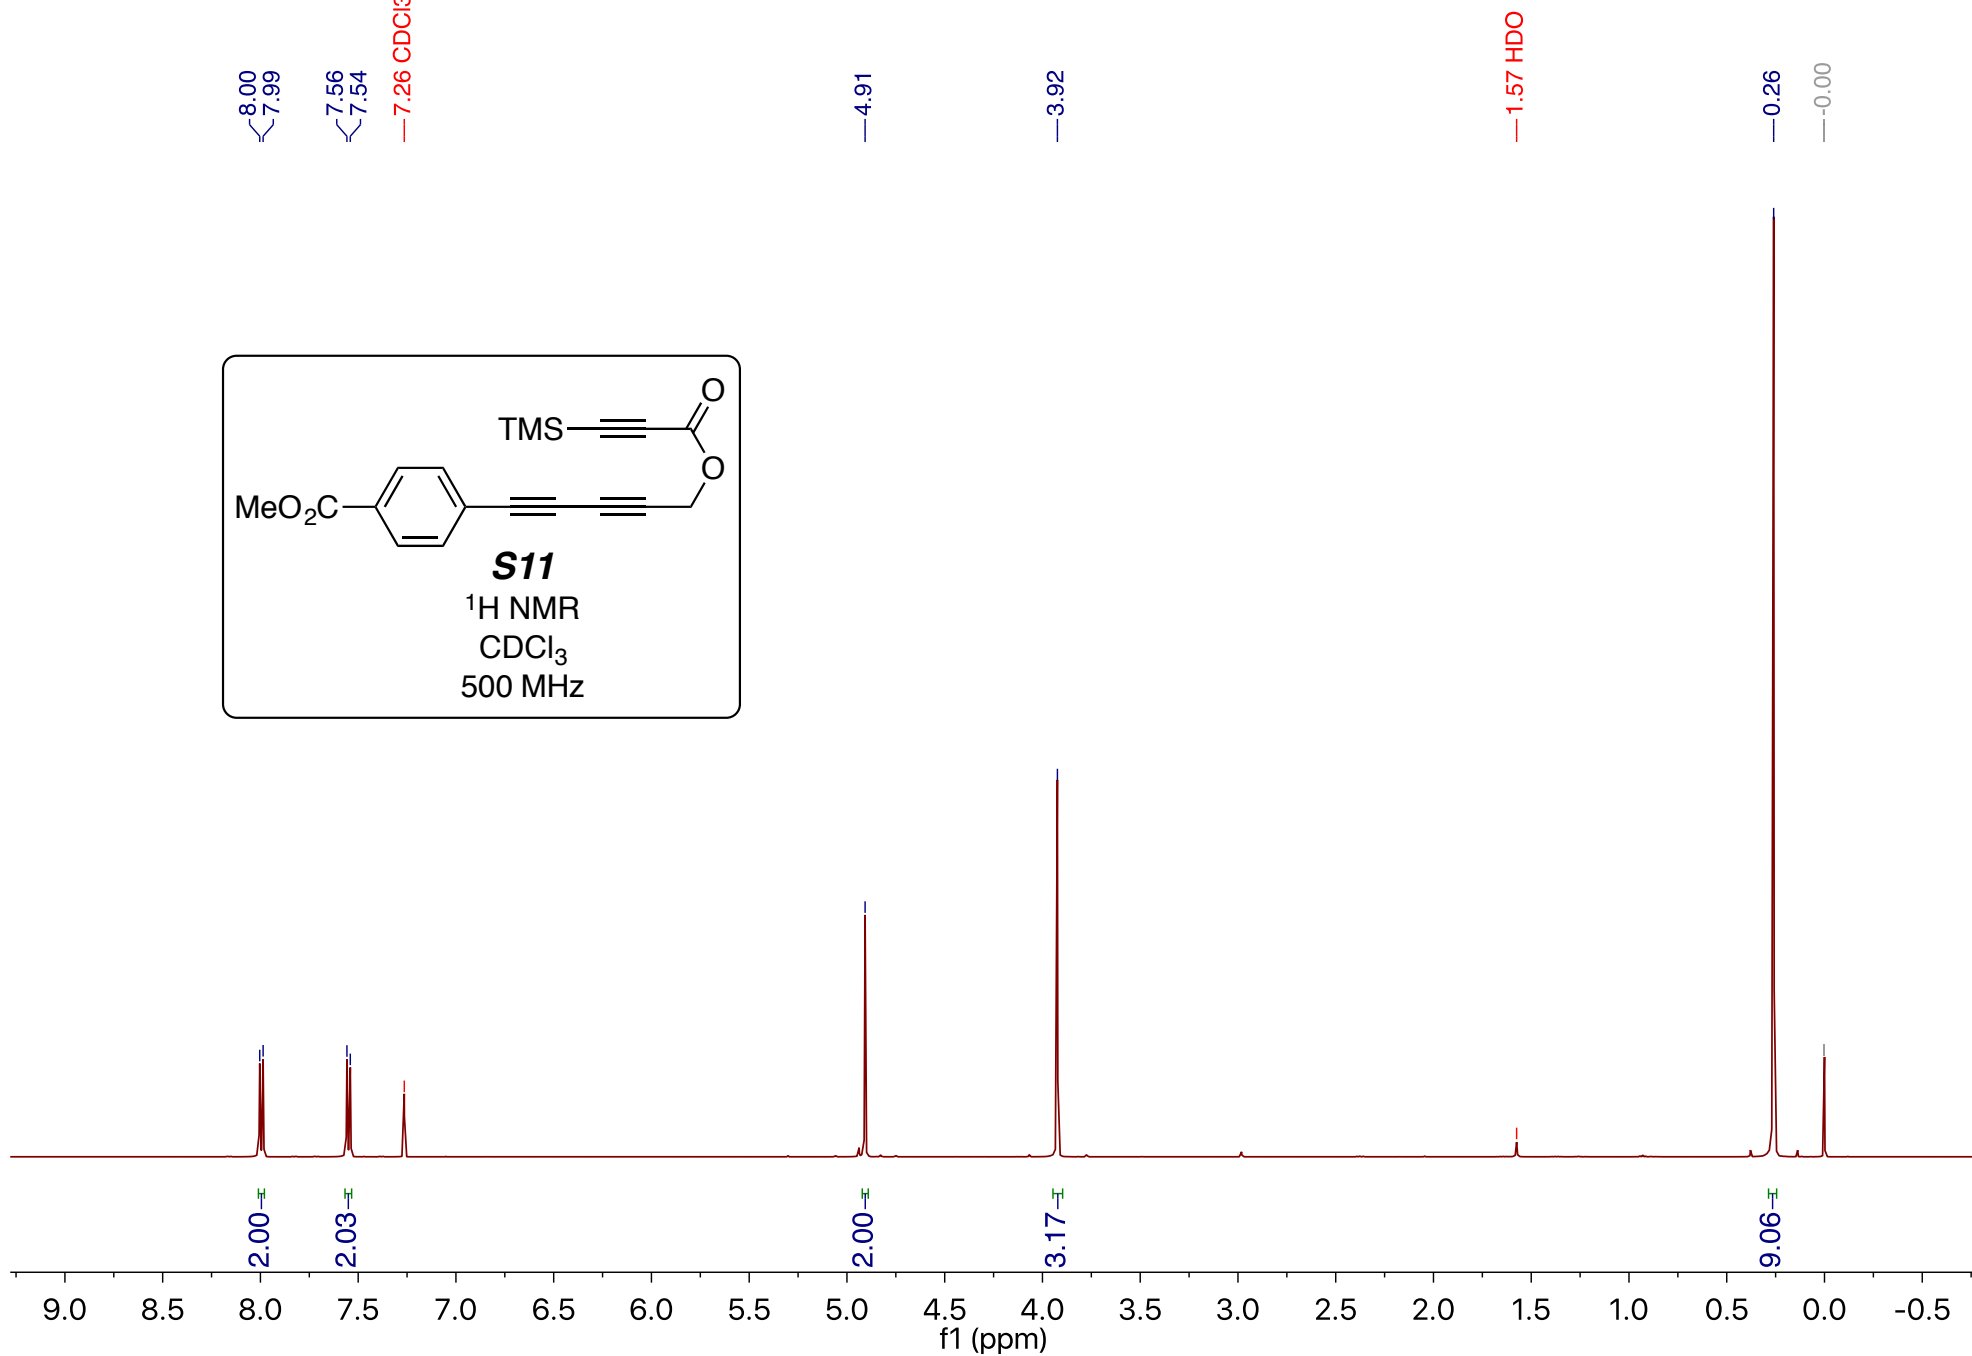



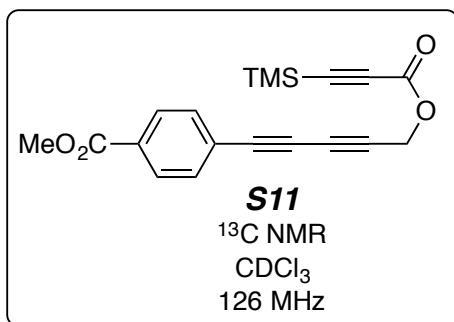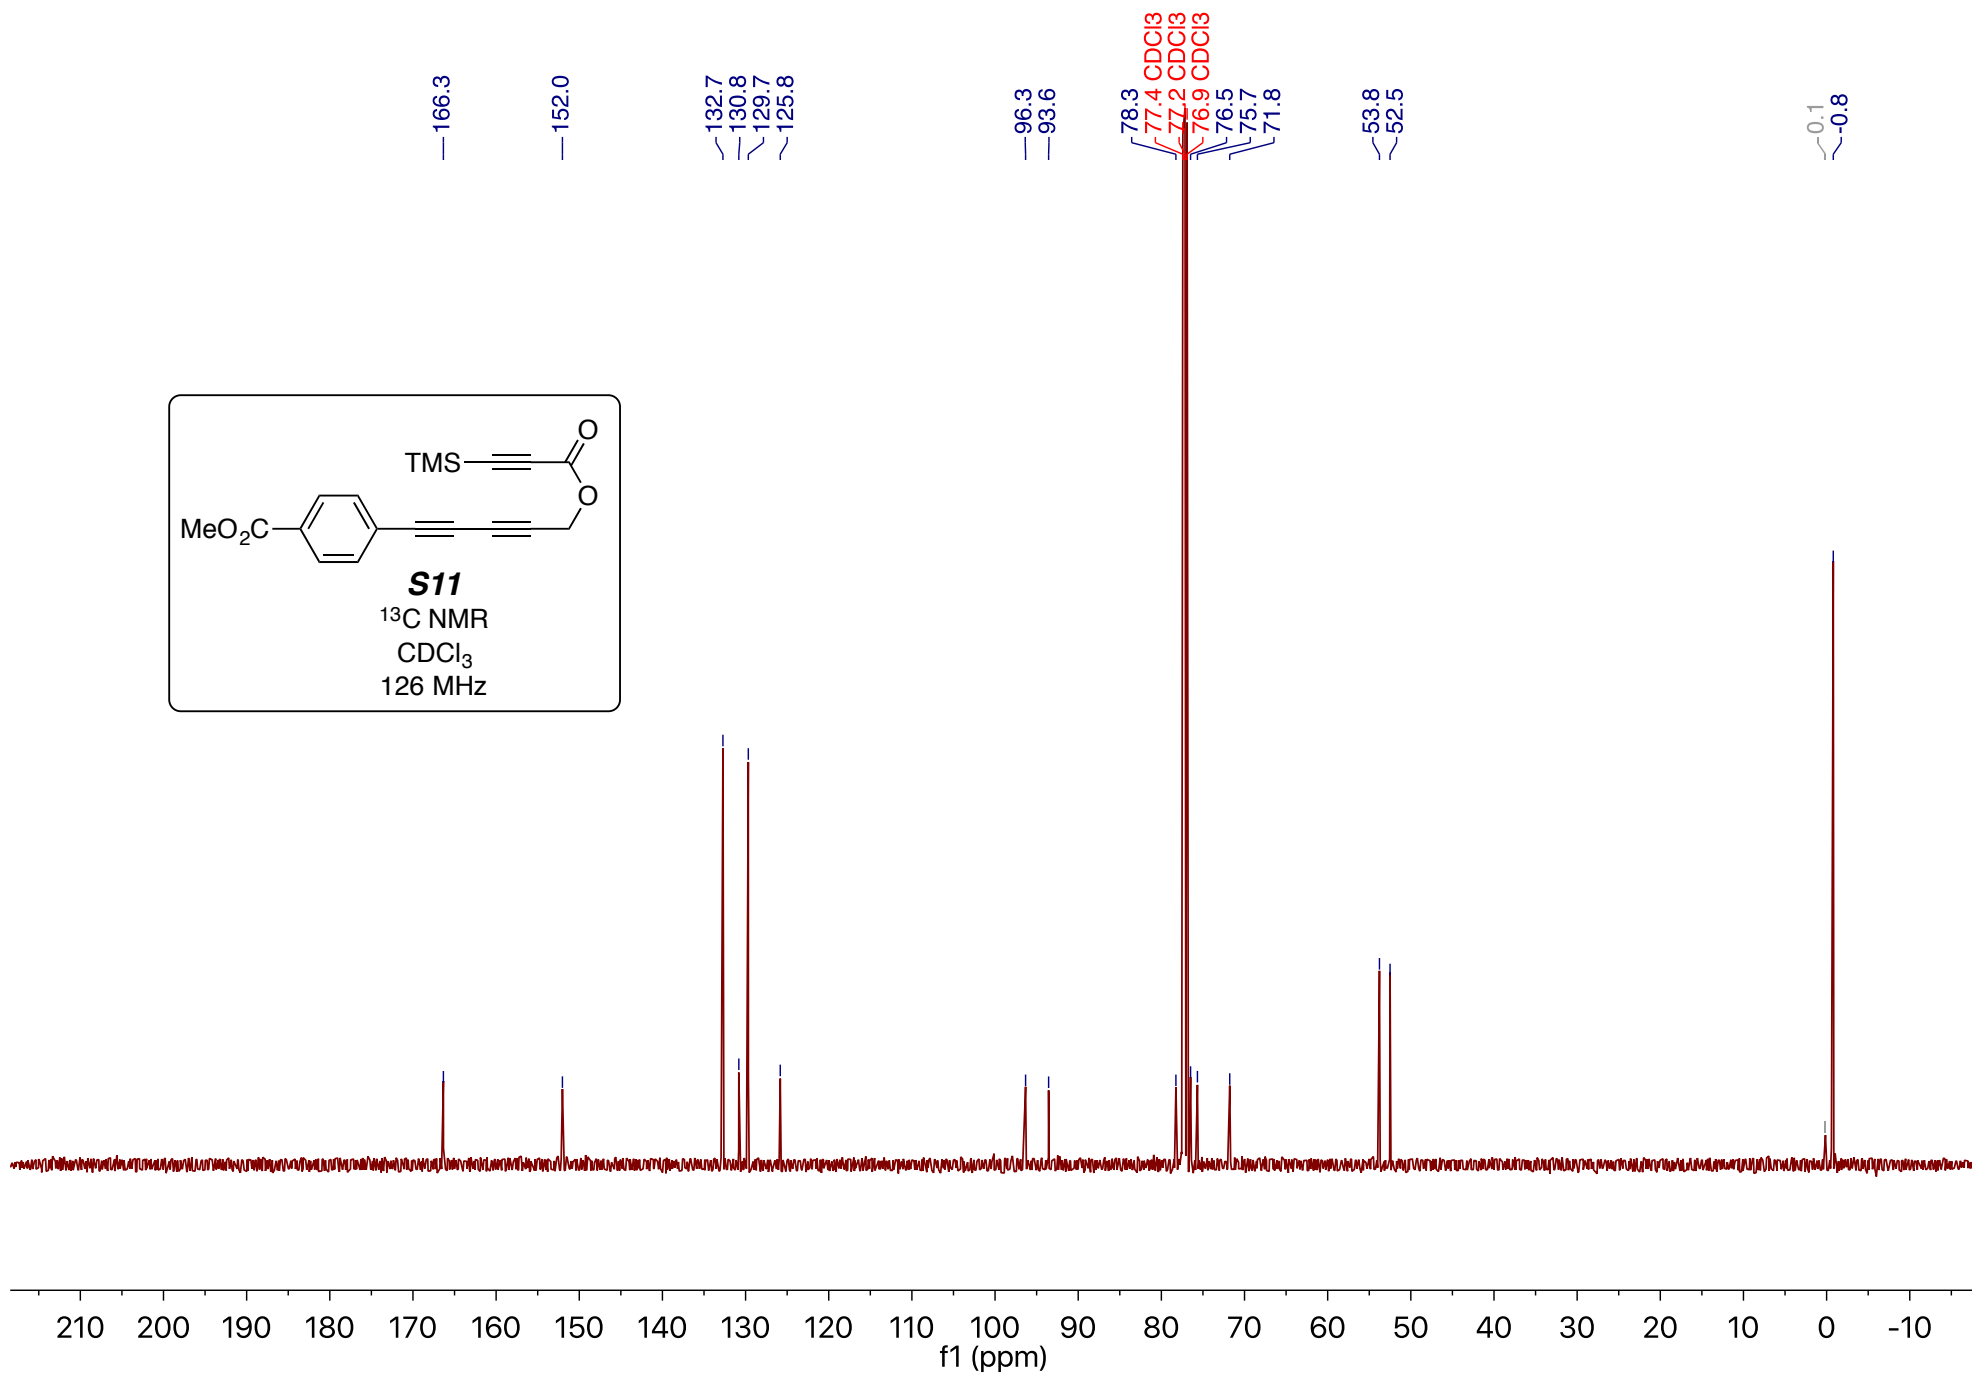

—7.47  
—7.26 CDCl<sub>3</sub>  
—7.02

—4.89

—0.25  
—-0.00

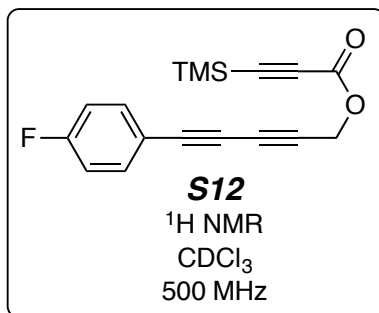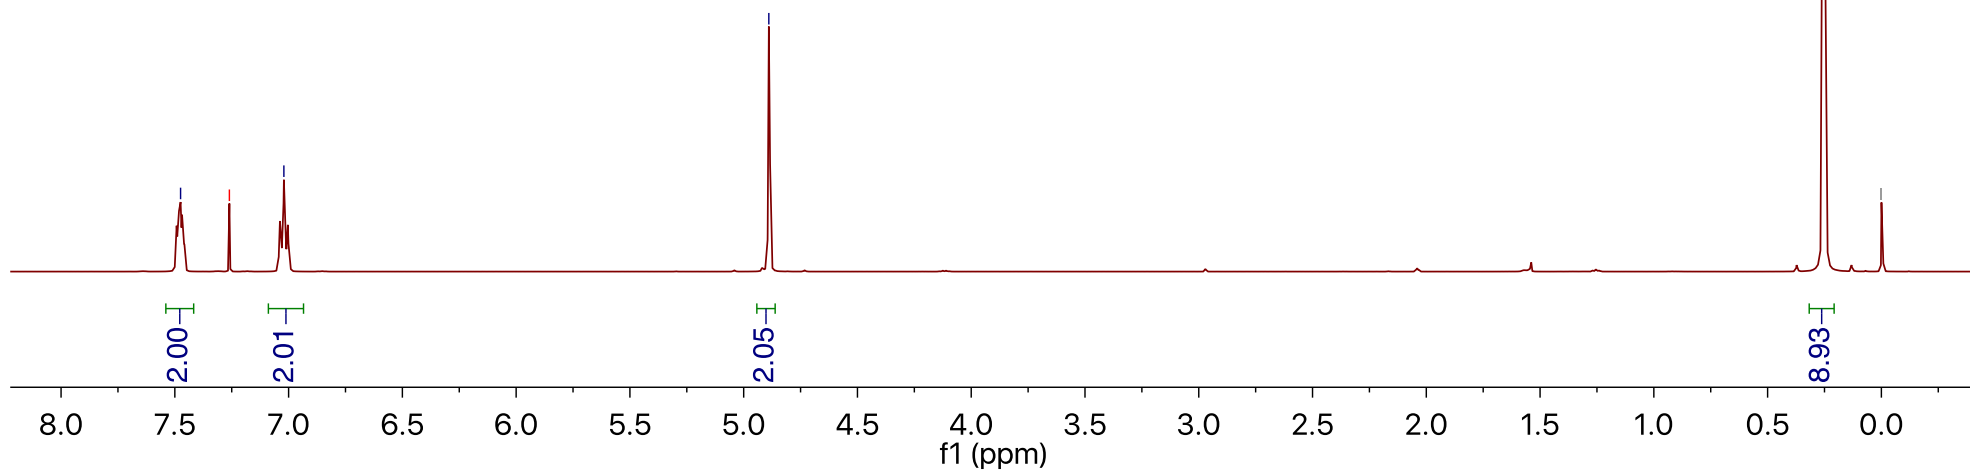

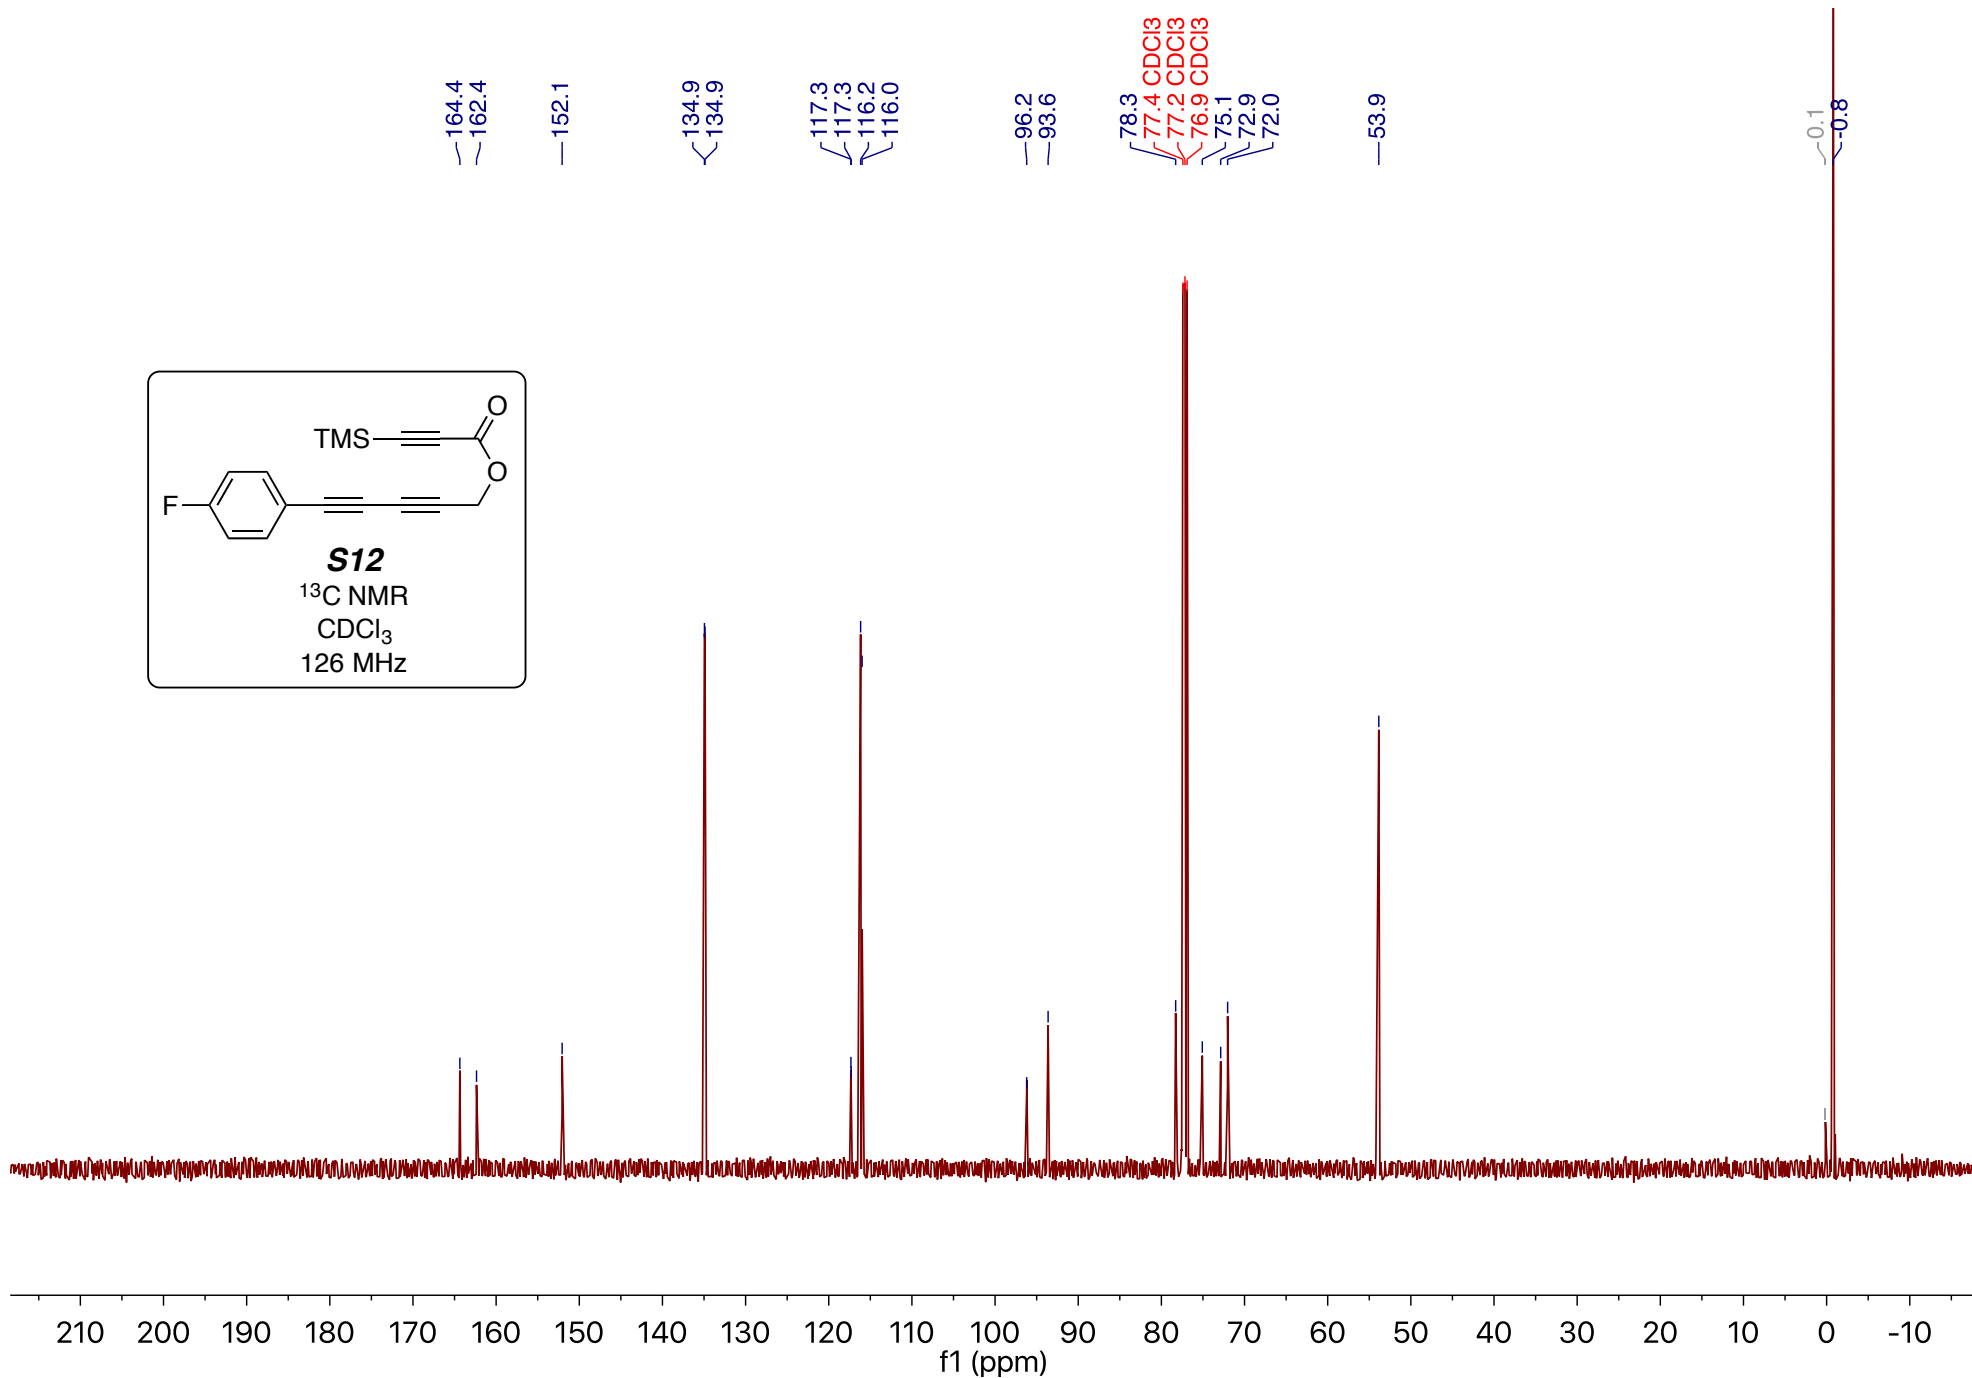

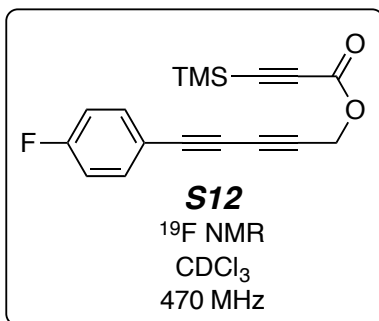

-107.9

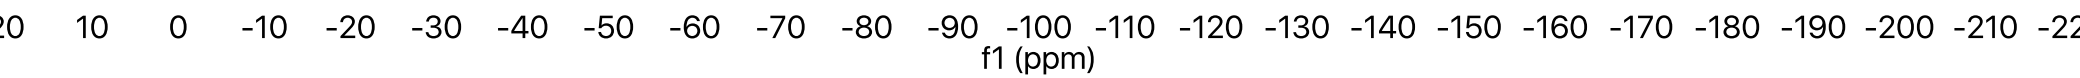

7.48  
7.46  
7.35  
7.34  
7.26 CDCl<sub>3</sub>

4.89

0.26

0.00

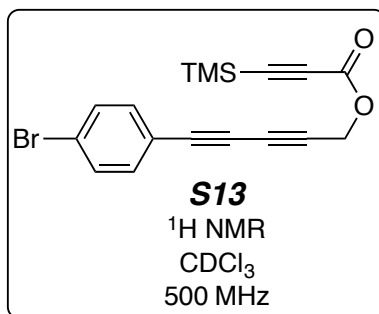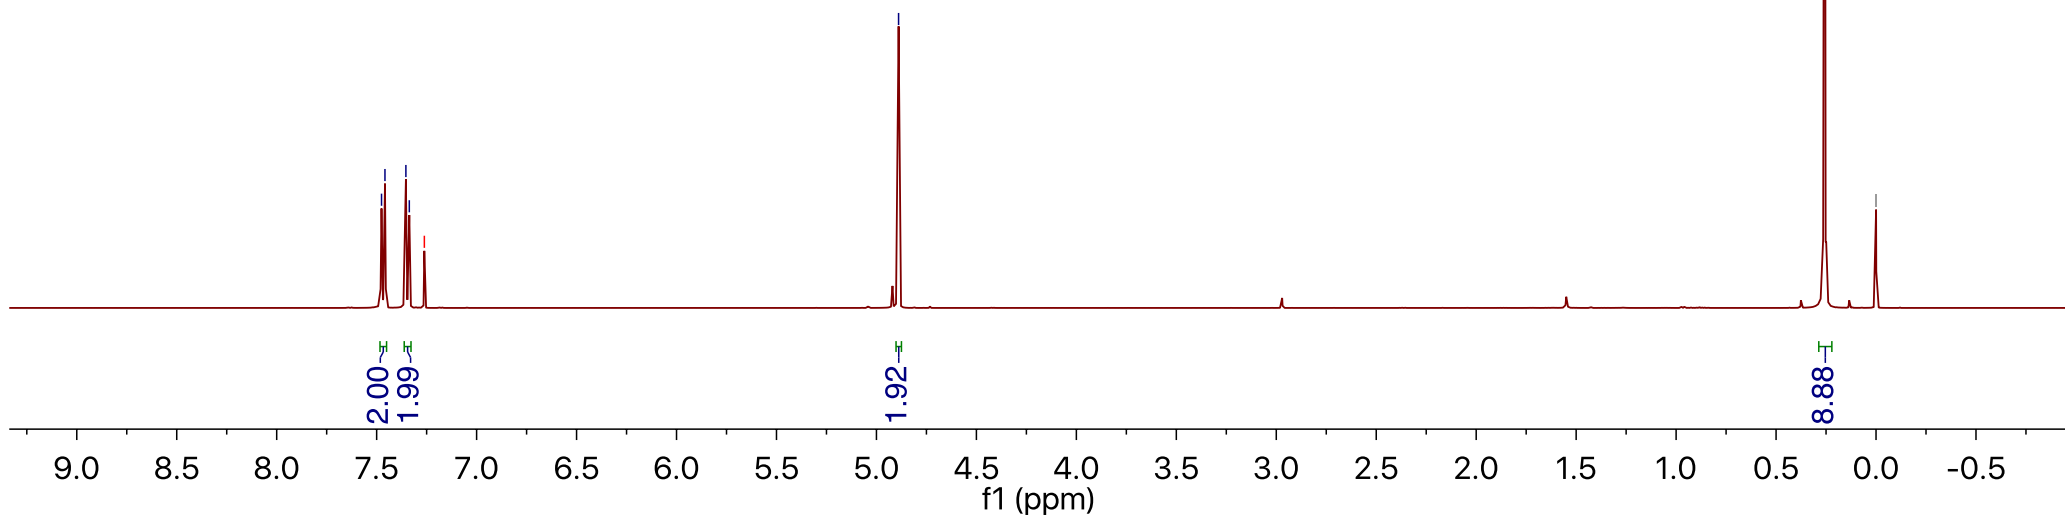

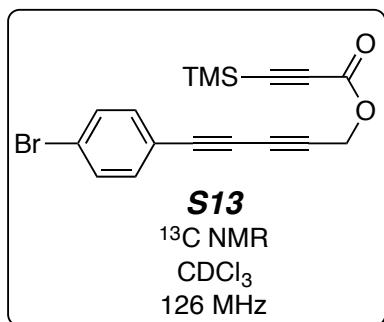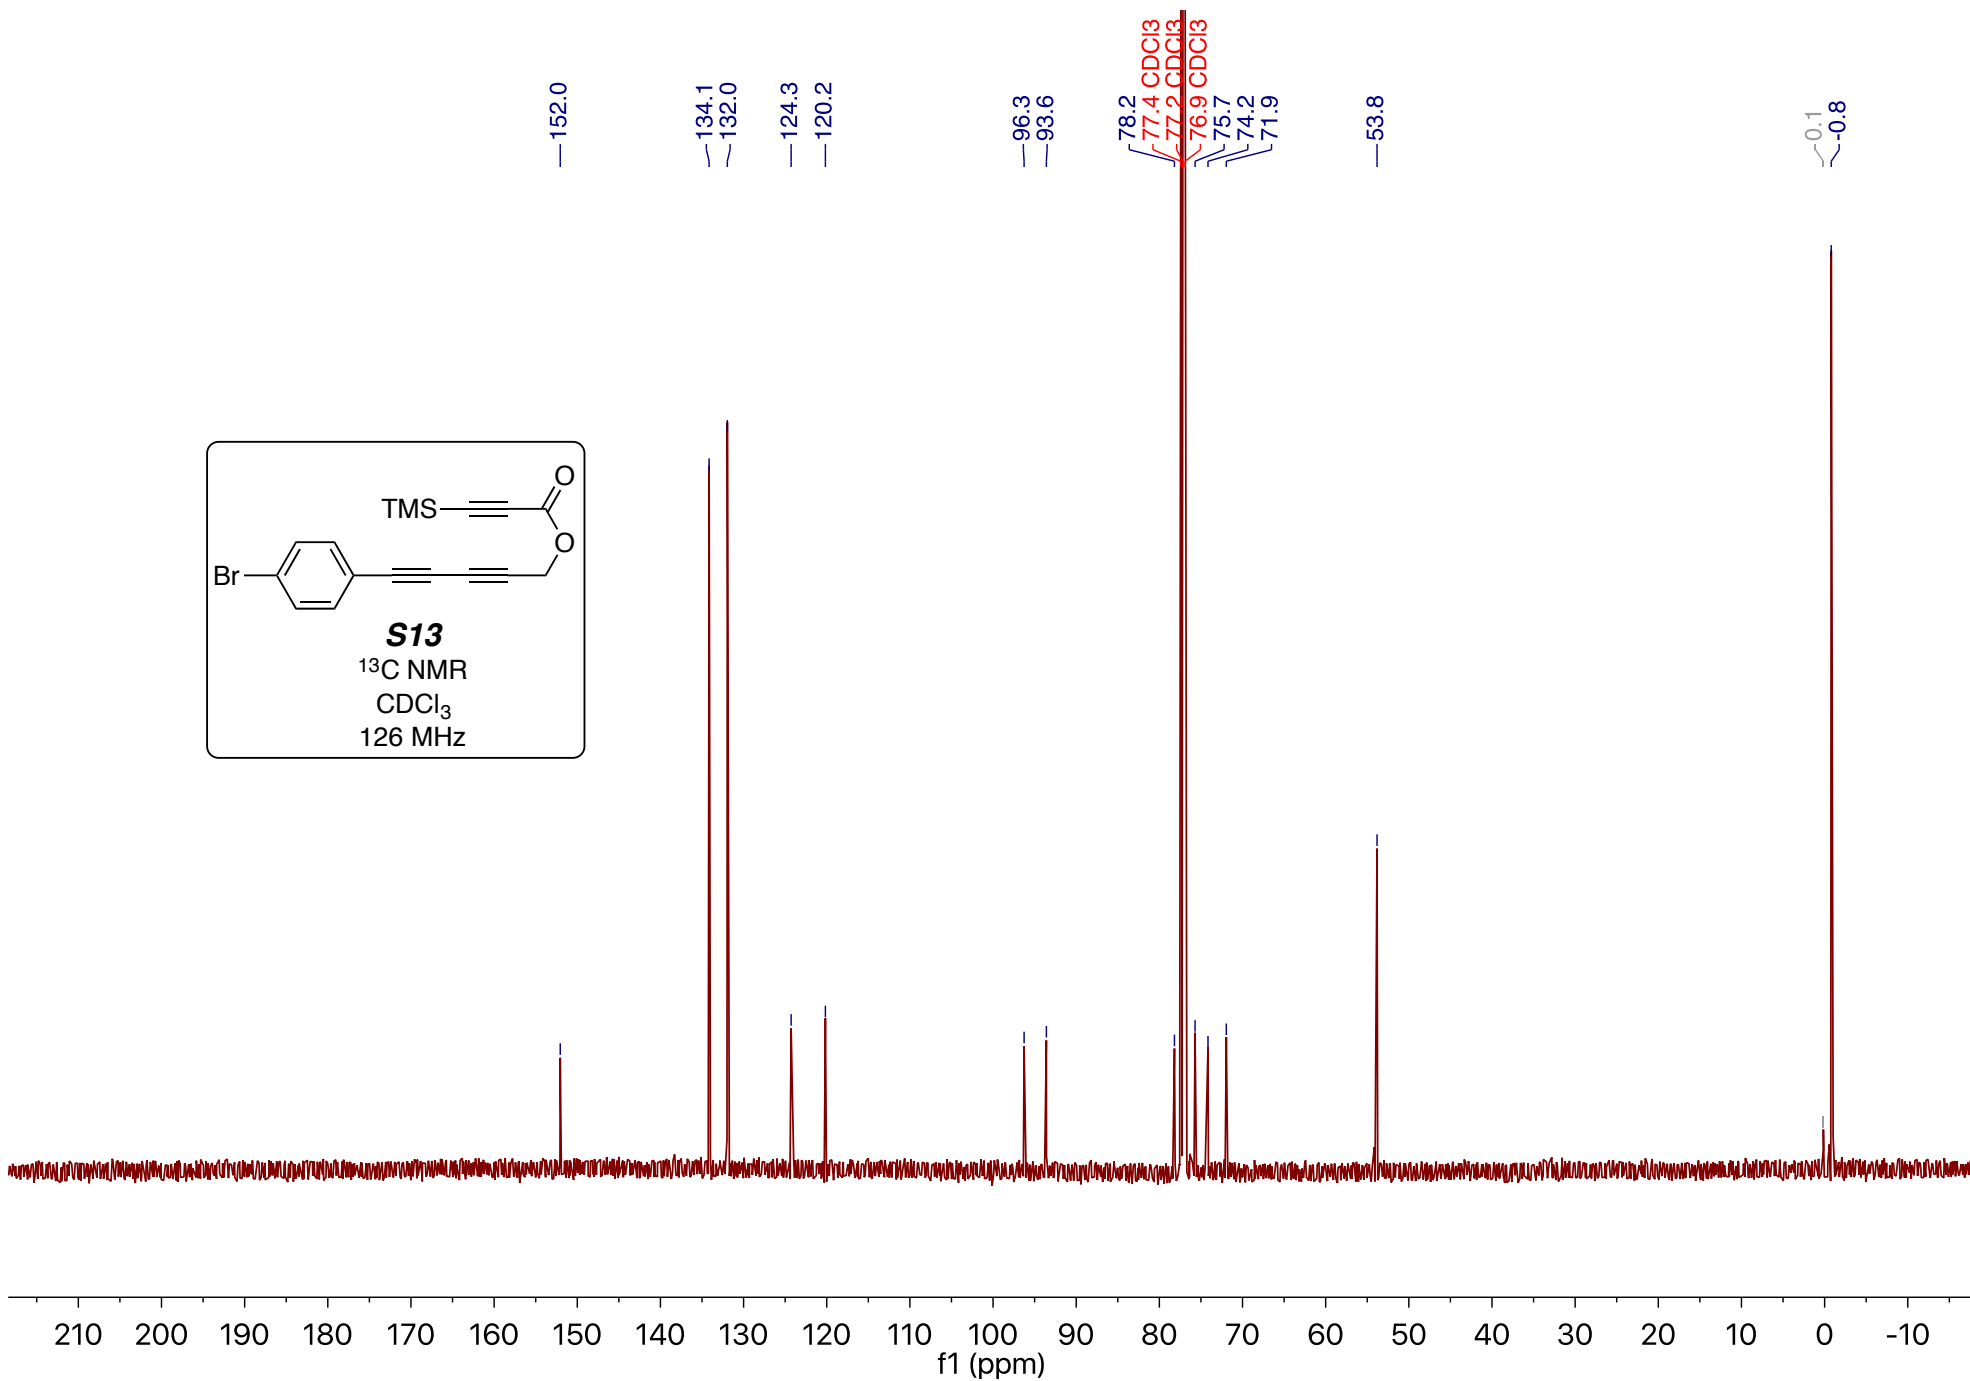

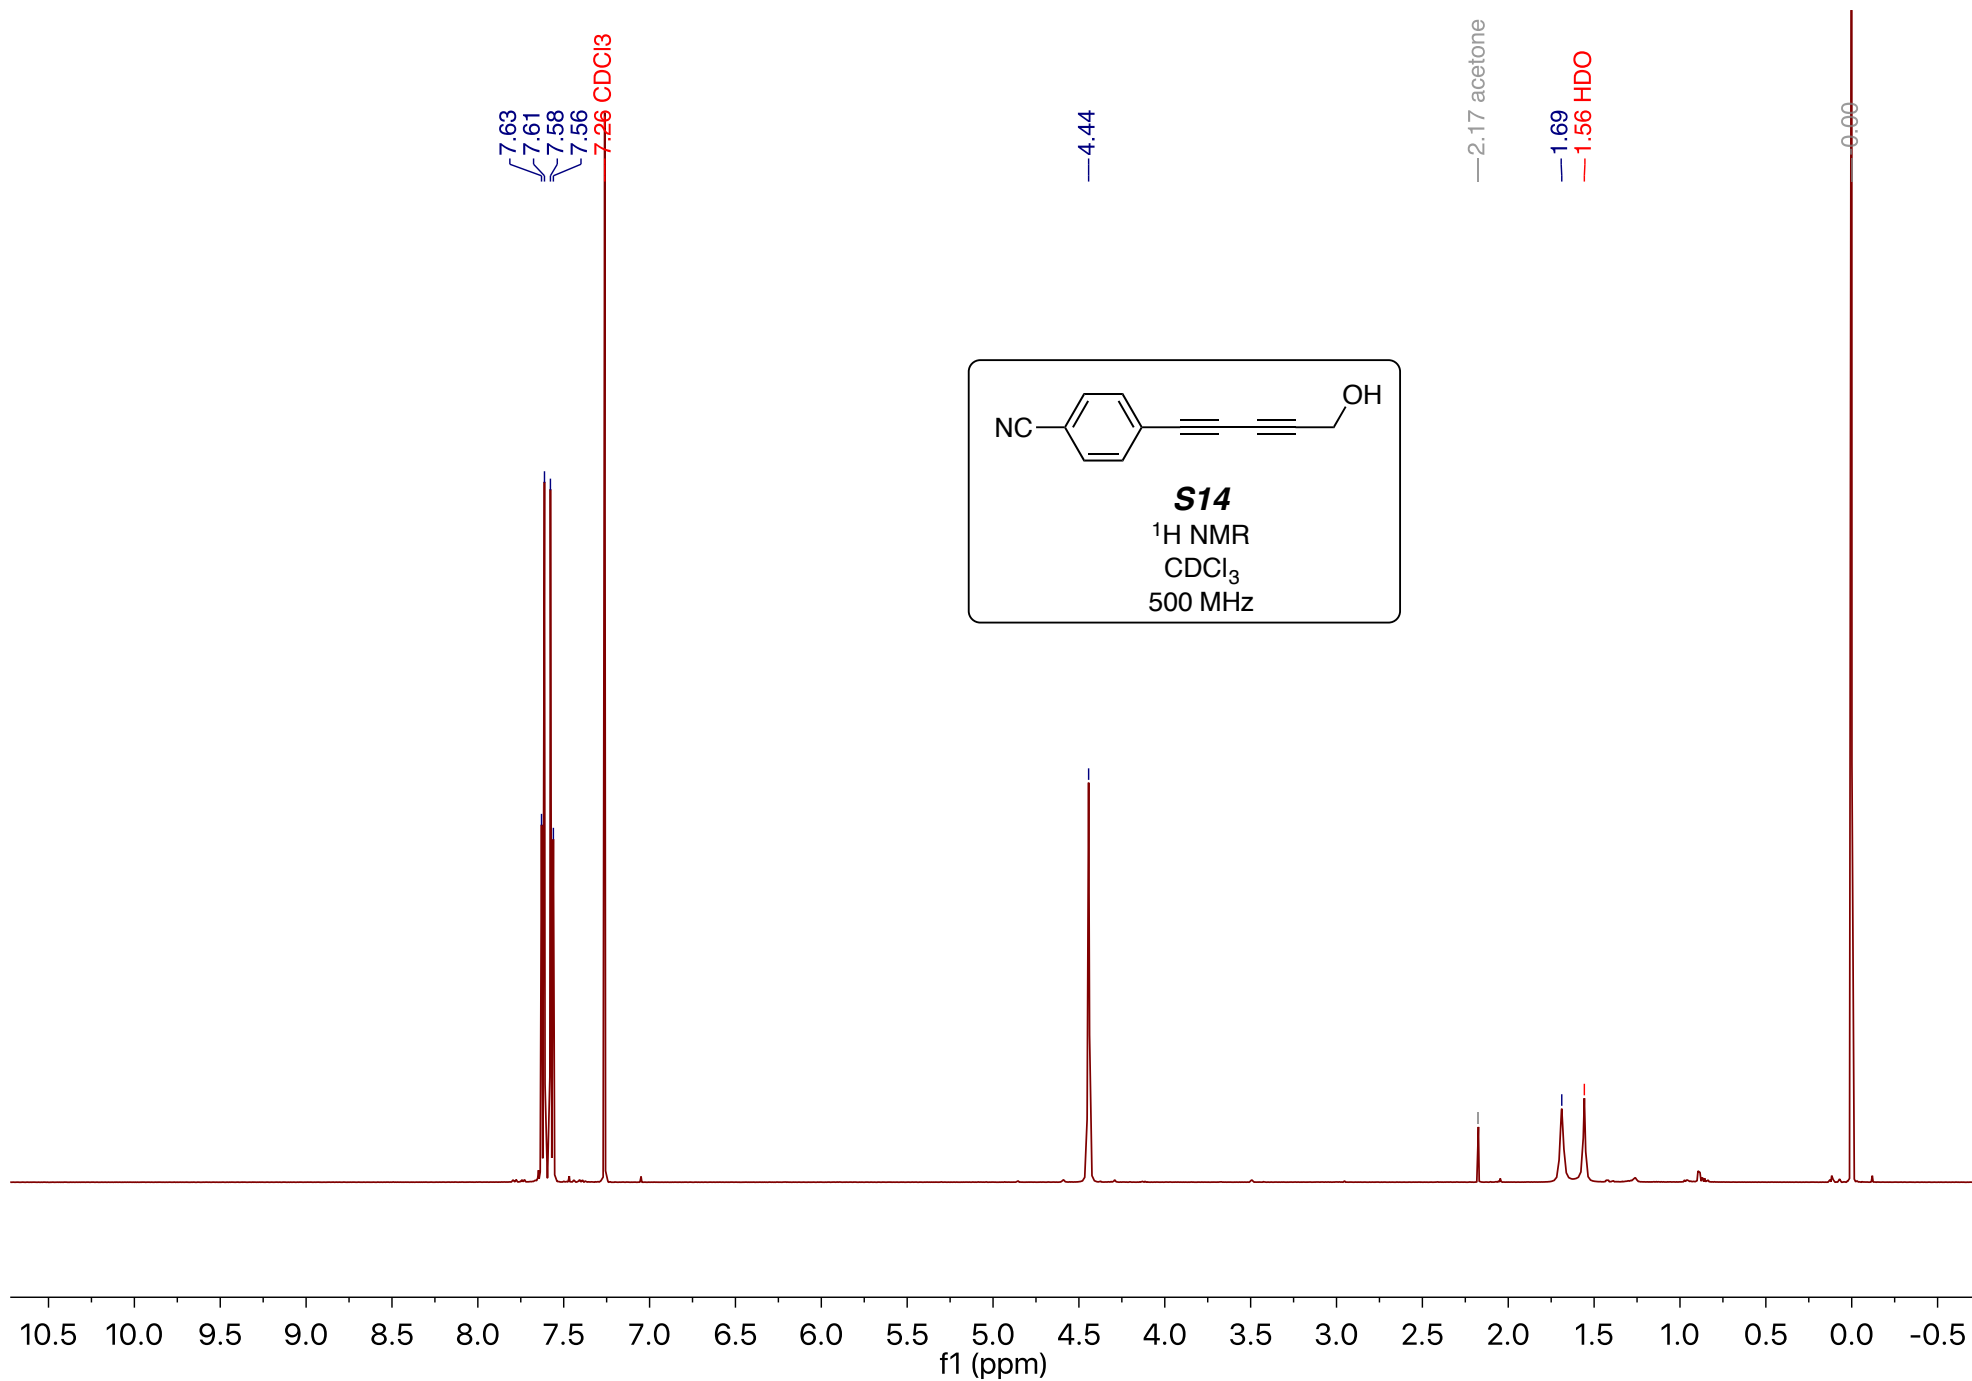

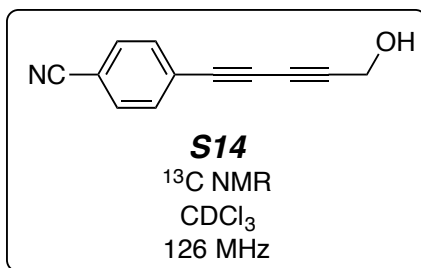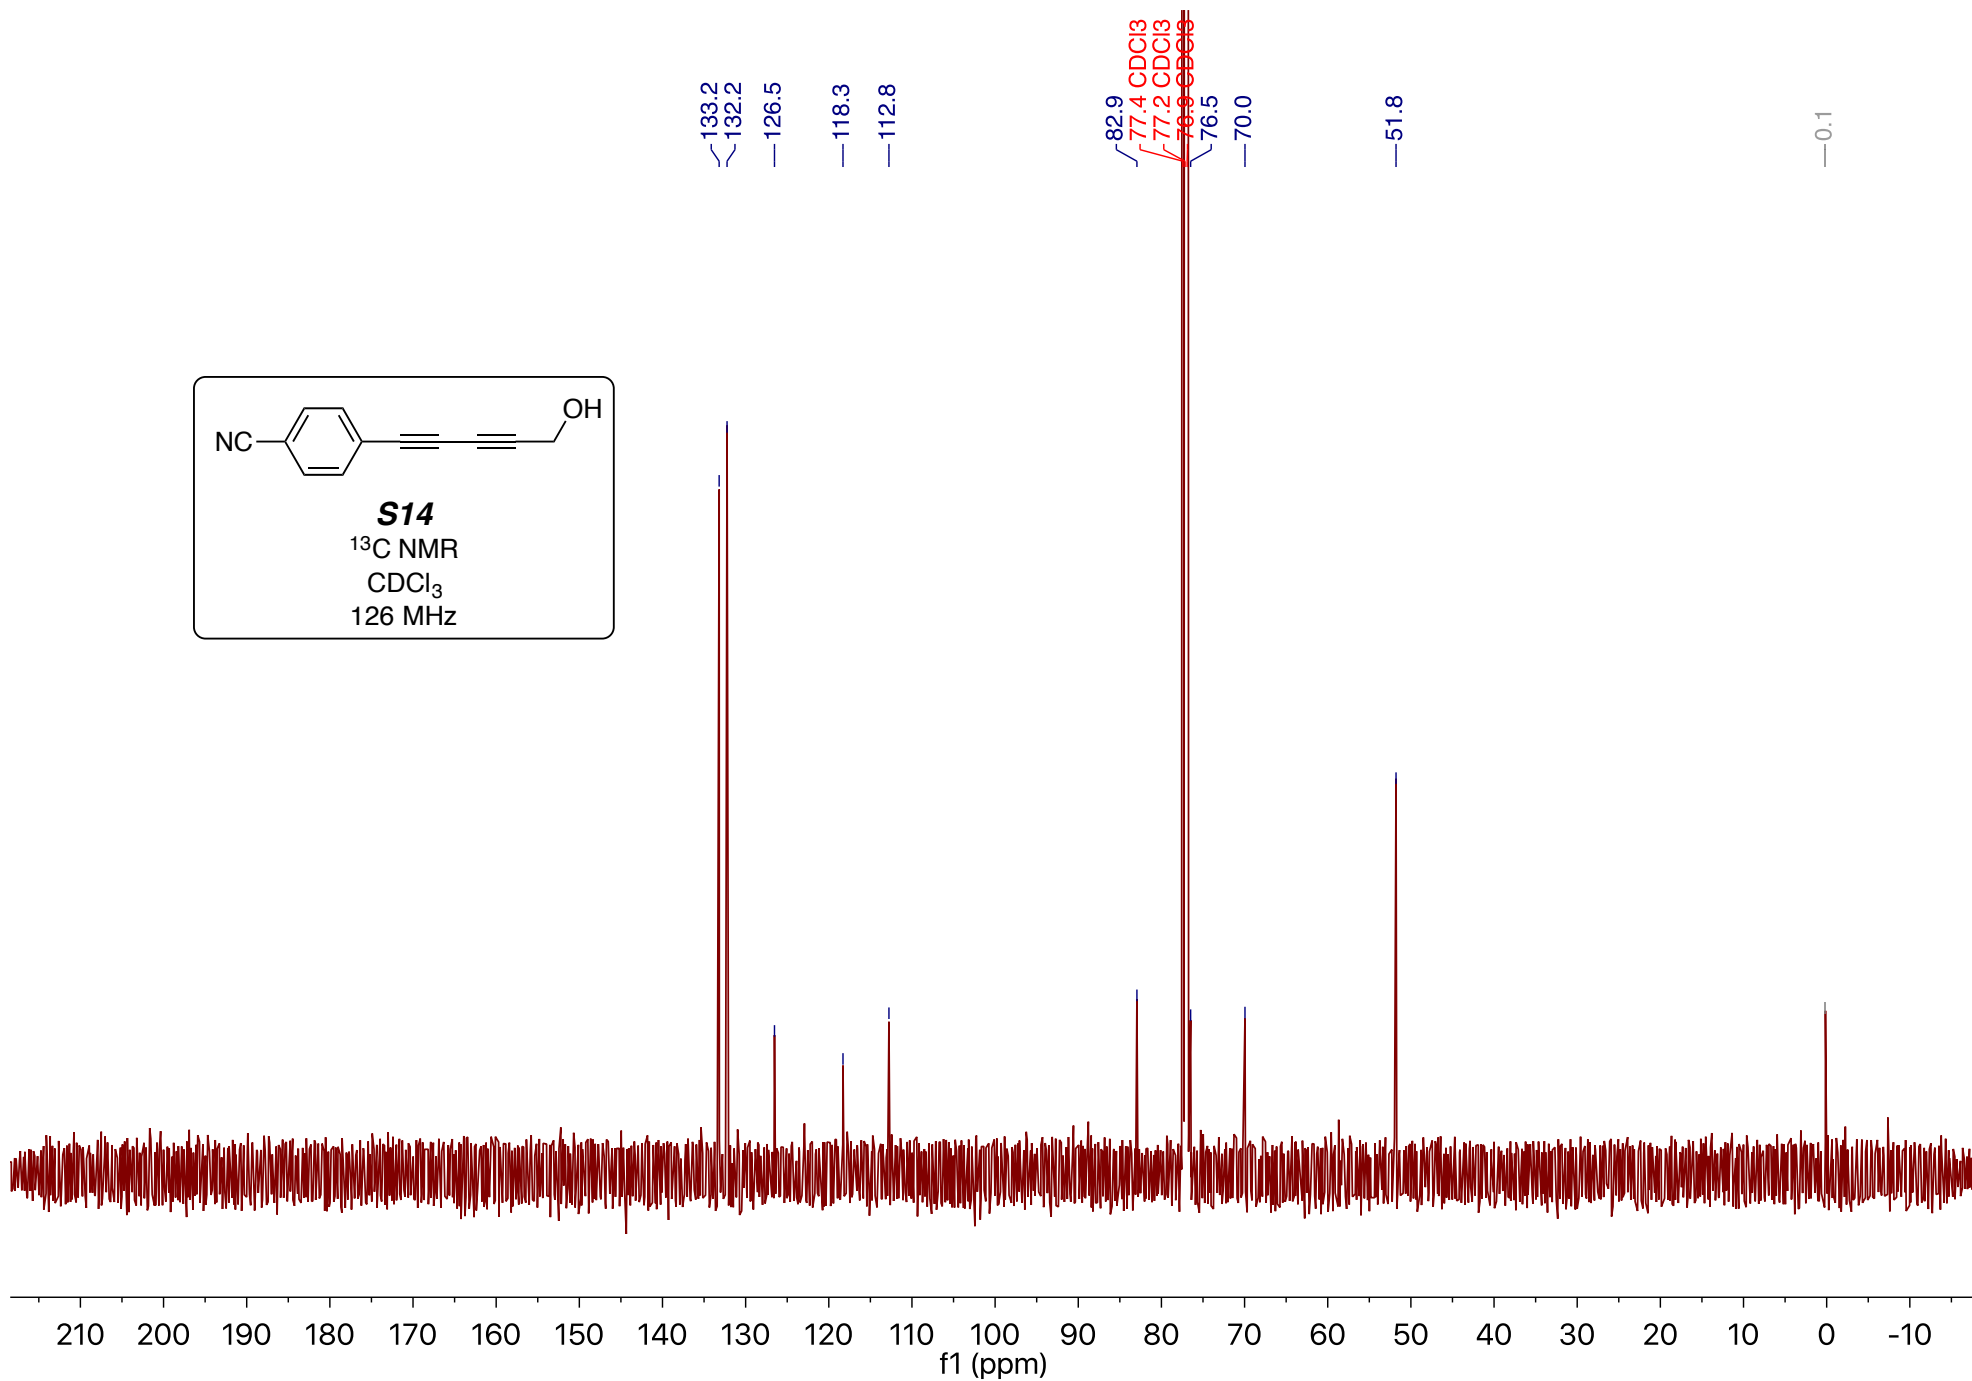



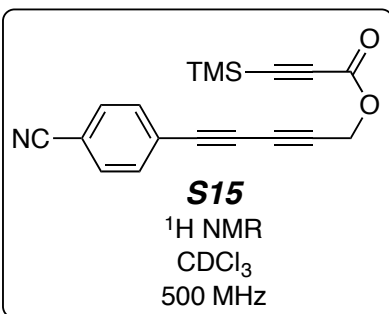

7.63  
7.62  
7.58  
7.56  
— 7.27  $\text{CDCl}_3$

— 4.91

— 0.26  
— 0.00

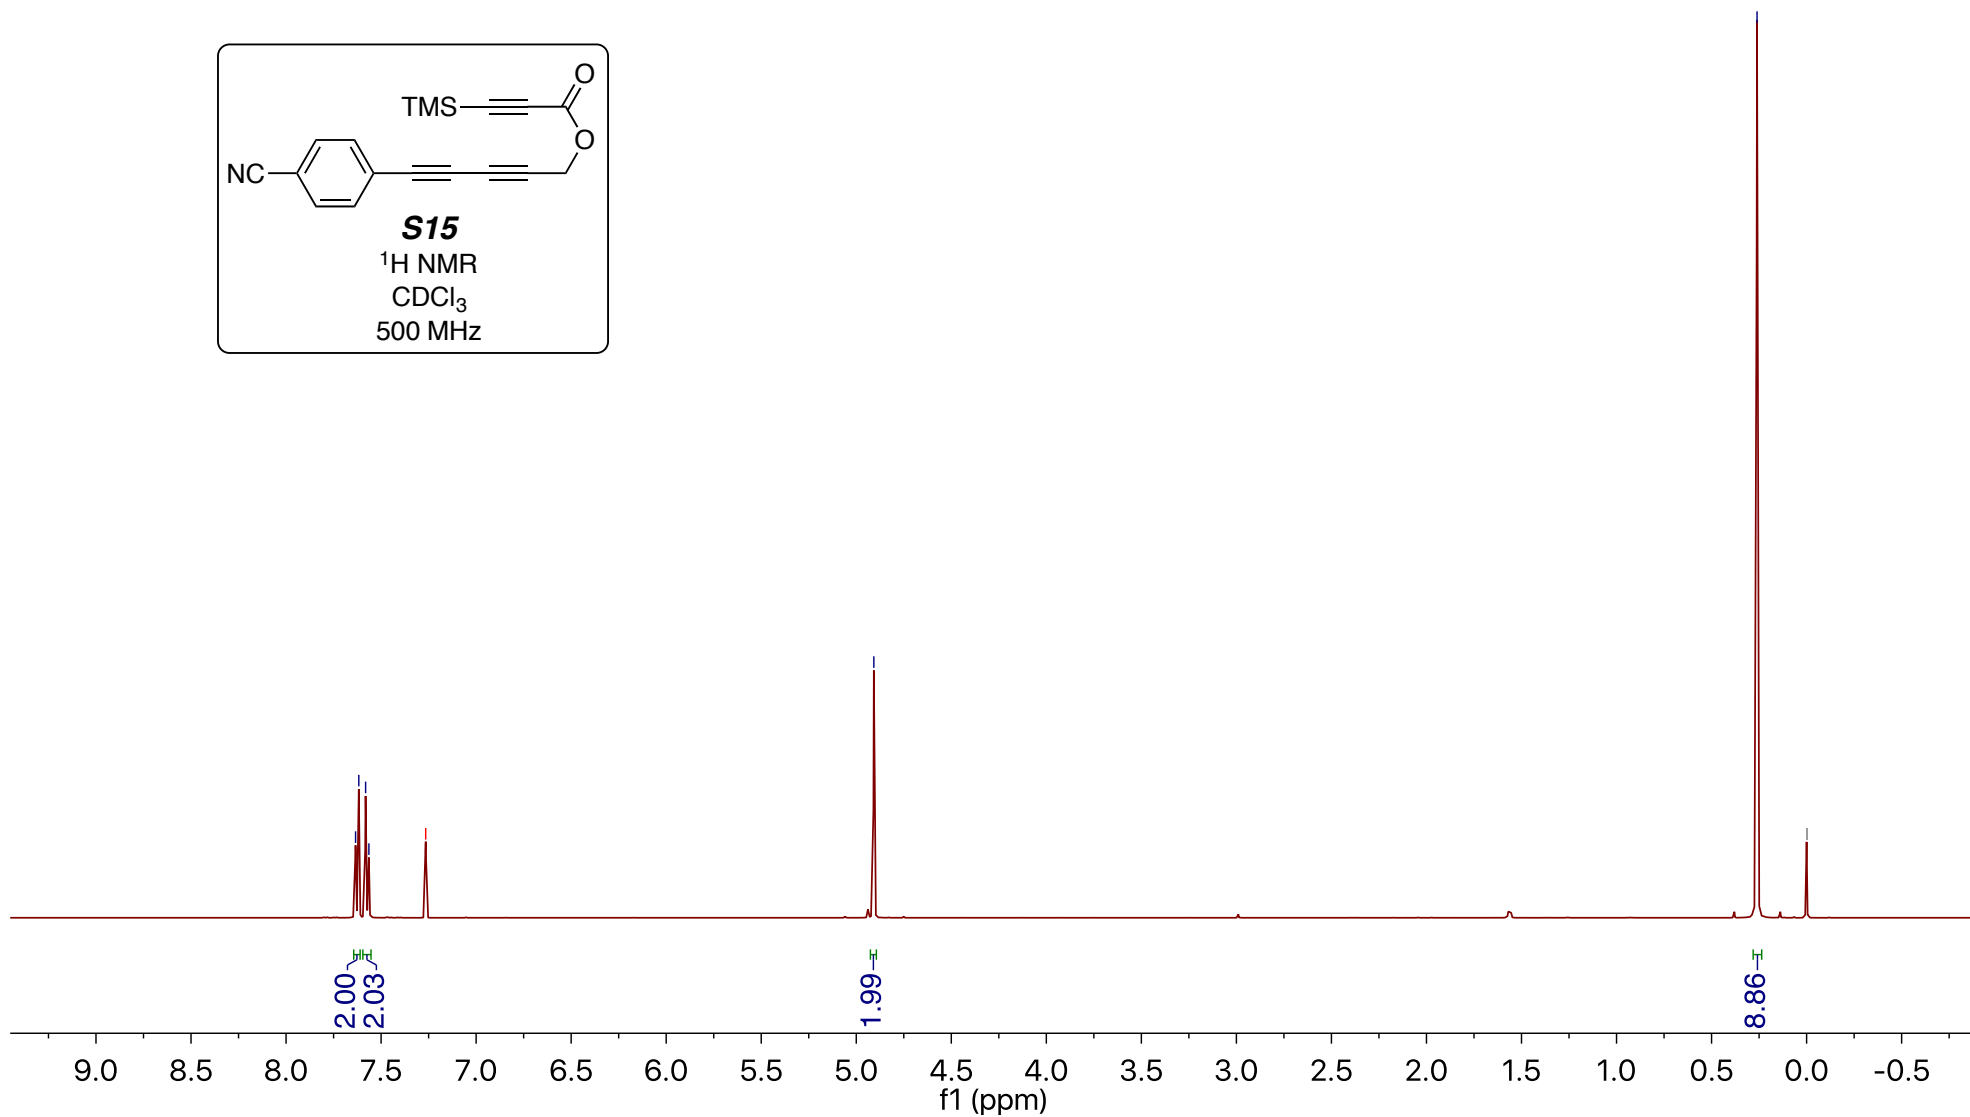

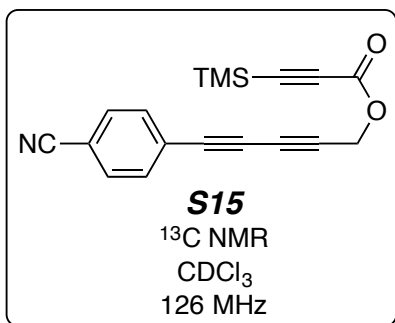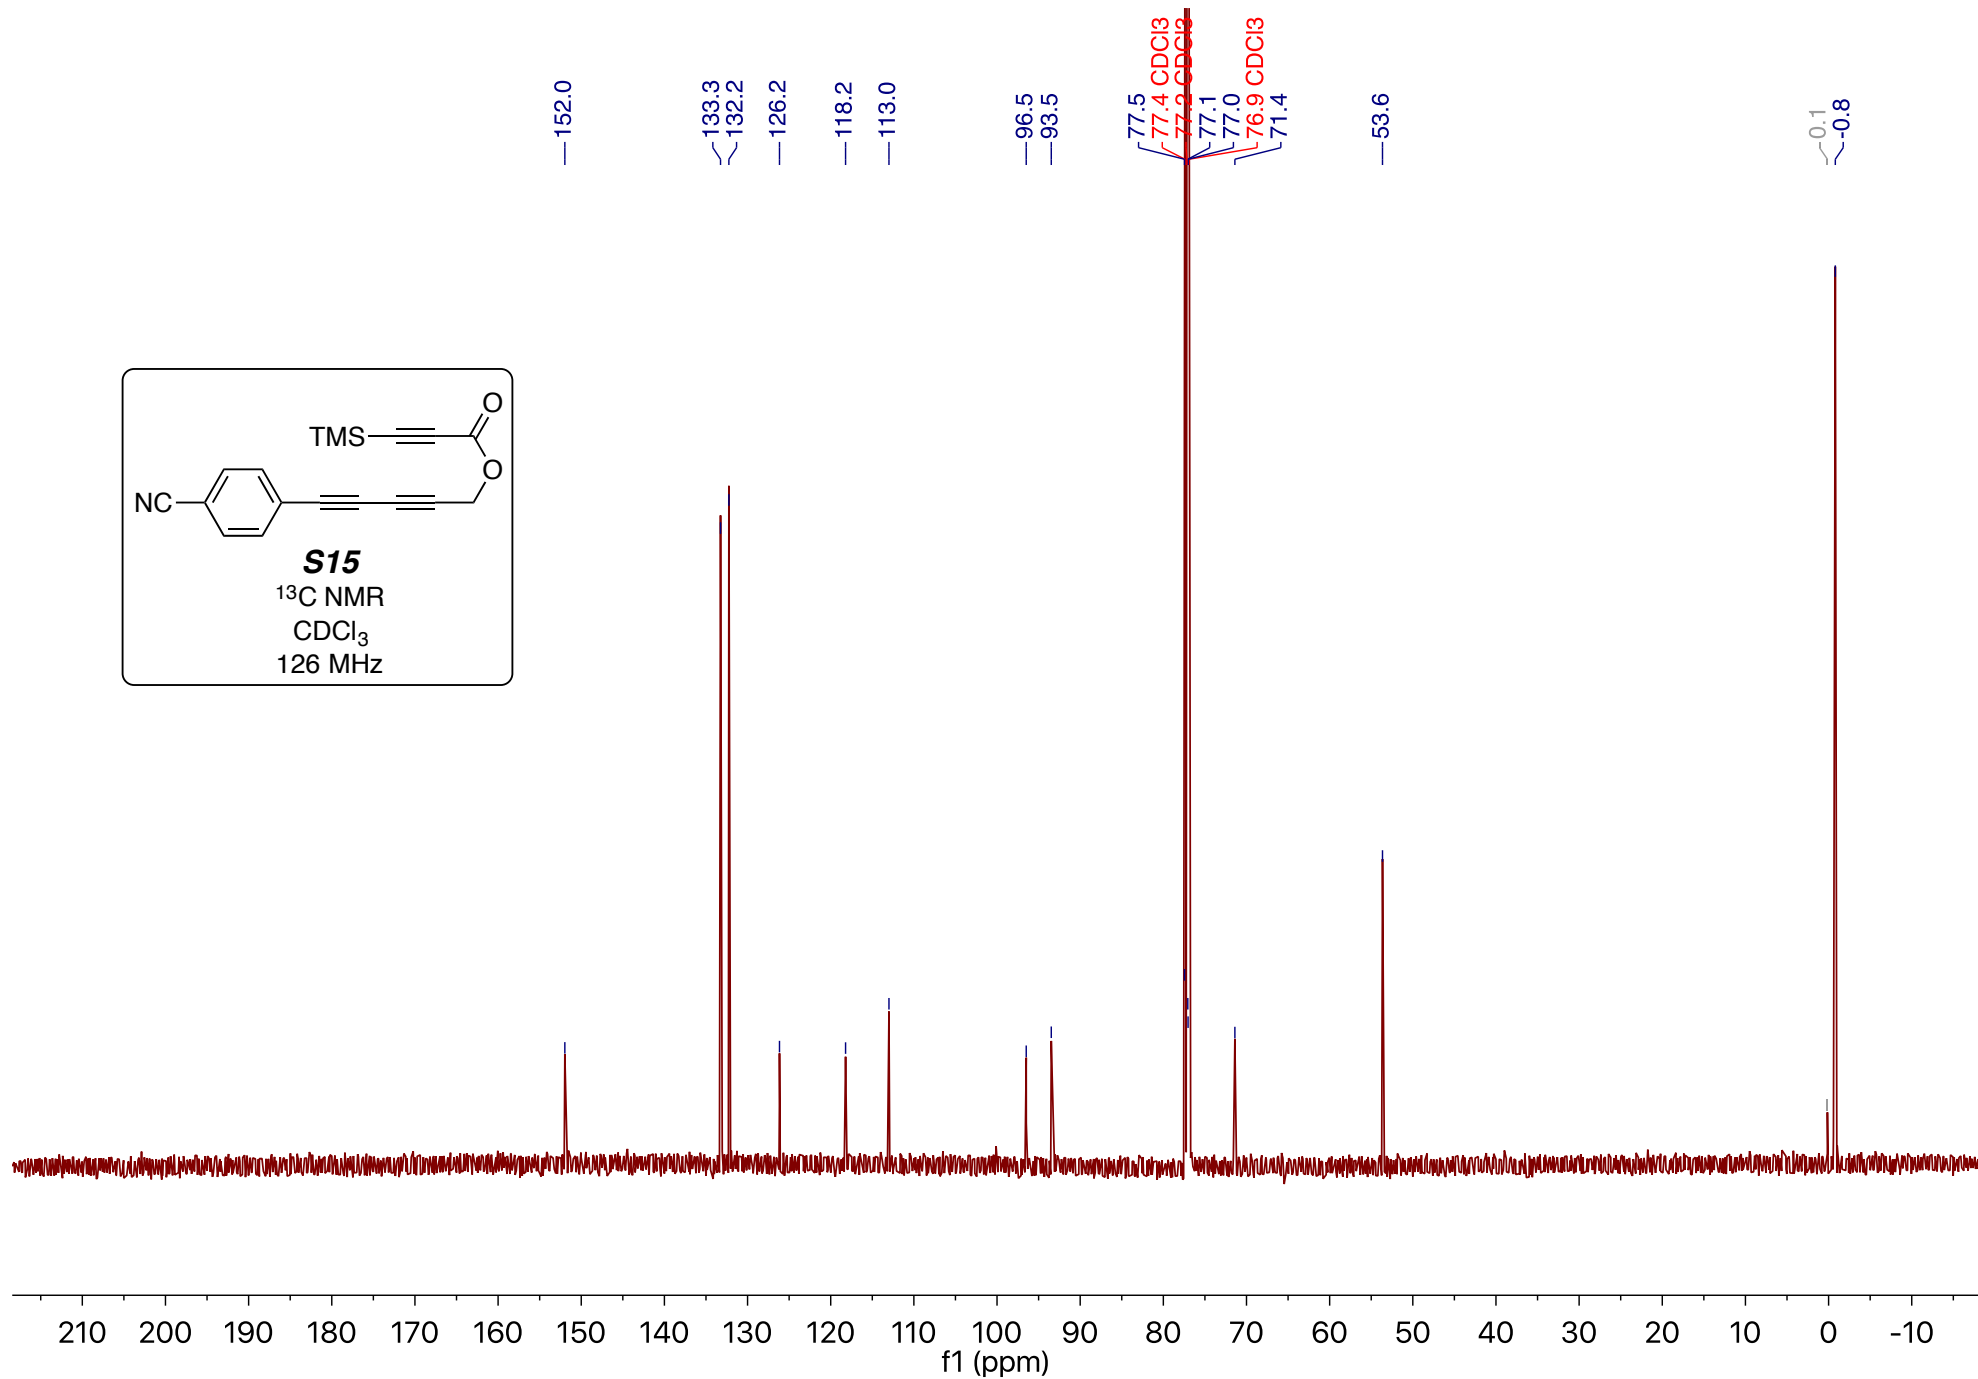

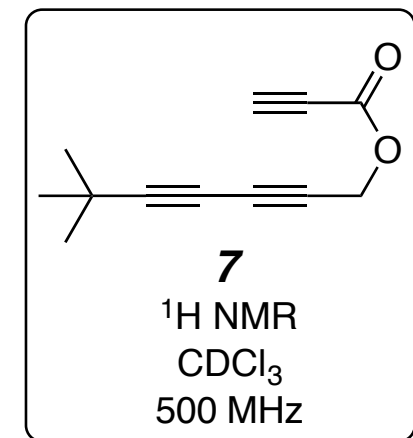-7.27  $\text{CDCl}_3$ 

-4.83

-2.94

-1.25

-0.00

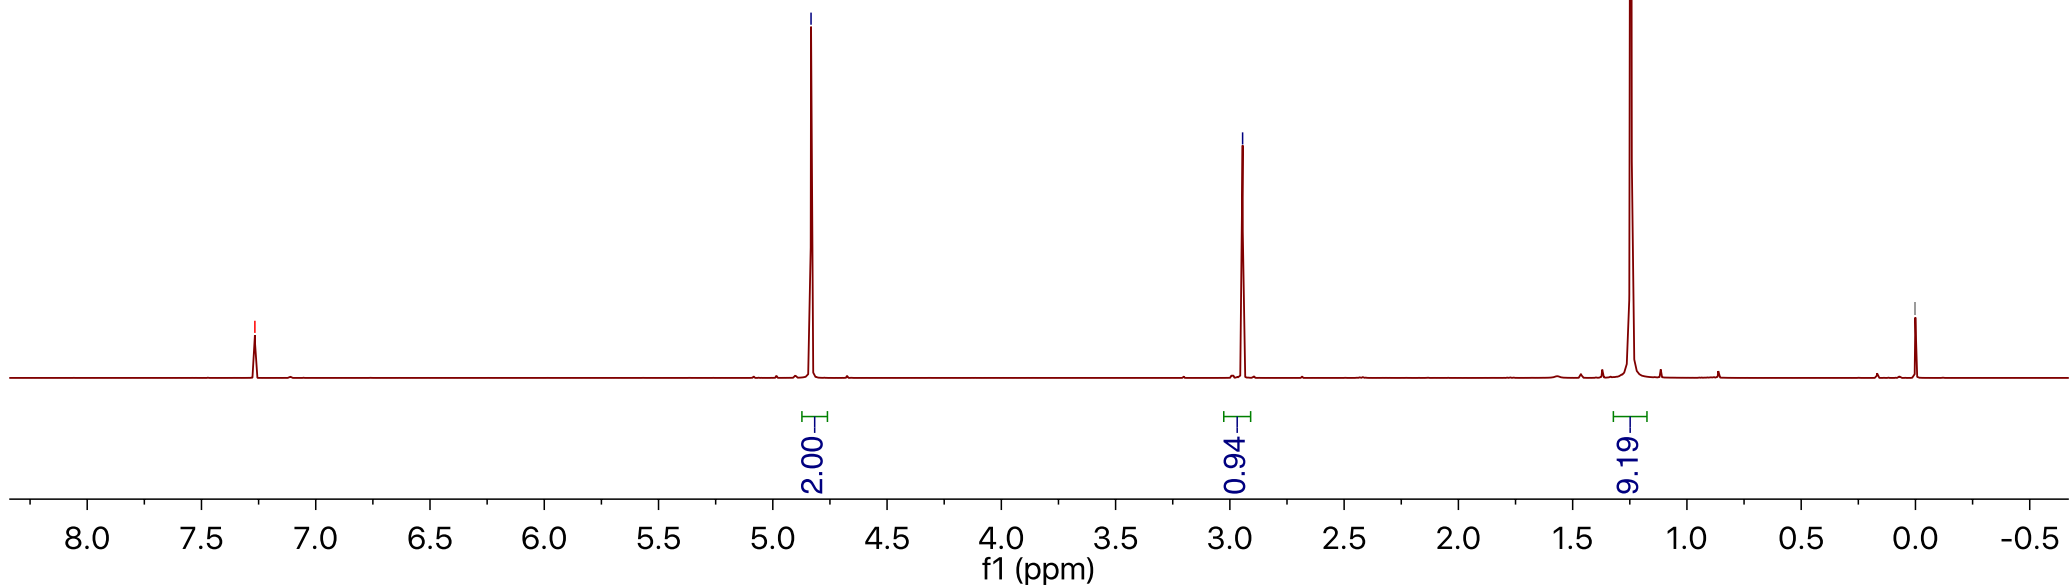

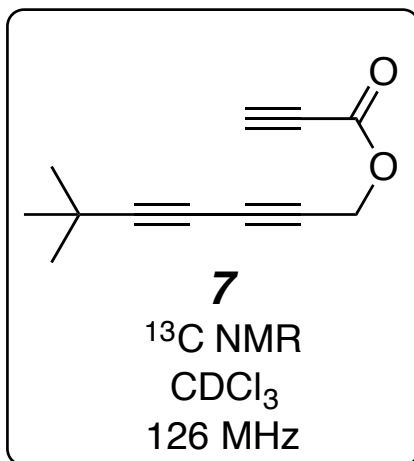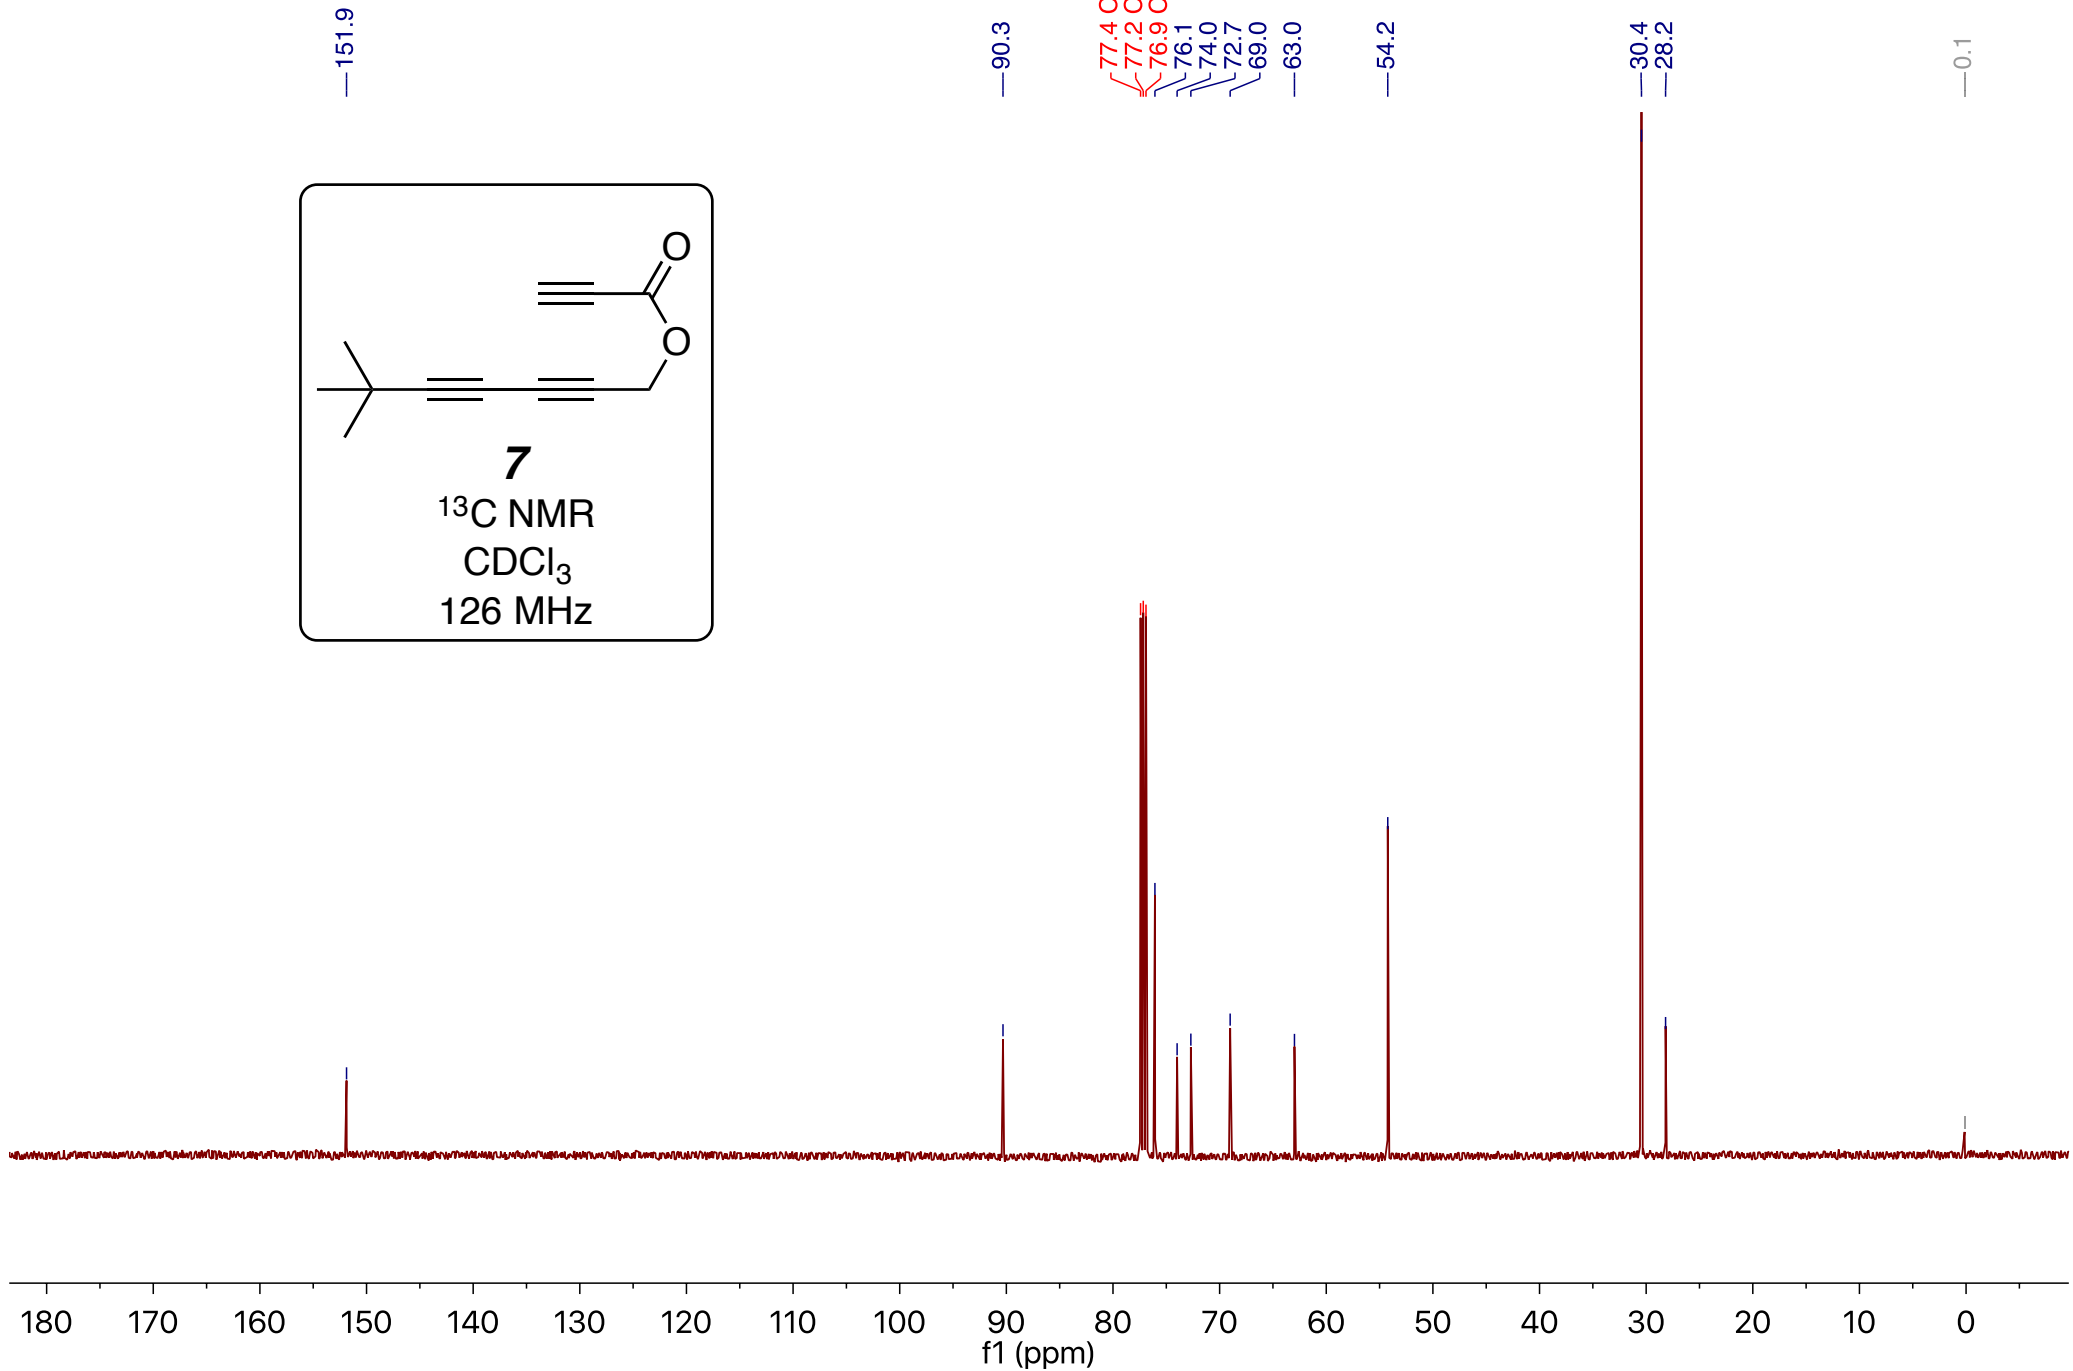

— 7.26 CDCl<sub>3</sub>

— 4.85

— 2.96

— 1.08  
— 1.08

— 0.00

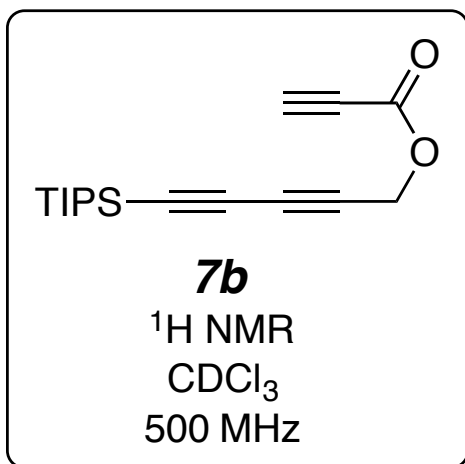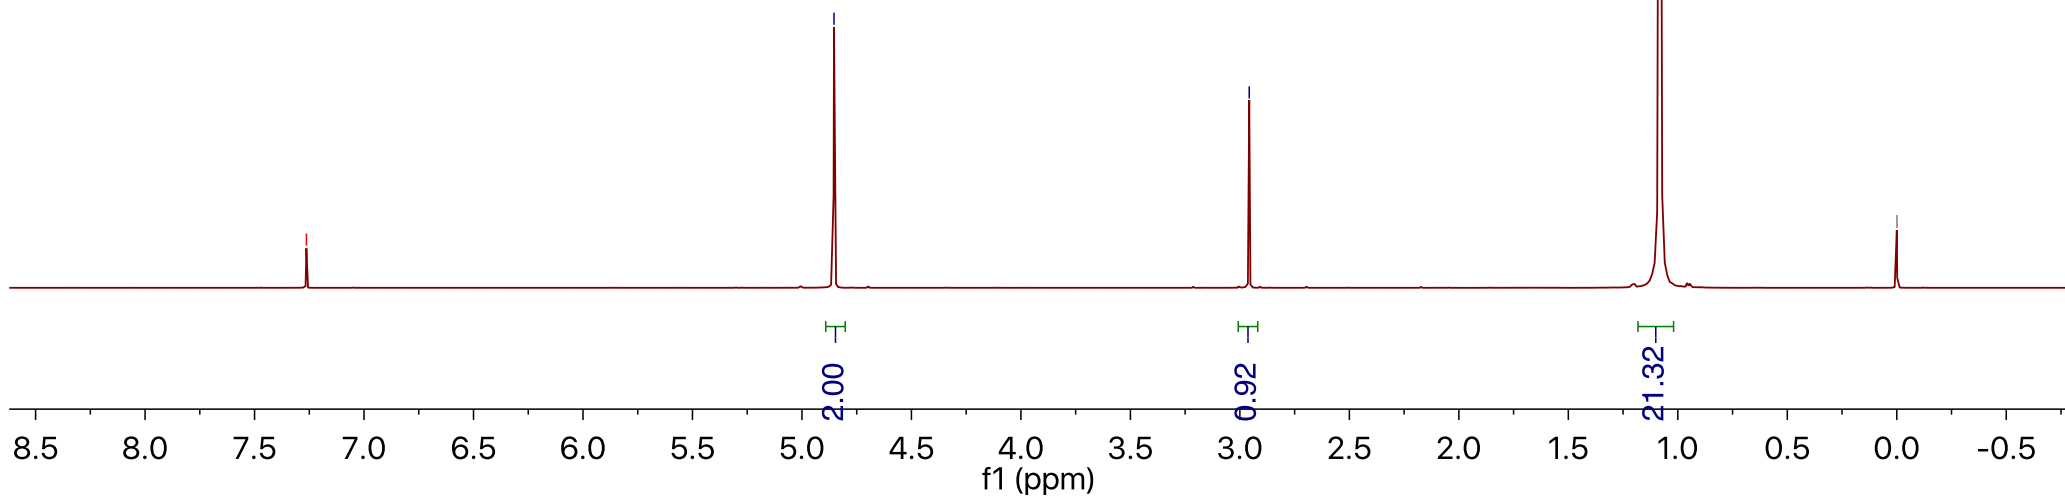

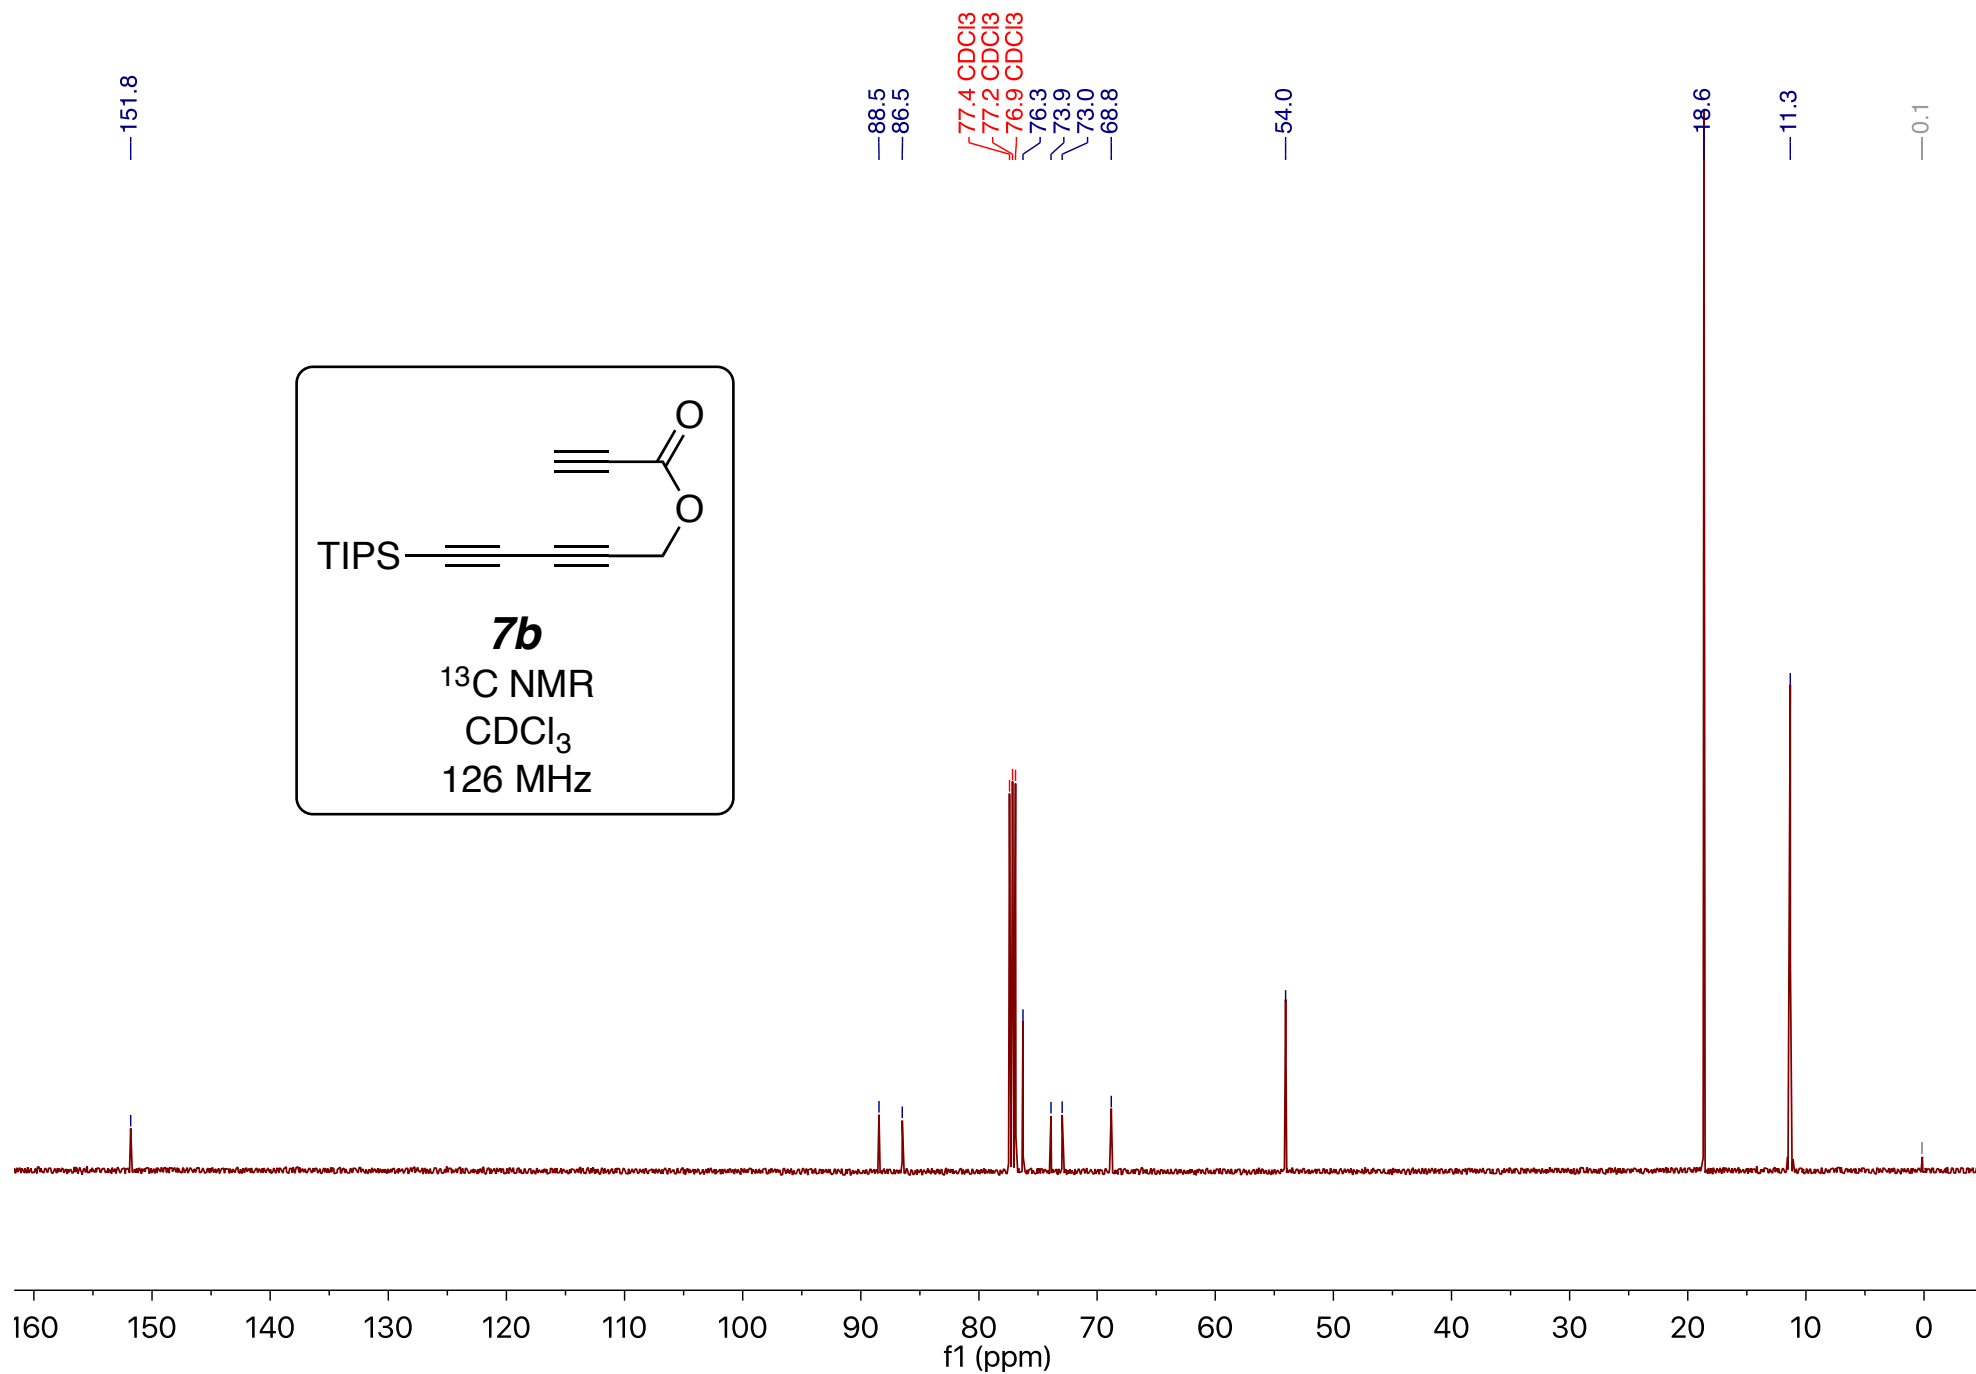

8.29  
8.27  
7.88  
7.86  
7.84  
7.75  
7.74  
7.60  
7.58  
7.57  
7.54  
7.53  
7.51  
7.43  
7.41  
7.40  
7.25 CDCl<sub>3</sub>

4.95

0.26

-0.00

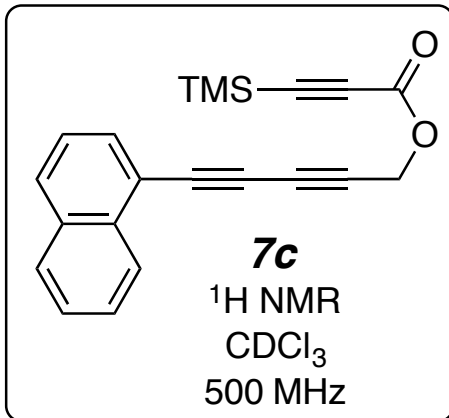

1.00

2.08

1.00

1.05

1.09

1.05

2.06

9.45

9.5 9.0 8.5 8.0 7.5 7.0 6.5 6.0 5.5 5.0 4.5 4.0 3.5 3.0 2.5 2.0 1.5 1.0 0.5 0.0 -0.5 -1.0  
f1 (ppm)

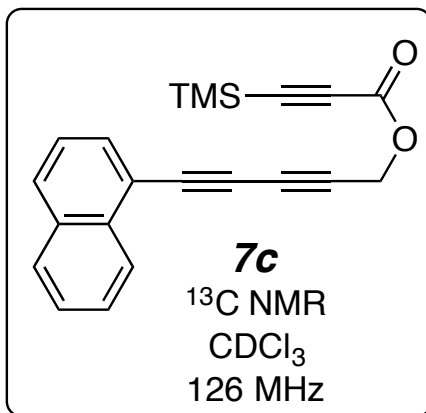

152.1  
134.1  
133.1  
132.5  
130.3  
128.6  
127.5  
126.9  
126.0  
125.3  
118.8

96.2  
93.7

77.8  
77.6  
77.4  
77.2  
76.9  
76.1  
72.3

54.0

-0.8

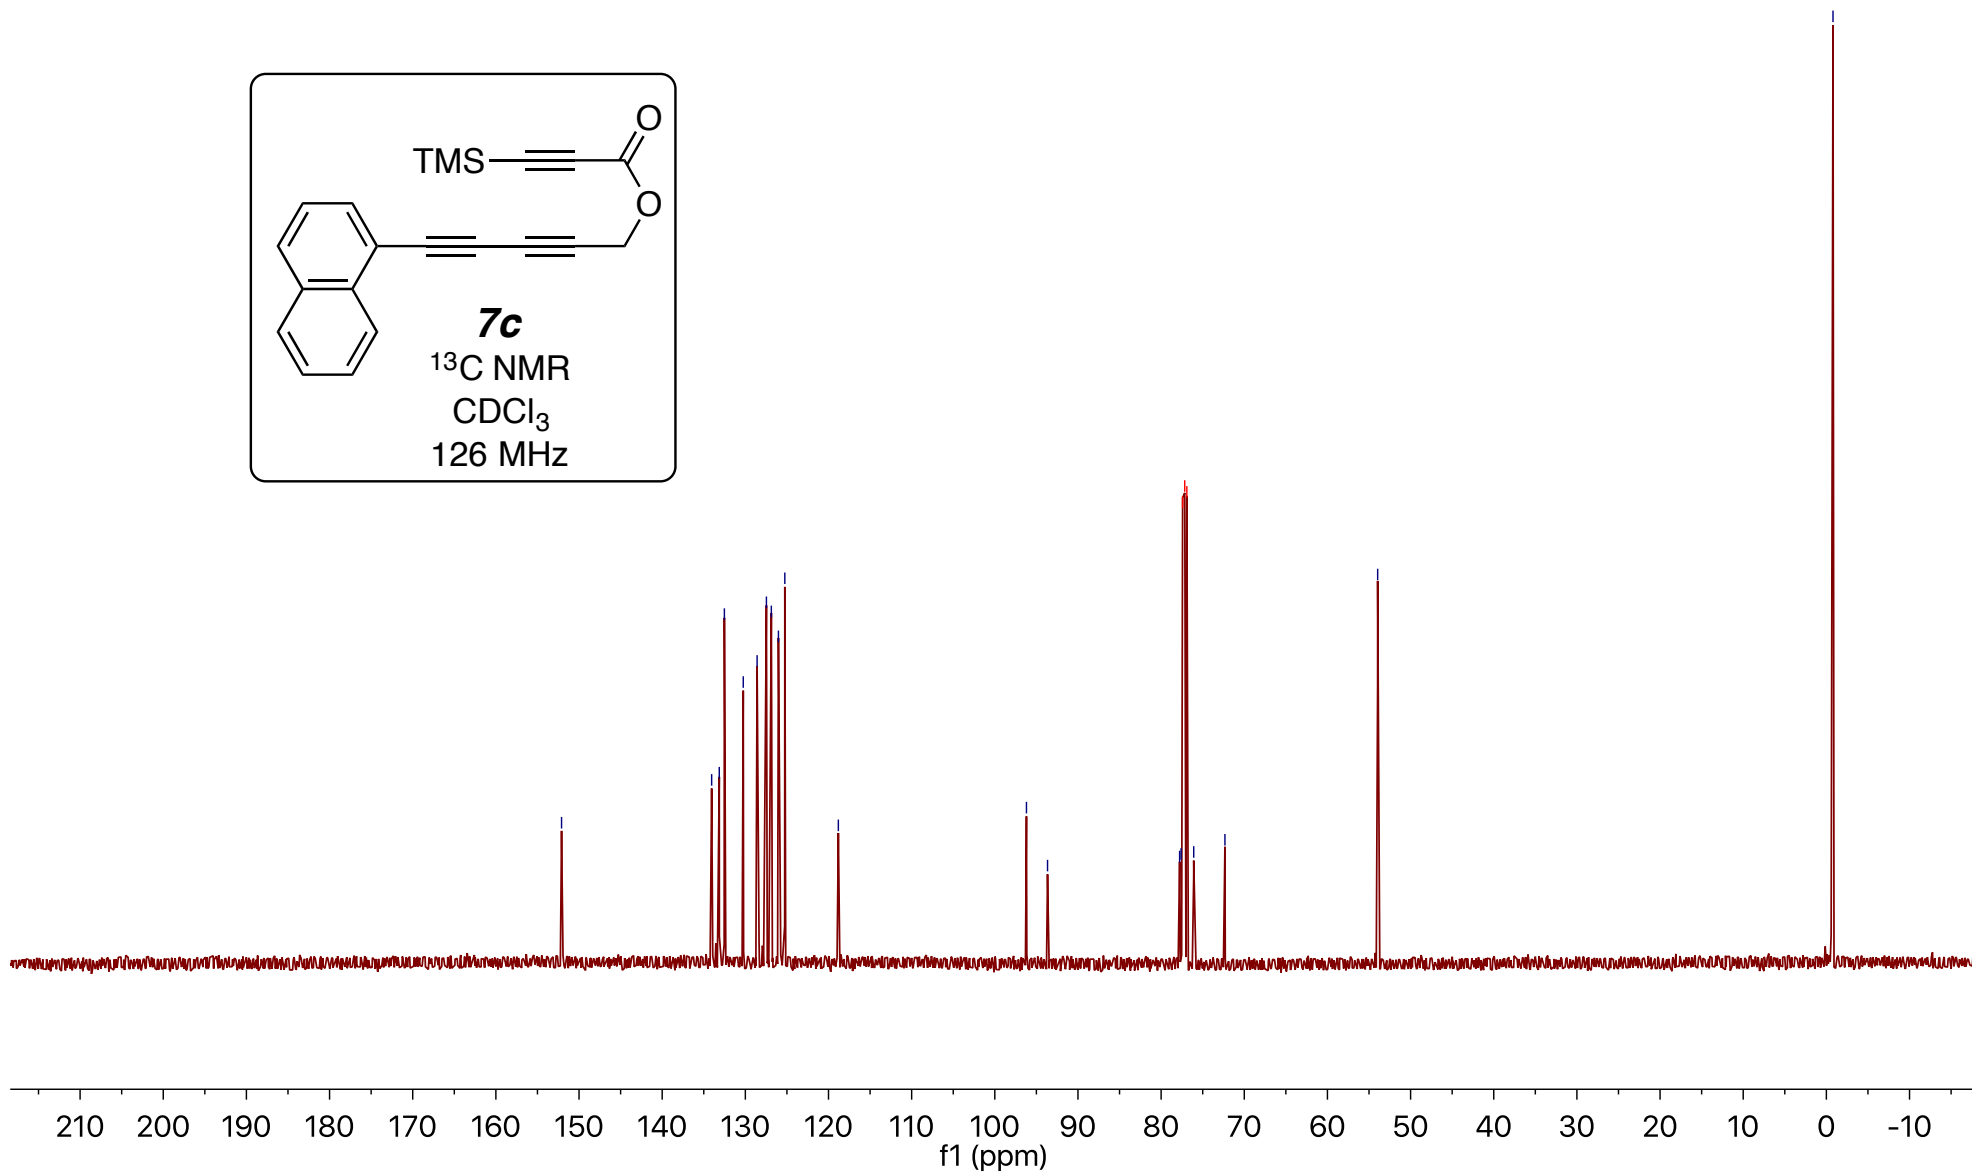



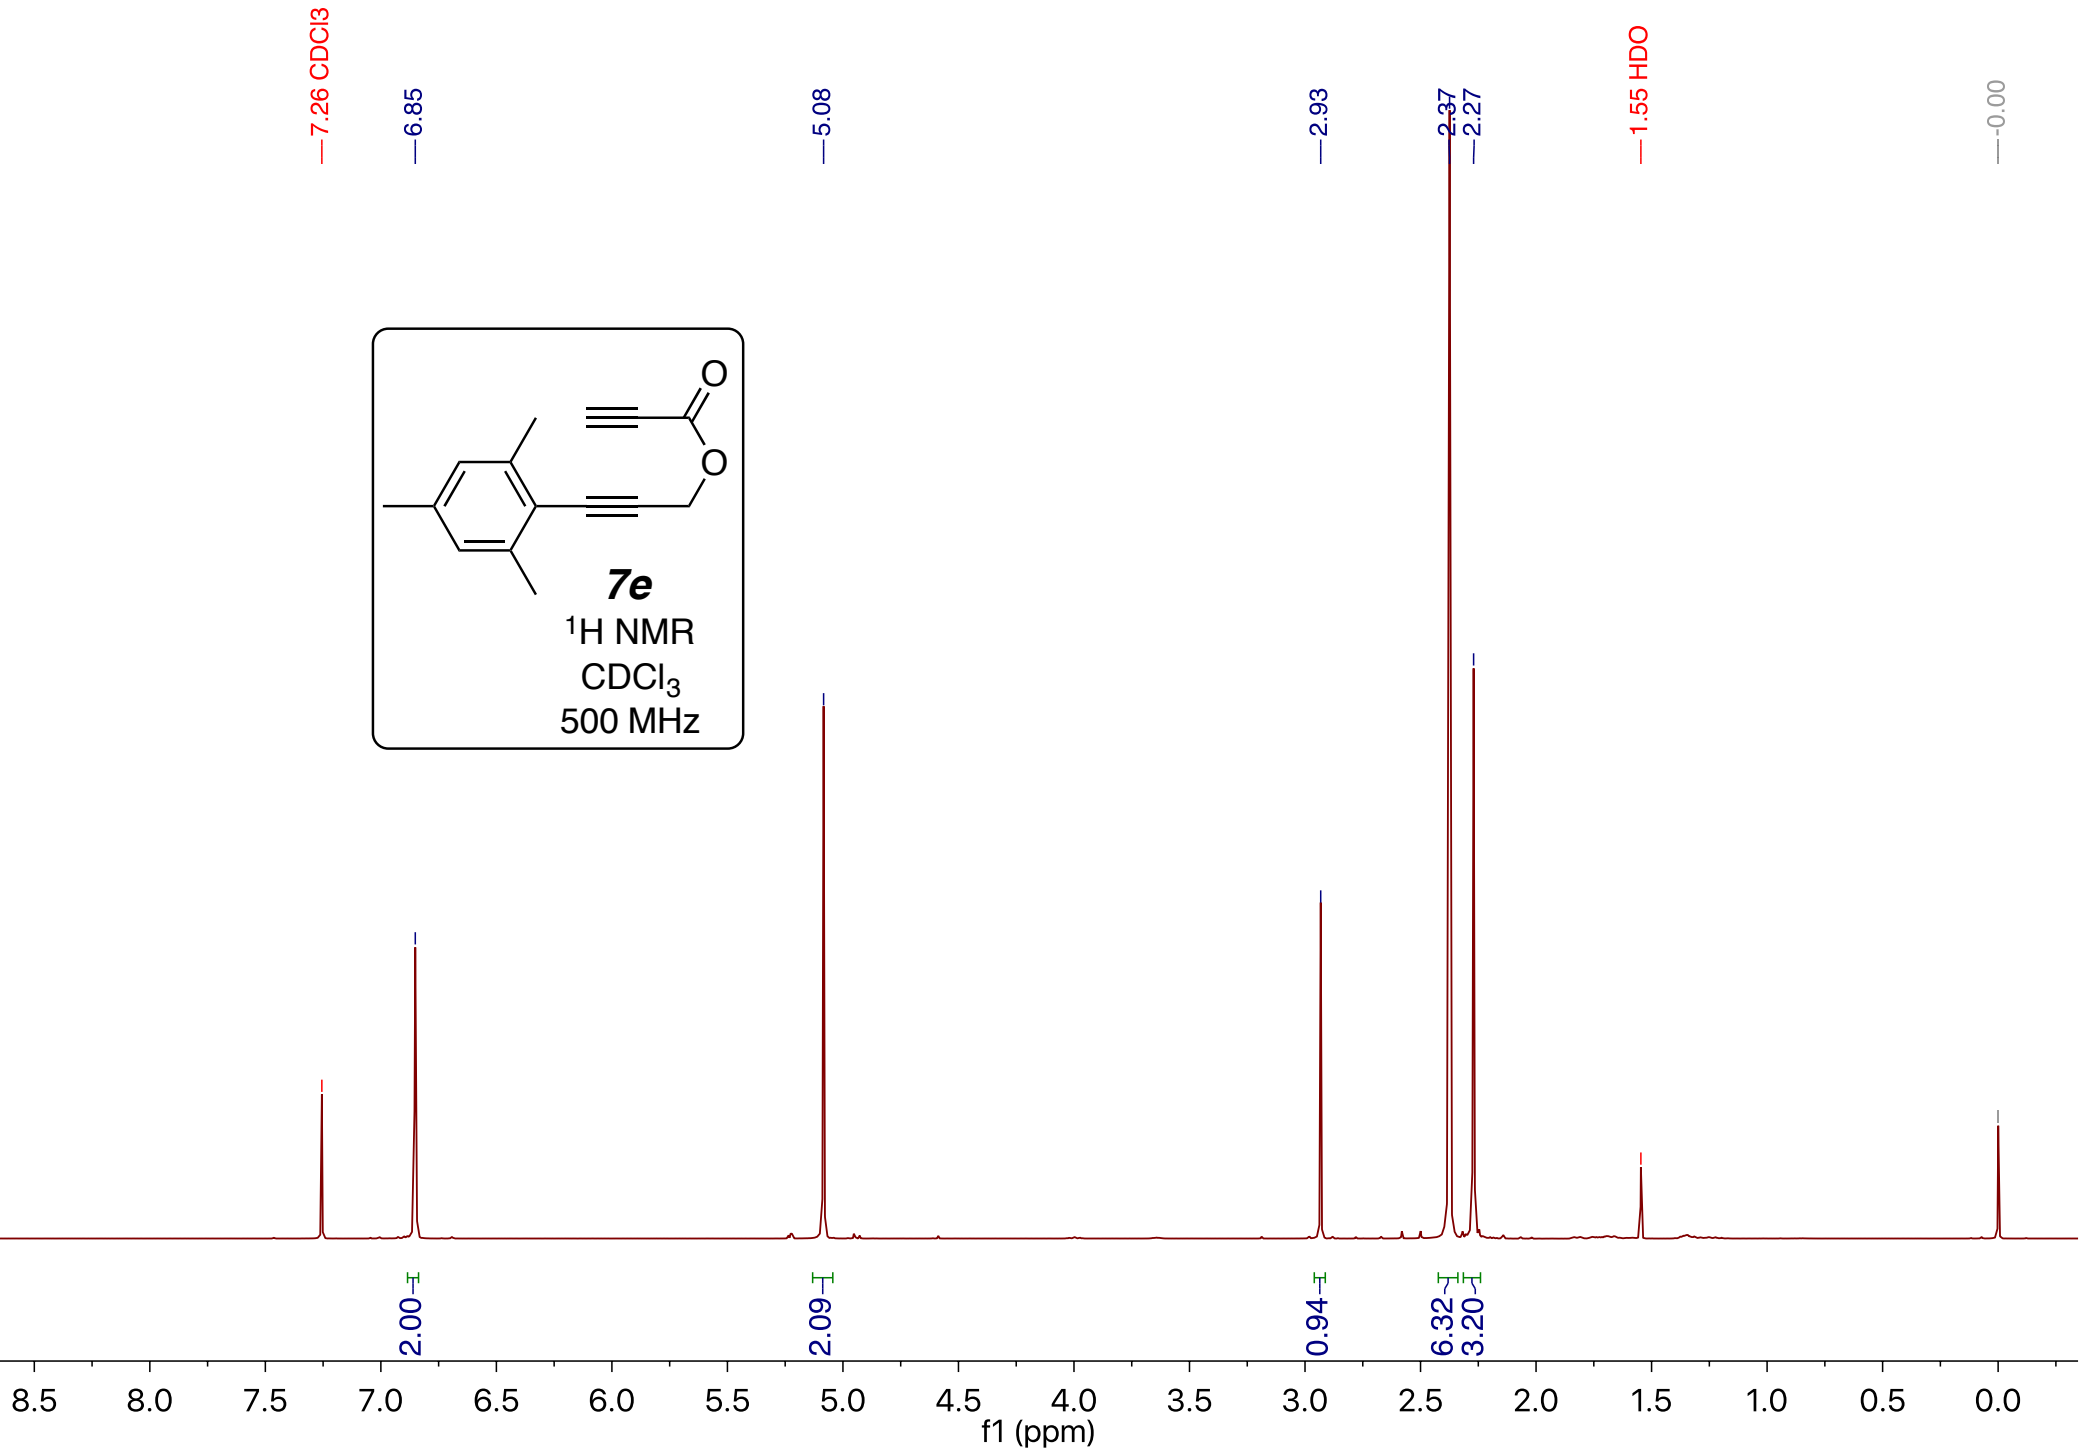

—152.2

—140.9  
—138.6

—127.7

—118.7

—89.0

—85.6

77.4 CDCl<sub>3</sub>77.2 CDCl<sub>3</sub>76.9 CDCl<sub>3</sub>

75.6

74.3

—54.9

21.5  
21.0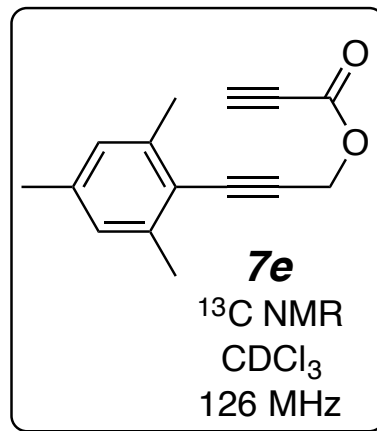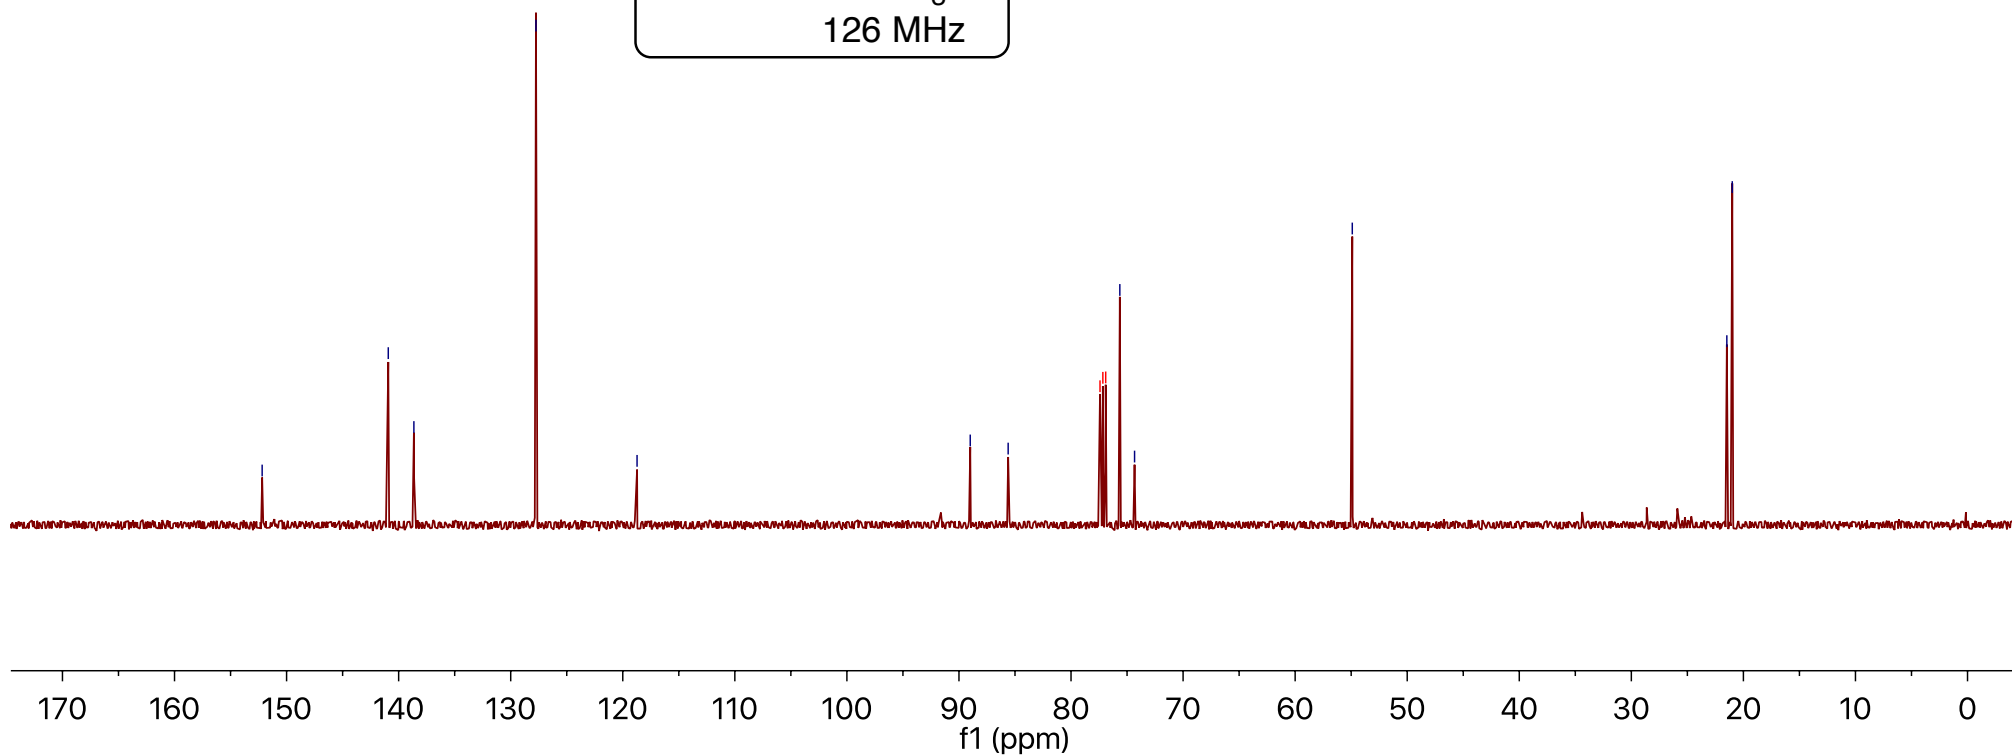

8.36  
8.297.27 CDCl<sub>3</sub>5.63  
5.604.12  
4.11 EtOAc

2.04 EtOAc

1.82

1.39

1.27

1.26

1.24 EtOAc

-0.00

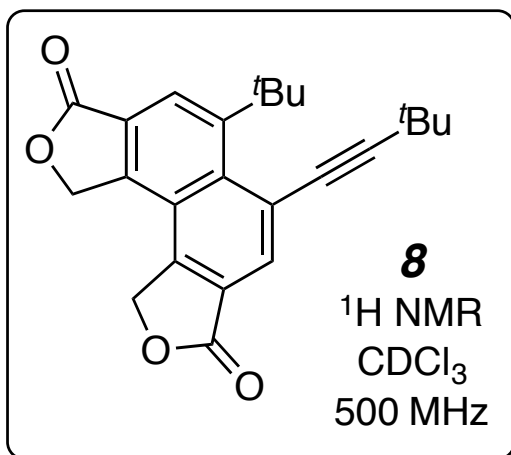1.00  
1.062.06  
1.92

8.86

9.28

9.0 8.5 8.0 7.5 7.0 6.5 6.0 5.5 5.0 4.5 4.0 3.5 3.0 2.5 2.0 1.5 1.0 0.5 0.0 -0.5  
f1 (ppm)

170.5  
169.7

152.3

145.2  
144.2

137.9

134.3

125.2  
124.7  
124.1  
123.2  
123.2

107.8

83.7

77.4 CDCl<sub>3</sub>  
77.2 CDCl<sub>3</sub>  
76.9 CDCl<sub>3</sub>69.8  
69.5

60.5 EtOAc

38.0

34.5

30.5  
28.8

21.2 EtOAc

14.3 EtOAc

0.1

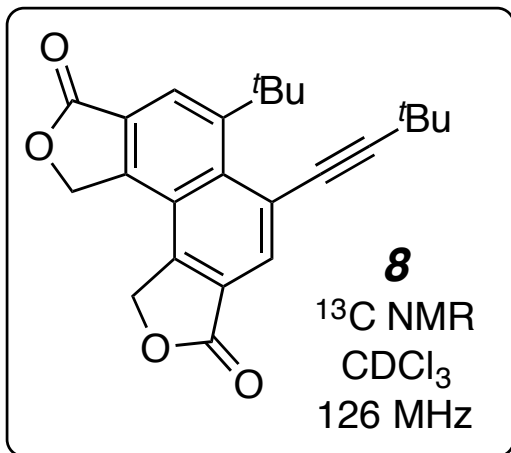180 170 160 150 140 130 120 110 100 90 80 70 60 50 40 30 20 10 0  
f1 (ppm)

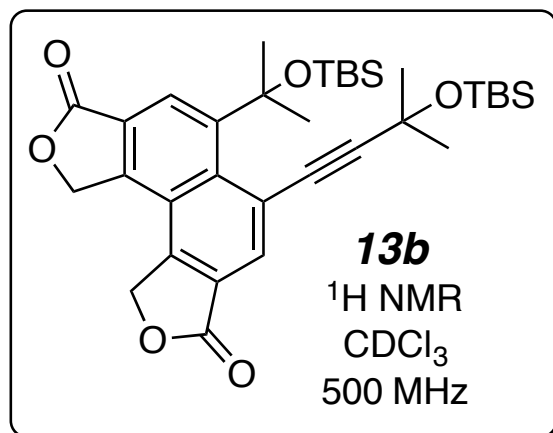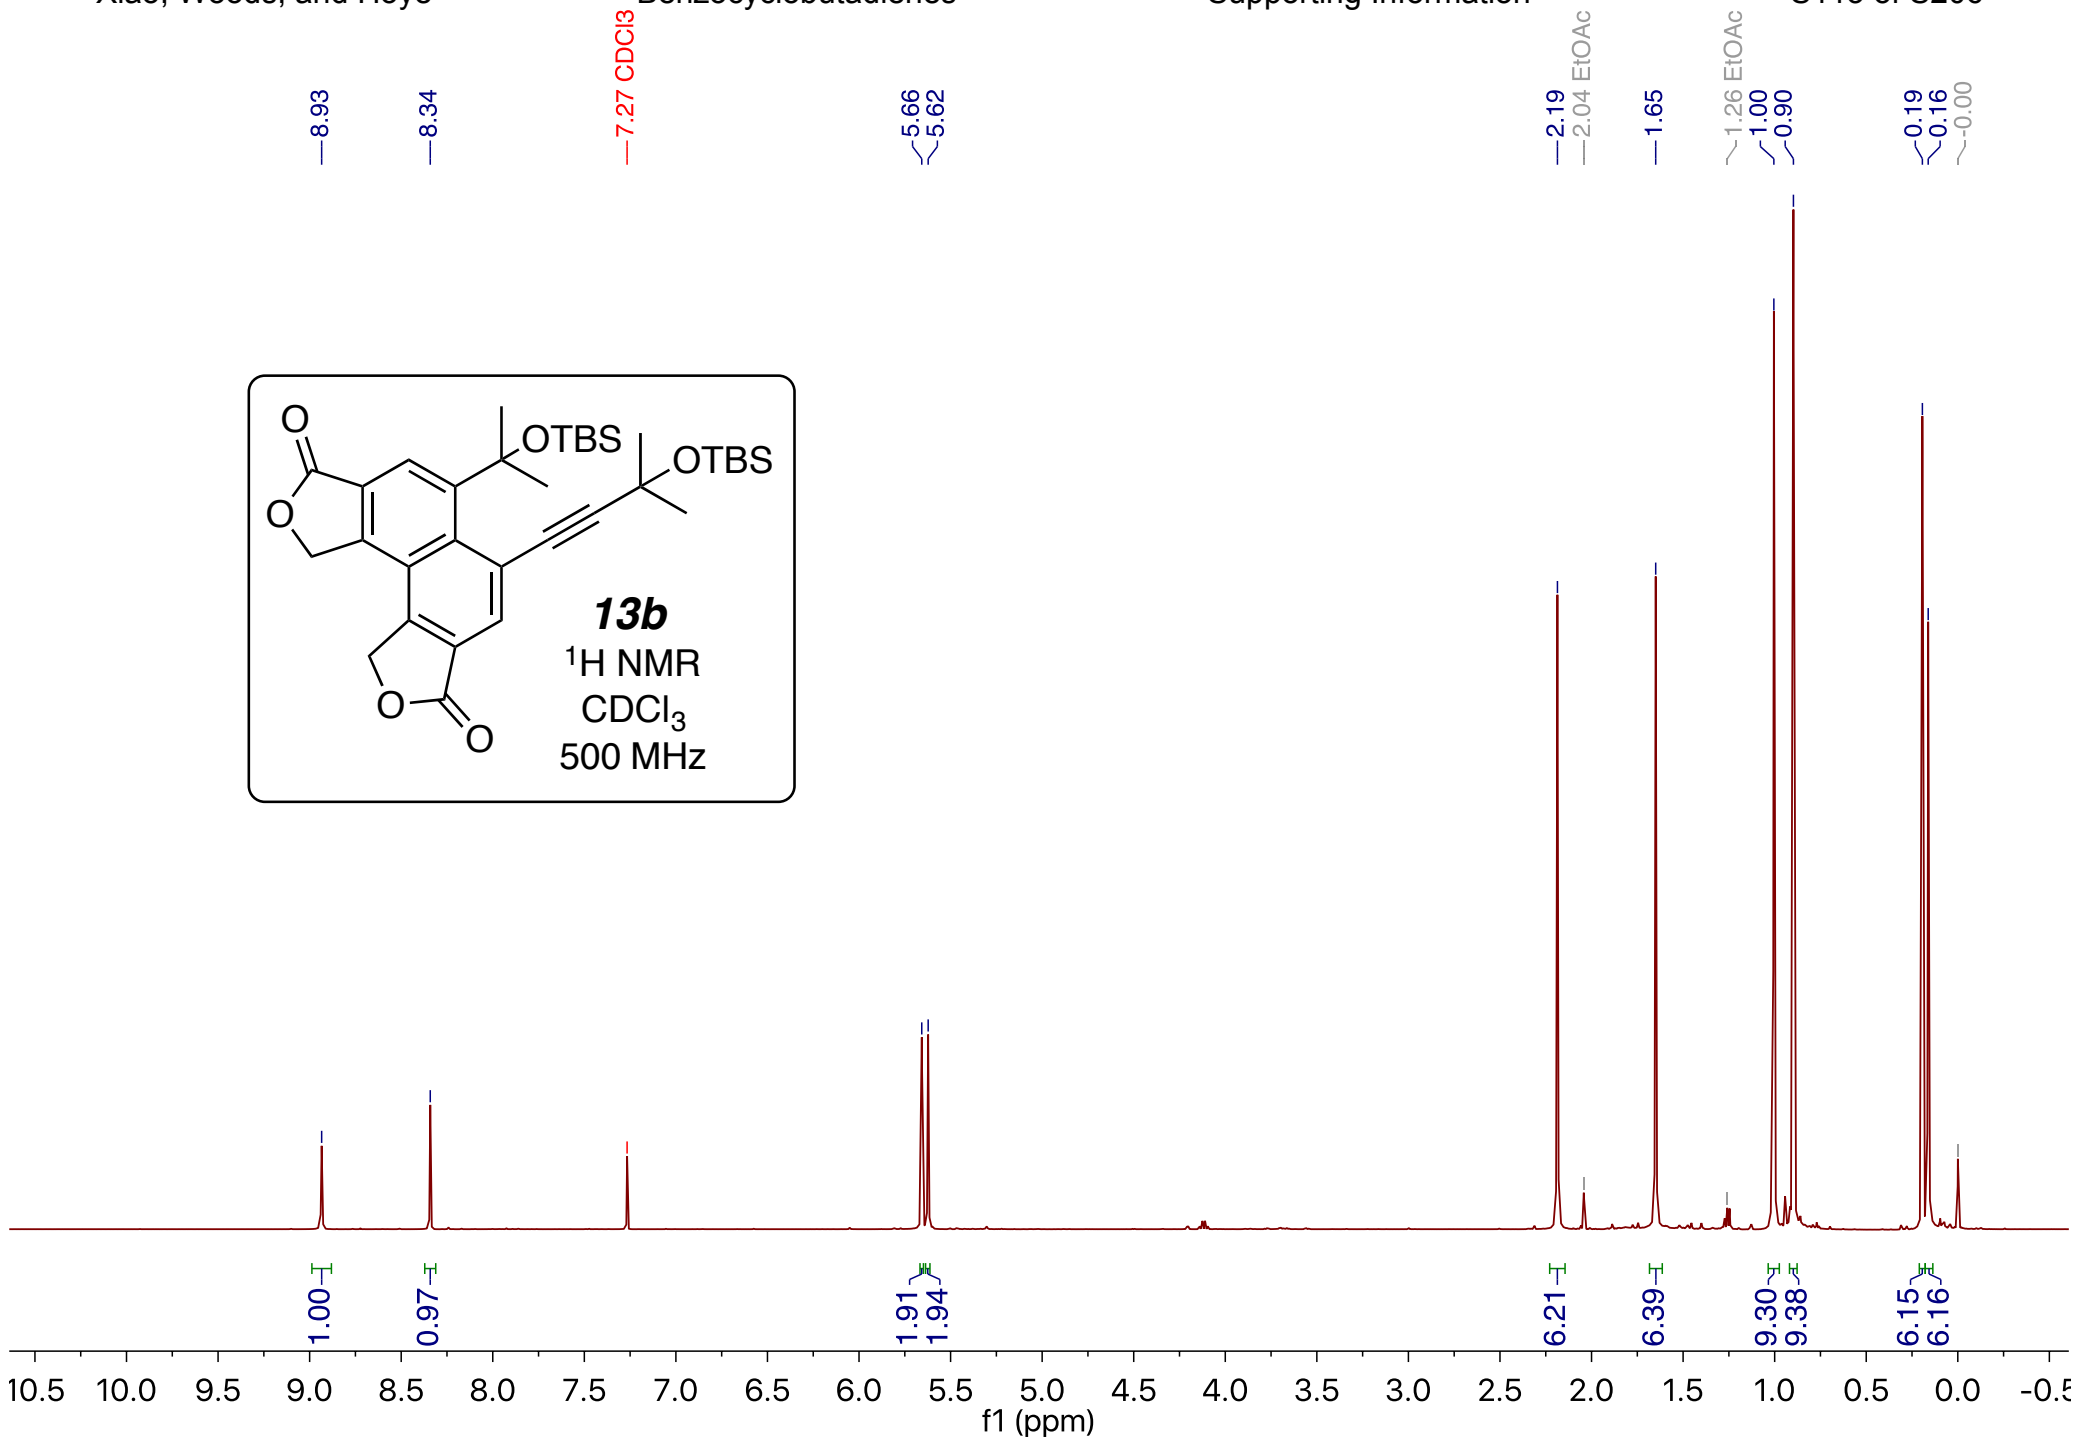

170.1  
169.4

152.1

146.0  
144.6

135.6

133.8

124.5

124.5

124.3

123.5

123.3

103.6

85.3

77.5

77.4 CDCl<sub>3</sub>77.2 CDCl<sub>3</sub>76.9 CDCl<sub>3</sub>

69.7

69.4

67.5

34.1

32.4

26.3

25.8

18.6

18.1

-1.5

-2.5

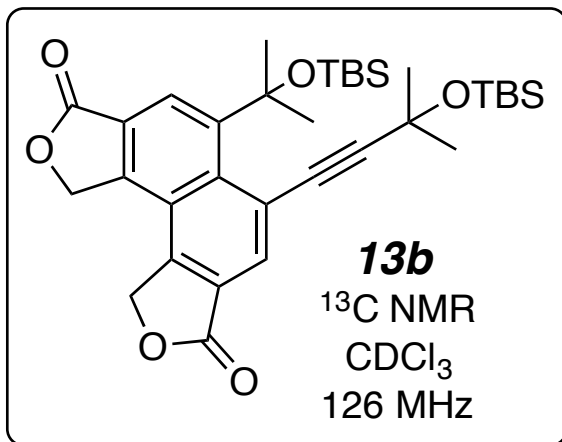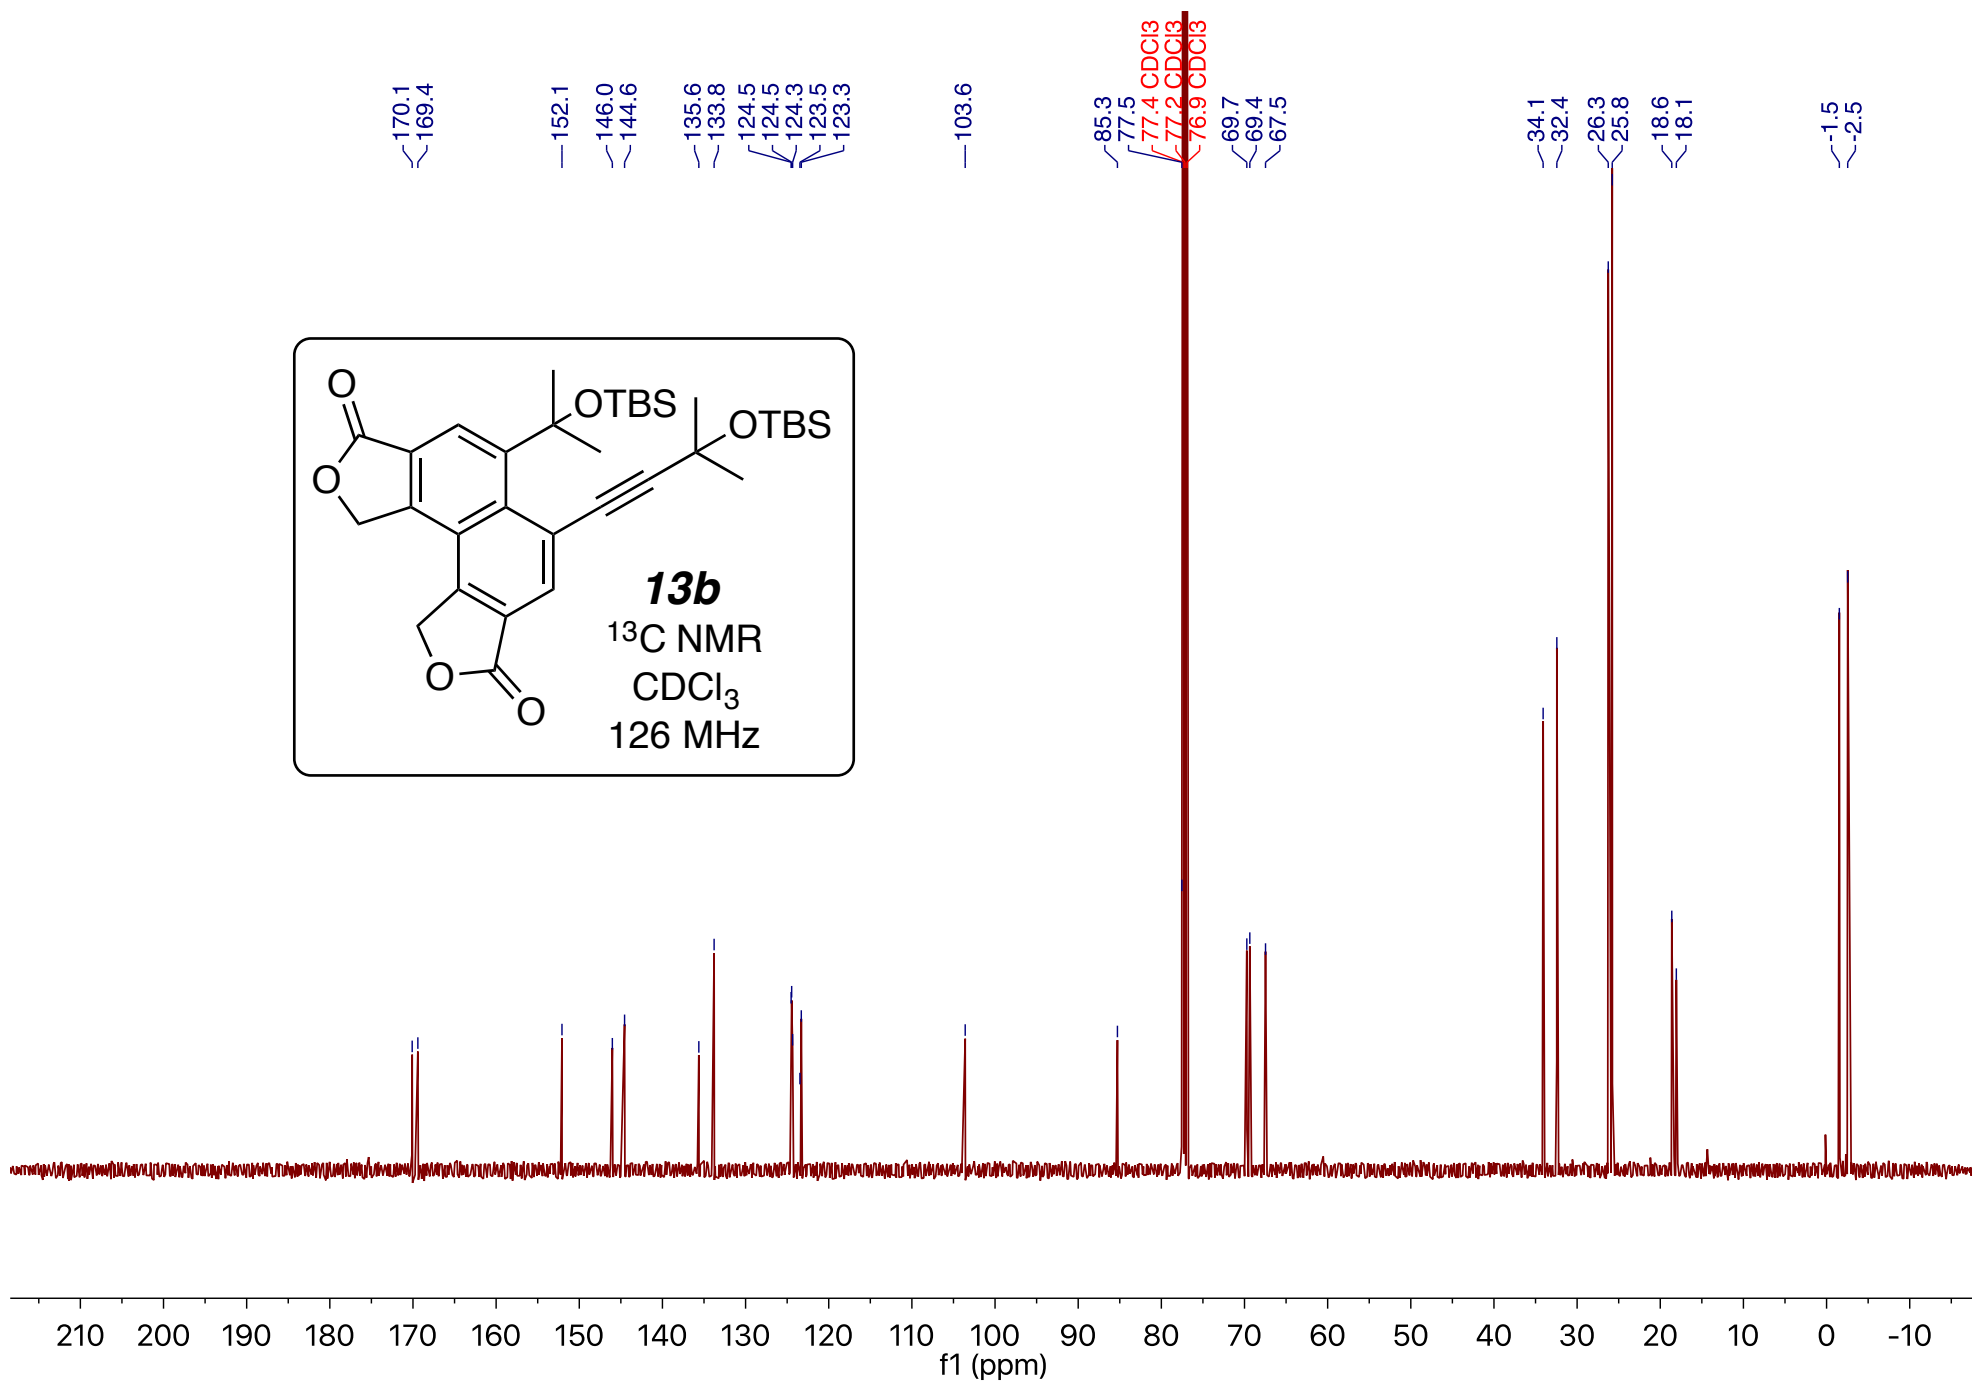

8.68  
8.688.27  
8.26-7.25 CDCl<sub>3</sub>6.98  
6.97  
6.95  
6.94  
6.93  
6.92  
6.915.64  
5.624.89  
4.87  
4.86  
4.85

-2.37

1.60  
1.59  
1.58  
1.56  
1.55  
1.460.94  
0.93  
0.91  
0.90  
0.85  
0.17  
0.15  
0.12  
0.11  
0.08  
-0.02  
-0.02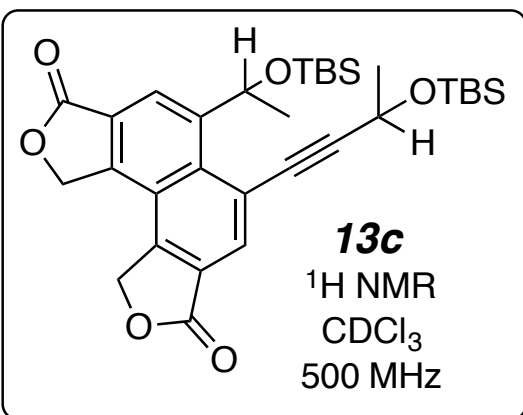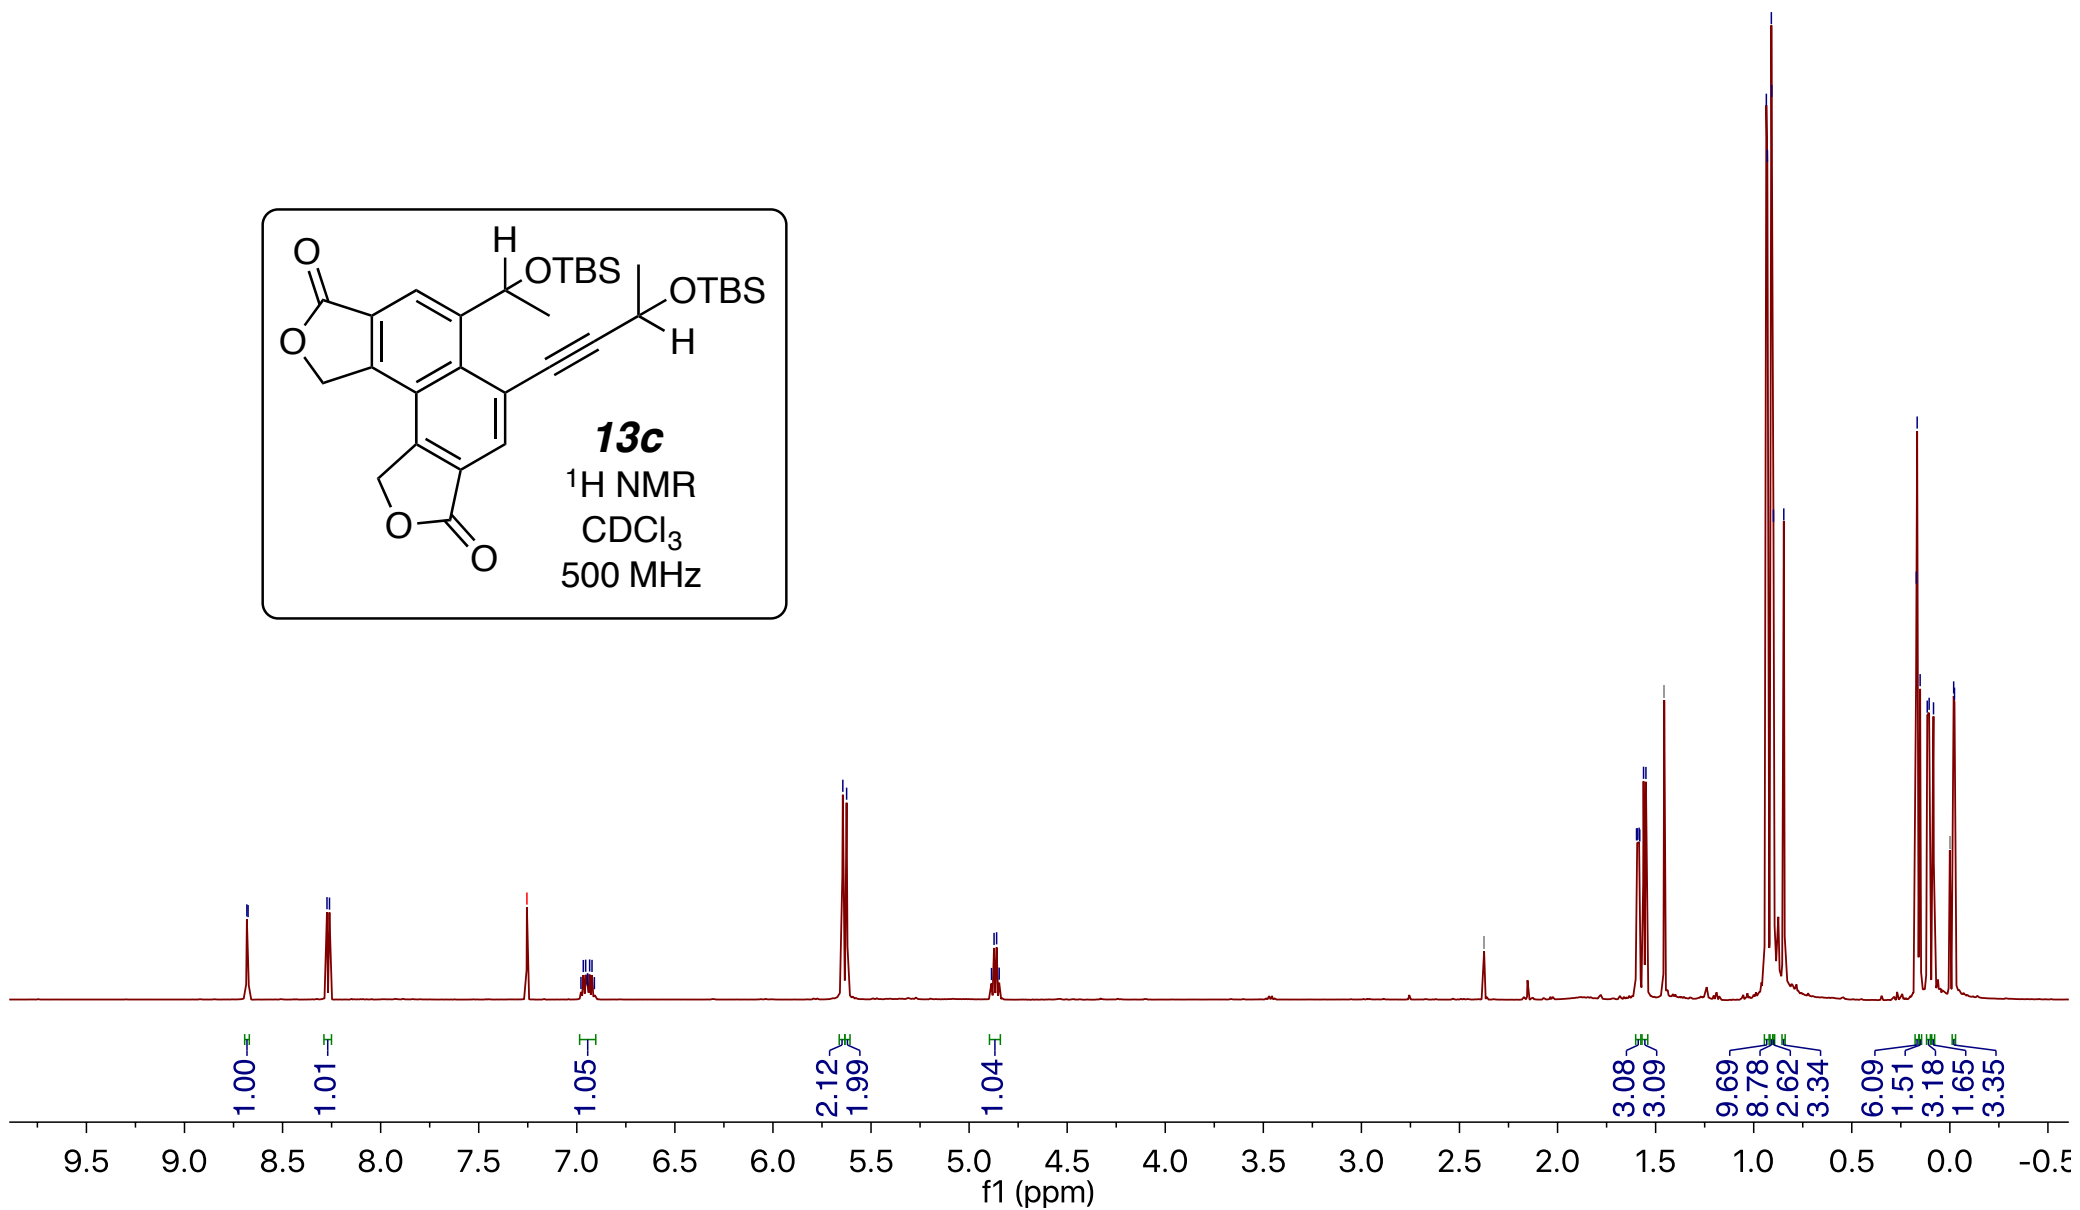

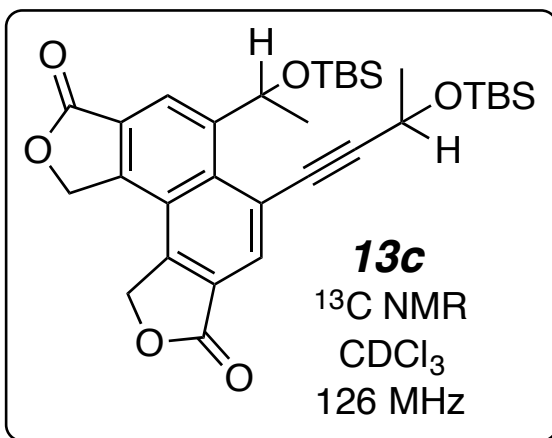170.2  
169.4

150.2

150.2

145.7

145.6

144.1

144.1

134.7

134.6

132.6

132.3

125.1

123.8

123.8

123.1

123.1

123.0

122.9

122.5

99.9

99.8

83.4

83.4

77.4  $\text{CDCl}_3$ 77.2  $\text{CDCl}_3$ 76.9  $\text{CDCl}_3$ 

70.7

69.6

69.4

67.2

67.0

59.7

33.0

29.1

29.0

26.0

25.9

25.8

25.8

25.8

25.3

18.4

18.3

18.3

-2.8

-2.9

-3.4

-4.3

-4.4

-4.4

-4.4

-4.4

-4.6

-4.6

-4.6

-4.7

-4.8

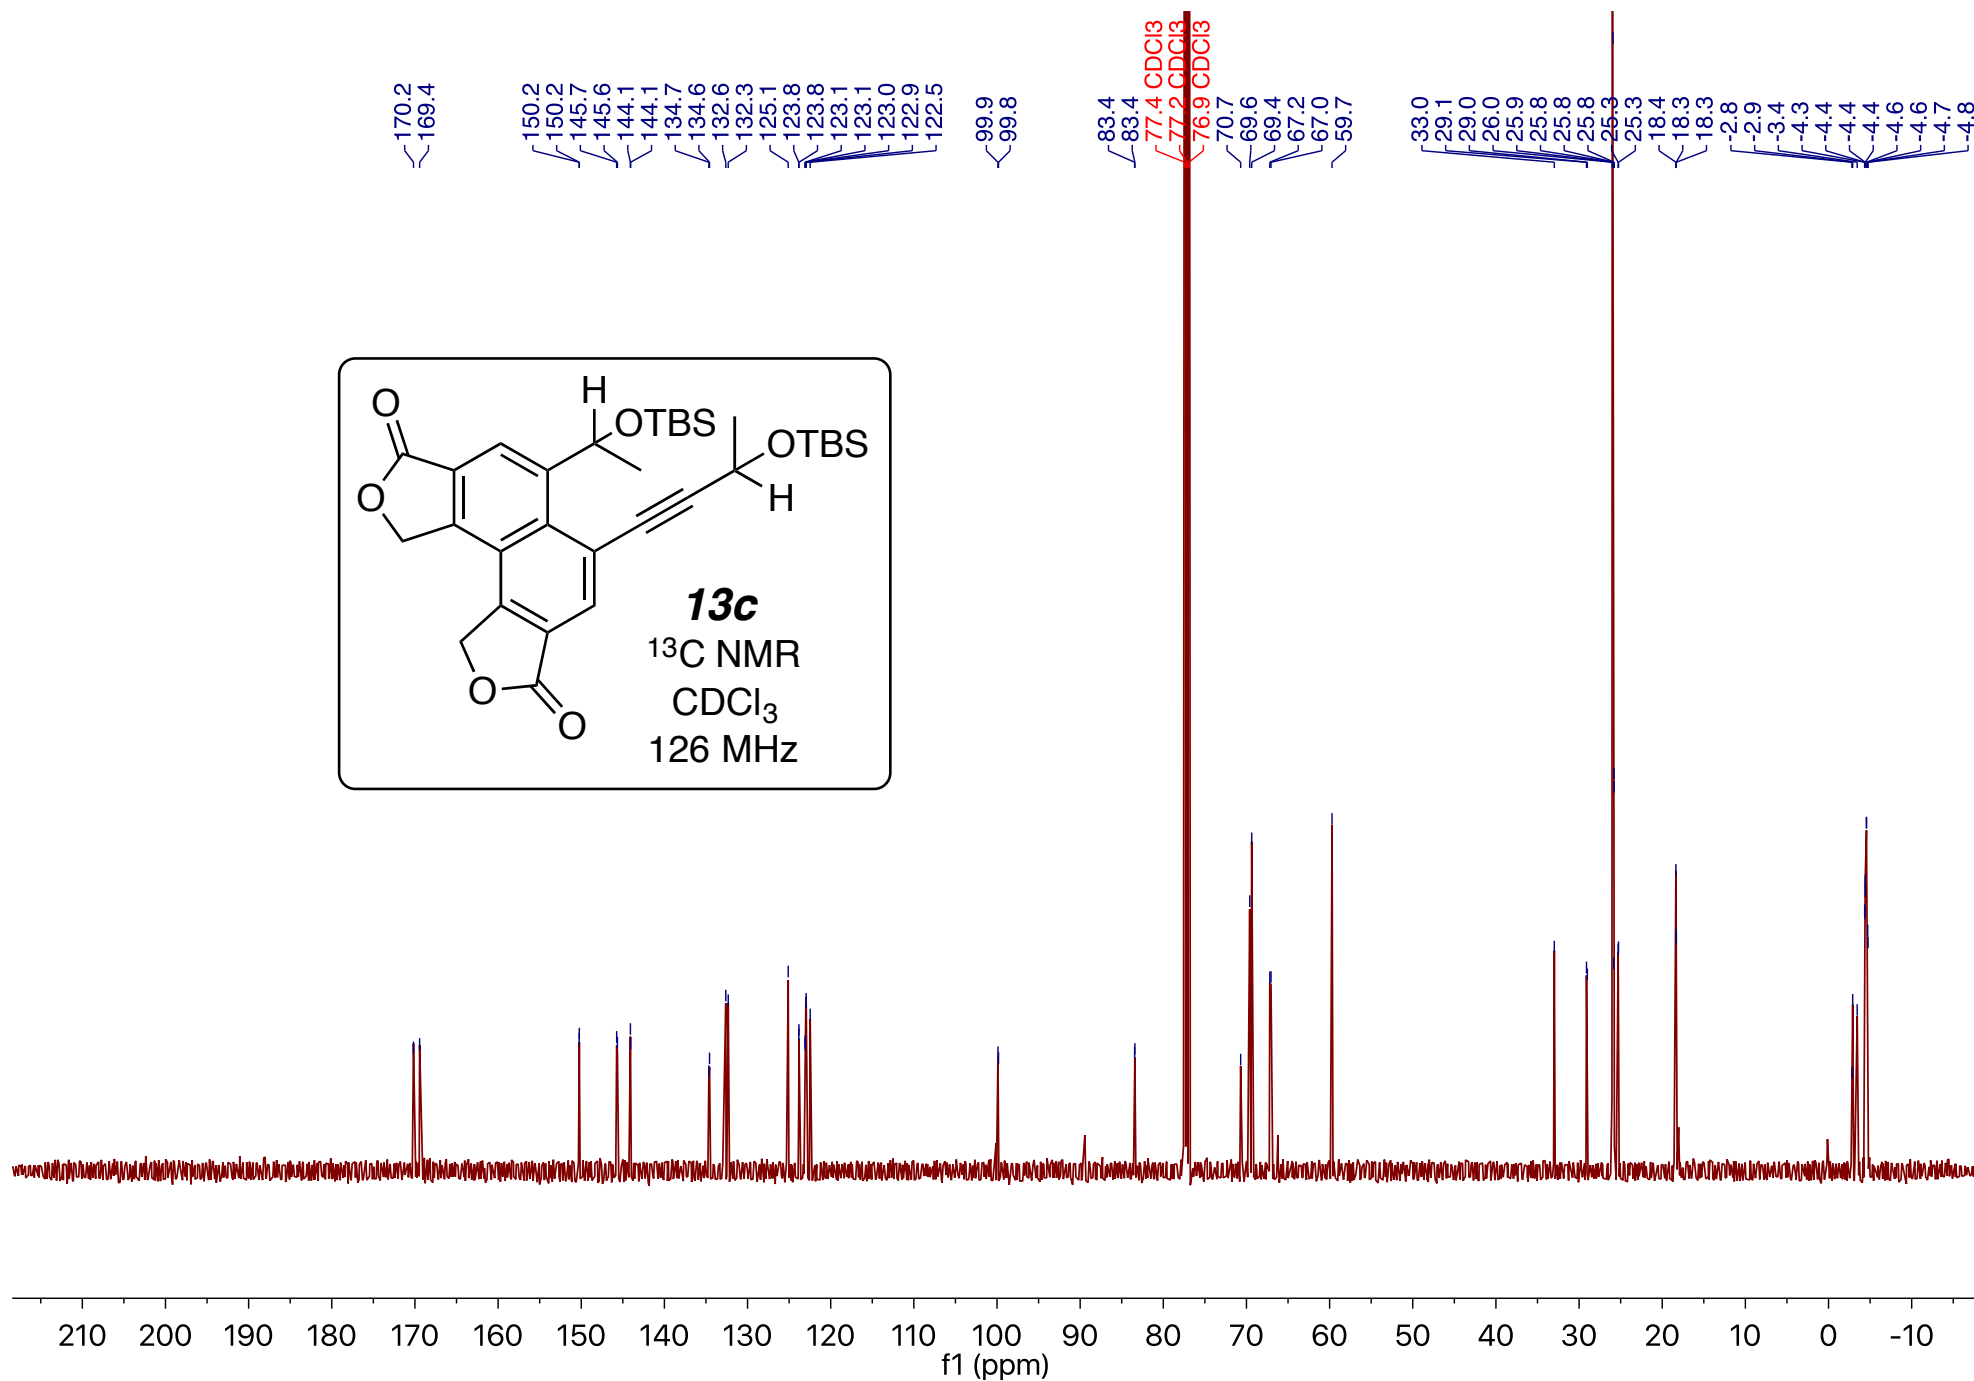





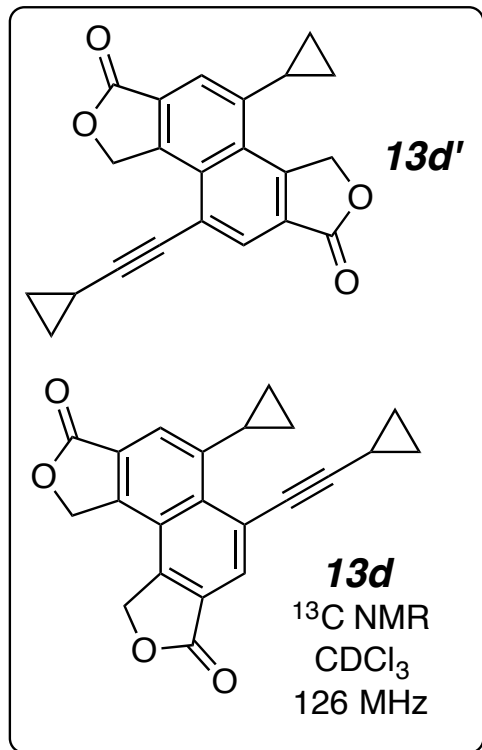

170.9  
170.3  
170.2  
169.6

145.8  
145.4  
145.3  
144.2  
143.6  
142.8  
139.1  
133.0  
132.2  
131.8  
128.0  
126.3  
126.1  
125.3  
124.6  
124.1  
124.0  
123.2  
123.1  
122.6  
102.6  
101.7

77.4  $\text{CDCl}_3$   
77.2  $\text{CDCl}_3$   
76.9  $\text{CDCl}_3$   
76.8  
74.8  
72.2  
71.7  
69.5  
69.4

18.1  
16.1  
10.4  
8.8  
8.6  
1.0  
0.6  
0.1

210 200 190 180 170 160 150 140 130 120 110 100 90 80 70 60 50 40 30 20 10 0 -10

f1 (ppm)

8.47  
8.417.27 CDCl<sub>3</sub>5.65  
5.62

0.62

0.33

0.00

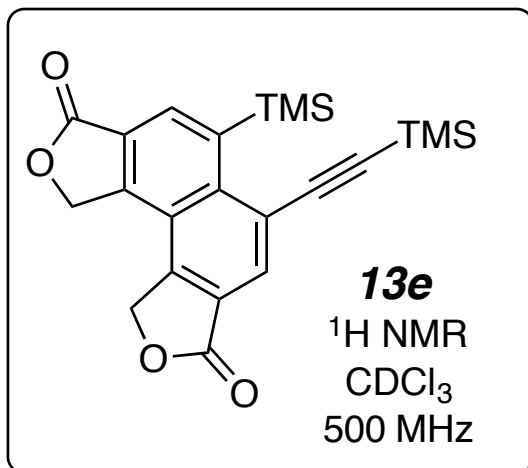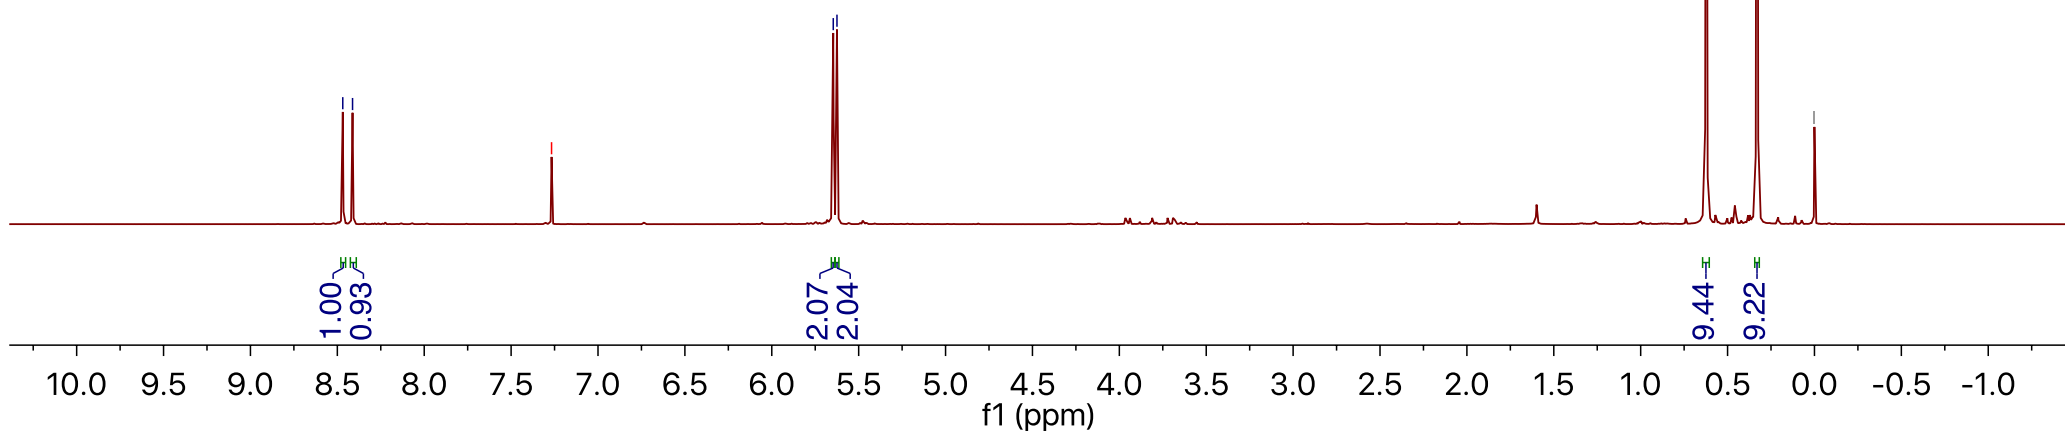

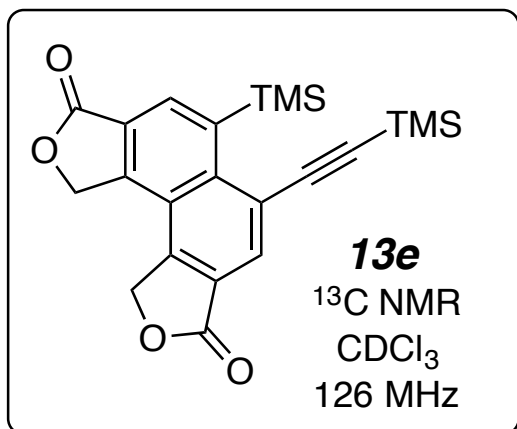

170.3  
169.5

146.8  
145.8  
144.3  
142.8

133.9  
133.7  
126.2  
123.9  
123.8  
122.9

107.5  
106.2

77.4 CDCl<sub>3</sub>  
77.2 CDCl<sub>3</sub>  
76.9 CDCl<sub>3</sub>  
69.6  
69.3

4.2  
0.1  
-0.2

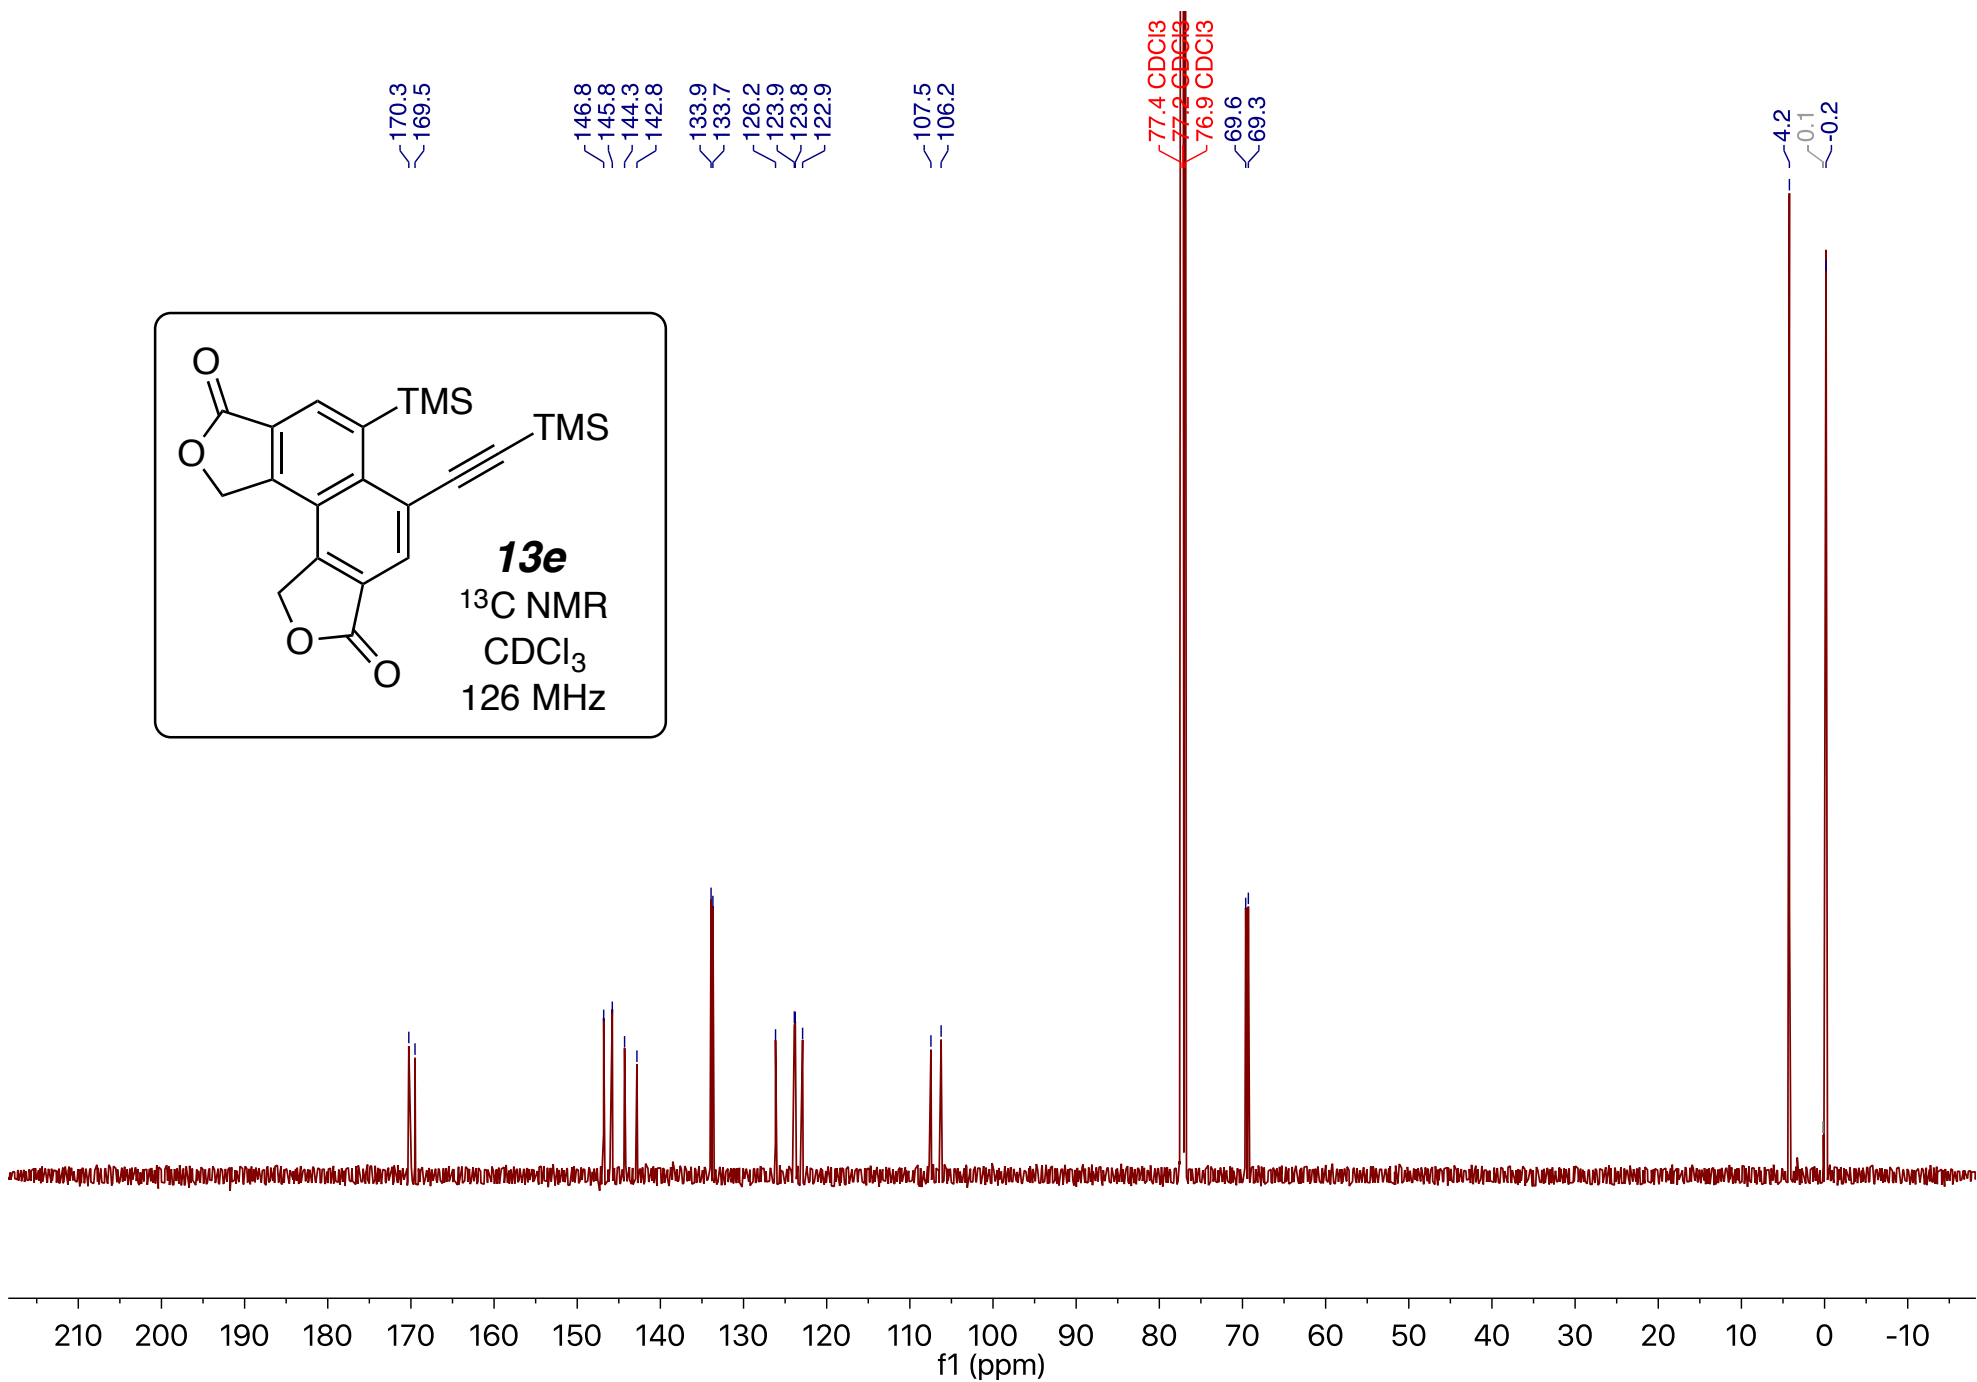

8.56  
8.367.27 CDCl<sub>3</sub>5.64  
5.621.10  
1.06

0.64

0.25

0.00

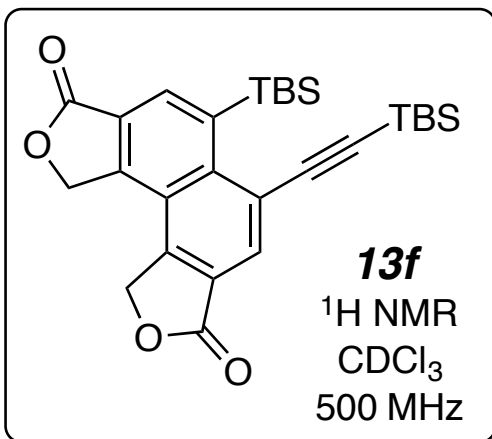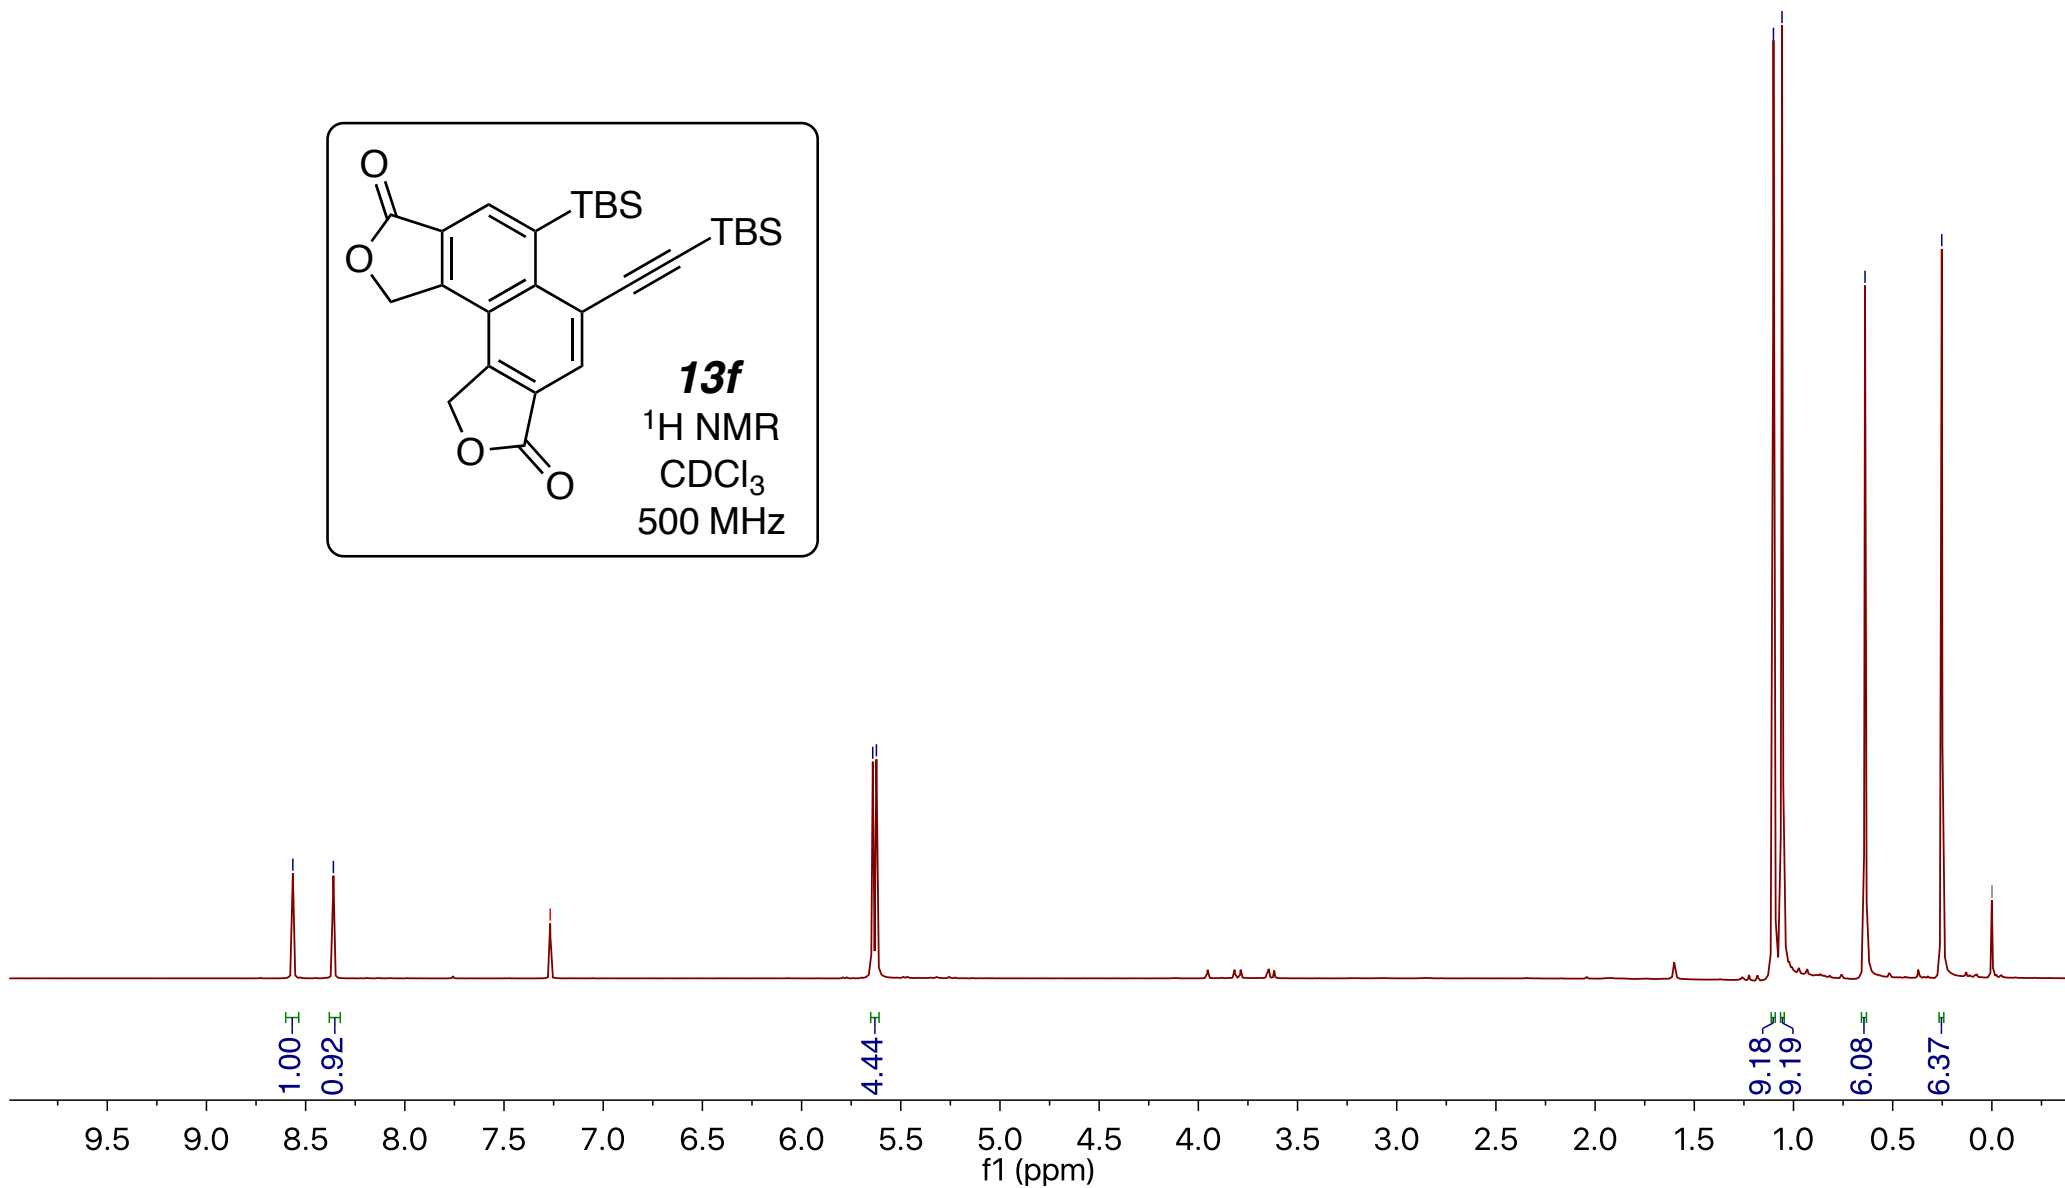

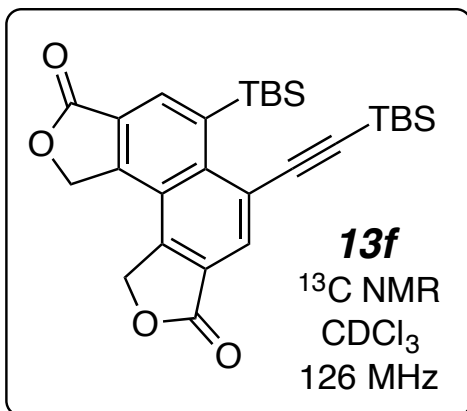

170.1  
169.5

146.6  
145.9

143.1  
142.8

134.0  
133.9

126.5  
123.8

123.3  
123.2

107.4  
106.5

77.4  $\text{CDCl}_3$   
77.2  $\text{CDCl}_3$   
76.9  $\text{CDCl}_3$   
69.6  
69.3

28.5  
26.5

19.4  
17.4

0.9  
0.1  
-4.7

210 200 190 180 170 160 150 140 130 120 110 100 90 80 70 60 50 40 30 20 10 0 -10  
f1 (ppm)

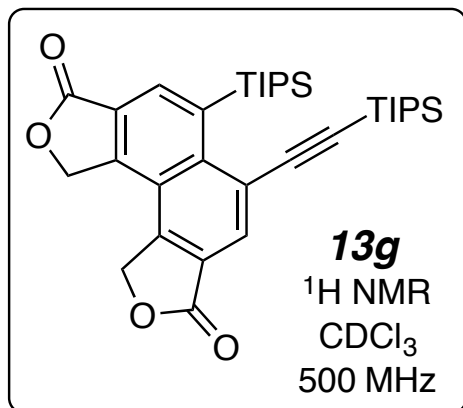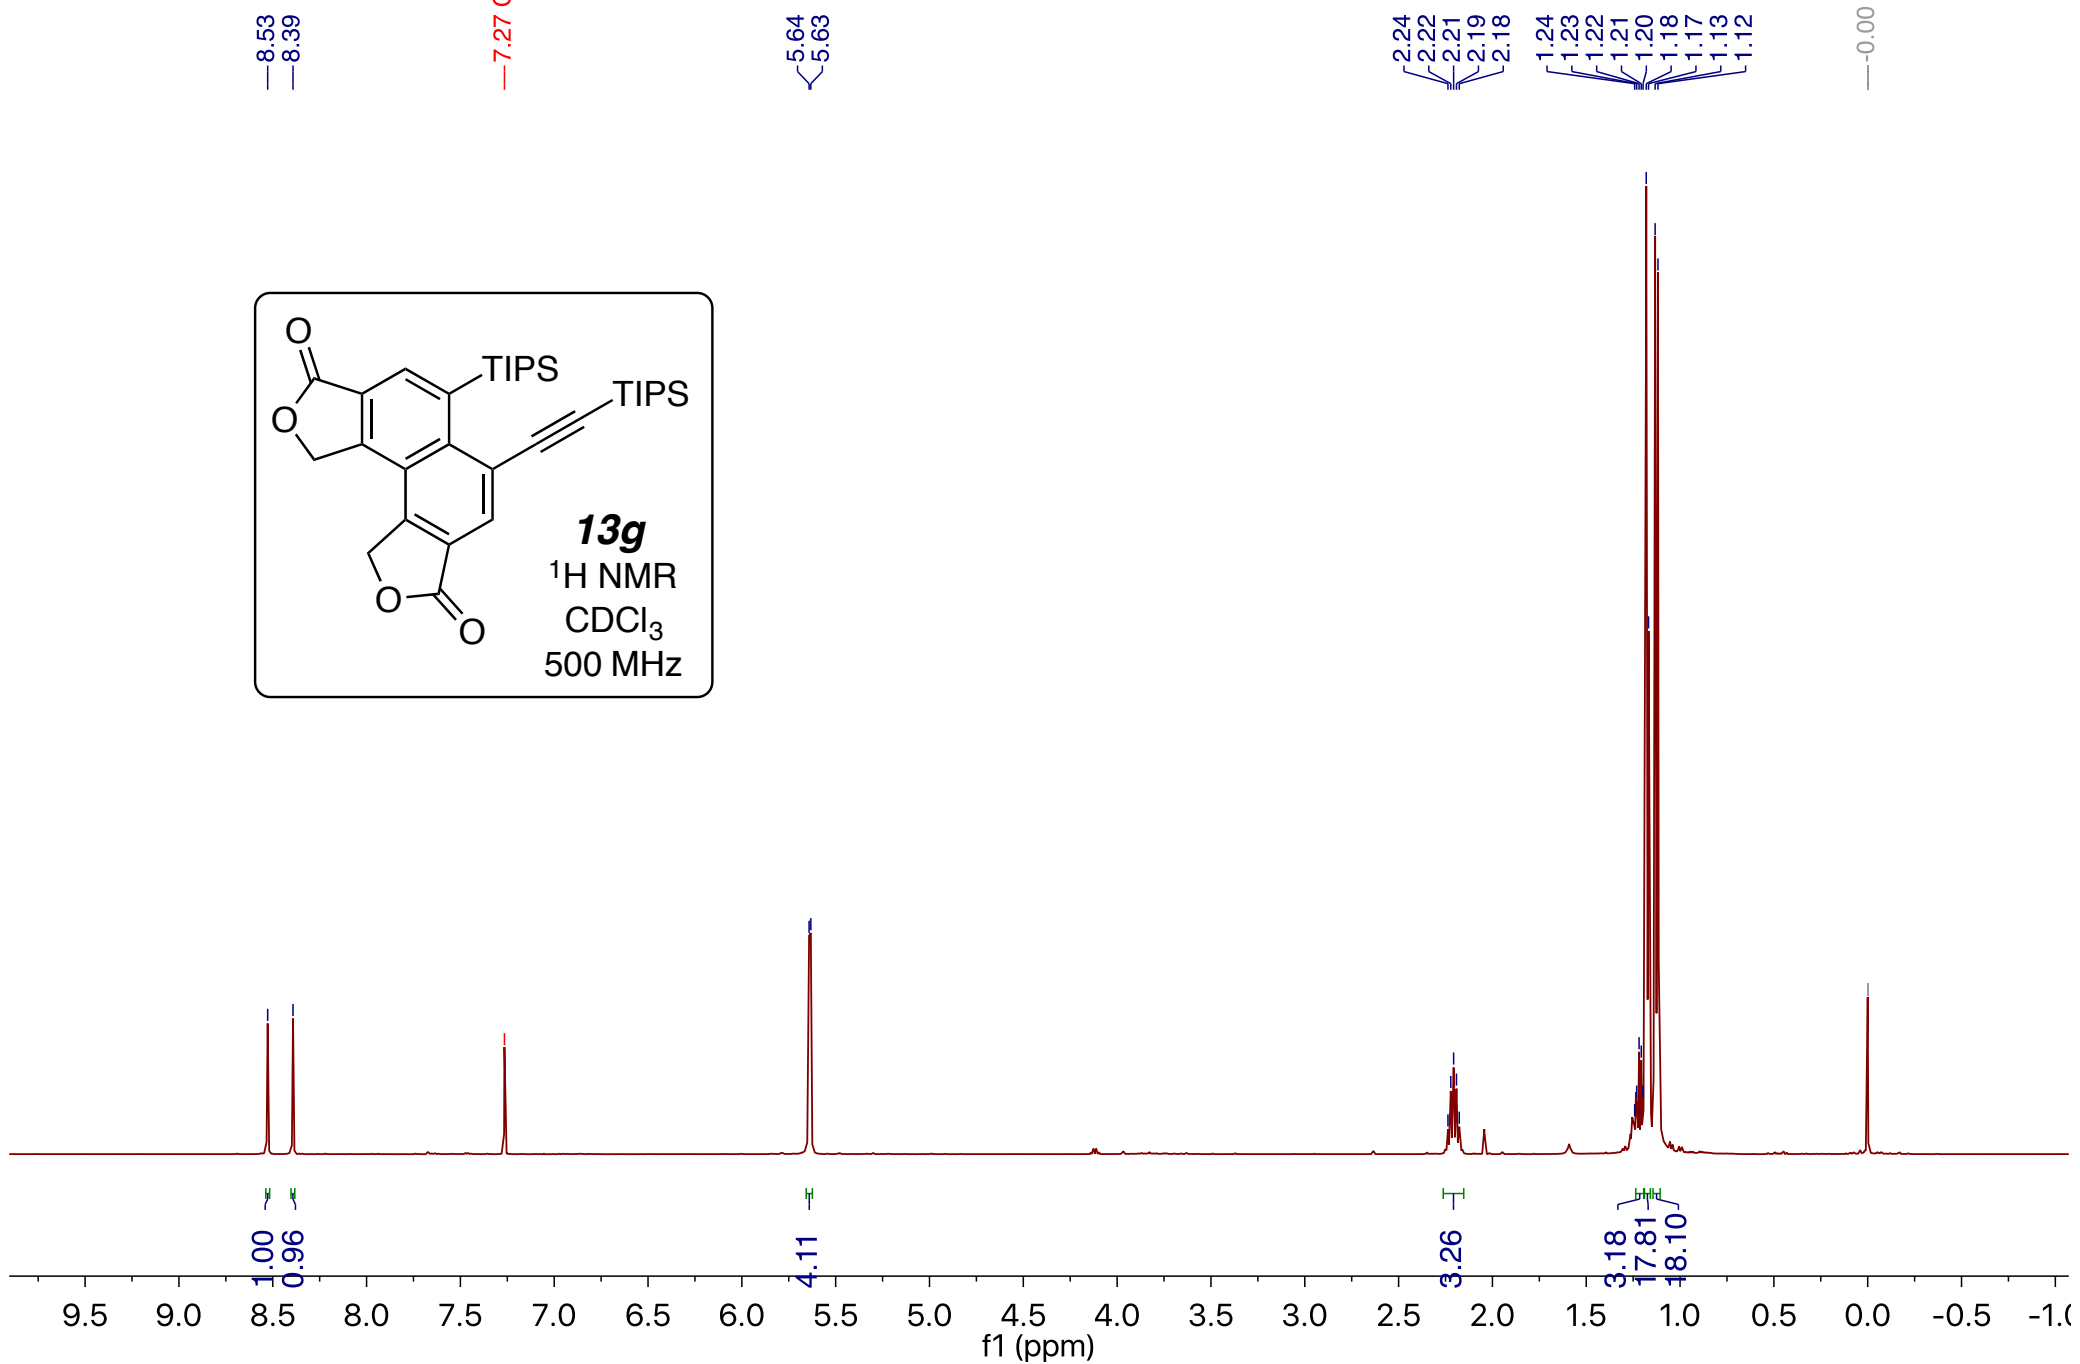

170.2  
169.5146.5  
145.9  
143.1  
140.8  
134.8  
134.2  
126.7  
123.7  
123.5  
123.2108.7  
105.477.4 CDCl<sub>3</sub>  
77.2 CDCl<sub>3</sub>  
76.9 CDCl<sub>3</sub>  
69.6  
69.320.0  
18.8  
14.6  
11.8

0.1

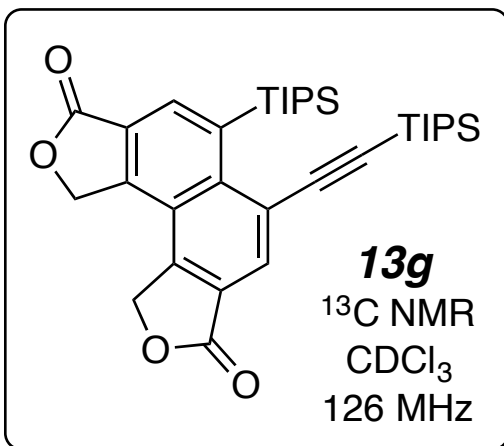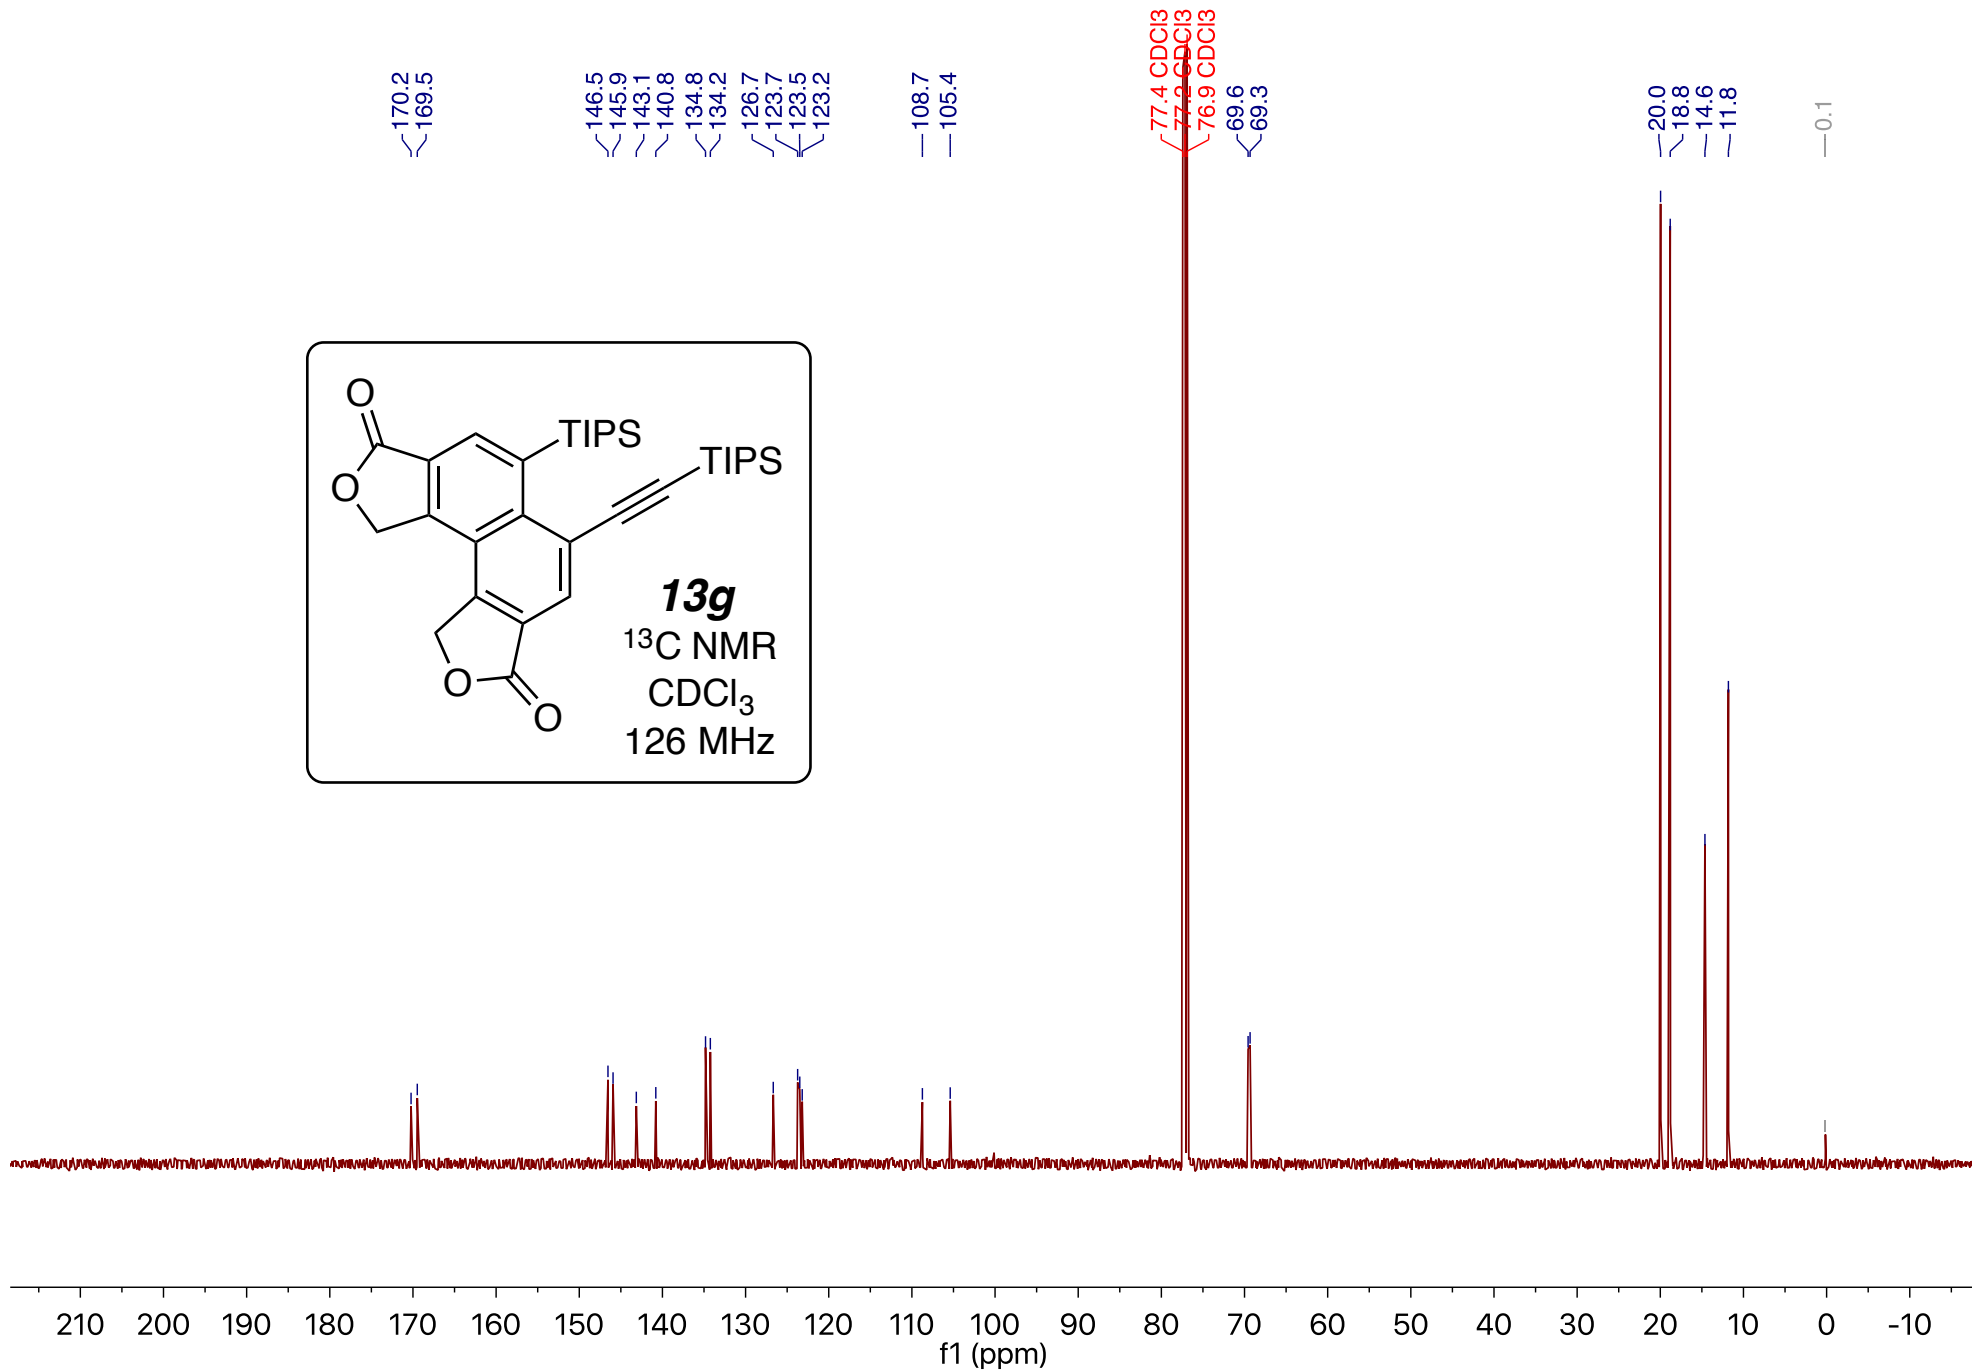



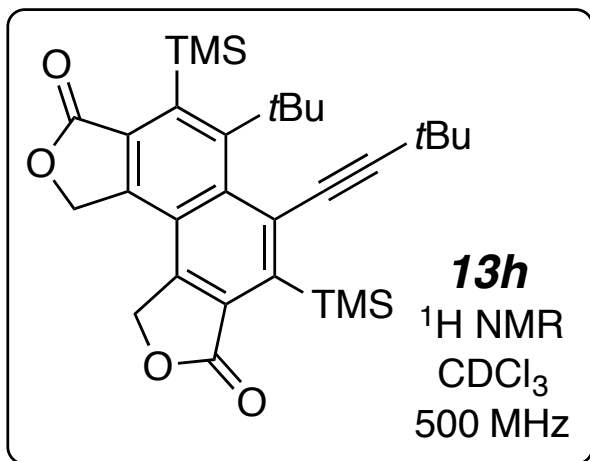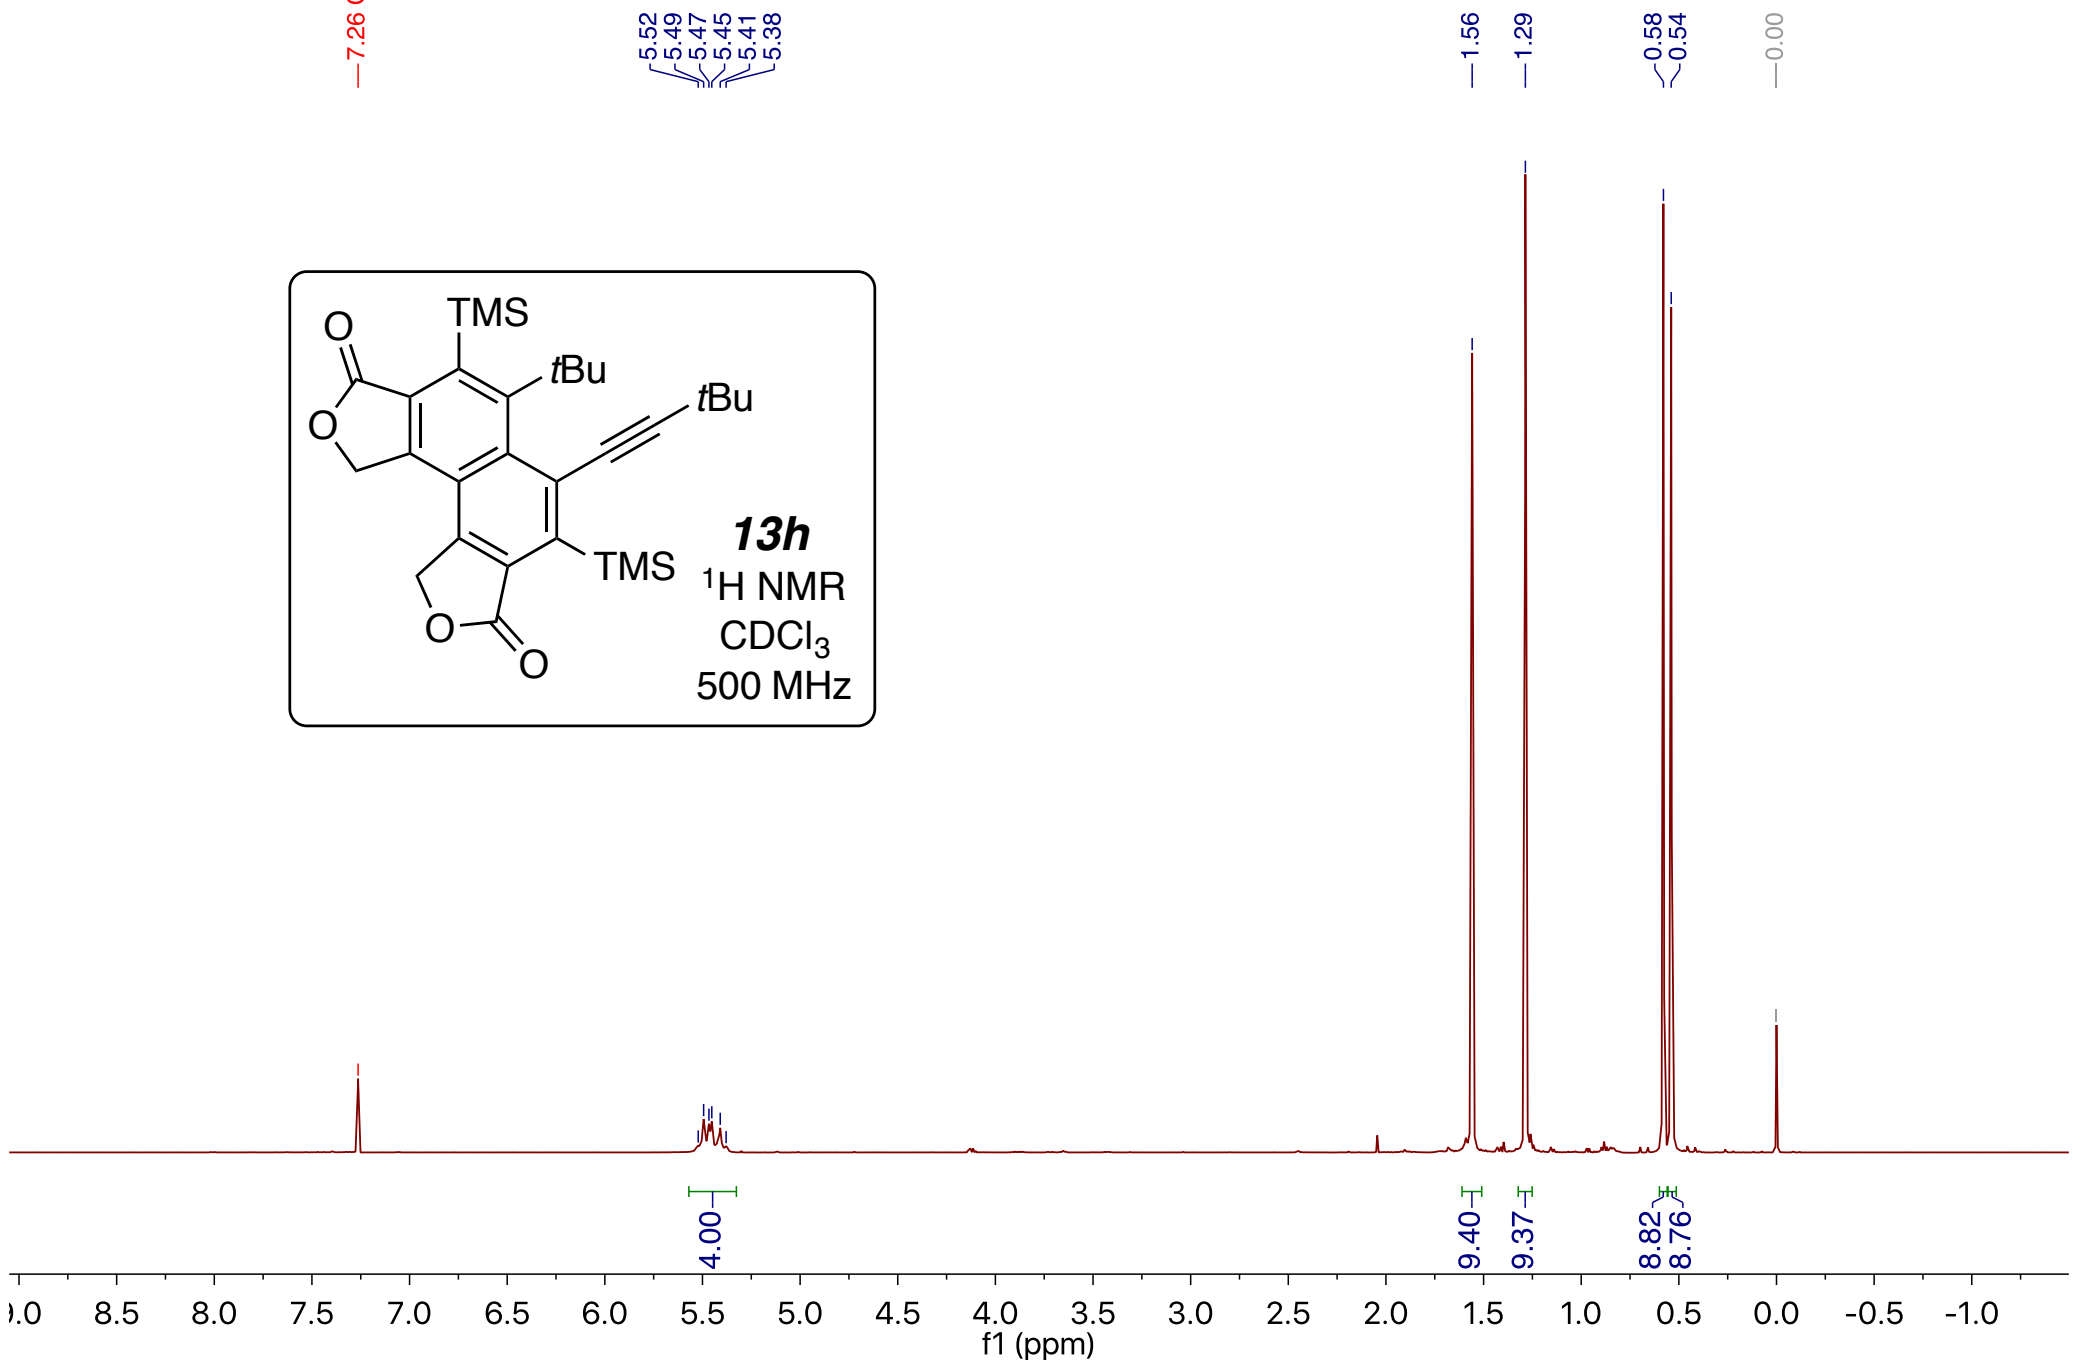

171.1  
170.5  
163.2

144.2  
143.0  
142.3  
141.3  
139.0  
132.2  
128.9  
127.3  
121.2  
115.5

84.8  
77.4 CDCl<sub>3</sub>  
77.0 CDCl<sub>3</sub>  
76.9 CDCl<sub>3</sub>  
68.6  
68.2

42.8  
36.6  
30.3  
29.0

4.6  
1.5  
0.1

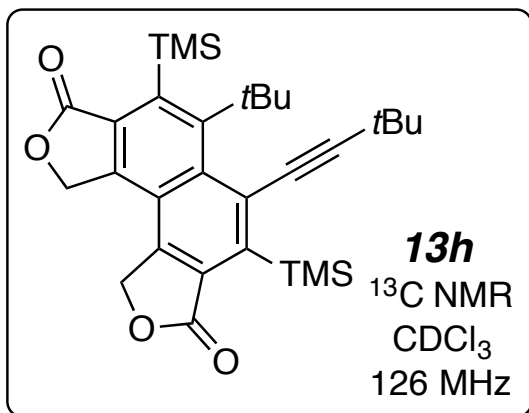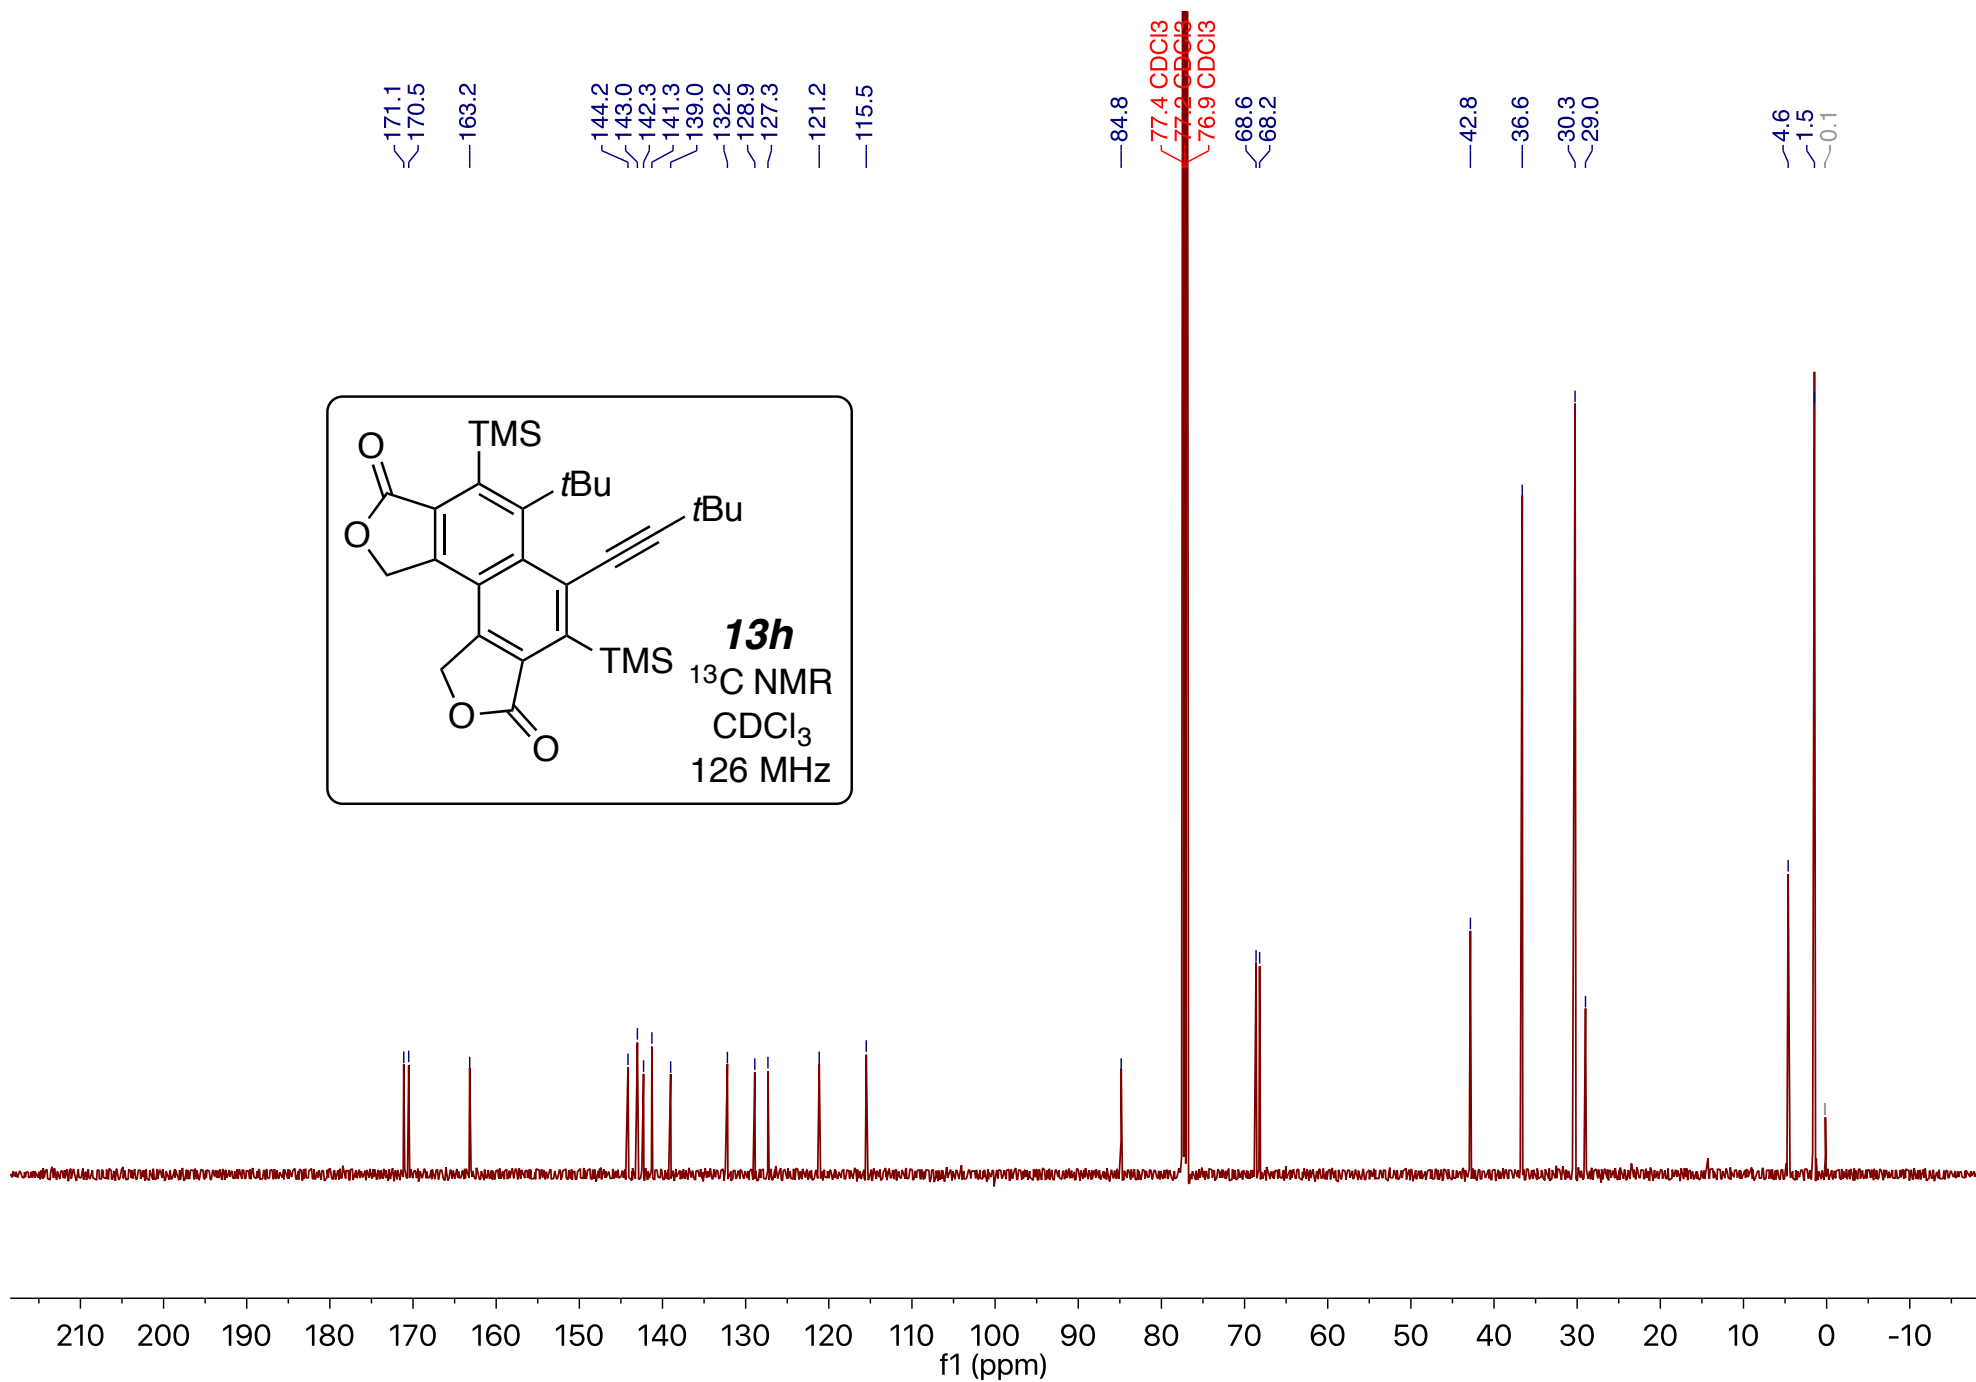

7.42  
7.40  
7.34  
7.33  
7.31  
7.26 CDCl<sub>3</sub>  
7.24  
7.24  
7.23  
7.22  
7.21  
7.05  
7.04  
7.03  
7.03

5.63  
5.61

0.48

-0.00  
-0.01

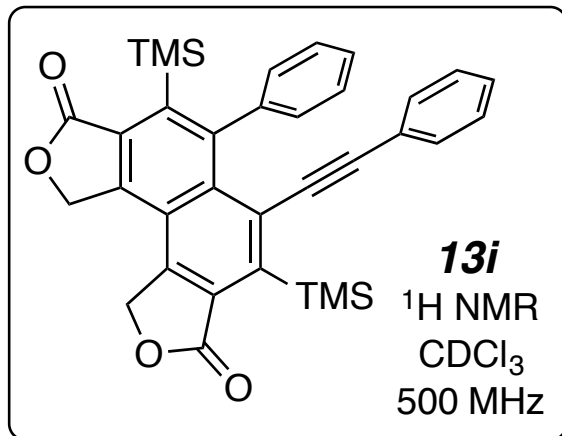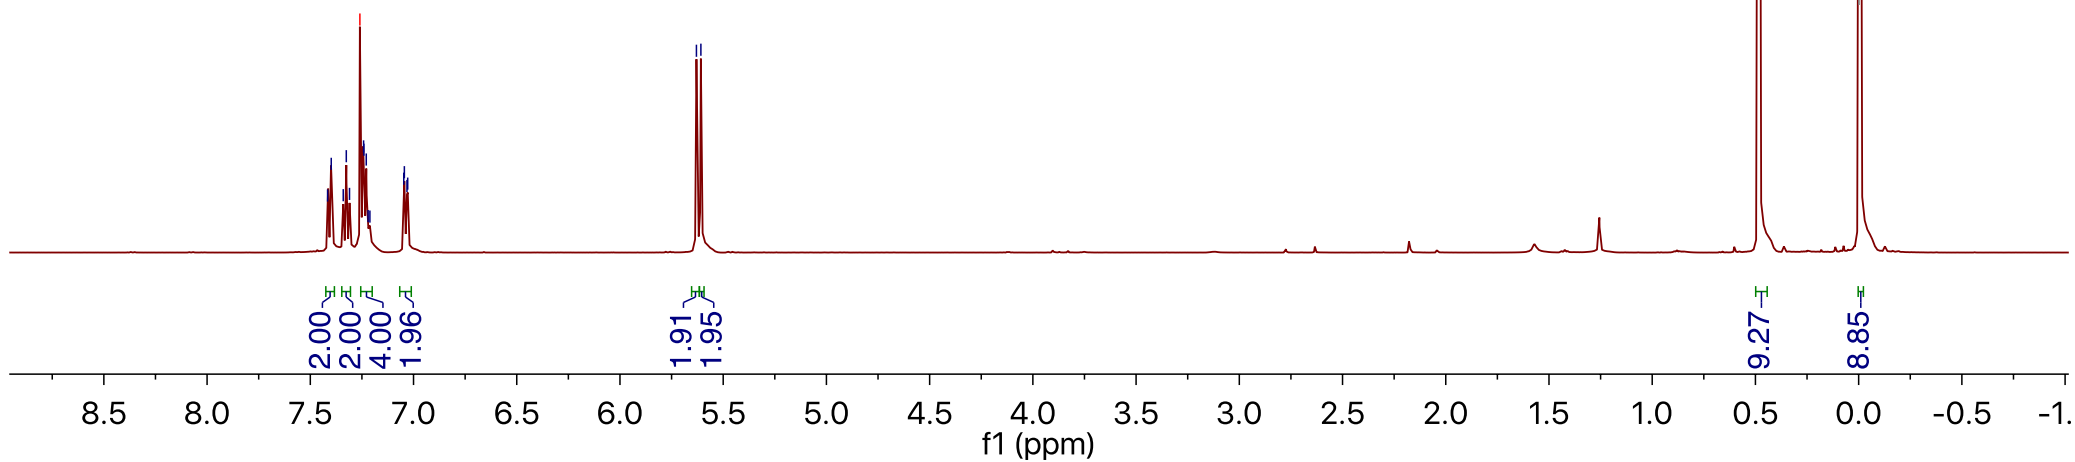

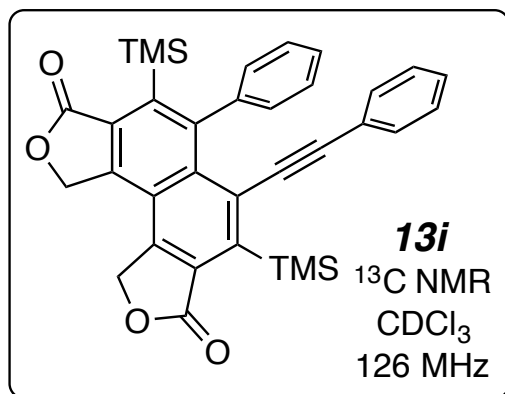

170.9  
170.2  
150.4  
147.2  
143.8  
143.3  
142.4  
141.4  
137.0  
133.0  
132.1  
131.0  
129.7  
129.0  
128.9  
128.6  
128.4  
128.1  
123.5  
122.8  
108.6

90.6

77.4  $\text{CDCl}_3$   
77.2  $\text{CDCl}_3$   
77.0  $\text{CDCl}_3$

76.9  $\text{CDCl}_3$   
68.8  
68.7

1.6  
1.5  
0.1

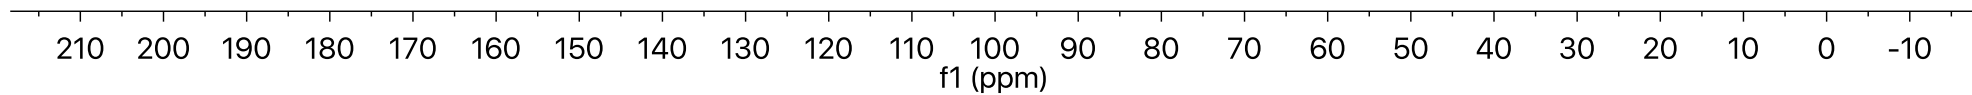

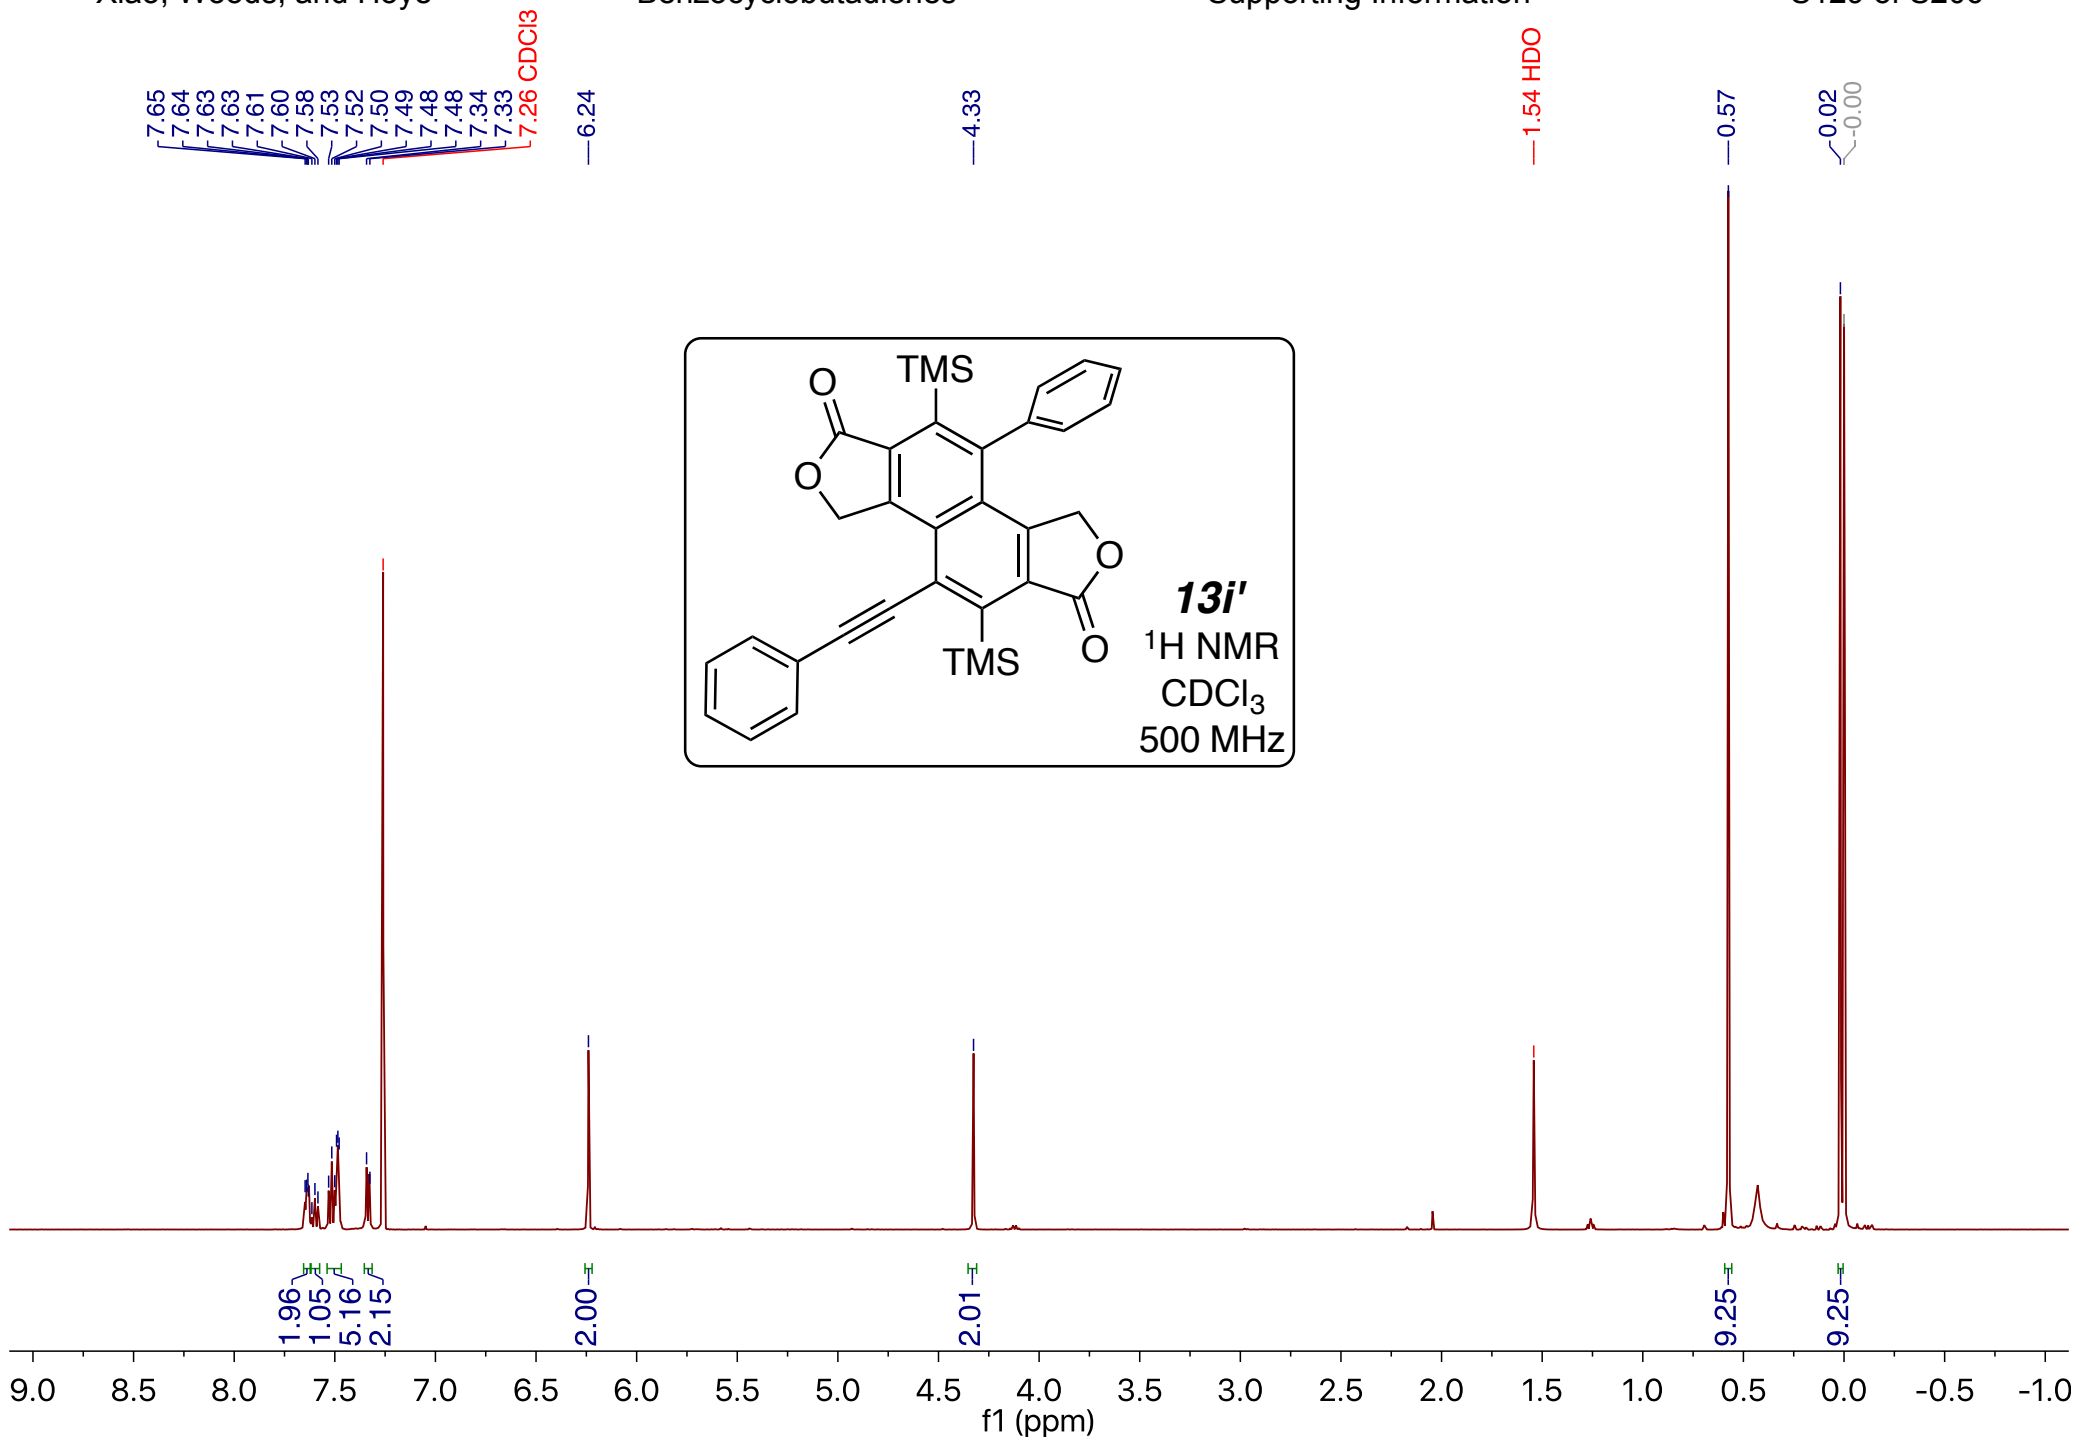

171.2  
170.6  
148.4  
146.7  
146.5  
143.7  
141.3  
132.1  
131.6  
131.5  
131.4  
131.3  
131.1  
130.6  
129.8  
129.8  
129.1  
128.8  
128.7  
122.9

100.1

91.1

77.4 CDCl<sub>3</sub>  
77.0 CDCl<sub>3</sub>  
76.9 CDCl<sub>3</sub>

71.6  
69.7

2.2  
1.6  
0.2

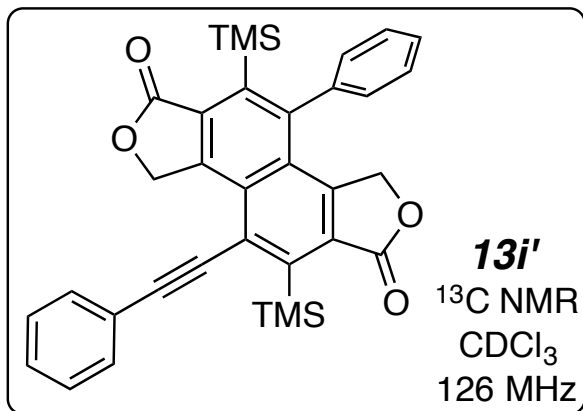

180 170 160 150 140 130 120 110 100 90 80 70 60 50 40 30 20 10 0 -10  
f1 (ppm)

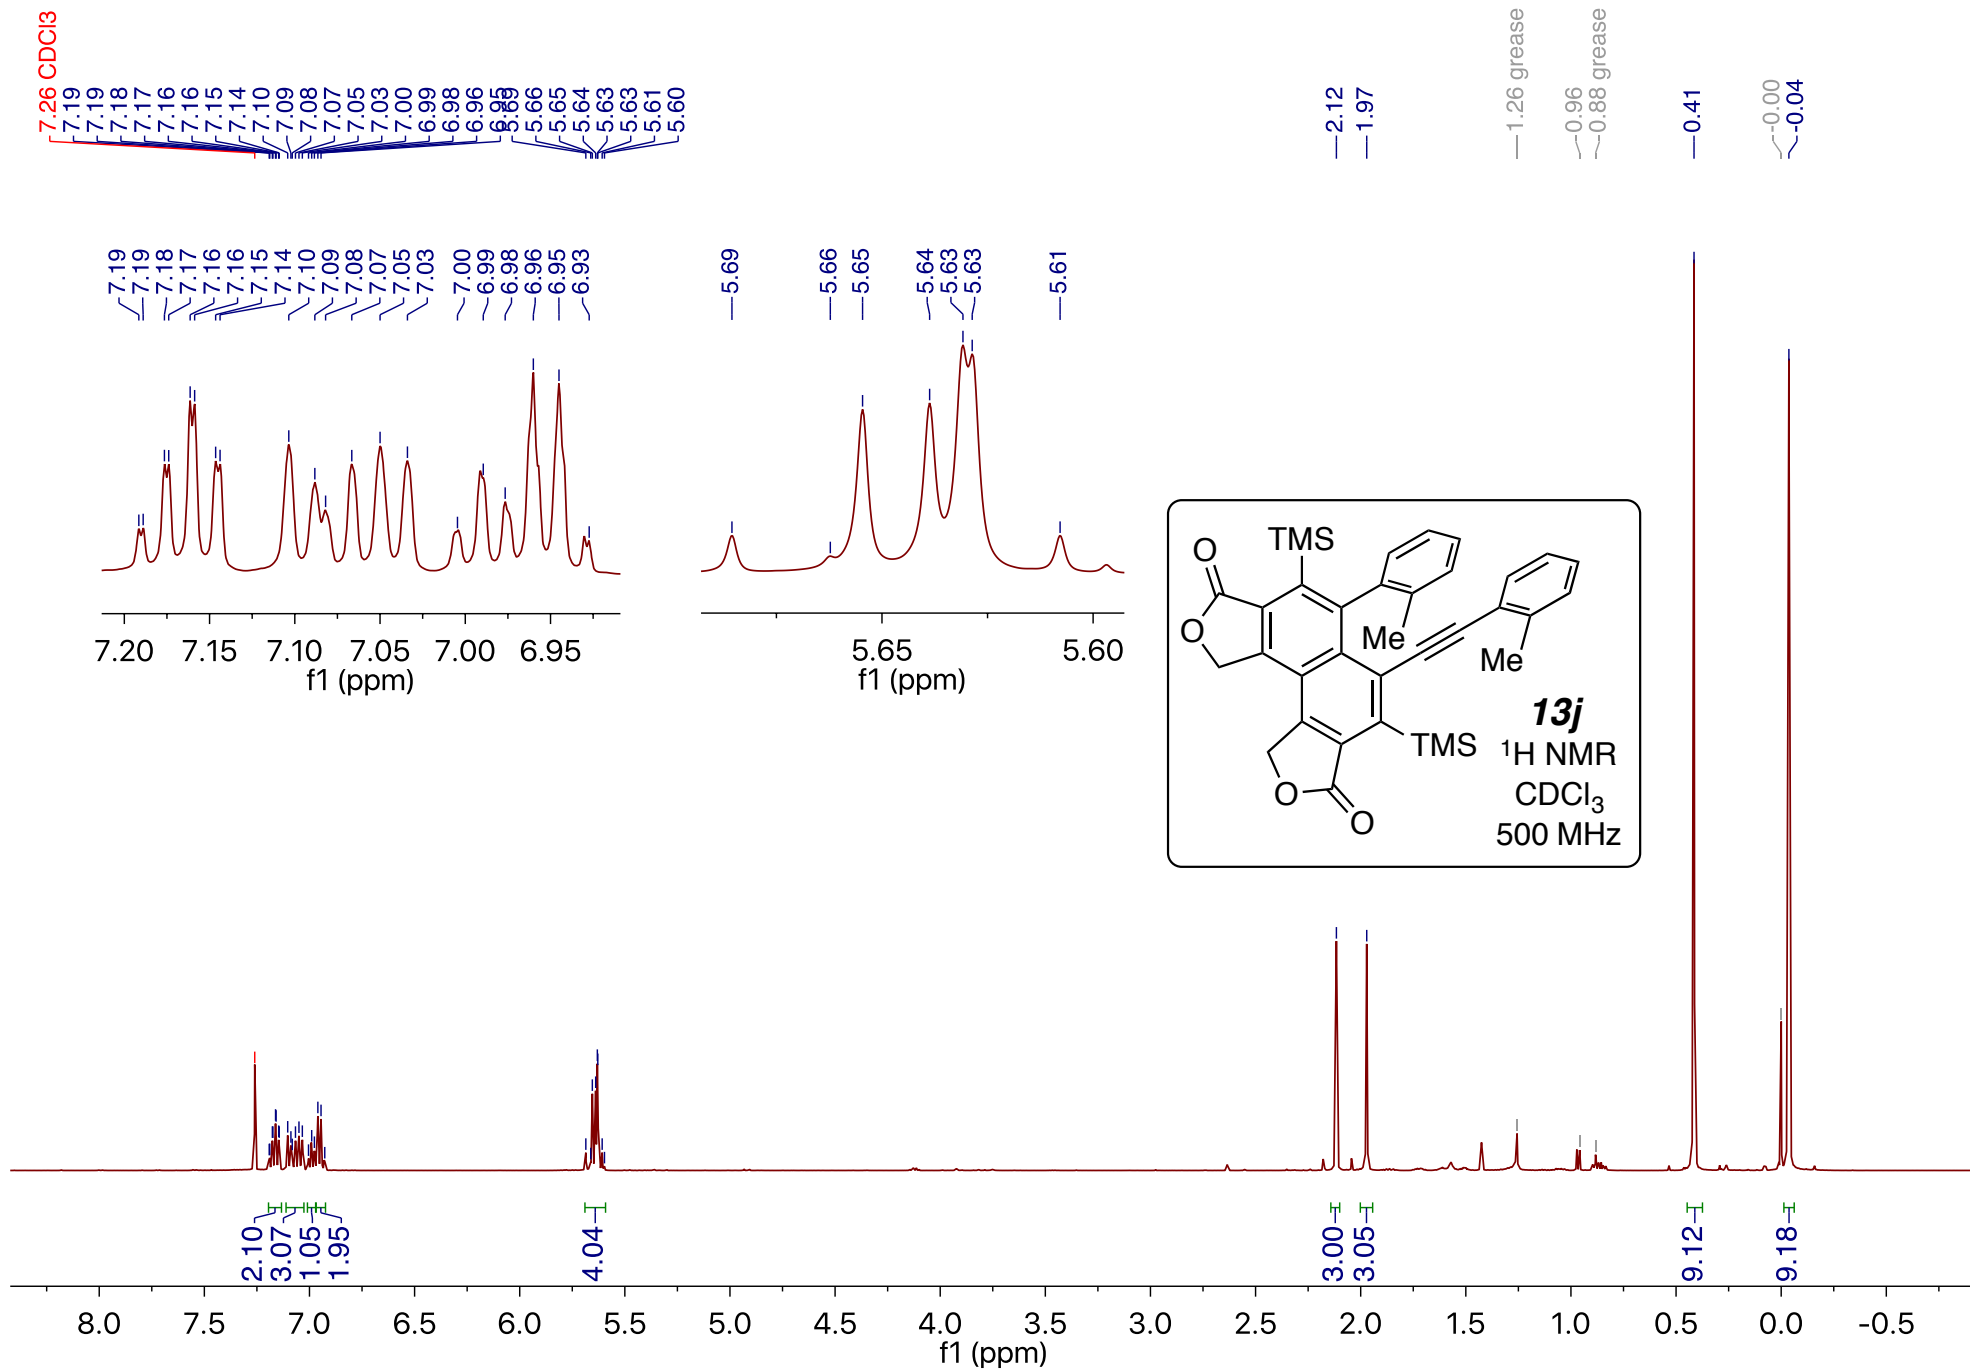

170.8  
170.2  
149.4  
147.4  
144.4  
143.7  
141.7  
141.2  
139.2  
138.3  
136.1  
132.4  
132.3  
131.4  
130.0  
129.7  
129.5  
129.4  
129.0  
128.3  
125.8  
125.1  
123.7  
122.7

—106.3

—92.7

77.4 CDCl<sub>3</sub>  
77.0 CDCl<sub>3</sub>  
76.9 CDCl<sub>3</sub>

68.8  
68.8

20.8  
20.6

1.6  
1.4  
0.1

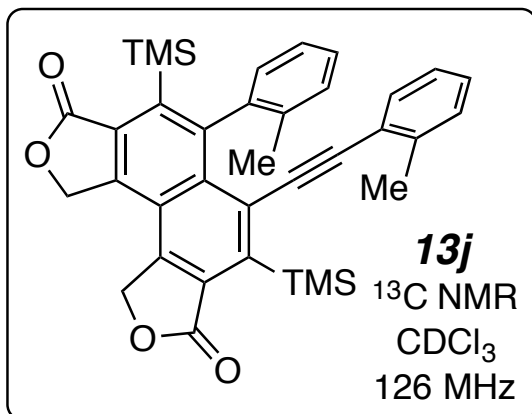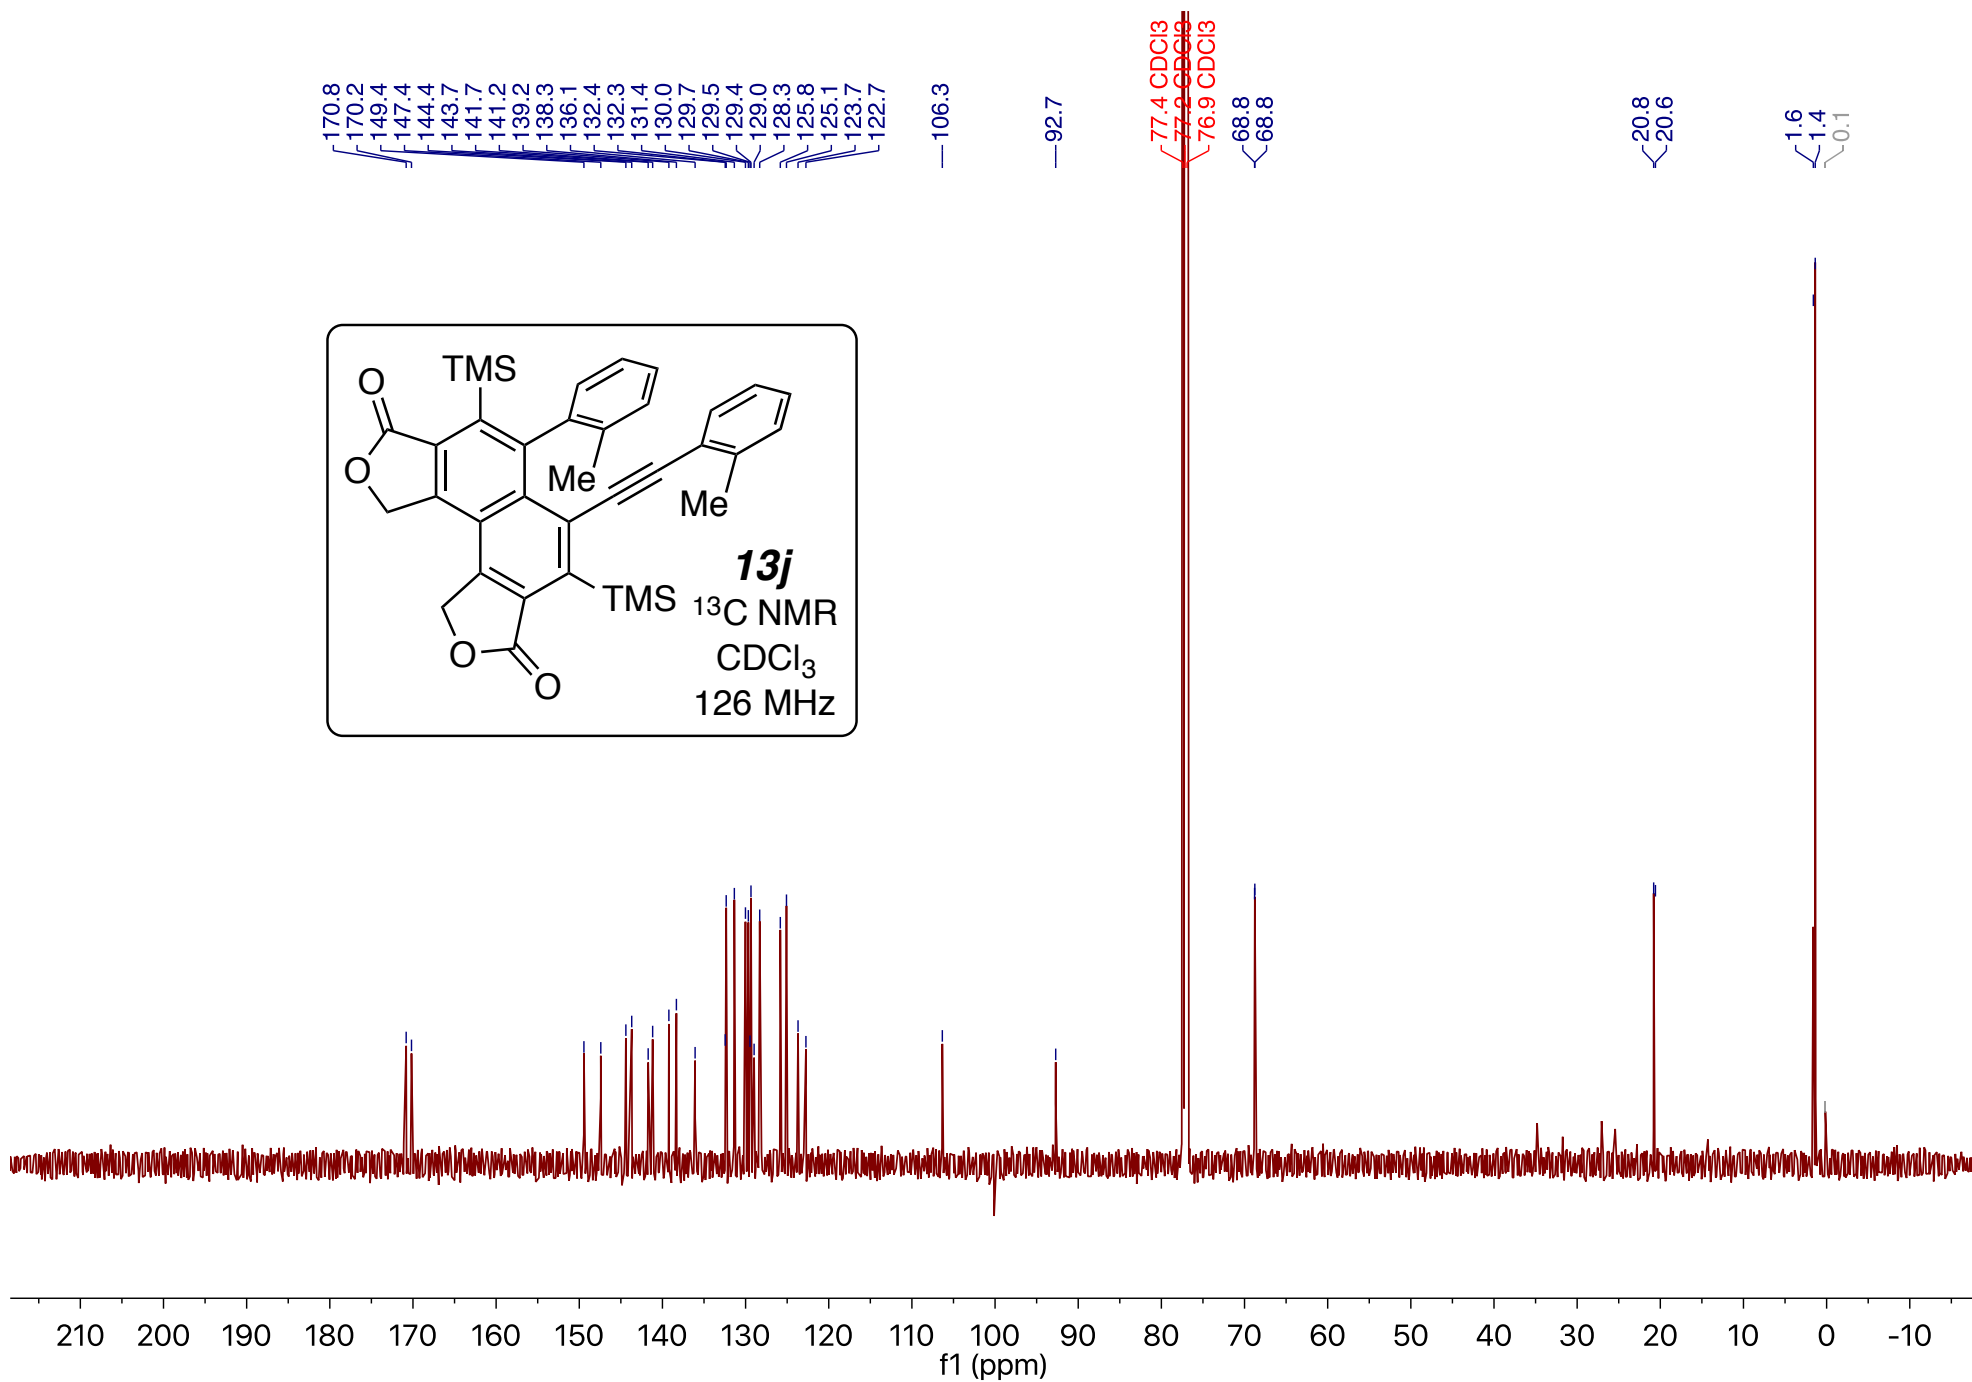



7.30  
7.29  
7.29  
7.28  
7.27  
7.27 CDCl<sub>3</sub>  
7.02  
7.01  
7.01  
7.00  
6.99  
6.99  
6.84  
6.83  
6.82  
6.81  
6.80  
6.79  
6.79  
6.78  
6.77  
6.62  
5.60

4.14  
4.13  
4.11 EtOAc  
4.10  
3.81  
3.65

2.04 EtOAc

1.27  
1.26 EtOAc  
1.24

0.47

0.02  
0.00

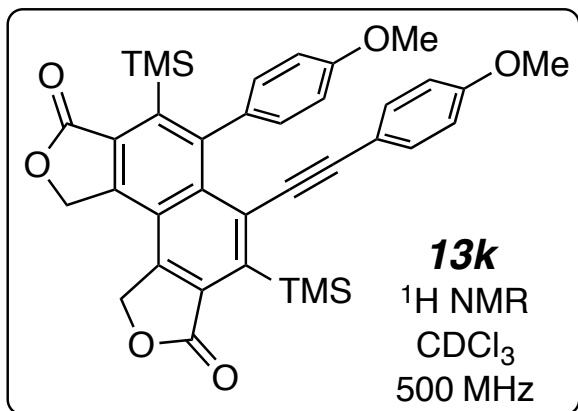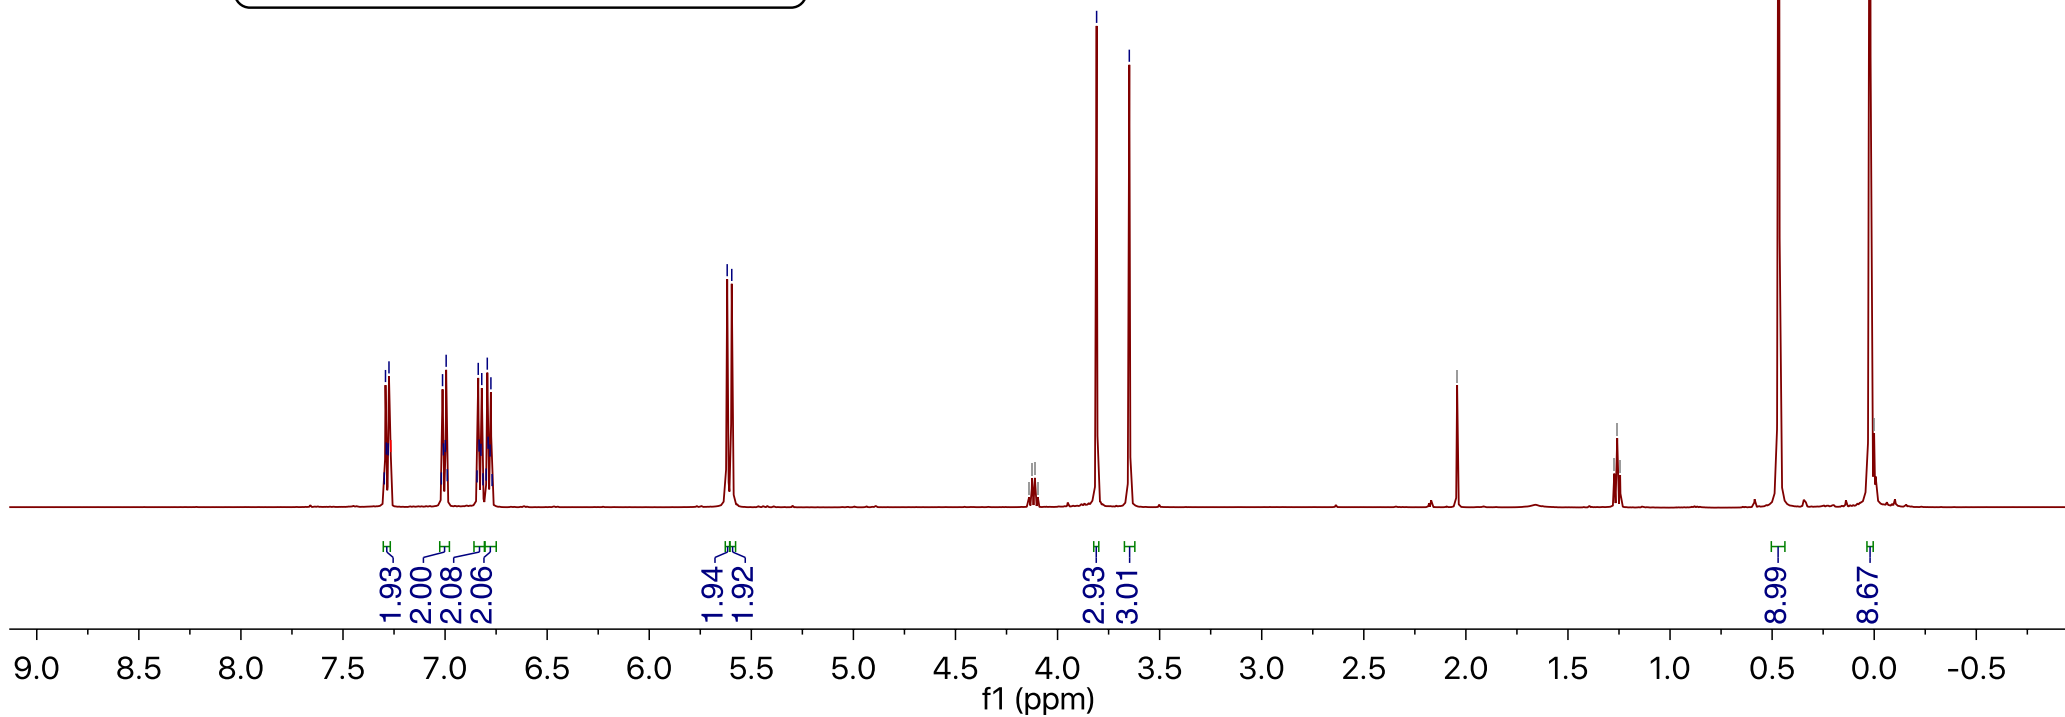

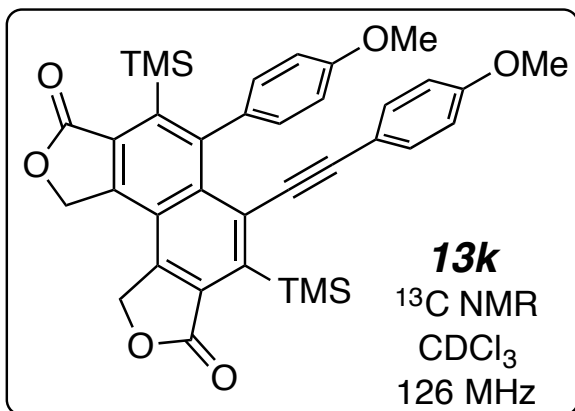

171.0

170.3

160.0

159.6

150.1

146.9

143.8

143.1

141.1

137.4

135.2

133.3

133.2

132.3

129.6

128.8

122.8

116.1

114.0

113.7

108.4

89.4

77.4  $\text{CDCl}_3$ 77.2  $\text{CDCl}_3$ 76.9  $\text{CDCl}_3$ 

68.9

68.7

60.5 EtOAc

55.4

55.2

21.2 EtOAc

14.3 EtOAc

1.7

1.5

210 200 190 180 170 160 150 140 130 120 110 100 90 80 70 60 50 40 30 20 10 0 -10  
f1 (ppm)

7.93  
7.92  
7.89  
7.88  
7.50  
7.49  
7.26 CDCl<sub>3</sub>  
7.04  
7.03

5.66  
5.63

4.14  
4.13  
4.11 EtOAc  
4.10  
3.93  
3.80

2.04 EtOAc

1.27  
1.26 EtOAc  
1.25

0.47

0.00  
-0.01

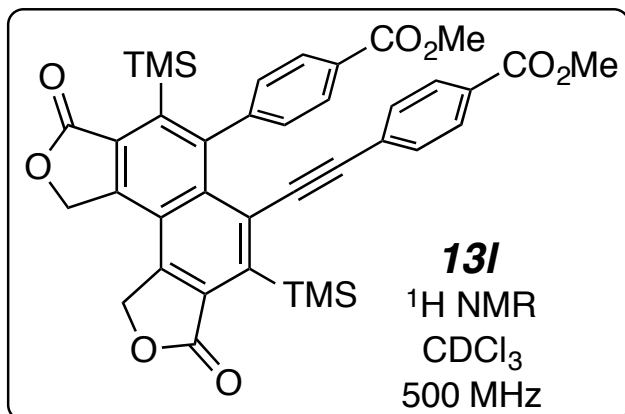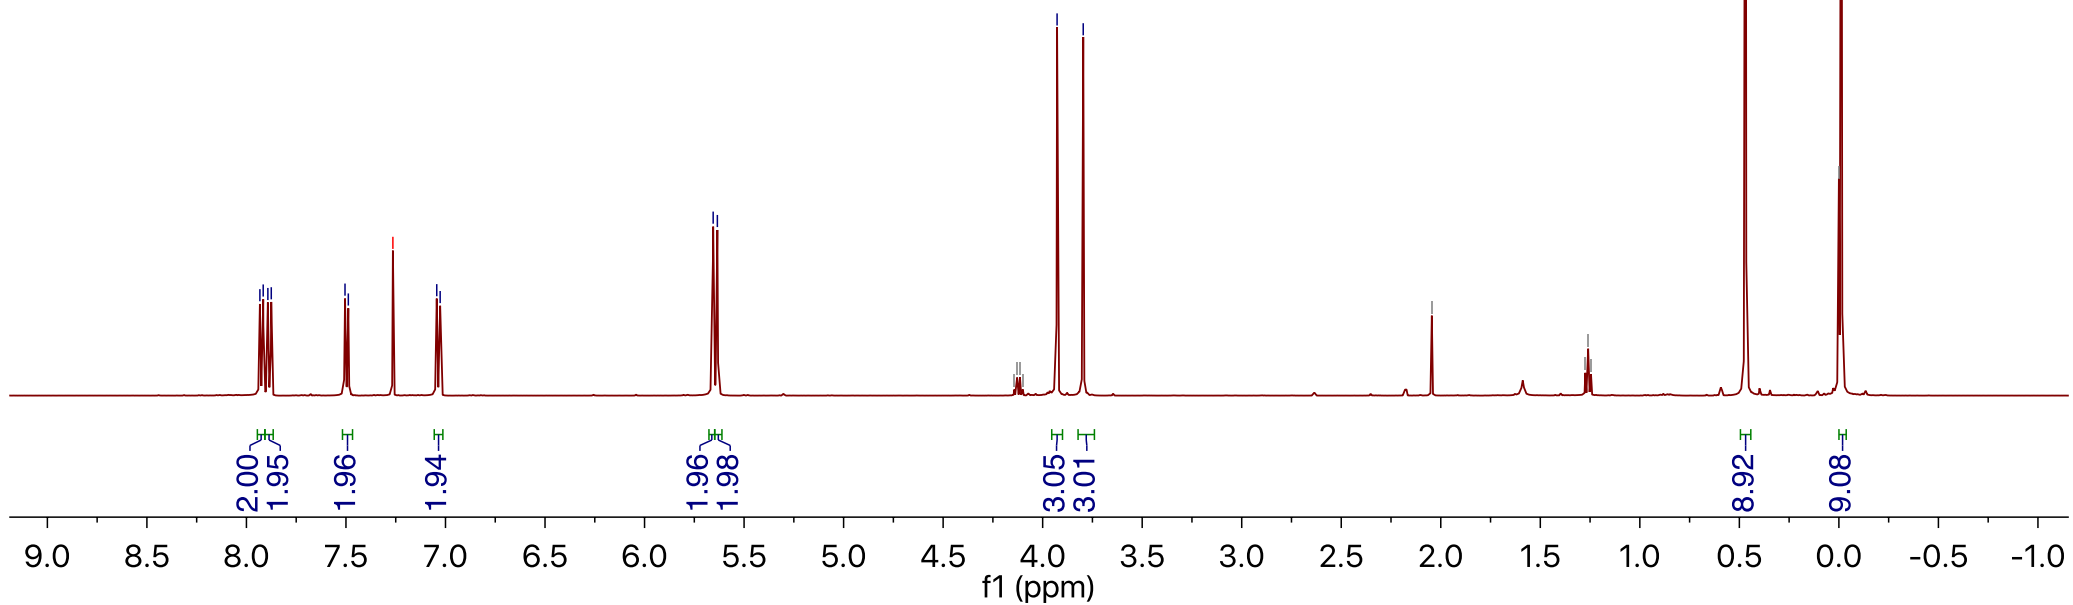

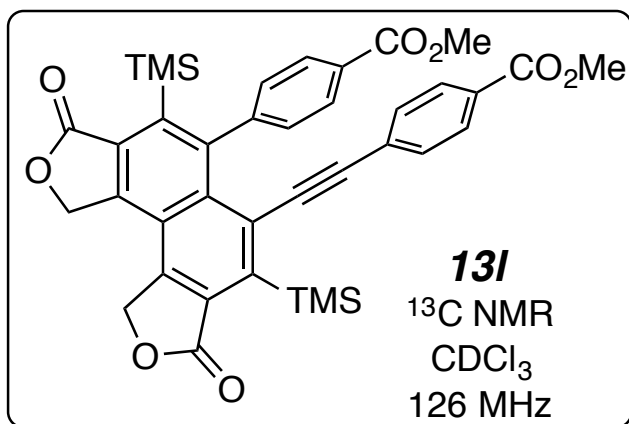

170.6  
169.9  
166.5  
166.4  
149.0  
148.2  
146.9  
144.4  
144.0  
142.0  
136.4  
132.2  
131.3  
130.6  
130.5  
129.8  
129.7  
129.6  
129.4  
129.2  
127.9  
122.9  
106.3

93.1

77.4 CDCl<sub>3</sub>  
77.2 CDCl<sub>3</sub>  
76.9 CDCl<sub>3</sub>

68.8  
68.7

60.5 EtOAc

52.4  
52.2

14.3 EtOAc

1.7  
1.7  
0.1

210 200 190 180 170 160 150 140 130 120 110 100 90 80 70 60 50 40 30 20 10 0 -10  
f1 (ppm)

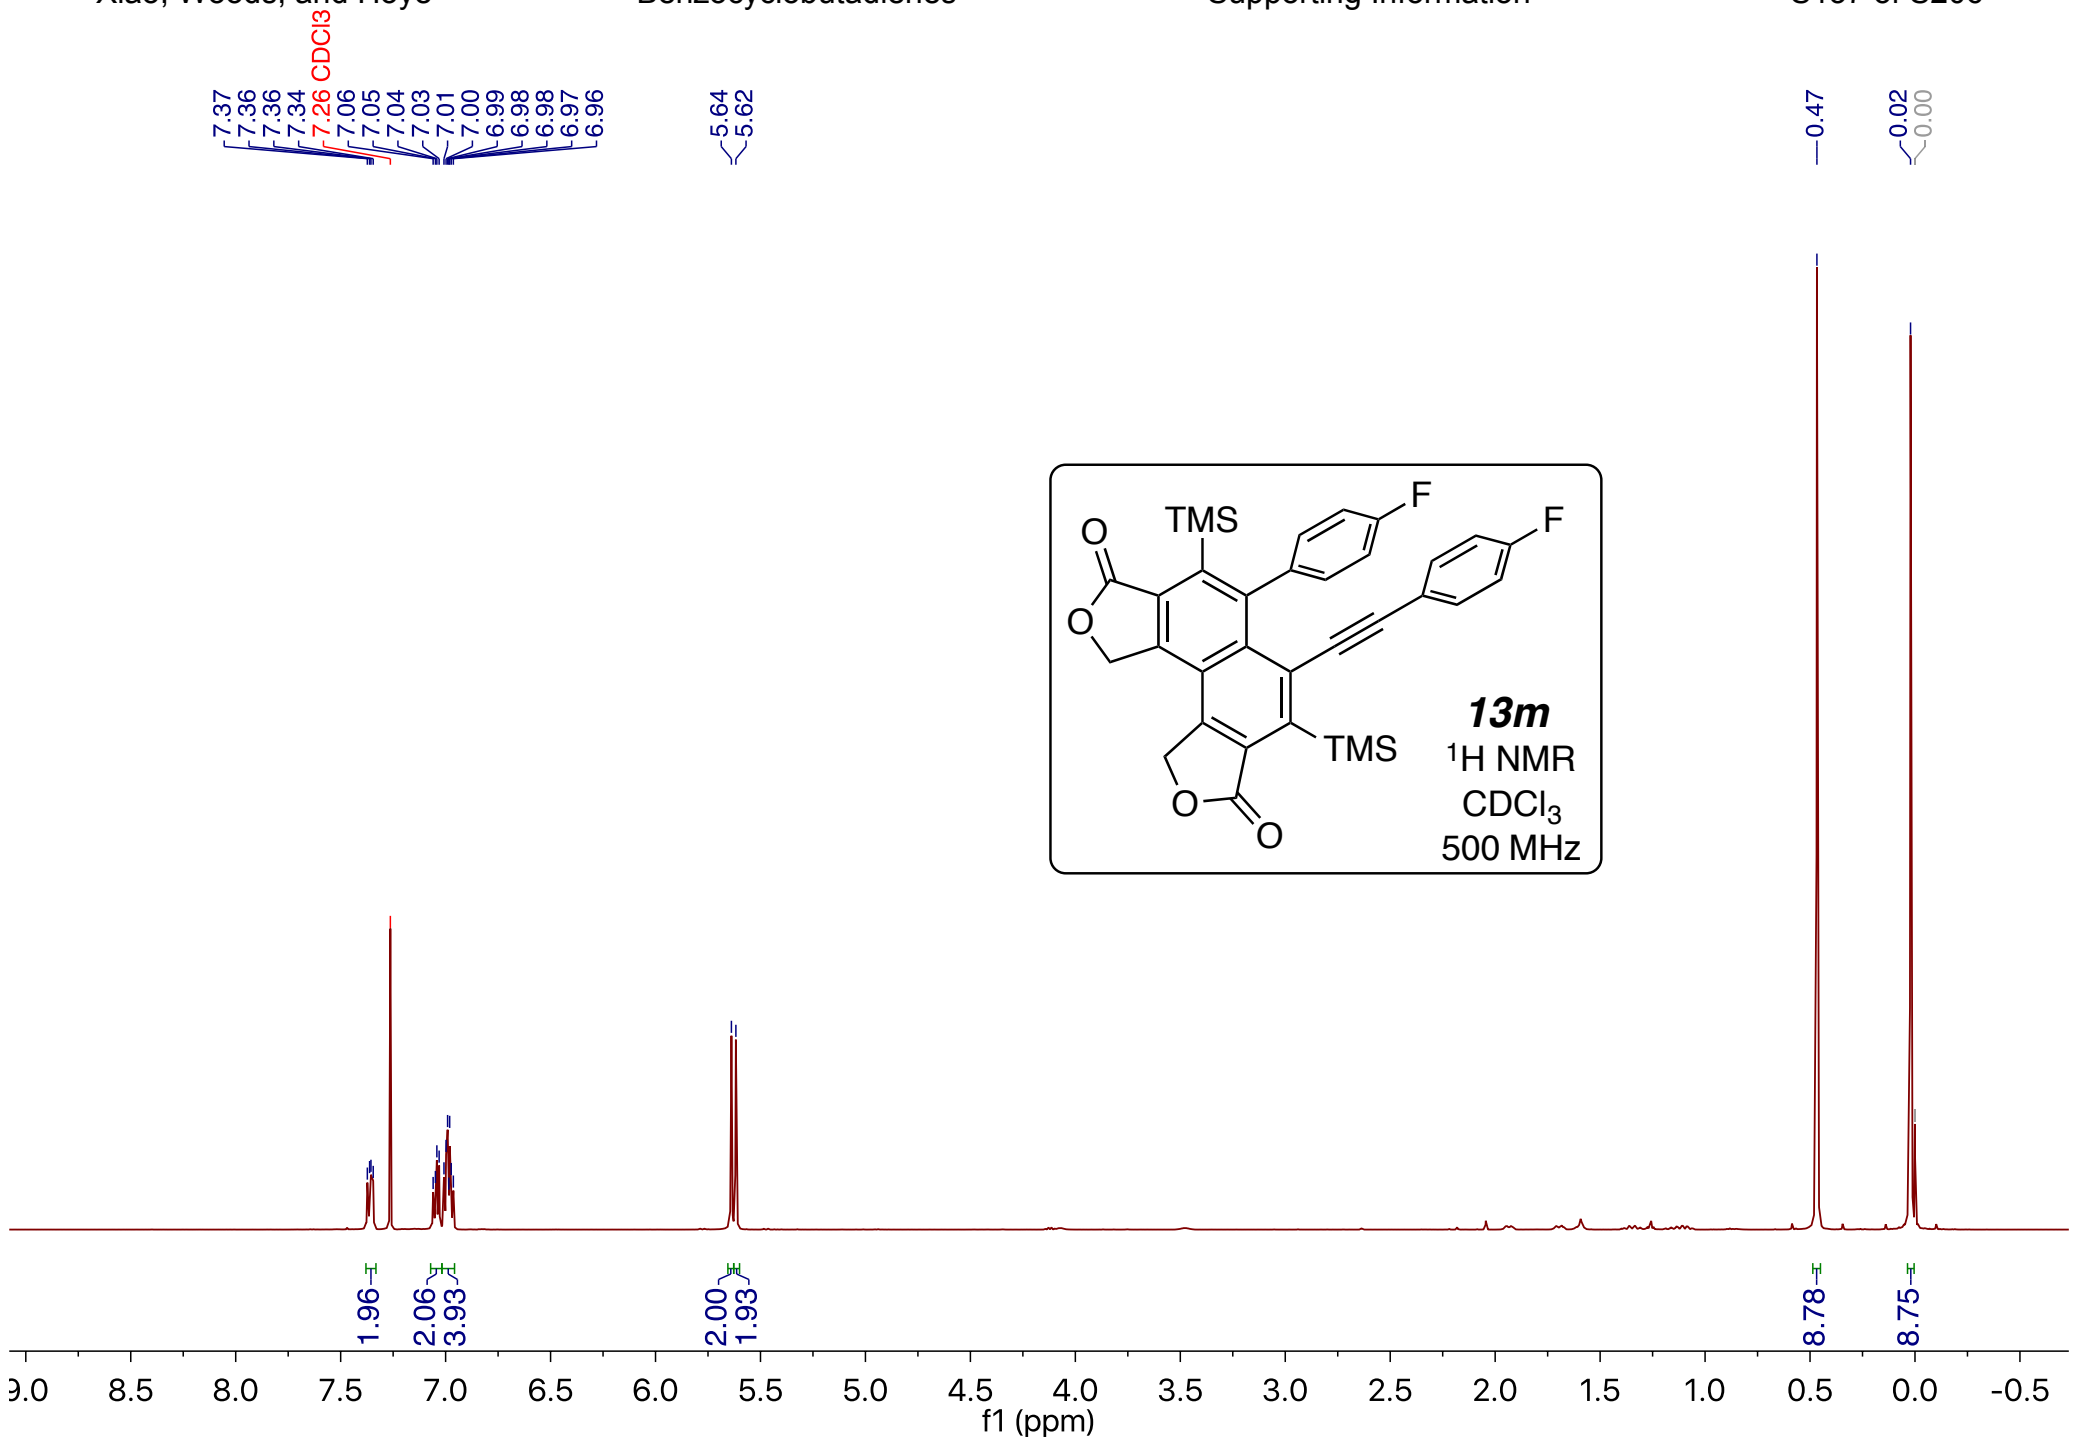

170.8  
170.1  
164.2  
163.6  
162.2  
161.6  
149.0  
147.7  
144.1  
143.6  
141.7  
138.7  
137.1  
133.8  
133.7  
132.6  
132.6  
132.3  
129.7  
129.1  
122.9  
119.5  
119.5  
115.8  
115.7  
115.6  
115.5  
107.0  
89.9  
89.9

77.4 CDCl<sub>3</sub>  
77.0 CDCl<sub>3</sub>  
76.9 CDCl<sub>3</sub>

68.8  
68.7

—34.1

25.8  
25.1

1.7  
1.5  
0.1

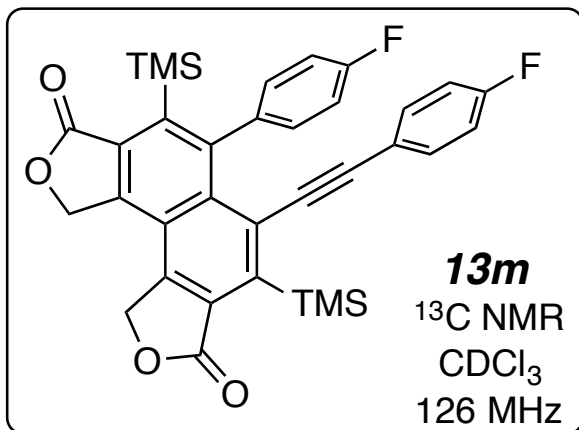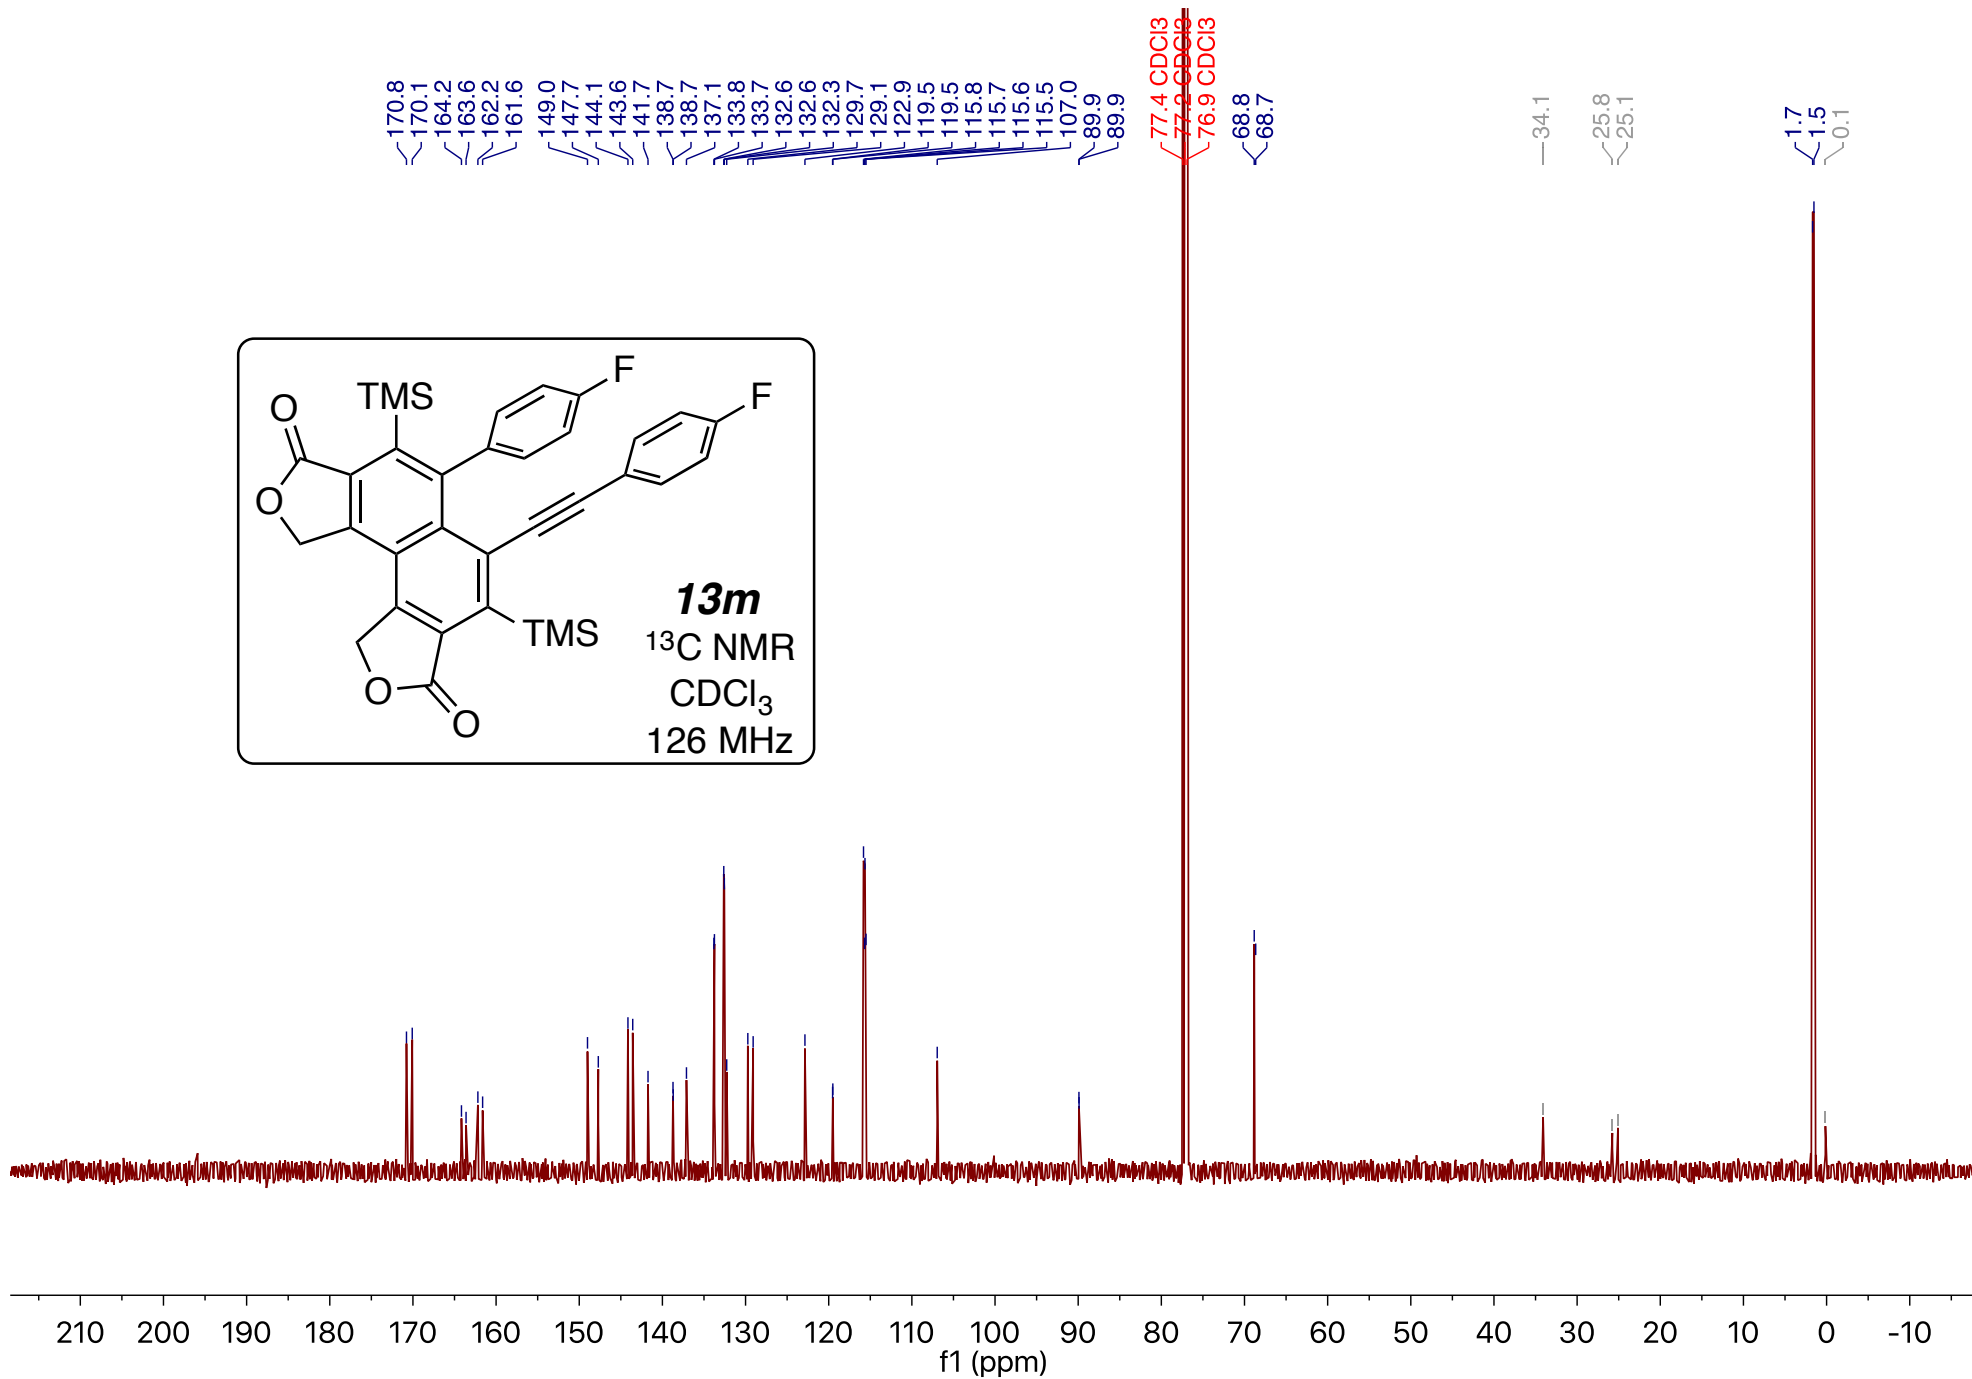

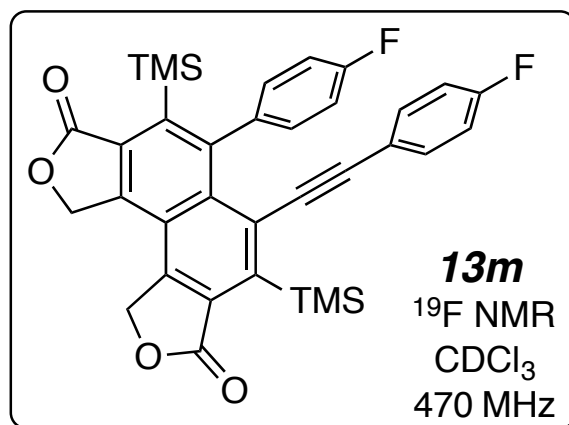

-110.3  
-113.1

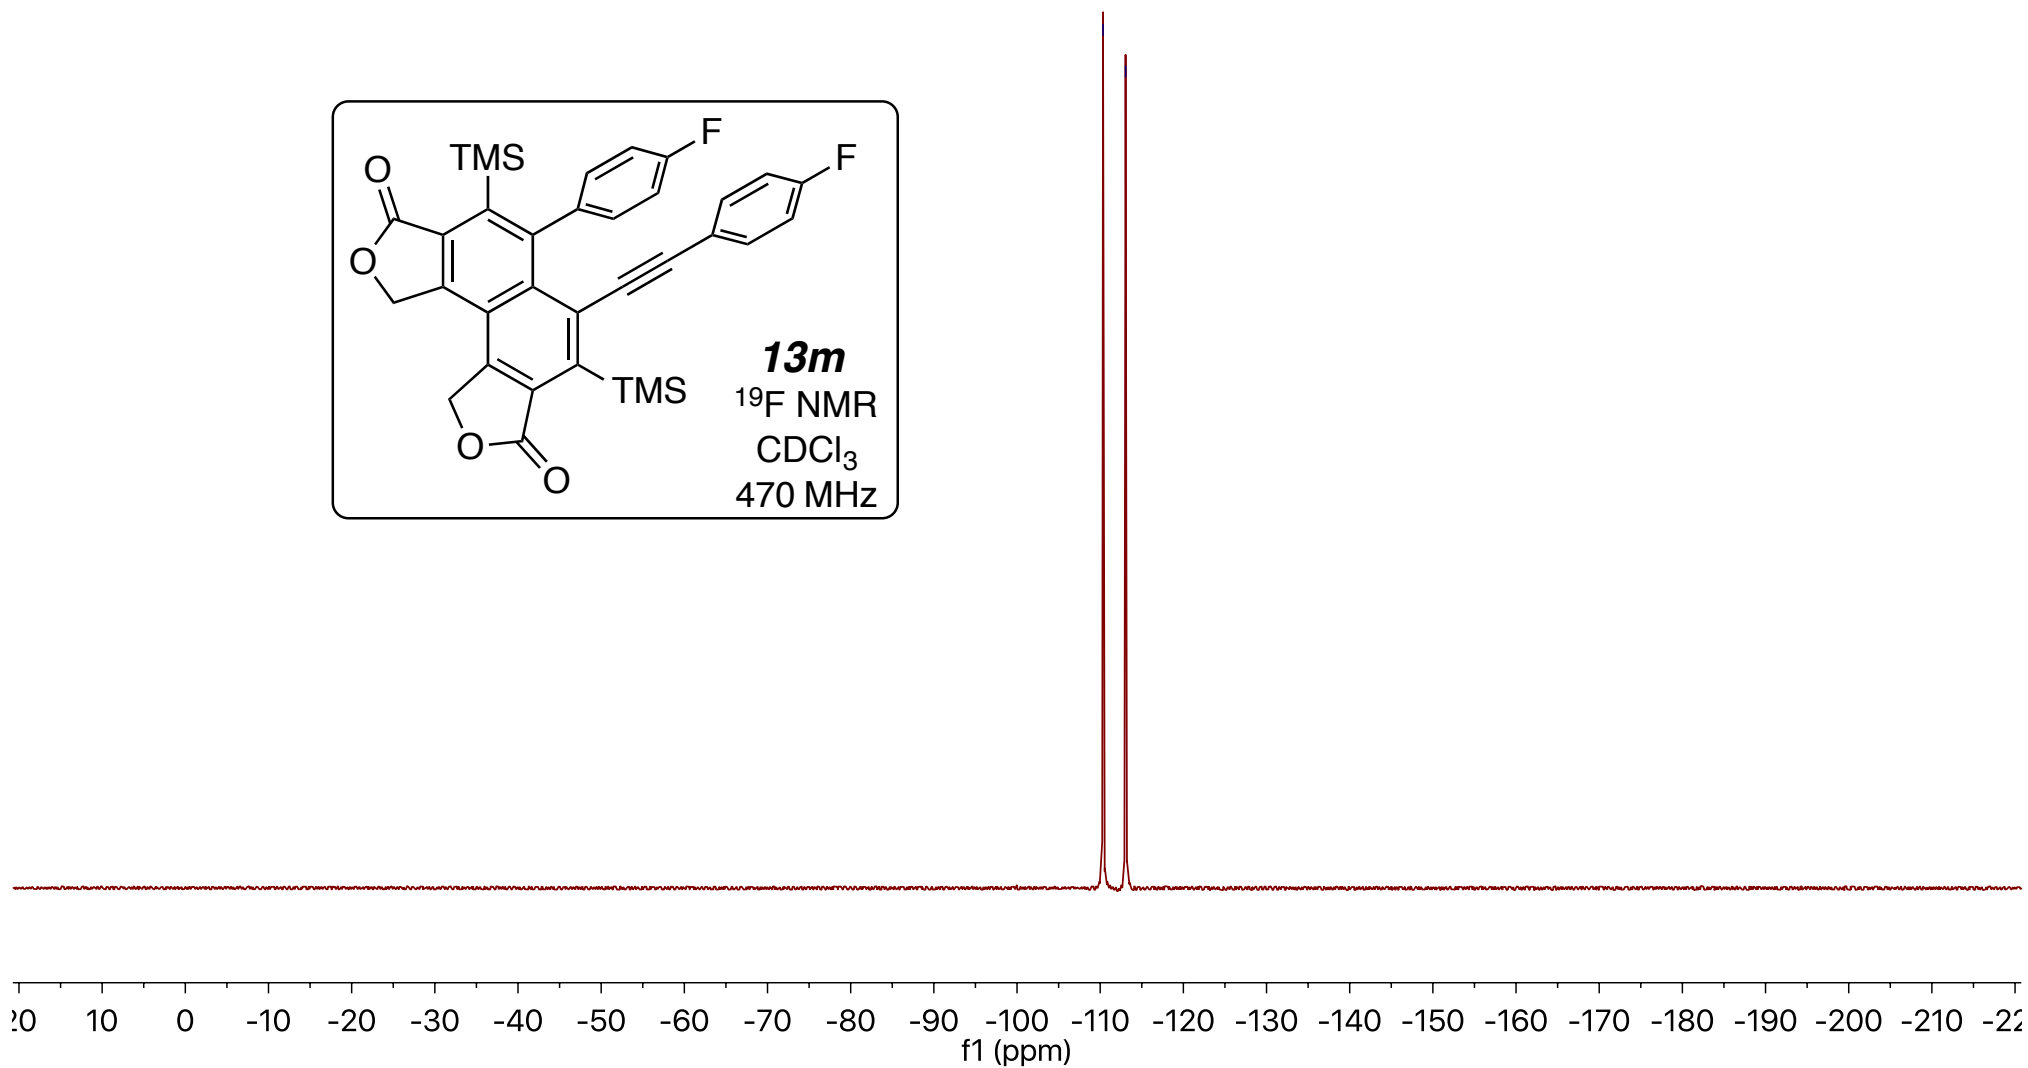

7.46  
7.44  
7.43  
7.42  
7.27  
7.26 CDCl<sub>3</sub>  
7.25  
6.93  
6.91

5.64  
5.62

0.46

0.02  
0.00

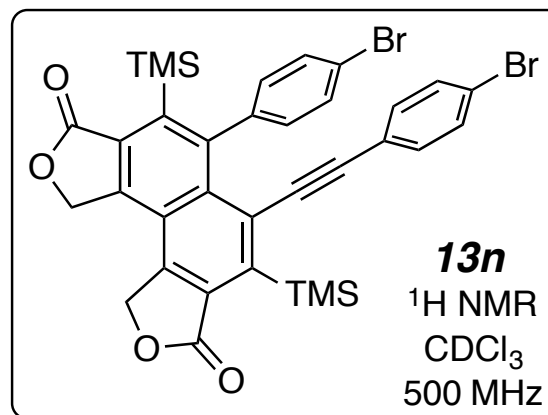

4.02

2.47

2.00

1.96

1.95

9.10

8.87

8.5 8.0 7.5 7.0 6.5 6.0 5.5 5.0 4.5 4.0 3.5 3.0 2.5 2.0 1.5 1.0 0.5 0.0 -0.5 -1.0 -1.5  
f1 (ppm)



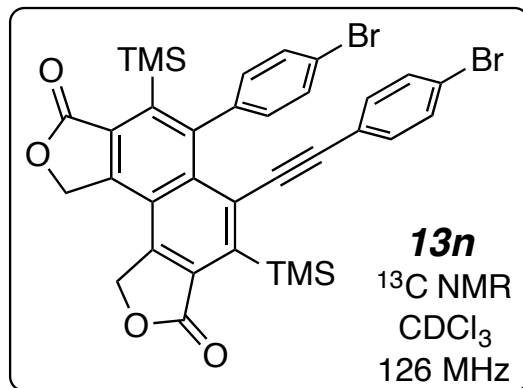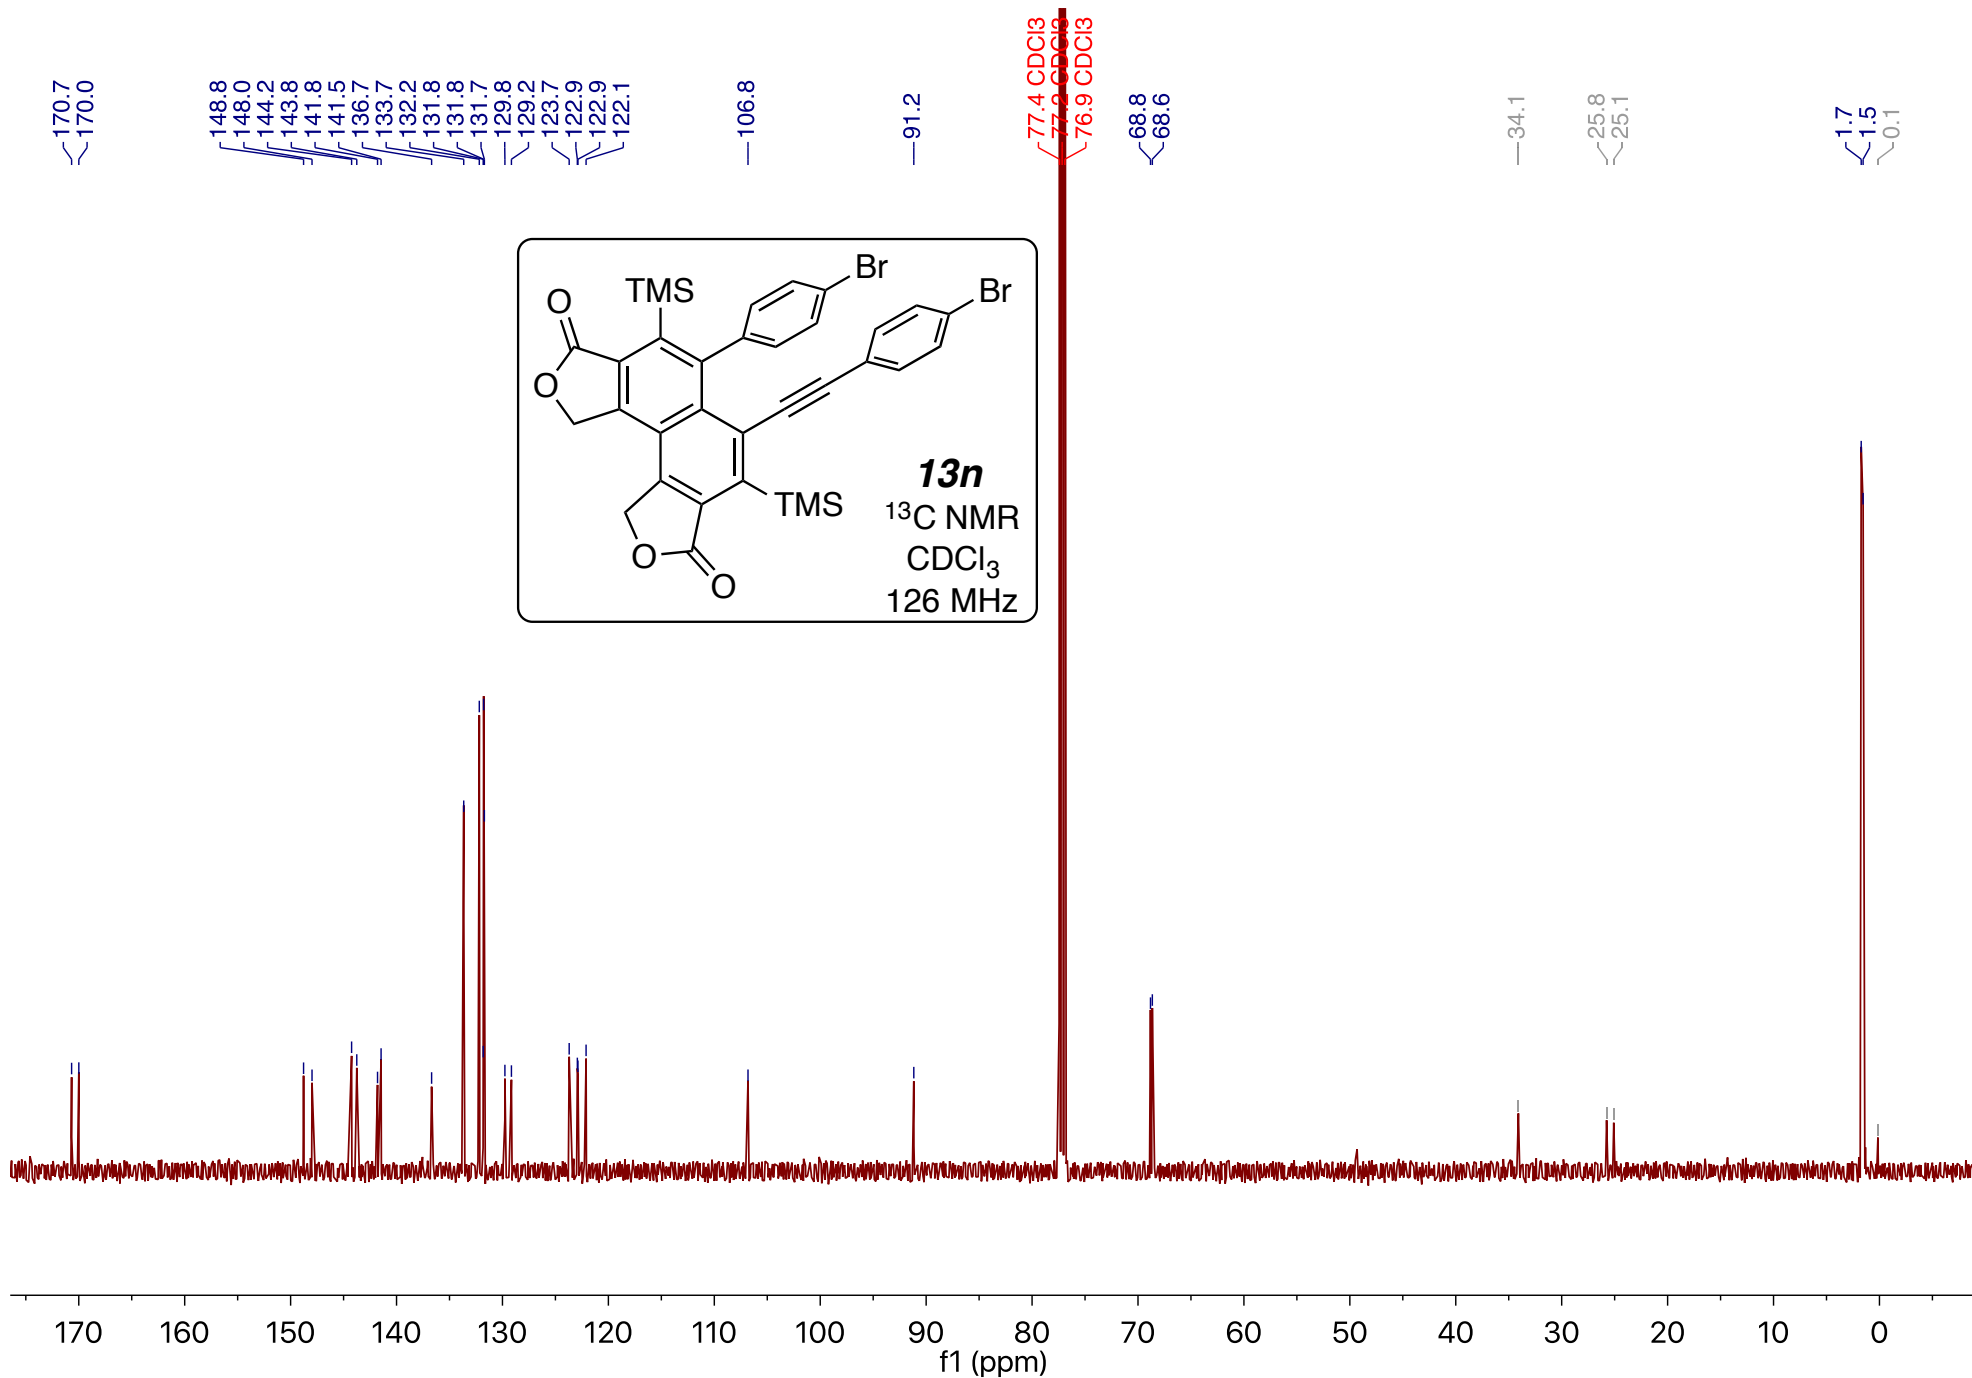

7.64  
7.62  
7.58  
7.56  
7.55  
7.54  
7.26 CDCl<sub>3</sub>  
7.13  
7.11

5.66  
5.64

0.47

0.01  
0.00

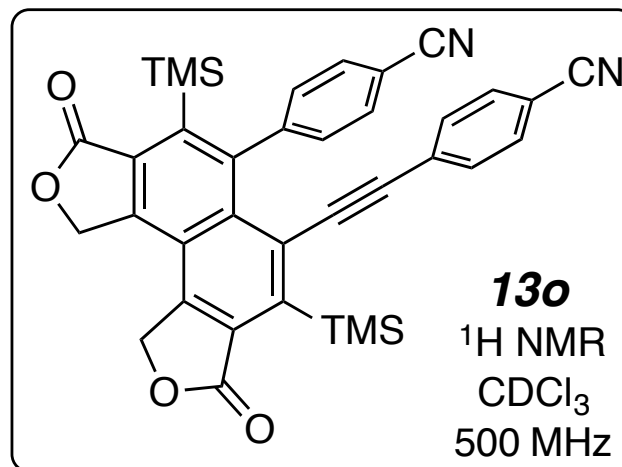

2.00

3.92

1.95

1.99

1.95

8.89

8.98

9.5 9.0 8.5 8.0 7.5 7.0 6.5 6.0 5.5 5.0 4.5 4.0 3.5 3.0 2.5 2.0 1.5 1.0 0.5 0.0 -0.5 -1.0  
f1 (ppm)

170.4  
169.7  
148.8  
147.7  
147.3  
144.7  
144.4  
142.3  
136.3  
132.9  
132.4  
132.1  
130.8  
130.4  
130.0  
129.4  
127.5  
123.0  
118.2  
118.2  
113.0  
112.5  
105.2

94.1

77.4 CDCl<sub>3</sub>  
77.0 CDCl<sub>3</sub>  
76.6 CDCl<sub>3</sub>

68.8  
68.6

1.7  
1.6  
0.1

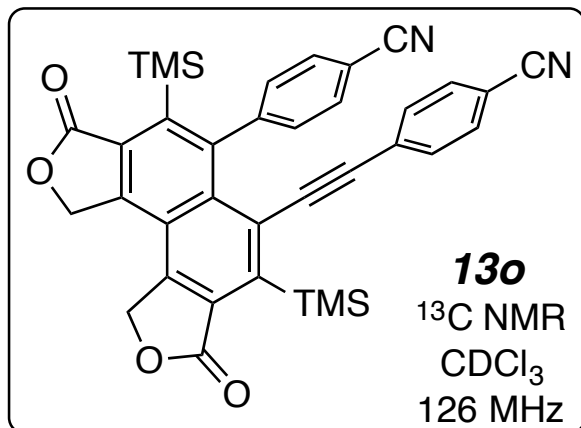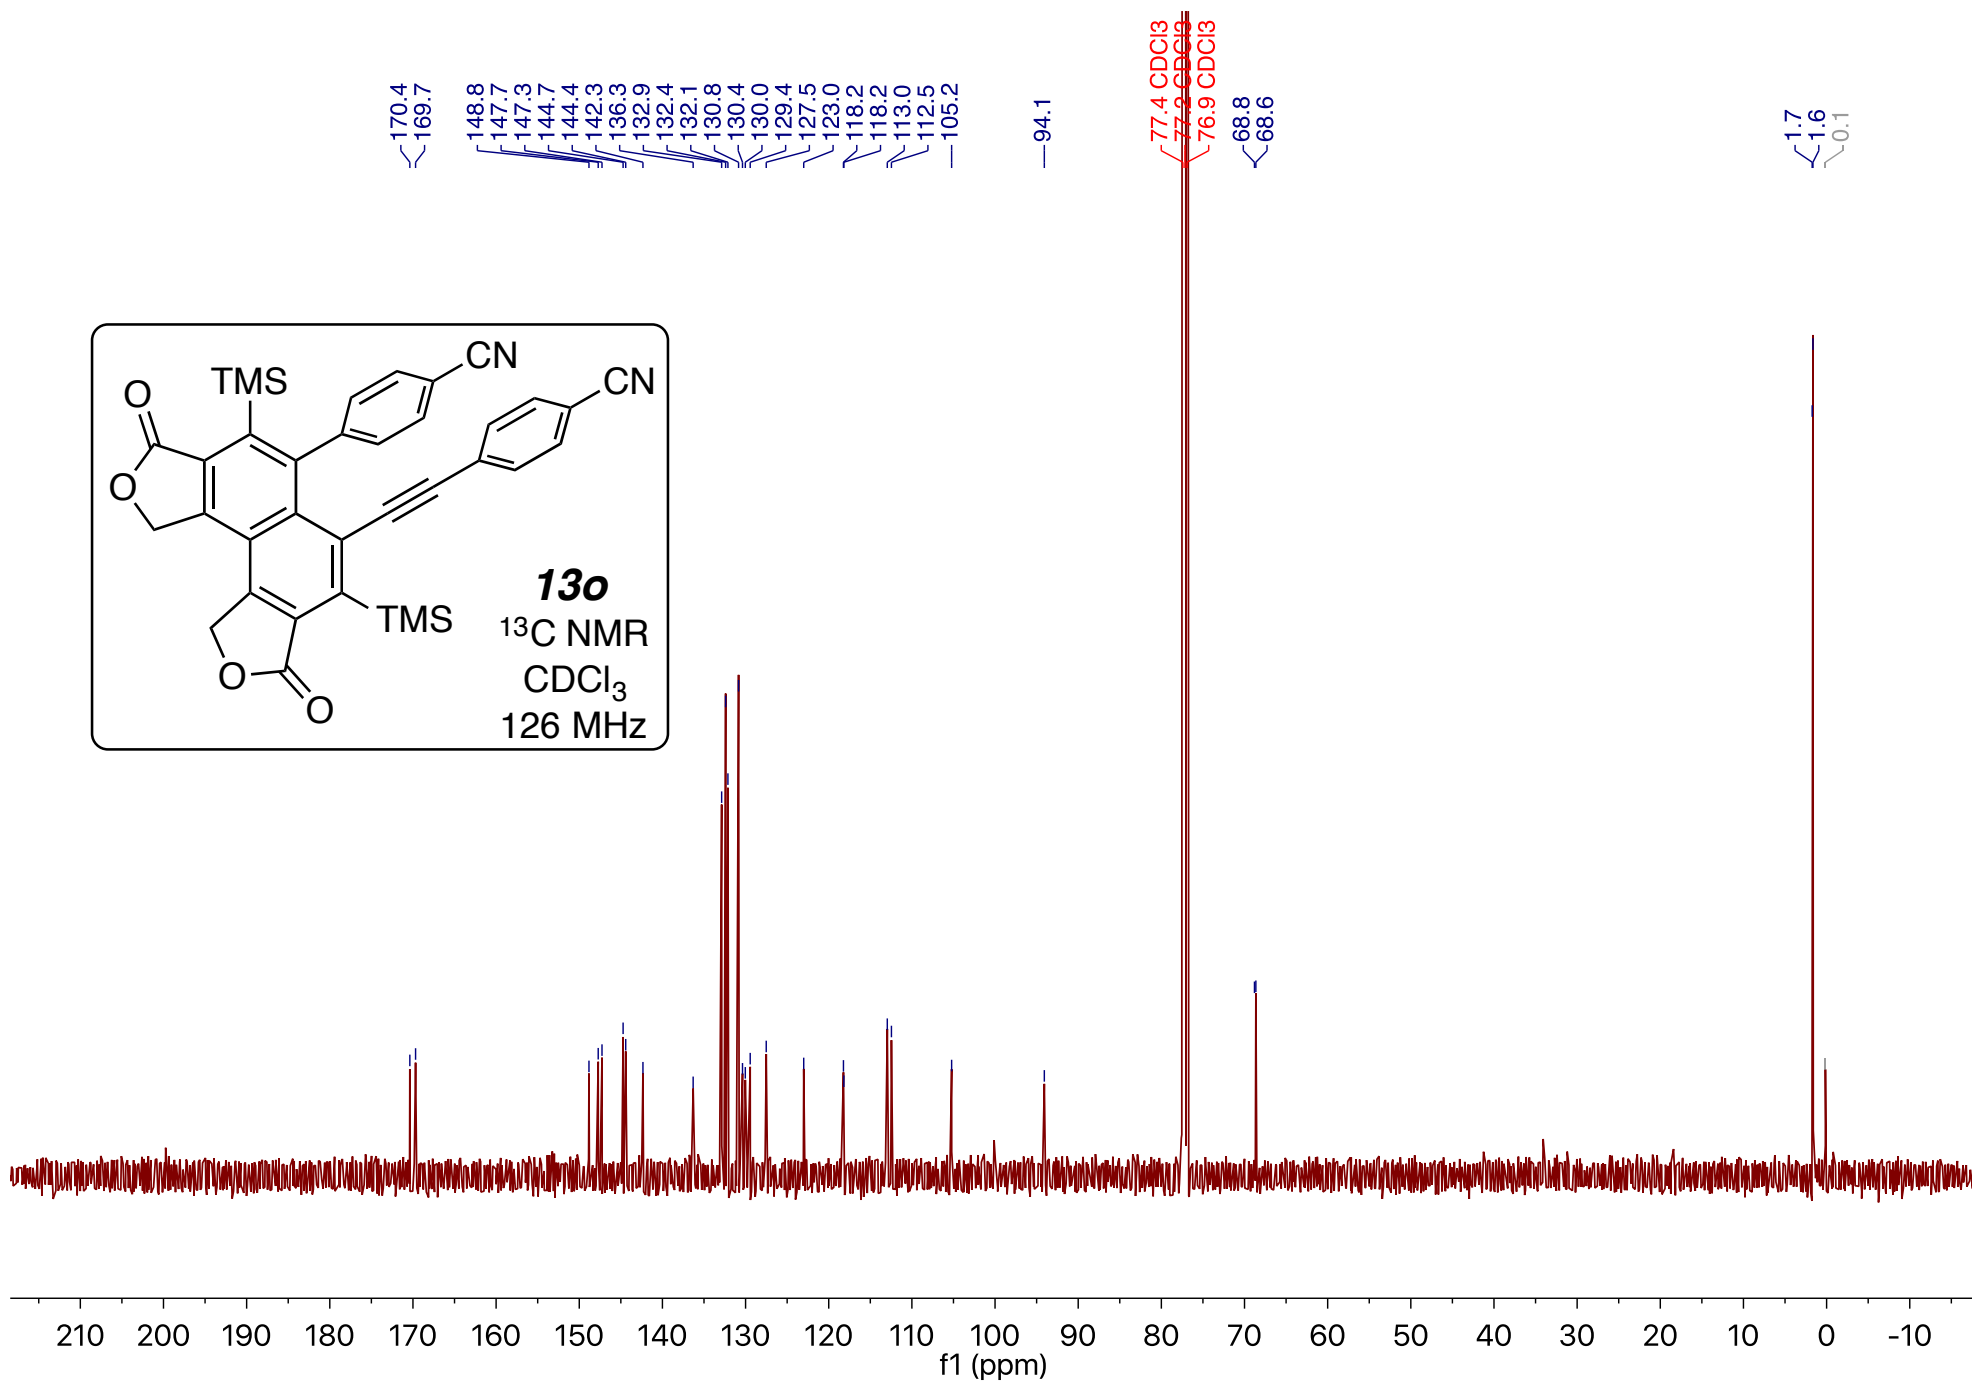



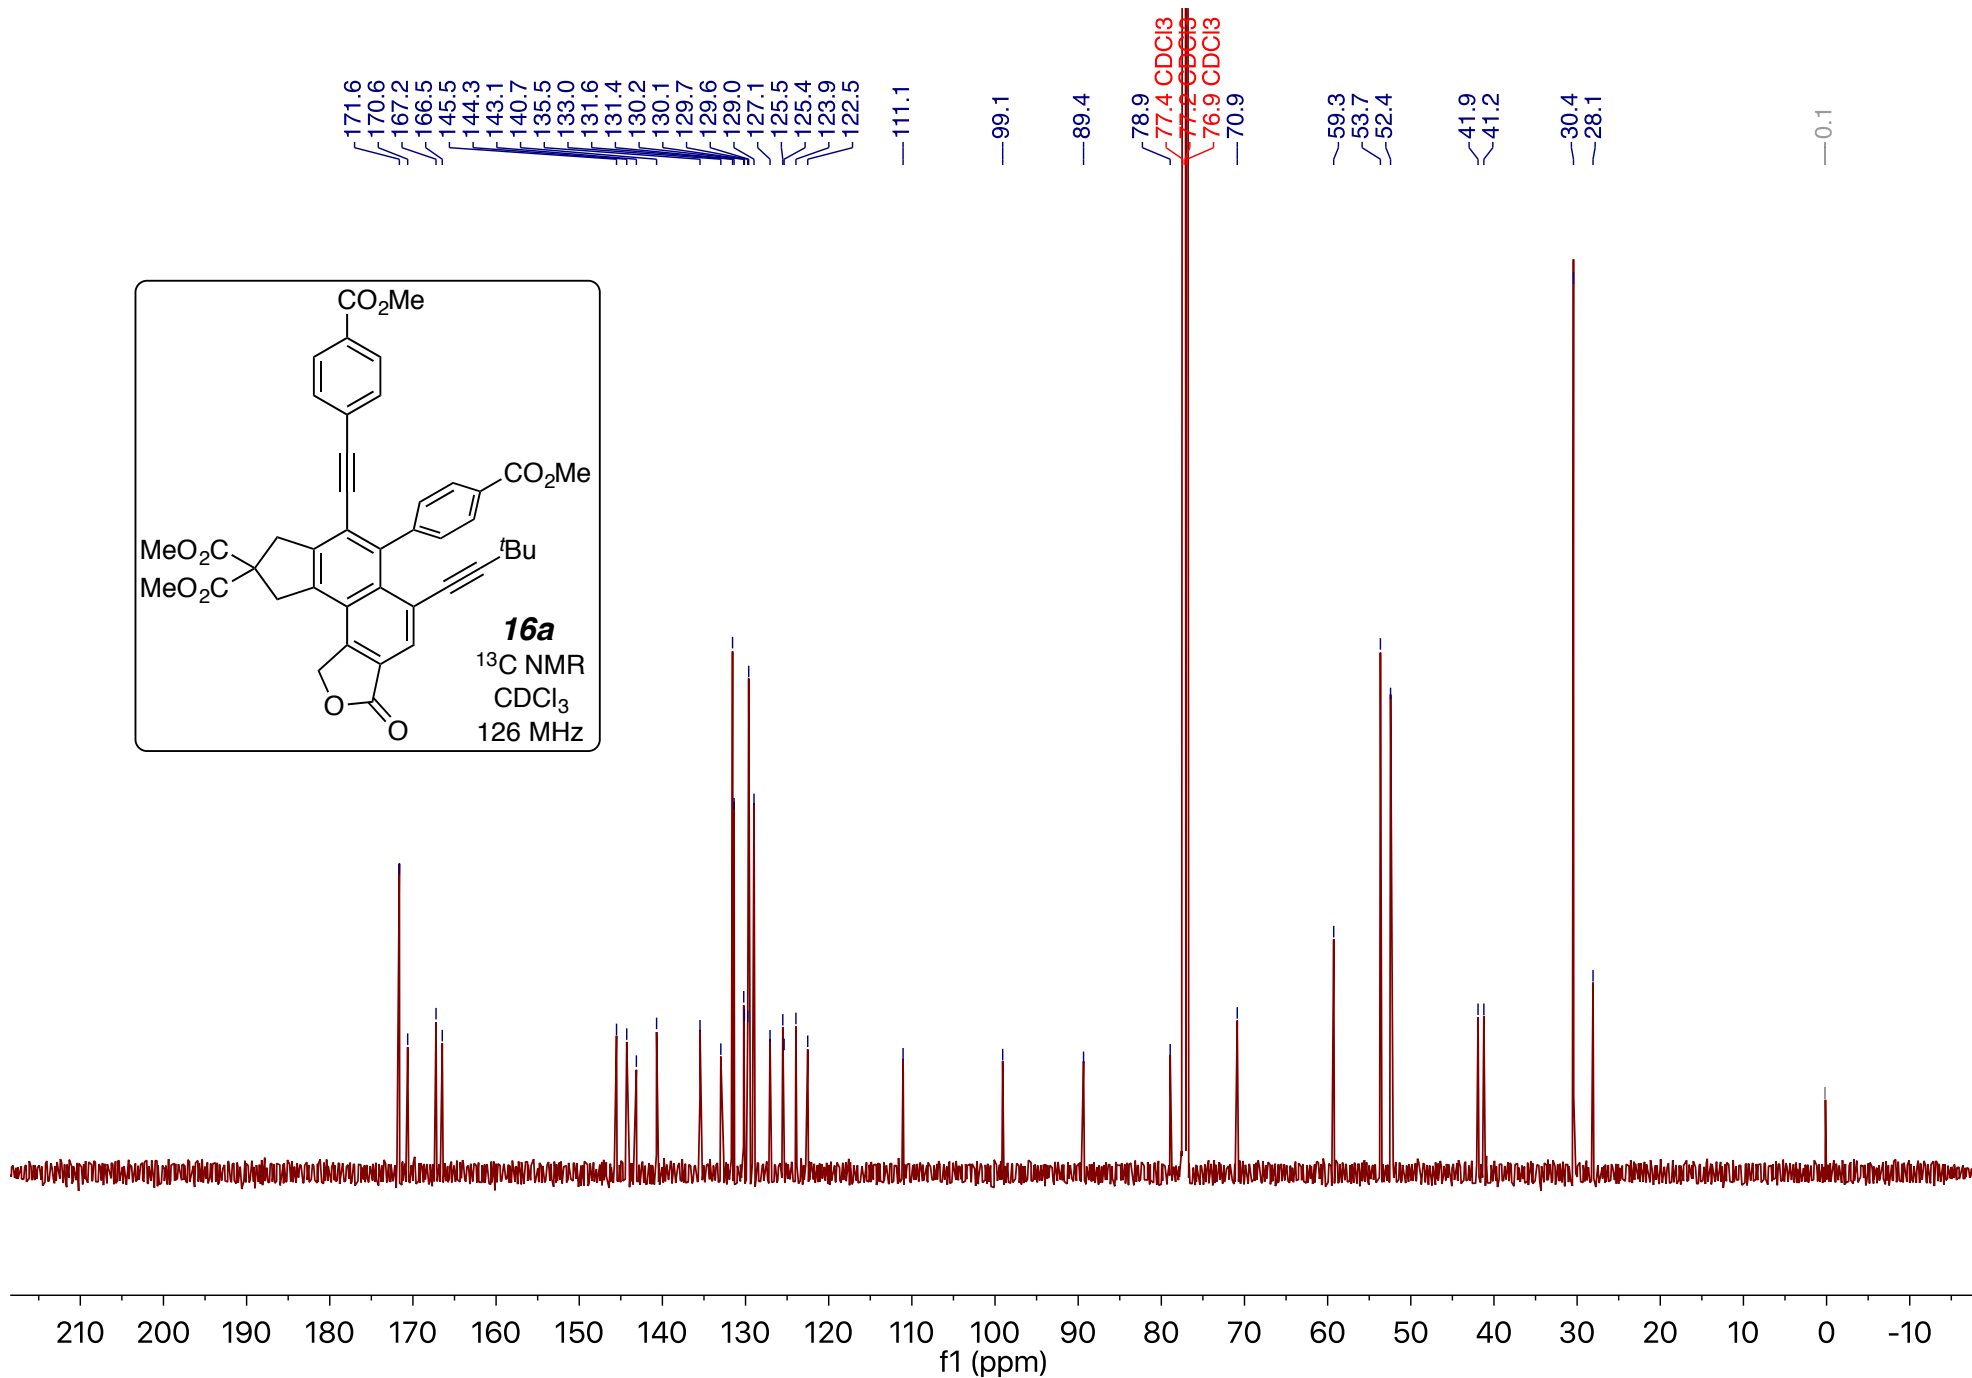

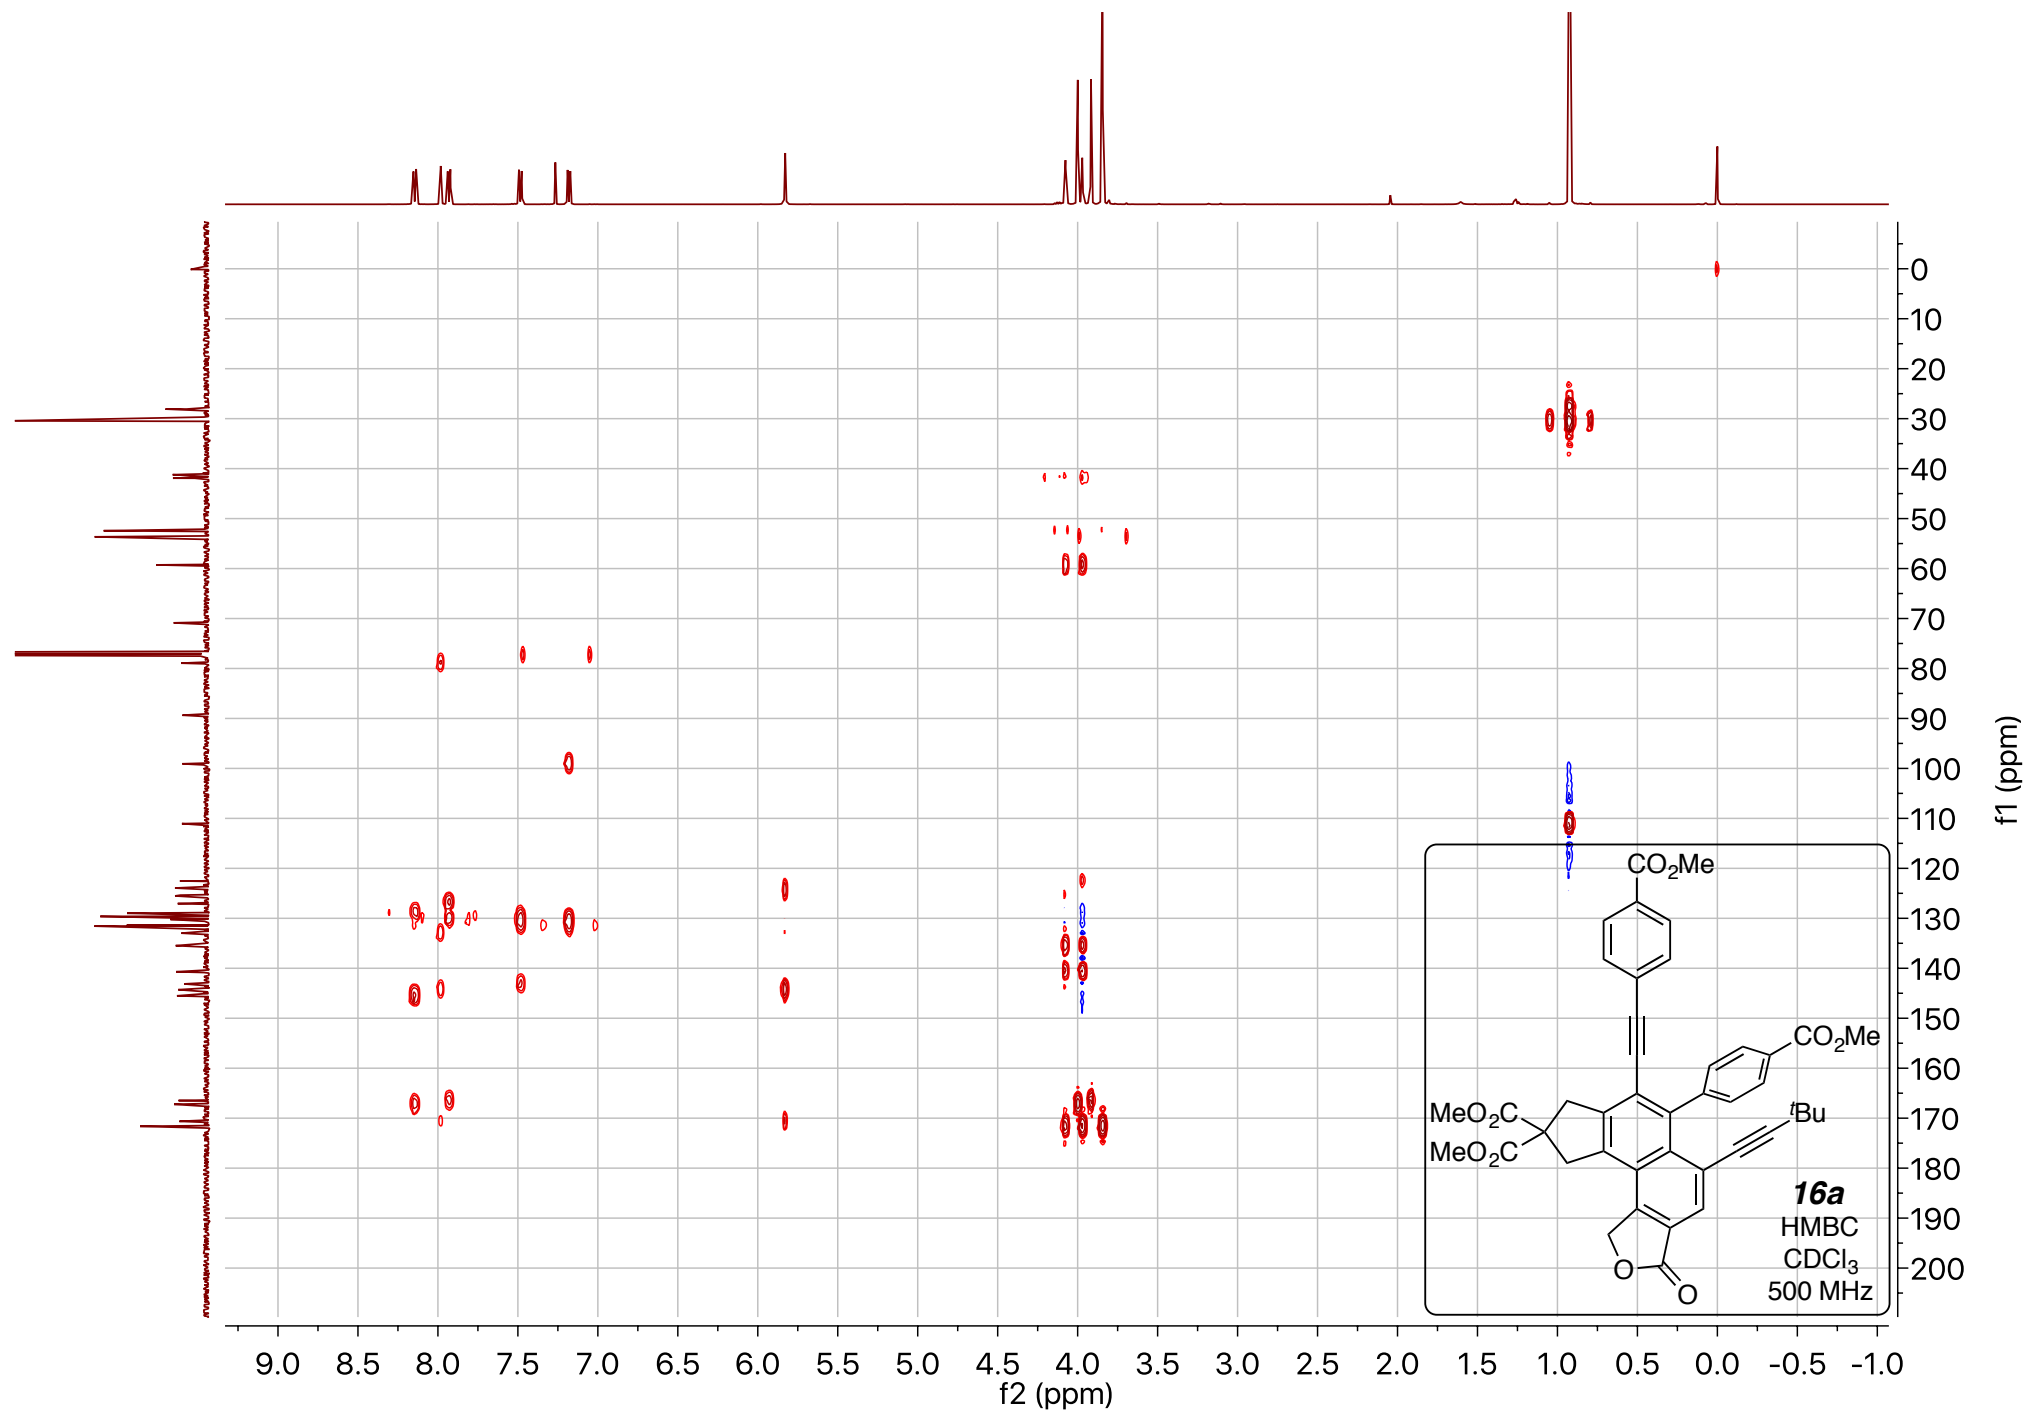

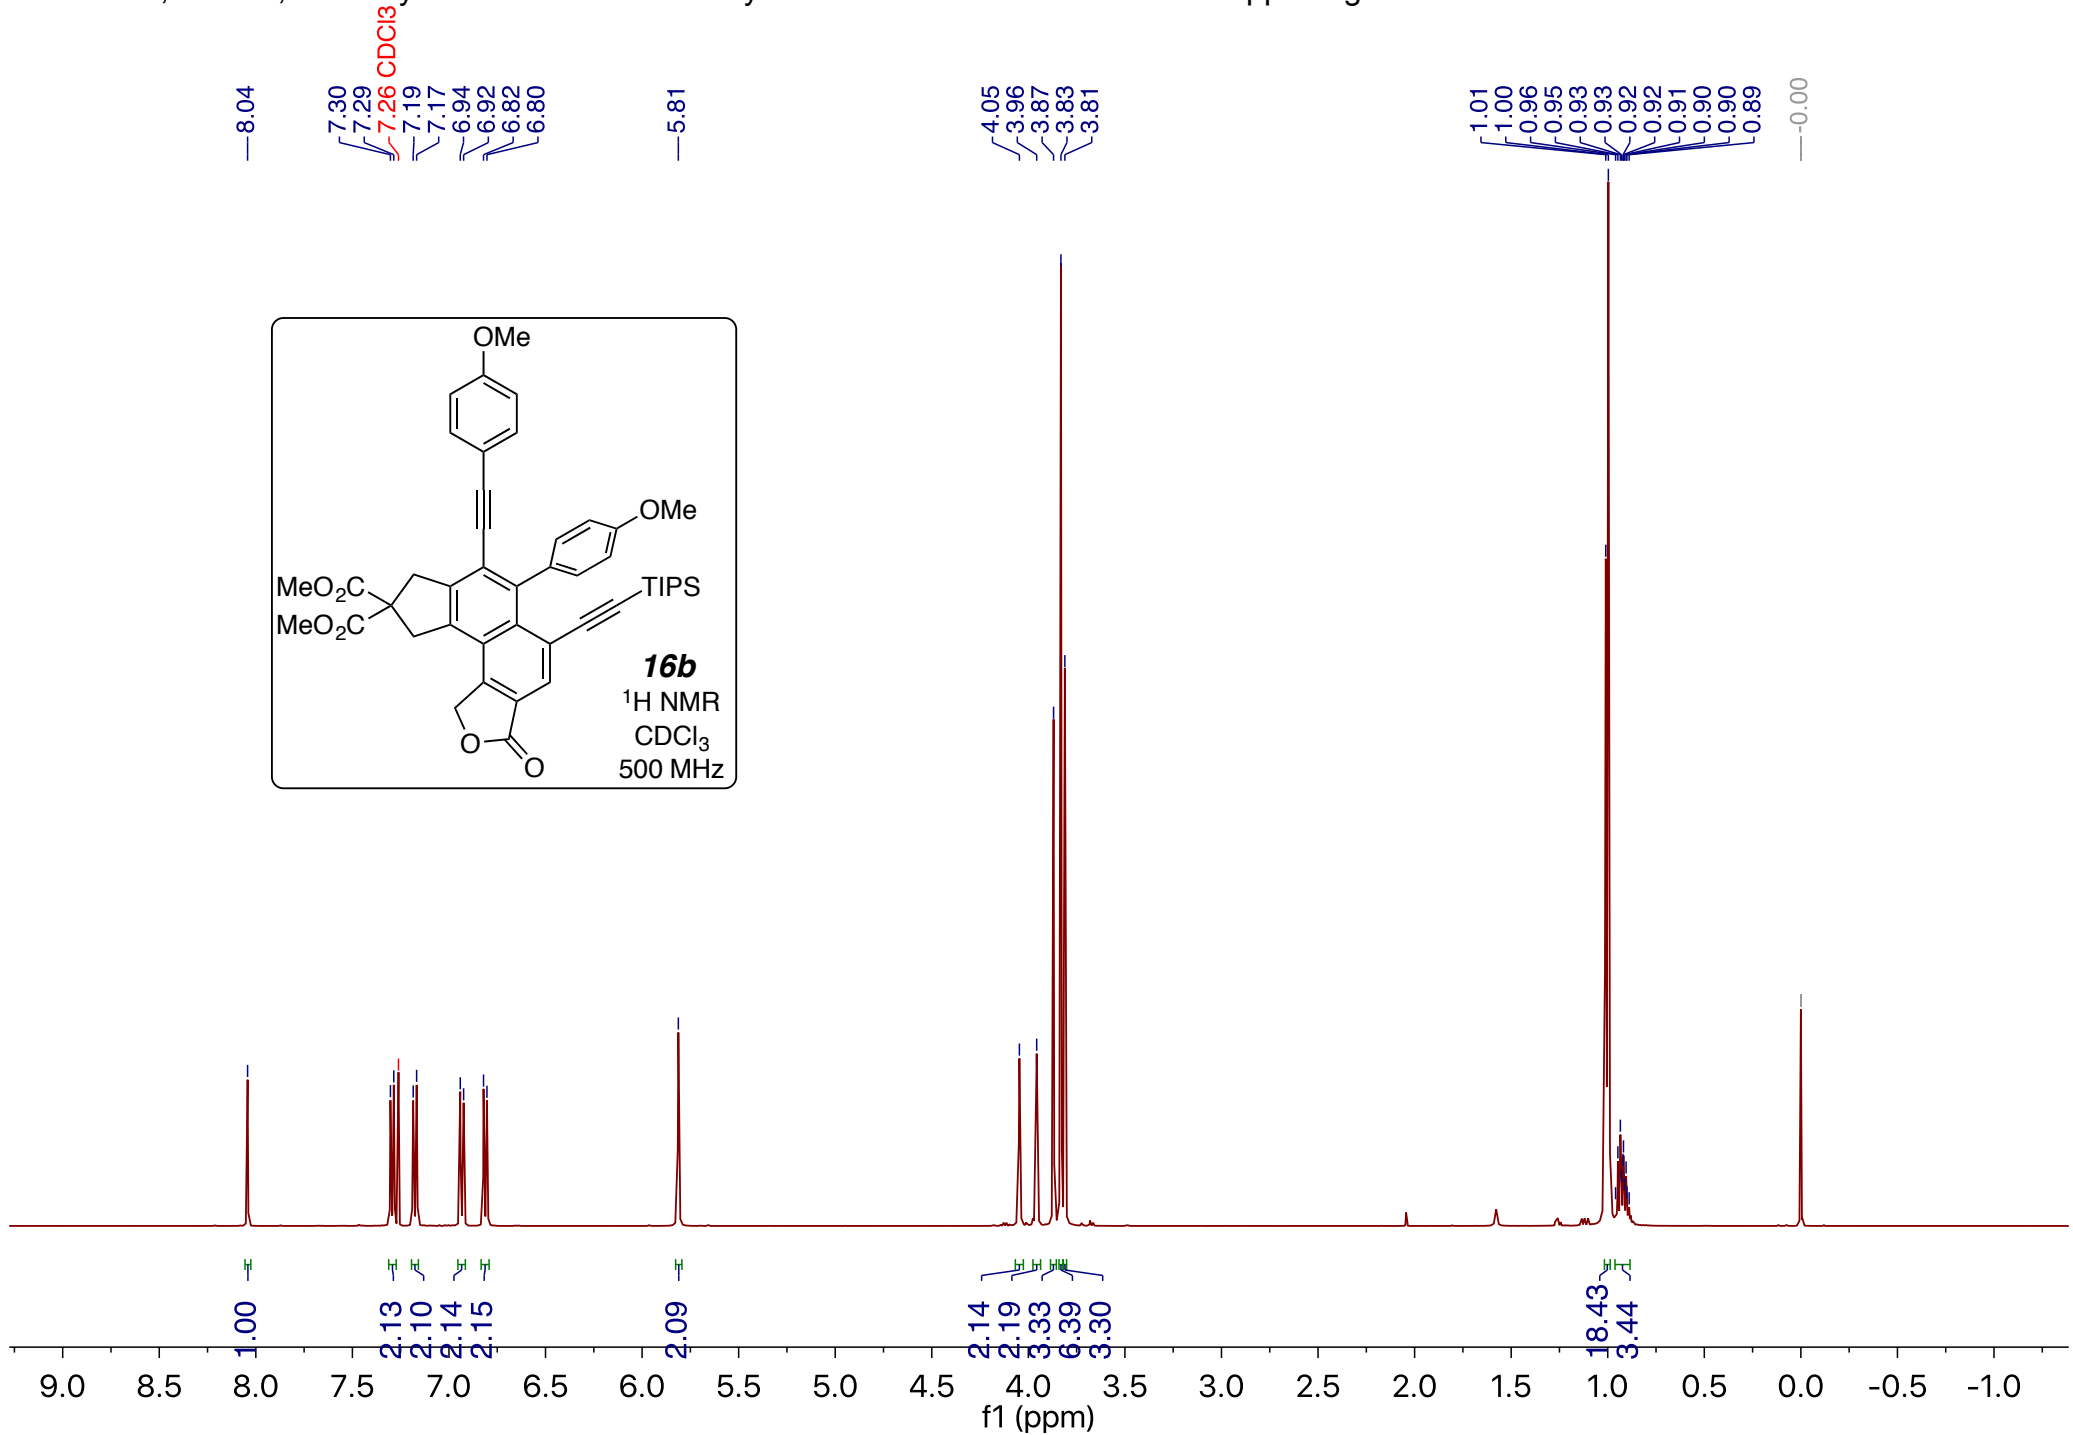

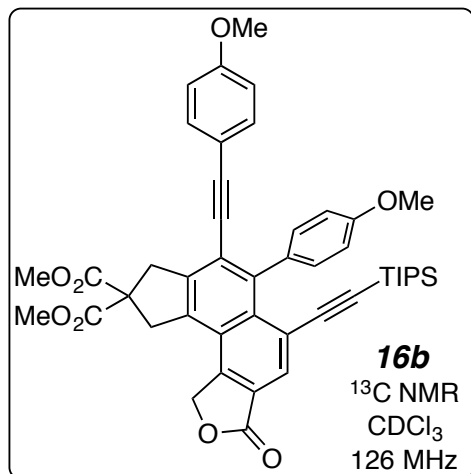

171.8  
170.7  
160.2  
159.3  
145.2  
143.1  
140.8  
134.3  
134.0  
133.4  
132.7  
132.3  
130.8  
125.0  
124.8  
124.2  
123.2  
115.0  
114.1  
113.2  
105.7  
103.7  
100.1

86.3

77.4 CDCl<sub>3</sub>  
77.2 CDCl<sub>3</sub>  
76.9 CDCl<sub>3</sub>

70.8

59.4

55.5

55.0

53.6

41.9

41.3

18.9

11.7

0.1

210 200 190 180 170 160 150 140 130 120 110 100 90 80 70 60 50 40 30 20 10 0 -10  
f1 (ppm)



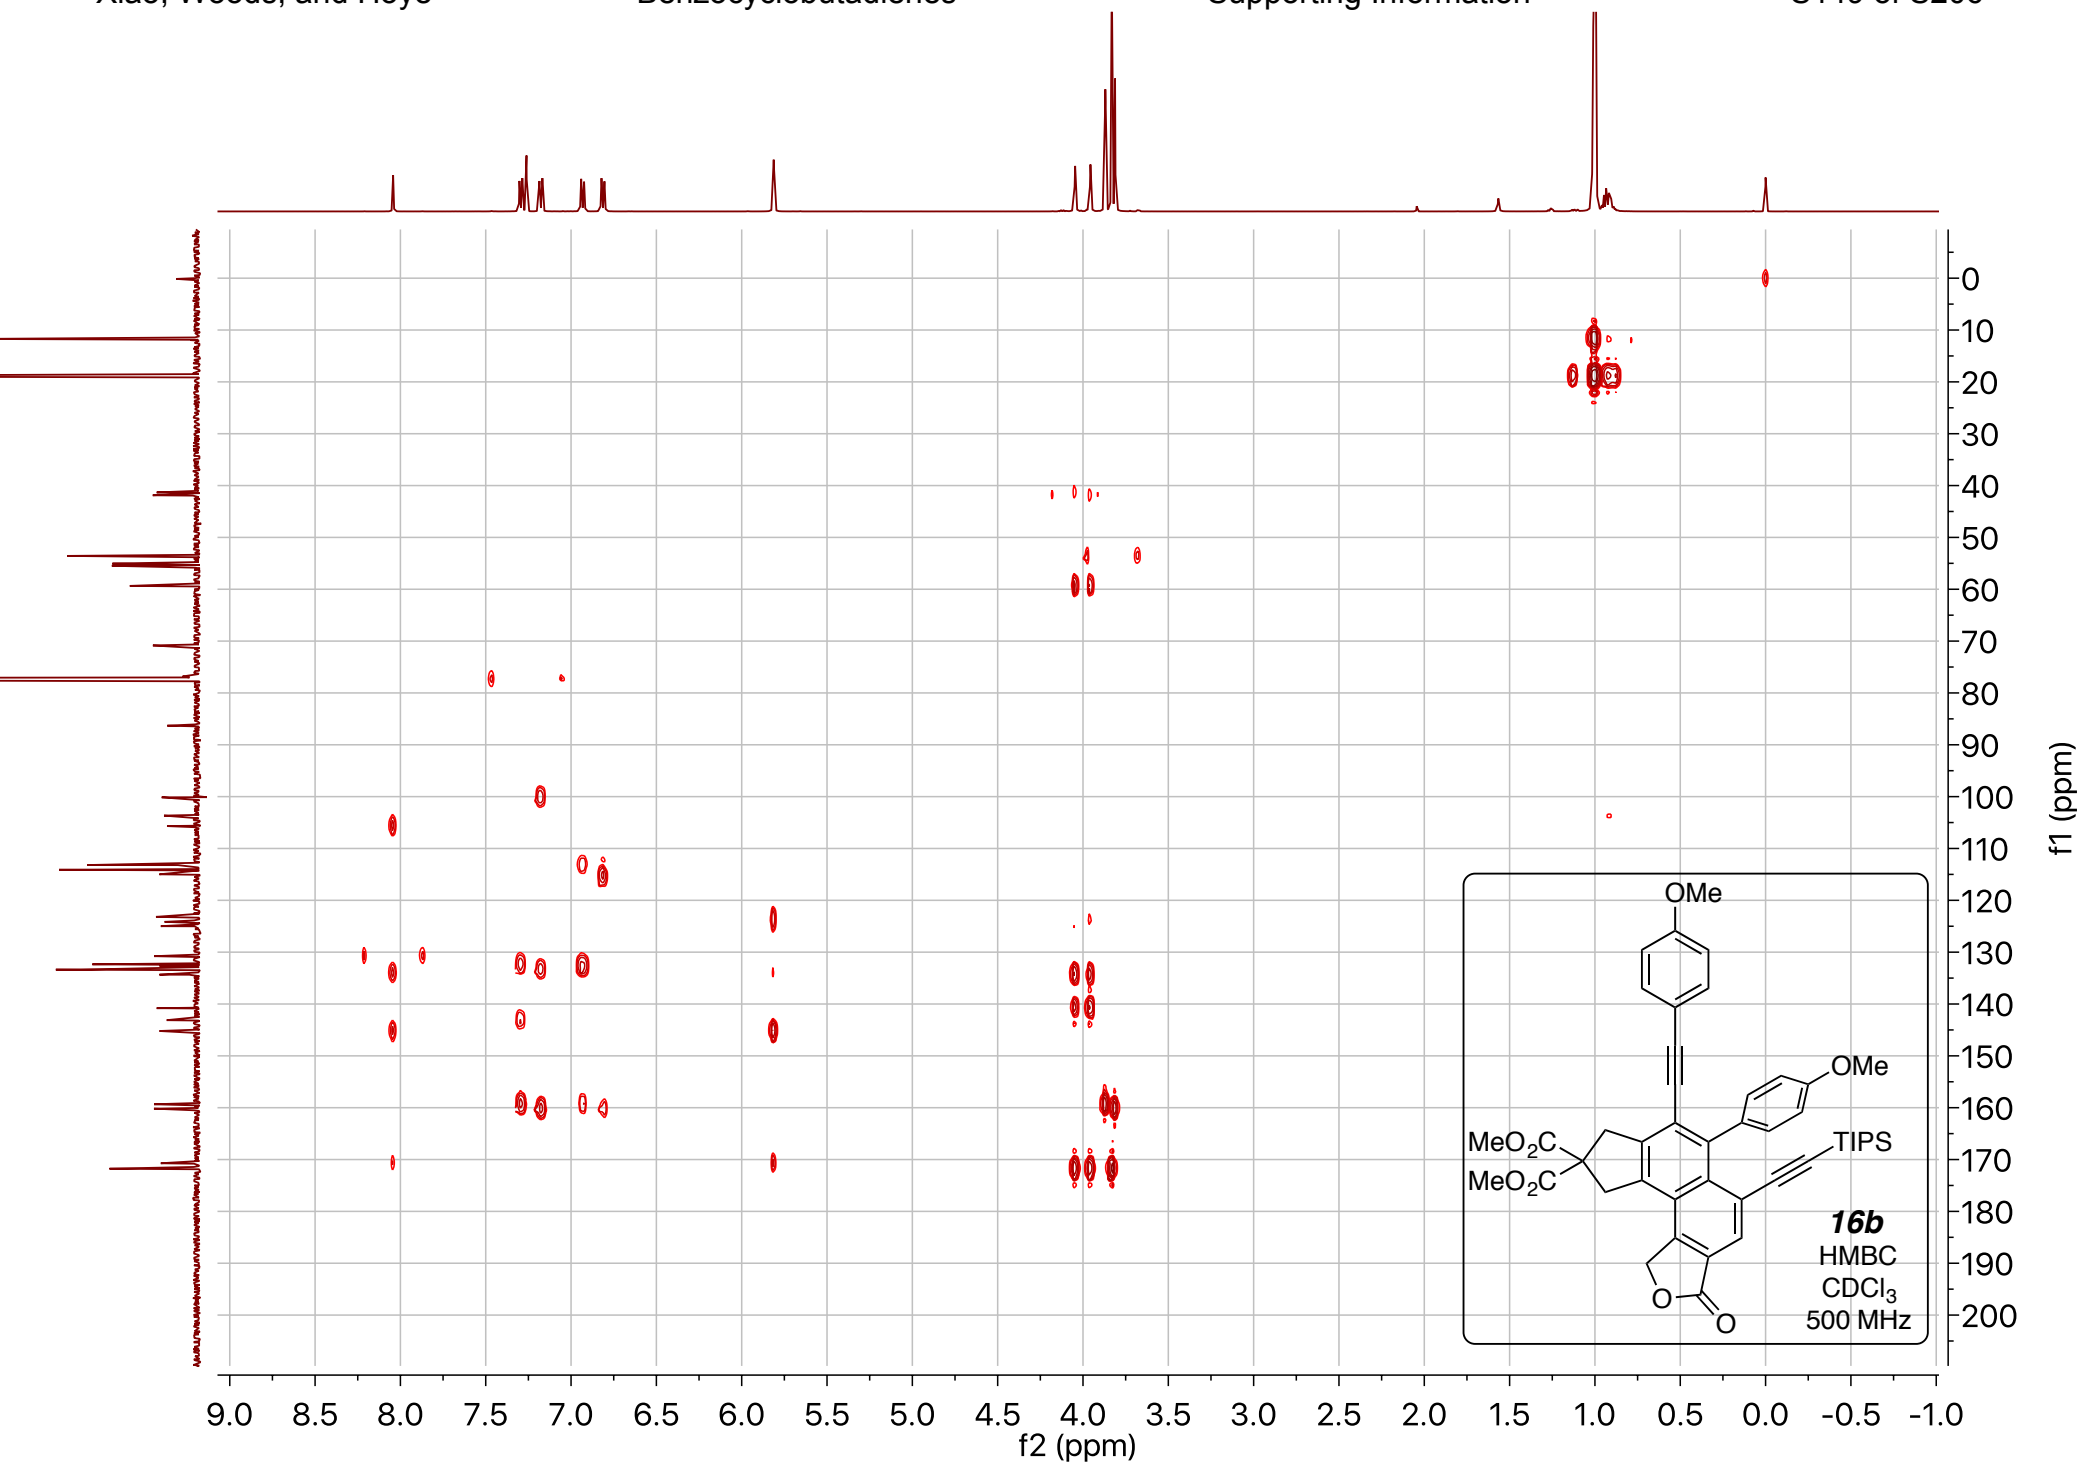

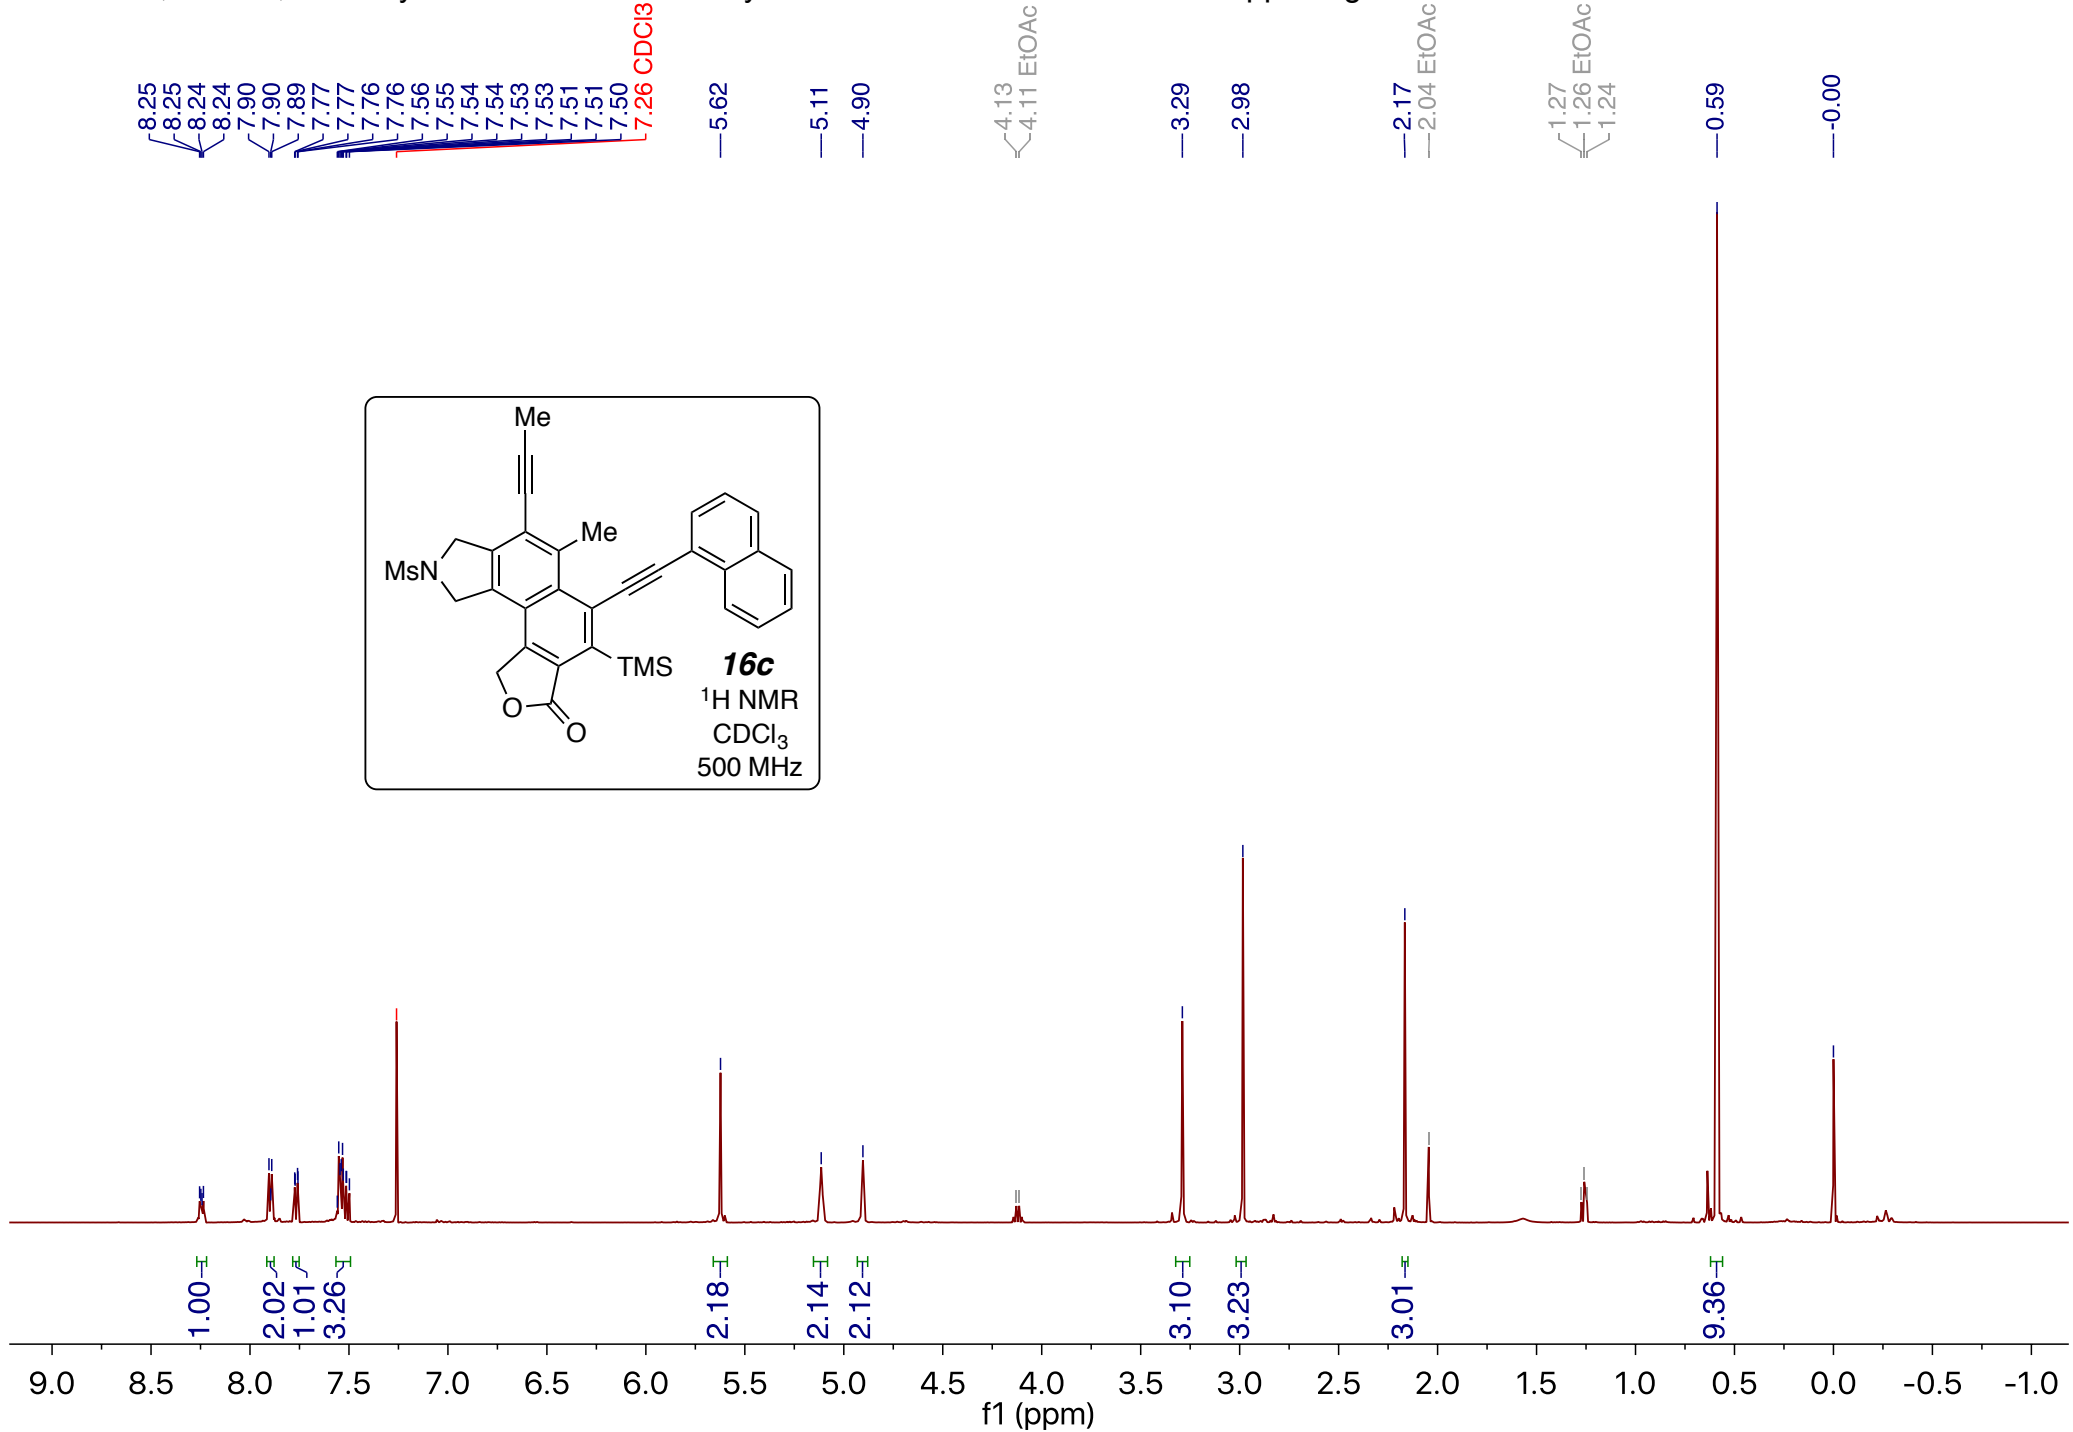

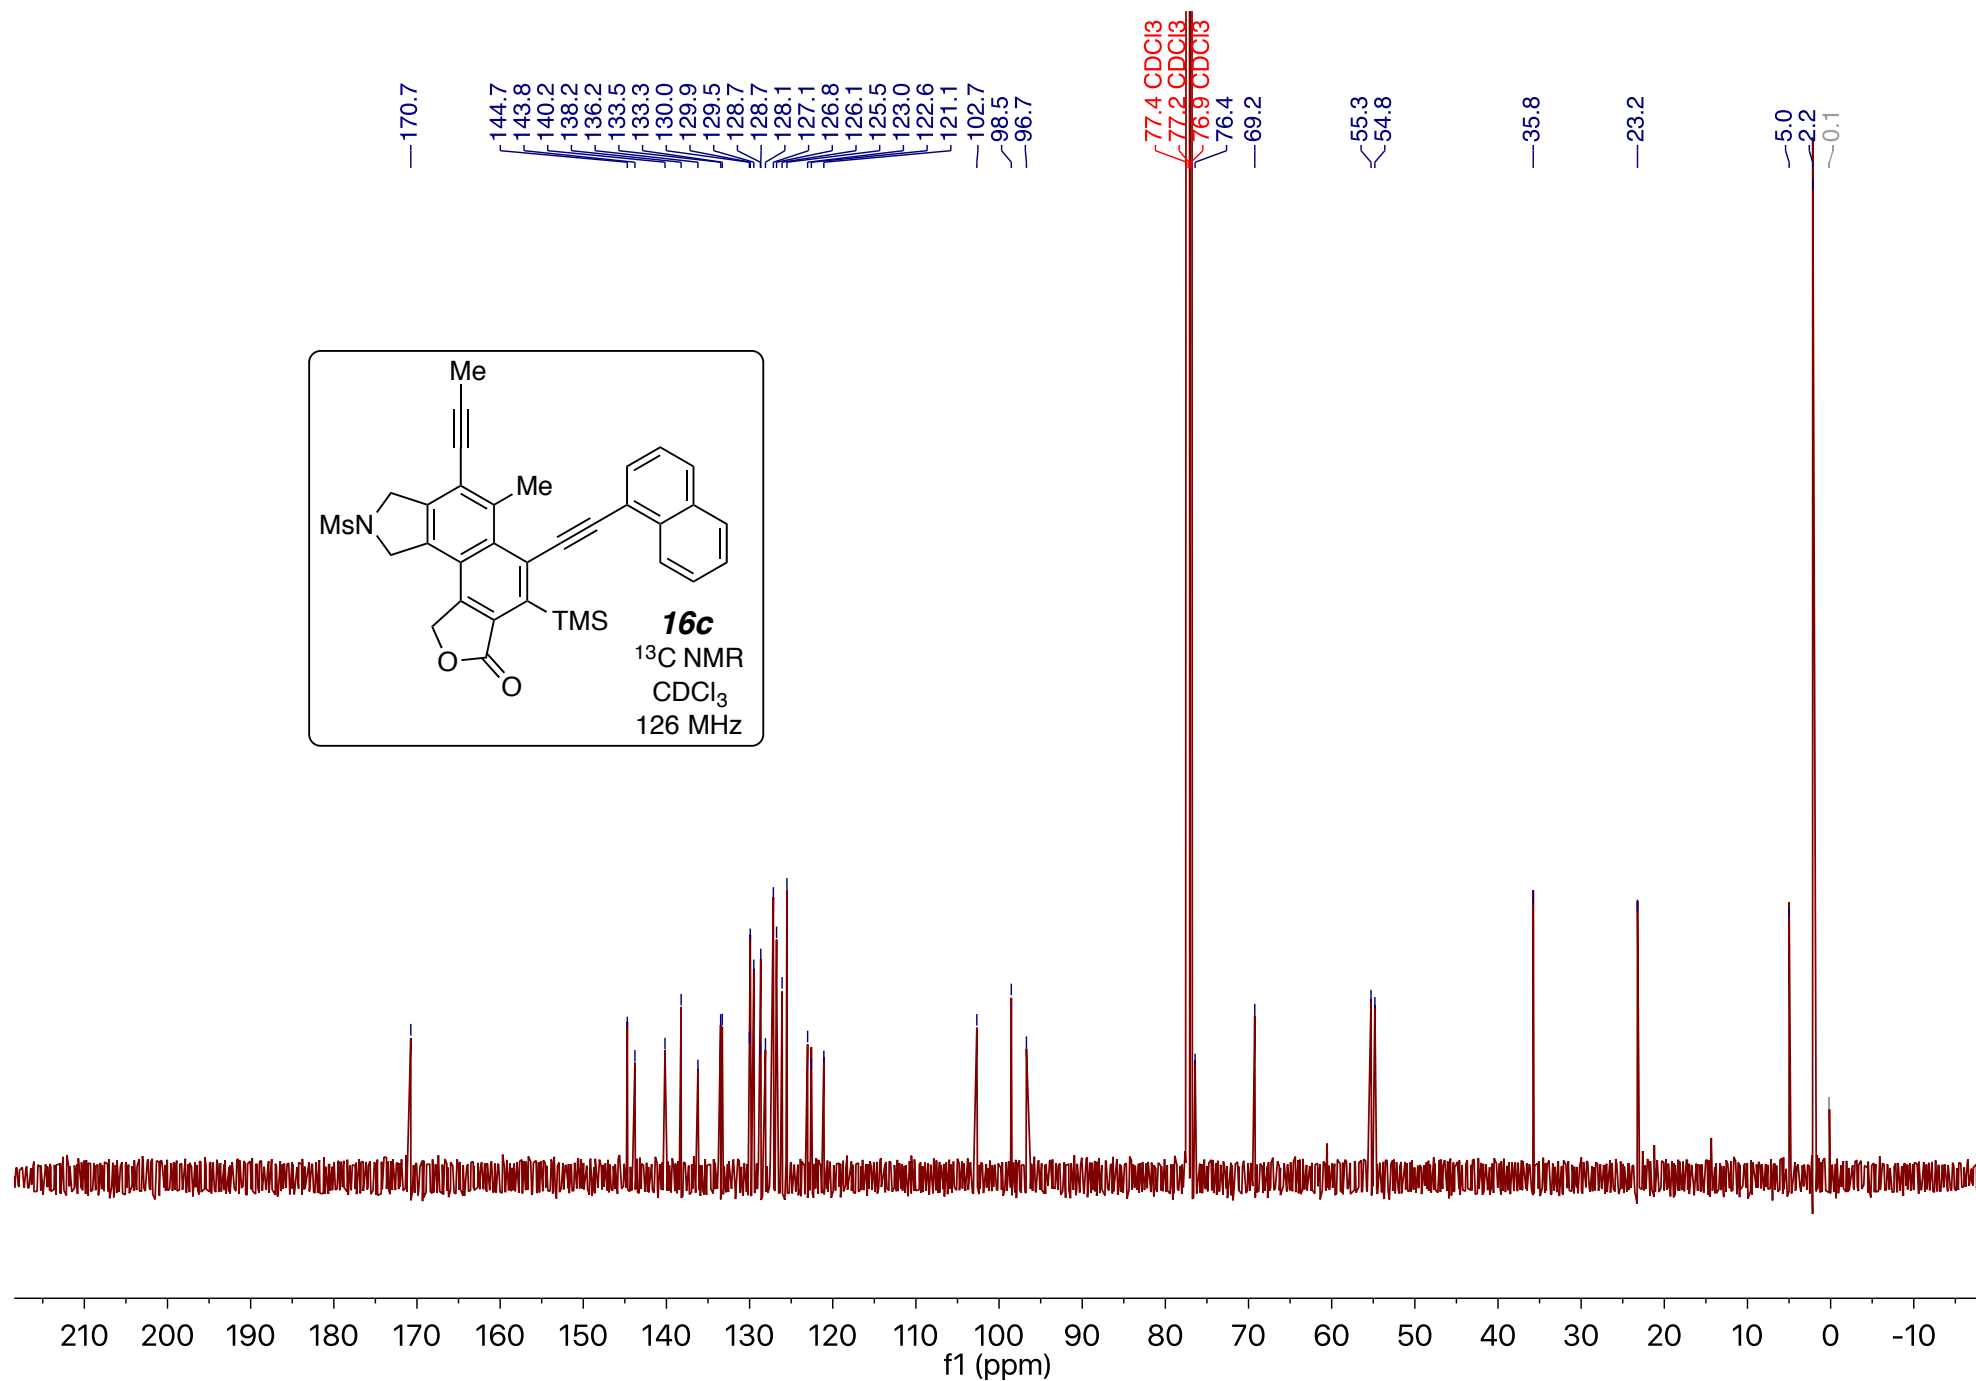

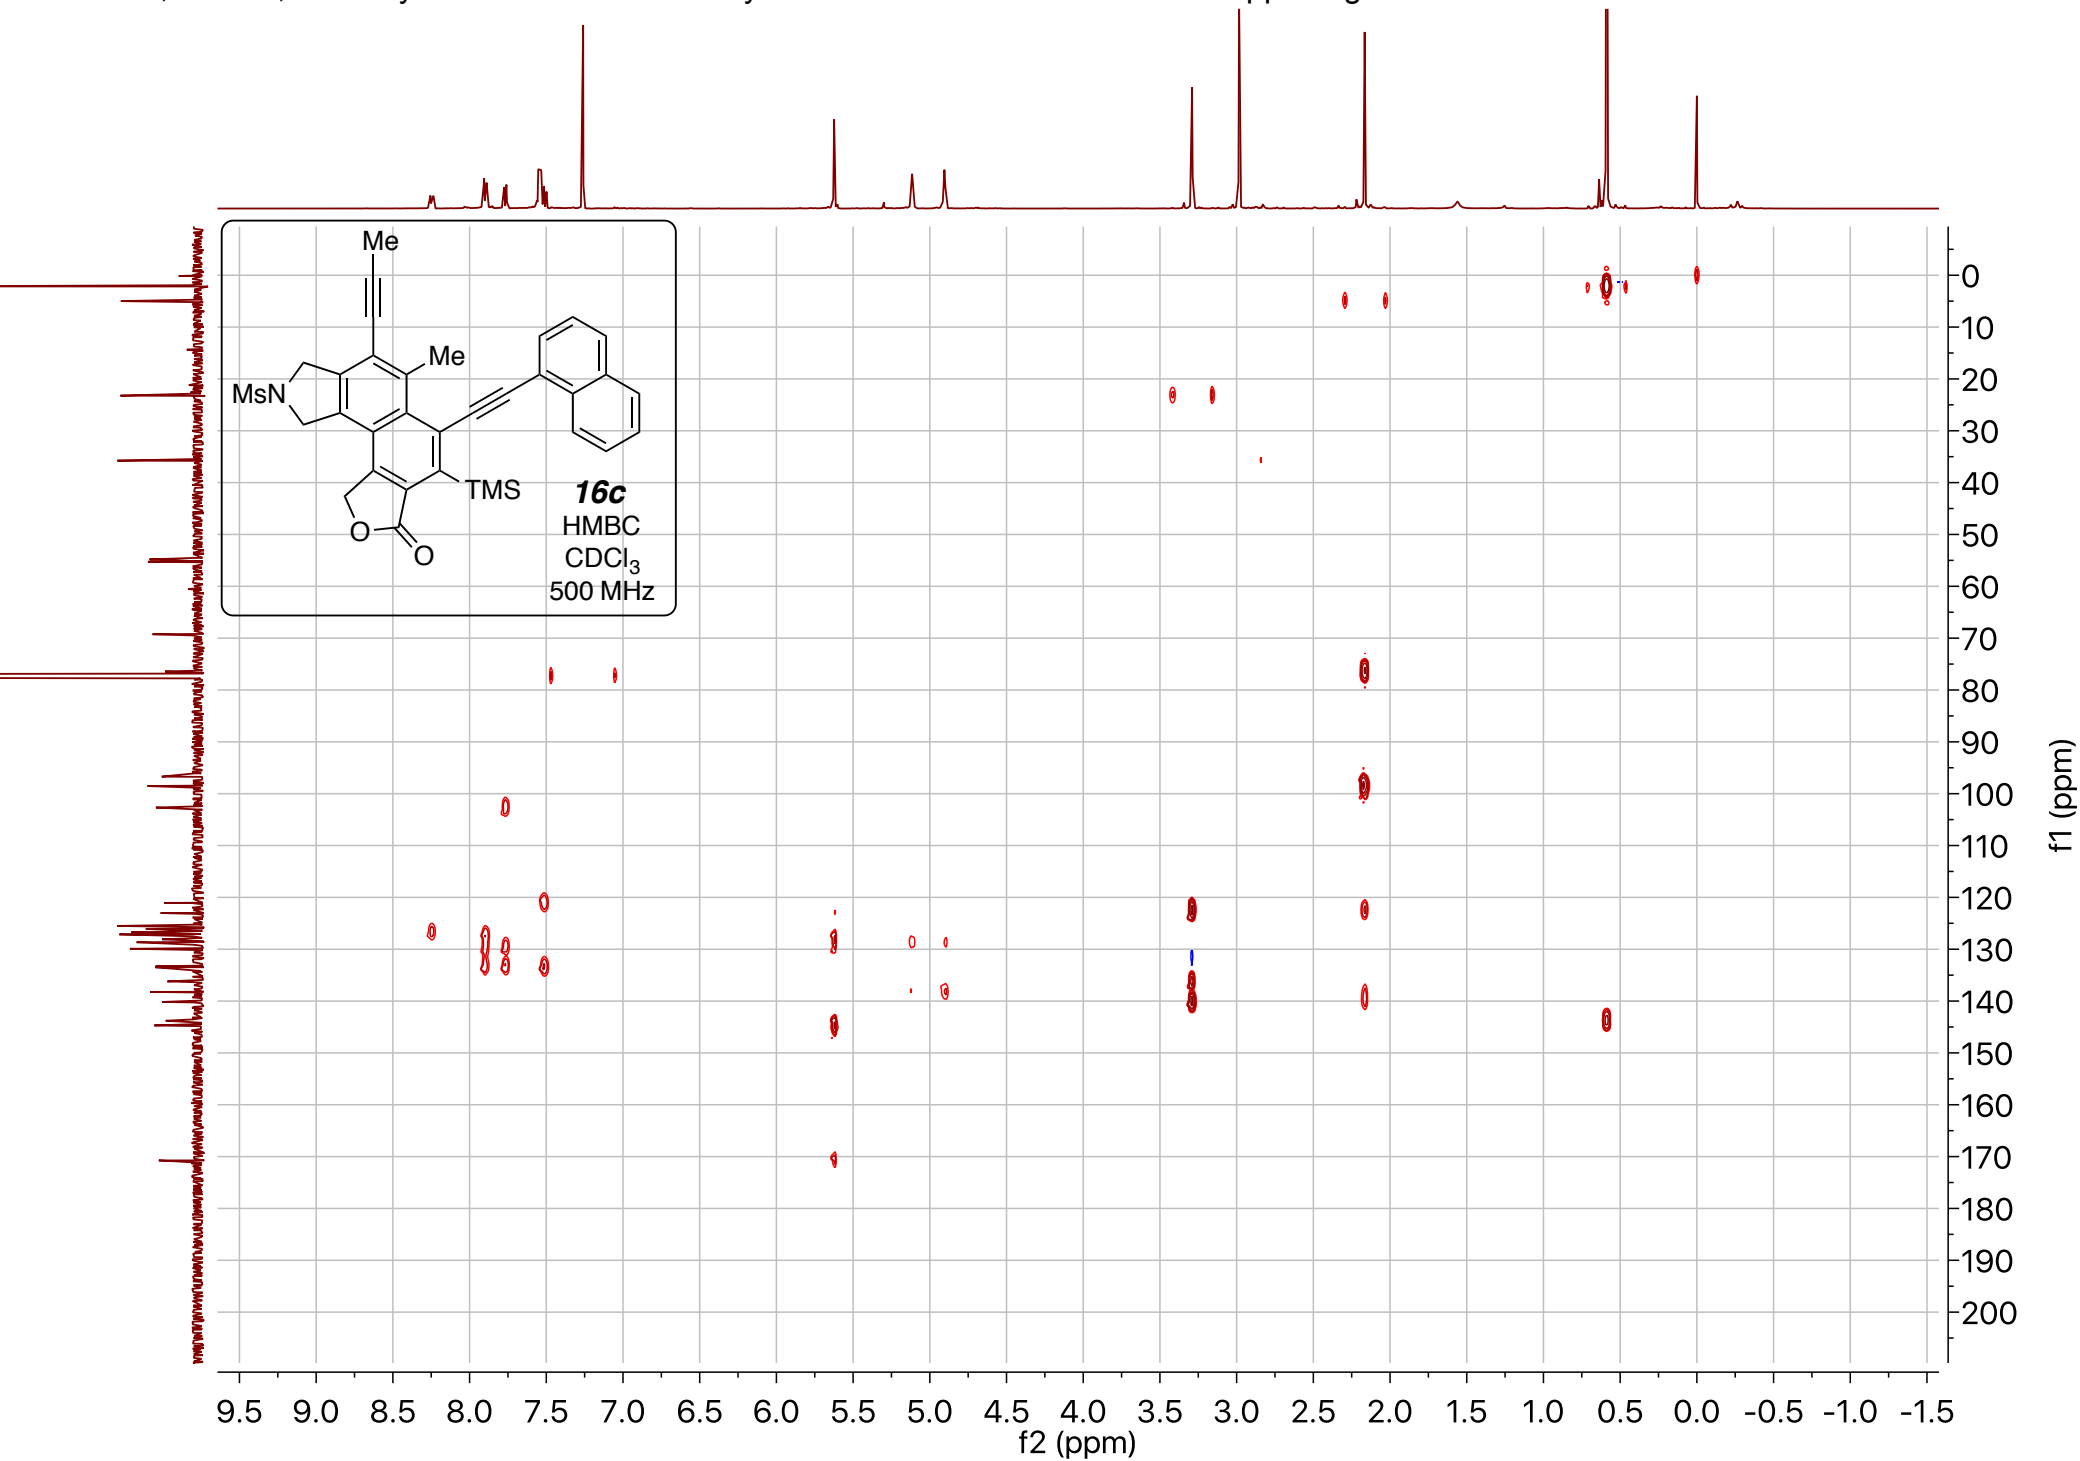

8.33  
8.31  
7.94  
7.92  
7.90  
7.90  
7.60  
7.60  
7.59  
7.57  
7.56  
7.56  
7.55  
7.54  
7.54  
7.26 CDCl<sub>3</sub>

5.85  
5.75

4.86

4.11 EtOAc

2.90  
2.74

2.19  
2.04 EtOAc

1.26 EtOAc

0.57

0.00

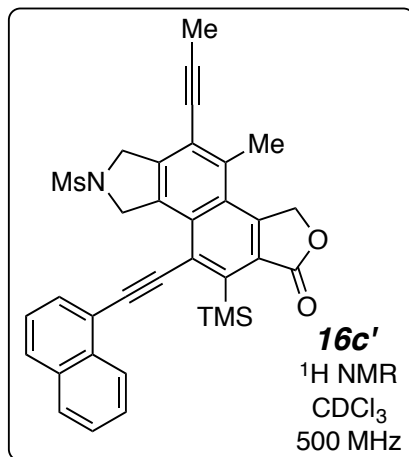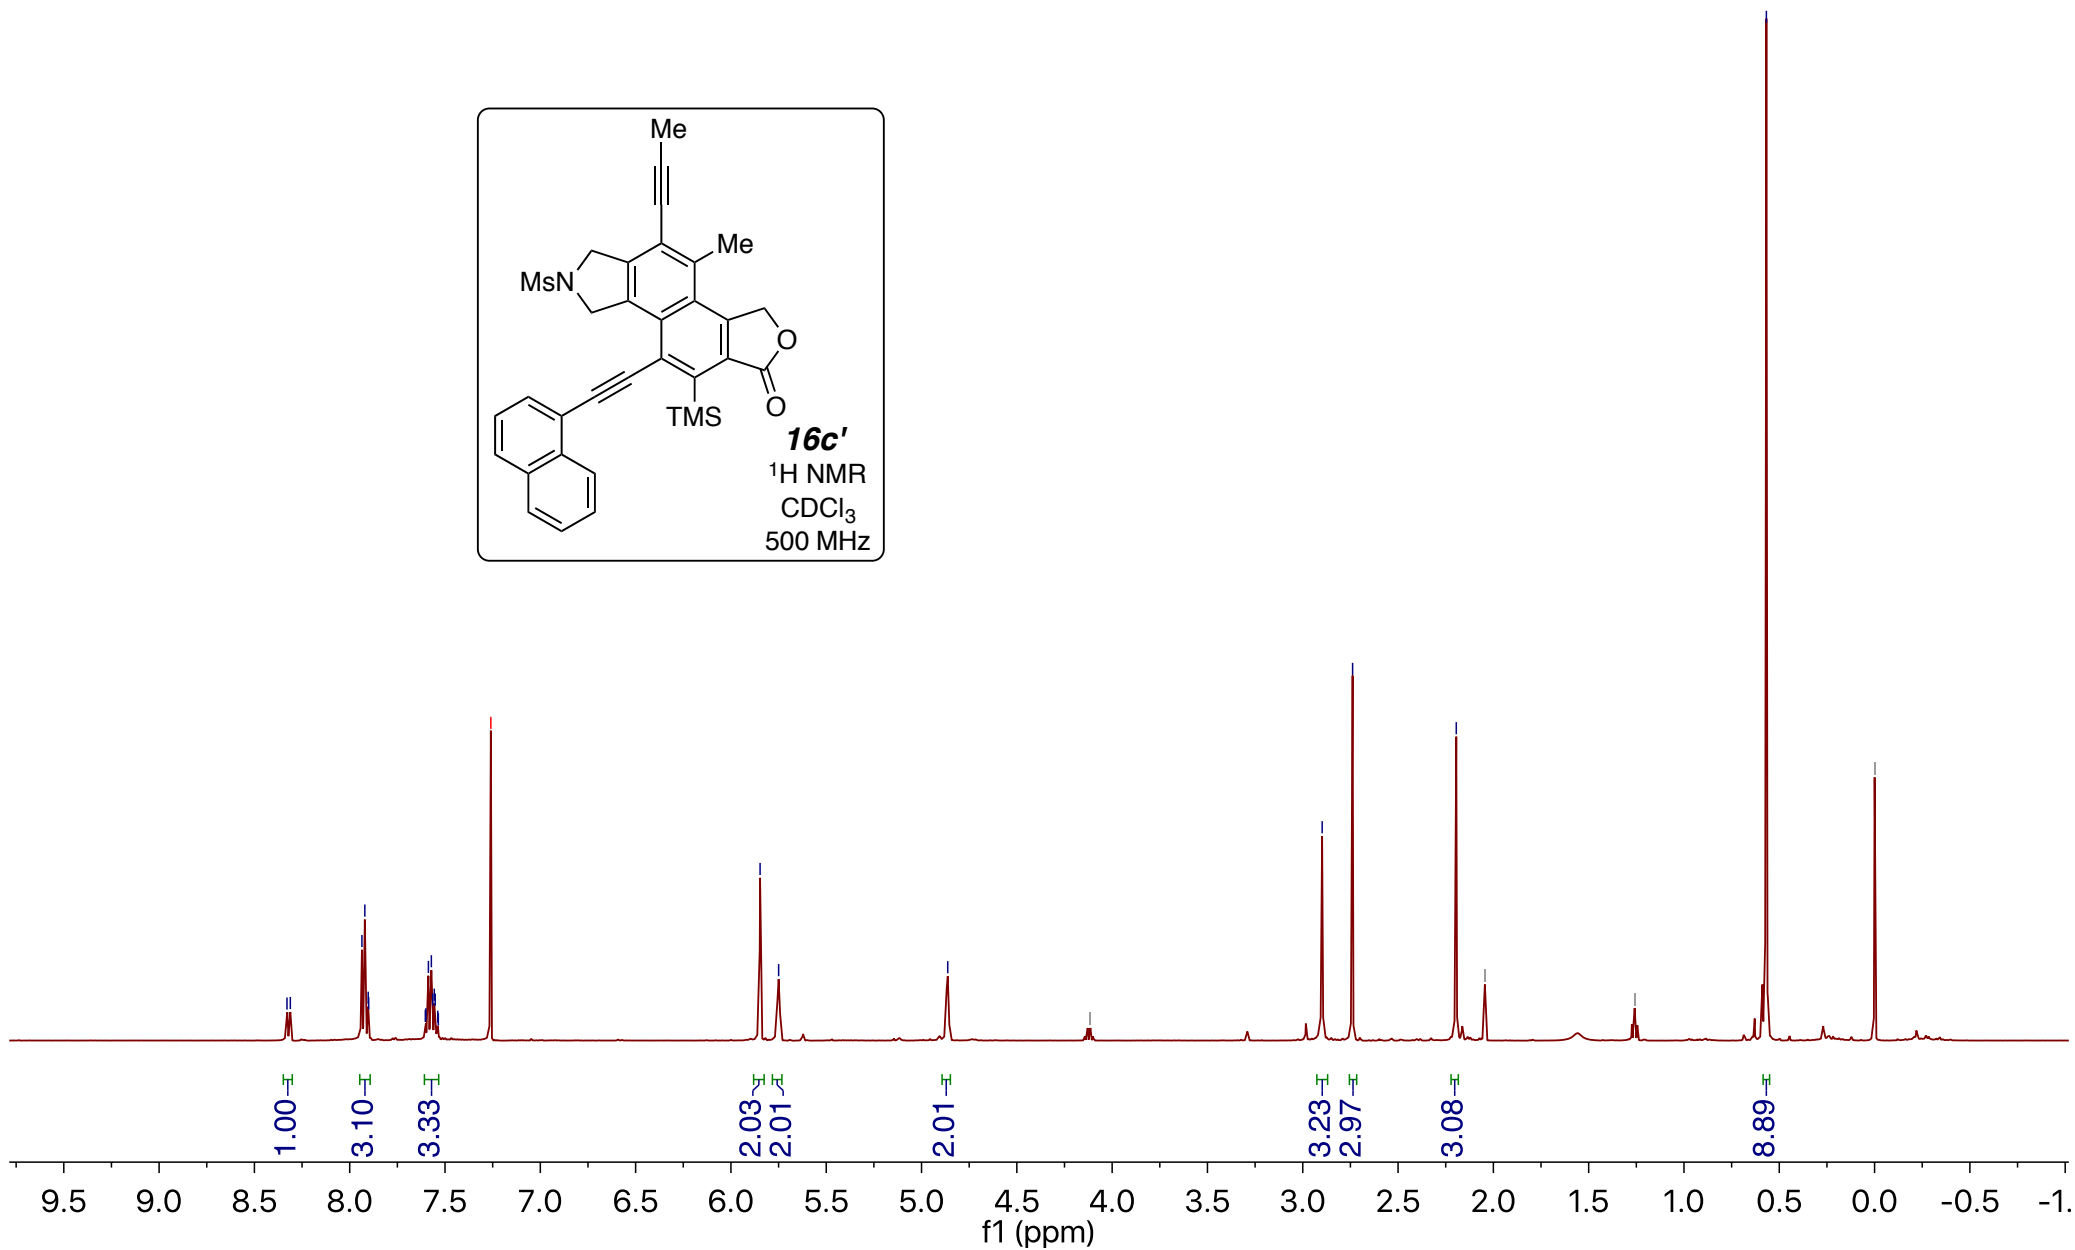

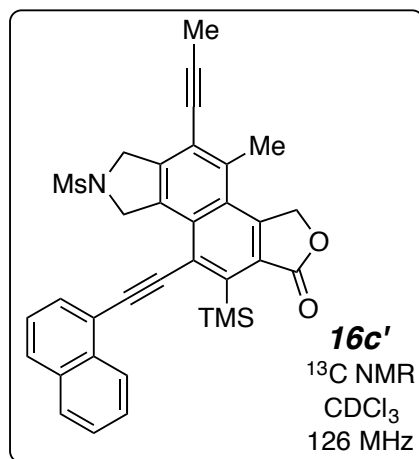

—170.9

—146.5

—143.1

—140.9

—137.9

—133.5

—133.3

—132.2

—131.2

—130.7

—129.9

—129.0

—128.9

—128.8

—128.5

—127.3

—126.8

—125.9

—125.8

—120.4

—120.1

—98.9

—97.5

—95.8

—77.4 CDCl<sub>3</sub>—77.2 CDCl<sub>3</sub>—76.9 CDCl<sub>3</sub>

—75.7

—71.5

—57.8

—54.6

—35.1

—19.8

—4.9

—2.2

—0.1

210 200 190 180 170 160 150 140 130 120 110 100 90 80 70 60 50 40 30 20 10 0 -10

f1 (ppm)

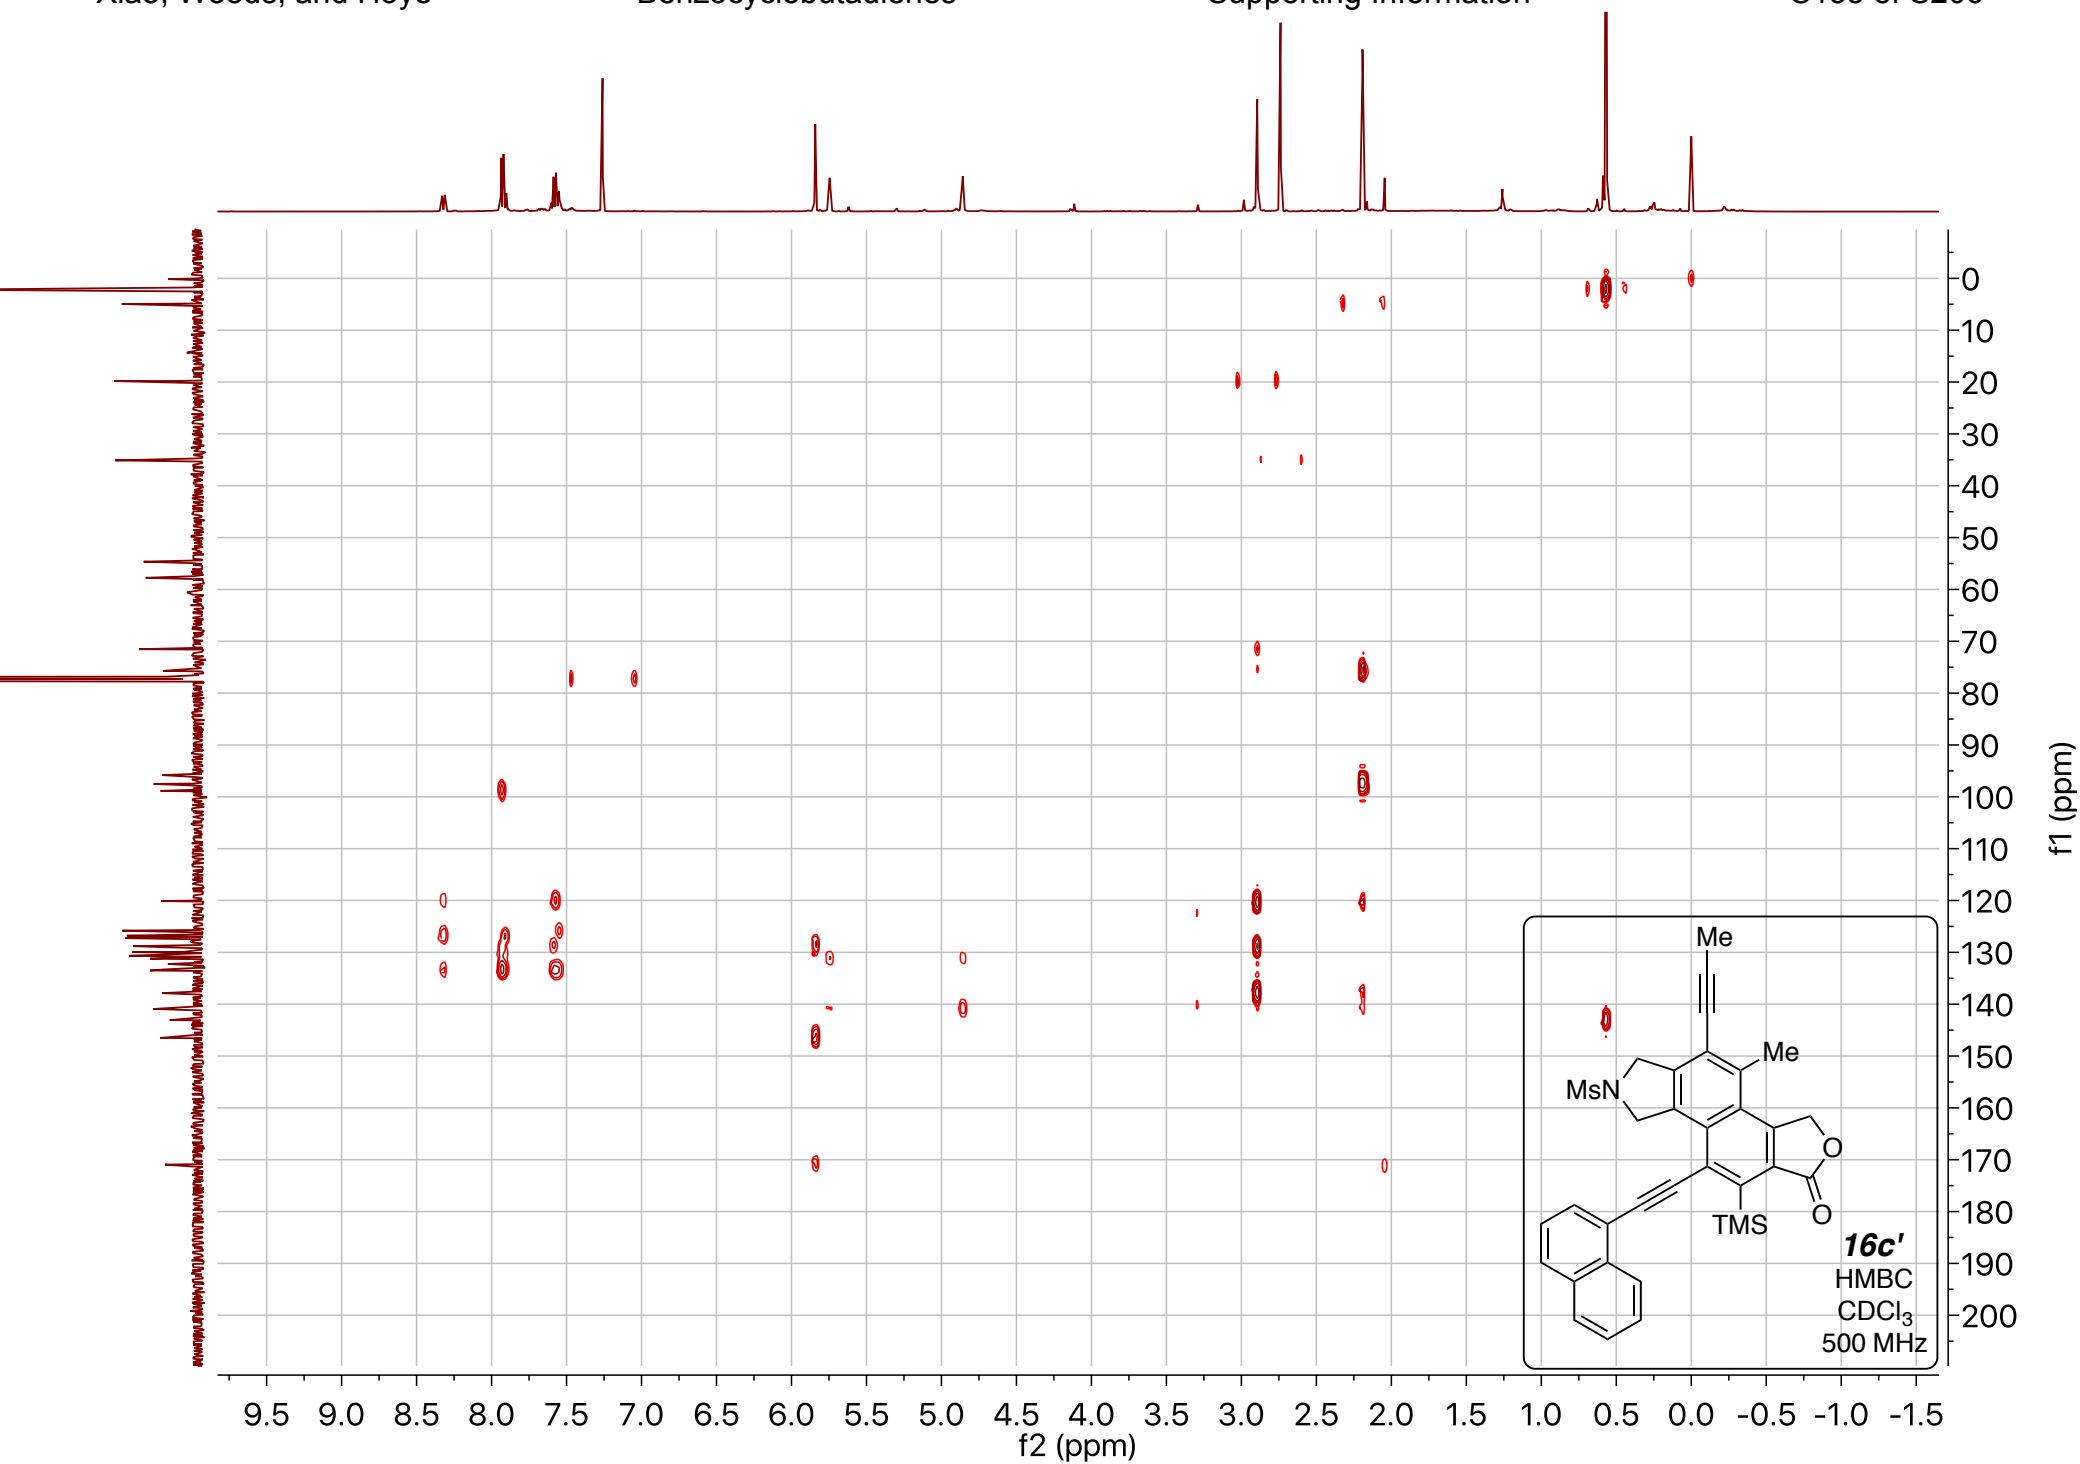

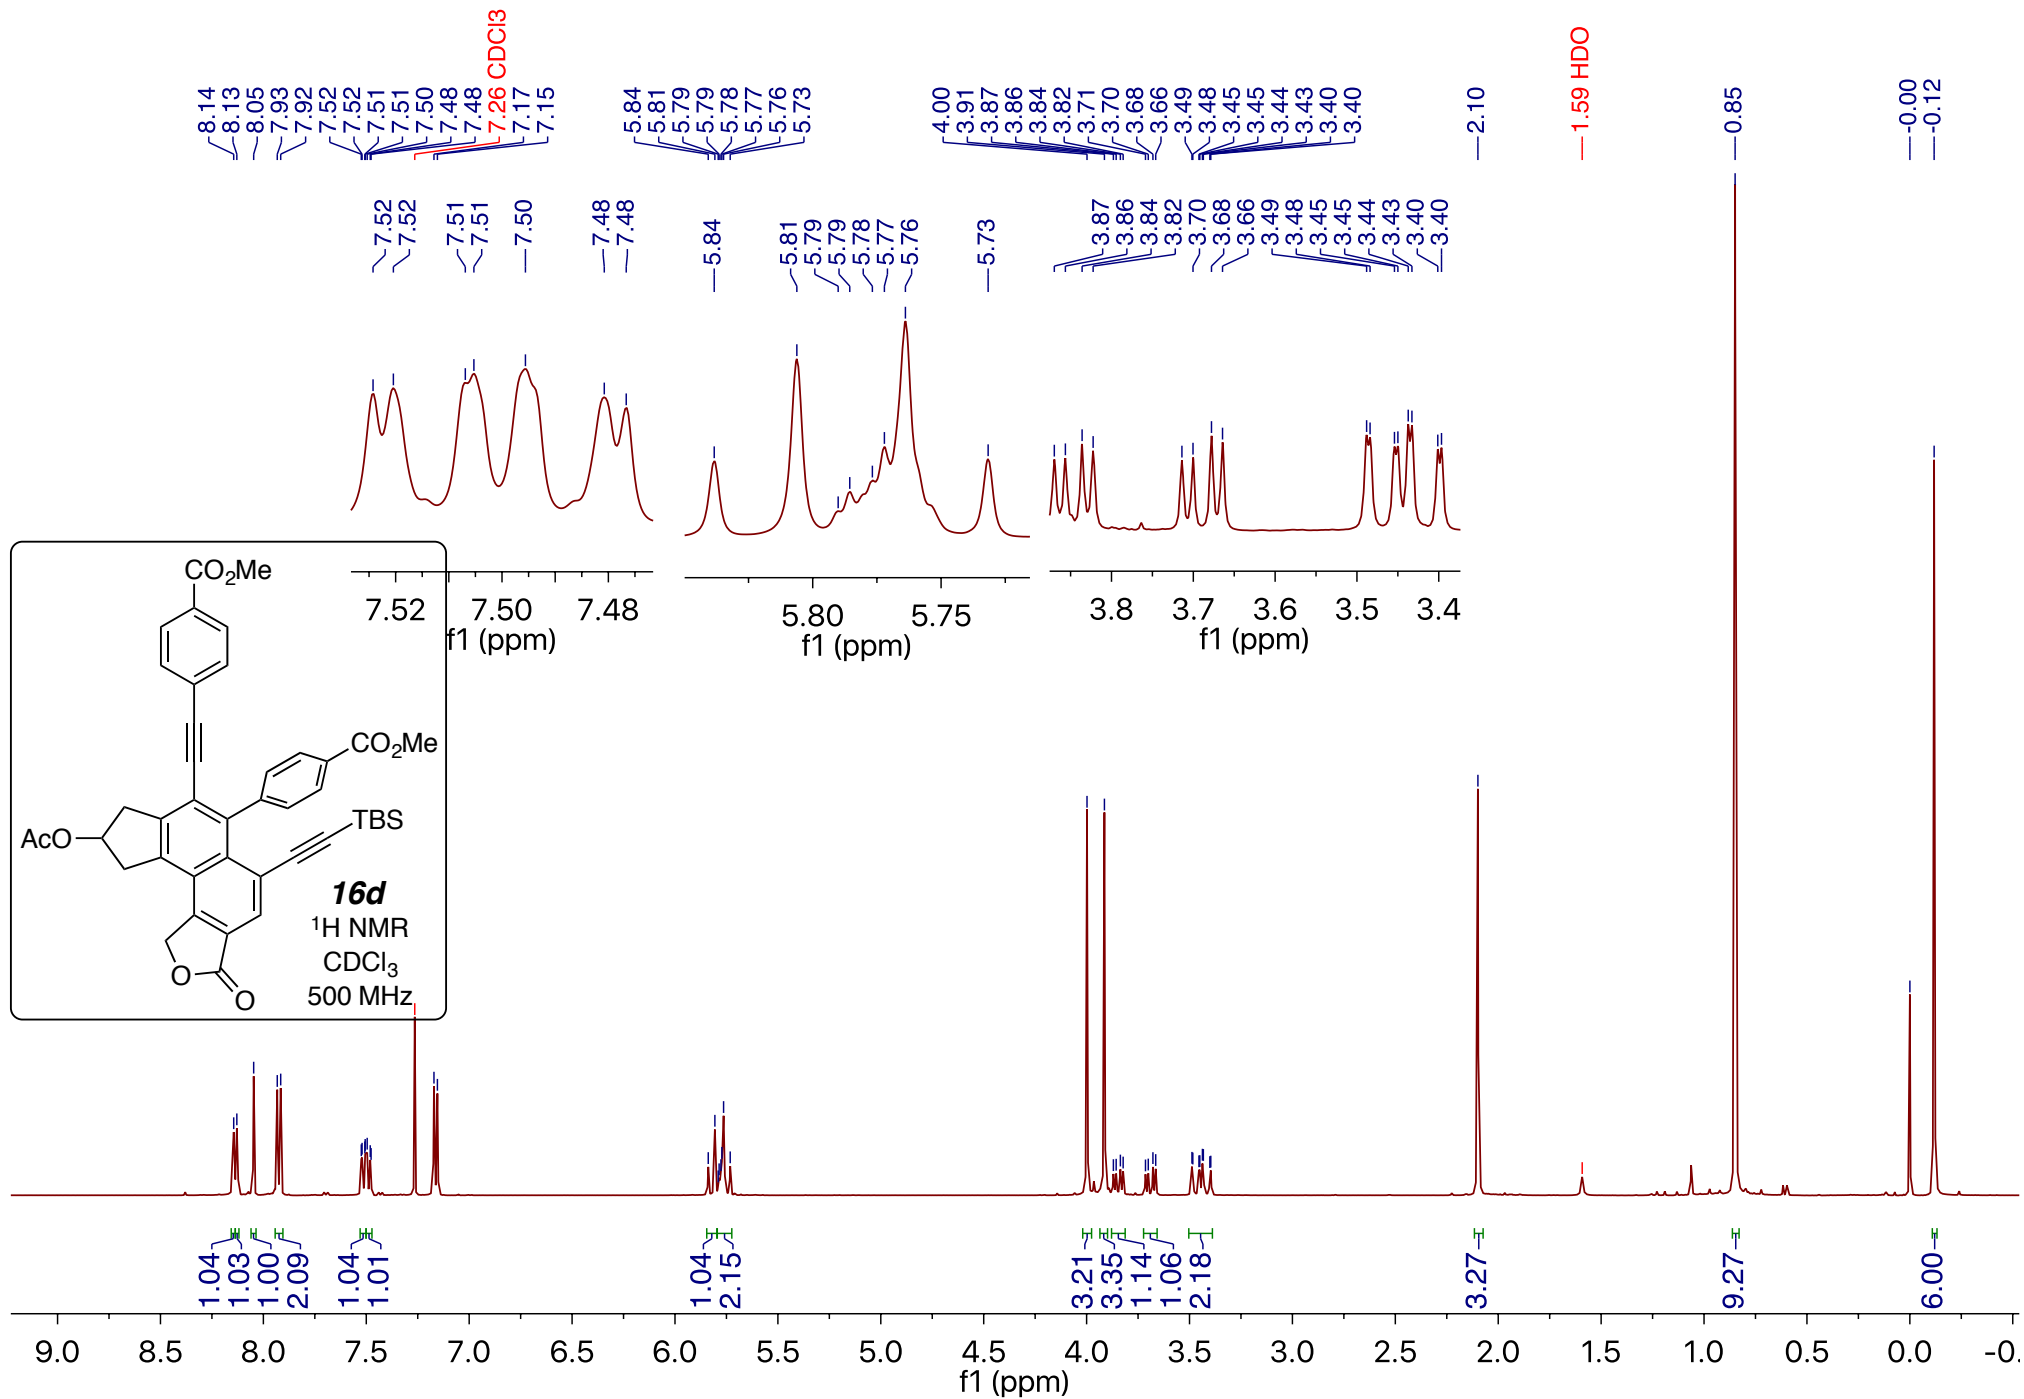



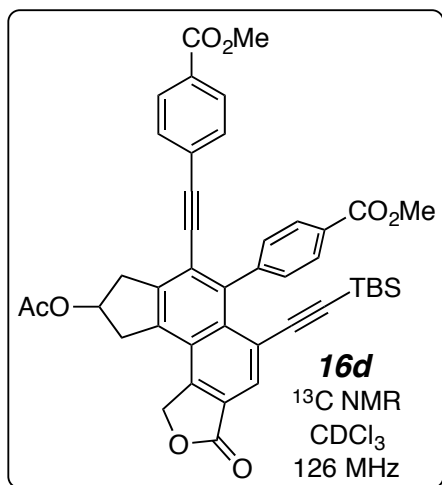

171.0  
 170.4  
 167.2  
 166.4  
 145.5  
 142.8  
 141.9  
 136.2  
 133.0  
 131.6  
 131.5  
 131.5  
 130.9  
 130.2  
 129.9  
 129.6  
 129.1  
 129.0  
 127.0  
 125.7  
 124.4  
 123.8  
 123.1

105.5  
 103.6  
 99.1

89.5

77.4 CDCl<sub>3</sub>  
 77.2 CDCl<sub>3</sub>  
 76.9 CDCl<sub>3</sub>

73.7  
 70.8

52.4  
 52.4

41.4  
 40.5

26.3  
 21.4  
 17.1

0.1  
 -4.9

131.6  
 131.5  
 131.5

130.9

130.2

129.9

129.6

129.1  
 129.0

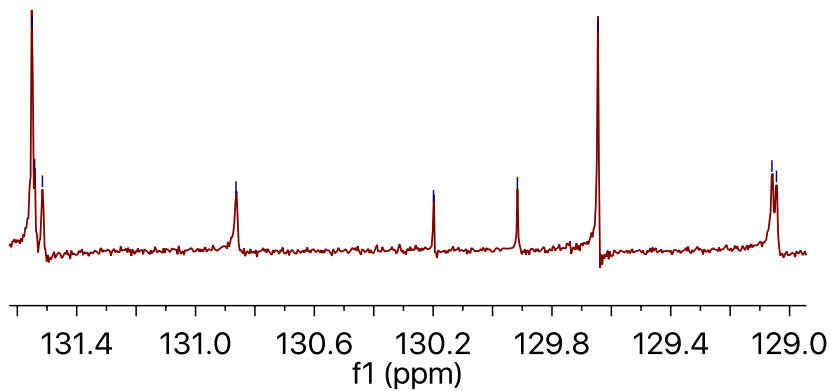

210 200 190 180 170 160 150 140 130 120 110 100 90 80 70 60 50 40 30 20 10 0 -10

f1 (ppm)

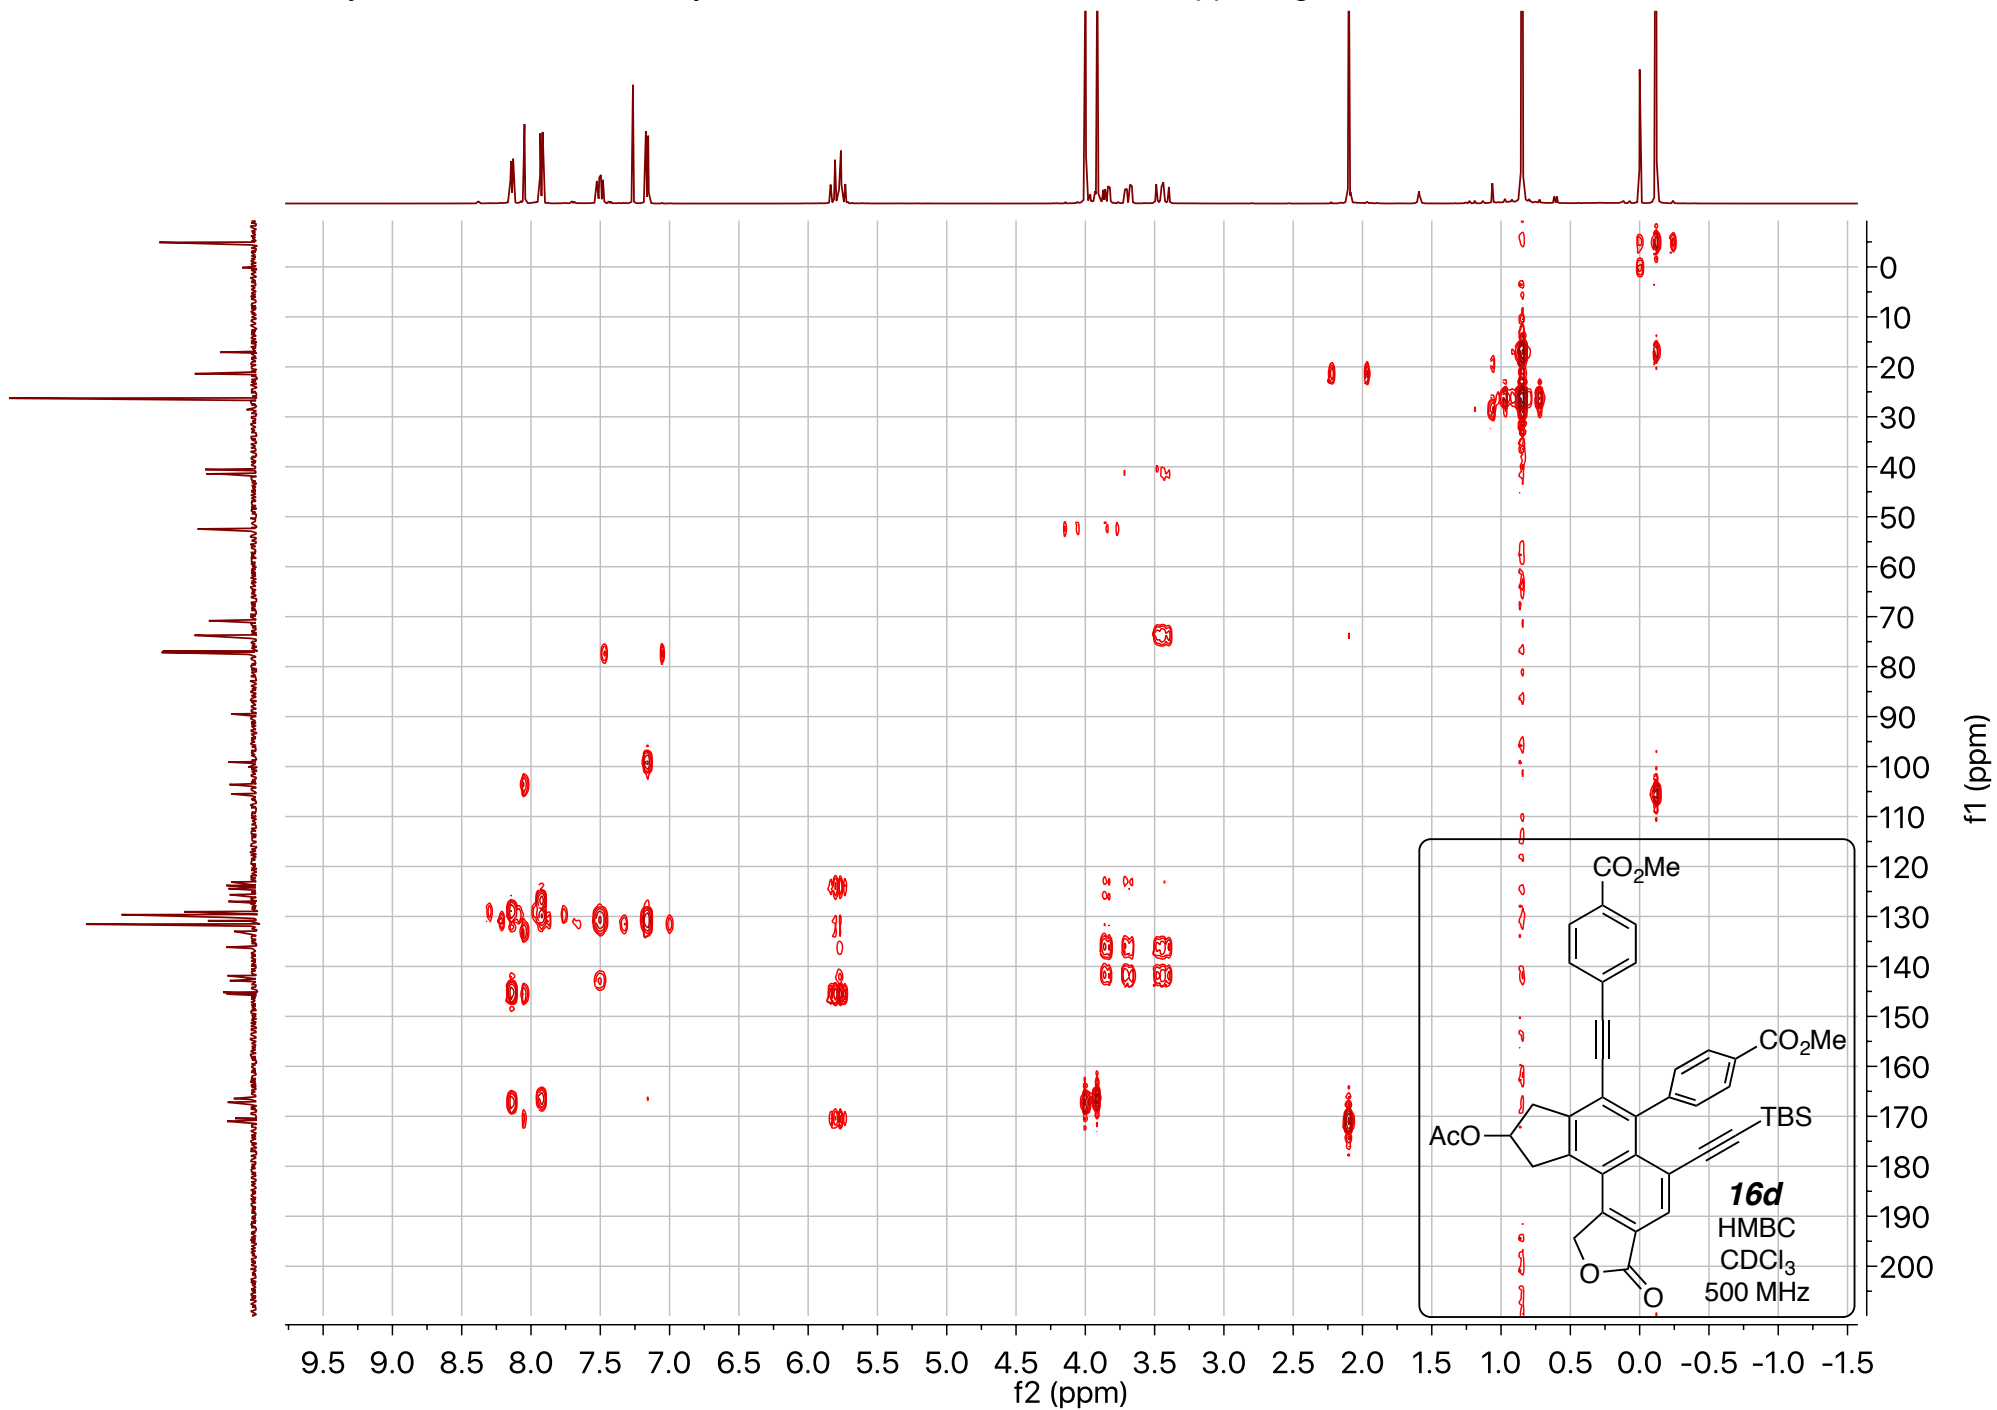

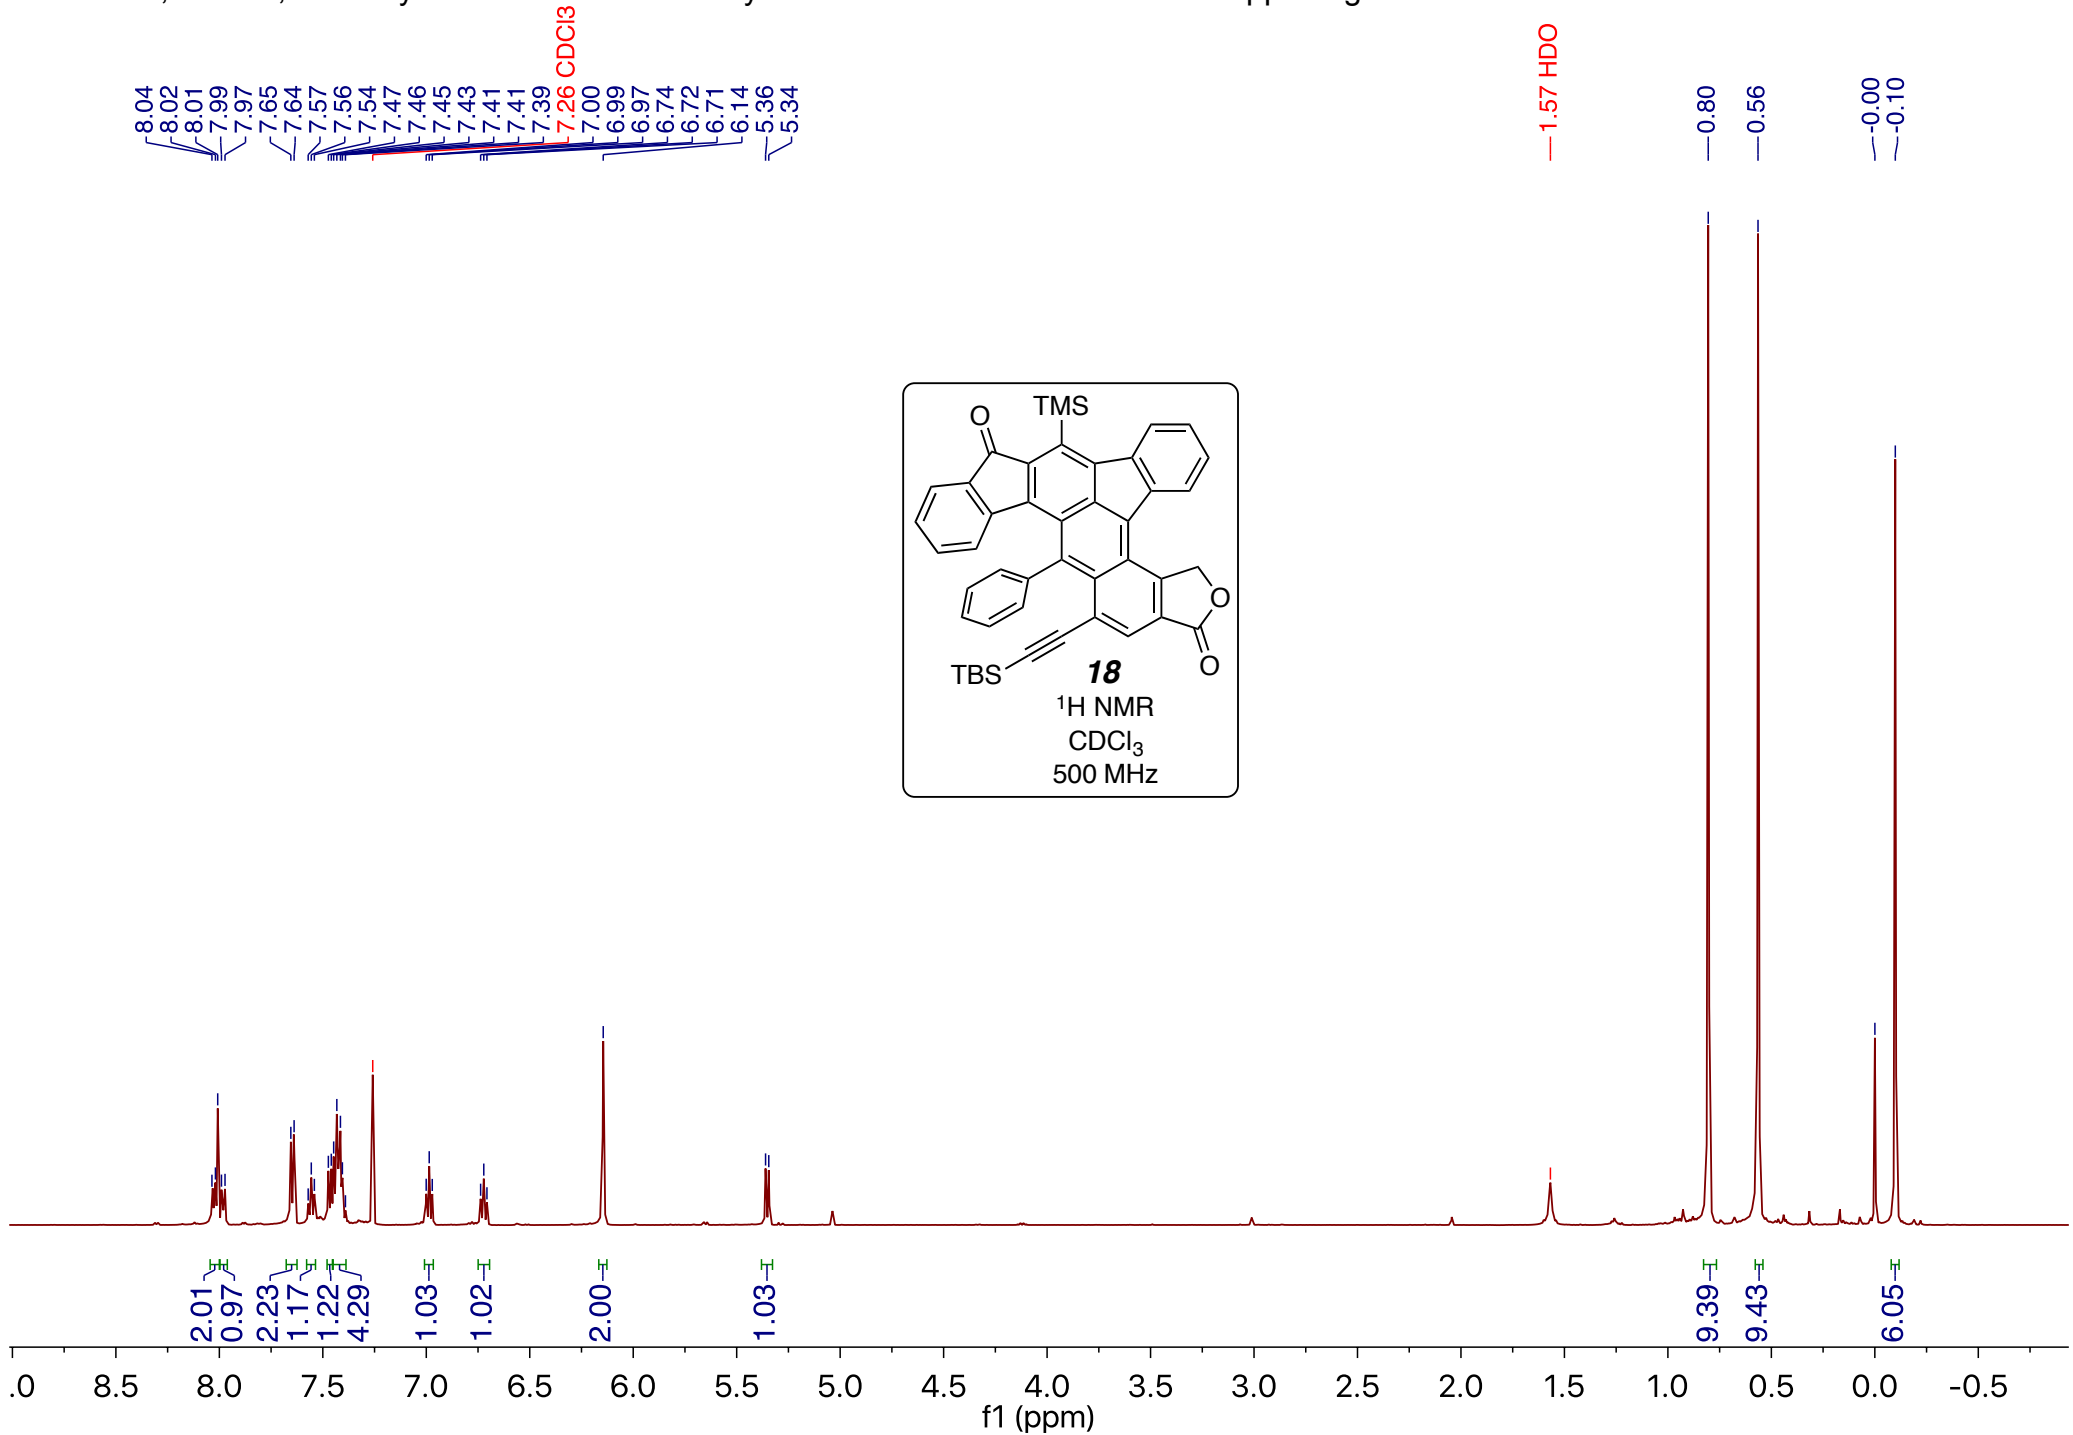

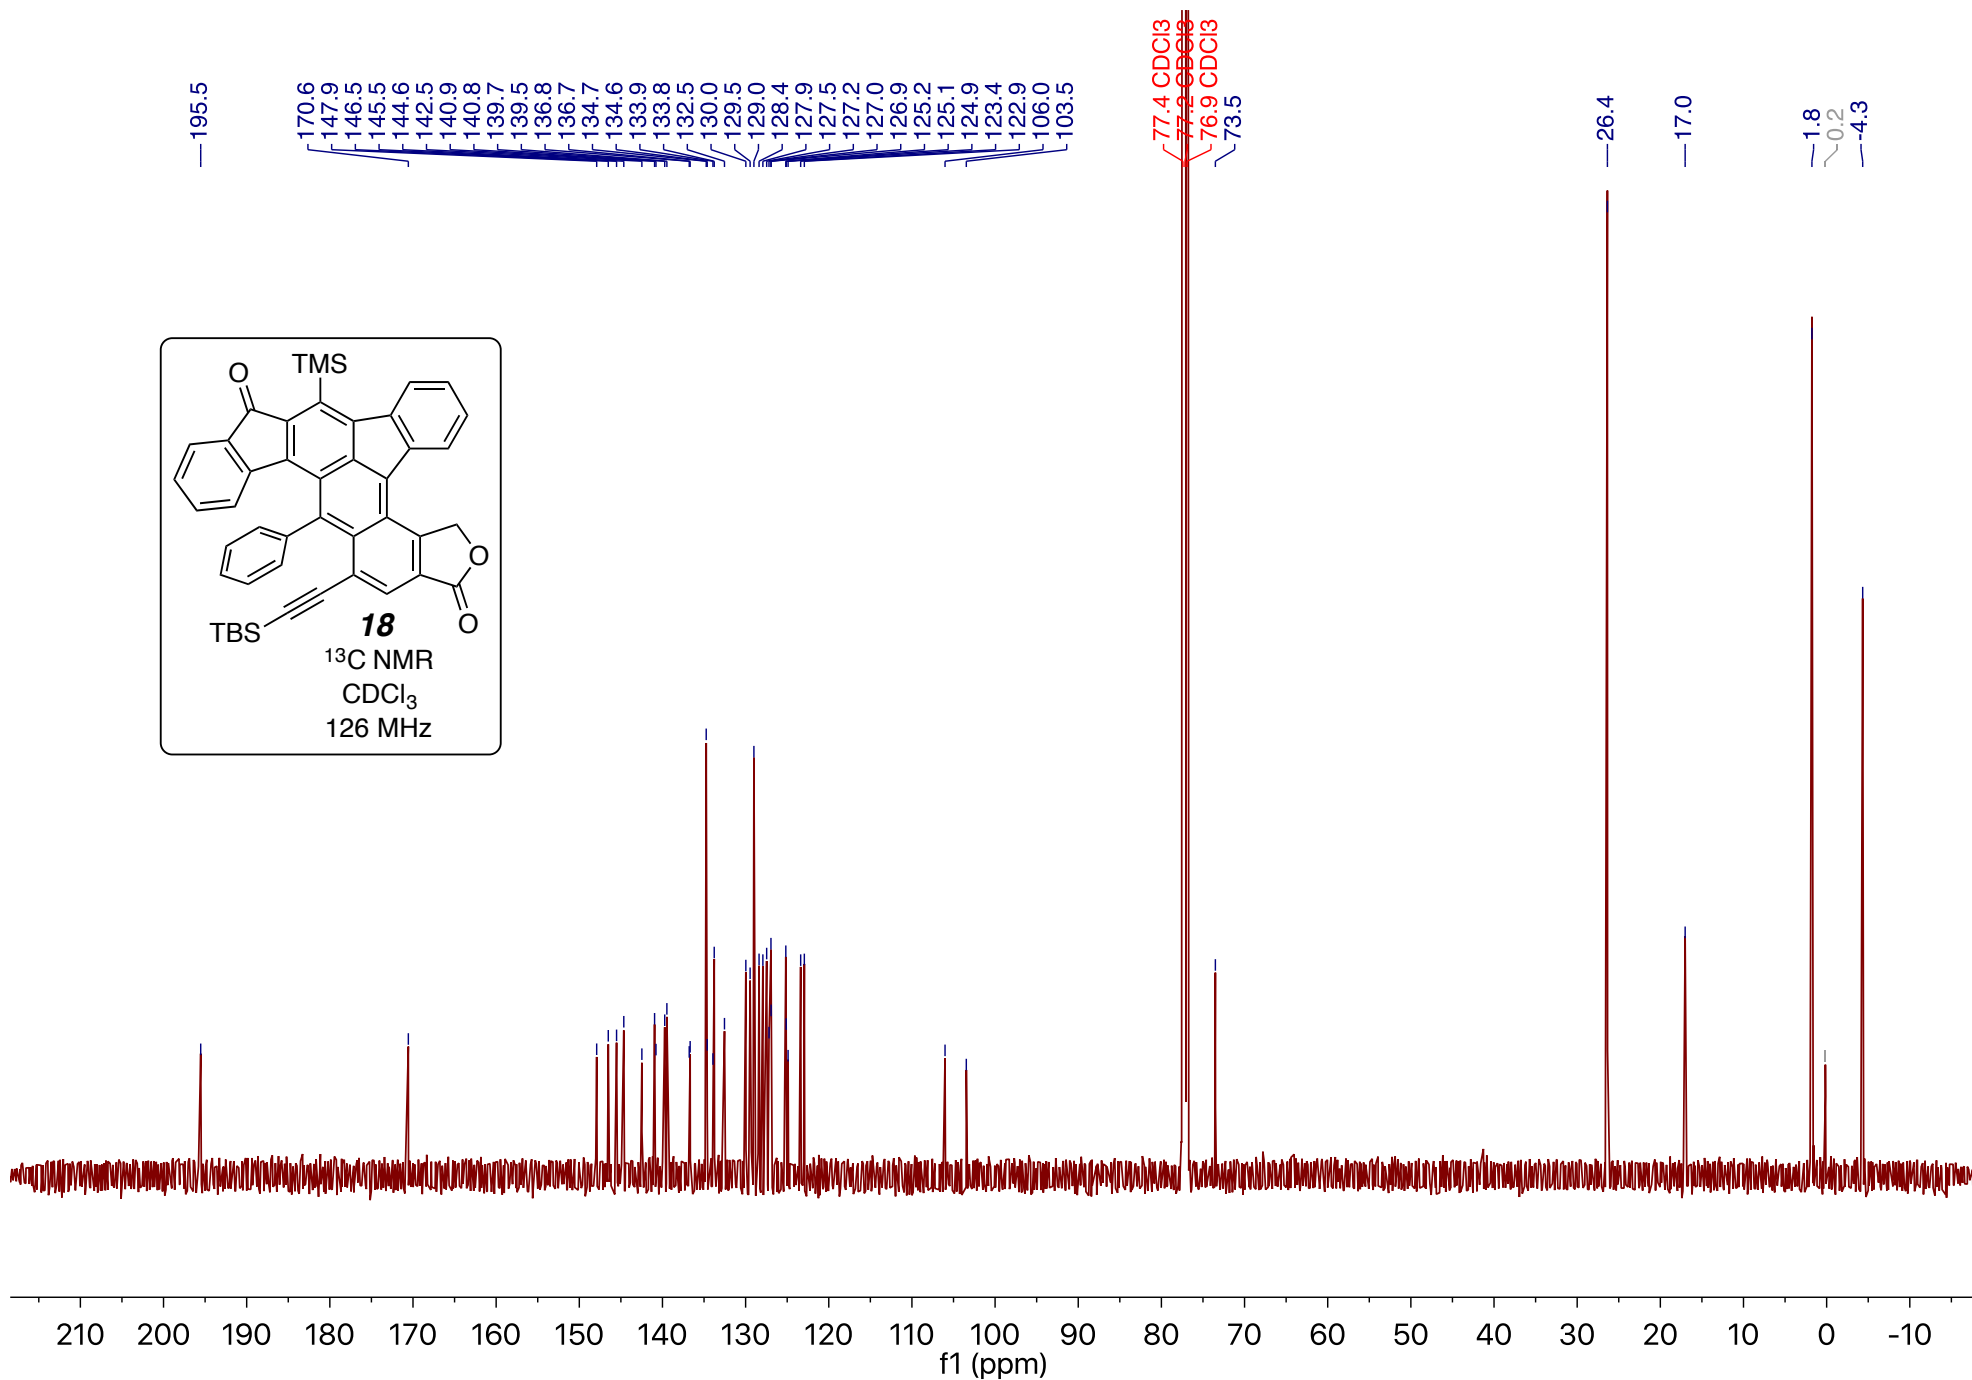

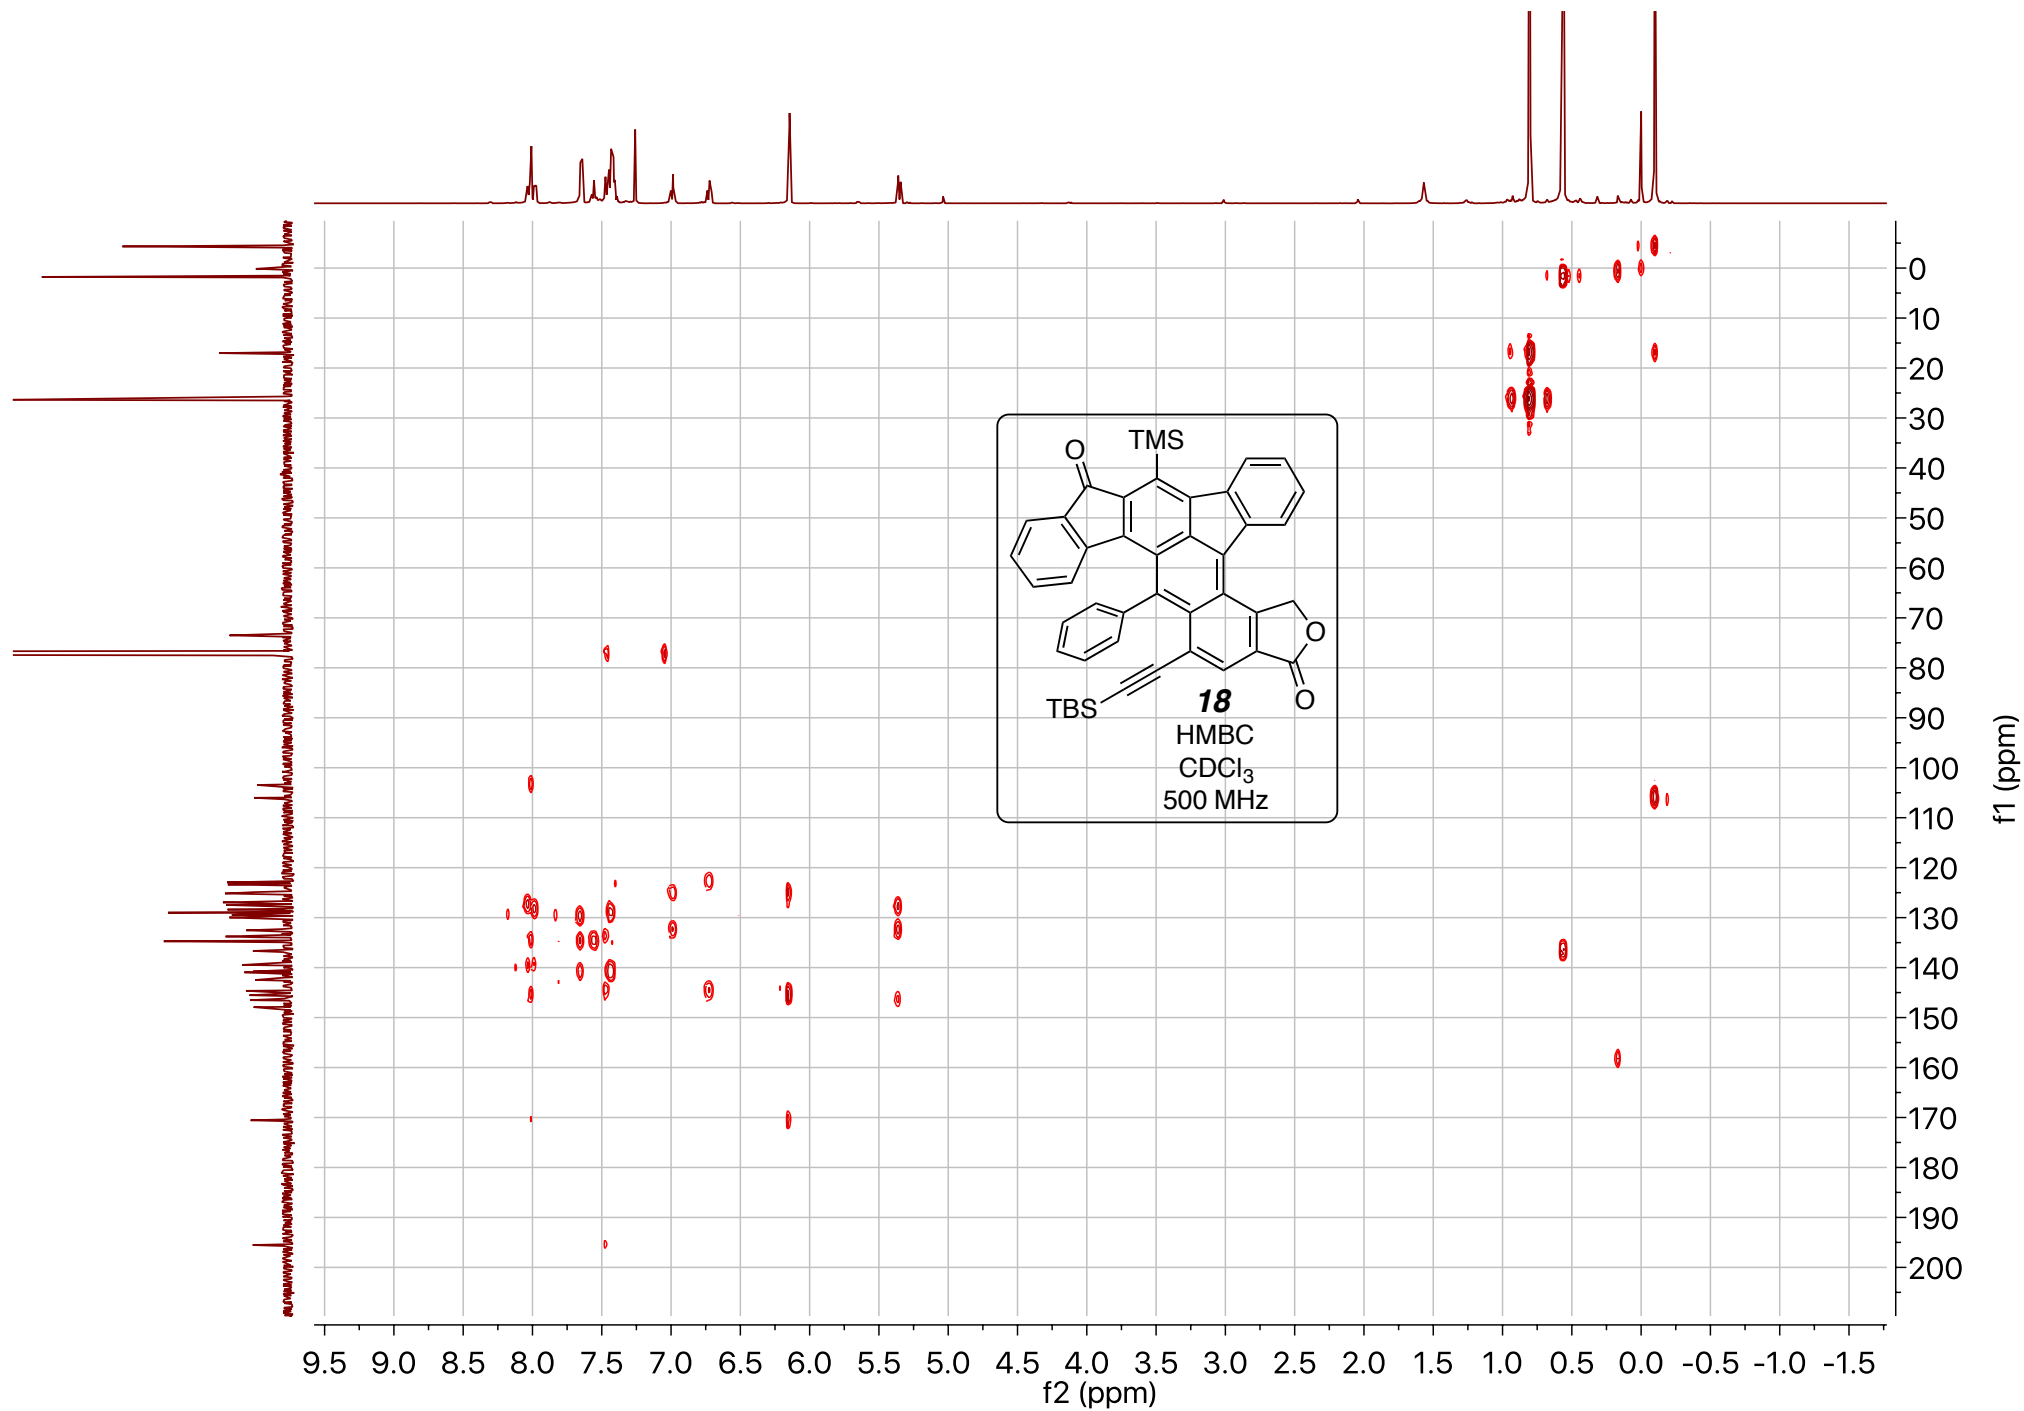

—8.13  
—7.72  
—7.26 CDCl<sub>3</sub>  
—7.13

—5.83

—4.02  
—3.93

—2.77

—2.05 EtOAc

—1.57 H<sub>2</sub>O

—0.87

—0.47

—0.06  
—0.00

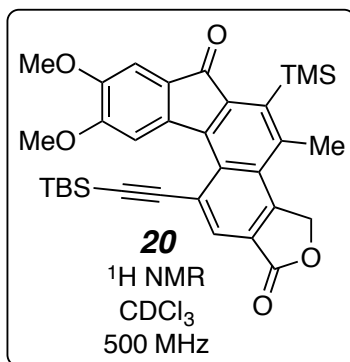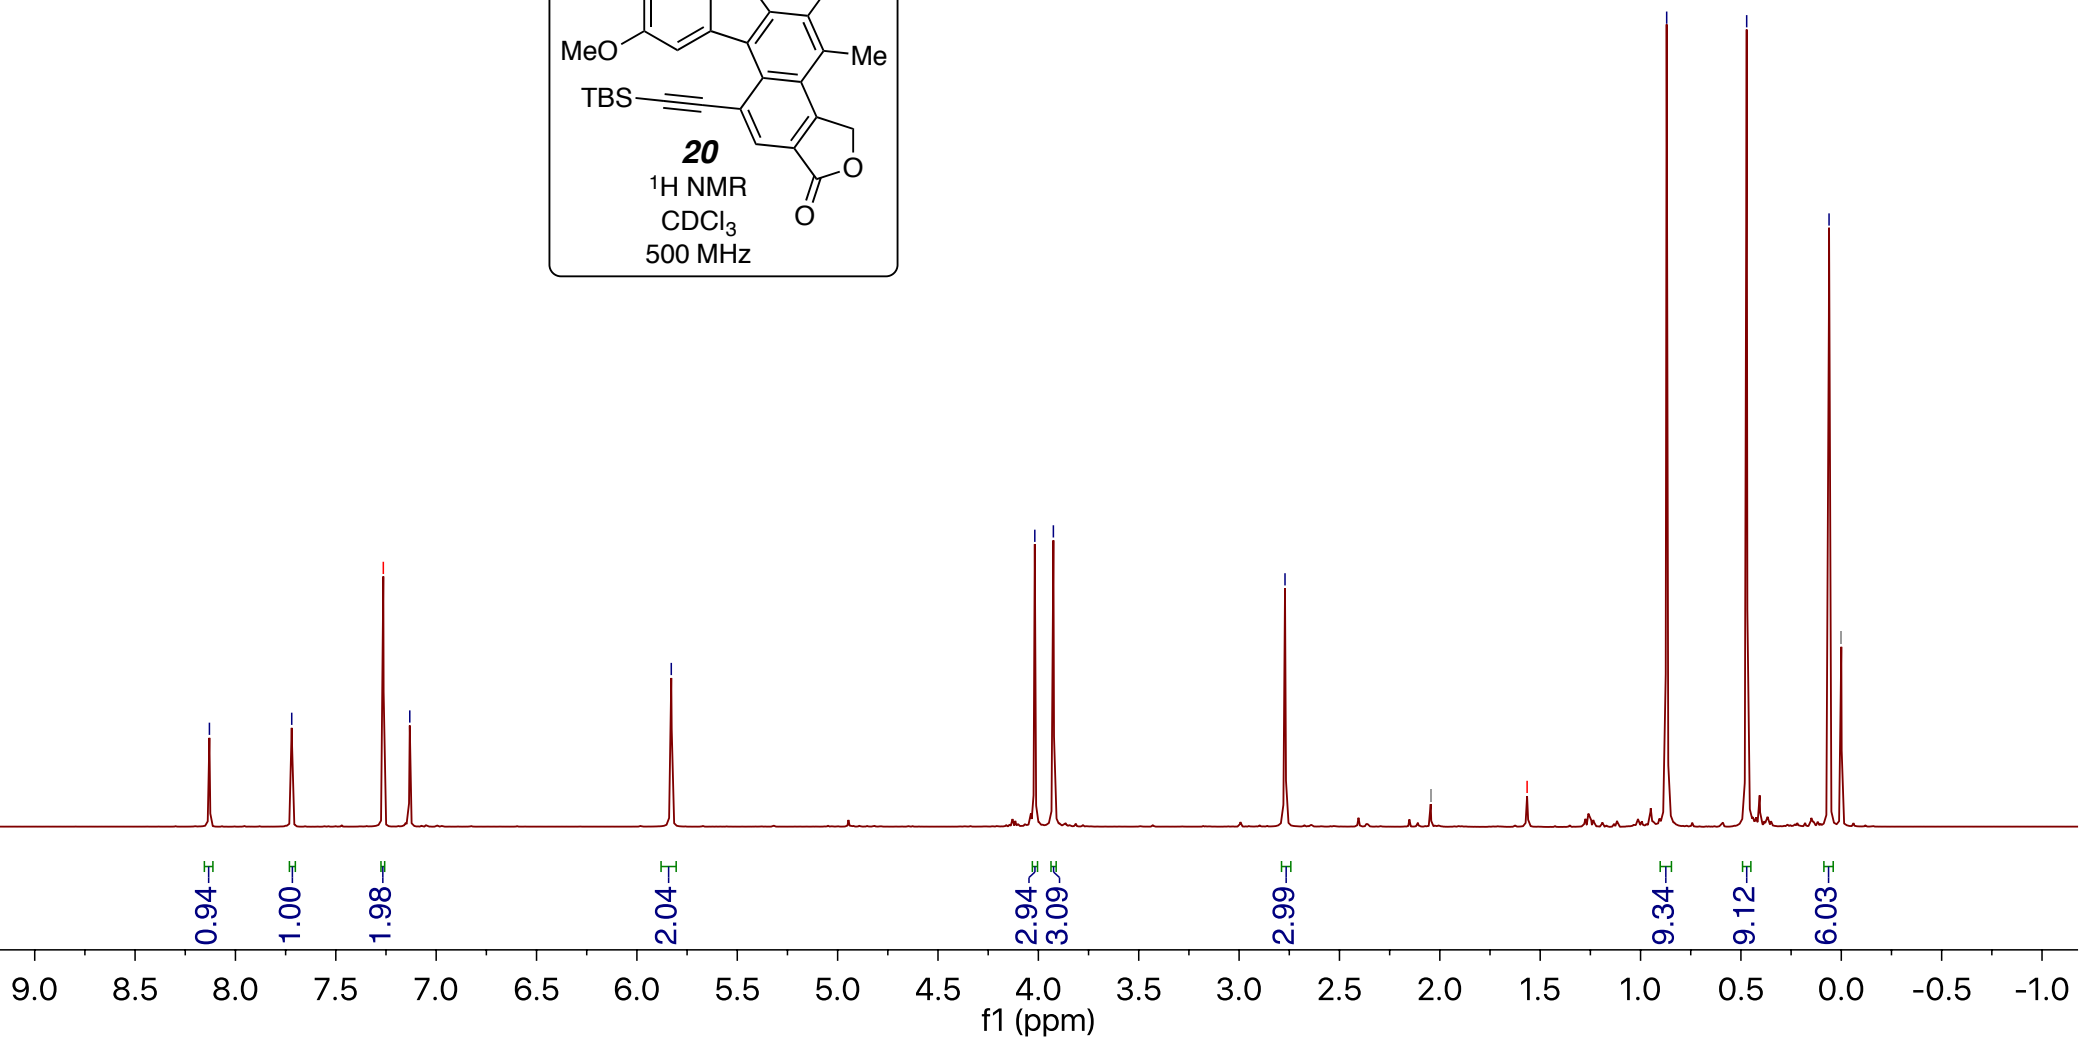

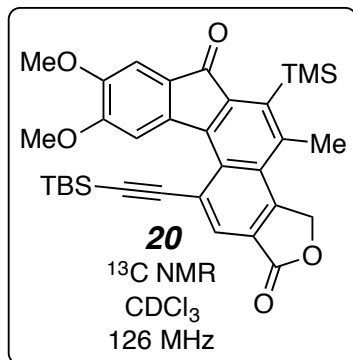

—194.5

—170.4

152.7

149.3

147.0

143.7

141.7

140.5

139.9

139.2

132.3

131.7

130.0

125.6

125.1

122.2

112.1

106.9

106.2

104.9

77.4  $\text{CDCl}_3$ 77.2  $\text{CDCl}_3$ 76.9  $\text{CDCl}_3$ 

72.7

56.6

56.4

26.2

24.3

—16.9

2.4

0.1

-4.9

210 200 190 180 170 160 150 140 130 120 110 100 90 80 70 60 50 40 30 20 10 0 -10  
f1 (ppm)

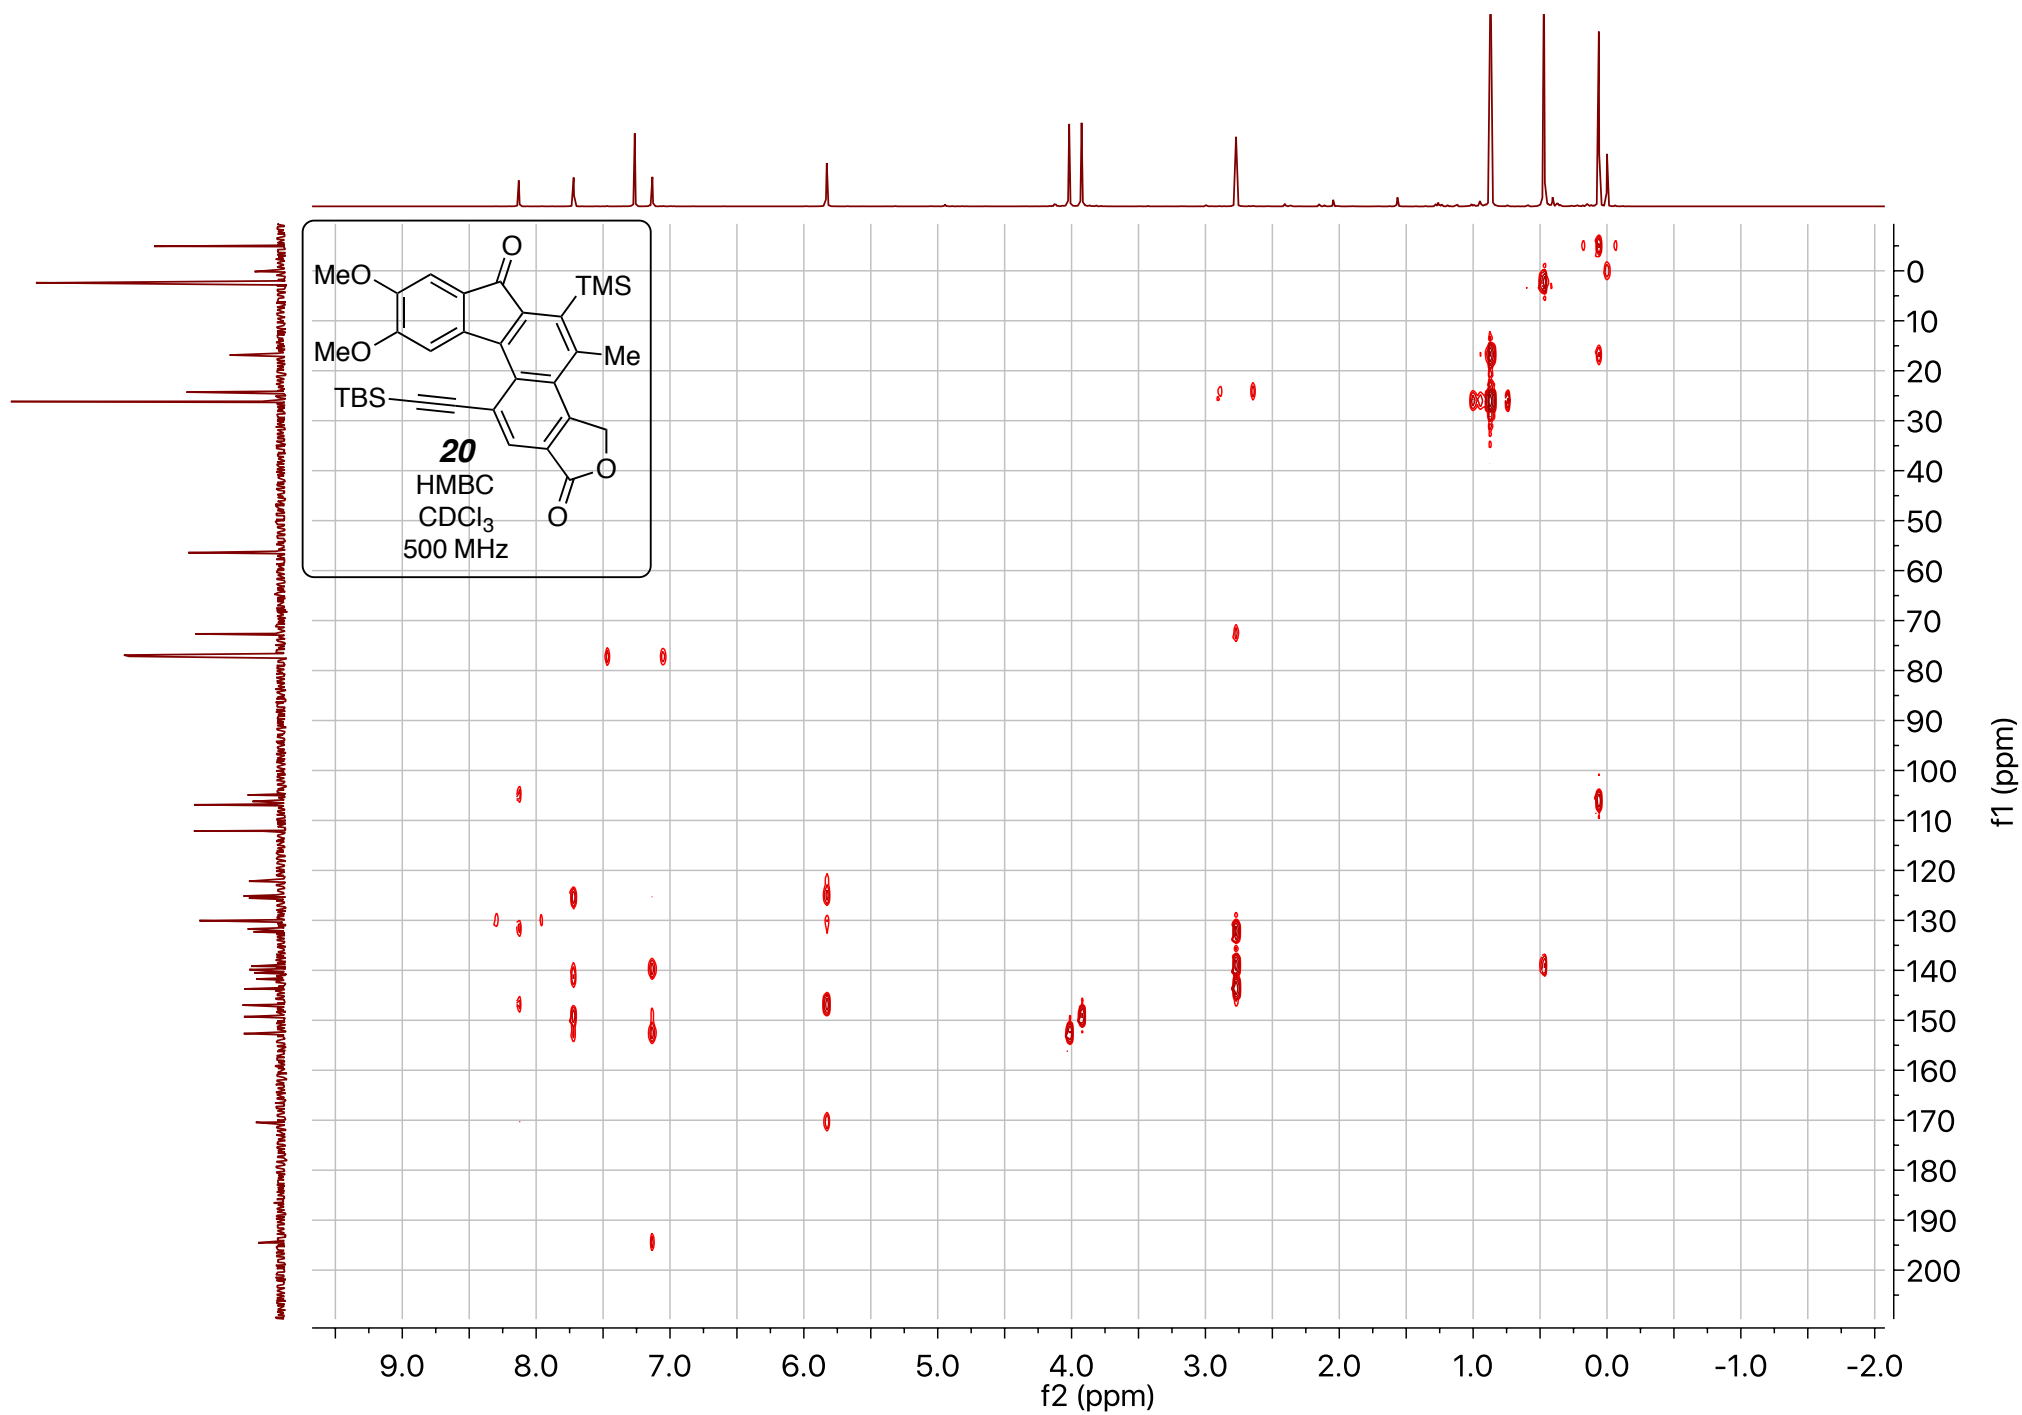



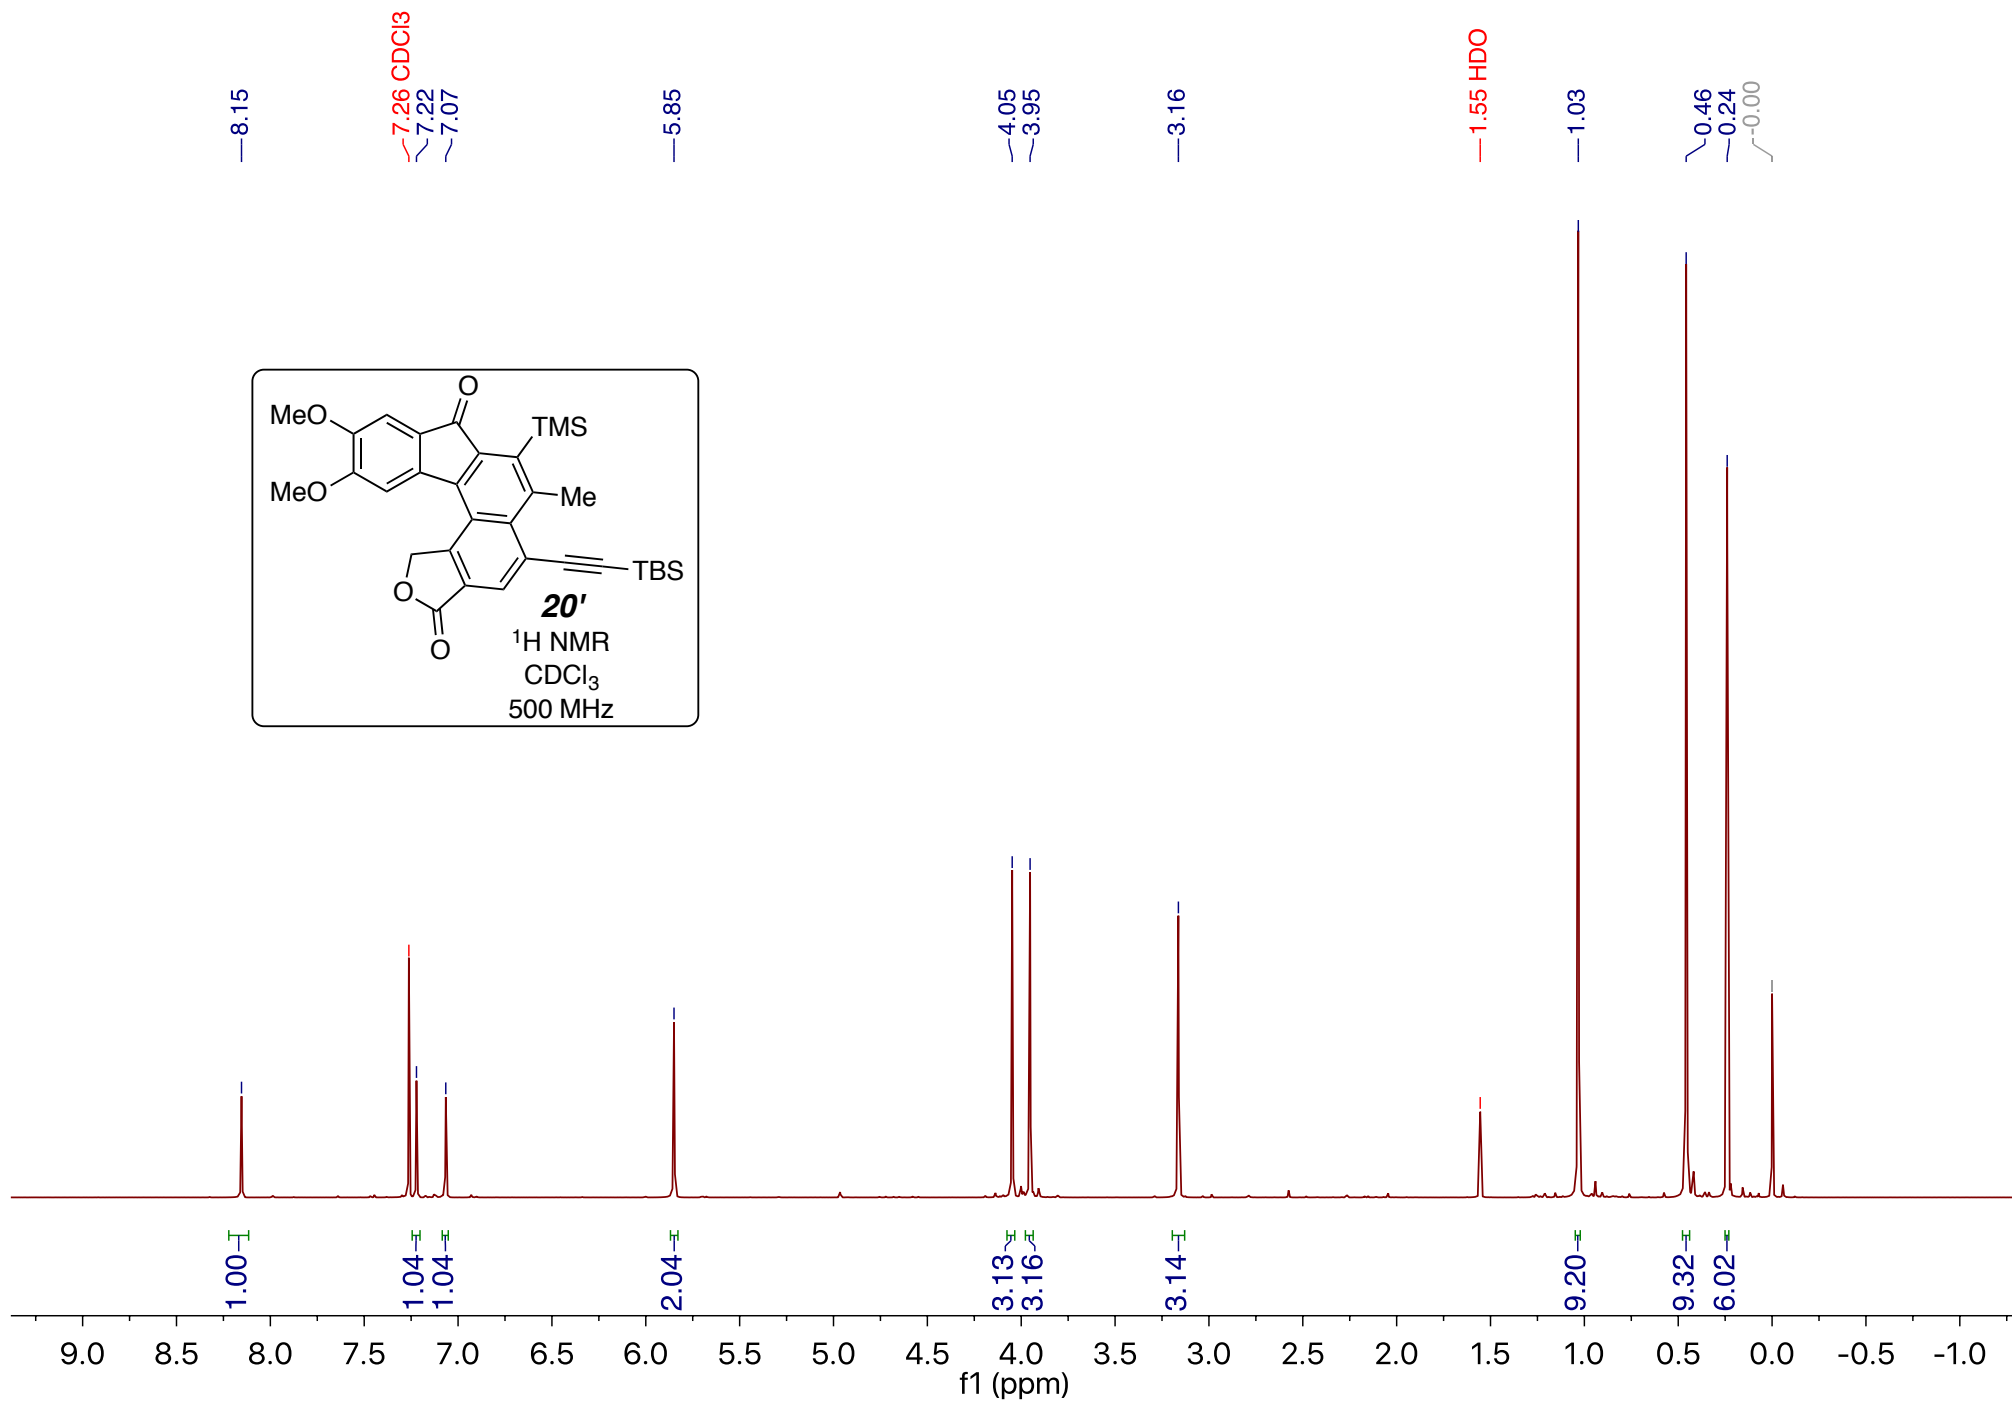

—193.9

—170.0

154.0

149.8

147.1

144.3

142.1

141.0

139.7

139.0

131.5

126.9

124.4

124.0

123.8

108.2

107.2

106.5

103.3

77.4 CDCl<sub>3</sub>77.2 CDCl<sub>3</sub>76.9 CDCl<sub>3</sub>

72.3

56.8

56.4

28.6

26.4

—17.1

~2.5

~0.1

~4.7

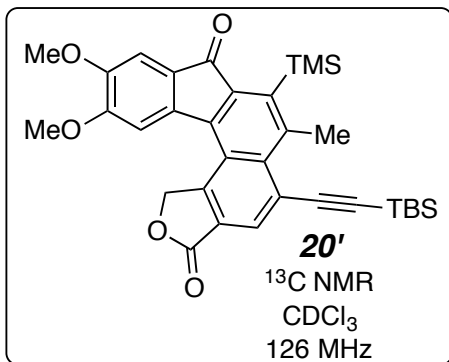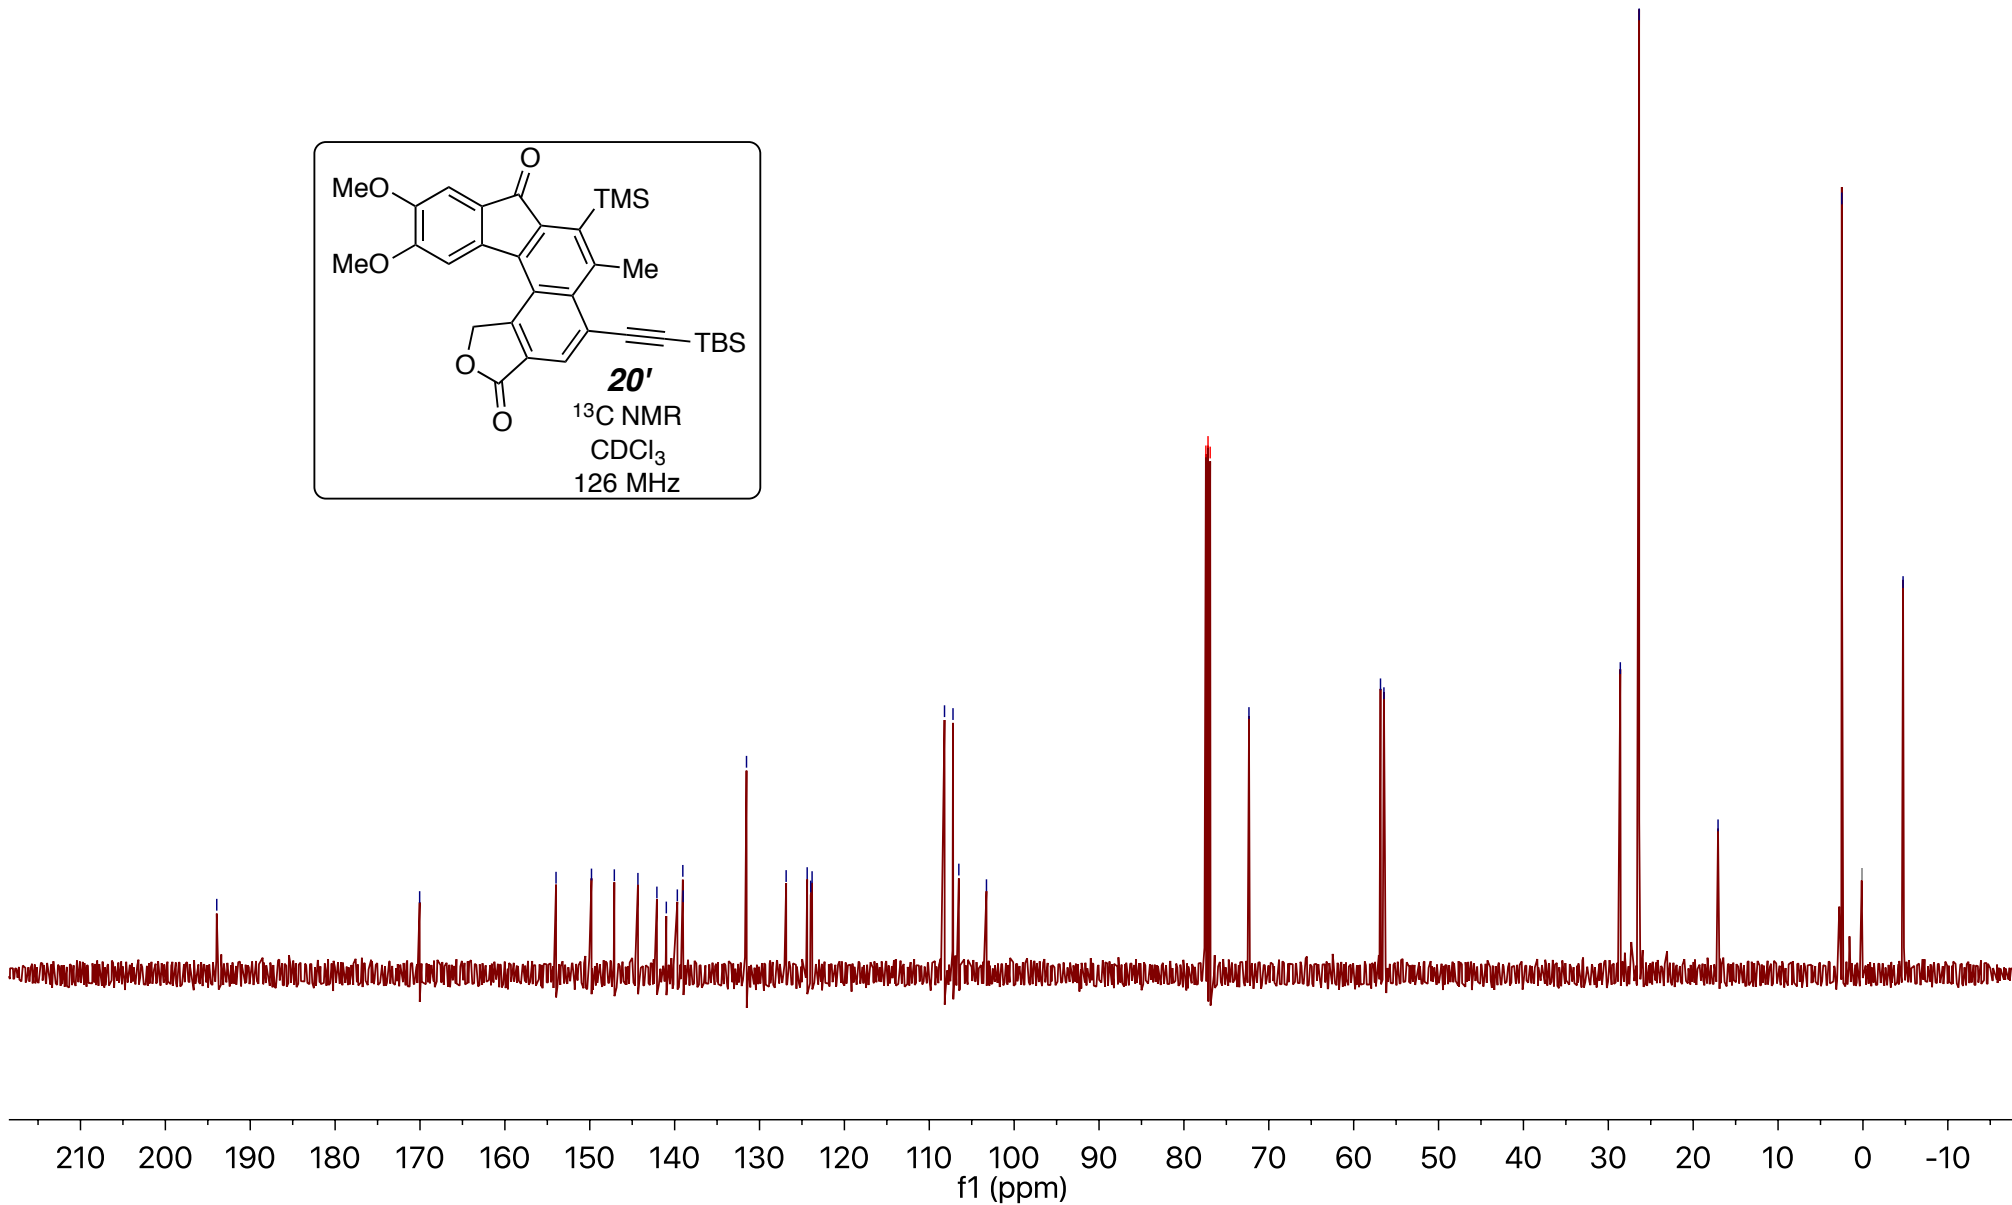

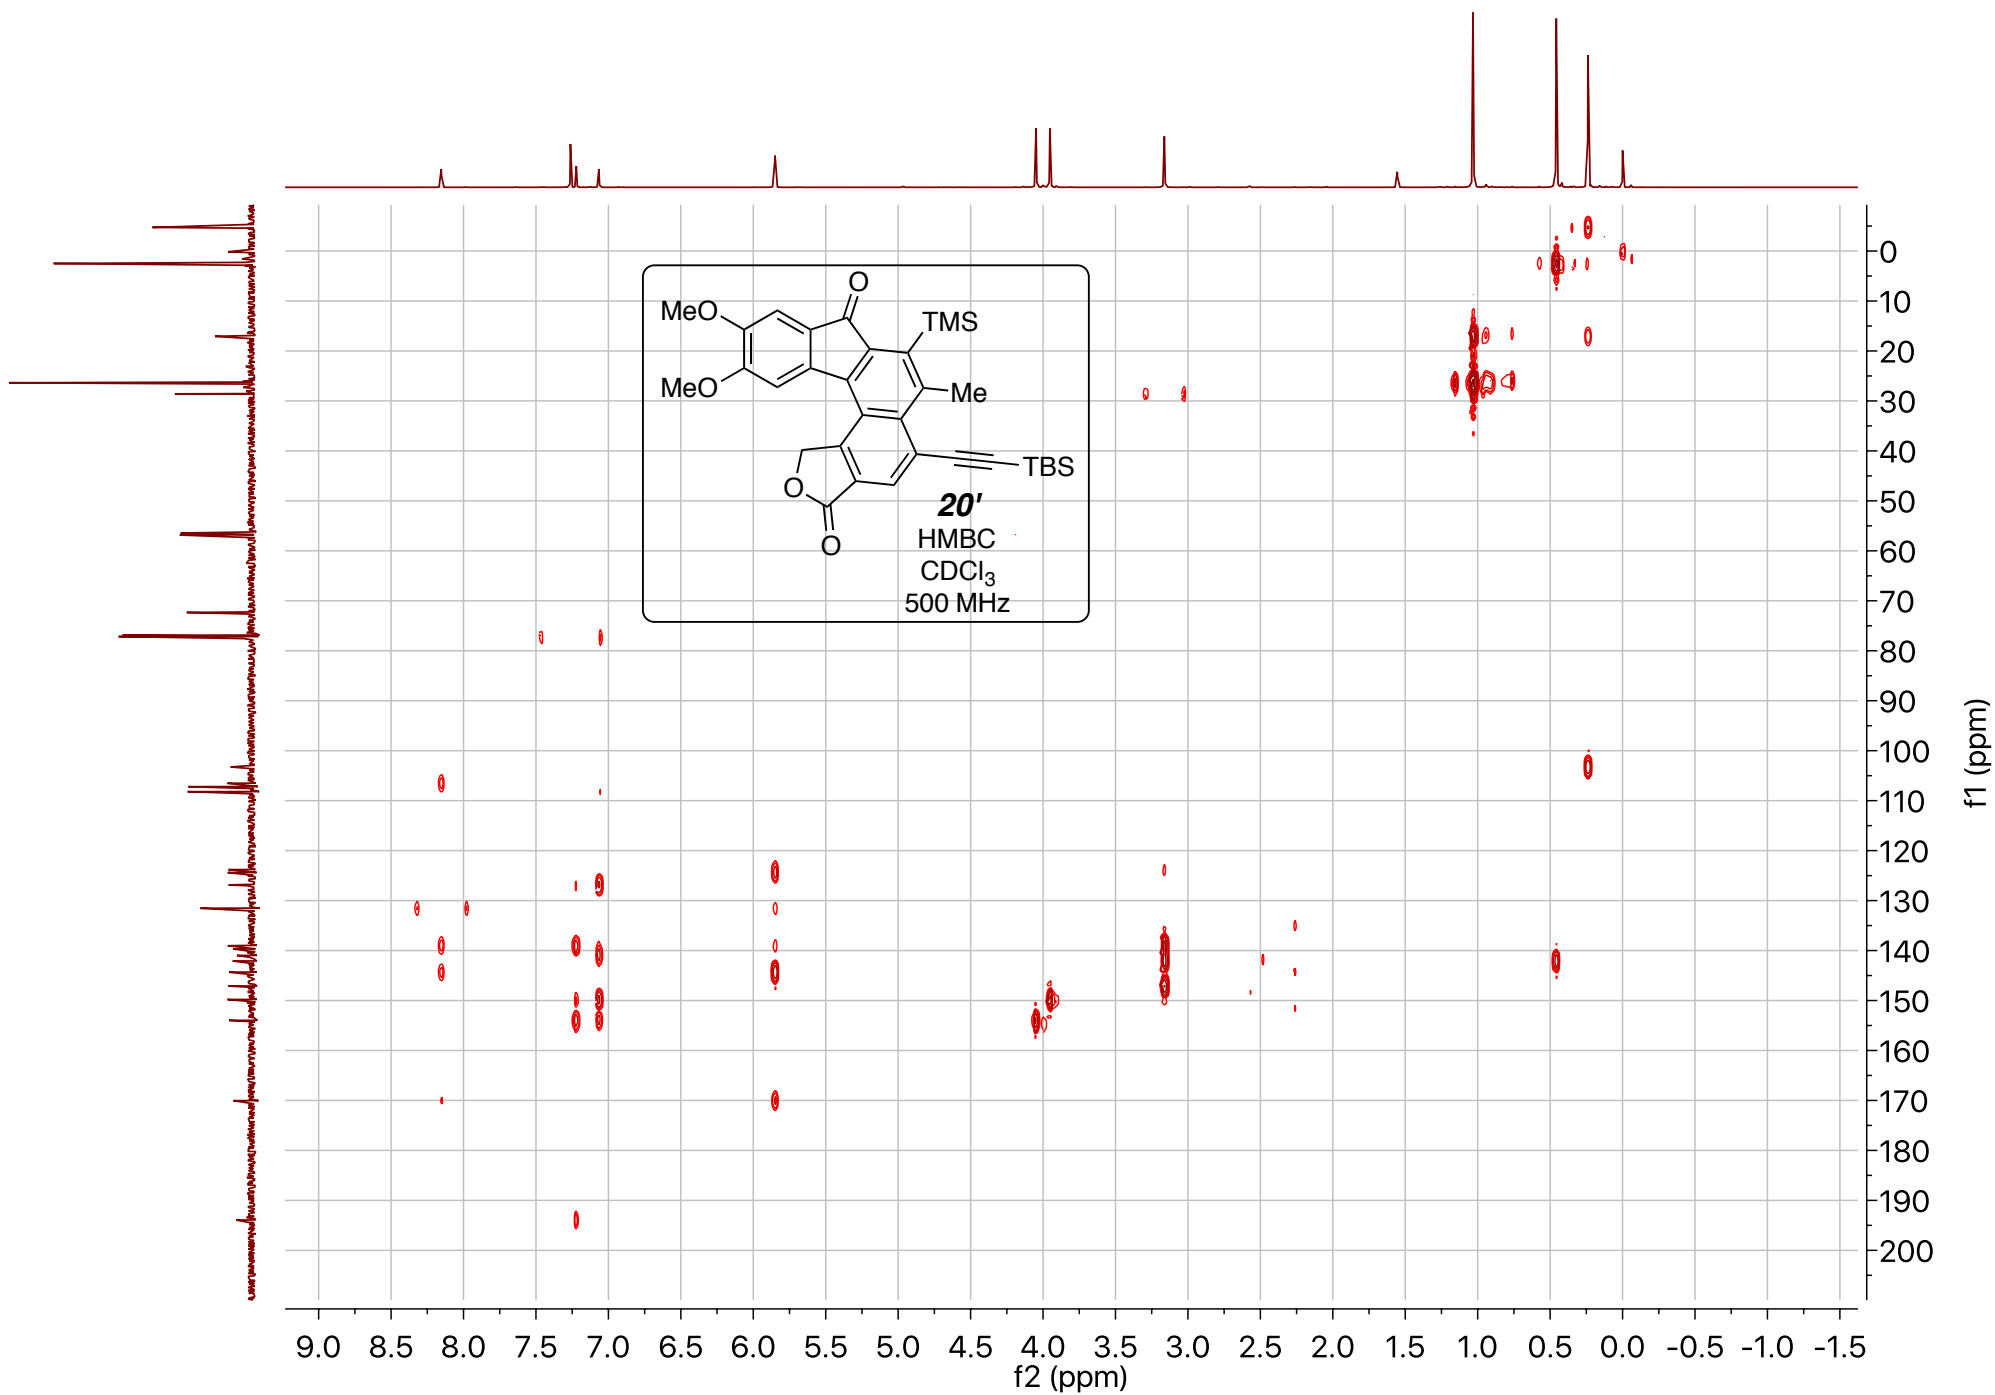

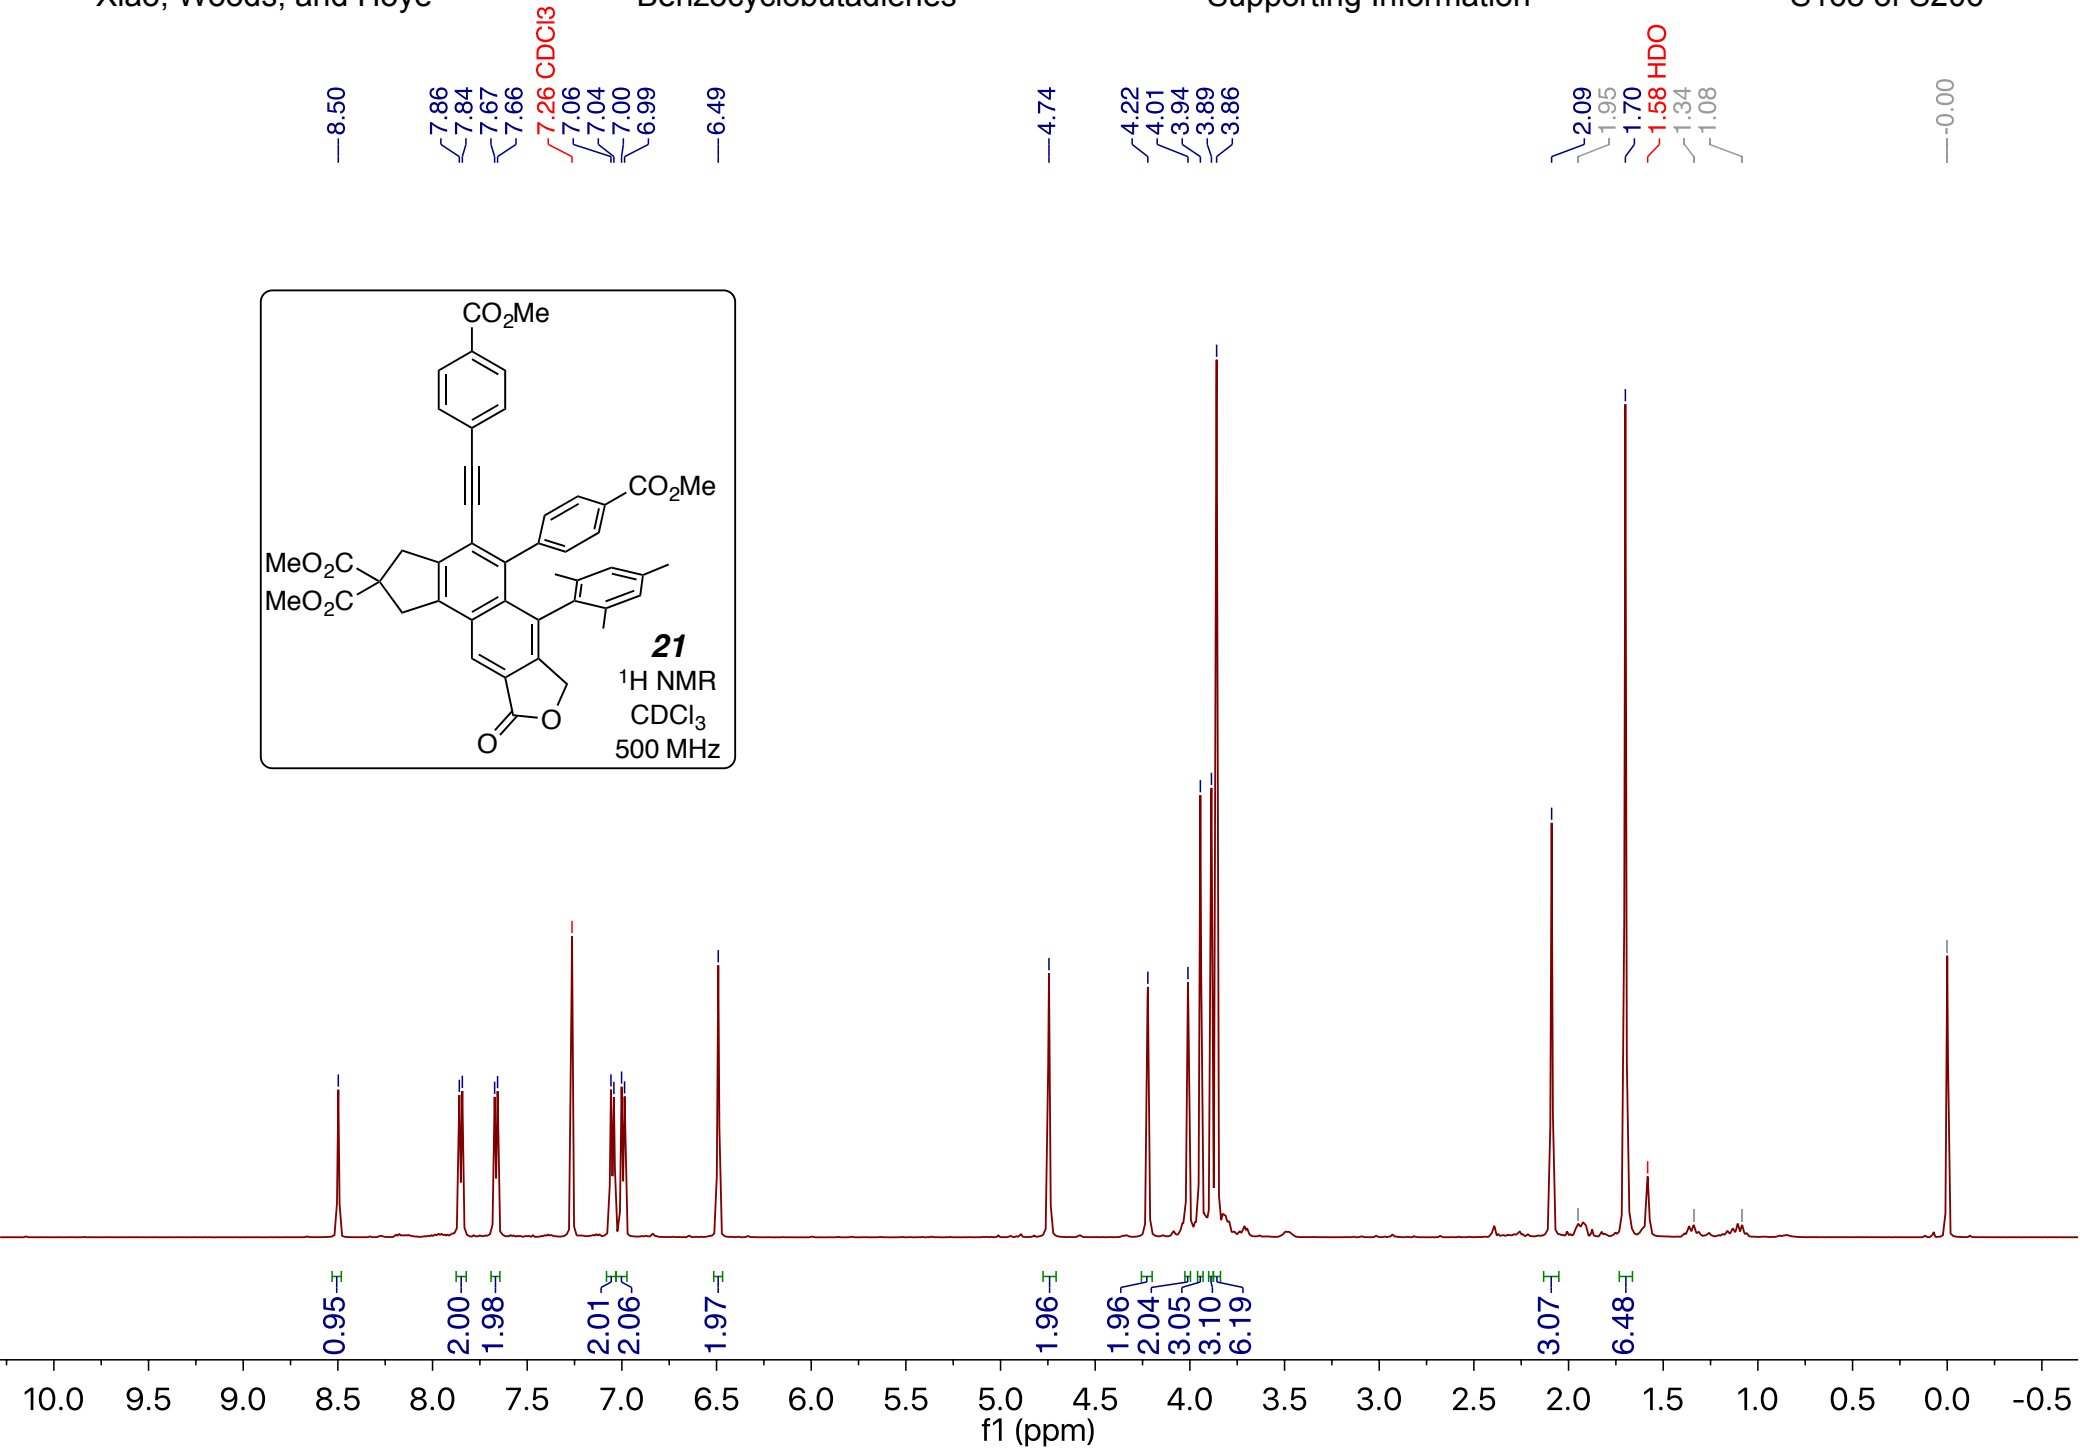

172.0  
171.1  
167.1  
166.5  
144.5  
142.4  
141.2  
138.6  
138.6  
138.1  
134.9  
134.6  
133.6  
132.5  
131.5  
131.3  
129.9  
129.5  
129.0  
128.6  
128.4  
128.1  
127.1  
124.0  
122.9  
122.6  
99.2

89.6

77.4 CDCl<sub>3</sub>  
77.2 CDCl<sub>3</sub>  
76.9 CDCl<sub>3</sub>

70.1

59.0

53.5

52.4

52.2

42.1

41.0

34.1 impurity

25.8 impurity

25.1 impurity

20.8

20.6

0.1

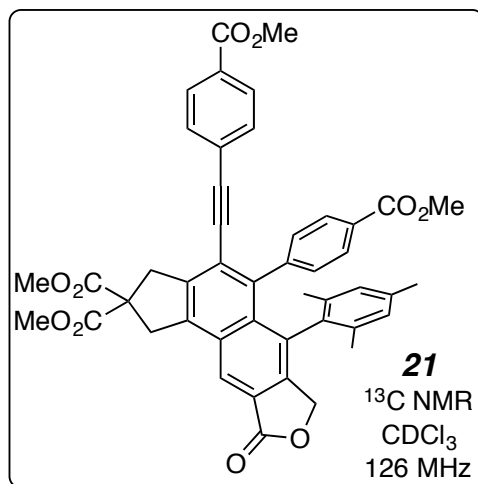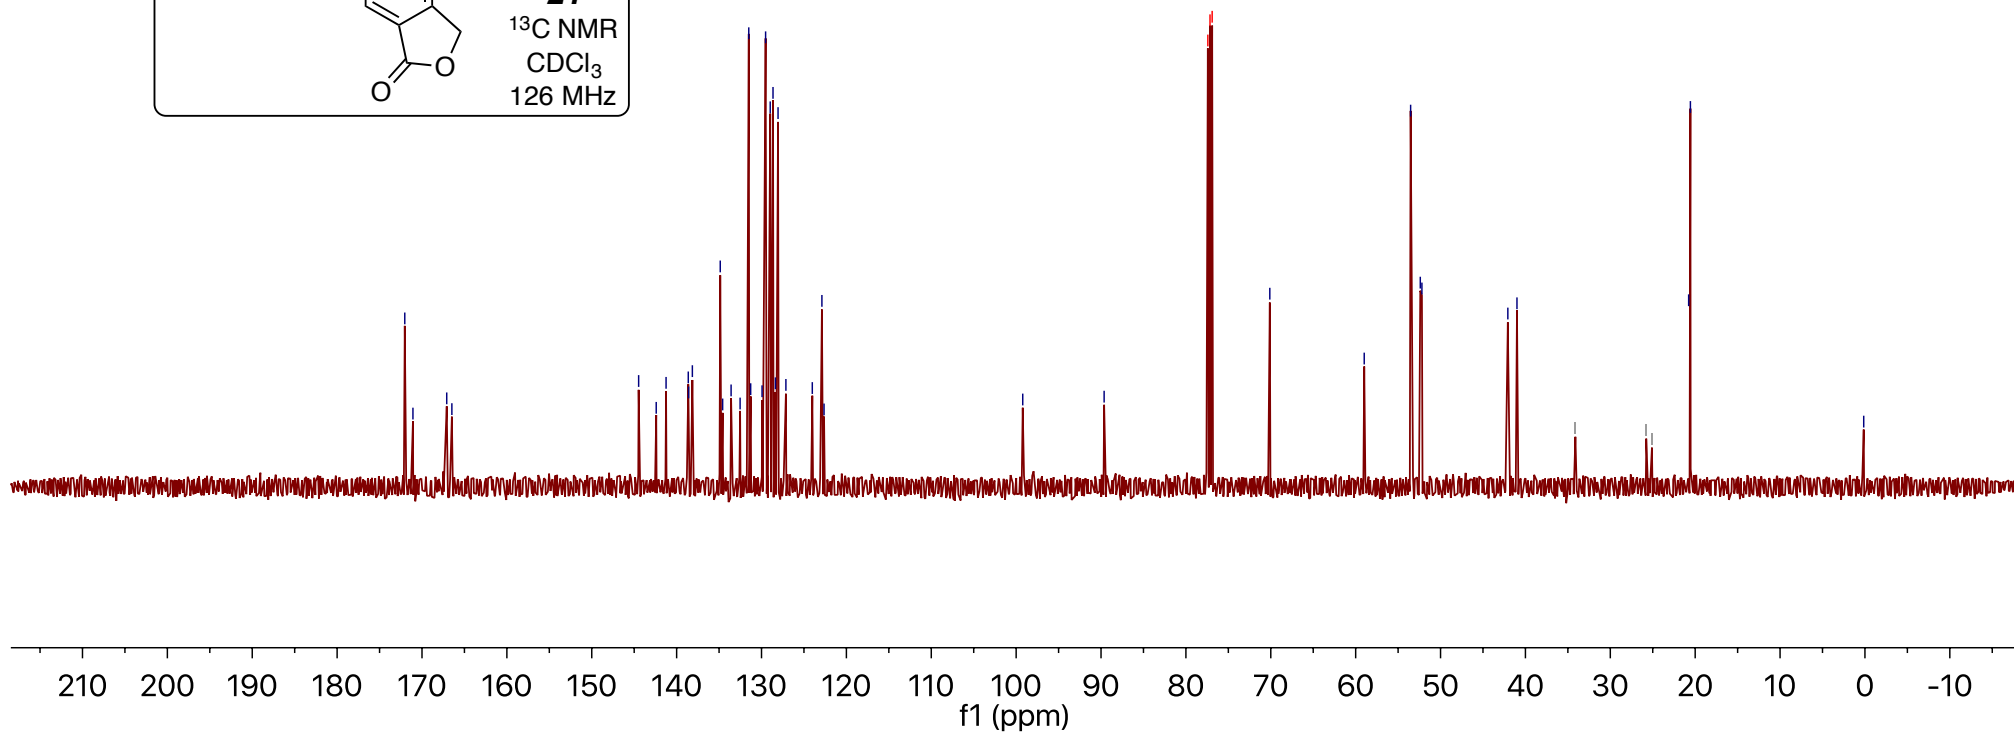

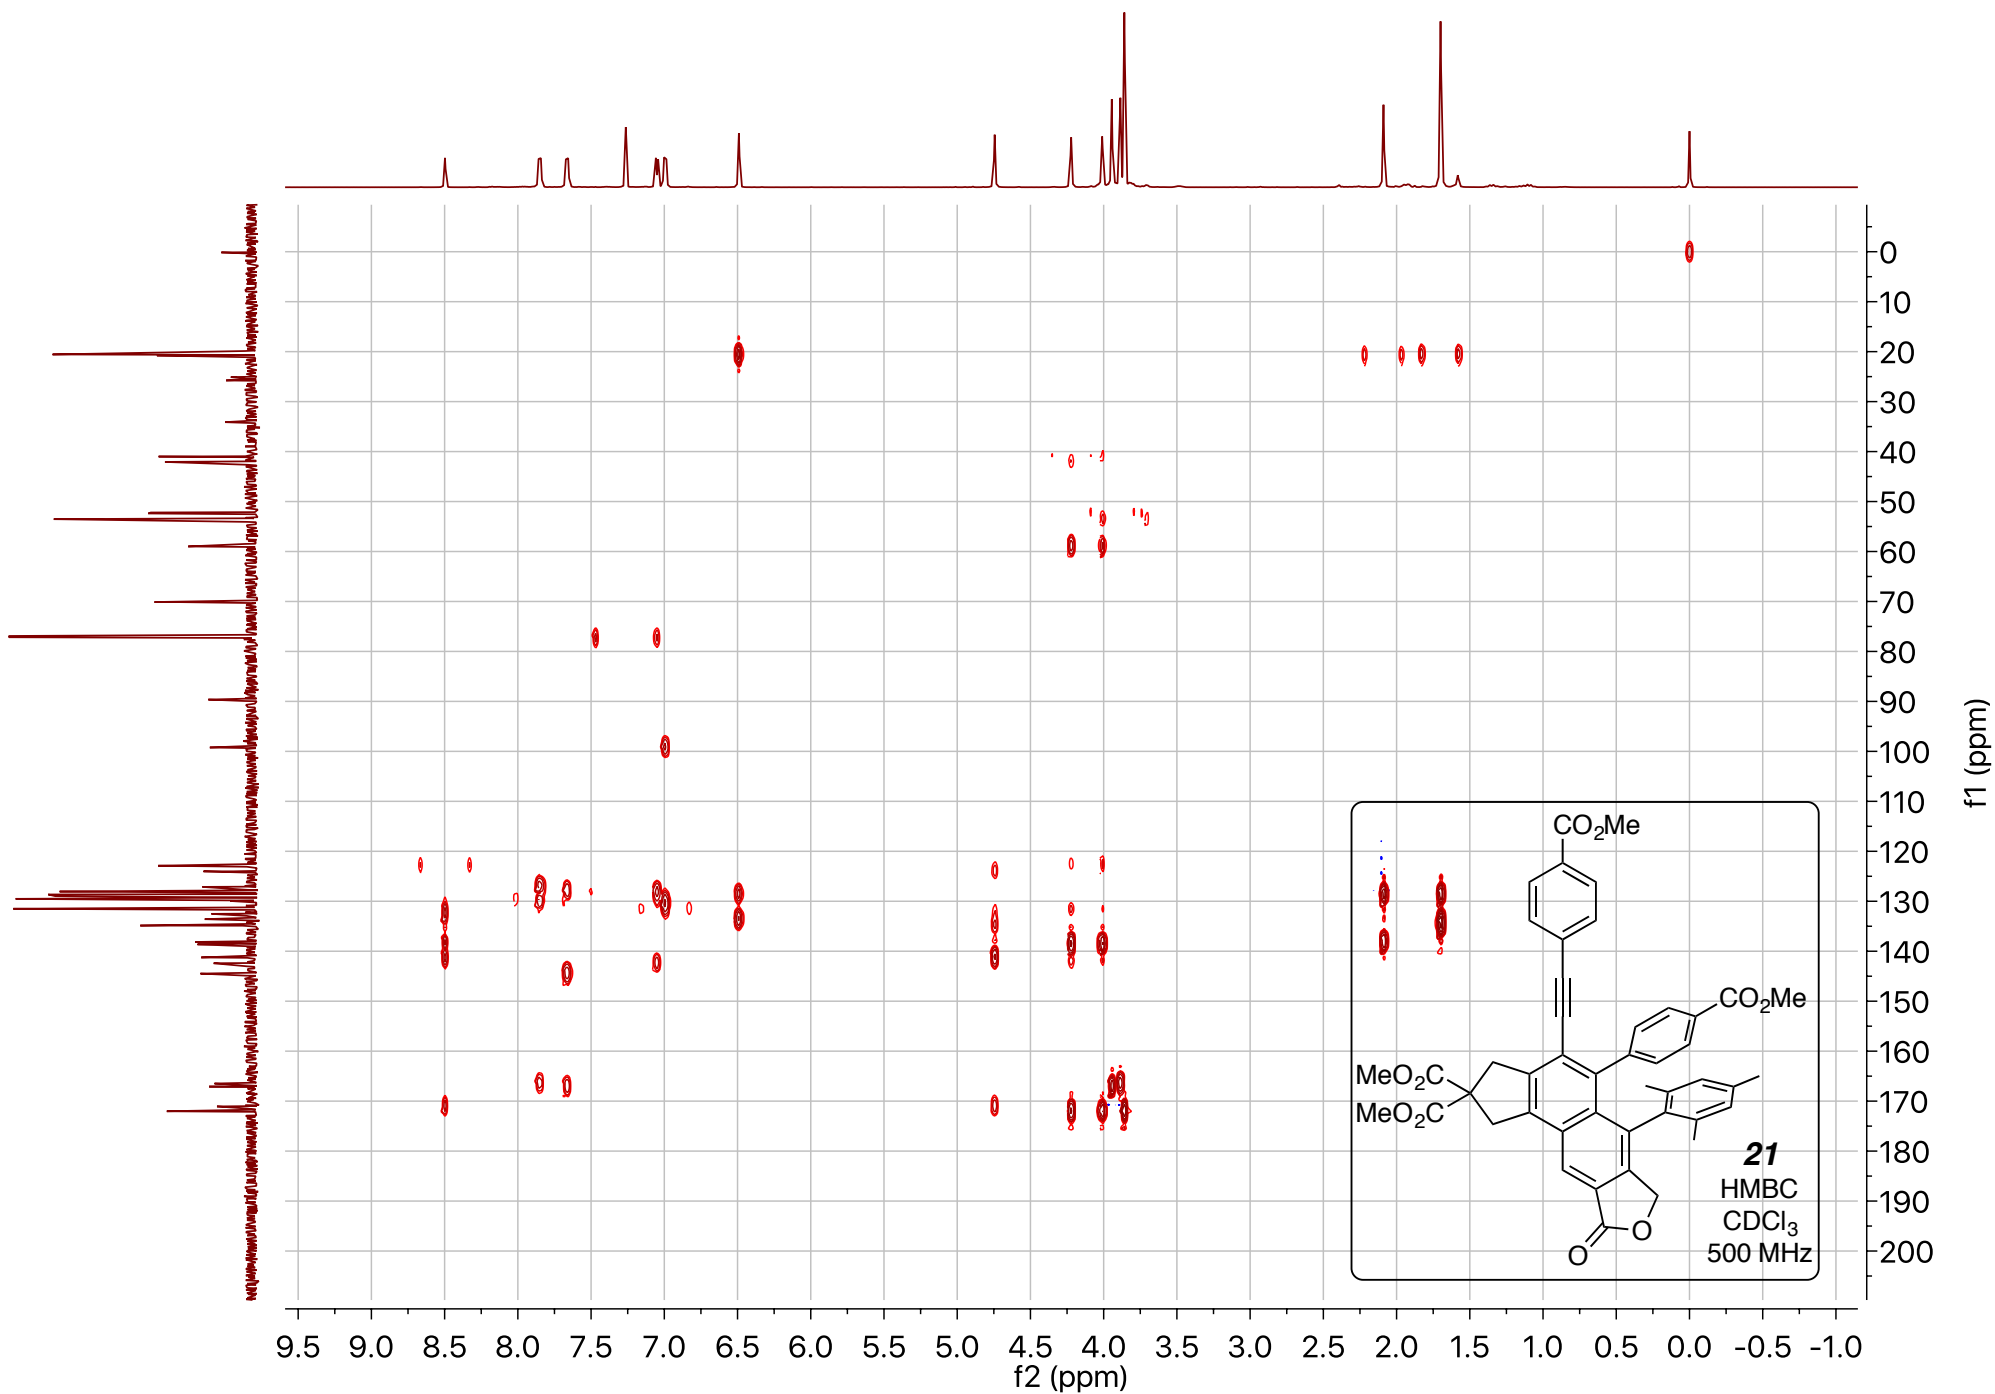

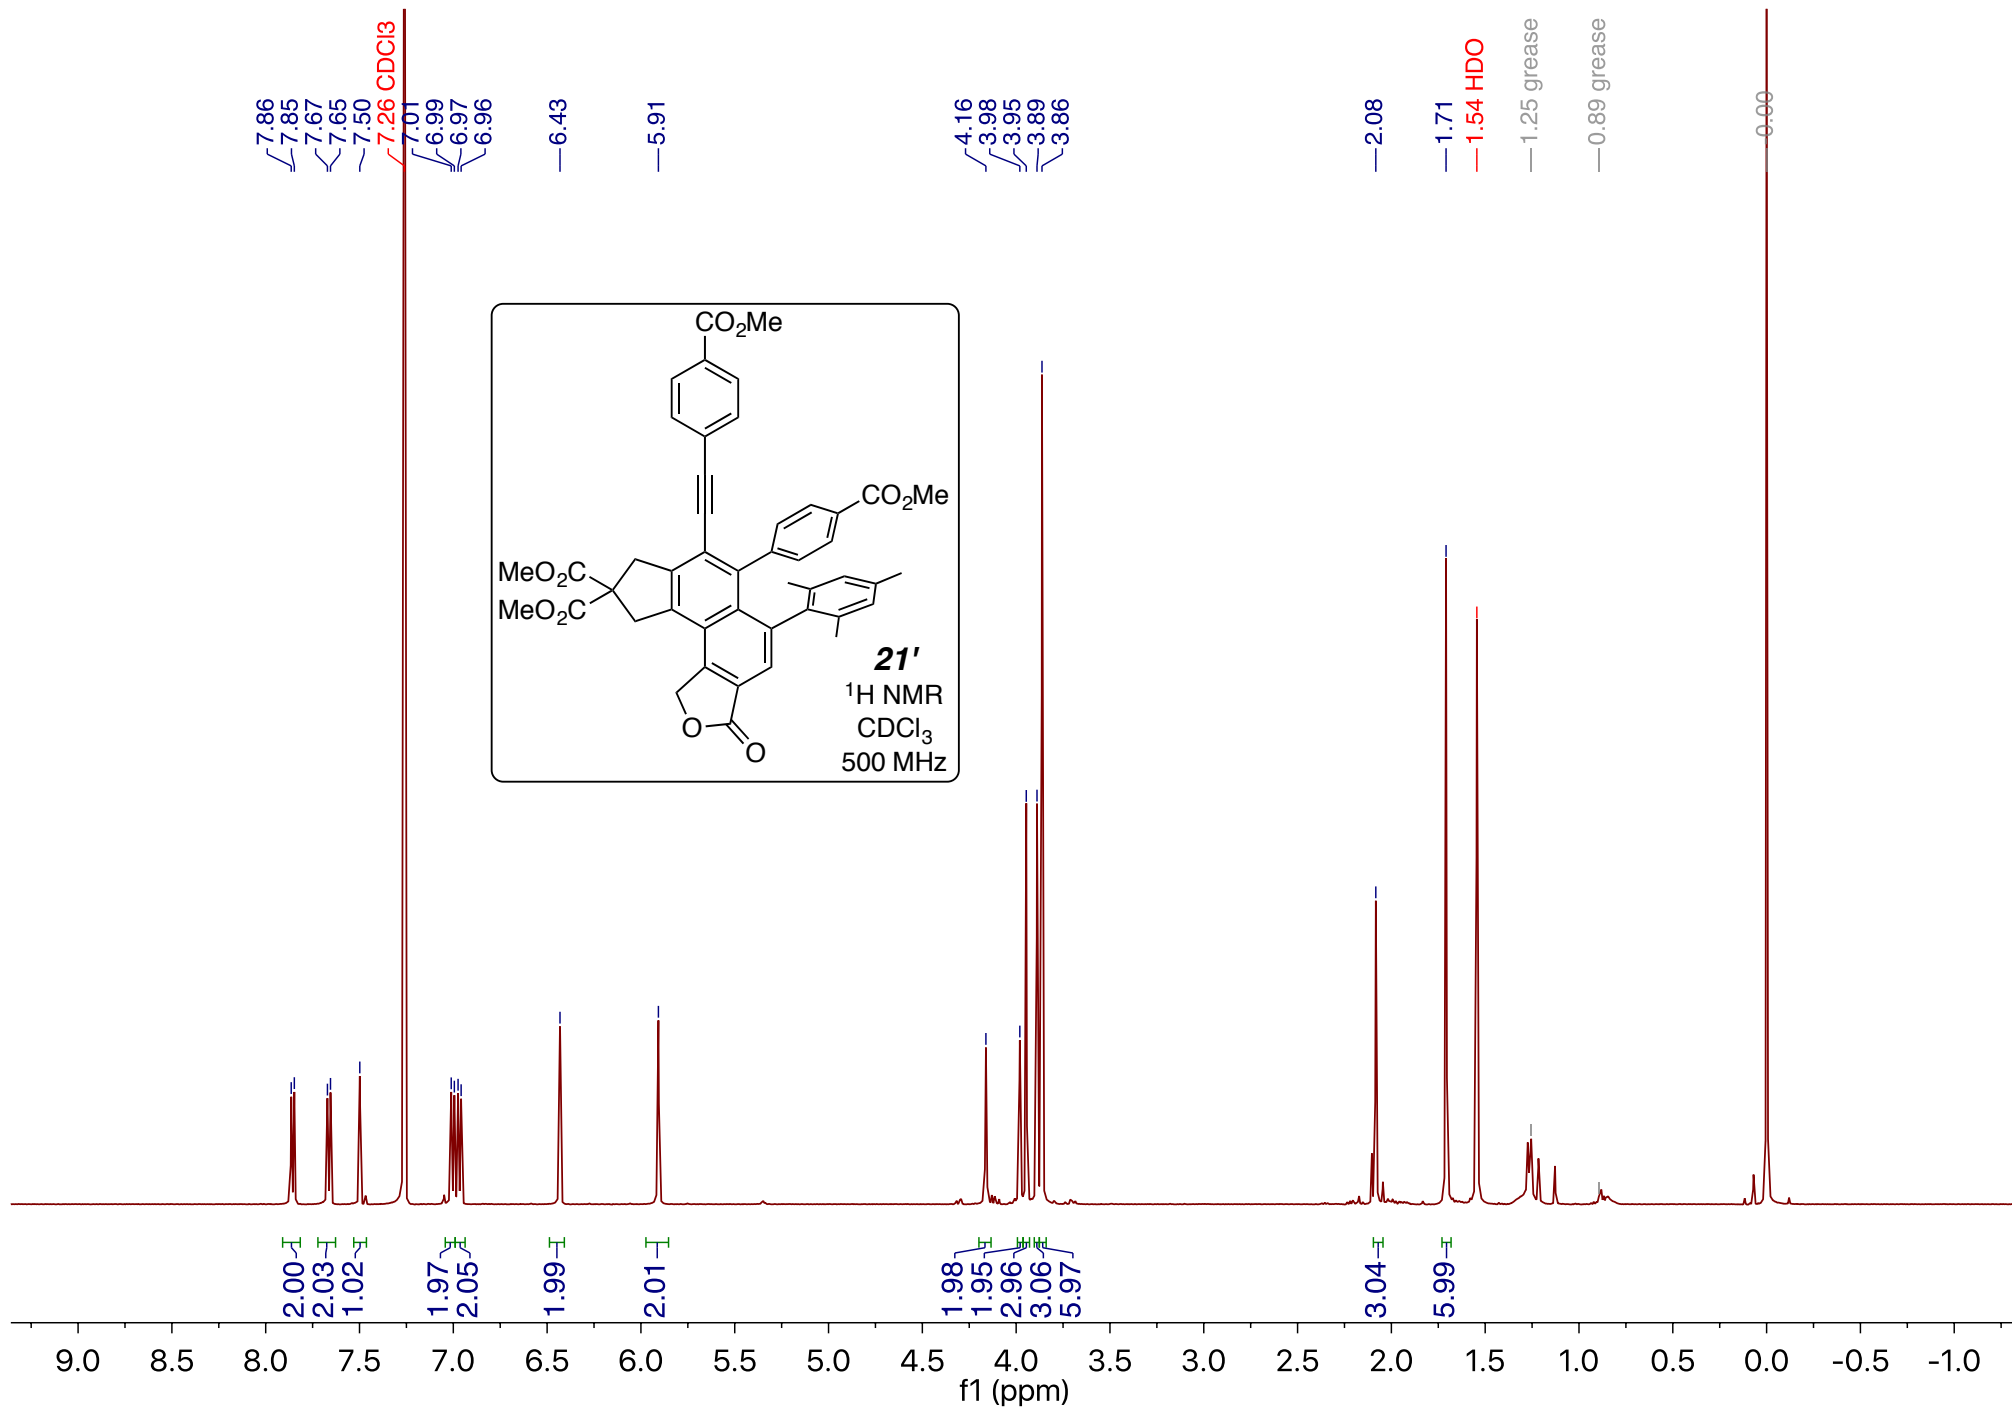

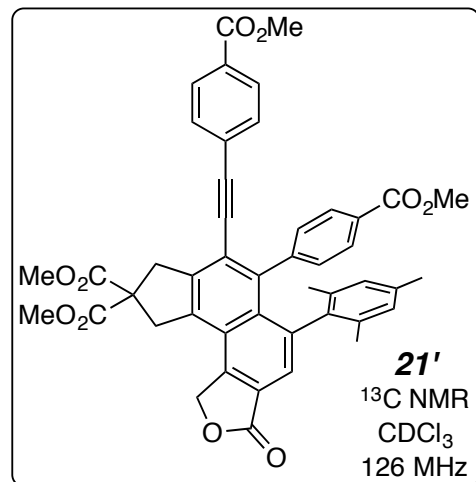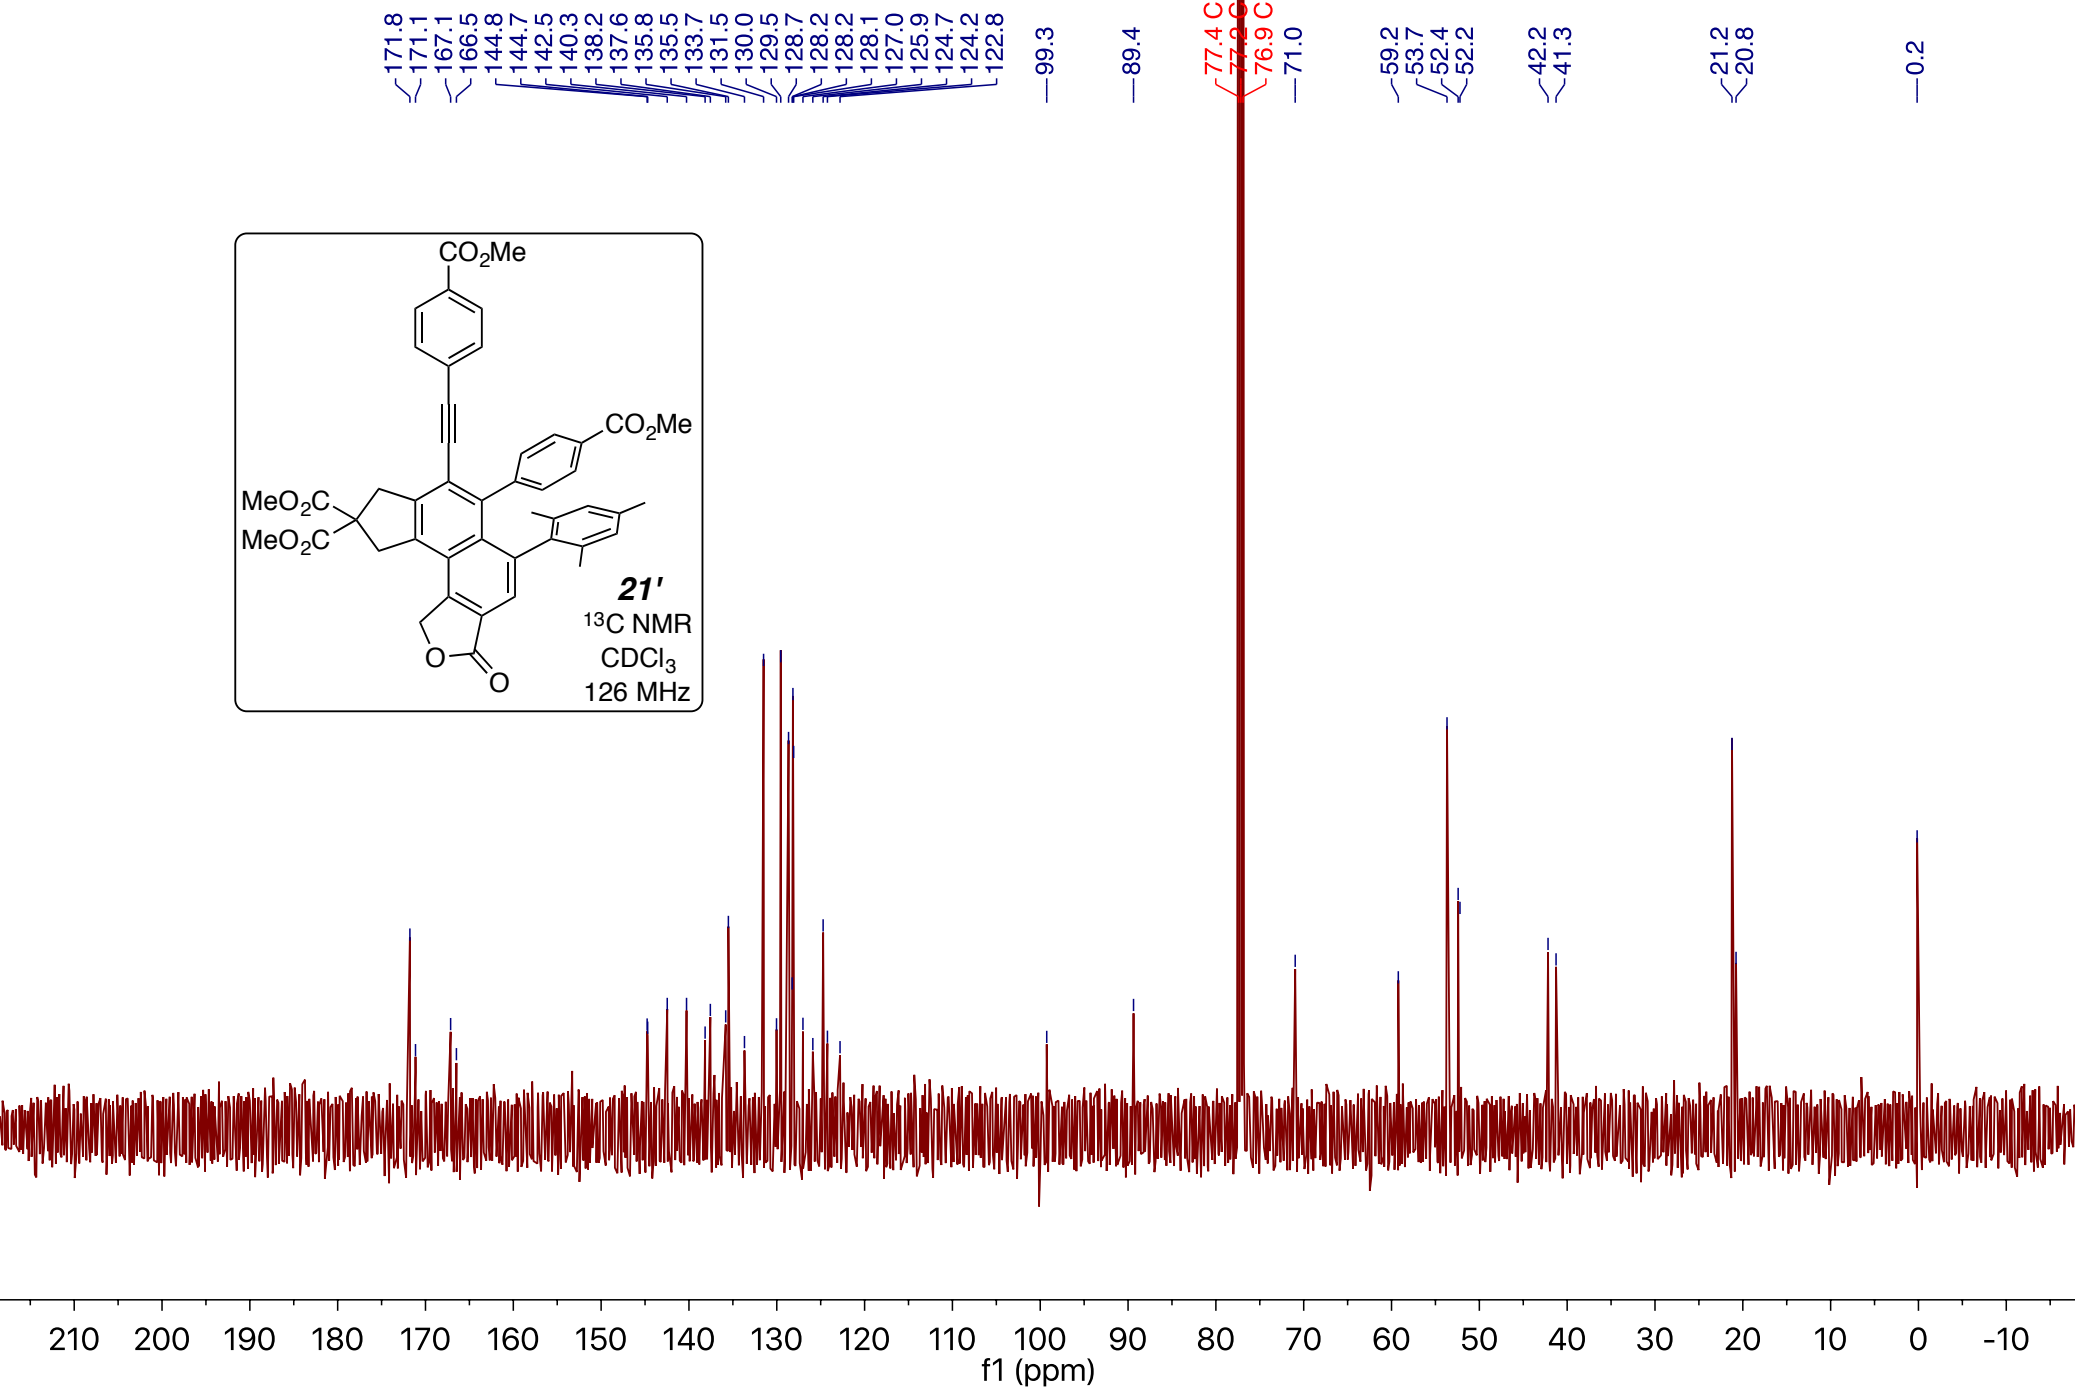



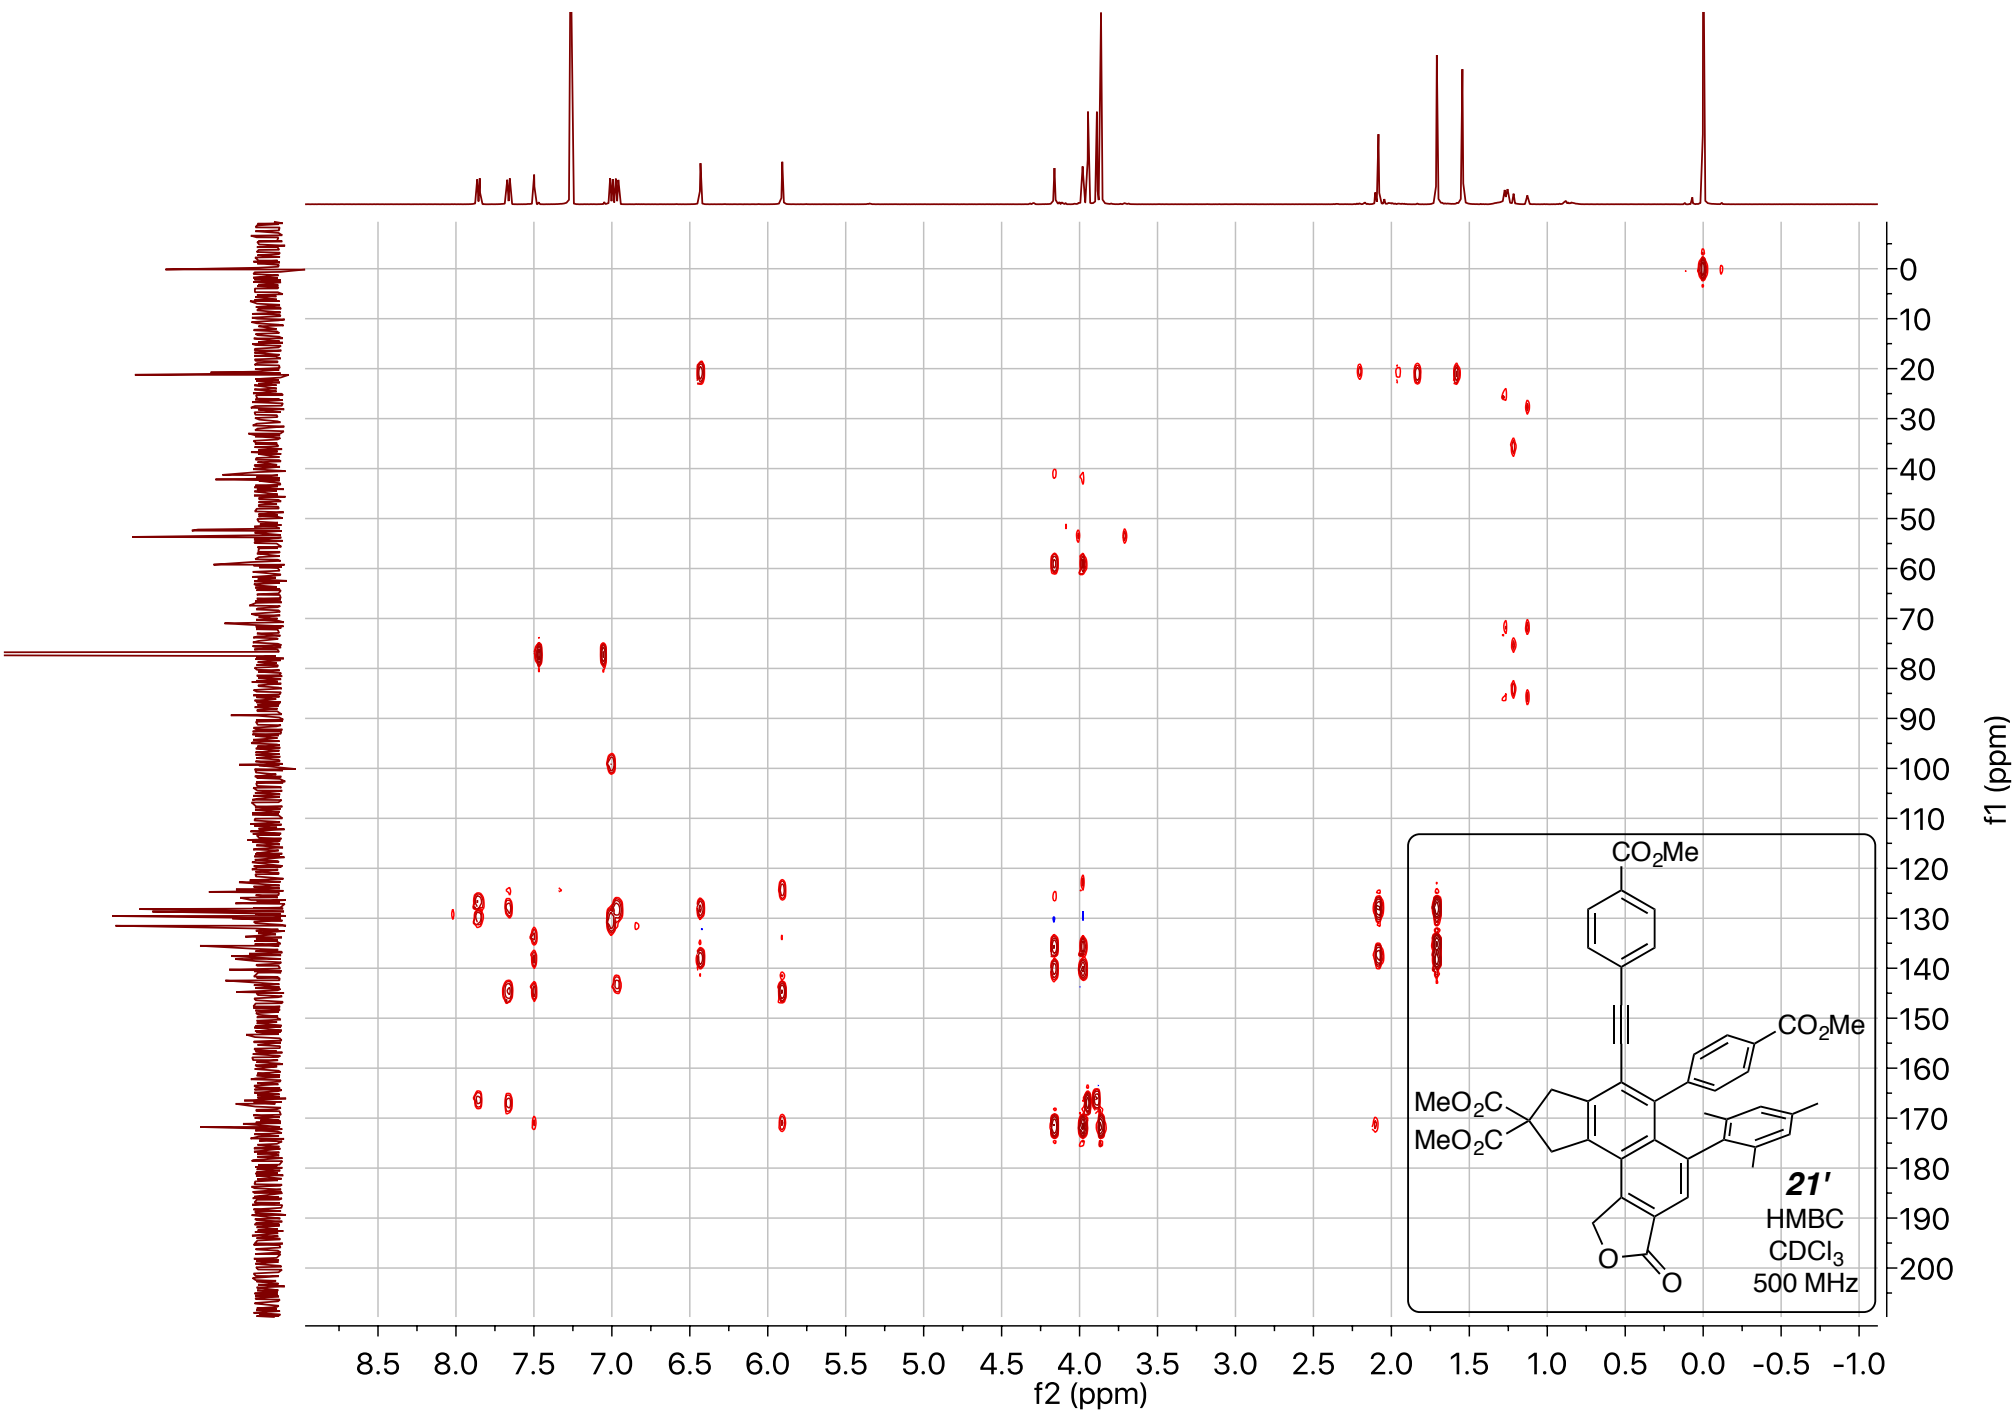

7.48  
7.46  
7.45  
7.40  
7.39  
7.37  
7.36  
7.34  
7.26 CDCl<sub>3</sub>  
7.24  
7.14  
7.13

4.01  
3.93  
3.90  
3.85  
3.77

2.43

1.59  
1.55 H<sub>2</sub>O

-0.00

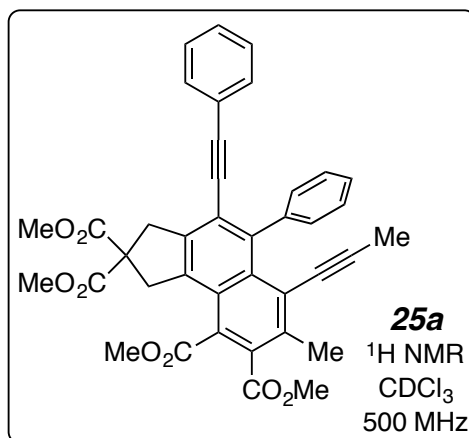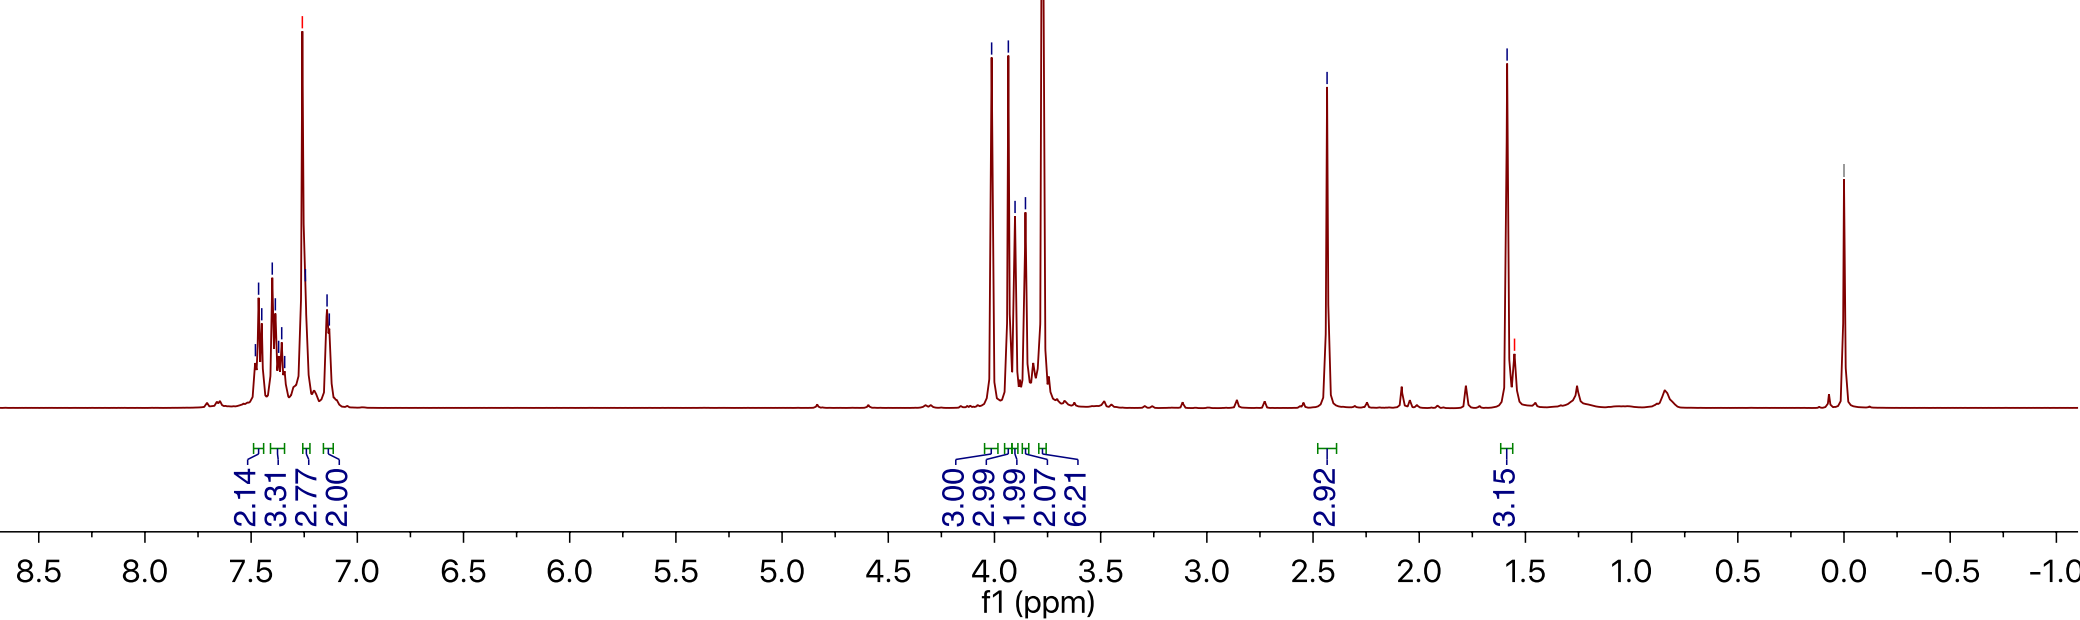

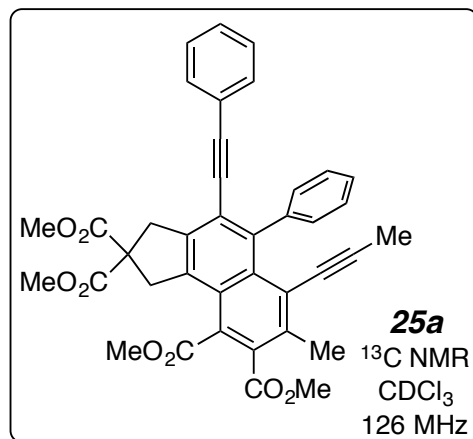

171.9  
169.7  
168.9

143.0  
141.8  
140.4  
136.8  
134.1  
132.3  
132.1  
131.7  
131.1  
128.6  
128.3  
127.6  
127.5  
127.4  
125.2  
124.9  
123.2  
122.1  
105.3

98.9

87.5

78.4  
77.4  
77.2  
76.9

59.6  
53.3  
53.1  
52.9

41.6  
41.2

19.4

5.4

0.1

210 200 190 180 170 160 150 140 130 120 110 100 90 80 70 60 50 40 30 20 10 0 -10  
f1 (ppm)

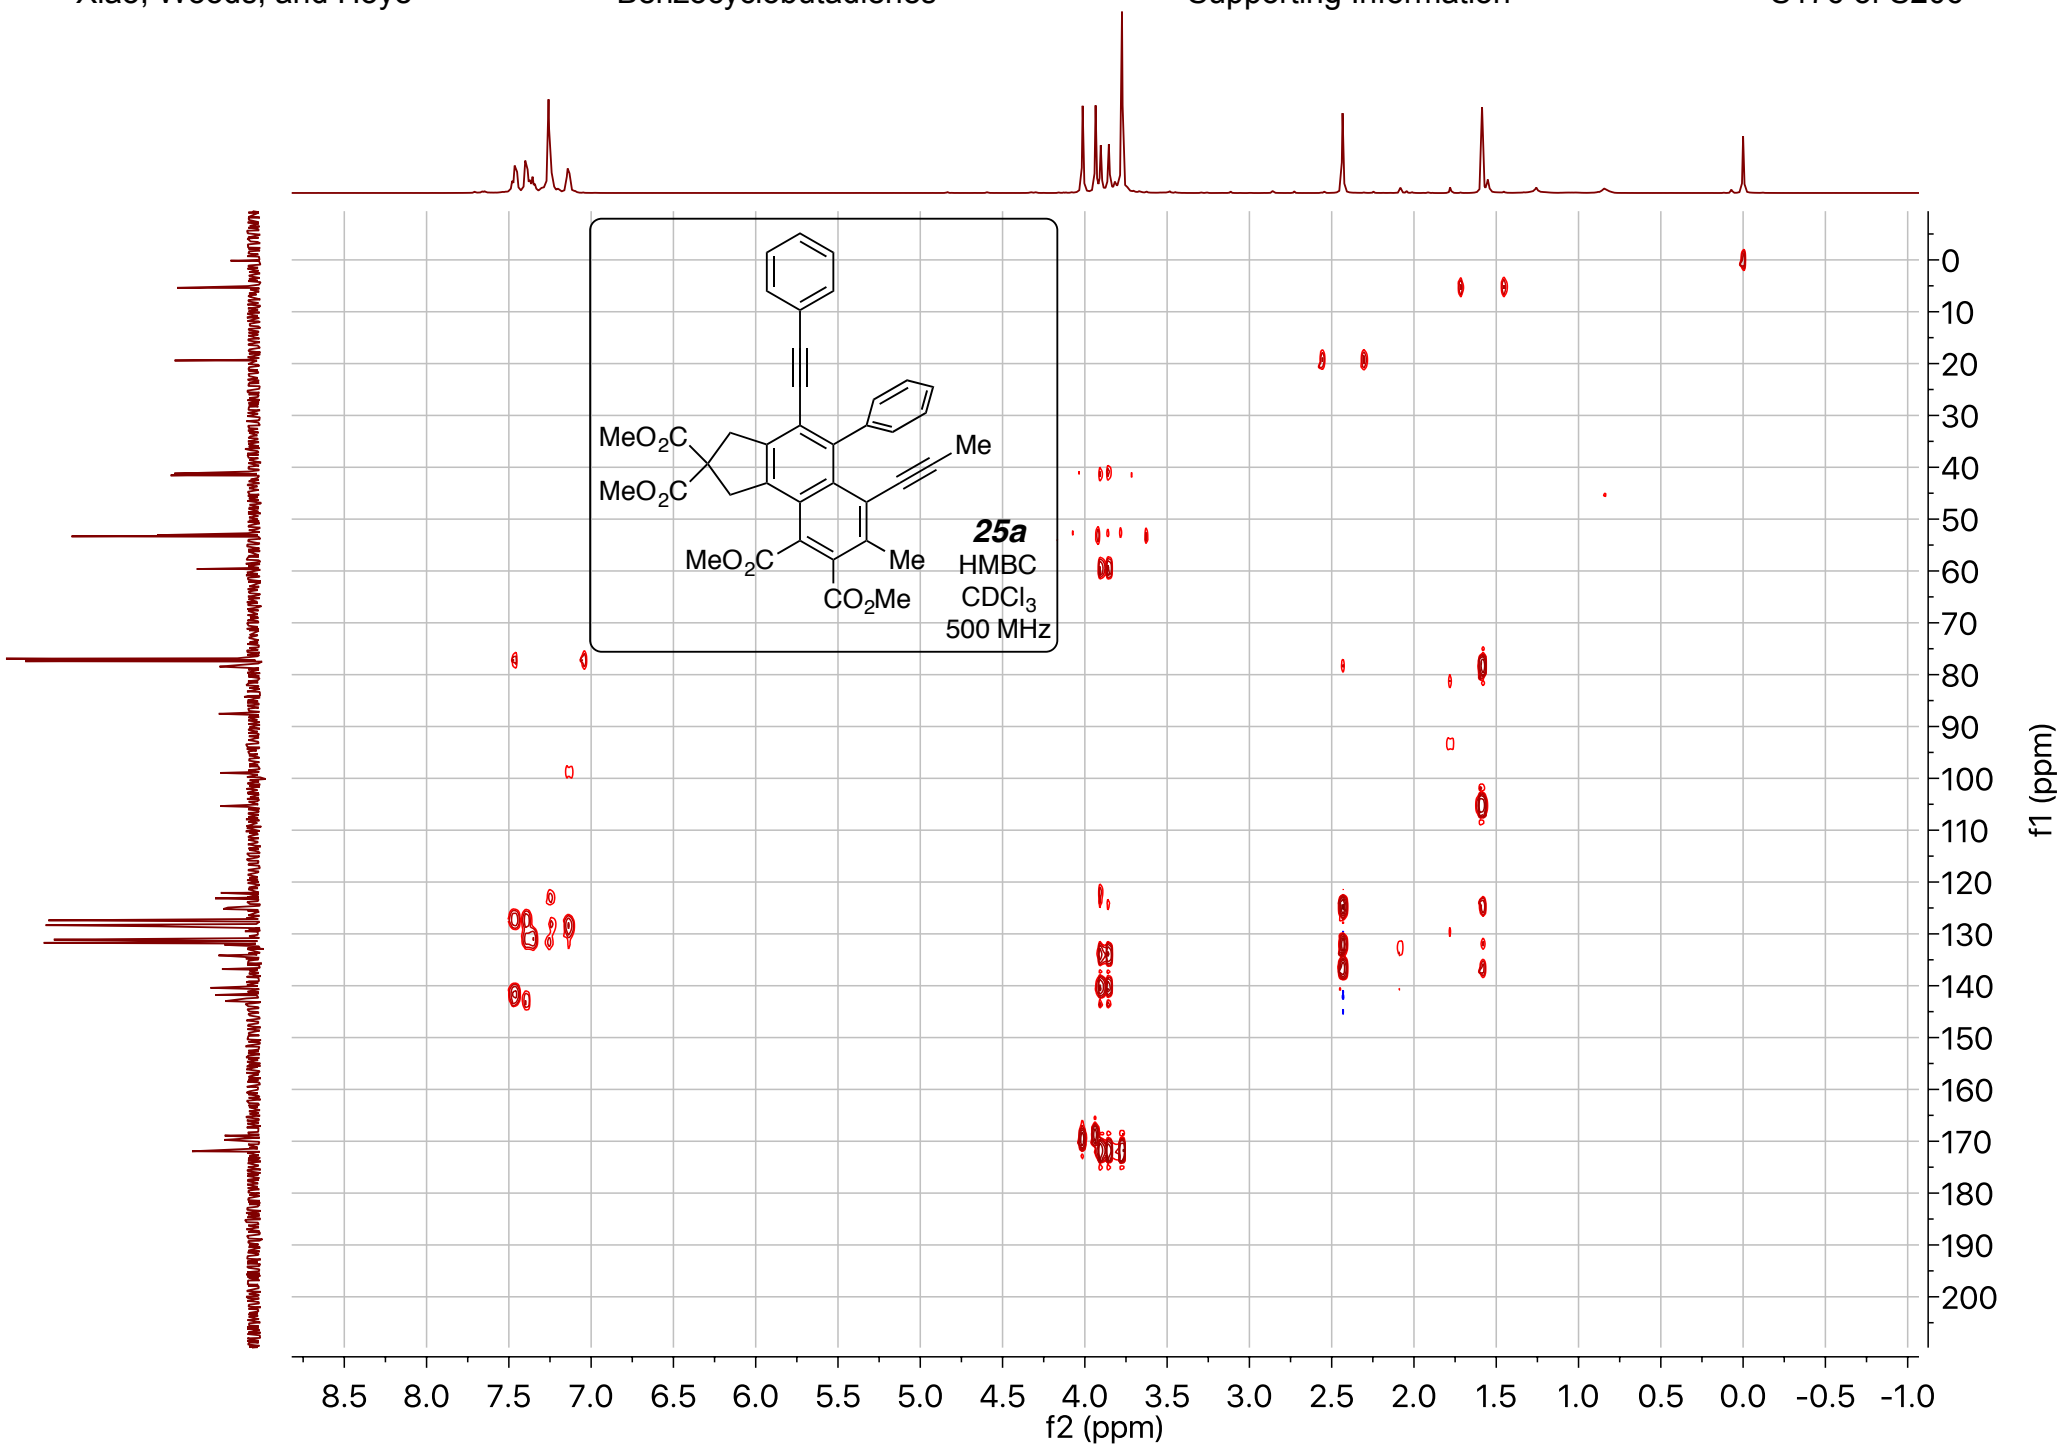

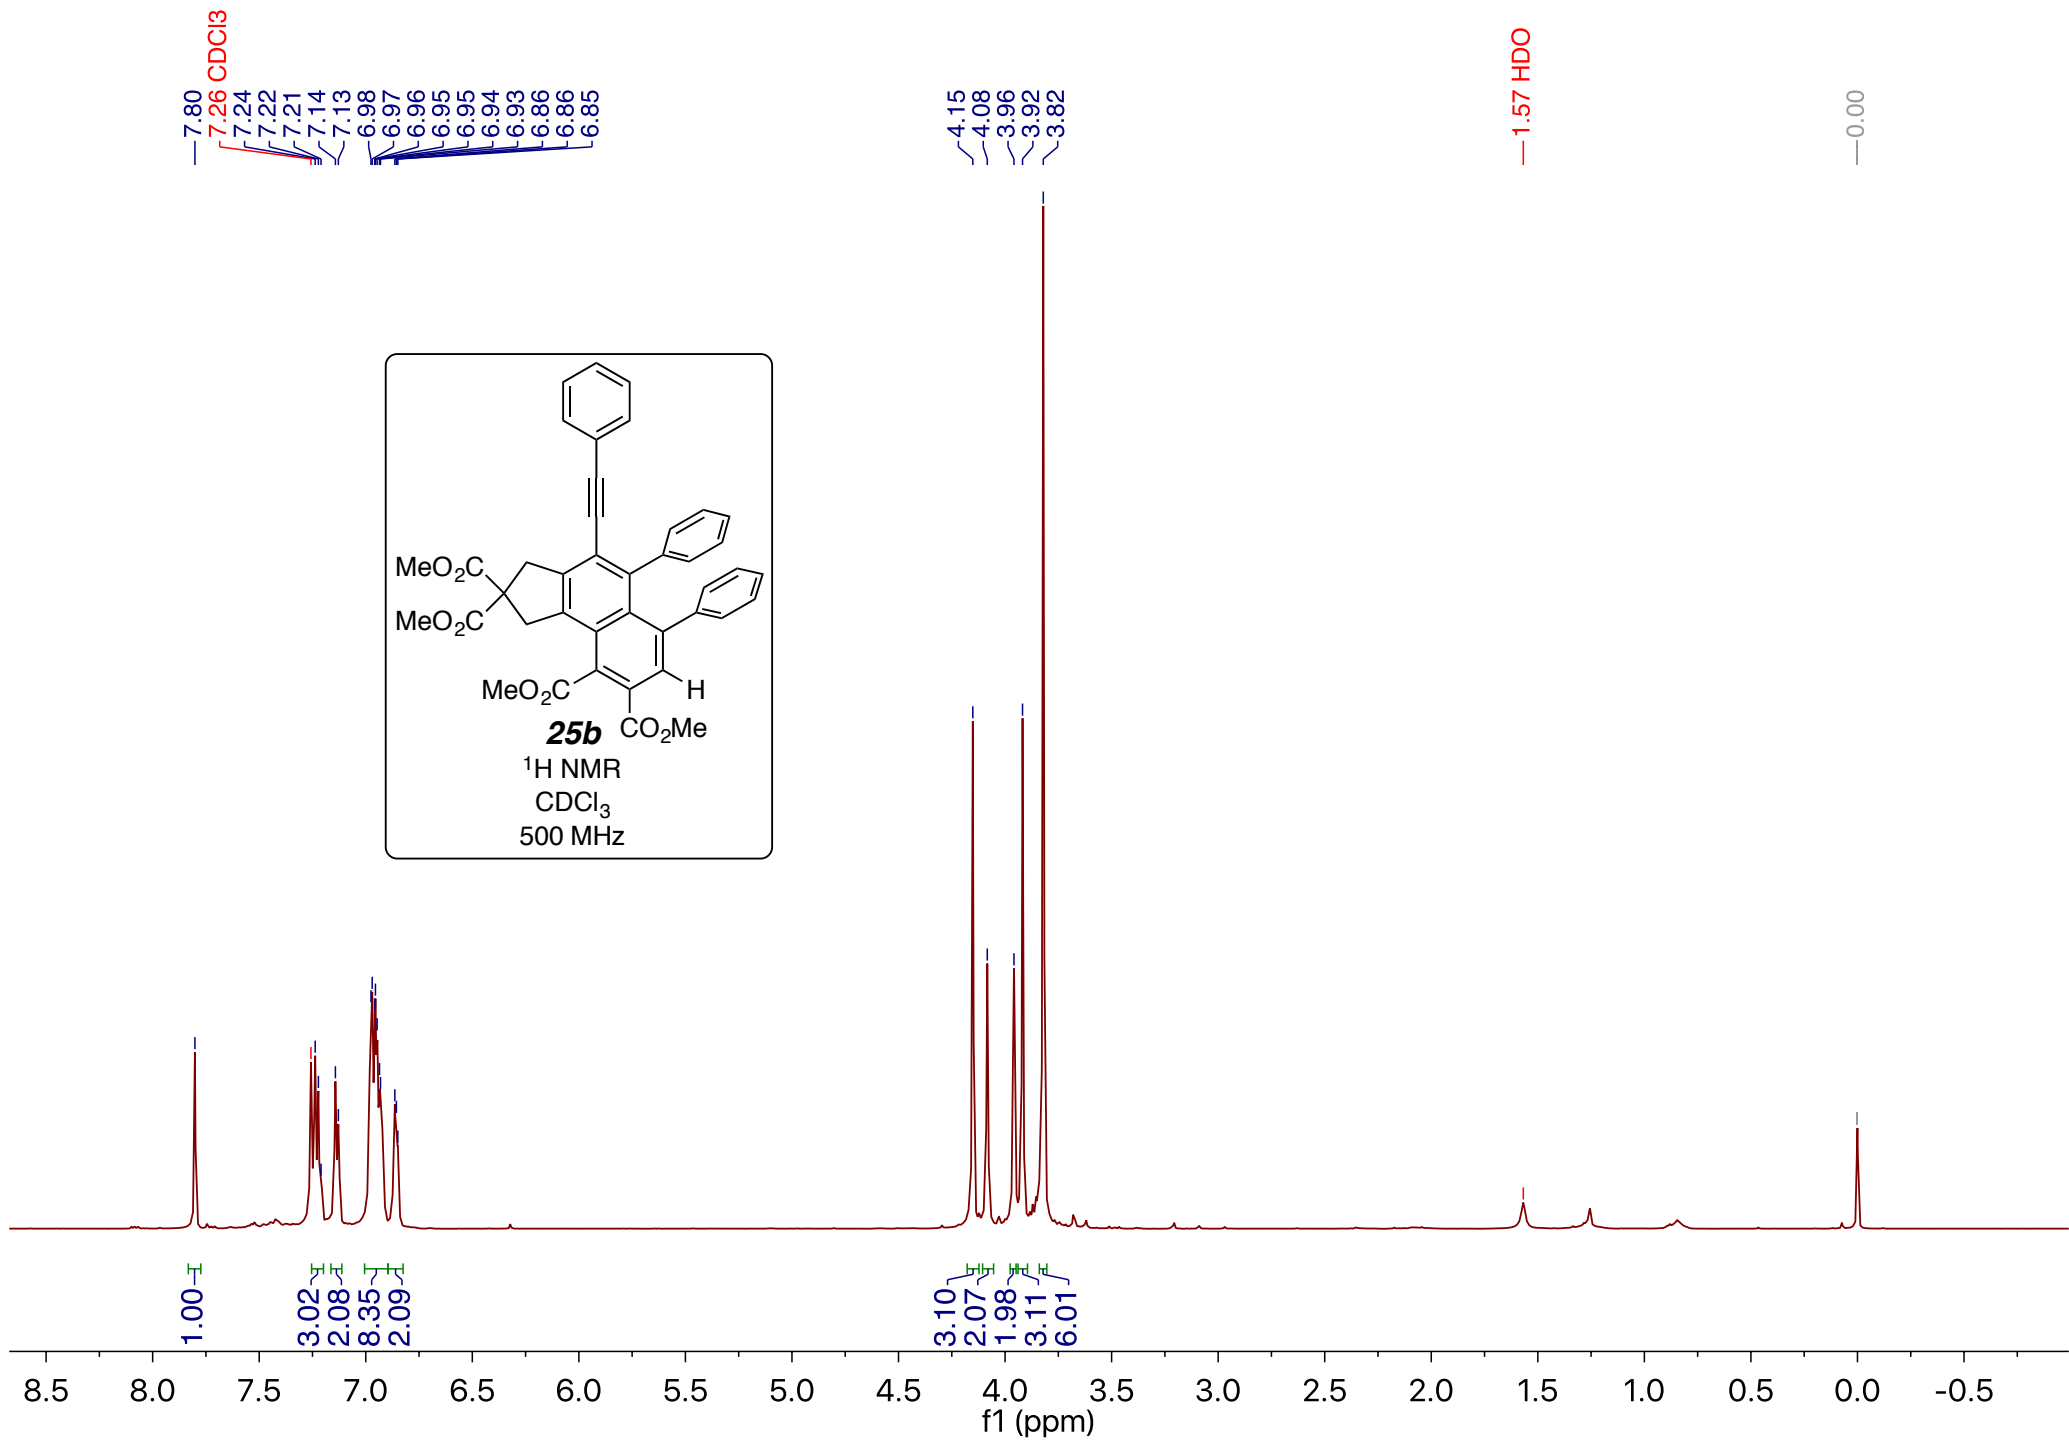

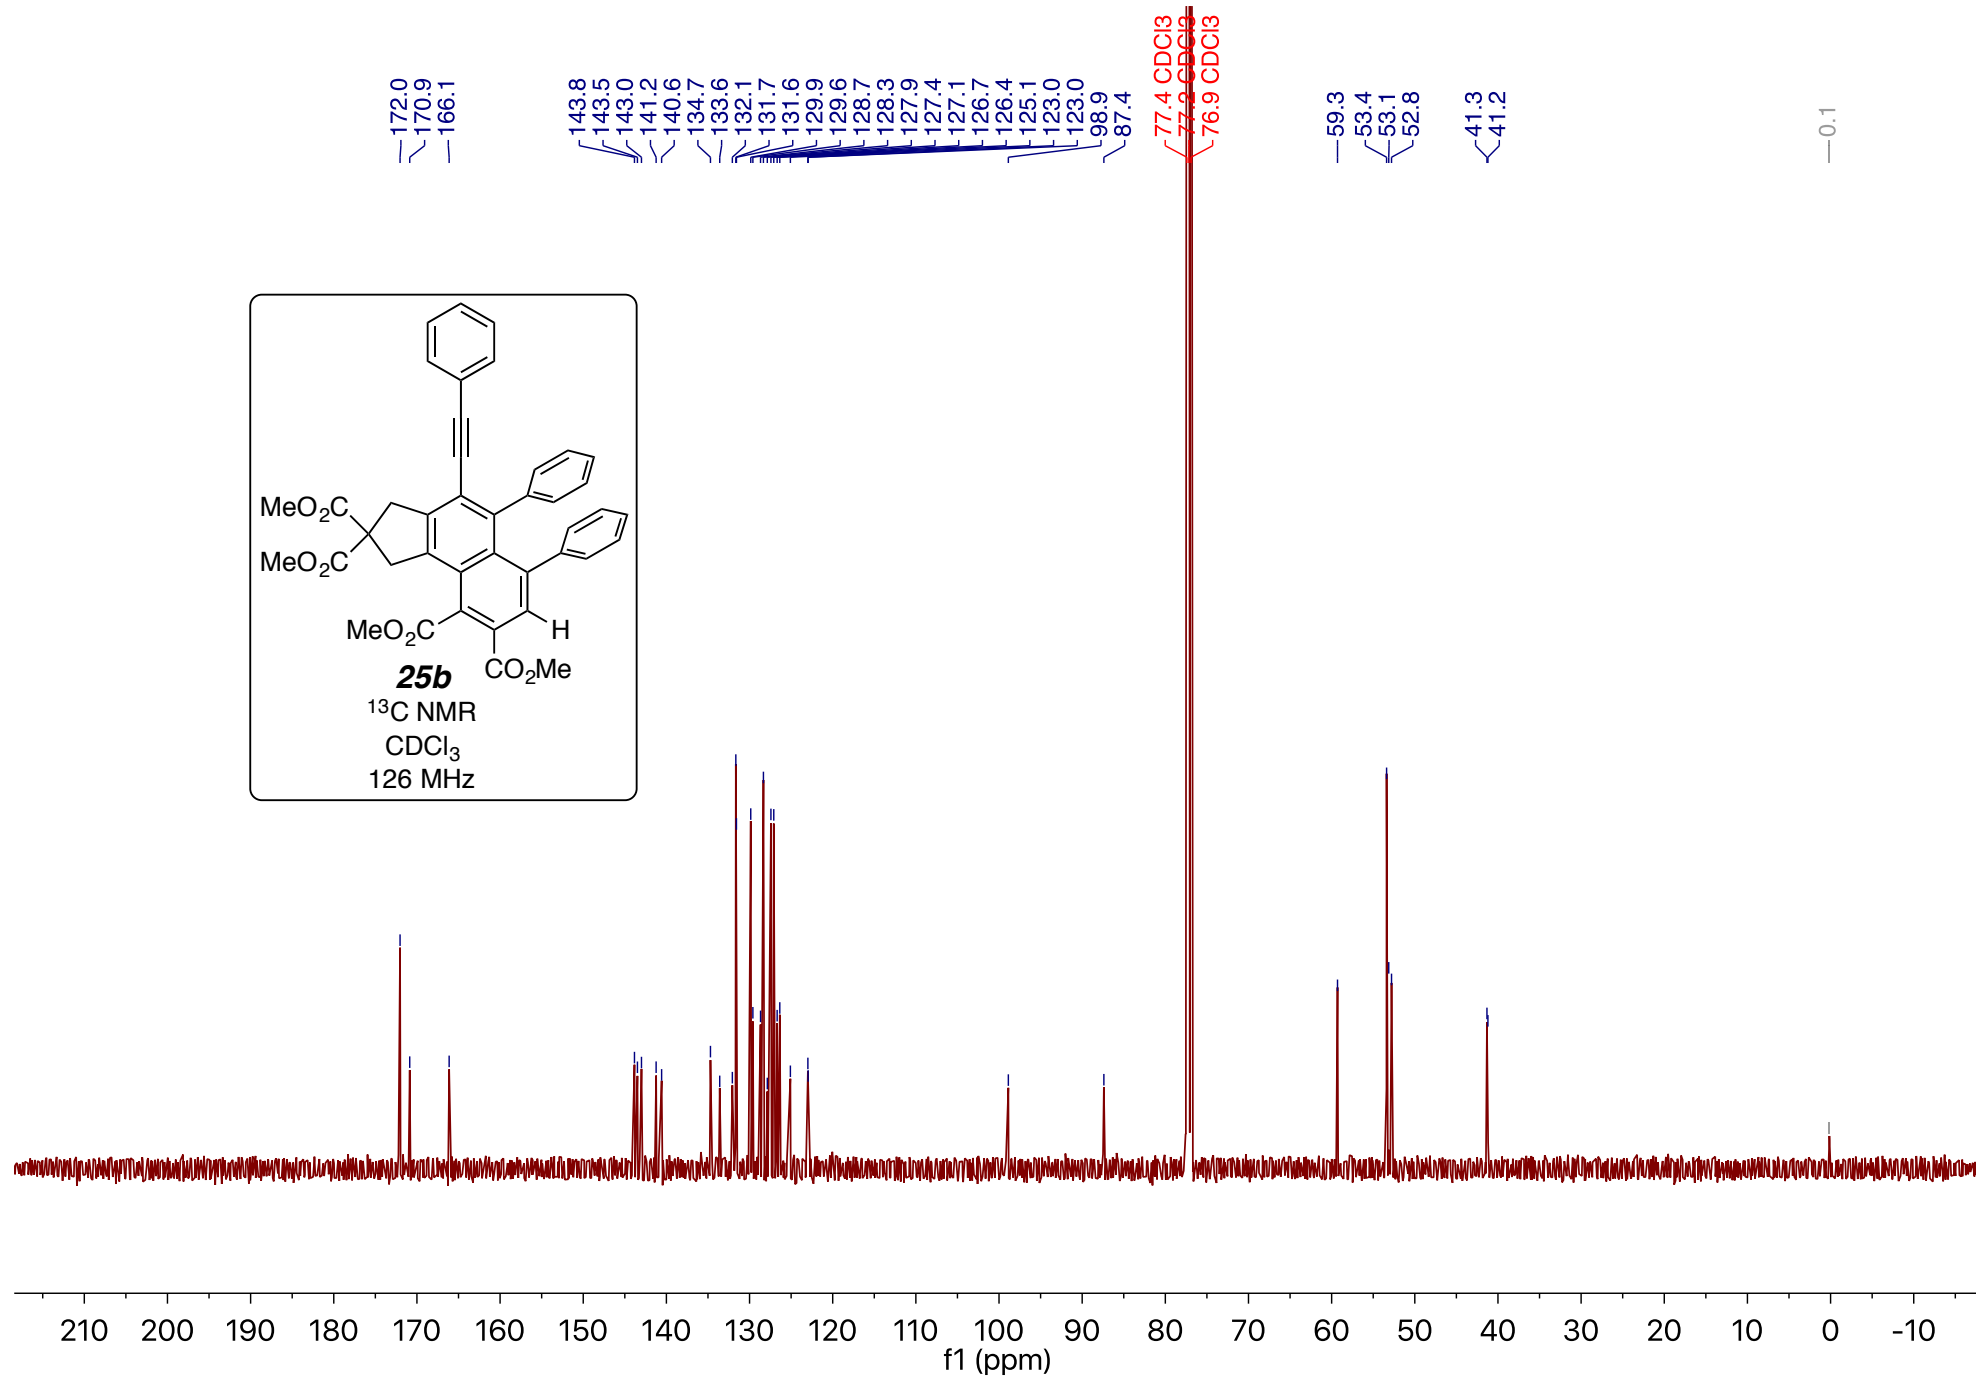

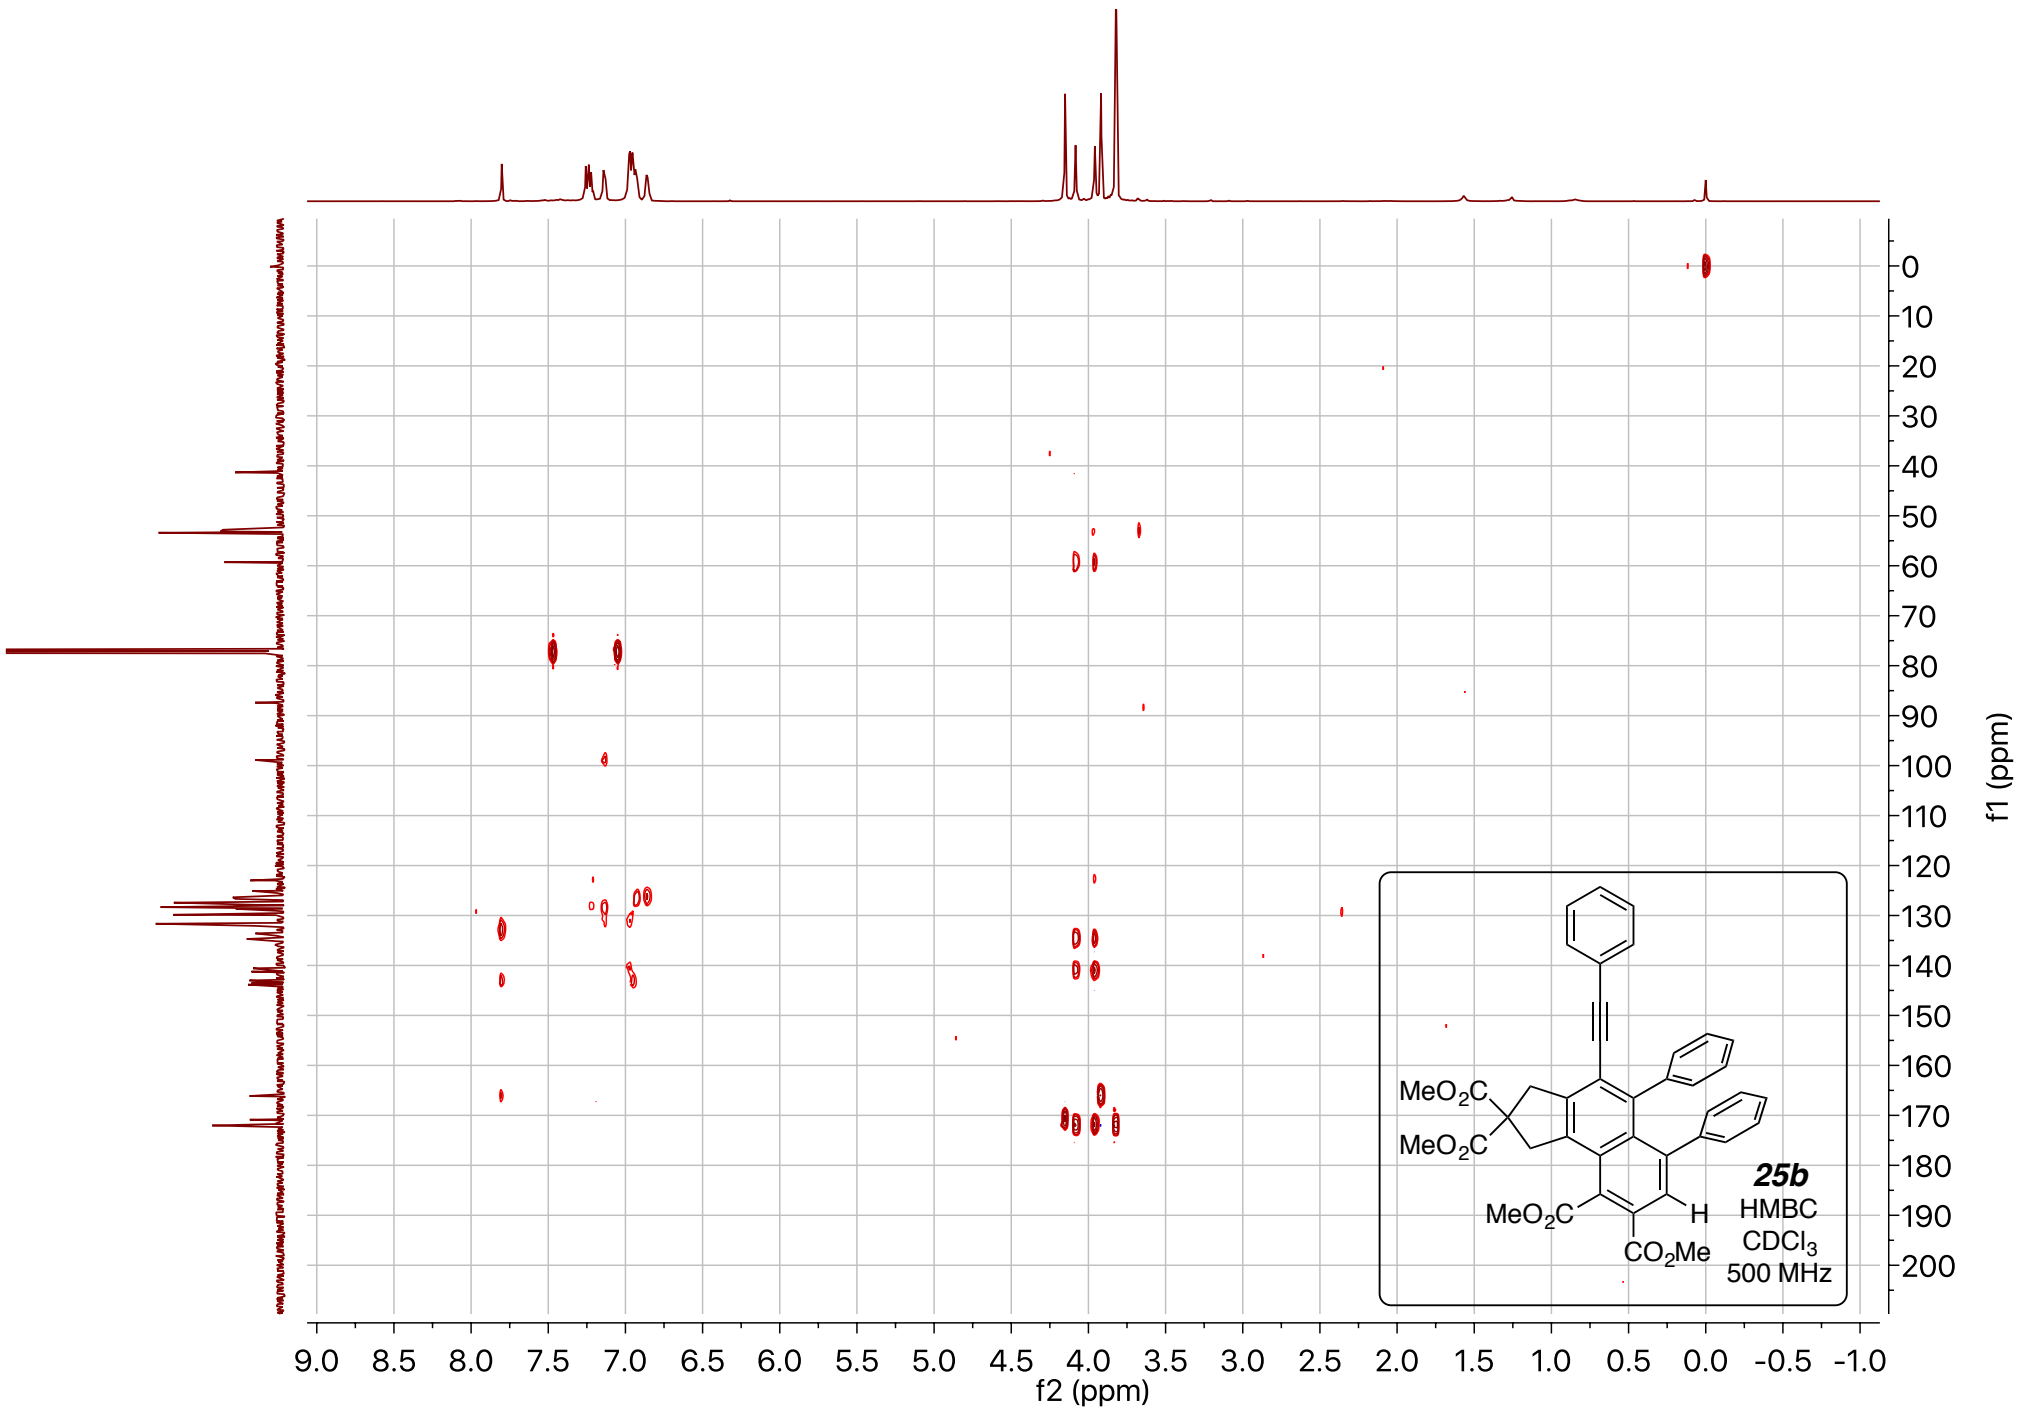

7.80  
7.26 CDCl<sub>3</sub>  
7.24  
7.23  
7.21  
7.15  
7.13  
7.00  
6.92  
6.91  
6.78  
6.76  
6.50  
6.48

4.15  
4.07  
3.95  
3.82  
3.72

— 1.56 H<sub>2</sub>O

— 0.00

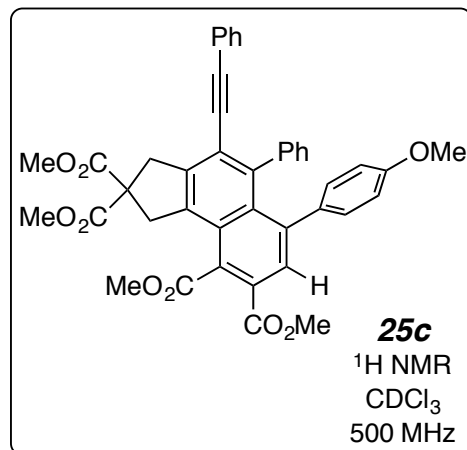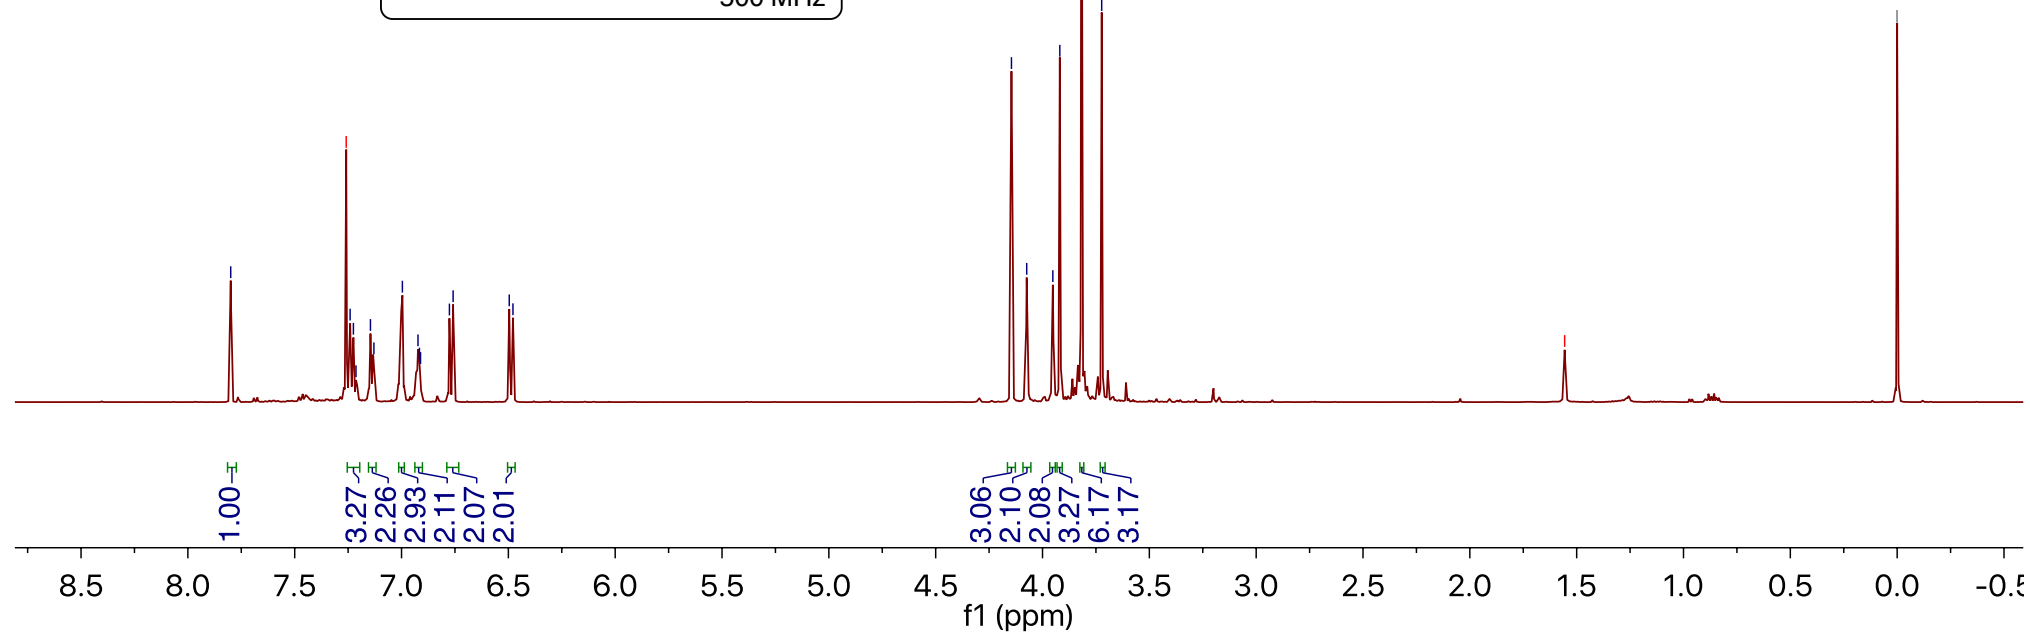



172.0  
170.9  
166.2  
158.1  
143.6  
143.5  
141.1  
140.8  
135.7  
134.6  
133.9  
131.8  
131.7  
131.4  
131.0  
129.5  
128.7  
128.3  
127.9  
127.1  
126.6  
125.1  
123.0  
122.9  
113.1  
—98.8

—87.5

77.4 CDCl<sub>3</sub>  
77.2 CDCl<sub>3</sub>  
76.9 CDCl<sub>3</sub>

59.3  
55.5  
53.4  
53.1  
52.8

41.3  
41.2

—0.1

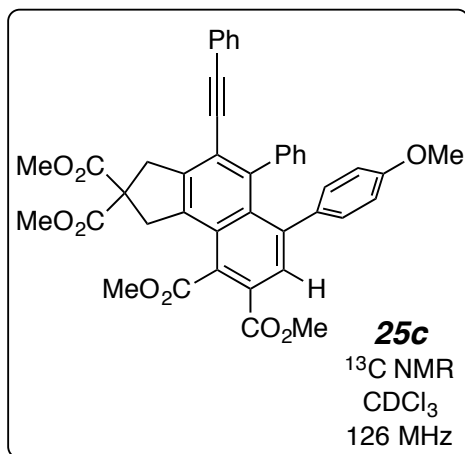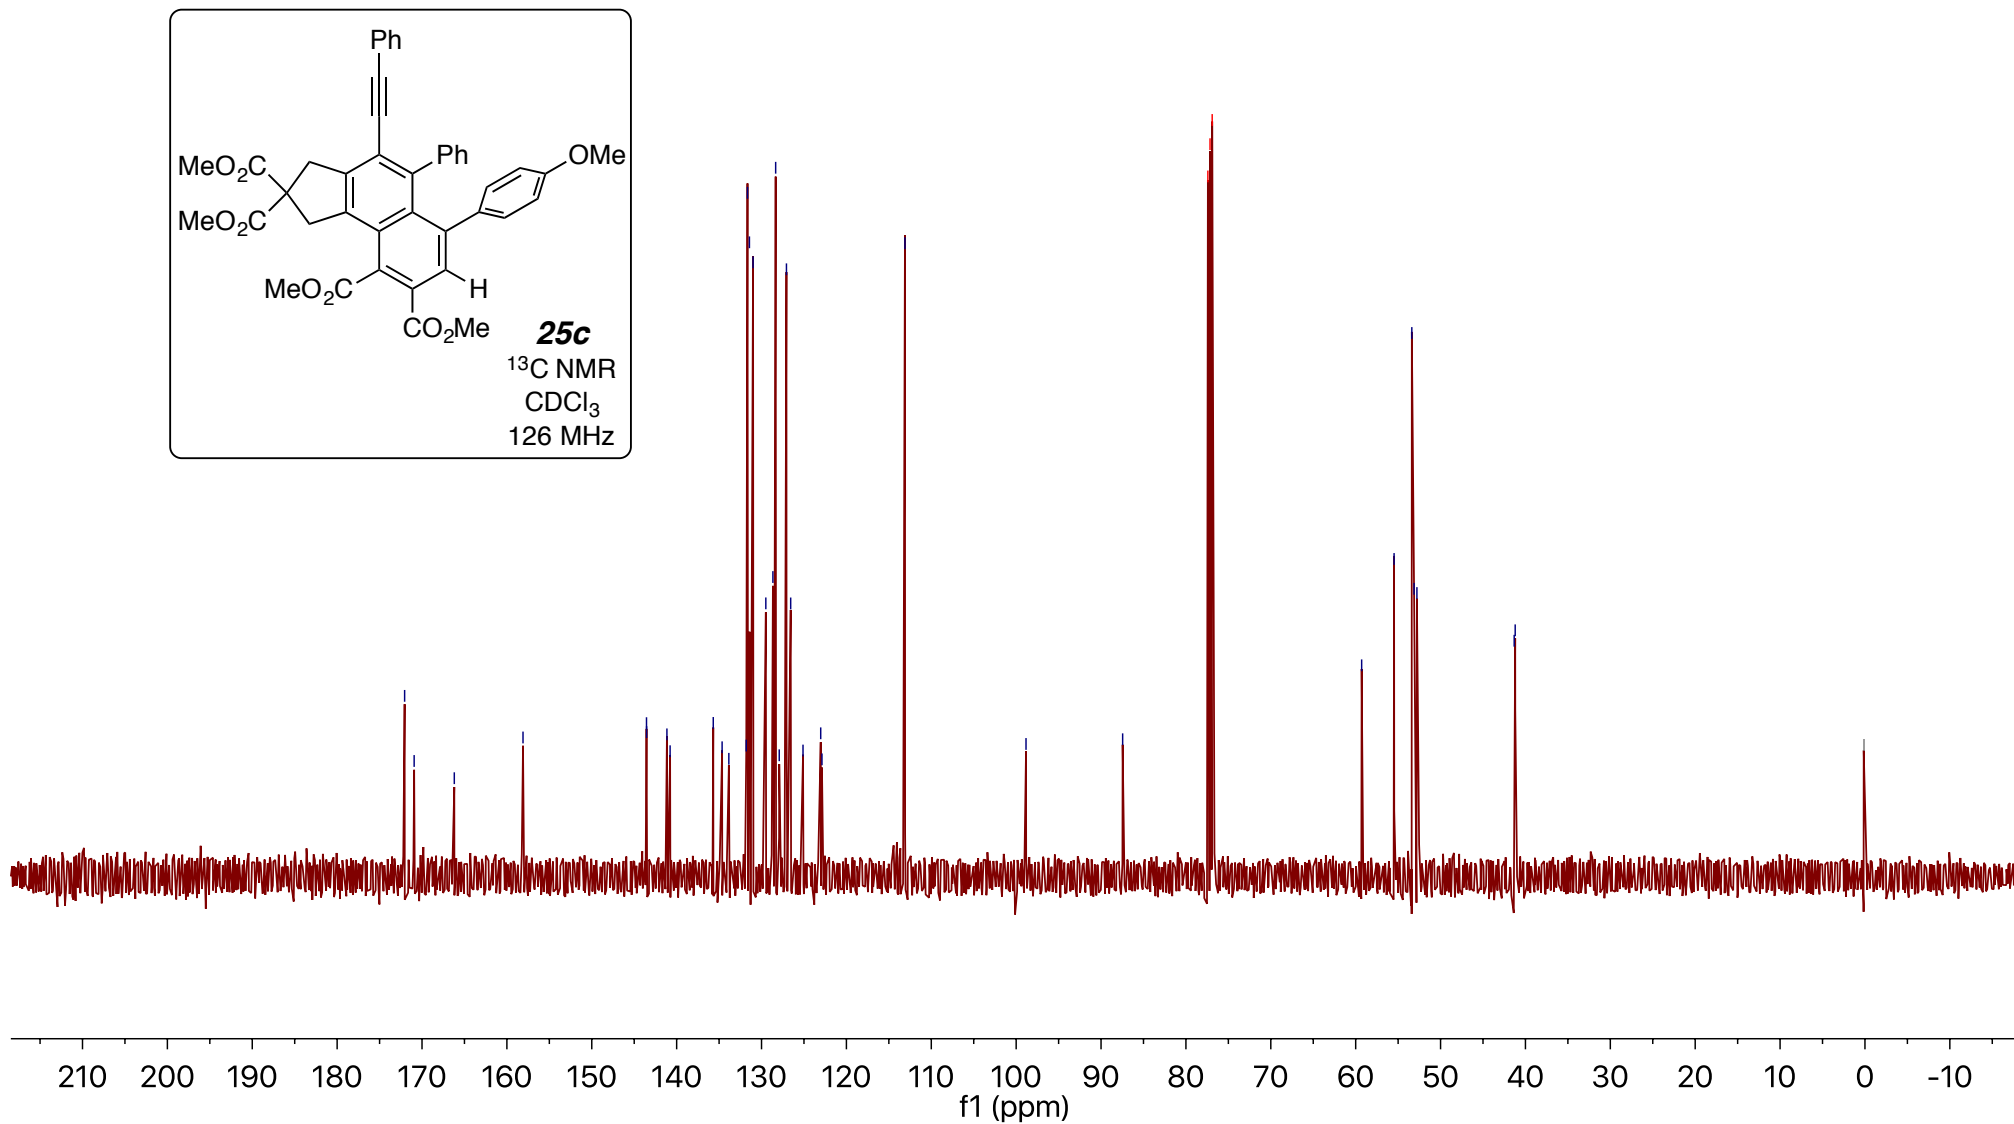

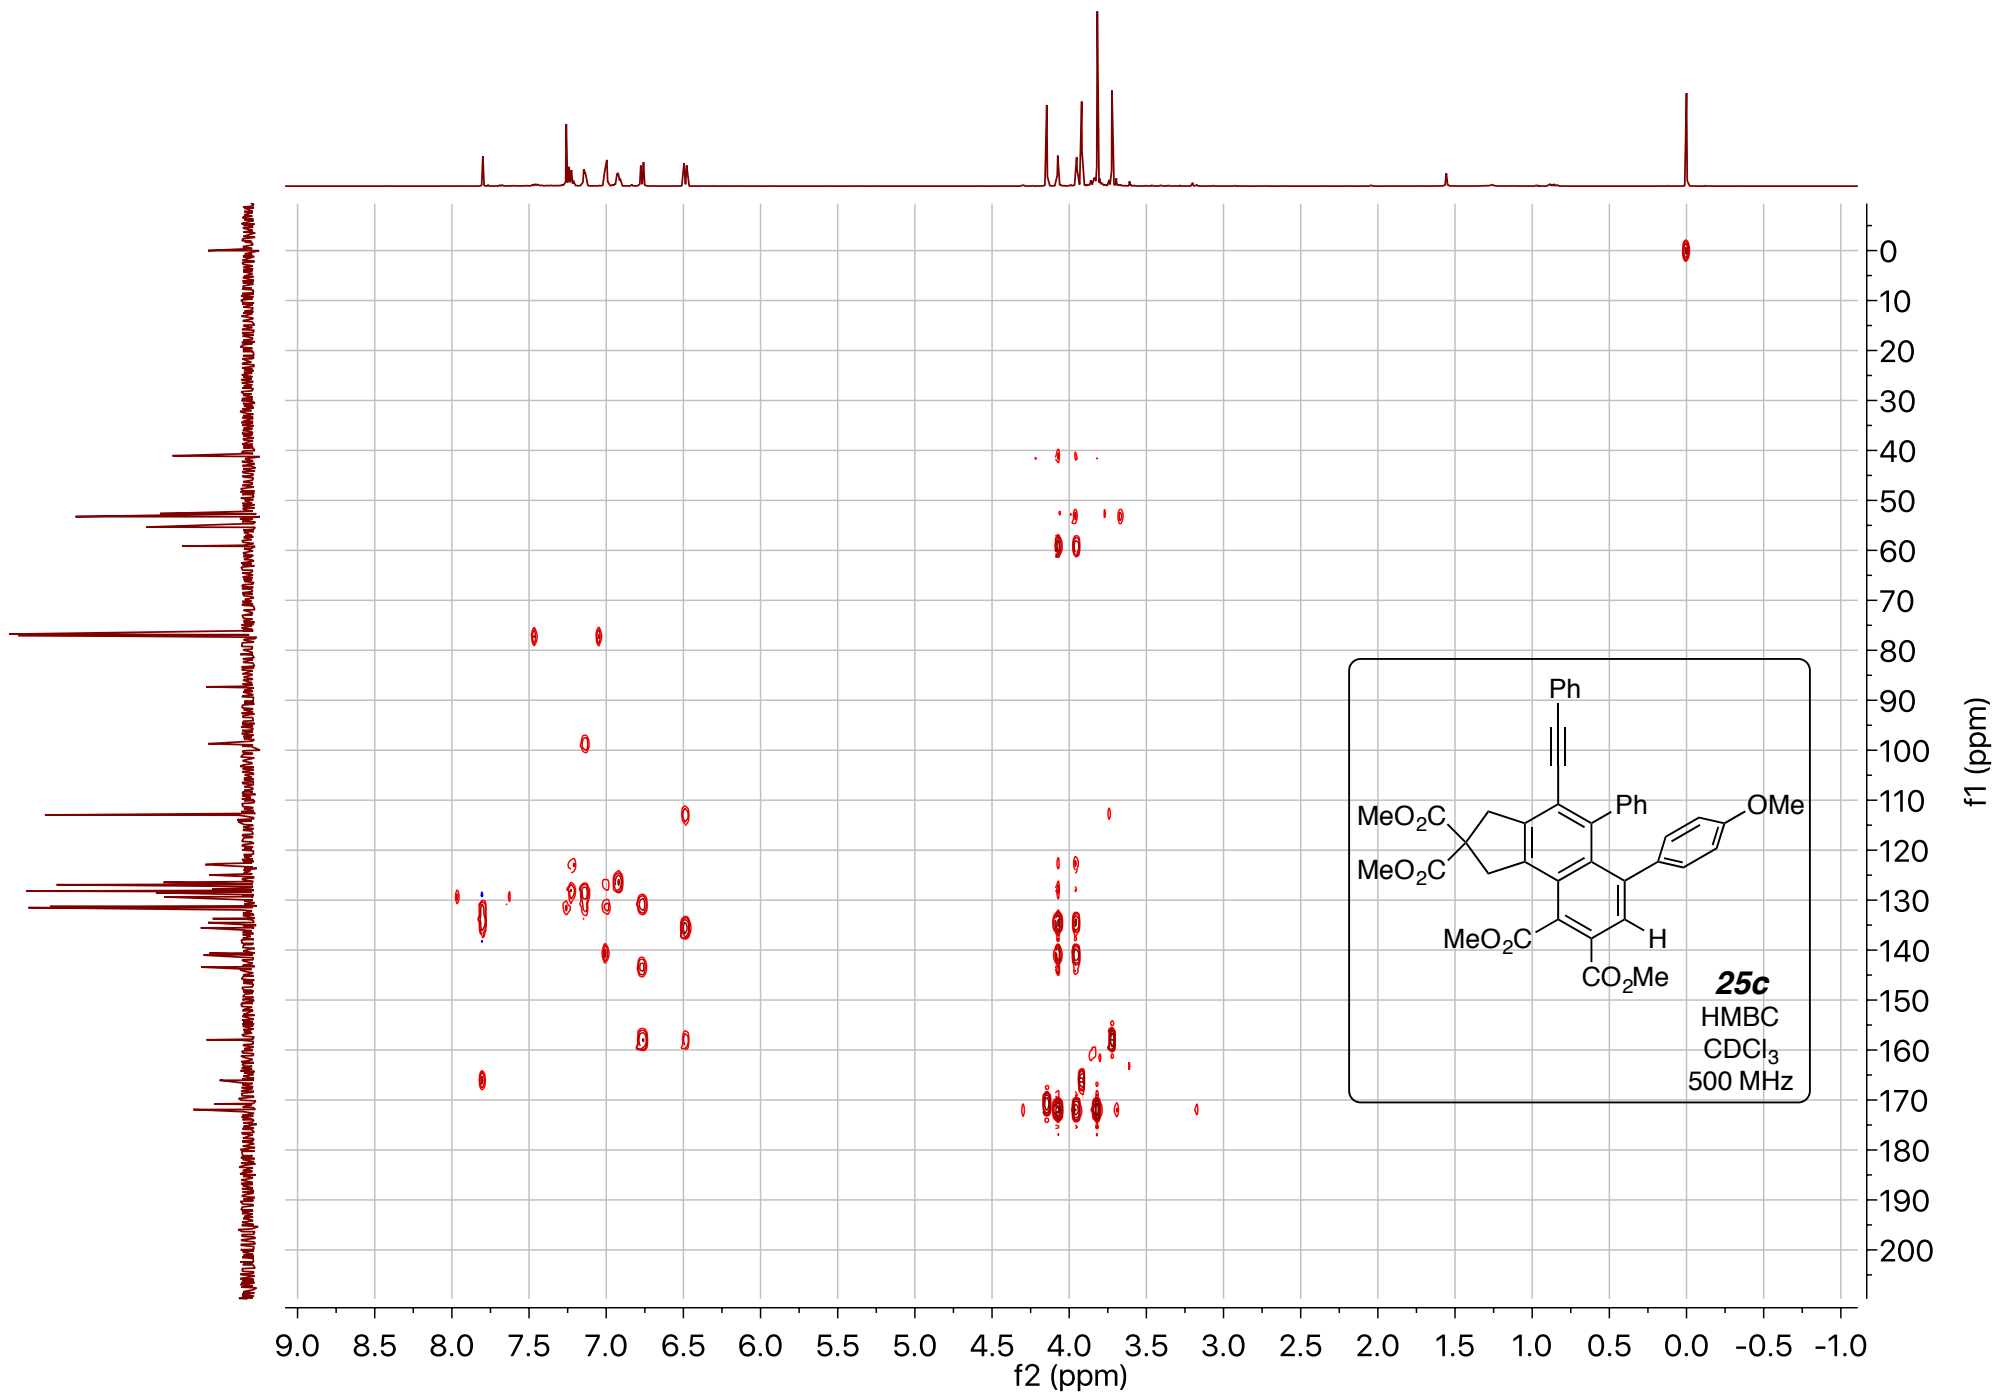

7.77  
7.63  
7.62  
7.26 CDCl<sub>3</sub>  
7.24  
7.23  
7.21  
6.98  
6.97  
6.96  
6.94  
6.92

4.15  
4.08  
3.96  
3.93  
3.90  
3.82

— 1.55 H<sub>2</sub>O

— 0.00

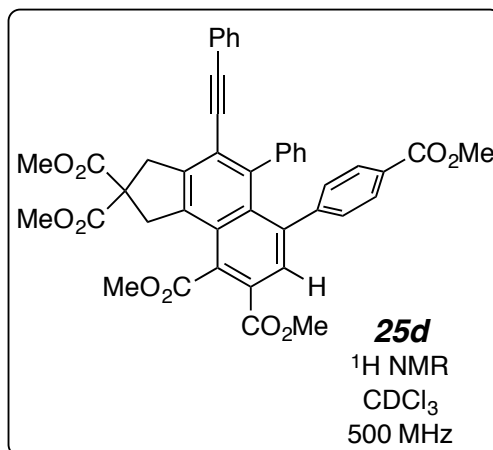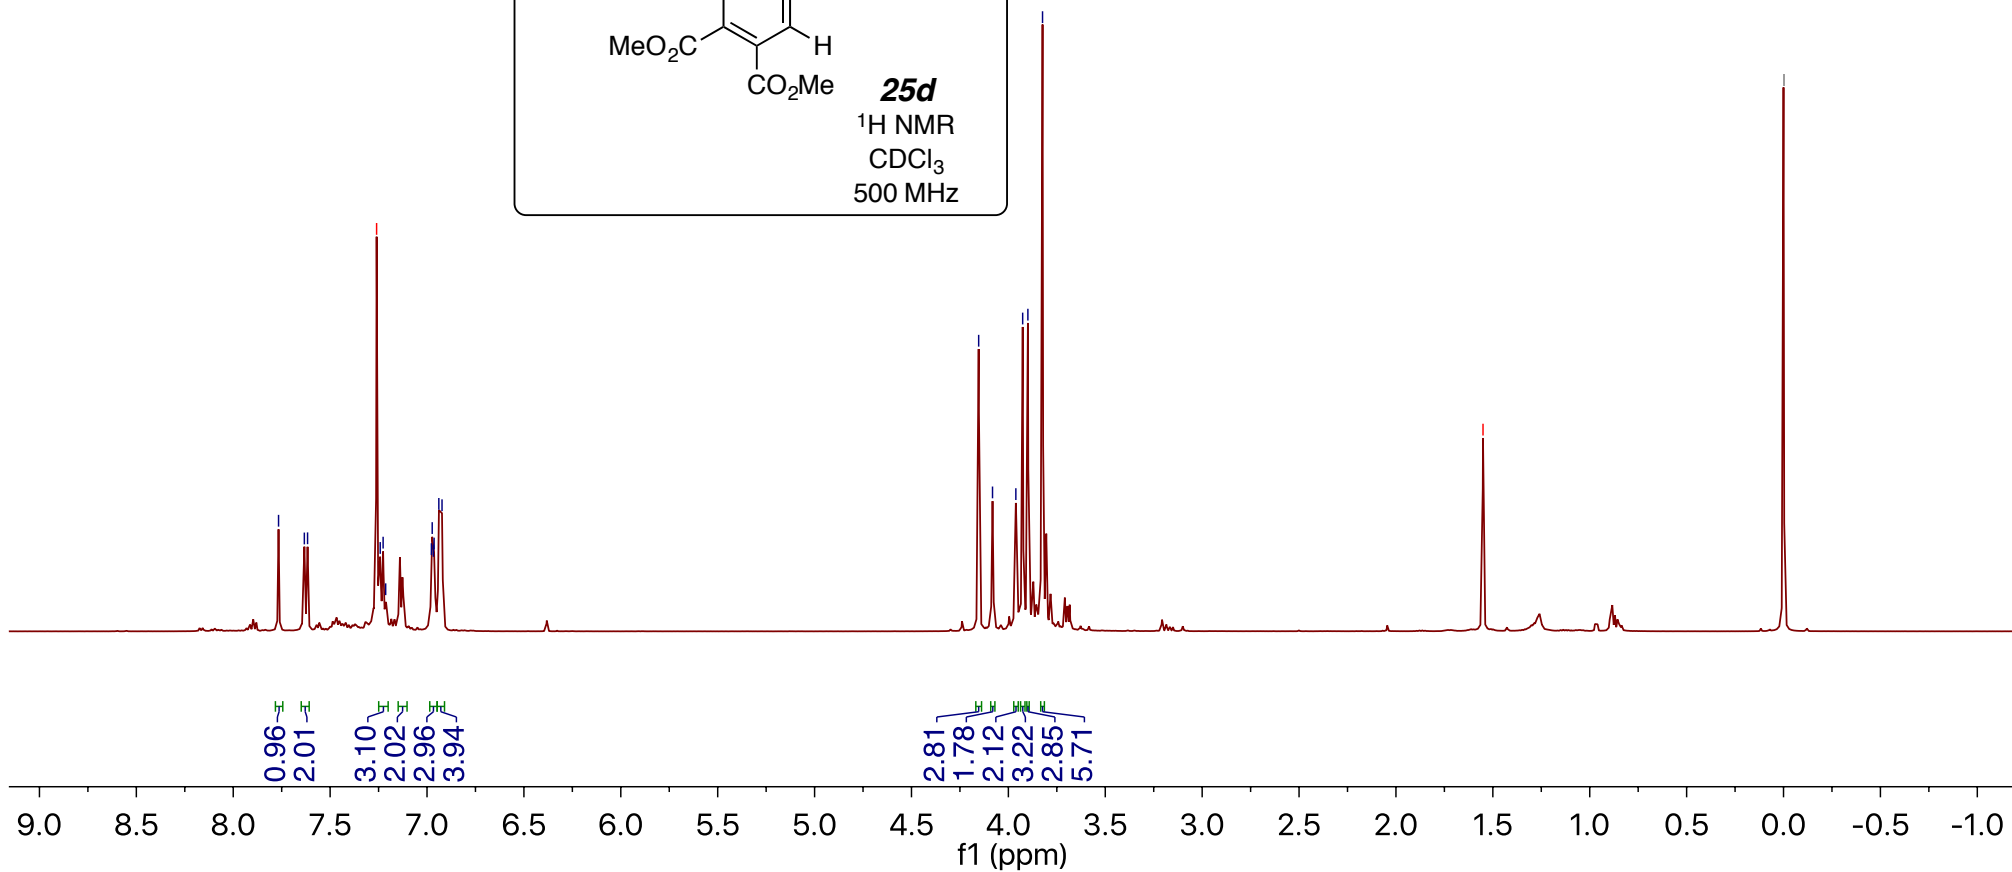



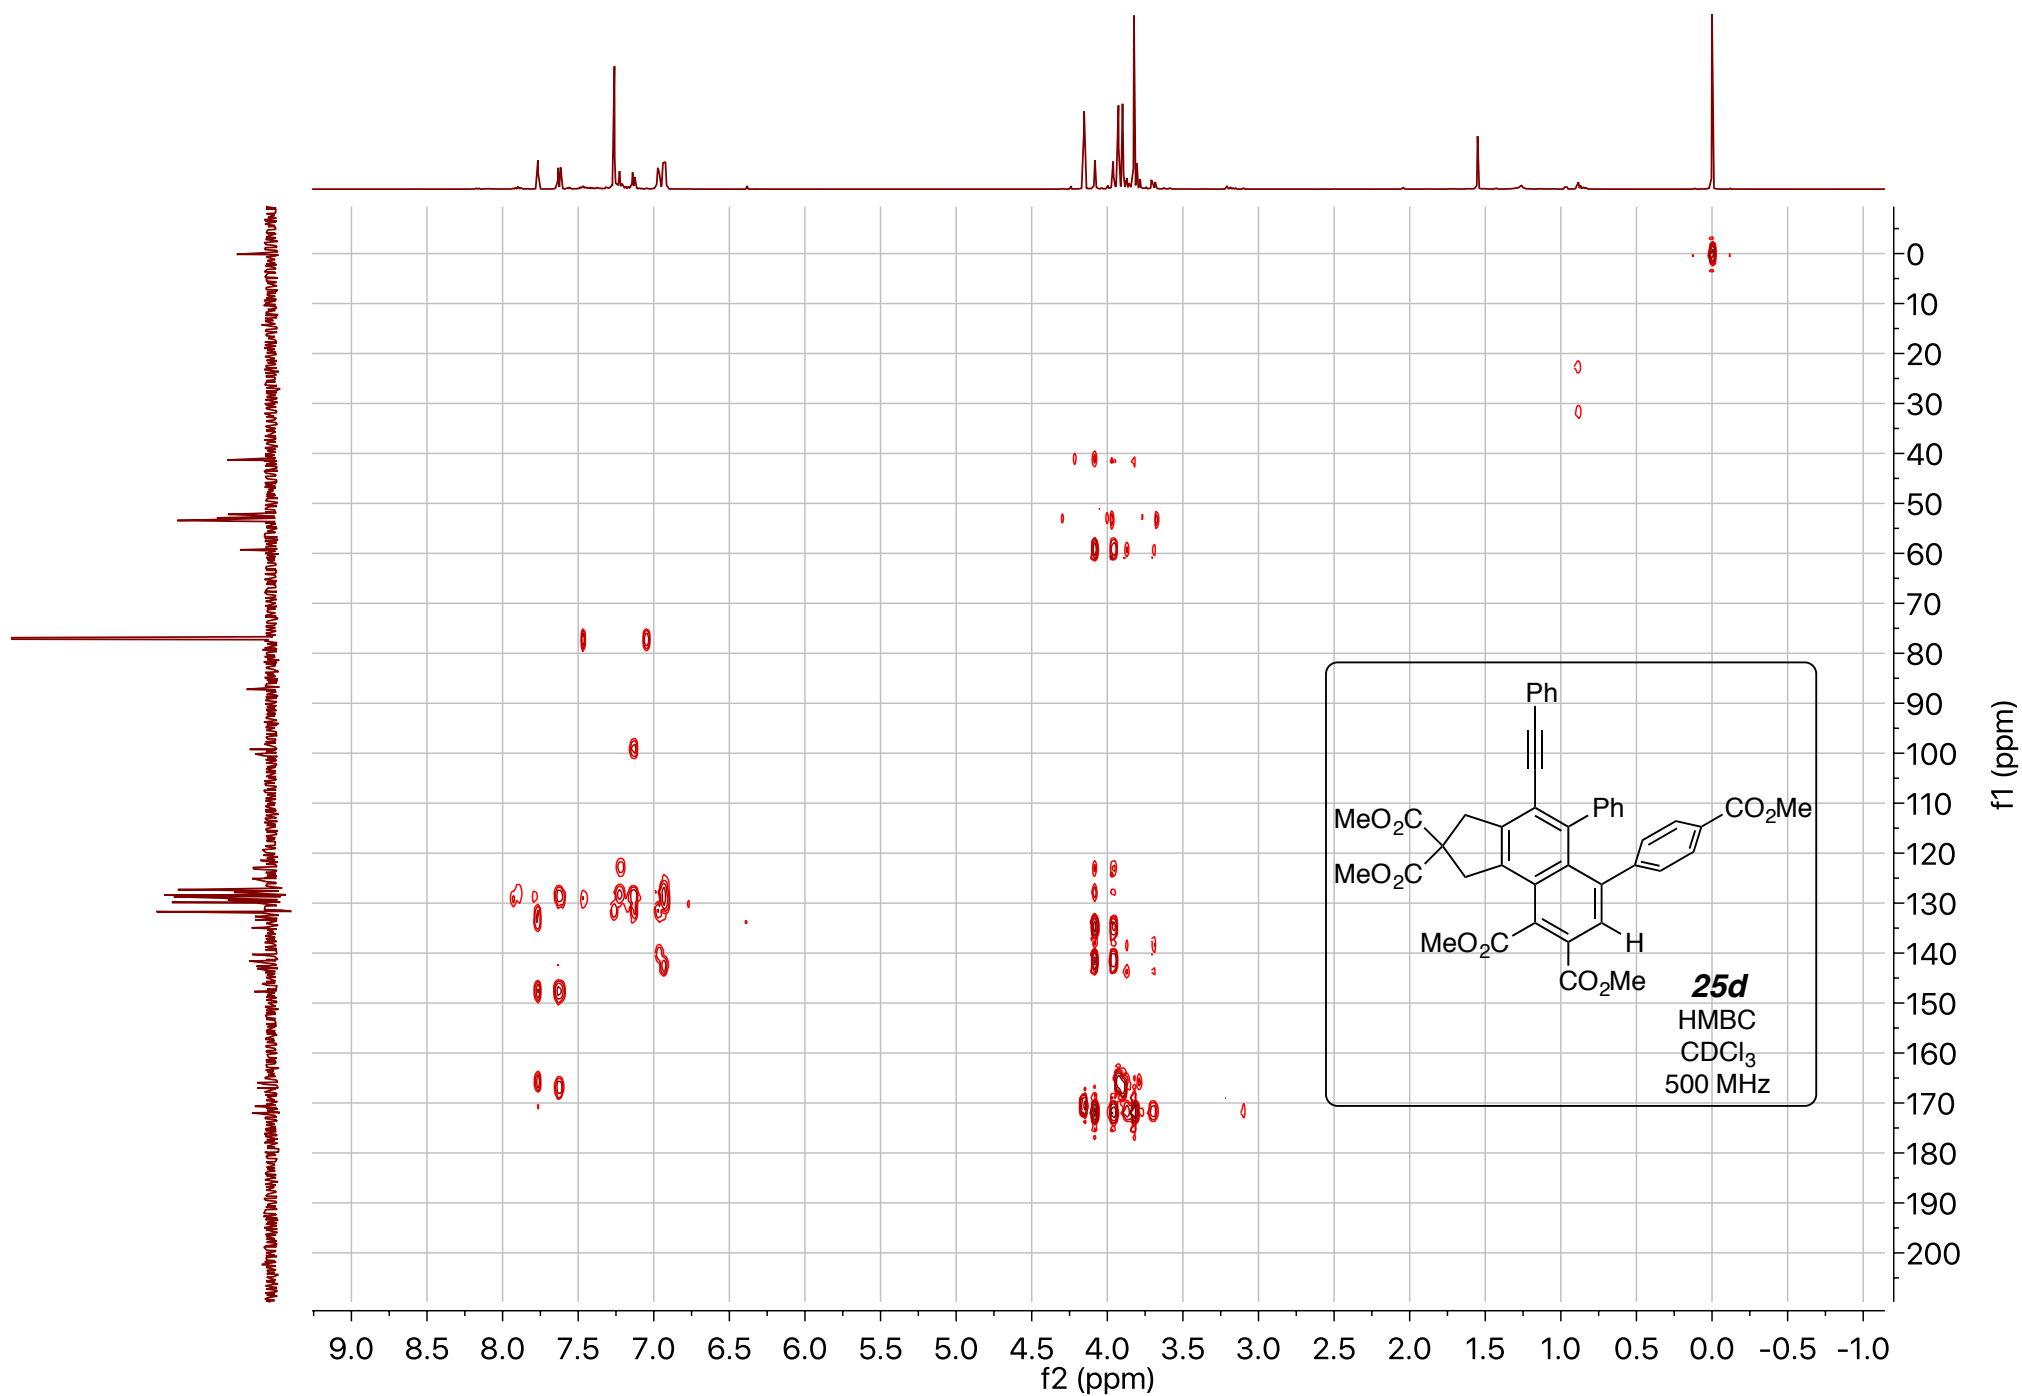

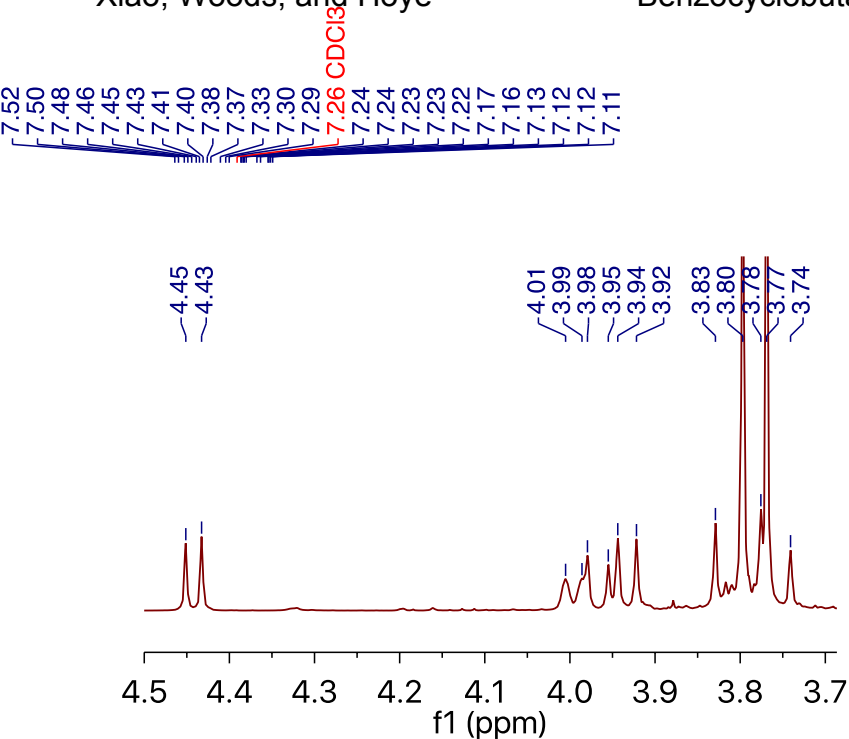

4.45  
4.43  
4.01  
3.99  
3.98  
3.95  
3.94  
3.92  
3.83  
3.80  
3.78  
3.77  
3.74

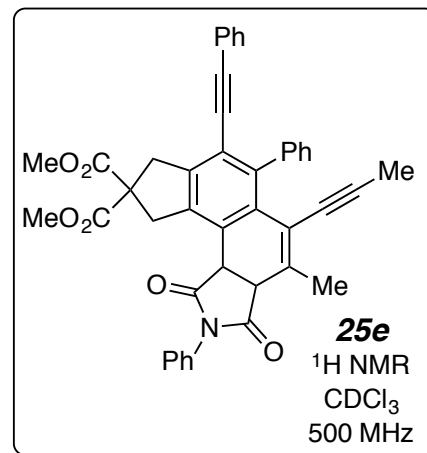

2.16  
2.16

1.56 H<sub>2</sub>O  
1.45

0.00

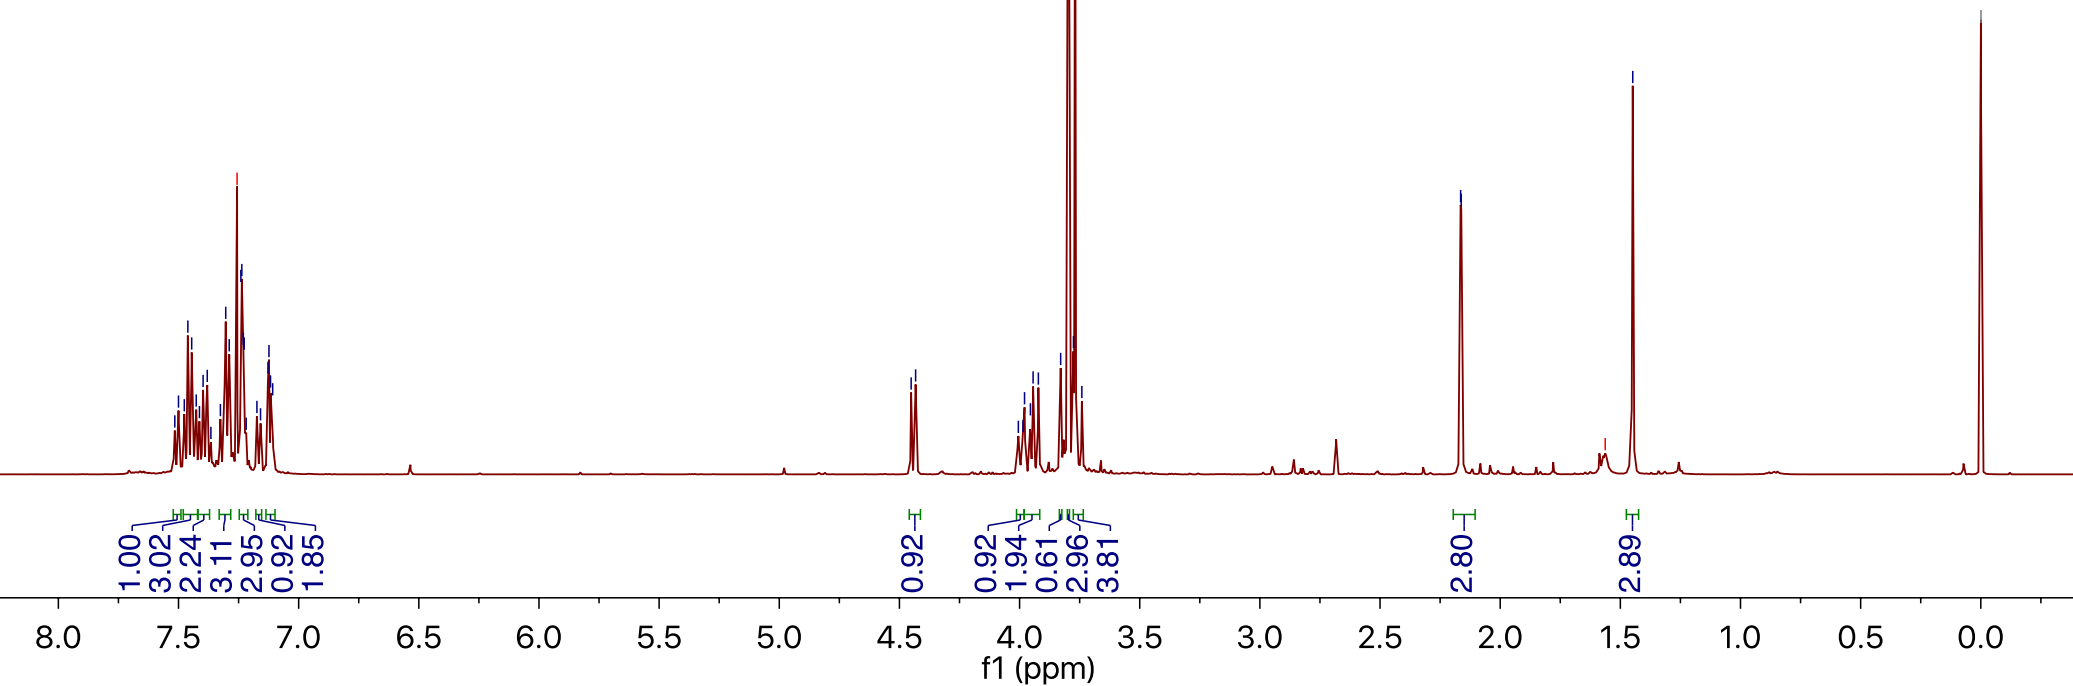



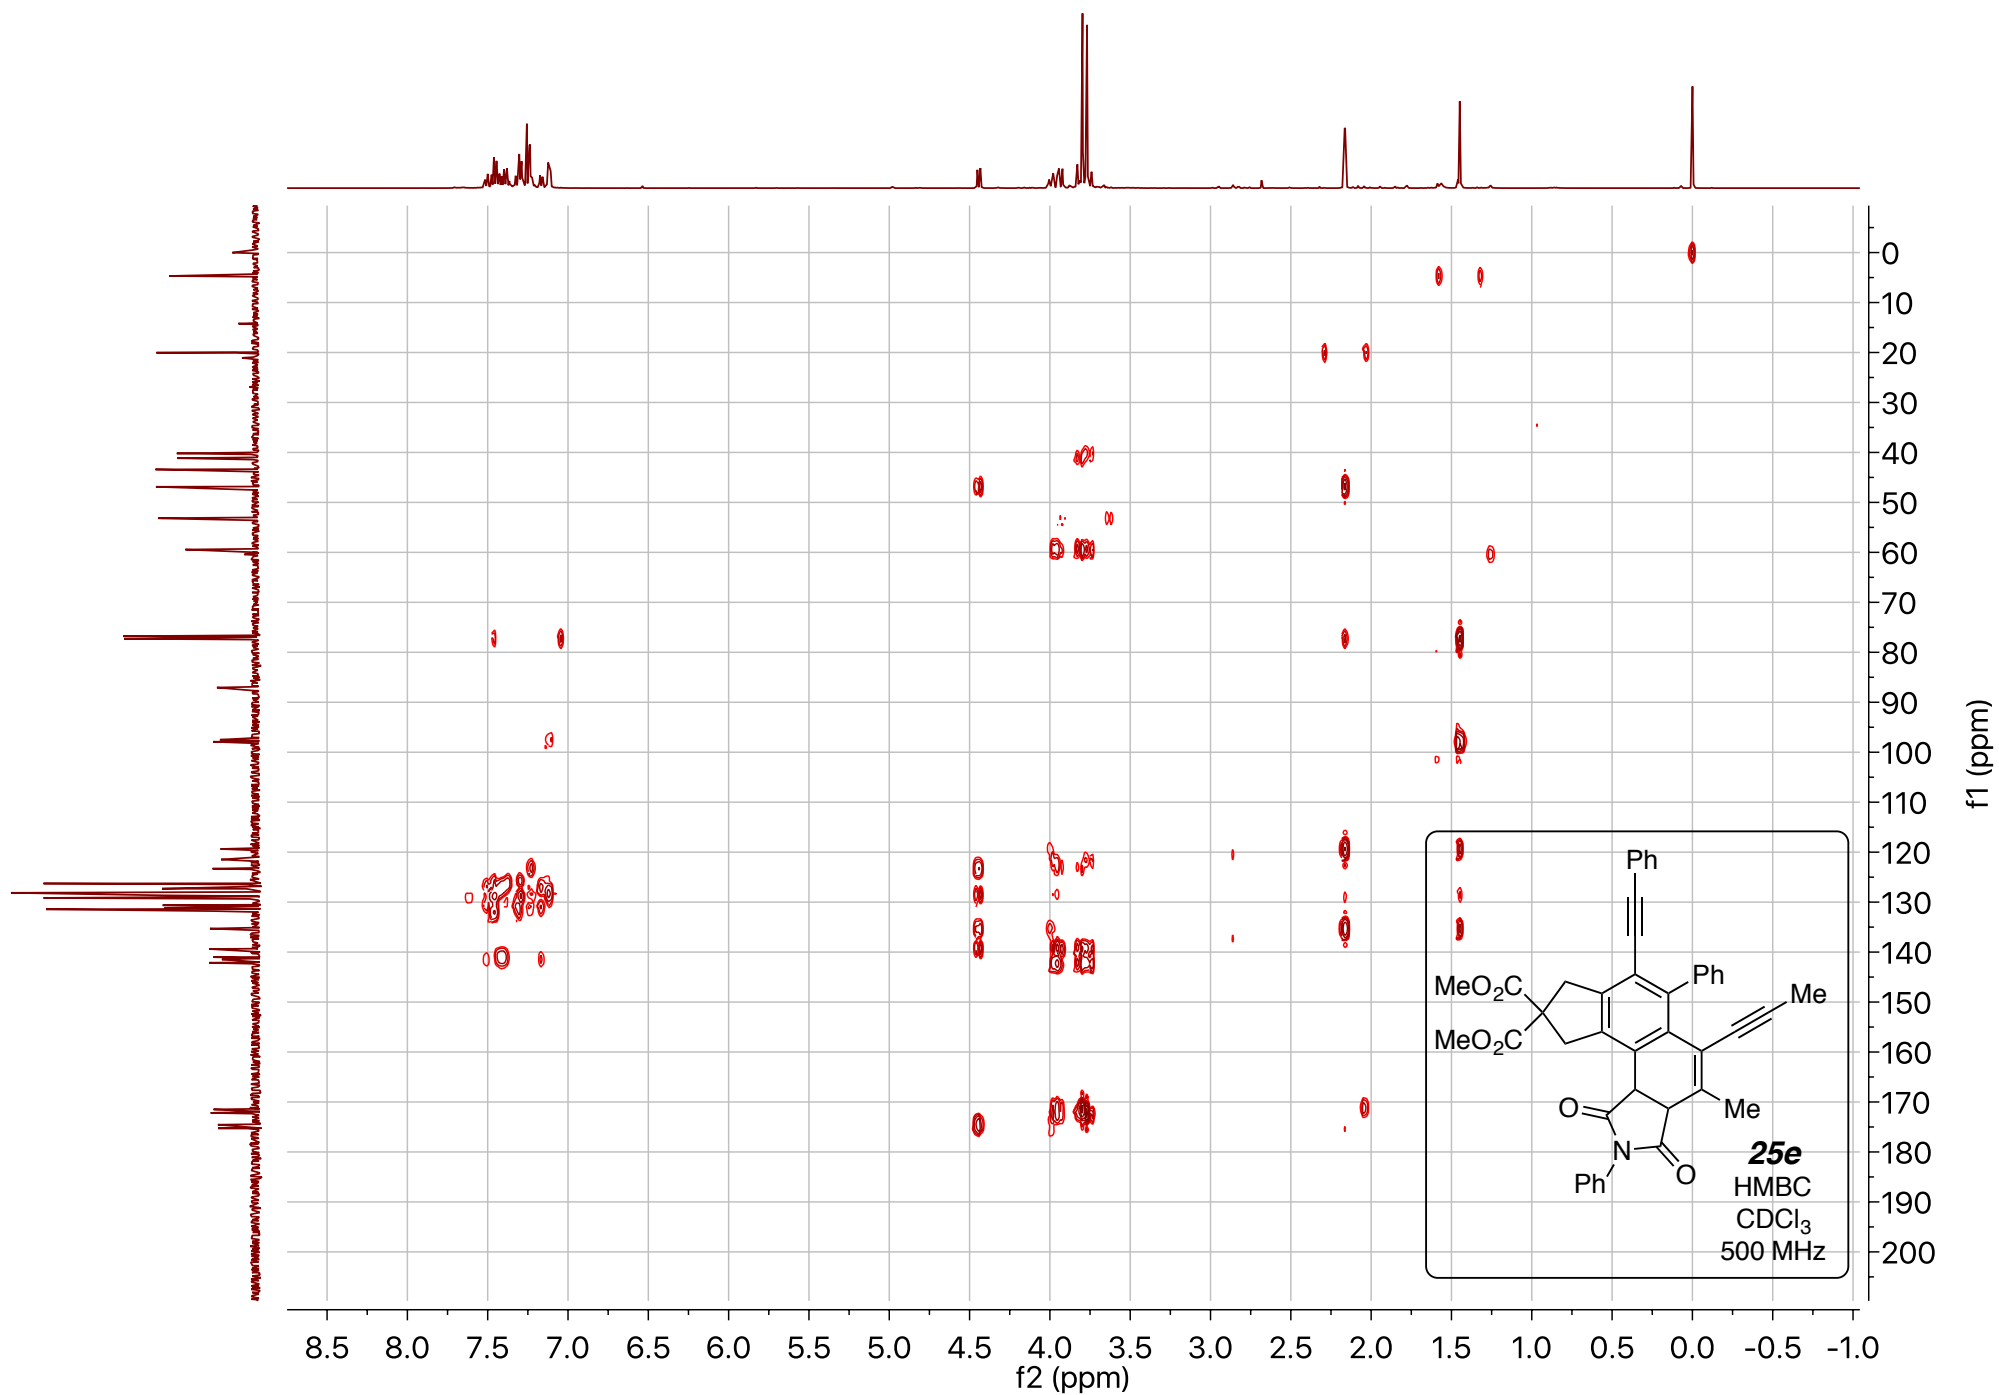



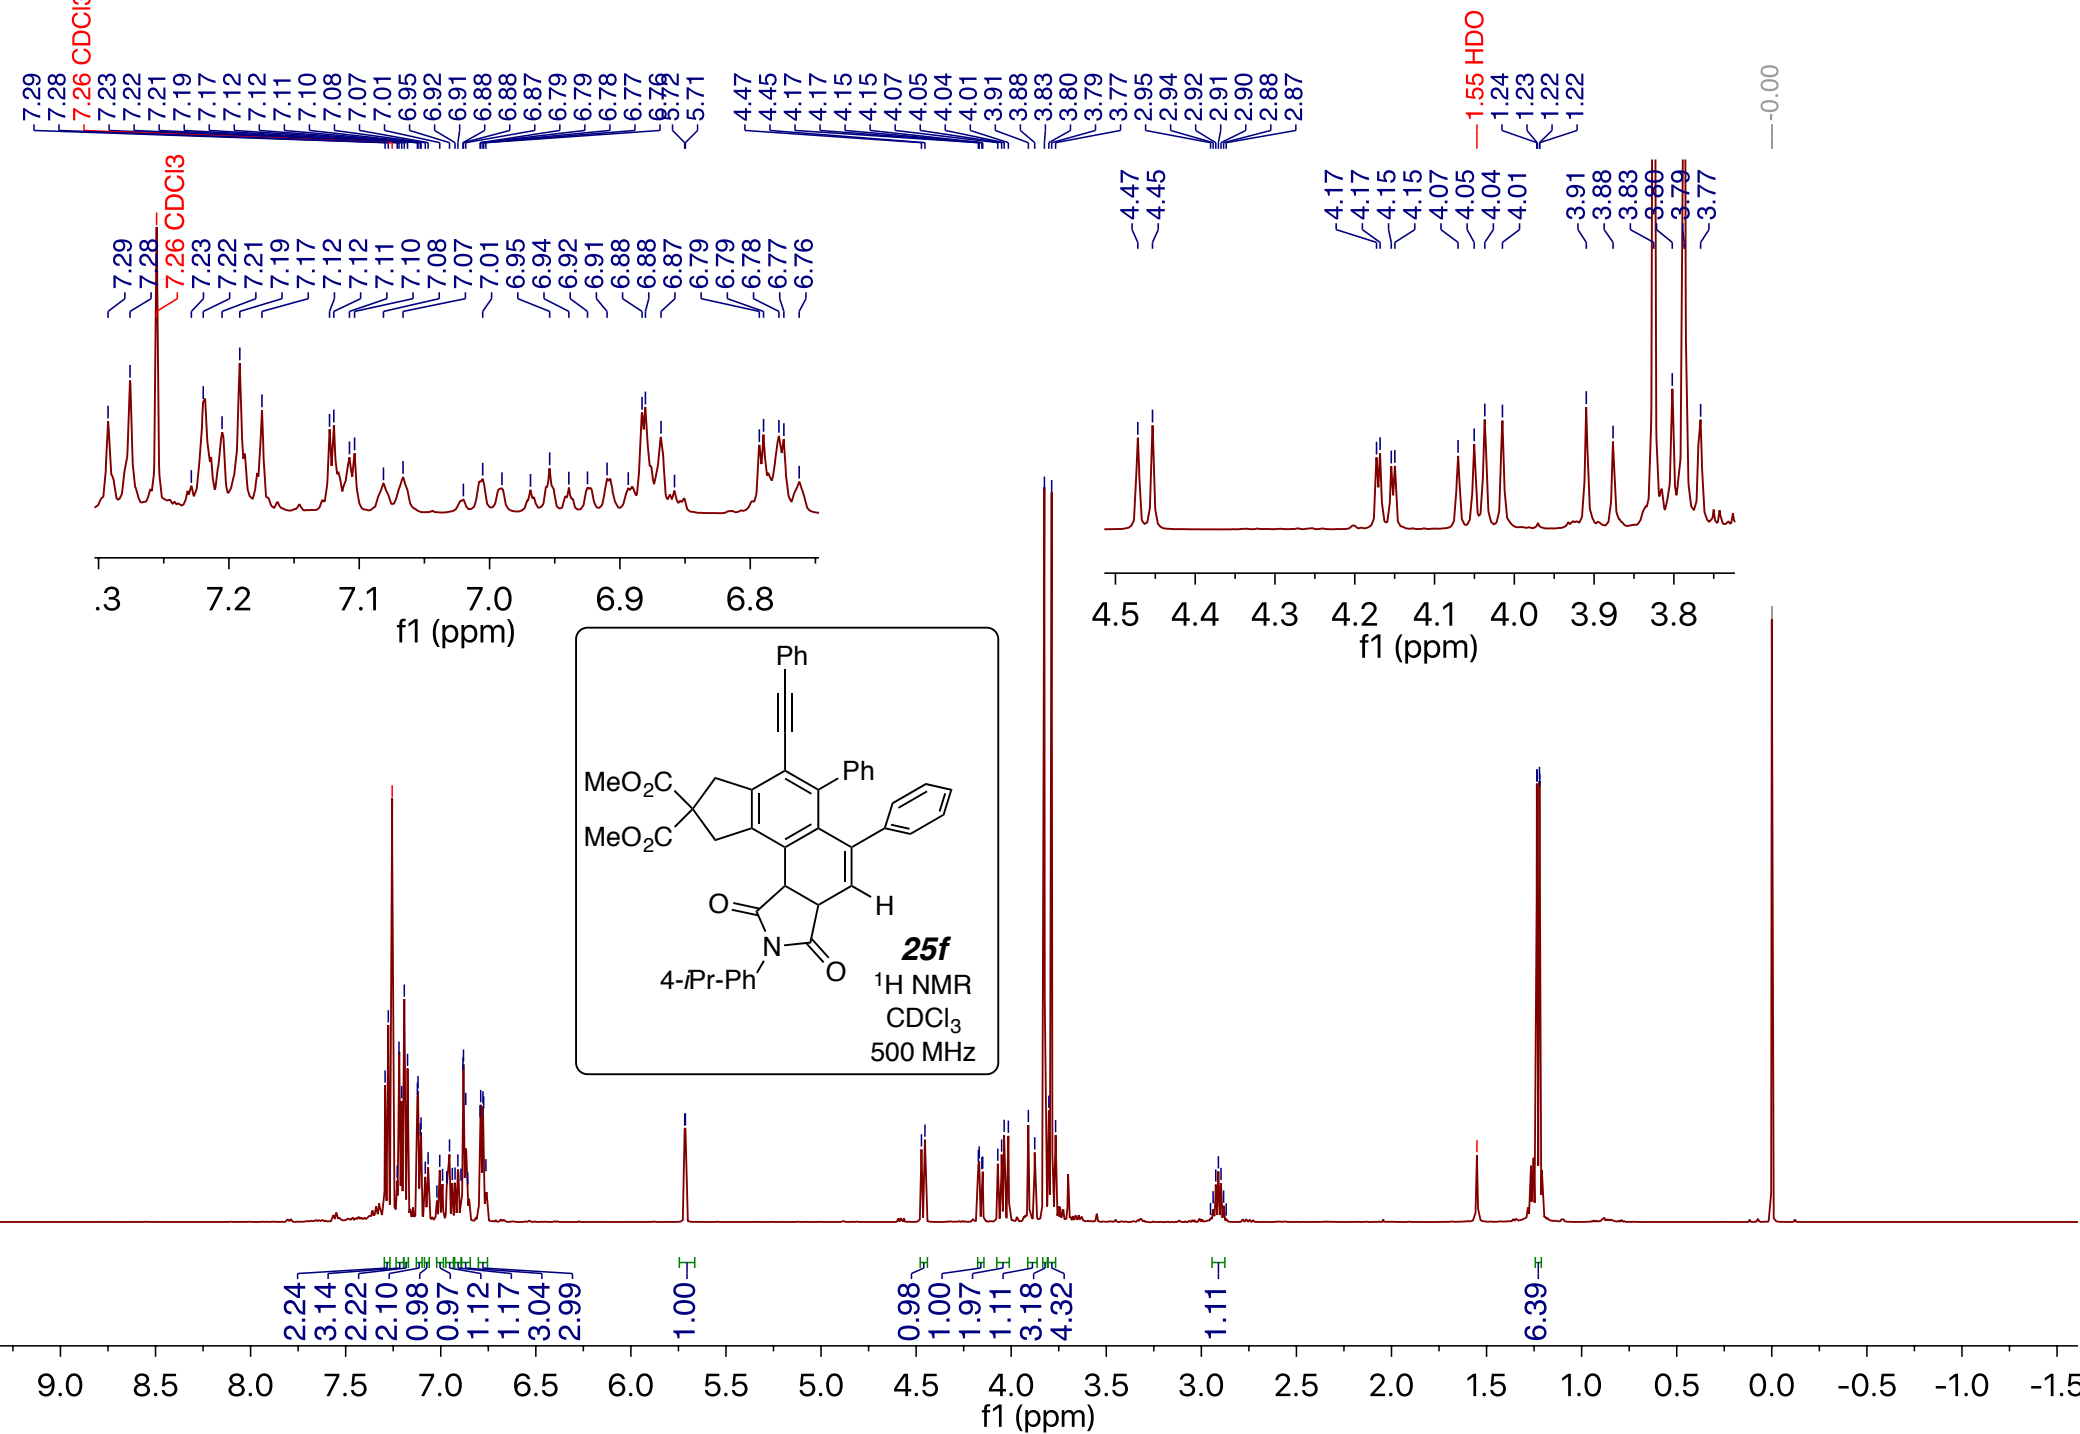

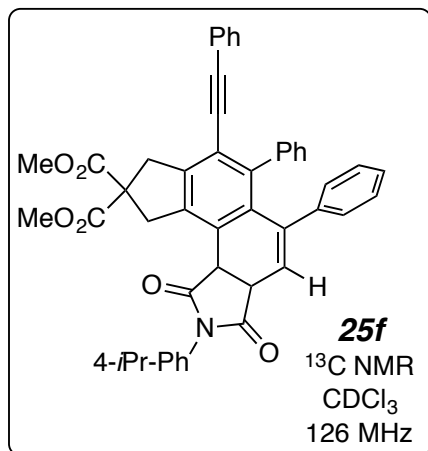

177.0  
175.1  
172.3  
171.7

149.6  
143.4  
143.4  
142.2  
141.7  
140.0  
139.9  
131.8  
131.5  
131.4  
130.7  
129.4  
128.3  
128.3  
127.9  
127.5  
127.4  
127.2  
126.7  
126.7  
126.4  
126.3  
126.2  
123.8  
123.3  
121.4  
97.2  
86.9  
77.4 CDCl<sub>3</sub>  
77.2 CDCl<sub>3</sub>  
76.9 CDCl<sub>3</sub>

59.6

53.4  
53.3

43.5  
43.1  
41.5  
40.4  
34.1

24.0

0.1

210 200 190 180 170 160 150 140 130 120 110 100 90 80 70 60 50 40 30 20 10 0 -10  
f1 (ppm)

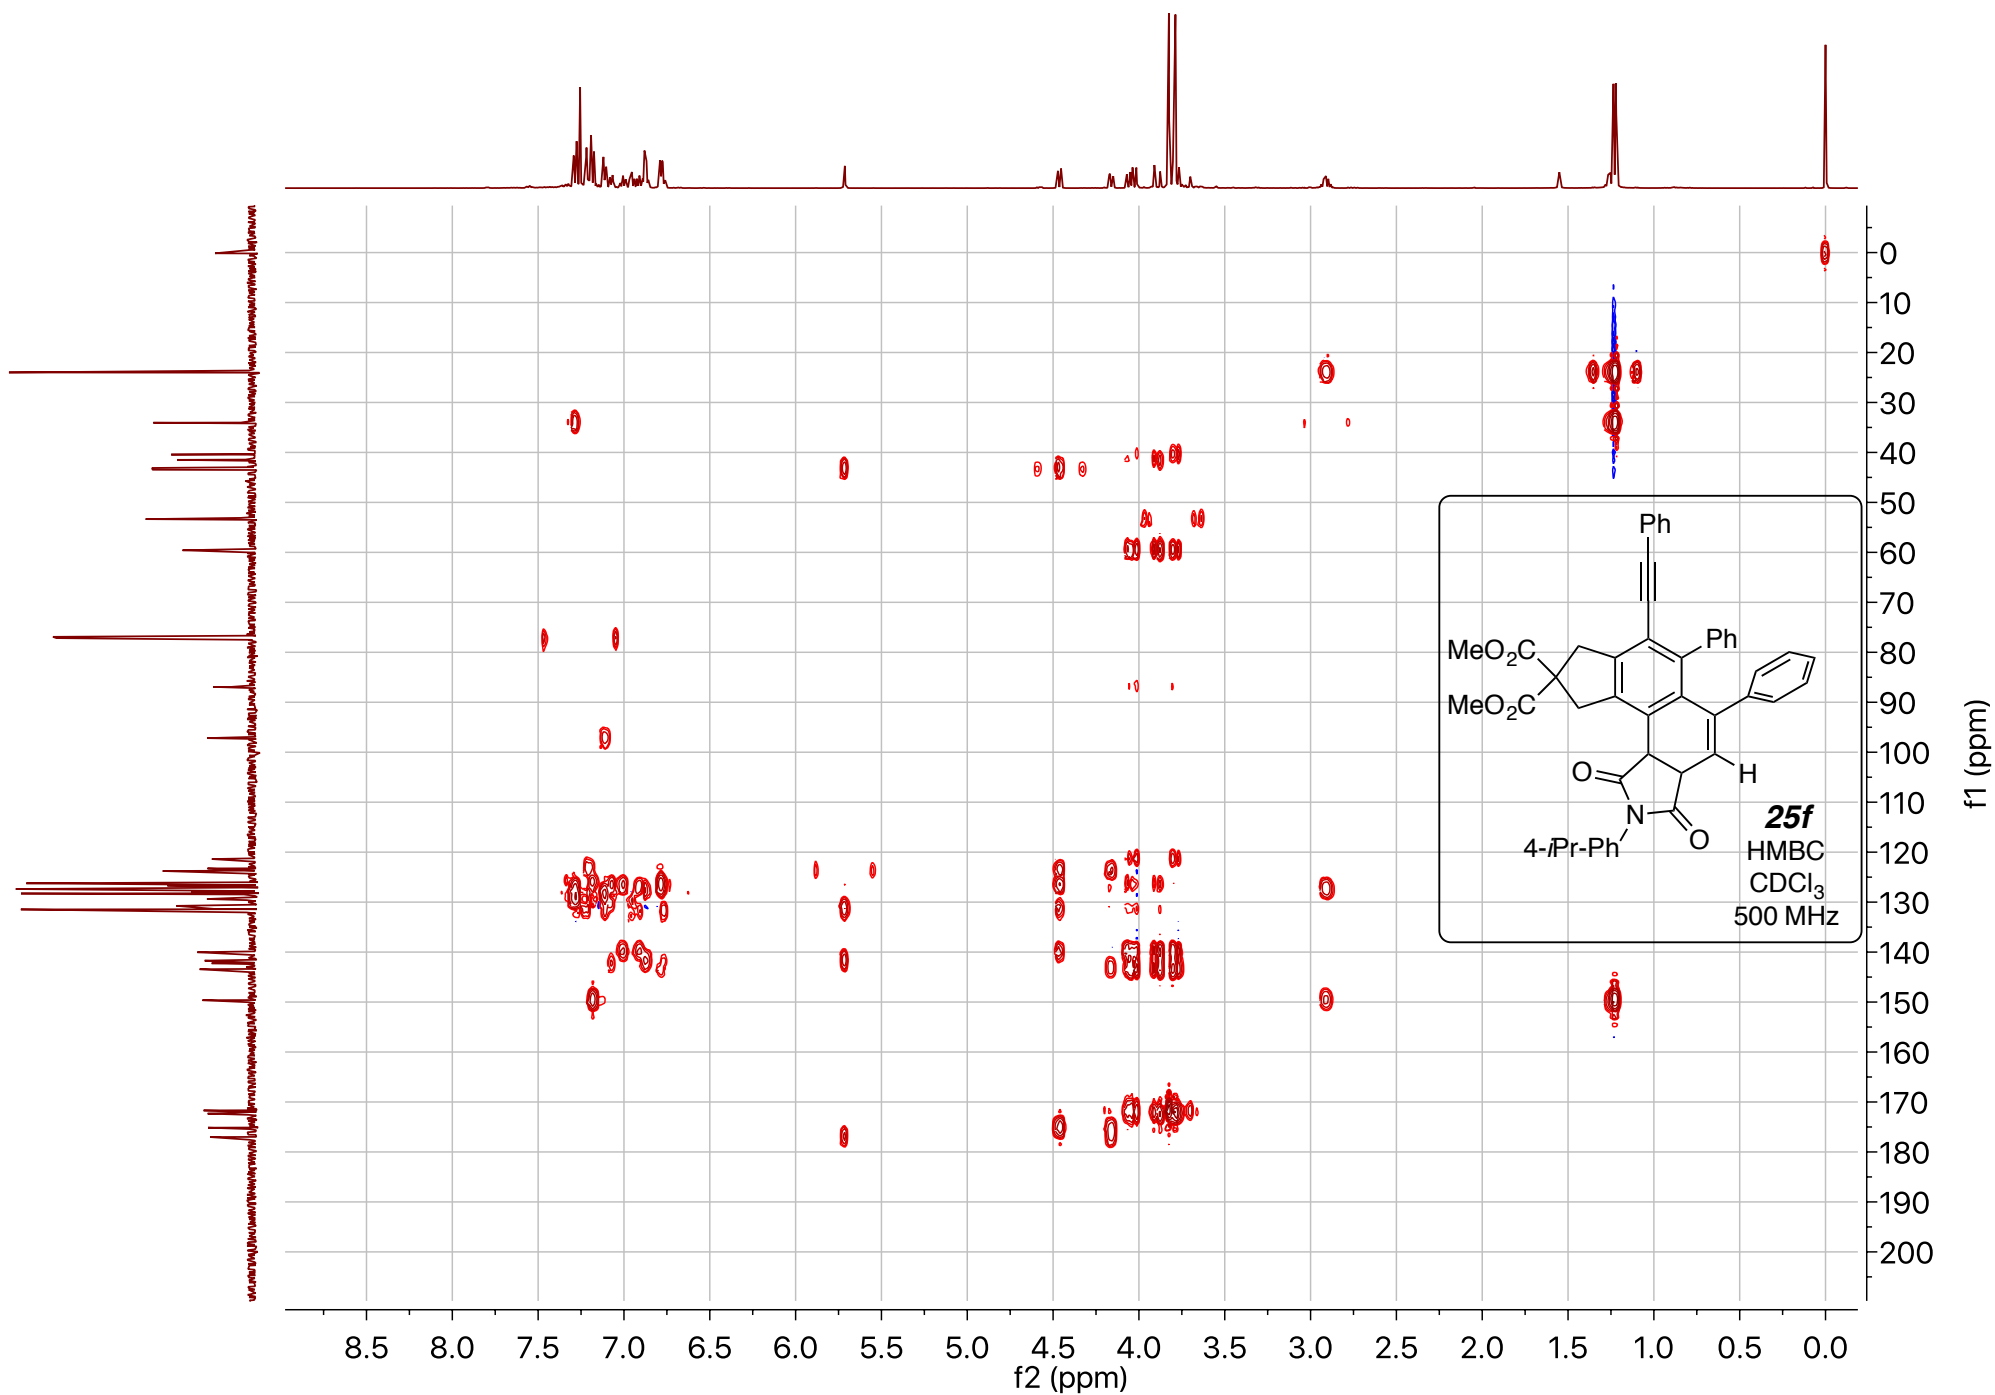

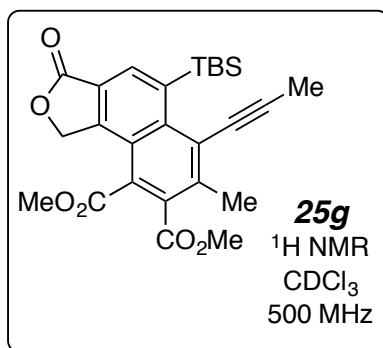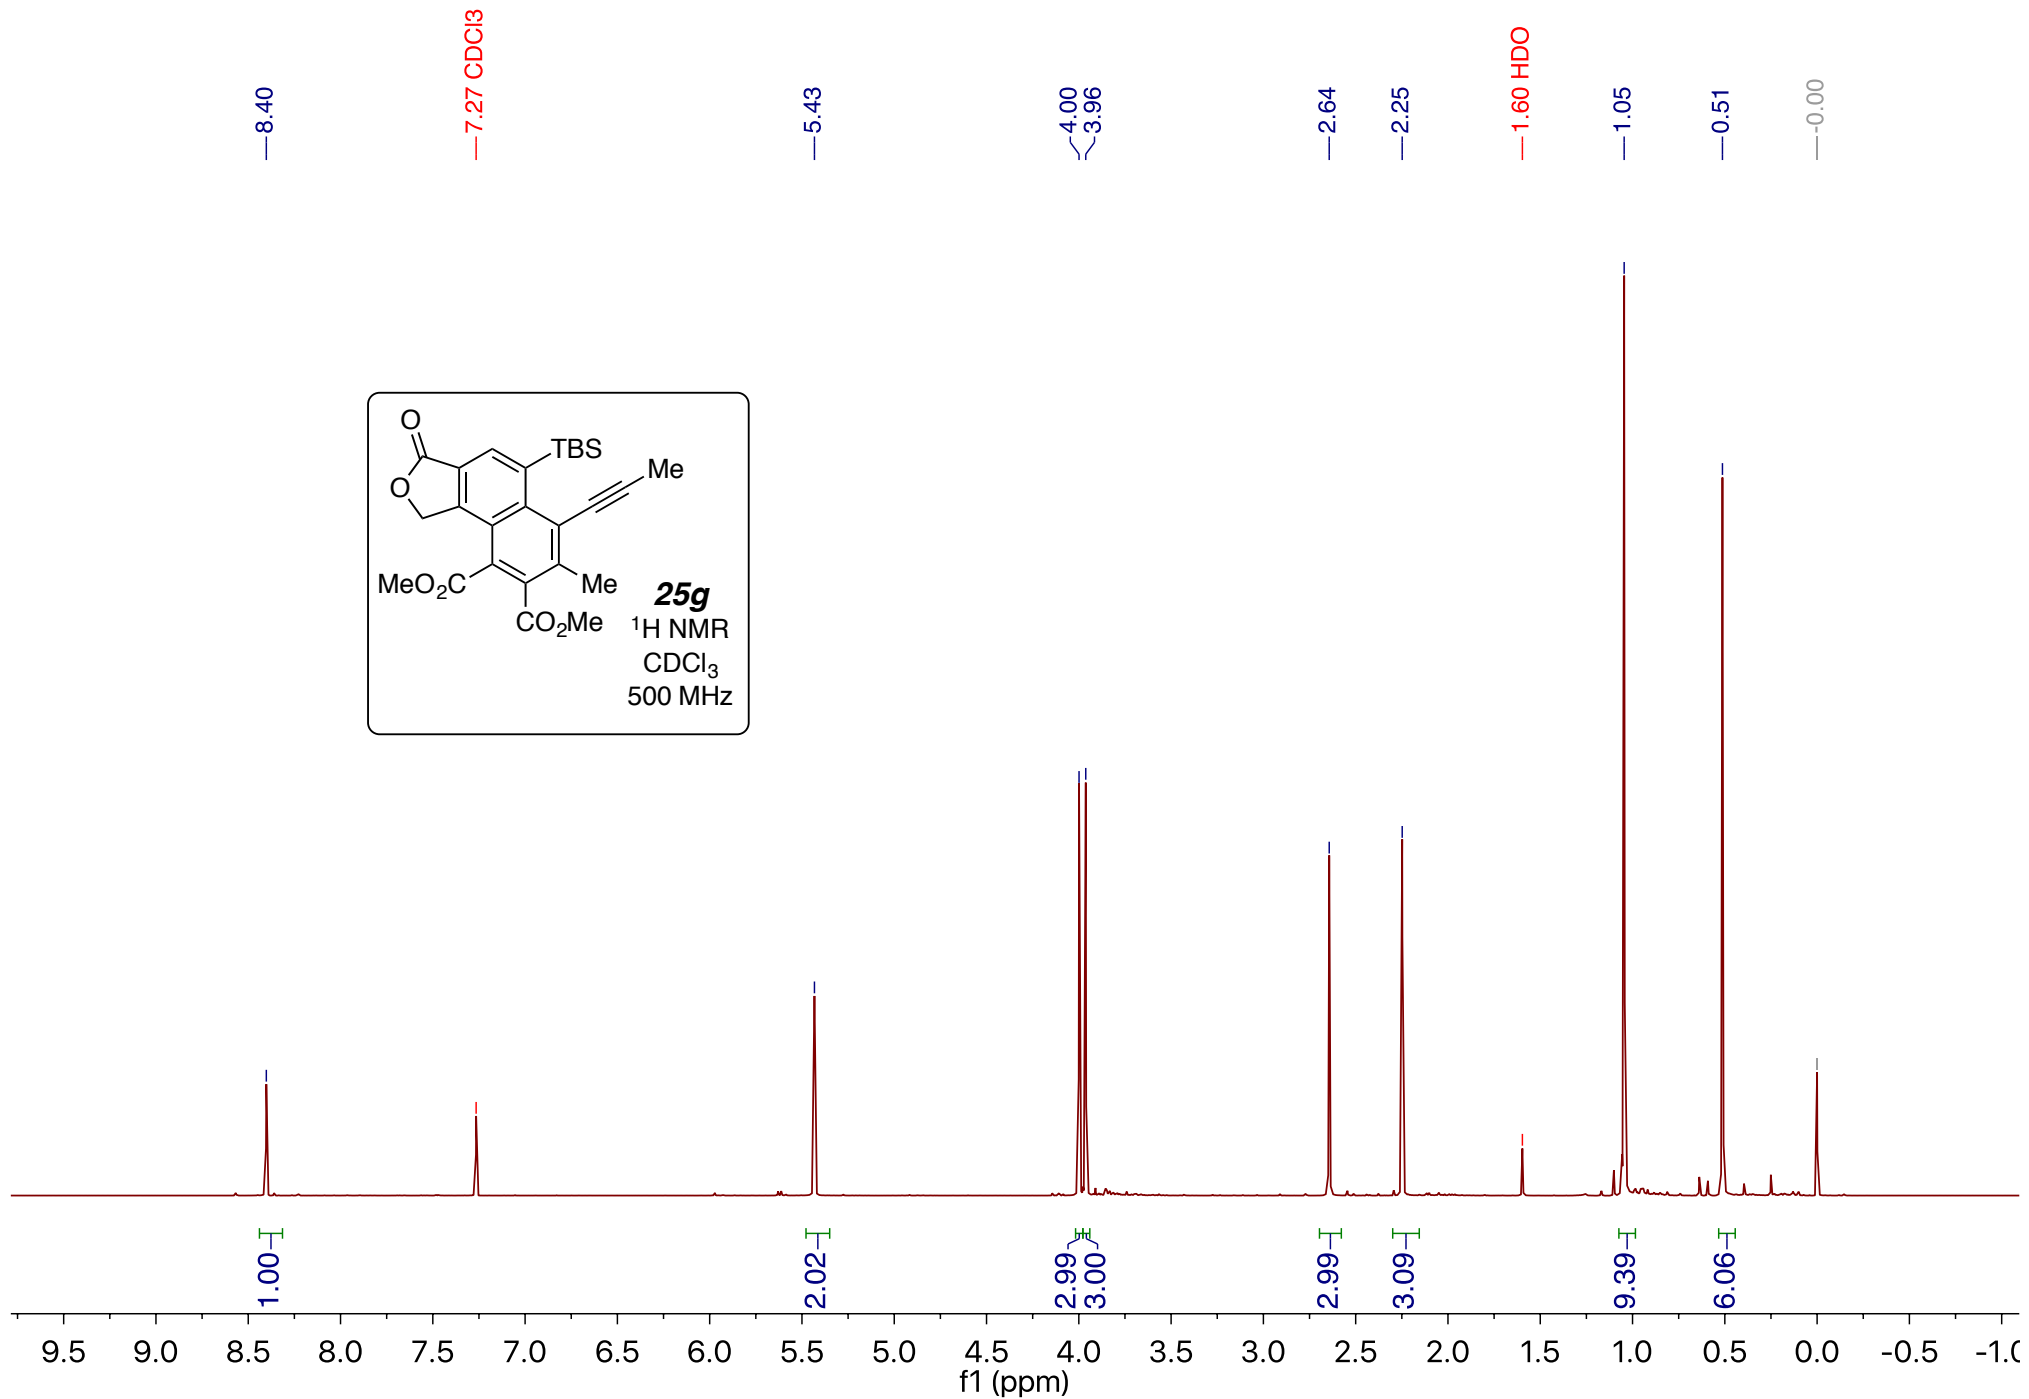

171.0  
168.9  
168.0

146.6  
142.0  
141.3  
140.5  
132.9  
132.1  
128.4  
127.5  
123.2  
123.2

104.6

81.3  
77.4 CDCl<sub>3</sub>  
77.2 CDCl<sub>3</sub>  
76.9 CDCl<sub>3</sub>  
70.0

53.5  
53.1

28.6

20.2  
19.6

6.4

0.0

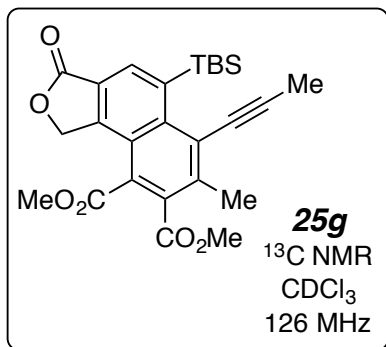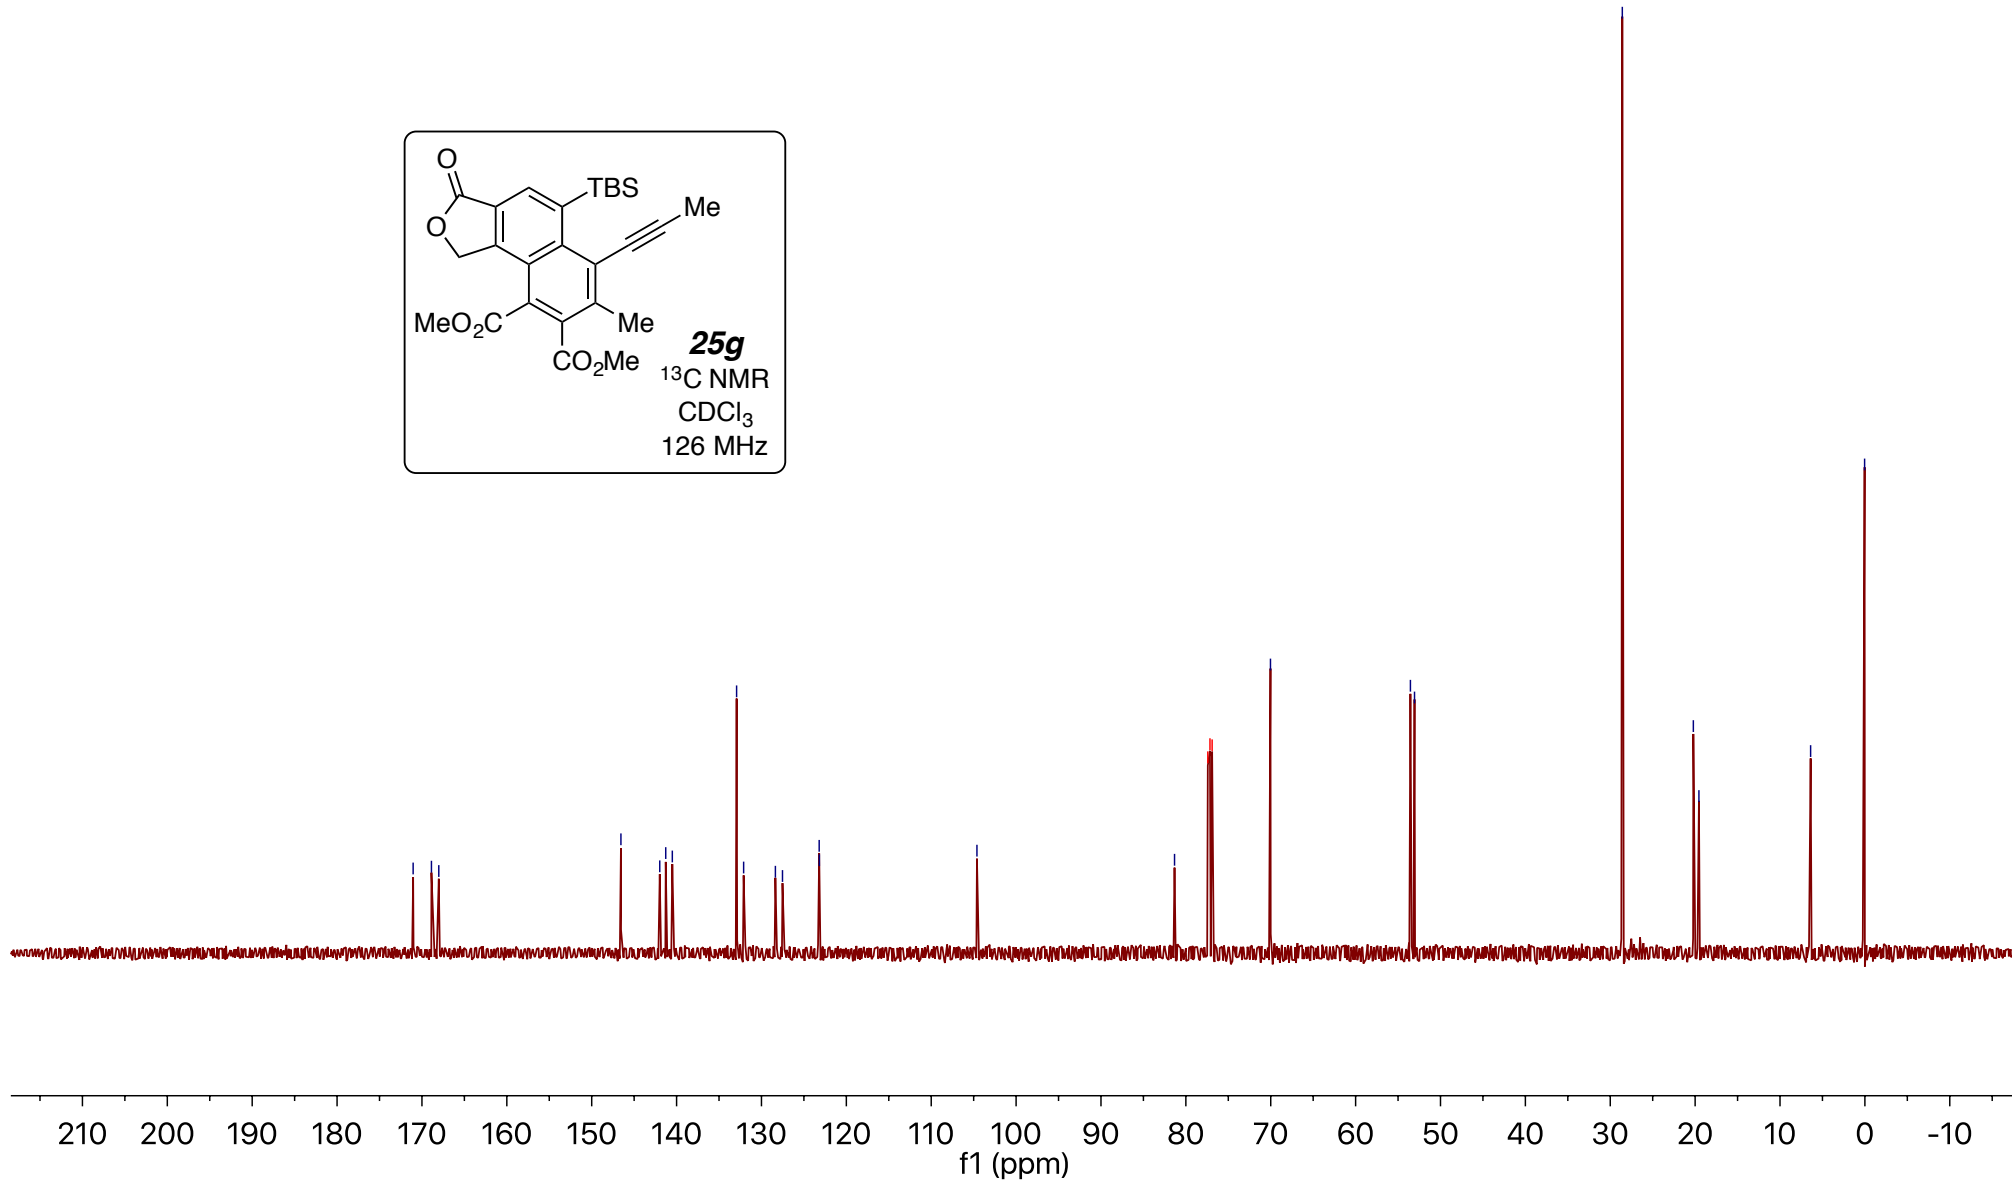

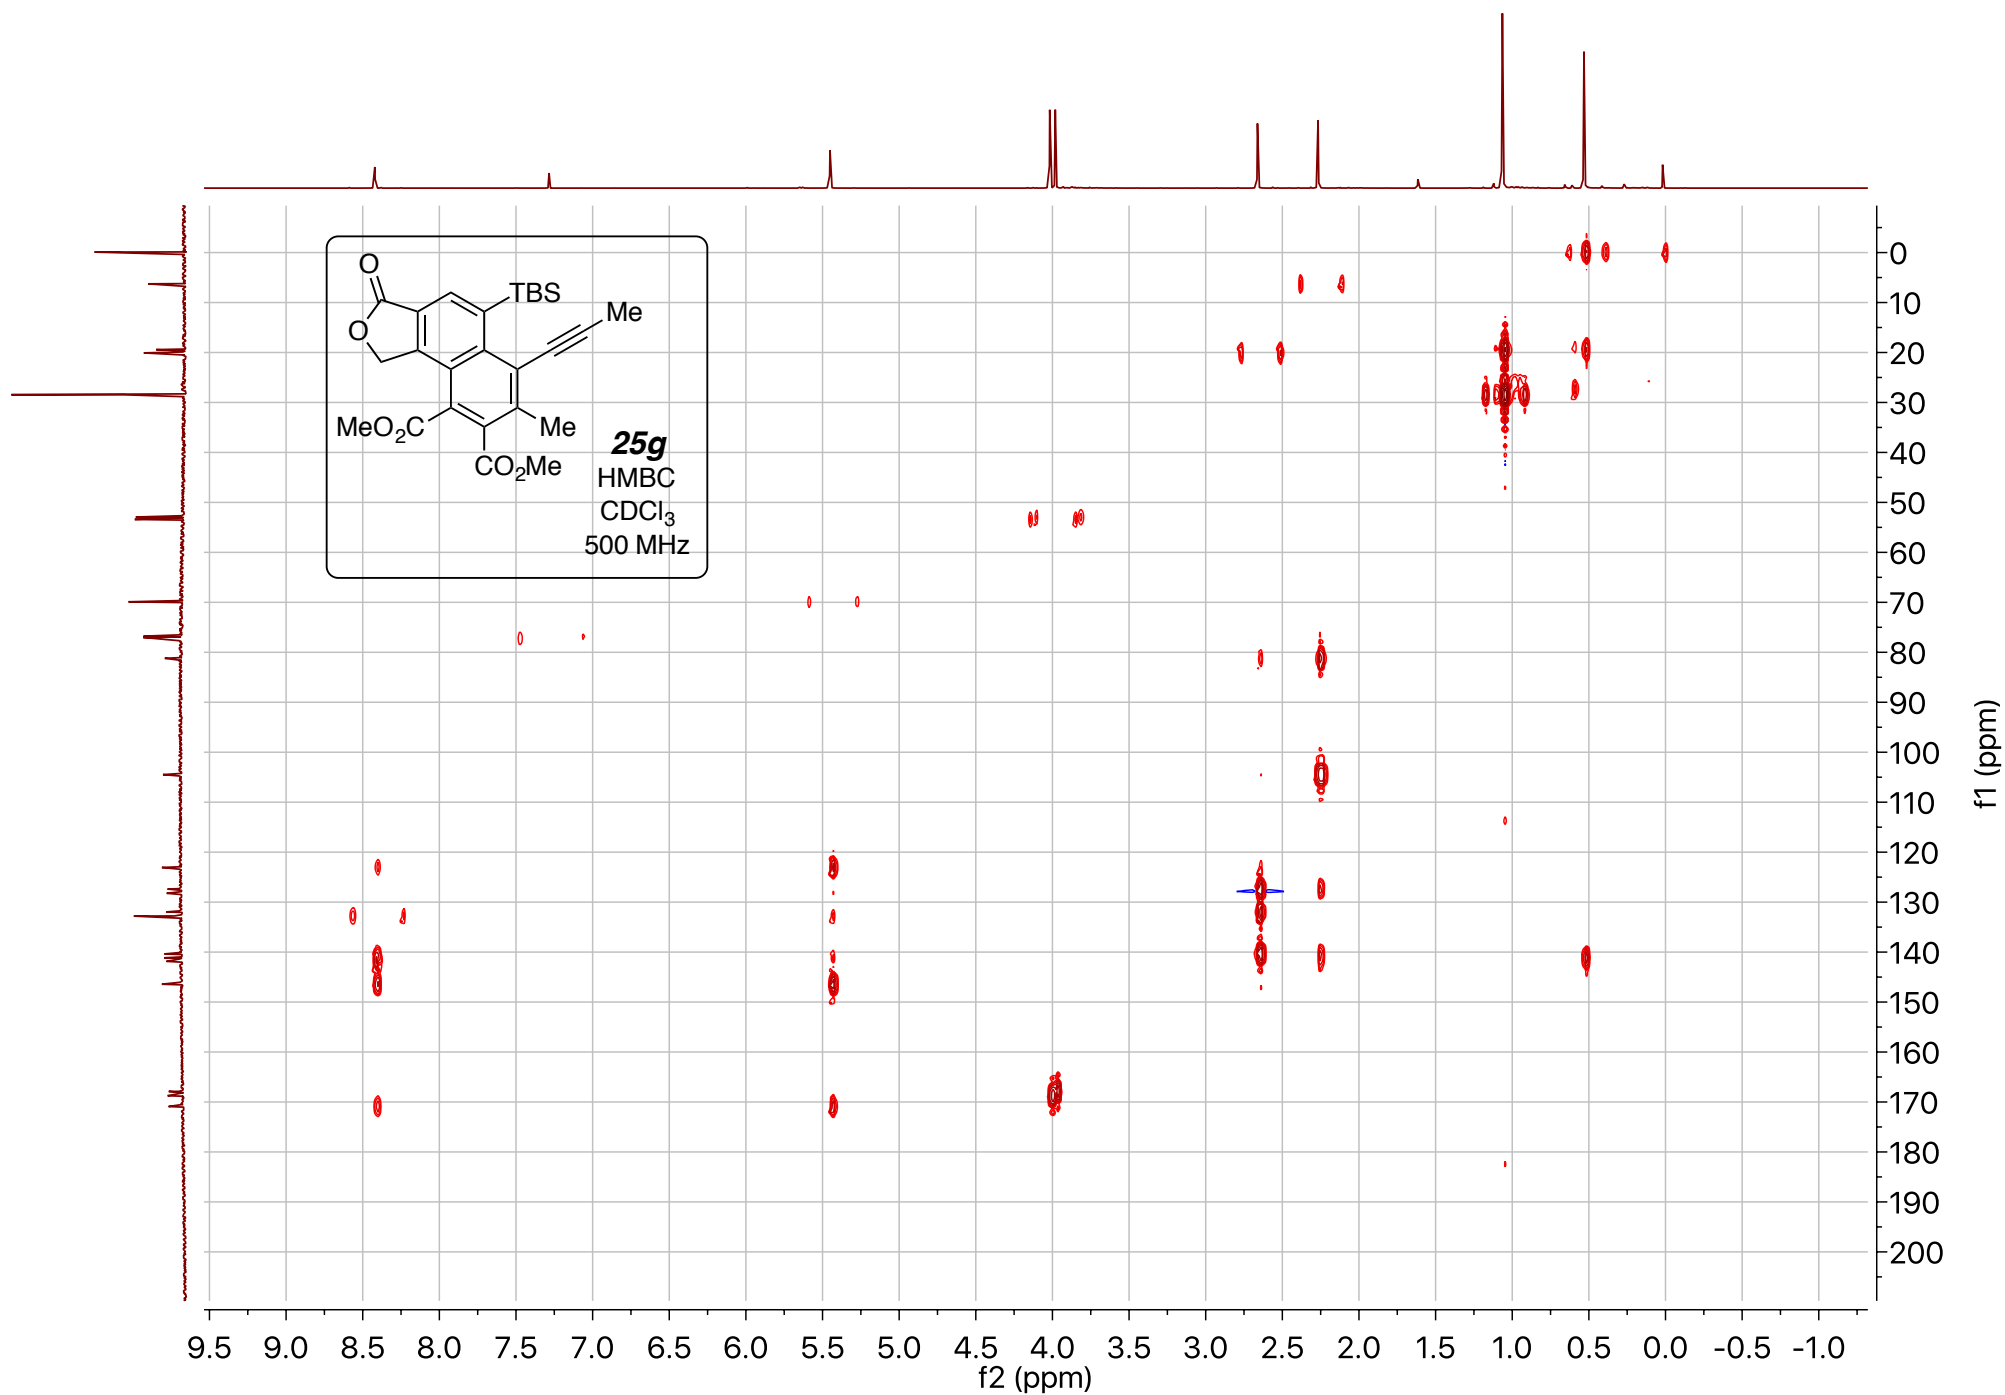

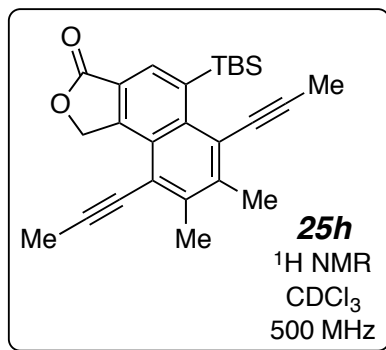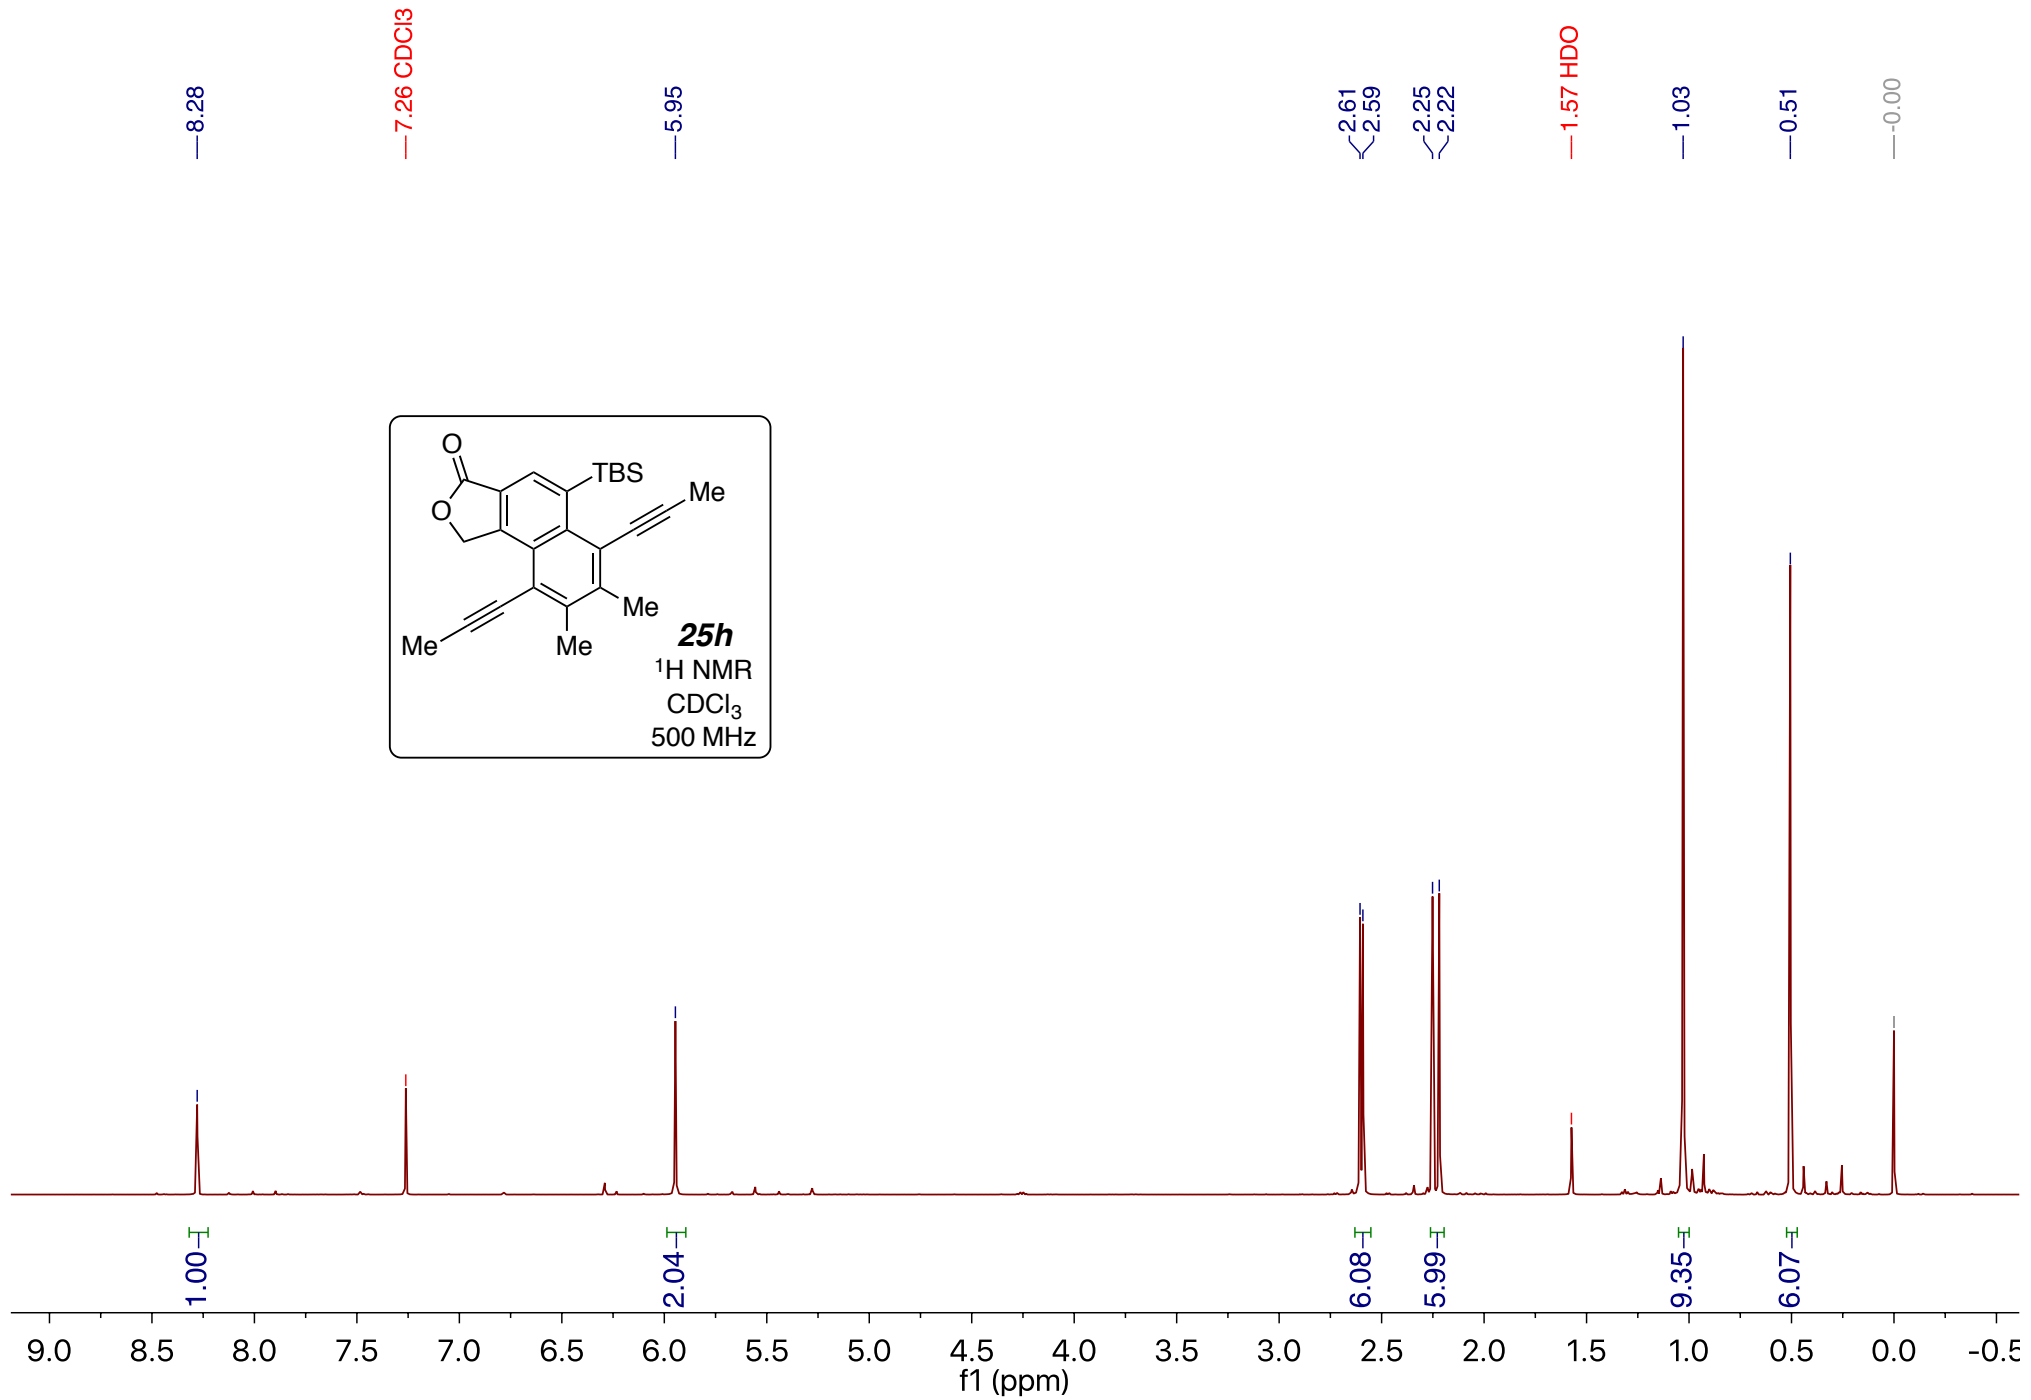

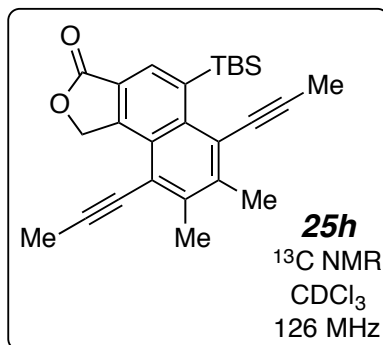

—172.0

147.9

143.5

140.0

139.9

139.9

131.0

128.0

123.4

121.9

119.9

—101.3

—97.3

82.6

79.6

77.4  $\text{CDCl}_3$ 77.2  $\text{CDCl}_3$ 76.9  $\text{CDCl}_3$ 

71.8

28.6

19.9

19.5

19.1

6.4

5.1

0.1

210 200 190 180 170 160 150 140 130 120 110 100 90 80 70 60 50 40 30 20 10 0 -10

f1 (ppm)



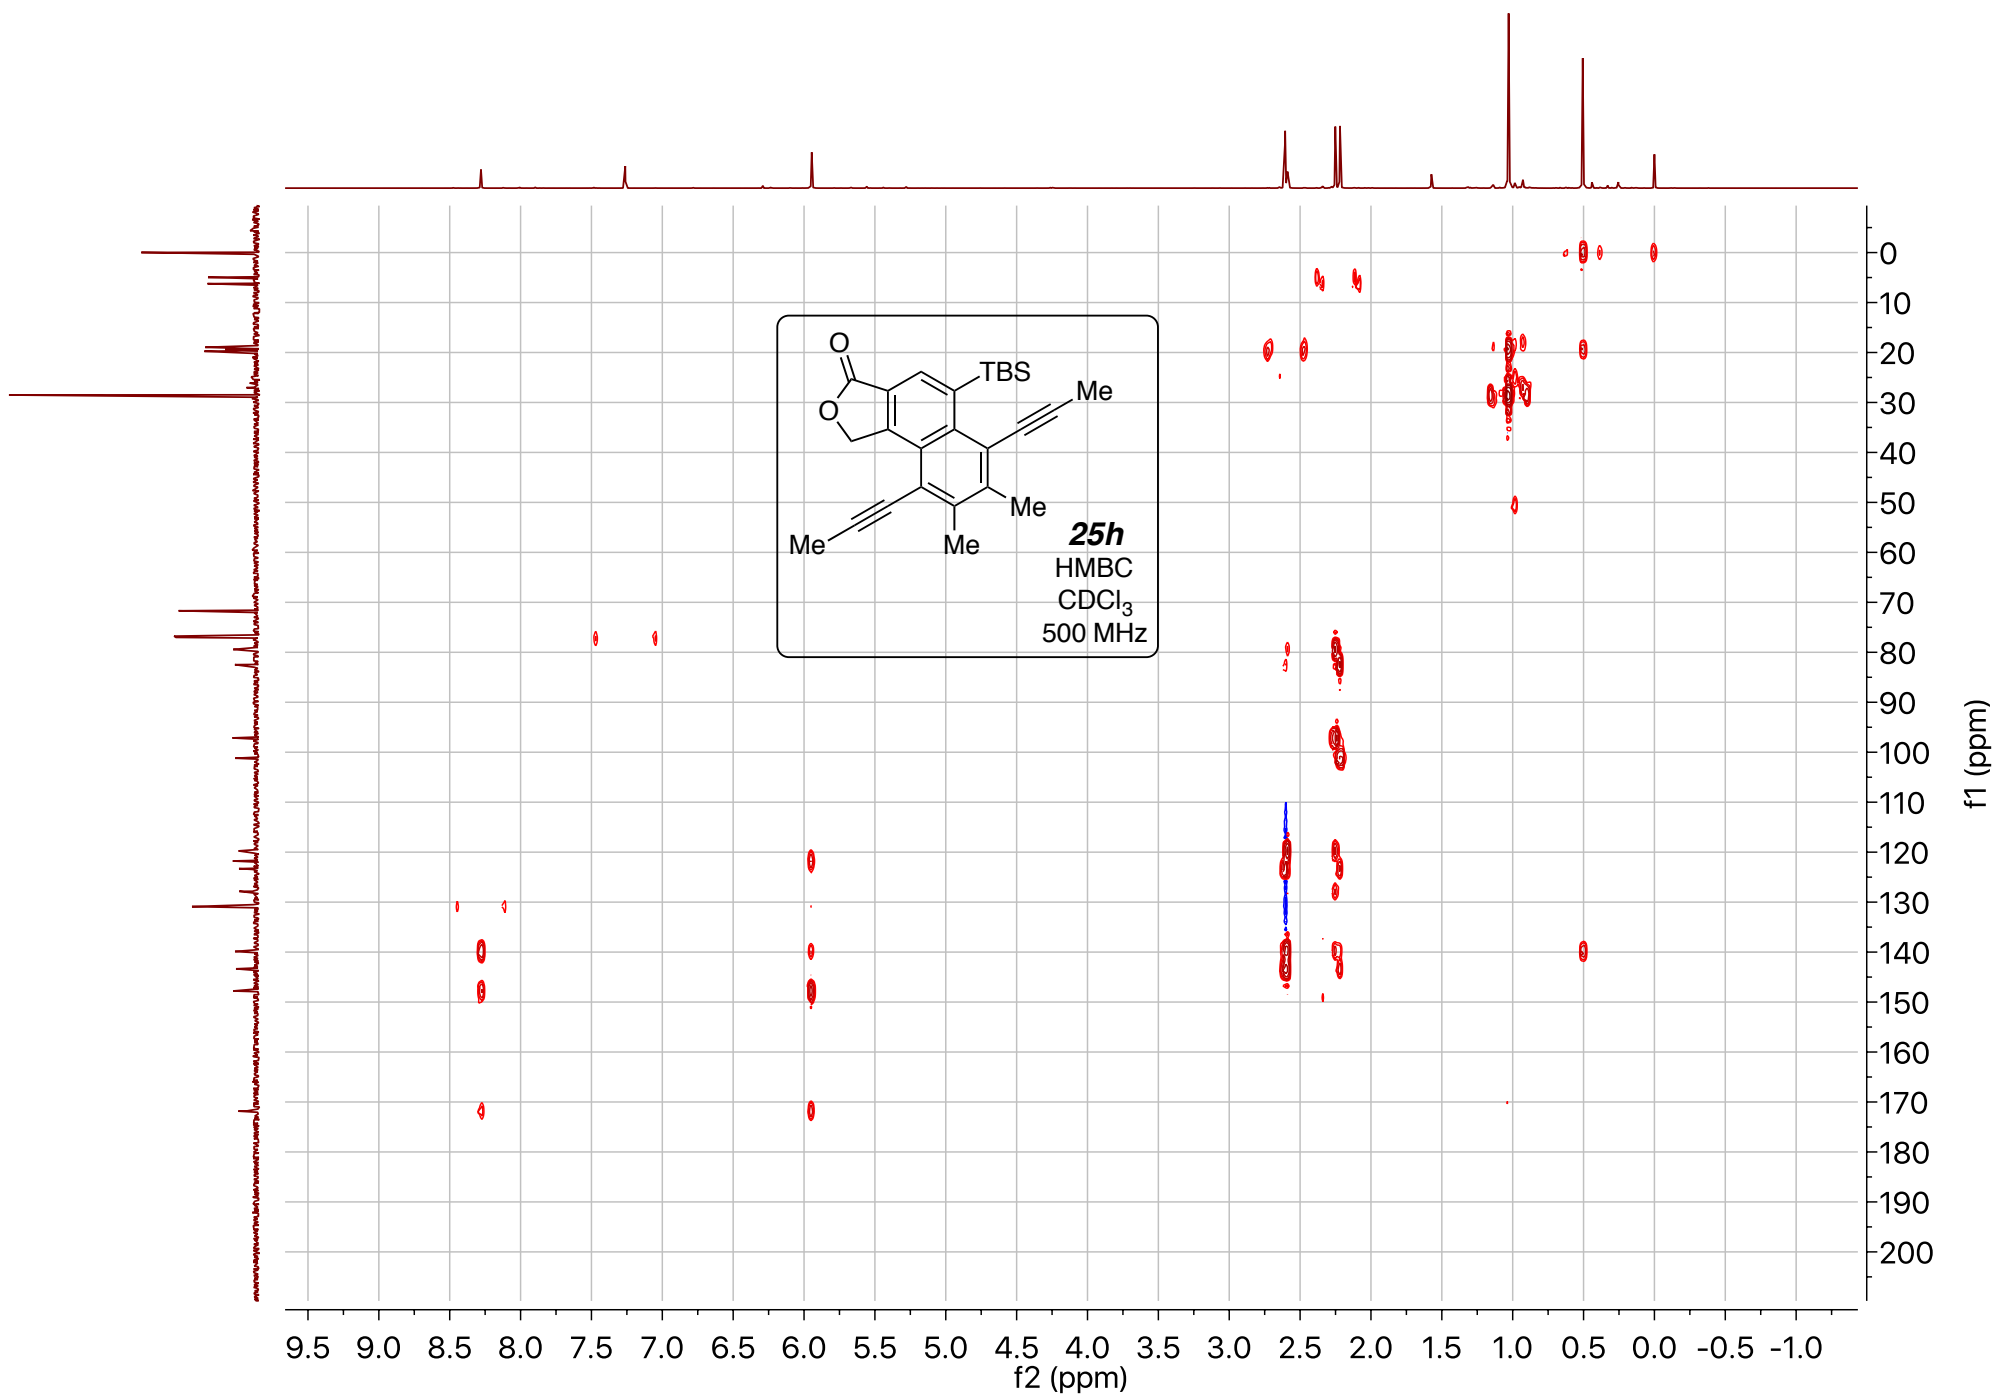



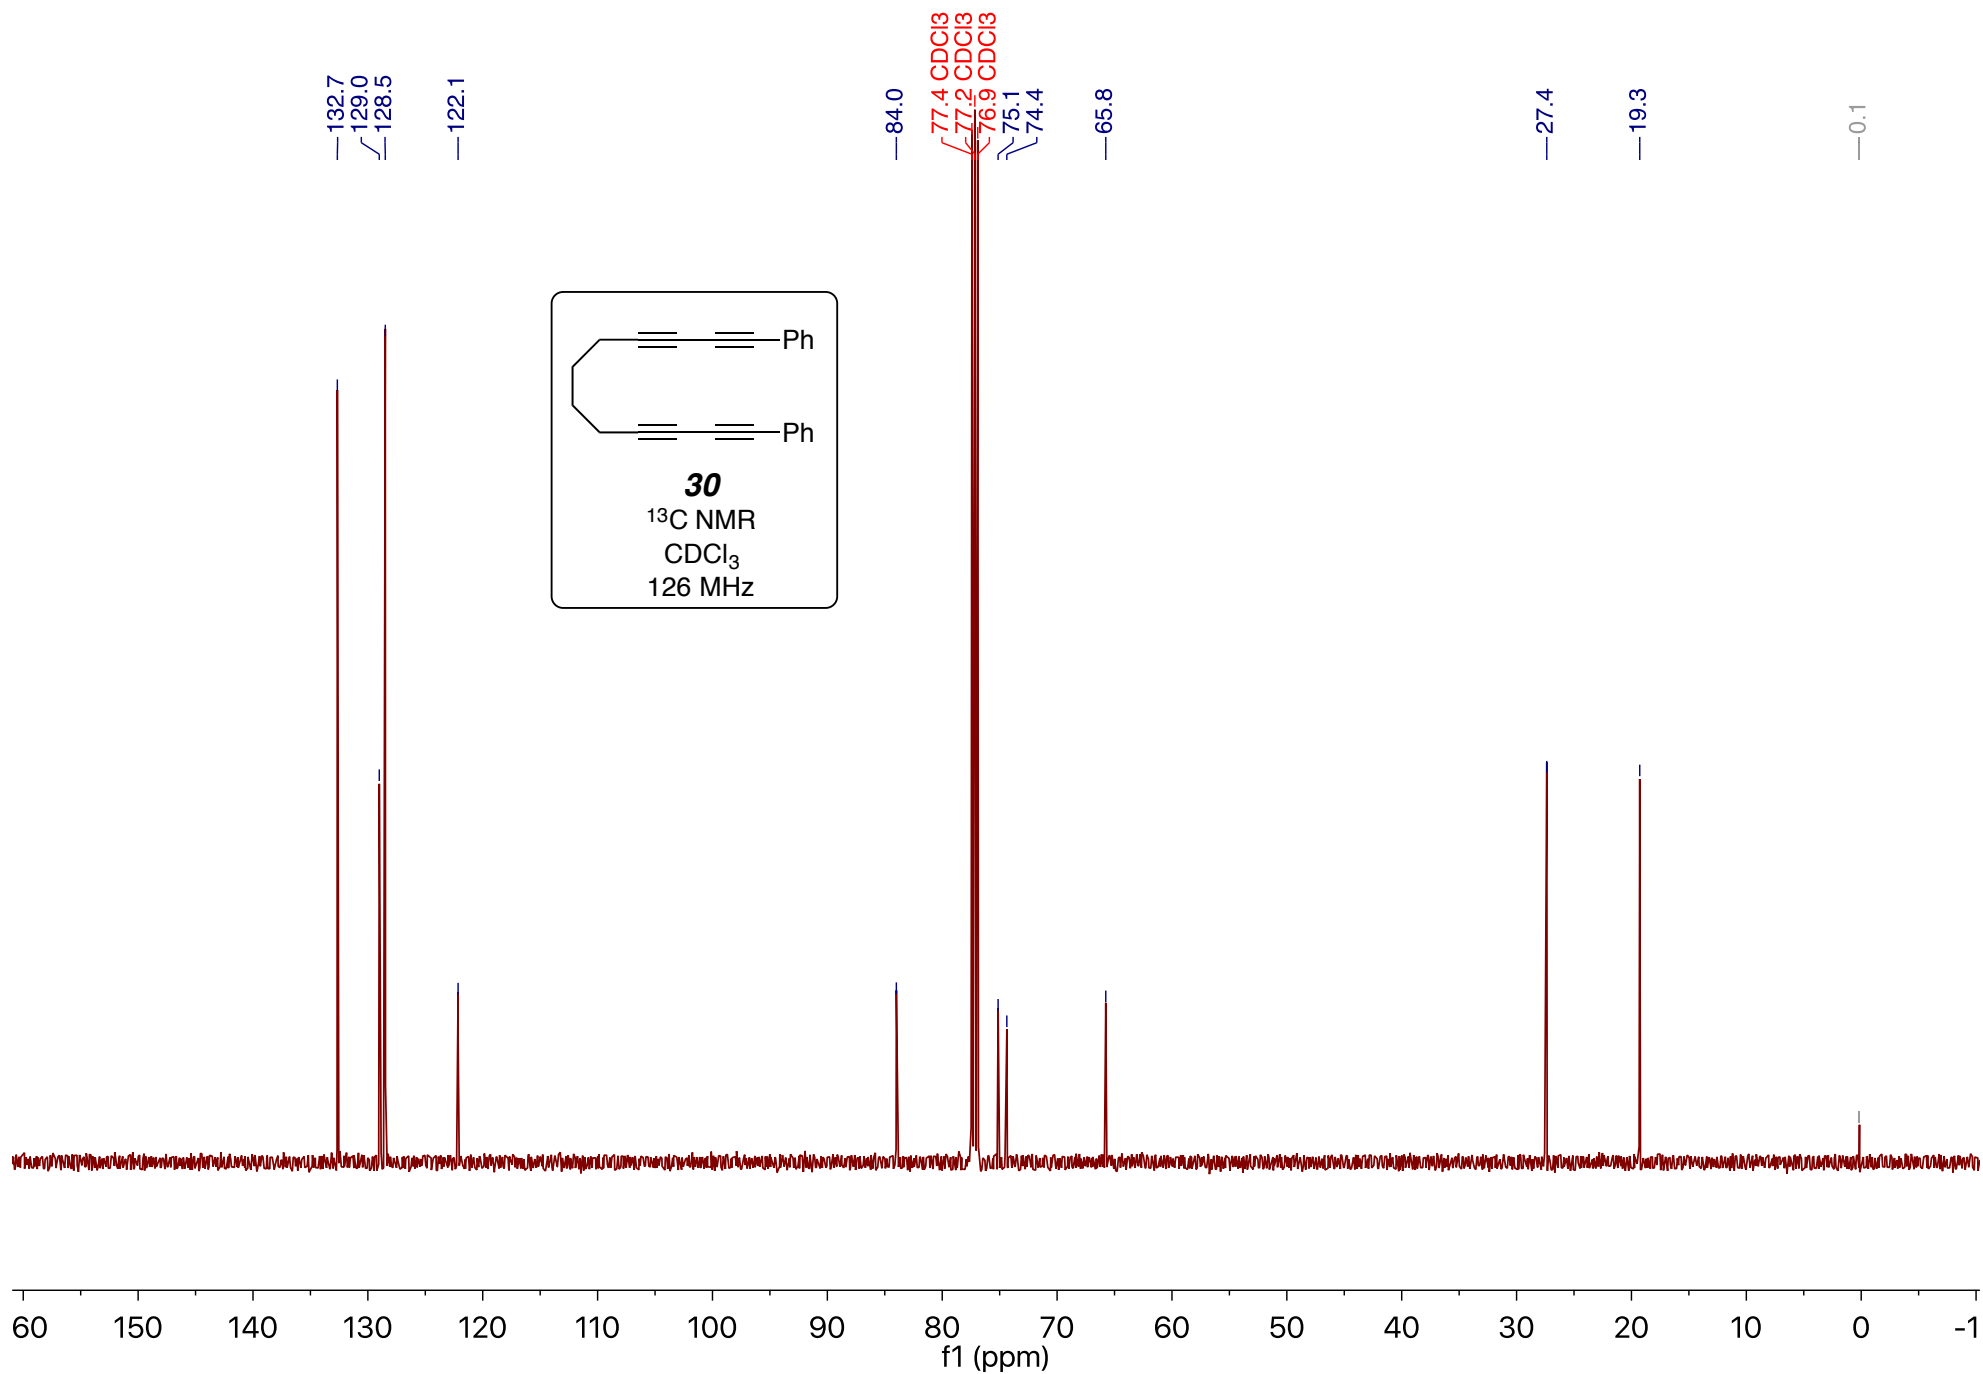

7.53  
7.53  
7.52  
7.51  
7.37  
7.36  
7.35  
7.26 CDCl<sub>3</sub>

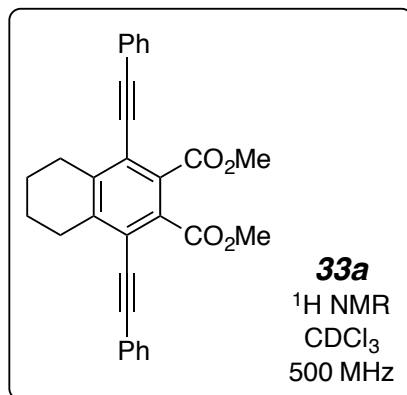

3.94

3.02  
3.01  
3.01  
3.00

1.87  
1.86  
1.86  
1.85  
1.57 H<sub>2</sub>O

-0.00

9.0 8.5 8.0 7.5 7.0 6.5 6.0 5.5 5.0 4.5 4.0 3.5 3.0 2.5 2.0 1.5 1.0 0.5 0.0 -0.5 -1.0  
f1 (ppm)

4.00  
5.93

6.18

4.07

4.07

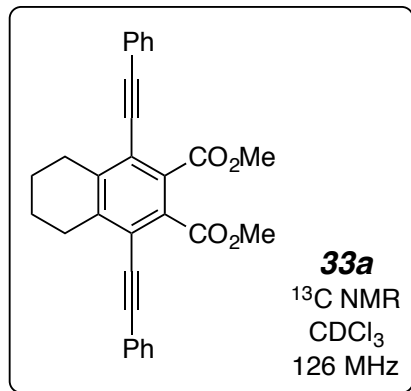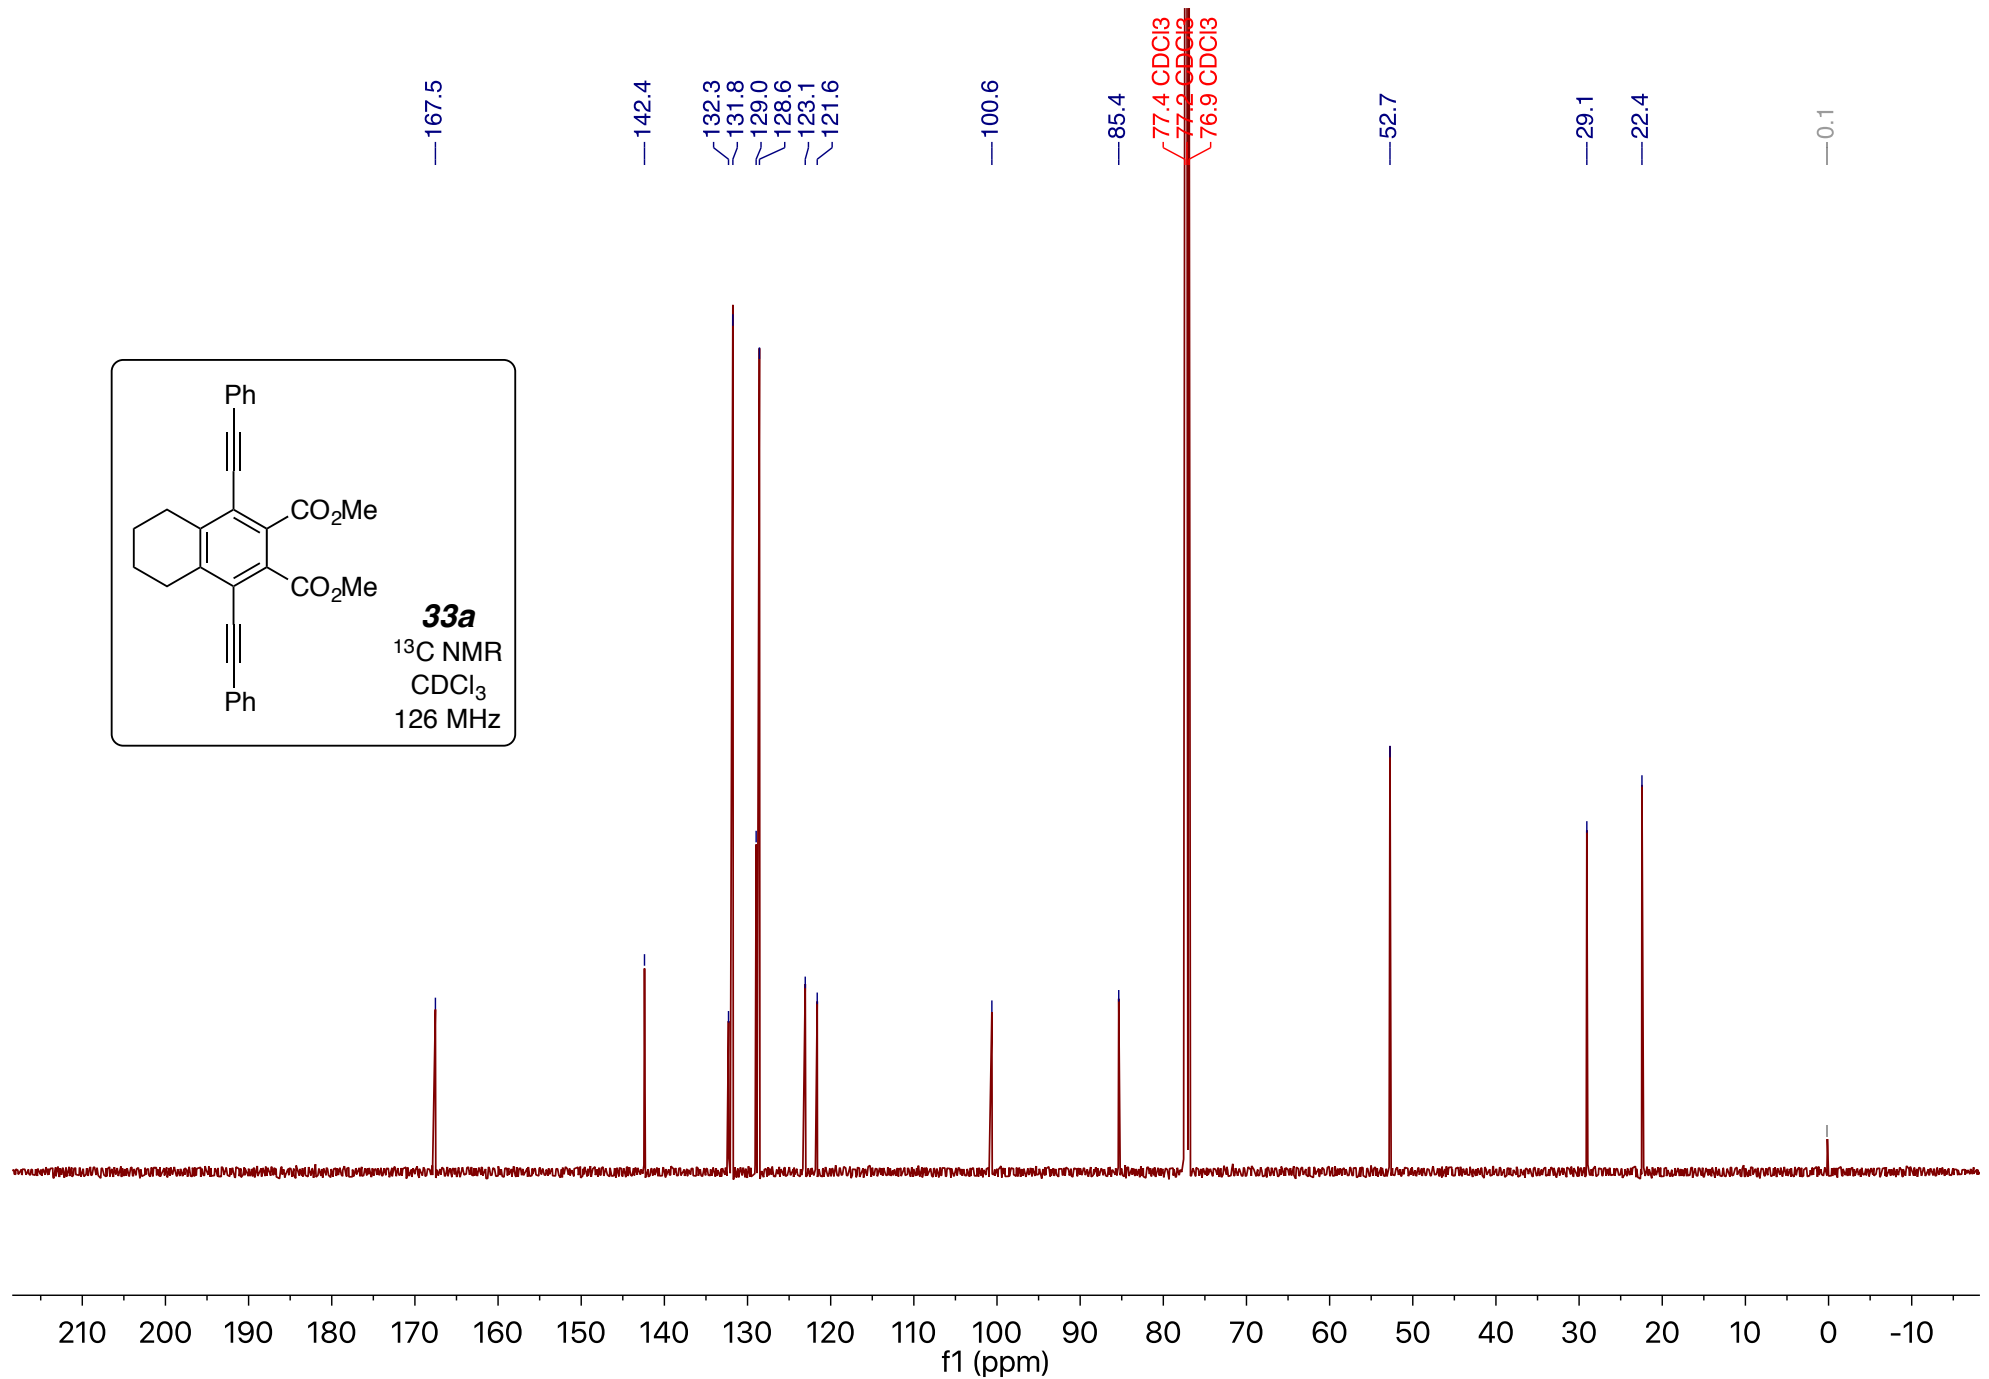

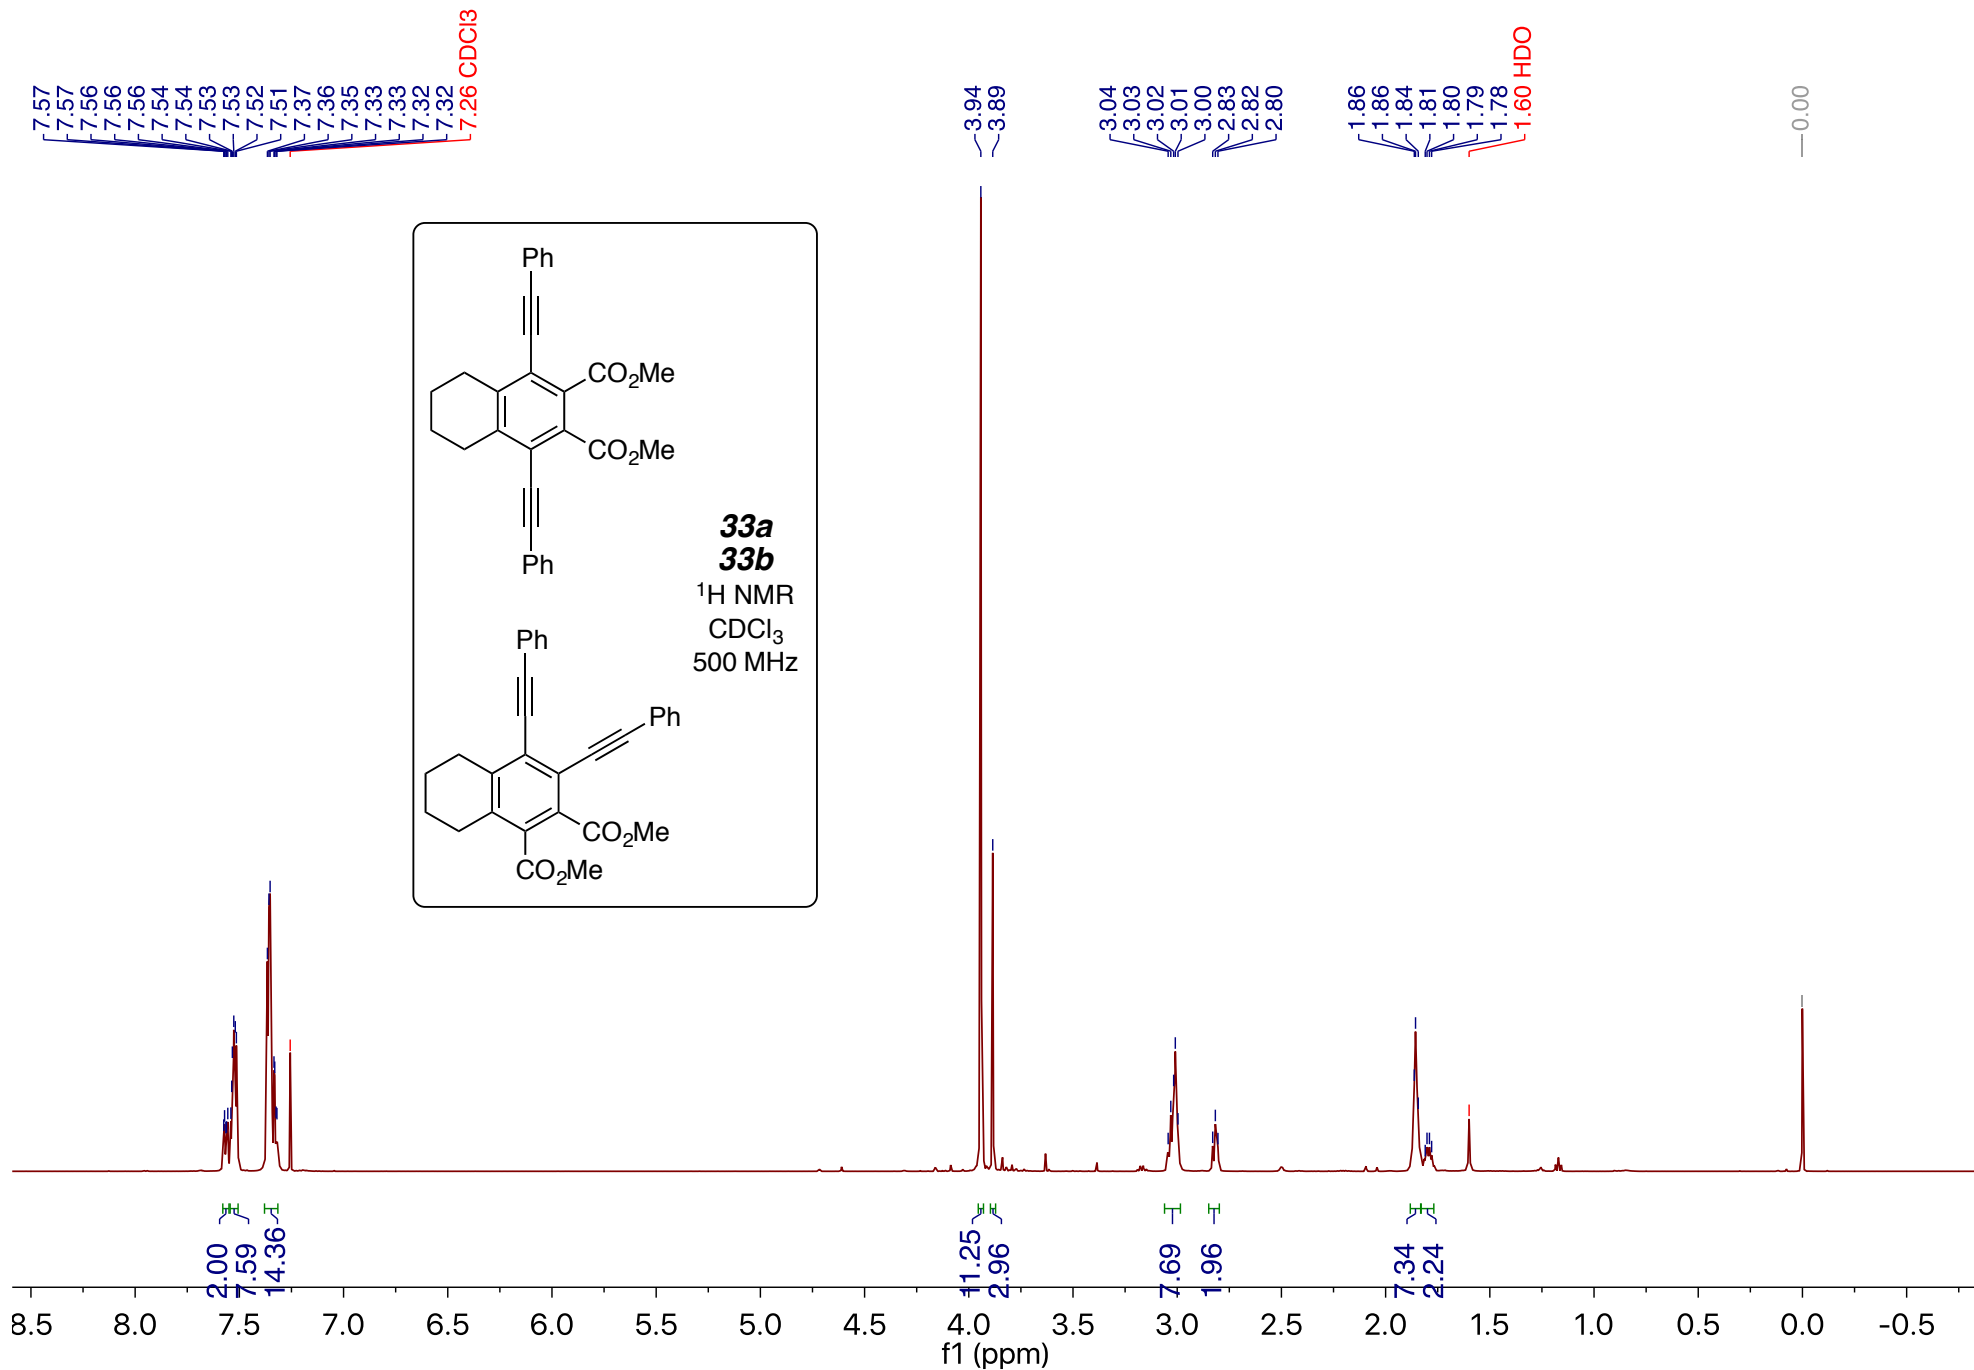

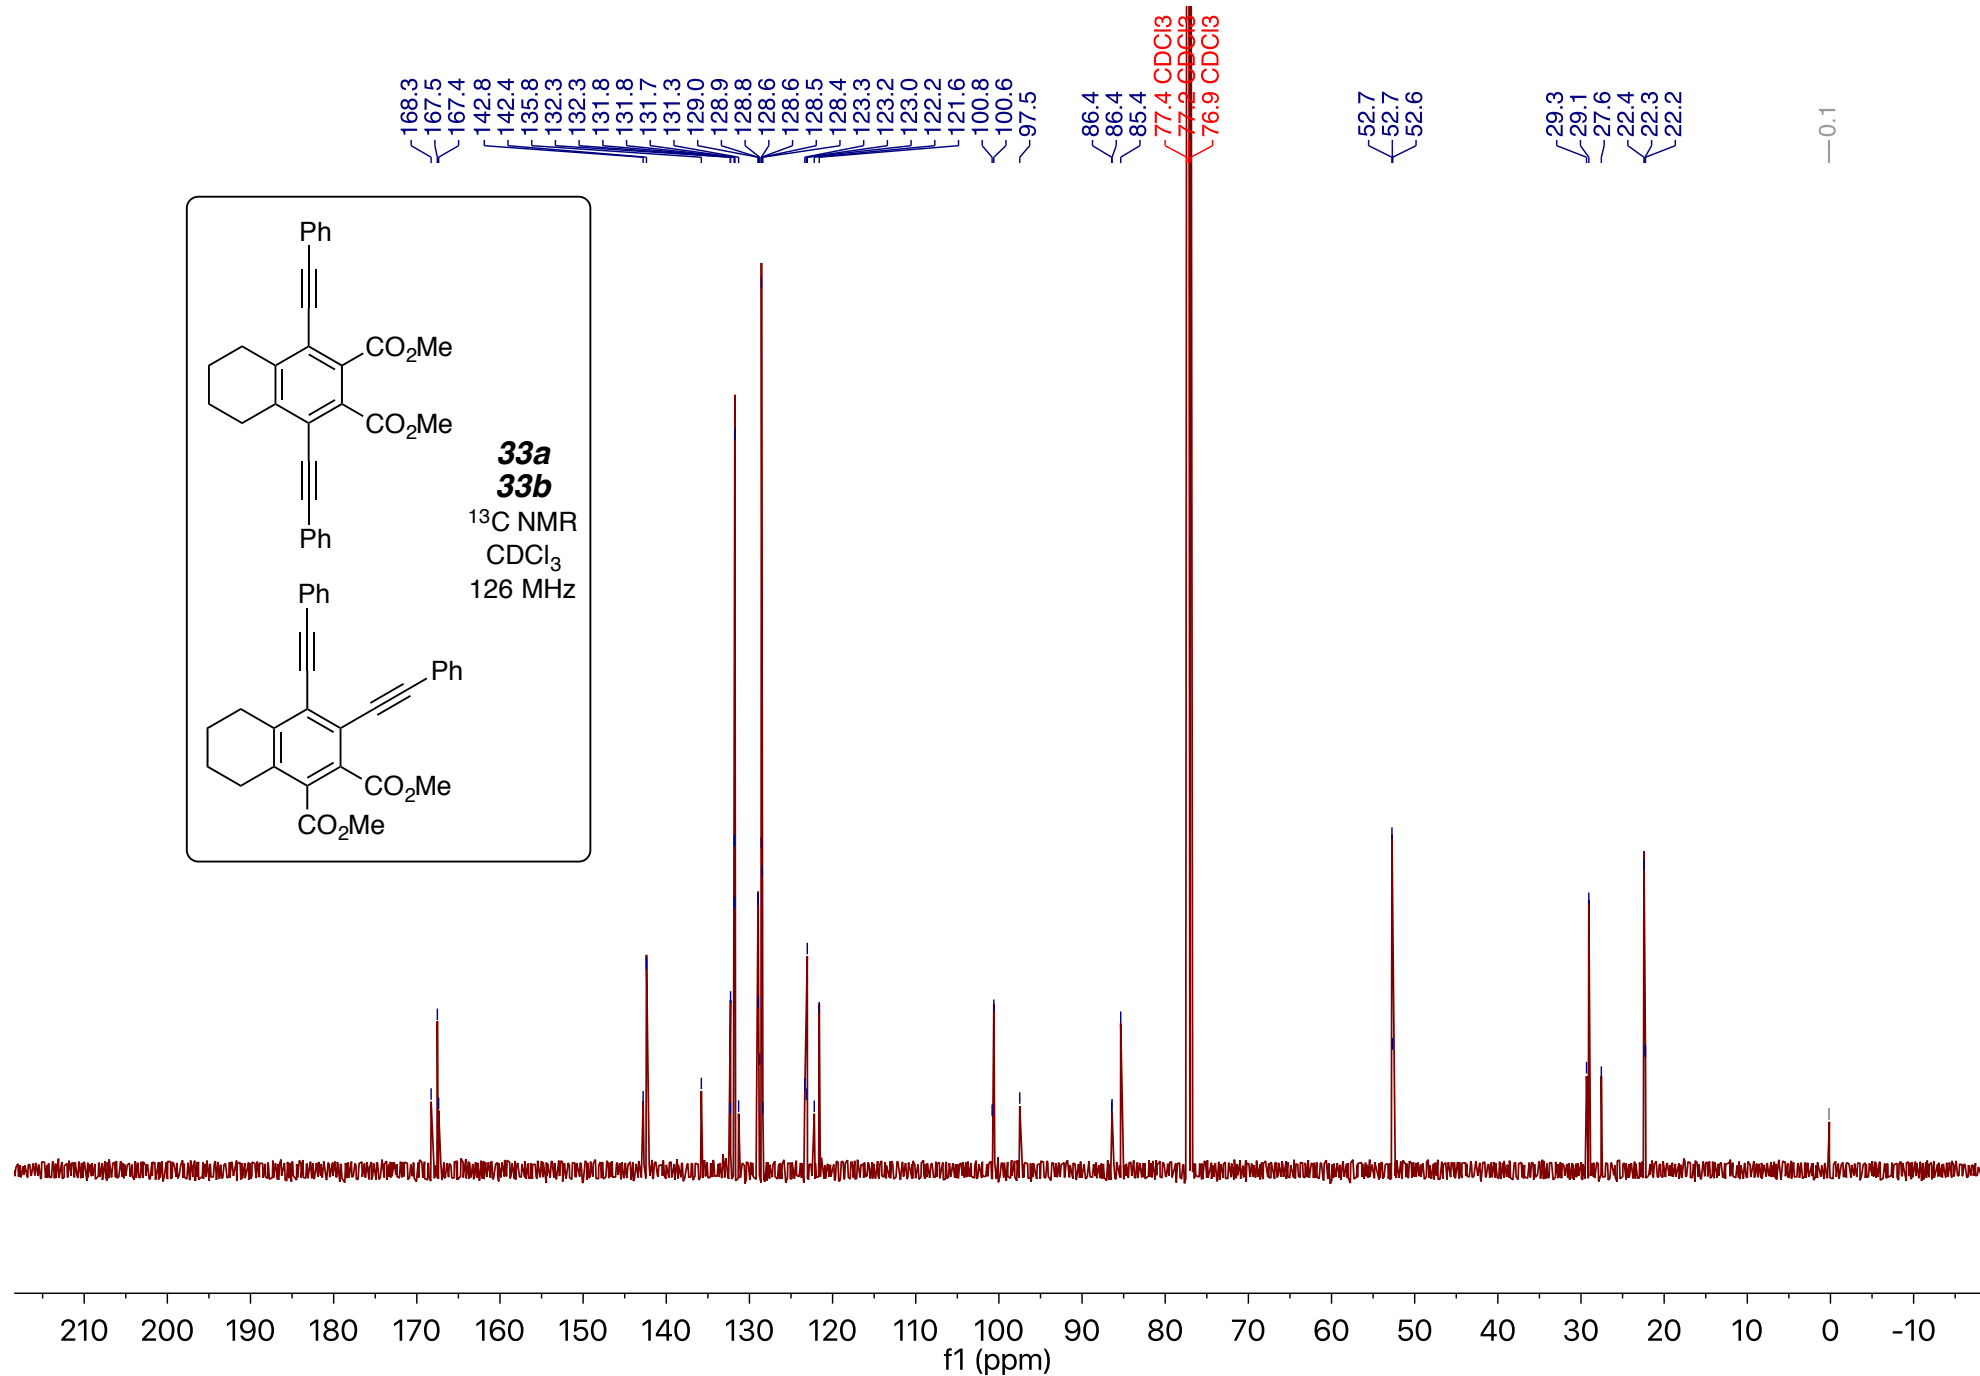

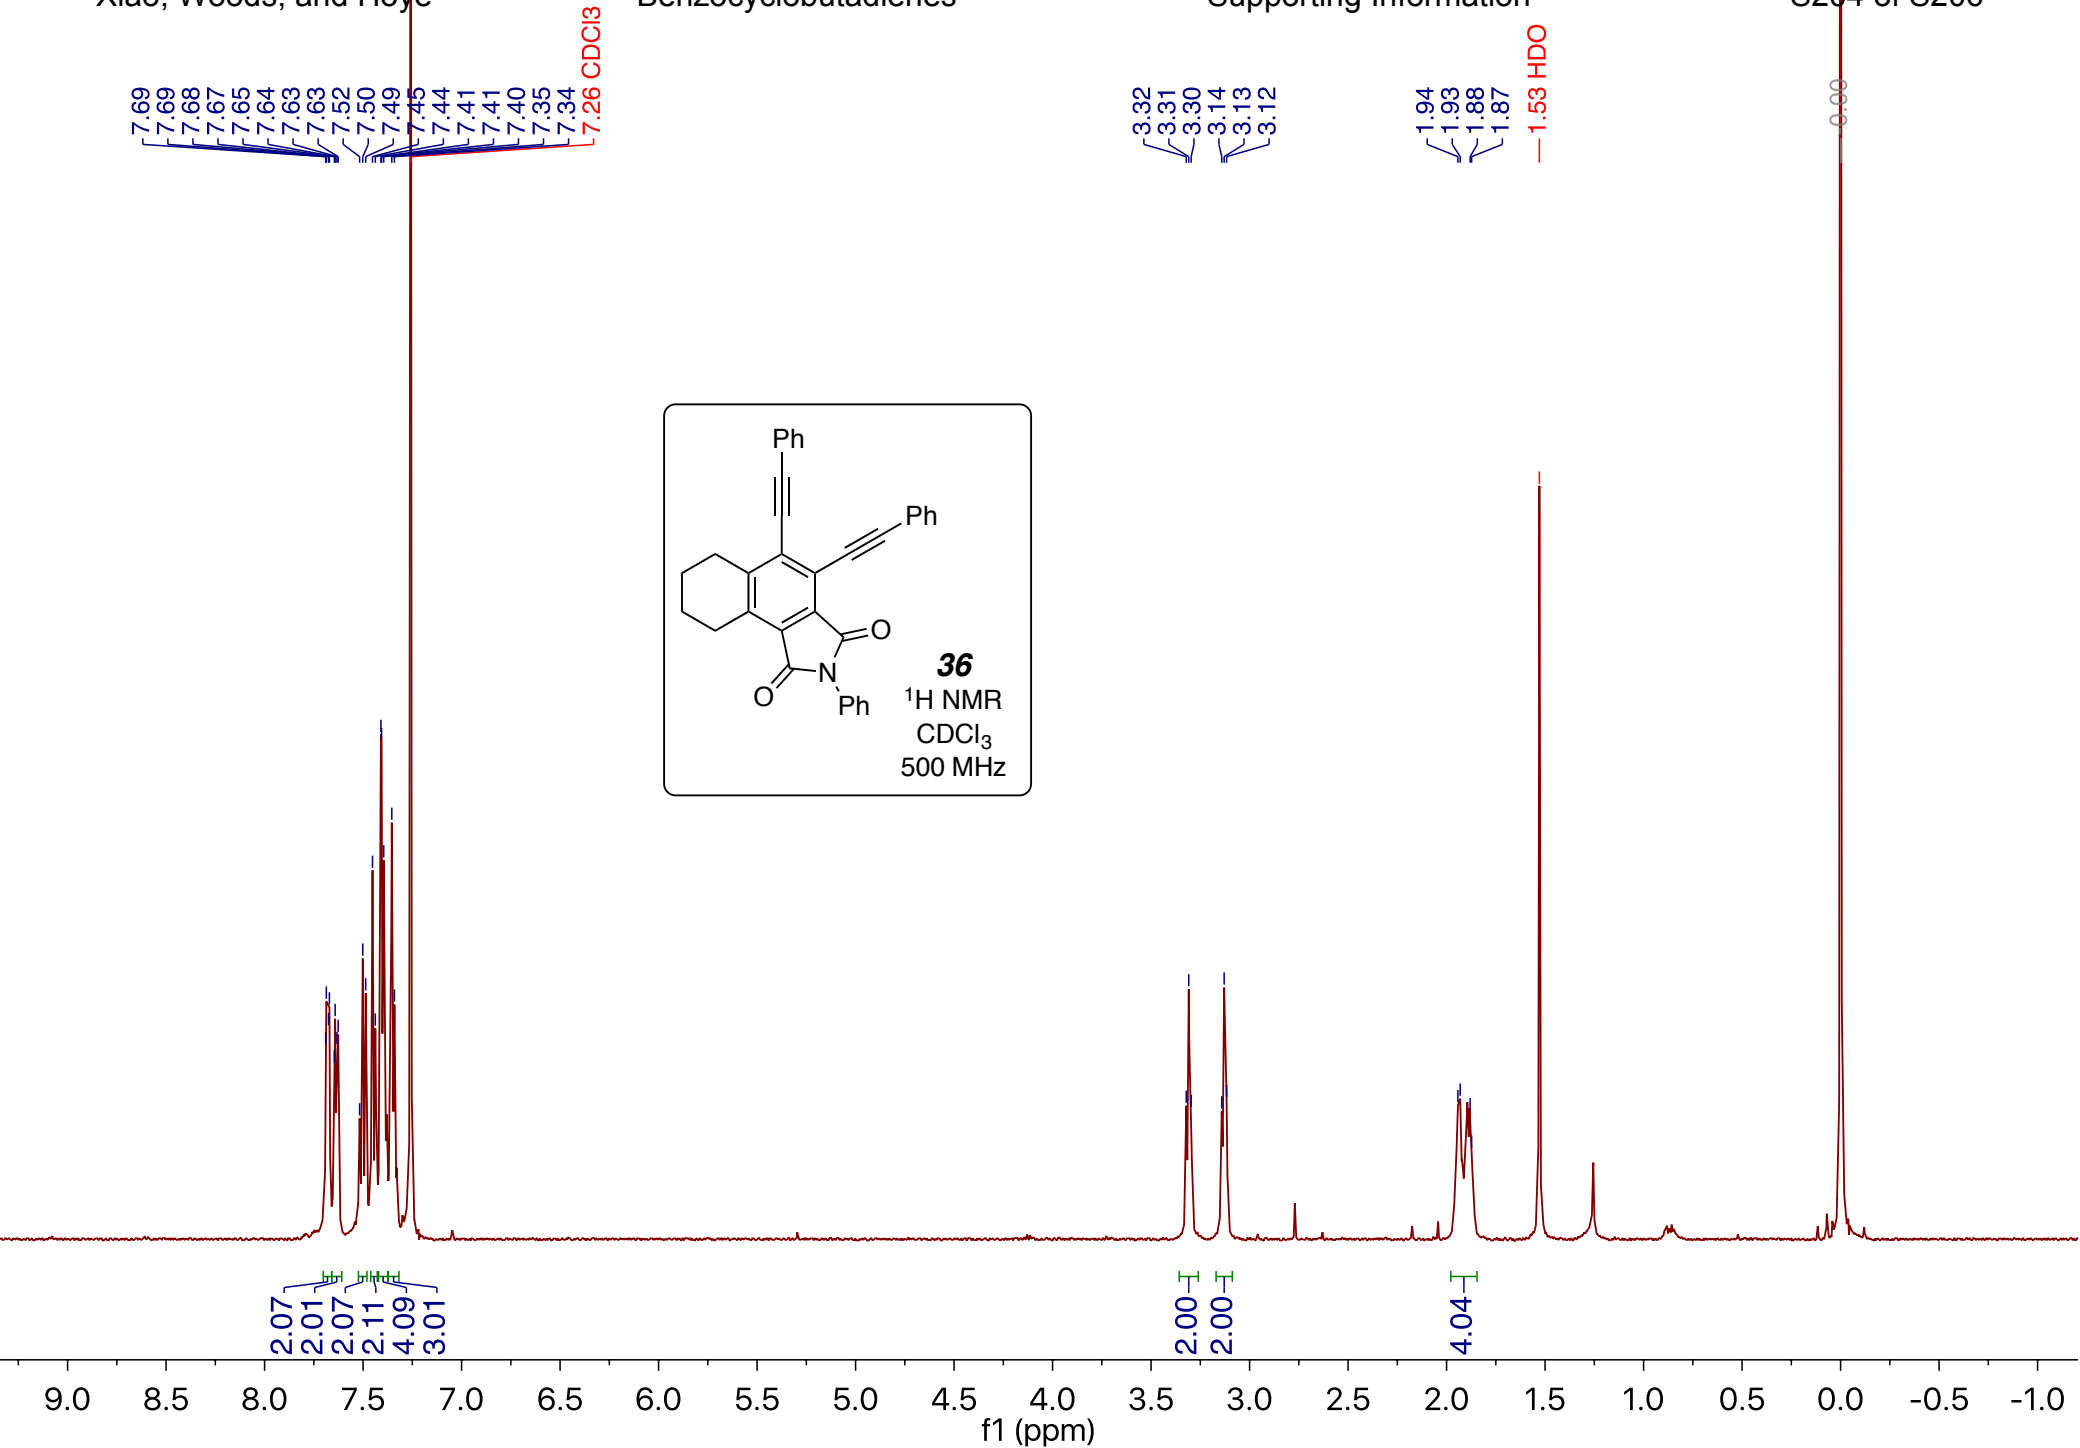





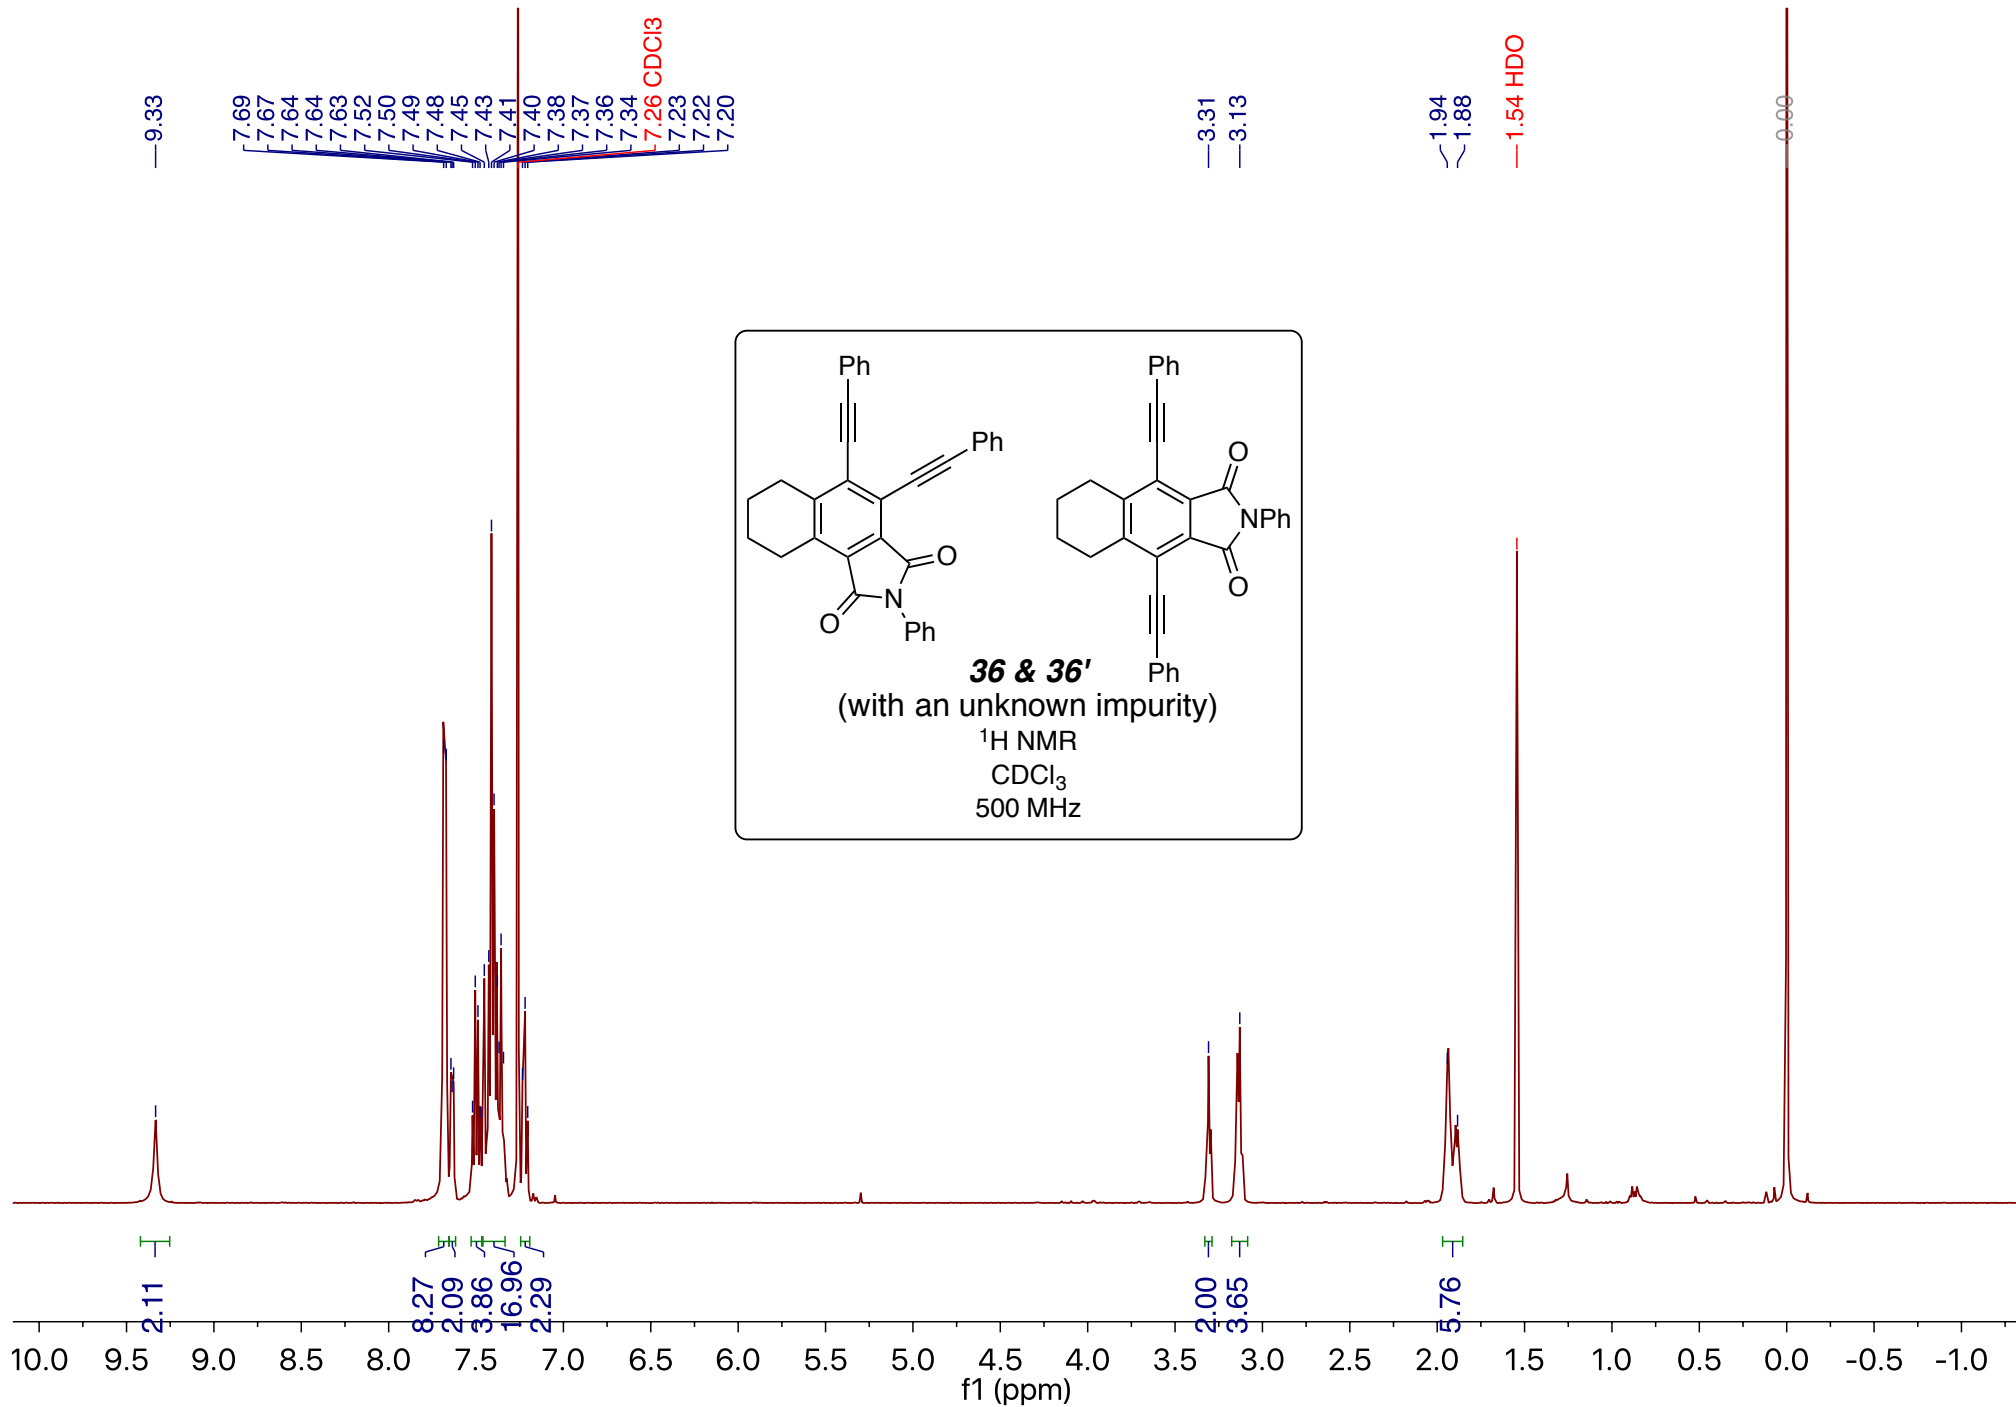

Supplement: NIHMS1516162-supplement-Supporting_Information.pdf [file NIHMS1516162-supplement-Supporting_Information.pdf]
